# Supplementary material for: Brain Regeneration Resembles Brain Cancer at Its Early Wound Healing Stage and Diverges From Cancer Later at Its Proliferation and Differentiation Stages
Source: Front Cell Dev Biol. 2022 Feb 10;10:813314. doi: 10.3389/fcell.2022.813314 (PMC8868567; doi:10.3389/fcell.2022.813314)
Supplement: Supplementary file 1 [file Table2.XLSX]

## Sheet: SIG_1dpl
Supplementary Table 2: Differentially expressed genes across stages of zebrafish brain regeneration under the conditions of fold change > 1.5 (in both directions) and Benjamini-Hochberg adjusted p-value (FDR) < 0.05.
ZebrafishGeneID	log2FoldChange	pvalue	padj	ZebrafishGeneName	gene_biotype
ENSDARG00000099511	22.0622	2.08867e-10	1.62195e-08	CABZ01034698.2	protein_coding
ENSDARG00000099384	21.8061	2.72311e-06	5.90226e-05	si:dkey-238k10.1	protein_coding
ENSDARG00000092228	20.1978	0.000100666	0.00111388	si:dkey-27p18.3	protein_coding
ENSDARG00000102593	20.192	0.000183511	0.00179503	si:ch211-214b16.2	protein_coding
ENSDARG00000069189	19.7157	0.000259828	0.00235977	si:dkey-242h9.3	protein_coding
ENSDARG00000071143	17.6842	0.00105594	0.0068371	si:dkey-208m12.2	protein_coding
ENSDARG00000102946	17.5808	0.00112859	0.00717433	si:ch73-167f10.1	protein_coding
ENSDARG00000096906	15.7753	4.37111e-13	6.53343e-11	si:dkey-7i4.24	protein_coding
ENSDARG00000093098	13.3069	1.33291e-07	4.3931e-06	ccl34b.8	protein_coding
ENSDARG00000096979	13.024	8.10629e-10	5.43474e-08	NPC2 (1 of many)	protein_coding
ENSDARG00000095798	12.8158	1.07523e-07	3.667e-06	BX666064.1	lincRNA
ENSDARG00000095820	12.3136	1.6009e-07	5.14942e-06	BX649485.4	lincRNA
ENSDARG00000043436	11.9623	1.80019e-08	7.66518e-07	si:dkey-5n18.1	protein_coding
ENSDARG00000100332	11.2289	1.12354e-07	3.79576e-06	CABZ01084942.1	protein_coding
ENSDARG00000079645	11.2029	0.00286963	0.0143568	sc:d217	protein_coding
ENSDARG00000059049	11.0553	0.000405151	0.00330927	zgc:174904	protein_coding
ENSDARG00000098099	10.951	1.71874e-07	5.48878e-06	zgc:64065	protein_coding
ENSDARG00000076140	10.7189	5.30646e-07	1.45191e-05	clcf1	protein_coding
ENSDARG00000089362	10.6053	7.31941e-08	2.63792e-06	grn1	protein_coding
ENSDARG00000104399	10.4179	4.50123e-06	8.93129e-05	tppp	protein_coding
ENSDARG00000071024	10.3695	8.63862e-05	0.000986722	zgc:171679	protein_coding
ENSDARG00000037859	10.2612	4.90946e-06	9.57452e-05	il11a	protein_coding
ENSDARG00000033355	10.2533	3.11653e-06	6.62853e-05	zgc:101699	protein_coding
ENSDARG00000094983	10.1655	2.72982e-06	5.91086e-05	ccl34a.3	protein_coding
ENSDARG00000026417	10.1046	8.19432e-06	0.000146804	ccr12b.2	protein_coding
ENSDARG00000093602	10.0496	0.000458143	0.00363861	si:ch211-93g21.1	protein_coding
ENSDARG00000116660	9.71008	7.76916e-06	0.000140823	pigrl2.3	protein_coding
ENSDARG00000100000	9.64787	0.00830655	0.0319704	CR352226.5	lincRNA
ENSDARG00000095801	9.62814	1.87664e-11	1.89313e-09	BX649485.2	lincRNA
ENSDARG00000102299	9.41257	0.00620727	0.0256268	cxcl8b.1	protein_coding
ENSDARG00000077862	9.39715	0.00224398	0.0119435	si:dkey-169i5.4	protein_coding
ENSDARG00000043802	9.23524	1.22798e-05	0.000205661	ms4a17a.9	protein_coding
ENSDARG00000096645	9.21545	0.0125398	0.0434975	si:ch211-131k2.2	protein_coding
ENSDARG00000004459	9.2044	9.31481e-05	0.00104679	unc119.2	protein_coding
ENSDARG00000035514	9.02938	4.39711e-05	0.000580225	adam28	protein_coding
ENSDARG00000090873	9.00026	1.32308e-26	1.42814e-23	ccl34a.4	protein_coding
ENSDARG00000077975	8.96319	2.36509e-05	0.000351394	si:ch73-343l4.8	protein_coding
ENSDARG00000056166	8.84893	2.43072e-09	1.44957e-07	jac2	protein_coding
ENSDARG00000093124	8.80656	0.000395822	0.00325152	scpp8	protein_coding
ENSDARG00000057911	8.76775	0.000141296	0.00145646	ACTC1	protein_coding
ENSDARG00000101190	8.69515	2.85034e-05	0.000408693	cyp2k8	protein_coding
ENSDARG00000091926	8.67431	5.31501e-05	0.000676137	si:dkey-103e21.5	protein_coding
ENSDARG00000045224	8.64192	7.7979e-05	0.000908969	glipr1a	protein_coding
ENSDARG00000105096	8.61454	0.000245212	0.00225261	si:ch1073-67j19.1	protein_coding
ENSDARG00000078205	8.53105	0.000352848	0.00298366	ccl34b.9	protein_coding
ENSDARG00000086166	8.52658	8.89715e-05	0.00101144	si:ch211-286b5.9	protein_coding
ENSDARG00000103237	8.46909	0.000581456	0.00436081	si:ch73-299h12.8	protein_coding
ENSDARG00000100582	8.46763	0.000157555	0.00158791	si:ch211-195b11.3	protein_coding
ENSDARG00000069769	8.43956	0.000115187	0.00123899	gig2j	protein_coding
ENSDARG00000099073	8.38256	0.00156335	0.00914316	CU856343.1	protein_coding
ENSDARG00000002204	8.28775	0.000924145	0.00617279	hspb11	protein_coding
ENSDARG00000055550	8.25644	0.000176346	0.0017377	FO834888.1	protein_coding
ENSDARG00000045554	8.21558	0.000158943	0.00160115	snx20	protein_coding
ENSDARG00000104185	8.21114	0.0011936	0.00746665	AL831726.2	protein_coding
ENSDARG00000091996	8.20786	0.000133165	0.00139552	si:ch211-117m20.5	protein_coding
ENSDARG00000033587	8.04776	0.000389071	0.00321073	CABZ01088134.1	protein_coding
ENSDARG00000077239	7.94628	1.79074e-10	1.42651e-08	si:ch211-165i18.2	protein_coding
ENSDARG00000013856	7.89833	0.00355992	0.0168942	amy2a	protein_coding
ENSDARG00000074191	7.85297	0.000870098	0.00588077	zgc:172253	protein_coding
ENSDARG00000091377	7.81732	0.00678583	0.0274279	galn	protein_coding
ENSDARG00000056976	7.7832	0.00304909	0.0150351	ifit16	protein_coding
ENSDARG00000059410	7.75519	0.000960515	0.00635841	ccr12b.1	protein_coding
ENSDARG00000014103	7.71257	0.00161358	0.00936776	dkk1a	protein_coding
ENSDARG00000058631	7.65341	1.1058e-13	1.85055e-11	CABZ01030107.1	protein_coding
ENSDARG00000089706	7.6364	6.12744e-07	1.64322e-05	ANPEP (1 of many)	protein_coding
ENSDARG00000094085	7.59367	0.00196313	0.0108184	CR759846.1	processed_transcript
ENSDARG00000037932	7.57979	0.000309144	0.00269975	lin7b	protein_coding
ENSDARG00000021339	7.56731	0.00201871	0.0110161	cpa5	protein_coding
ENSDARG00000011673	7.54993	0.00109367	0.00701013	si:ch211-246m6.5	protein_coding
ENSDARG00000100339	7.53367	5.86845e-09	3.01638e-07	arf4b	protein_coding
ENSDARG00000055856	7.52955	0.00229362	0.0121562	tor1l1	protein_coding
ENSDARG00000074210	7.50307	0.000741717	0.00524302	ARF4 (1 of many)	protein_coding
ENSDARG00000041382	7.50304	0.00150167	0.00887437	si:dkey-283b15.2	protein_coding
ENSDARG00000043299	7.41945	0.00216279	0.0116116	nmu	protein_coding
ENSDARG00000090340	7.41298	0.0048582	0.0212995	si:dkey-27o4.1	protein_coding
ENSDARG00000042683	7.40824	0.000702087	0.00502708	si:dkey-15j16.3	protein_coding
ENSDARG00000079553	7.37778	0.00184929	0.0103672	cd83	protein_coding
ENSDARG00000035694	7.37195	2.67911e-10	2.04369e-08	stm	protein_coding
ENSDARG00000100442	7.34752	0.00196184	0.010818	cfh	protein_coding
ENSDARG00000095384	7.30735	0.00106724	0.00688332	si:dkey-78l4.2	protein_coding
ENSDARG00000089894	7.28648	0.00066226	0.00480567	zmp:0000001289	protein_coding
ENSDARG00000099401	7.26107	0.00153938	0.00904523	ccl33.3	processed_transcript
ENSDARG00000042138	7.25579	0.000905193	0.0060725	selp	protein_coding
ENSDARG00000086337	7.22711	6.30992e-06	0.000118761	si:dkey-102g19.3	protein_coding
ENSDARG00000083310	7.22402	0.00108329	0.00696218	dre-mir-146a	miRNA
ENSDARG00000071310	7.17208	0.00444818	0.0199558	si:dkey-78l4.5	protein_coding
ENSDARG00000076264	7.16506	0.00899014	0.0339537	zgc:195170	protein_coding
ENSDARG00000097000	7.15535	0.00628289	0.0258451	BX890558.1	lincRNA
ENSDARG00000077169	7.15213	0.0035564	0.0168835	si:ch211-153b23.4	protein_coding
ENSDARG00000112015	7.13212	0.00480948	0.0211504	CR381686.5	protein_coding
ENSDARG00000079216	7.10985	0.00180492	0.0101895	dpep2	protein_coding
ENSDARG00000099672	7.08708	2.21716e-30	4.7864e-27	capgb	protein_coding
ENSDARG00000062009	7.06812	0.00126466	0.00780808	gpr18	protein_coding
ENSDARG00000058557	7.06102	0.00324246	0.0157123	il11b	protein_coding
ENSDARG00000069388	7.00497	0.00136939	0.00826921	tmem88b	protein_coding
ENSDARG00000099728	7.00452	0.00112594	0.00716171	zgc:56622	protein_coding
ENSDARG00000070132	7.00277	0.00637345	0.026128	aste1a	protein_coding
ENSDARG00000055365	6.98974	5.72251e-08	2.11537e-06	si:dkey-25e12.3	protein_coding
ENSDARG00000045999	6.94856	0.00547307	0.0233009	saa	protein_coding
ENSDARG00000114451	6.9074	0.00083426	0.00570298	mmp13a	protein_coding
ENSDARG00000104380	6.87503	0.0130885	0.0448216	si:dkey-238k10.2	protein_coding
ENSDARG00000075926	6.85446	0.00445329	0.01997	igfn1.2	protein_coding
ENSDARG00000055374	6.83287	0.00539831	0.0230815	irf4b	protein_coding
ENSDARG00000077337	6.83179	0.00205175	0.0111521	si:ch211-171h4.5	protein_coding
ENSDARG00000096311	6.74269	0.0105392	0.038303	si:dkey-211g8.8	protein_coding
ENSDARG00000078547	6.71341	4.07542e-05	0.000544095	si:ch211-264f5.2	protein_coding
ENSDARG00000100899	6.67929	0.000190439	0.00184594	si:ch211-241b2.5	protein_coding
ENSDARG00000006598	6.66825	1.93748e-10	1.5321e-08	sgk2b	protein_coding
ENSDARG00000089079	6.66797	0.00711496	0.0284177	si:ch211-214b16.3	protein_coding
ENSDARG00000112540	6.64589	0.007818	0.0305034	cst14b.2	protein_coding
ENSDARG00000031316	6.63409	0.0113498	0.0405125	six6b	protein_coding
ENSDARG00000104795	6.62551	0.00645555	0.0263894	cxcl8a	protein_coding
ENSDARG00000114454	6.60779	0.0001176	0.00125805	CR762483.1	protein_coding
ENSDARG00000097653	6.58948	0.00029264	0.00258676	si:dkey-23k10.3	protein_coding
ENSDARG00000052958	6.55618	0.000182233	0.00178414	nppb	protein_coding
ENSDARG00000071386	6.55202	0.00435073	0.0195919	si:dkey-78l4.10	protein_coding
ENSDARG00000090352	6.54693	0.000122024	0.00129958	CR855311.1	processed_transcript
ENSDARG00000028027	6.52735	0.0084399	0.032374	trim63a	protein_coding
ENSDARG00000087863	6.52153	0.000568889	0.00429261	cd44a	protein_coding
ENSDARG00000077809	6.51555	2.4795e-10	1.89813e-08	il13	protein_coding
ENSDARG00000098376	6.48321	0.00845913	0.0324304	si:ch211-207l14.1	protein_coding
ENSDARG00000025187	6.46605	0.0117991	0.0416888	six6a	protein_coding
ENSDARG00000102098	6.45414	0.00500354	0.021762	CR954226.1	lincRNA
ENSDARG00000058206	6.44395	9.05281e-08	3.18293e-06	si:ch211-153b23.5	protein_coding
ENSDARG00000100900	6.43144	0.00010645	0.00116416	si:ch211-183d5.2	protein_coding
ENSDARG00000071139	6.43093	2.31344e-08	9.47678e-07	PLCXD1 (1 of many)	protein_coding
ENSDARG00000113820	6.42226	0.00642387	0.0262798	cyp46a1.4	protein_coding
ENSDARG00000105377	6.42159	0.00600674	0.0249445	si:ch211-277c7.6	protein_coding
ENSDARG00000059254	6.39663	0.00871267	0.0331844	illr1	protein_coding
ENSDARG00000102594	6.35673	0.0142637	0.0478365	zgc:194627	protein_coding
ENSDARG00000102271	6.35433	0.00968349	0.0359187	si:dkey-203a12.2	protein_coding
ENSDARG00000109648	6.3388	0.000182103	0.00178369	si:ch211-147m6.1	protein_coding
ENSDARG00000093054	6.33578	0.0037766	0.0176738	BX548073.3	processed_transcript
ENSDARG00000075121	6.31376	2.49515e-18	9.28466e-16	hbegfa	protein_coding
ENSDARG00000040230	6.31331	0.0118866	0.0418738	si:dkey-37m8.11	protein_coding
ENSDARG00000001452	6.29689	1.17764e-12	1.58893e-10	adam8a	protein_coding
ENSDARG00000095807	6.28138	5.38226e-09	2.79981e-07	hp	protein_coding
ENSDARG00000009215	6.27898	0.00644208	0.0263393	zgc:112437	protein_coding
ENSDARG00000093623	6.27071	0.00775588	0.0302829	CR392341.1	processed_transcript
ENSDARG00000104865	6.22416	0.00747807	0.0294969	si:dkey-34d22.5	protein_coding
ENSDARG00000087084	6.20653	5.36692e-05	0.000682338	hcar1-4	protein_coding
ENSDARG00000103862	6.17177	0.00744696	0.0294172	hoxa4a	protein_coding
ENSDARG00000015273	6.17085	0.00954836	0.035546	alpi.1	protein_coding
ENSDARG00000037097	6.15293	0.00259704	0.0133384	slc7a2	protein_coding
ENSDARG00000040668	6.11989	0.00696916	0.0280064	lrrc51	protein_coding
ENSDARG00000099411	6.10664	3.28346e-16	8.33921e-14	zgc:158343	protein_coding
ENSDARG00000093440	6.10129	1.98286e-09	1.21608e-07	tnfaip6	protein_coding
ENSDARG00000077415	6.05474	0.0137553	0.0465729	zmp:0000001175	protein_coding
ENSDARG00000022372	6.04692	4.05947e-07	1.15159e-05	kng1	protein_coding
ENSDARG00000101597	6.04539	0.0112199	0.0402485	si:dkeyp-57d7.4	protein_coding
ENSDARG00000059651	6.02952	0.00835993	0.0321415	cidec	protein_coding
ENSDARG00000002909	6	0.0107065	0.0387558	tjp3	protein_coding
ENSDARG00000080484	5.99911	2.08614e-09	1.2615e-07	dre-mir-21-2	miRNA
ENSDARG00000103750	5.99218	0.00879871	0.0334119	si:ch211-246m6.5	protein_coding
ENSDARG00000099599	5.97366	0.0142512	0.0478156	pigrl2.3	protein_coding
ENSDARG00000057035	5.9595	2.26372e-12	2.84123e-10	stoml3b	protein_coding
ENSDARG00000017299	5.94872	5.44175e-25	4.89486e-22	fabp11a	protein_coding
ENSDARG00000090396	5.94	5.67576e-15	1.1896e-12	si:cabz01074946.1	protein_coding
ENSDARG00000093019	5.93567	2.48163e-07	7.5033e-06	si:dkey-83k24.5	protein_coding
ENSDARG00000079997	5.92735	0.00442436	0.0198696	si:zfos-223e1.2	protein_coding
ENSDARG00000098602	5.88383	6.46093e-05	0.000784469	CABZ01001434.1	protein_coding
ENSDARG00000105521	5.86192	0.000200352	0.00192231	si:ch73-40a2.1	protein_coding
ENSDARG00000097294	5.85849	0.0104899	0.0381753	CU855758.1	antisense
ENSDARG00000087909	5.85058	0.000368574	0.00307925	il4	protein_coding
ENSDARG00000042725	5.82753	1.20283e-20	5.89963e-18	cebpb	protein_coding
ENSDARG00000094534	5.80506	0.00920132	0.0345518	CR786571.2	unprocessed_pseudogene
ENSDARG00000043093	5.75103	0.0140538	0.047309	mpeg1.2	protein_coding
ENSDARG00000042221	5.74928	5.52759e-11	4.93098e-09	mthfd1l	protein_coding
ENSDARG00000110229	5.74523	0.0104273	0.0380179	zgc:173702	protein_coding
ENSDARG00000080775	5.7345	0.0106336	0.0385619	RF00571	snoRNA
ENSDARG00000103037	5.72726	0.00117942	0.0074128	CR848788.1	protein_coding
ENSDARG00000116586	5.71569	9.4969e-05	0.00106338	zgc:92066	protein_coding
ENSDARG00000011434	5.70342	0.0115413	0.0410039	ptger2a	protein_coding
ENSDARG00000056026	5.70267	1.99053e-07	6.22777e-06	tprg1	protein_coding
ENSDARG00000068126	5.68604	3.795e-08	1.47615e-06	nppc	protein_coding
ENSDARG00000010933	5.65484	0.00963132	0.0357744	cacna1fa	protein_coding
ENSDARG00000043182	5.64637	0.00164227	0.00949728	hhla2a.1	protein_coding
ENSDARG00000086998	5.6422	0.00524197	0.0225785	zgc:64002	protein_coding
ENSDARG00000102175	5.63759	0.00163793	0.00947979	hamp	protein_coding
ENSDARG00000032126	5.63008	0.00974087	0.0360742	scg5	protein_coding
ENSDARG00000052376	5.62866	0.012208	0.0426864	b3gnt2a	protein_coding
ENSDARG00000069027	5.58029	0.00136854	0.00826872	admb	protein_coding
ENSDARG00000059883	5.57852	1.93559e-22	1.16071e-19	trpv1	protein_coding
ENSDARG00000075045	5.55552	3.98601e-13	6.01748e-11	cxcl18b	protein_coding
ENSDARG00000033071	5.5544	0.00142357	0.00851538	trim35-10	protein_coding
ENSDARG00000091918	5.55422	0.00281557	0.0141416	BX548073.1	processed_transcript
ENSDARG00000007709	5.52892	2.0053e-09	1.22636e-07	adamts8a	protein_coding
ENSDARG00000074656	5.52505	1.78448e-21	9.17222e-19	ctss2.1	protein_coding
ENSDARG00000014059	5.5111	9.35513e-13	1.29461e-10	cldn5b	protein_coding
ENSDARG00000095393	5.49795	0.0146687	0.0489213	CR376741.1	processed_transcript
ENSDARG00000113294	5.49515	0.0130788	0.0447955	znf1146	protein_coding
ENSDARG00000093877	5.48887	0.00107038	0.00689566	MFAP4 (1 of many)	protein_coding
ENSDARG00000024365	5.46809	1.29634e-14	2.66528e-12	crlf1a	protein_coding
ENSDARG00000078244	5.41924	1.66372e-12	2.15068e-10	si:ch211-197l9.2	protein_coding
ENSDARG00000117679	5.367	0.0028821	0.0144027	BX548073.14	lincRNA
ENSDARG00000079315	5.35592	1.05181e-05	0.000181217	lpxn	protein_coding
ENSDARG00000079637	5.32199	0.0042913	0.0194053	alpk2	protein_coding
ENSDARG00000059294	5.30925	1.84063e-32	4.96694e-29	marco	protein_coding
ENSDARG00000090730	5.29794	1.81384e-08	7.69294e-07	cfbl	protein_coding
ENSDARG00000057949	5.26653	9.4652e-19	3.85537e-16	slc43a3b	protein_coding
ENSDARG00000078468	5.21592	9.45082e-06	0.00016547	fap	protein_coding
ENSDARG00000091734	5.21035	2.94188e-05	0.00041948	traf3ip2l	protein_coding
ENSDARG00000008182	5.19571	0.00162678	0.0094208	si:ch73-111e15.1	protein_coding
ENSDARG00000078363	5.18912	0.00794325	0.0308748	mcoln3a	protein_coding
ENSDARG00000053868	5.16548	1.35875e-07	4.47145e-06	etv2	protein_coding
ENSDARG00000071251	5.14795	4.5411e-14	8.30791e-12	ppp1r18	protein_coding
ENSDARG00000104472	5.14794	1.78117e-26	1.83104e-23	si:ch211-39i2.2	antisense
ENSDARG00000055226	5.13756	1.42847e-36	1.54189e-32	slc7a7	protein_coding
ENSDARG00000017504	5.13212	4.66943e-13	6.85739e-11	si:ch211-1o7.3	protein_coding
ENSDARG00000044612	5.12943	1.35177e-14	2.75301e-12	c1qb	protein_coding
ENSDARG00000011259	5.12807	0.0075481	0.0296818	trpm1a	protein_coding
ENSDARG00000053215	5.09014	1.11084e-11	1.19308e-09	me1	protein_coding
ENSDARG00000025757	5.0895	9.23512e-07	2.34175e-05	tspan35	protein_coding
ENSDARG00000069735	5.08579	1.01983e-07	3.5339e-06	hbaa2	protein_coding
ENSDARG00000075730	5.08157	0.0033814	0.0162109	dnph1	protein_coding
ENSDARG00000090444	5.03764	1.37305e-16	3.70519e-14	ponzr1	protein_coding
ENSDARG00000025254	5.00195	4.60434e-16	1.12953e-13	s100a10b	protein_coding
ENSDARG00000039863	4.99996	5.7476e-10	3.9769e-08	lifrb	protein_coding
ENSDARG00000057121	4.98696	3.67833e-11	3.4828e-09	BX511186.1	protein_coding
ENSDARG00000075265	4.97919	0.00275407	0.0139174	plaua	protein_coding
ENSDARG00000102929	4.97399	1.26652e-07	4.20641e-06	zgc:101715	protein_coding
ENSDARG00000089404	4.97373	5.60303e-08	2.07832e-06	si:dkey-24p1.7	protein_coding
ENSDARG00000101749	4.97219	3.35628e-09	1.88686e-07	zgc:92161	protein_coding
ENSDARG00000067847	4.96682	0.00349249	0.0166363	il21	protein_coding
ENSDARG00000058731	4.96621	1.6188e-08	7.03152e-07	slc2a6	protein_coding
ENSDARG00000037873	4.95921	0.000935557	0.00622397	cyp3c3	protein_coding
ENSDARG00000093748	4.94733	0.00536598	0.022966	si:ch211-217k17.11	protein_coding
ENSDARG00000094854	4.94582	1.34705e-16	3.68104e-14	ms4a17a.8	protein_coding
ENSDARG00000080201	4.94461	0.00527742	0.0226815	RF00001	rRNA
ENSDARG00000078206	4.94188	0.00291423	0.0145194	zgc:171506	protein_coding
ENSDARG00000101206	4.93715	2.33399e-10	1.7931e-08	zgc:113363	protein_coding
ENSDARG00000096304	4.91739	5.08584e-05	0.000651978	btr31	protein_coding
ENSDARG00000093156	4.91418	0.00585944	0.0244915	si:ch73-21g5.7	protein_coding
ENSDARG00000104801	4.91321	4.23194e-17	1.25149e-14	tubb6	protein_coding
ENSDARG00000023526	4.90626	0.000176442	0.0017377	ggt1a	protein_coding
ENSDARG00000044613	4.90358	4.48069e-12	5.34415e-10	c1qa	protein_coding
ENSDARG00000074782	4.87684	3.79547e-23	2.73122e-20	adgrg3	protein_coding
ENSDARG00000099819	4.87441	0.000434213	0.00348339	sb:cb1058	protein_coding
ENSDARG00000026787	4.86863	6.79488e-05	0.000815946	aqp7	protein_coding
ENSDARG00000014427	4.86641	0.000793403	0.00549855	mxe	protein_coding
ENSDARG00000113503	4.86534	0.0065441	0.0266907	CU459094.2	protein_coding
ENSDARG00000038878	4.84748	0.0039997	0.0184067	il12a	protein_coding
ENSDARG00000114030	4.84556	1.36115e-06	3.26196e-05	CR759843.2	protein_coding
ENSDARG00000062974	4.83794	2.12611e-07	6.57571e-06	itga2.2	protein_coding
ENSDARG00000090783	4.81505	0.000391498	0.00322214	mfap4	protein_coding
ENSDARG00000078211	4.8074	0.00534451	0.0228923	espnla	protein_coding
ENSDARG00000036337	4.79174	0.00388583	0.0180558	cers3b	protein_coding
ENSDARG00000036942	4.78413	2.51674e-14	4.85102e-12	gpd1c	protein_coding
ENSDARG00000076106	4.78393	3.63691e-05	0.000495979	ftr43	protein_coding
ENSDARG00000057644	4.77733	6.99459e-27	8.38885e-24	adam8b	protein_coding
ENSDARG00000038010	4.77574	3.74285e-33	1.34668e-29	rac2	protein_coding
ENSDARG00000040295	4.77443	1.39376e-15	3.1019e-13	apoeb	protein_coding
ENSDARG00000063162	4.76517	0.00406807	0.0186418	cmtm8b	protein_coding
ENSDARG00000076320	4.75962	2.09196e-05	0.000316477	ano9a	protein_coding
ENSDARG00000041980	4.74517	5.71126e-10	3.96446e-08	calhm6	protein_coding
ENSDARG00000041828	4.73933	2.06043e-05	0.000313244	si:dkeyp-28d2.4	protein_coding
ENSDARG00000101181	4.73435	0.0101965	0.0373658	s100w	protein_coding
ENSDARG00000100952	4.71129	0.00029273	0.00258676	wu:fj16a03	protein_coding
ENSDARG00000097106	4.71012	0.00267473	0.0136399	CR790366.2	processed_transcript
ENSDARG00000071636	4.70463	1.87323e-06	4.27025e-05	BX511034.2	protein_coding
ENSDARG00000101482	4.70233	9.44915e-35	5.09971e-31	hk2	protein_coding
ENSDARG00000079267	4.69675	1.19338e-22	7.8069e-20	FERMT3 (1 of many)	protein_coding
ENSDARG00000036376	4.68719	8.71061e-08	3.07263e-06	cldn7a	protein_coding
ENSDARG00000108953	4.67618	4.10878e-12	4.98316e-10	si:ch211-283g2.2	protein_coding
ENSDARG00000044125	4.66348	3.07855e-23	2.29171e-20	txn	protein_coding
ENSDARG00000013477	4.66271	9.92357e-05	0.00110371	gata1a	protein_coding
ENSDARG00000055395	4.66171	0.00708205	0.0283282	foxq1b	protein_coding
ENSDARG00000103285	4.6611	0.000216788	0.00204546	si:dkey-167k11.5	protein_coding
ENSDARG00000102583	4.64912	1.25247e-08	5.71352e-07	il4r.2	protein_coding
ENSDARG00000006544	4.62234	5.72547e-05	0.000715286	c1qtnf6b	protein_coding
ENSDARG00000100904	4.59588	1.85749e-05	0.00028742	CABZ01109021.1	protein_coding
ENSDARG00000039490	4.58867	1.67777e-05	0.000265152	pitpnaa	protein_coding
ENSDARG00000040076	4.58691	1.50174e-08	6.576e-07	pycard	protein_coding
ENSDARG00000063295	4.58288	7.53142e-09	3.7036e-07	myh9a	protein_coding
ENSDARG00000054837	4.57841	6.28622e-12	7.21845e-10	zgc:136870	protein_coding
ENSDARG00000054543	4.57047	4.49571e-28	6.47023e-25	samsn1a	protein_coding
ENSDARG00000076789	4.56379	1.94965e-24	1.61881e-21	cx32.2	protein_coding
ENSDARG00000055439	4.55944	5.75518e-18	2.00392e-15	adamtsl7	protein_coding
ENSDARG00000086374	4.55861	7.0248e-11	6.16469e-09	isg15	protein_coding
ENSDARG00000015559	4.5578	6.25772e-07	1.674e-05	fstl1a	protein_coding
ENSDARG00000091234	4.55263	3.24963e-14	6.10027e-12	si:ch73-335l21.4	protein_coding
ENSDARG00000101785	4.54492	5.72734e-24	4.57933e-21	laptm5	protein_coding
ENSDARG00000096037	4.54492	0.000174567	0.00172316	si:ch211-214j24.14	protein_coding
ENSDARG00000105665	4.52942	0.00530568	0.0227621	FO704741.1	lincRNA
ENSDARG00000105621	4.52885	0.0131077	0.044873	BX571811.1	lincRNA
ENSDARG00000026611	4.52516	1.31444e-24	1.13504e-21	socs3b	protein_coding
ENSDARG00000092176	4.51814	0.0114083	0.0406878	BX321875.1	processed_transcript
ENSDARG00000100199	4.50936	0.000131495	0.00138271	si:ch1073-185p12.2	protein_coding
ENSDARG00000068657	4.50302	0.0095043	0.0354245	irgq2	protein_coding
ENSDARG00000010962	4.50284	1.27289e-06	3.08216e-05	fkbp7	protein_coding
ENSDARG00000055504	4.49793	2.03925e-30	4.7864e-27	si:ch211-212k18.7	protein_coding
ENSDARG00000097320	4.48878	2.6526e-09	1.54687e-07	CR848791.3	lincRNA
ENSDARG00000069734	4.48391	1.69187e-08	7.29022e-07	hbba2	protein_coding
ENSDARG00000095627	4.48364	3.07414e-16	7.90055e-14	c1qc	protein_coding
ENSDARG00000016999	4.48307	1.25391e-17	4.04021e-15	lin28a	protein_coding
ENSDARG00000032849	4.48039	5.88298e-06	0.000111601	ndrg1a	protein_coding
ENSDARG00000013598	4.47848	0.00141924	0.00849652	tnfb	protein_coding
ENSDARG00000076534	4.47827	7.21887e-05	0.00085486	si:ch211-14a17.10	protein_coding
ENSDARG00000098570	4.47481	0.00890982	0.0337152	si:ch211-8c17.2	protein_coding
ENSDARG00000101794	4.46529	5.16856e-21	2.59486e-18	atp6v0e1	protein_coding
ENSDARG00000092191	4.46228	0.00410484	0.0187704	CR318588.1	processed_transcript
ENSDARG00000053568	4.45716	3.50557e-07	1.01174e-05	pstpip1b	protein_coding
ENSDARG00000069461	4.44183	5.51947e-17	1.61019e-14	rnaseka	protein_coding
ENSDARG00000043081	4.42765	1.33749e-15	3.00768e-13	ctsz	protein_coding
ENSDARG00000069839	4.42611	0.00687802	0.0277175	CU571382.1	lincRNA
ENSDARG00000086838	4.42333	0.000202778	0.001943	itga2.3	protein_coding
ENSDARG00000098774	4.42243	1.0975e-07	3.72528e-06	si:zfos-741a10.3	protein_coding
ENSDARG00000003808	4.41208	0.00130424	0.00797498	aqp3a	protein_coding
ENSDARG00000093532	4.40709	0.00464415	0.0206165	si:dkey-230i18.2	protein_coding
ENSDARG00000088612	4.40525	4.92003e-06	9.57742e-05	si:ch211-153b23.7	protein_coding
ENSDARG00000042428	4.40066	0.00181907	0.0102426	gstt1a	protein_coding
ENSDARG00000087544	4.37504	0.0107962	0.0390335	BX510934.1	protein_coding
ENSDARG00000077618	4.36188	2.5375e-18	9.28466e-16	rin3	protein_coding
ENSDARG00000006603	4.34871	1.96463e-12	2.49485e-10	csrp1a	protein_coding
ENSDARG00000039065	4.34863	2.08078e-10	1.62165e-08	trpc2a	protein_coding
ENSDARG00000042722	4.34772	2.04982e-16	5.39652e-14	blnk	protein_coding
ENSDARG00000115038	4.34211	4.13378e-05	0.000550525	si:dkey-4c23.5	protein_coding
ENSDARG00000073998	4.34204	0.00995055	0.0366795	si:ch211-23l10.3	protein_coding
ENSDARG00000025903	4.33751	1.23415e-22	7.83611e-20	lgals9l1	protein_coding
ENSDARG00000094098	4.32521	4.86652e-05	0.000628715	si:ch211-278p9.3	protein_coding
ENSDARG00000045661	4.3193	0.000105109	0.00115124	irf7	protein_coding
ENSDARG00000009844	4.31841	0.00199695	0.01095	dusp23a	protein_coding
ENSDARG00000093317	4.31246	0.0120744	0.0423498	si:ch211-209j10.6	protein_coding
ENSDARG00000095005	4.31003	0.000776403	0.00541201	si:dkey-21e2.10	protein_coding
ENSDARG00000020084	4.28723	1.19869e-05	0.000201536	tg	protein_coding
ENSDARG00000093214	4.28304	0.0123833	0.0431243	si:ch211-284e13.9	protein_coding
ENSDARG00000086569	4.26414	0.000606892	0.00451001	zgc:172051	protein_coding
ENSDARG00000075818	4.26133	1.04018e-07	3.57386e-06	dok2	protein_coding
ENSDARG00000043126	4.25932	0.0100857	0.0370288	blf	protein_coding
ENSDARG00000053500	4.24897	1.49475e-07	4.84514e-06	cbsa	protein_coding
ENSDARG00000073876	4.24032	7.7936e-05	0.000908969	si:ch1073-165f9.2	protein_coding
ENSDARG00000027529	4.23985	8.04468e-12	8.86064e-10	hmox1a	protein_coding
ENSDARG00000115528	4.23032	0.00877635	0.0333739	FO082780.1	protein_coding
ENSDARG00000068409	4.23018	0.000361687	0.00304255	vgll4l	protein_coding
ENSDARG00000044795	4.22559	0.000313438	0.00272843	entpd2b	protein_coding
ENSDARG00000058964	4.21765	1.98029e-06	4.47649e-05	themis2	protein_coding
ENSDARG00000117384	4.21379	4.57973e-07	1.27931e-05	CABZ01084575.1	lincRNA
ENSDARG00000030250	4.20941	0.00114109	0.00722614	dennd2db	protein_coding
ENSDARG00000067848	4.2072	0.00794956	0.0308882	nmrk2	protein_coding
ENSDARG00000038668	4.20615	1.83469e-11	1.86827e-09	gbp1	protein_coding
ENSDARG00000028106	4.18935	1.0413e-09	6.79143e-08	glrx	protein_coding
ENSDARG00000086703	4.18564	1.7506e-21	9.17222e-19	si:dkey-126g1.7	protein_coding
ENSDARG00000053027	4.18211	1.20891e-17	3.95425e-15	si:dkey-33i11.1	protein_coding
ENSDARG00000091411	4.18099	0.000637475	0.00467686	si:ch211-214p13.9	protein_coding
ENSDARG00000024540	4.18073	6.11291e-14	1.07289e-11	tspan36	protein_coding
ENSDARG00000094935	4.16743	0.000219733	0.00206423	si:dkey-58f10.11	protein_coding
ENSDARG00000068233	4.16705	3.24832e-33	1.34668e-29	zgc:64051	protein_coding
ENSDARG00000094210	4.16541	5.76238e-05	0.000719066	zgc:109934	protein_coding
ENSDARG00000010729	4.16387	8.48925e-06	0.000151585	CABZ01073795.1	protein_coding
ENSDARG00000026726	4.16017	2.27265e-10	1.75221e-08	anxa1a	protein_coding
ENSDARG00000027063	4.15482	2.10997e-27	2.67942e-24	arpc1b	protein_coding
ENSDARG00000061717	4.15335	0.00201325	0.0110003	cytip	protein_coding
ENSDARG00000045453	4.14488	0.00125145	0.00775437	f13a1a.1	protein_coding
ENSDARG00000105578	4.14115	0.000488154	0.00380031	amfrb	protein_coding
ENSDARG00000010317	4.11607	6.88812e-08	2.49498e-06	gpr183a	protein_coding
ENSDARG00000028618	4.11408	1.84349e-29	3.31644e-26	zgc:77517	protein_coding
ENSDARG00000105782	4.11313	0.00279824	0.0140747	CABZ01081777.1	protein_coding
ENSDARG00000018404	4.10951	2.66843e-12	3.32983e-10	krt18	protein_coding
ENSDARG00000101050	4.1007	1.18814e-08	5.469e-07	tmc8	protein_coding
ENSDARG00000089838	4.0984	4.11841e-10	2.9636e-08	si:dkey-262k9.4	protein_coding
ENSDARG00000109580	4.09736	0.014842	0.0493209	taar19n	protein_coding
ENSDARG00000007769	4.0833	7.06298e-06	0.000130168	sult5a1	protein_coding
ENSDARG00000000767	4.07497	1.22977e-20	5.89963e-18	spi1b	protein_coding
ENSDARG00000044039	4.07357	4.86755e-13	7.10005e-11	stx11a	protein_coding
ENSDARG00000098377	4.07265	1.47486e-12	1.94142e-10	tnfrsf11b	protein_coding
ENSDARG00000015123	4.06809	0.00797135	0.0309562	dnase1l4.1	protein_coding
ENSDARG00000002494	4.06572	5.40882e-05	0.000686453	itgb6	protein_coding
ENSDARG00000009978	4.06056	1.5662e-11	1.62554e-09	icn	protein_coding
ENSDARG00000078247	4.05919	0.0130751	0.0447898	vip	protein_coding
ENSDARG00000078389	4.04535	4.69121e-06	9.24875e-05	si:dkey-188i13.7	protein_coding
ENSDARG00000088251	4.0356	0.000479916	0.00375514	si:ch211-24o10.6	protein_coding
ENSDARG00000040917	4.02148	1.31968e-21	7.34893e-19	cbfb	protein_coding
ENSDARG00000088091	4.01888	3.67647e-28	5.66911e-25	pfn1	protein_coding
ENSDARG00000097082	4.01659	9.47579e-08	3.31009e-06	im:7152348	protein_coding
ENSDARG00000001993	4.01174	5.23447e-08	1.96525e-06	myhb	protein_coding
ENSDARG00000092364	4.01139	5.093e-08	1.92216e-06	si:ch211-218c6.8	protein_coding
ENSDARG00000006901	3.99601	0.00160748	0.00934618	si:ch1073-459j12.1	protein_coding
ENSDARG00000117263	3.99525	1.157e-06	2.8351e-05	CABZ01056054.1	lincRNA
ENSDARG00000079544	3.99029	0.00405354	0.018591	si:ch1073-464p5.5	protein_coding
ENSDARG00000041041	3.98997	3.73756e-17	1.12064e-14	cxcr3.2	protein_coding
ENSDARG00000077309	3.9862	1.59163e-06	3.73073e-05	si:ch211-209f23.6	protein_coding
ENSDARG00000025403	3.98079	8.99875e-05	0.0010203	ftr83	protein_coding
ENSDARG00000104976	3.97955	0.00169796	0.00973846	si:ch1073-67j19.2	protein_coding
ENSDARG00000079829	3.95436	0.00590044	0.0246237	BX537113.1	protein_coding
ENSDARG00000045153	3.94533	0.00219708	0.0117396	slc16a8	protein_coding
ENSDARG00000021688	3.93954	0.000914495	0.00611211	mxa	protein_coding
ENSDARG00000014499	3.93649	3.04328e-11	2.97278e-09	nutf2l	protein_coding
ENSDARG00000071437	3.93415	7.09369e-16	1.68284e-13	ptprc	protein_coding
ENSDARG00000090401	3.93071	1.40897e-07	4.60863e-06	CABZ01020840.1	protein_coding
ENSDARG00000101479	3.93013	0.00072486	0.00514915	BX908782.2	protein_coding
ENSDARG00000042708	3.92908	7.39574e-39	1.59659e-34	tuba8l	protein_coding
ENSDARG00000055120	3.92838	5.36562e-11	4.84657e-09	ctsba	protein_coding
ENSDARG00000076586	3.92345	1.66991e-09	1.03592e-07	csf2rb	protein_coding
ENSDARG00000058647	3.92061	4.6144e-20	2.07533e-17	hck	protein_coding
ENSDARG00000097470	3.92058	0.000458281	0.00363861	FP015862.2	processed_transcript
ENSDARG00000015623	3.90793	7.51828e-11	6.54454e-09	ada2b	protein_coding
ENSDARG00000070668	3.8991	0.00828222	0.0319165	cd4-1	protein_coding
ENSDARG00000030938	3.89498	3.02313e-09	1.73112e-07	fermt3b	protein_coding
ENSDARG00000037307	3.87496	2.27456e-14	4.46393e-12	gnpda1	protein_coding
ENSDARG00000074846	3.85756	5.61659e-13	8.13765e-11	si:dkeyp-68b7.12	protein_coding
ENSDARG00000042927	3.85262	1.60557e-22	9.90315e-20	mapre1a	protein_coding
ENSDARG00000045957	3.8507	0.00495322	0.0216021	gpr65	protein_coding
ENSDARG00000037892	3.84969	0.00273873	0.0138593	psmc3ip	protein_coding
ENSDARG00000037408	3.84835	2.19815e-05	0.000330688	tbc1d10c	protein_coding
ENSDARG00000044752	3.8469	0.00104127	0.00676261	p2rx4a	protein_coding
ENSDARG00000031136	3.84091	4.07242e-05	0.000544031	moxd1	protein_coding
ENSDARG00000046148	3.83932	0.000146833	0.00150016	tnfaip8l2b	protein_coding
ENSDARG00000007715	3.83523	1.22755e-11	1.30543e-09	lgsn	protein_coding
ENSDARG00000039852	3.83471	0.00410066	0.0187553	ftr93	protein_coding
ENSDARG00000062467	3.82889	1.70003e-05	0.000267885	stra6l	protein_coding
ENSDARG00000074818	3.8278	0.00678807	0.0274288	si:cabz01036022.1	protein_coding
ENSDARG00000018048	3.82266	2.96826e-06	6.33816e-05	zgc:171704	protein_coding
ENSDARG00000016161	3.81575	0.00453029	0.0202358	ccdc170	protein_coding
ENSDARG00000022841	3.80502	4.58081e-07	1.27931e-05	ptk2ba	protein_coding
ENSDARG00000092903	3.80339	2.36729e-05	0.000351439	zgc:153317	protein_coding
ENSDARG00000097815	3.79949	1.84164e-05	0.000285408	CU928129.1	lincRNA
ENSDARG00000098711	3.79292	0.00919018	0.034534	CABZ01078350.1	lincRNA
ENSDARG00000094206	3.79151	0.0119849	0.0421333	si:ch73-191k20.3	protein_coding
ENSDARG00000054610	3.78914	3.57283e-30	7.01183e-27	coro1a	protein_coding
ENSDARG00000096576	3.78532	0.00111643	0.00711586	si:ch211-286b5.6	protein_coding
ENSDARG00000002165	3.78332	1.94134e-25	1.82216e-22	psme1	protein_coding
ENSDARG00000040319	3.76812	1.34323e-08	6.02862e-07	CABZ01041494.1	protein_coding
ENSDARG00000095532	3.73843	0.00402971	0.0185053	si:dkey-58f10.13	protein_coding
ENSDARG00000075757	3.72631	0.00219637	0.0117394	gig2e	protein_coding
ENSDARG00000045190	3.70786	9.16012e-09	4.38467e-07	ch25h	protein_coding
ENSDARG00000102758	3.70372	9.93397e-05	0.0011043	FO704661.1	protein_coding
ENSDARG00000055186	3.70147	2.46822e-06	5.40405e-05	ccr9a	protein_coding
ENSDARG00000071113	3.70124	1.40869e-09	8.89208e-08	xirp2a	protein_coding
ENSDARG00000036893	3.70054	3.02244e-13	4.62754e-11	f13a1b	protein_coding
ENSDARG00000098191	3.6936	1.25399e-06	3.05199e-05	si:dkey-16l2.20	protein_coding
ENSDARG00000004433	3.69227	3.79894e-15	8.20115e-13	btk	protein_coding
ENSDARG00000009123	3.67931	0.000172523	0.0017108	sele	protein_coding
ENSDARG00000020031	3.67621	0.00392134	0.0181622	cldn11a	protein_coding
ENSDARG00000070578	3.67456	0.00384357	0.0179173	edn2	protein_coding
ENSDARG00000004954	3.66518	4.20446e-09	2.3037e-07	grna	protein_coding
ENSDARG00000075984	3.66329	0.00759772	0.029838	hsbp1l1	protein_coding
ENSDARG00000079903	3.65065	0.00569771	0.0239792	si:ch73-343l4.2	protein_coding
ENSDARG00000045367	3.64876	1.82824e-06	4.18981e-05	tuba1b	protein_coding
ENSDARG00000017489	3.64481	0.000147768	0.00150686	zgc:123068	protein_coding
ENSDARG00000038424	3.64253	2.81823e-09	1.61808e-07	C4B	protein_coding
ENSDARG00000093360	3.64	0.00395601	0.0182757	CU469531.2	unprocessed_pseudogene
ENSDARG00000014329	3.63433	1.17482e-22	7.8069e-20	npm1a	protein_coding
ENSDARG00000031246	3.63422	8.77583e-14	1.50359e-11	hbegfb	protein_coding
ENSDARG00000097886	3.63079	0.000719513	0.00512128	CU104777.1	lincRNA
ENSDARG00000096331	3.62641	4.46941e-05	0.000586896	si:ch73-248e21.7	protein_coding
ENSDARG00000013926	3.61719	9.59334e-06	0.000167557	slc16a9a	protein_coding
ENSDARG00000098918	3.61654	0.00707002	0.0283063	mcoln2	protein_coding
ENSDARG00000075866	3.60367	0.00874216	0.0332597	cdcp2	protein_coding
ENSDARG00000051876	3.59816	0.00284407	0.0142574	ush1c	protein_coding
ENSDARG00000027345	3.593	2.81003e-20	1.2907e-17	mpzl2b	protein_coding
ENSDARG00000010482	3.5929	0.00431359	0.0194697	prg4a	protein_coding
ENSDARG00000099448	3.58995	6.71096e-06	0.000124815	sh3d21	protein_coding
ENSDARG00000077473	3.5892	2.20778e-22	1.28815e-19	mych	protein_coding
ENSDARG00000094473	3.58142	0.00103781	0.0067442	si:dkey-163f12.6	protein_coding
ENSDARG00000017653	3.57702	1.22854e-08	5.63095e-07	rgs13	protein_coding
ENSDARG00000079808	3.57505	0.000307112	0.00268745	si:ch73-208g10.1	protein_coding
ENSDARG00000098097	3.57231	0.00486937	0.0213312	jac3	protein_coding
ENSDARG00000074547	3.56549	0.0101551	0.0372456	si:ch211-240l19.8	protein_coding
ENSDARG00000098929	3.54408	8.93867e-10	5.91927e-08	tex15	protein_coding
ENSDARG00000041060	3.54348	1.24348e-26	1.41285e-23	lgals9l3	protein_coding
ENSDARG00000088189	3.53961	0.000329532	0.00283186	si:ch211-135n15.3	protein_coding
ENSDARG00000079802	3.52922	0.000315239	0.00273858	aanat2	protein_coding
ENSDARG00000005481	3.52118	1.60584e-10	1.29839e-08	nfkbiaa	protein_coding
ENSDARG00000094491	3.51978	0.00733698	0.0291177	si:ch211-202m22.1	protein_coding
ENSDARG00000016470	3.51905	1.27207e-13	2.09629e-11	anxa5b	protein_coding
ENSDARG00000043586	3.51362	0.00011589	0.00124407	fas	protein_coding
ENSDARG00000051857	3.50903	4.29004e-12	5.14519e-10	tes	protein_coding
ENSDARG00000092480	3.50809	0.00994746	0.0366773	vegfbb	protein_coding
ENSDARG00000003216	3.49931	9.76481e-19	3.90375e-16	anxa2a	protein_coding
ENSDARG00000102972	3.49311	0.00195315	0.0107866	CABZ01075125.1	protein_coding
ENSDARG00000091712	3.49236	0.00164502	0.0095081	si:dkey-238d18.5	protein_coding
ENSDARG00000056985	3.4902	4.33069e-09	2.35104e-07	tpte	protein_coding
ENSDARG00000015263	3.49005	2.57948e-07	7.74934e-06	adma	protein_coding
ENSDARG00000018025	3.48864	0.00313832	0.0153301	tbx2a	protein_coding
ENSDARG00000045003	3.48167	0.00035709	0.00301245	plvapb	protein_coding
ENSDARG00000057706	3.47765	1.75203e-10	1.40085e-08	si:ch211-137i24.10	protein_coding
ENSDARG00000086903	3.47734	4.3094e-07	1.21451e-05	gig2o	protein_coding
ENSDARG00000112527	3.46853	1.94848e-08	8.13306e-07	FP325130.1	protein_coding
ENSDARG00000001782	3.46577	0.000773304	0.00540437	prkacba	protein_coding
ENSDARG00000053481	3.46301	0.00133107	0.00810025	entpd5a	protein_coding
ENSDARG00000099138	3.46259	0.0124115	0.043195	btr29	protein_coding
ENSDARG00000070542	3.46136	3.43907e-16	8.61332e-14	mafbb	protein_coding
ENSDARG00000096081	3.4596	0.00562372	0.0237816	LRRC56	protein_coding
ENSDARG00000055955	3.45904	7.25654e-12	8.20179e-10	lcp2a	protein_coding
ENSDARG00000042816	3.45793	1.12341e-07	3.79576e-06	mmp9	protein_coding
ENSDARG00000074322	3.45603	0.00642299	0.0262798	si:ch211-147m6.2	protein_coding
ENSDARG00000079387	3.45432	2.12045e-13	3.29325e-11	si:ch211-102c2.4	protein_coding
ENSDARG00000104329	3.45335	0.00361133	0.0170855	si:ch73-281k2.5	protein_coding
ENSDARG00000071361	3.453	0.000165038	0.00165482	si:ch211-197g15.10	protein_coding
ENSDARG00000030954	3.45173	0.0039946	0.0183949	ftr56	protein_coding
ENSDARG00000040717	3.44566	4.88702e-10	3.46171e-08	macc1	protein_coding
ENSDARG00000052396	3.43509	1.82355e-06	4.18797e-05	pkz	protein_coding
ENSDARG00000108340	3.43509	6.10857e-08	2.23891e-06	si:ch211-283g2.2	protein_coding
ENSDARG00000102762	3.42633	6.49634e-13	9.28762e-11	pik3r5	protein_coding
ENSDARG00000071377	3.42242	0.00843131	0.0323467	hsd11b1la	protein_coding
ENSDARG00000087198	3.42138	0.00734905	0.0291371	cthrc1a	protein_coding
ENSDARG00000098761	3.42071	1.8953e-14	3.75374e-12	rgs2	protein_coding
ENSDARG00000026236	3.4194	0.00728918	0.0289696	zgc:56585	protein_coding
ENSDARG00000078101	3.4163	0.00695157	0.0279513	nlrc9	protein_coding
ENSDARG00000020929	3.41607	3.97786e-13	6.01748e-11	fam49ba	protein_coding
ENSDARG00000113519	3.41446	0.00252285	0.013042	BX088712.2	protein_coding
ENSDARG00000005565	3.41347	2.75145e-05	0.00039754	entpd8	protein_coding
ENSDARG00000077746	3.41297	0.00272306	0.0138055	AL935199.1	protein_coding
ENSDARG00000052846	3.40911	0.00414482	0.0189132	fsta	protein_coding
ENSDARG00000071208	3.40563	0.00109489	0.0070159	wnt4a	protein_coding
ENSDARG00000103340	3.40208	3.24631e-19	1.40163e-16	clic1	protein_coding
ENSDARG00000016188	3.3964	2.80927e-16	7.30682e-14	si:ch73-63e15.2	protein_coding
ENSDARG00000061710	3.39629	1.84953e-05	0.000286425	map3k8	protein_coding
ENSDARG00000068939	3.39452	4.98405e-06	9.68458e-05	xaf1	protein_coding
ENSDARG00000093074	3.39427	3.12872e-06	6.64791e-05	si:ch211-139g16.8	protein_coding
ENSDARG00000045815	3.3936	0.00176036	0.0100165	mcm10	protein_coding
ENSDARG00000087736	3.39224	7.56882e-05	0.000886094	si:dkey-118k5.3	protein_coding
ENSDARG00000063539	3.39164	6.87783e-10	4.6545e-08	slc25a15a	protein_coding
ENSDARG00000079826	3.3903	0.000461403	0.00365399	gpr174	protein_coding
ENSDARG00000053493	3.38641	0.00118189	0.00741921	aldh1a2	protein_coding
ENSDARG00000000906	3.38207	7.92178e-12	8.80843e-10	skap2	protein_coding
ENSDARG00000093303	3.38059	3.86251e-06	7.8664e-05	ifitm1	protein_coding
ENSDARG00000011571	3.37217	0.00712414	0.0284439	calcrlb	protein_coding
ENSDARG00000105481	3.37131	1.48978e-07	4.83629e-06	si:ch211-243a20.4	protein_coding
ENSDARG00000062355	3.36499	0.00132886	0.00809238	axdnd1	protein_coding
ENSDARG00000033971	3.3607	0.000272211	0.00245058	prrx1a	protein_coding
ENSDARG00000041644	3.36027	0.0145322	0.0485412	si:dkey-194e6.1	protein_coding
ENSDARG00000055276	3.35977	8.94953e-11	7.63646e-09	rel	protein_coding
ENSDARG00000076182	3.35659	0.00151201	0.00892814	stat1b	protein_coding
ENSDARG00000116052	3.34498	2.99115e-07	8.78542e-06	il4r.1	protein_coding
ENSDARG00000117145	3.34027	0.000186305	0.00181742	notum1b	protein_coding
ENSDARG00000045066	3.33945	1.67246e-21	9.02626e-19	entpd1	protein_coding
ENSDARG00000096147	3.33447	2.13849e-05	0.000322837	BX465862.4	lincRNA
ENSDARG00000092035	3.326	7.08101e-08	2.56055e-06	si:ch211-156j16.1	protein_coding
ENSDARG00000040178	3.32157	8.12716e-18	2.74139e-15	havcr1	protein_coding
ENSDARG00000102555	3.31938	0.0135433	0.0460427	si:dkey-33i11.9	protein_coding
ENSDARG00000097847	3.31819	3.70687e-05	0.000503612	si:ch211-269k10.4	protein_coding
ENSDARG00000026070	3.31351	1.8228e-06	4.18797e-05	cd82b	protein_coding
ENSDARG00000097595	3.31335	0.00108644	0.00697833	BX682556.1	lincRNA
ENSDARG00000101017	3.30519	0.000267195	0.00241448	CT583642.1	protein_coding
ENSDARG00000092170	3.30418	6.27801e-08	2.29711e-06	apoc1	protein_coding
ENSDARG00000042876	3.30265	1.18302e-17	3.92909e-15	abracl	protein_coding
ENSDARG00000091058	3.3025	6.46965e-07	1.72216e-05	tmem173	protein_coding
ENSDARG00000101461	3.30141	0.00389095	0.0180737	emp3b	protein_coding
ENSDARG00000078859	3.29967	0.000321136	0.00278136	g0s2	protein_coding
ENSDARG00000037393	3.2971	1.39876e-05	0.000228242	slc43a1a	protein_coding
ENSDARG00000105232	3.29515	0.00547957	0.0233182	si:ch211-260e23.8	protein_coding
ENSDARG00000105562	3.29425	1.39046e-08	6.20193e-07	si:dkey-23i12.7	protein_coding
ENSDARG00000035198	3.29177	0.00313341	0.0153159	gcnt4a	protein_coding
ENSDARG00000036456	3.29064	3.92326e-15	8.38567e-13	anxa4	protein_coding
ENSDARG00000021938	3.29002	0.000570704	0.00429934	smad9	protein_coding
ENSDARG00000113628	3.28798	0.00888493	0.0336446	RF00001	rRNA
ENSDARG00000092499	3.28691	1.04602e-07	3.58437e-06	si:ch211-183d21.1	protein_coding
ENSDARG00000056407	3.28475	1.52492e-12	1.99515e-10	irf8	protein_coding
ENSDARG00000005414	3.27237	2.80618e-11	2.75362e-09	grapa	protein_coding
ENSDARG00000023963	3.27124	9.52187e-10	6.24797e-08	tpm4a	protein_coding
ENSDARG00000053512	3.26256	0.0109229	0.0393989	crybb2	protein_coding
ENSDARG00000093137	3.25796	0.000112392	0.00121828	BX294189.1	antisense
ENSDARG00000102366	3.25693	1.74753e-05	0.000273573	micall2a	protein_coding
ENSDARG00000035858	3.25347	4.94041e-14	8.8878e-12	cnn2	protein_coding
ENSDARG00000098231	3.25157	0.000109518	0.00119107	hhex	protein_coding
ENSDARG00000103370	3.24819	7.85261e-06	0.000141741	lrrc8da	protein_coding
ENSDARG00000097964	3.24218	0.000490294	0.00381285	arhgef33	protein_coding
ENSDARG00000112959	3.24171	0.00599637	0.0249181	CABZ01072309.1	protein_coding
ENSDARG00000041792	3.24151	0.0062994	0.0258883	cx28.1	protein_coding
ENSDARG00000013711	3.23005	5.97591e-13	8.60053e-11	zgc:77486	protein_coding
ENSDARG00000103466	3.22711	0.00136261	0.00824645	ccl35.1	protein_coding
ENSDARG00000095830	3.2242	2.2837e-08	9.37272e-07	serpinb1l1	protein_coding
ENSDARG00000037852	3.2229	3.71845e-07	1.06606e-05	zgc:101663	protein_coding
ENSDARG00000004301	3.21466	1.32763e-21	7.34893e-19	rhogb	protein_coding
ENSDARG00000068969	3.21317	4.35219e-05	0.000575353	zgc:153759	protein_coding
ENSDARG00000094428	3.20451	5.87335e-05	0.000729539	si:dkey-31f5.8	protein_coding
ENSDARG00000033144	3.20134	1.01187e-16	2.83692e-14	psme2	protein_coding
ENSDARG00000068144	3.20004	0.00234926	0.0123818	nmba	protein_coding
ENSDARG00000000690	3.19506	5.85485e-14	1.04458e-11	sypl2b	protein_coding
ENSDARG00000088631	3.18957	0.000478355	0.00374972	BX000363.1	protein_coding
ENSDARG00000027310	3.18835	1.18324e-05	0.000199561	lsp1	protein_coding
ENSDARG00000018283	3.18766	4.63197e-14	8.40293e-12	cyba	protein_coding
ENSDARG00000067711	3.18439	3.83964e-10	2.80034e-08	parvg	protein_coding
ENSDARG00000088040	3.18075	2.43179e-14	4.7295e-12	si:dkeyp-27c8.2	protein_coding
ENSDARG00000012729	3.17899	1.69688e-14	3.42358e-12	hcls1	protein_coding
ENSDARG00000060127	3.17898	0.000242468	0.00223596	adamts3	protein_coding
ENSDARG00000097340	3.17715	0.000322708	0.00279223	si:ch211-33e4.2	protein_coding
ENSDARG00000038822	3.17715	8.47833e-36	6.10101e-32	mrc1b	protein_coding
ENSDARG00000077069	3.17663	3.49861e-12	4.31588e-10	srgn	protein_coding
ENSDARG00000008165	3.17524	2.37177e-06	5.23536e-05	caspa	protein_coding
ENSDARG00000035459	3.17335	2.18363e-07	6.7247e-06	spns3	protein_coding
ENSDARG00000090977	3.17234	0.00229858	0.0121651	ifit12	protein_coding
ENSDARG00000044001	3.16812	3.80127e-10	2.78176e-08	lgals3b	protein_coding
ENSDARG00000098739	3.16795	0.0124035	0.0431812	h2af1al	protein_coding
ENSDARG00000002002	3.15595	1.7401e-15	3.8332e-13	lmcd1	protein_coding
ENSDARG00000019521	3.15442	0.00342683	0.0163814	mpx	protein_coding
ENSDARG00000101169	3.1538	8.76705e-07	2.2398e-05	grap2b	protein_coding
ENSDARG00000029720	3.15318	0.00125753	0.00777643	si:dkeyp-9d4.2	protein_coding
ENSDARG00000104644	3.14623	0.00115055	0.007269	CABZ01085177.1	protein_coding
ENSDARG00000067596	3.14525	0.00296921	0.0147316	fancb	protein_coding
ENSDARG00000117789	3.1444	0.00763606	0.029945	CU855688.2	lincRNA
ENSDARG00000088283	3.14336	1.56545e-11	1.62554e-09	si:ch73-248e21.5	protein_coding
ENSDARG00000032631	3.14299	4.81381e-06	9.42163e-05	ltb4r	protein_coding
ENSDARG00000009313	3.14284	1.47496e-11	1.5457e-09	zgc:63831	protein_coding
ENSDARG00000027966	3.14004	4.53356e-06	8.9625e-05	ap1s3b	protein_coding
ENSDARG00000005789	3.13886	6.98233e-07	1.84272e-05	enpp1	protein_coding
ENSDARG00000056874	3.13476	3.54072e-12	4.34302e-10	lygl1	protein_coding
ENSDARG00000102835	3.13445	0.000198066	0.00190376	CABZ01021435.1	protein_coding
ENSDARG00000044318	3.13235	1.7224e-08	7.3923e-07	itgb7	protein_coding
ENSDARG00000069701	3.12893	2.89082e-06	6.19247e-05	lgi2b	protein_coding
ENSDARG00000036139	3.12872	0.000891259	0.00600038	lctla	protein_coding
ENSDARG00000032405	3.12766	1.186e-10	9.88545e-09	ckap4	protein_coding
ENSDARG00000105667	3.12324	5.43182e-07	1.475e-05	CU972454.4	lincRNA
ENSDARG00000026704	3.12063	0.00107174	0.00690234	ftr72	protein_coding
ENSDARG00000042018	3.11757	7.09366e-07	1.86982e-05	fhl2a	protein_coding
ENSDARG00000060498	3.11659	2.80774e-09	1.61636e-07	tnfrsf9a	protein_coding
ENSDARG00000099026	3.11486	9.91536e-08	3.4469e-06	si:dkey-185m8.2	protein_coding
ENSDARG00000020387	3.11341	4.90335e-07	1.35884e-05	nipsnap3a	protein_coding
ENSDARG00000114227	3.11328	0.000182921	0.00179008	CABZ01075242.1	protein_coding
ENSDARG00000009133	3.1074	0.00156783	0.00916003	myo1eb	protein_coding
ENSDARG00000028389	3.10566	1.94791e-07	6.10325e-06	rab44	protein_coding
ENSDARG00000077504	3.10469	0.00023231	0.00216076	si:ch211-103n10.5	protein_coding
ENSDARG00000019741	3.09473	0.000607387	0.00451059	si:ch211-152f23.5	protein_coding
ENSDARG00000060008	3.0933	0.0101951	0.0373658	hhipl2	protein_coding
ENSDARG00000005627	3.09277	0.000837195	0.00571761	zmp:0000000527	protein_coding
ENSDARG00000069627	3.08967	0.00166663	0.00959702	si:ch211-255g12.8	protein_coding
ENSDARG00000033251	3.08212	0.01329	0.0453891	osbpl3a	protein_coding
ENSDARG00000068175	3.08186	0.000361946	0.00304259	ing5b	protein_coding
ENSDARG00000090473	3.07587	7.30129e-05	0.000861521	si:ch211-269k10.5	protein_coding
ENSDARG00000044325	3.07488	2.54748e-05	0.000373353	zgc:193690	protein_coding
ENSDARG00000013274	3.07333	2.69983e-09	1.56659e-07	eif4eb	protein_coding
ENSDARG00000003061	3.07017	2.59404e-09	1.52043e-07	cd276	protein_coding
ENSDARG00000068851	3.06621	0.00491142	0.0214631	rnf183	protein_coding
ENSDARG00000076870	3.06408	1.70566e-06	3.96149e-05	piezo1	protein_coding
ENSDARG00000079373	3.06303	1.68061e-08	7.2562e-07	fosl1b	protein_coding
ENSDARG00000105239	3.06218	1.30686e-16	3.61698e-14	ecm1b	protein_coding
ENSDARG00000018971	3.062	0.000365673	0.00306135	b3gnt5a	protein_coding
ENSDARG00000020235	3.05422	2.47854e-08	1.01147e-06	sept9a	protein_coding
ENSDARG00000071491	3.05274	3.2705e-11	3.18034e-09	nrros	protein_coding
ENSDARG00000017121	3.05006	4.00689e-18	1.41805e-15	mafba	protein_coding
ENSDARG00000051874	3.04922	0.00113816	0.00721393	stra6	protein_coding
ENSDARG00000052322	3.04882	8.10989e-05	0.000935736	tlr5b	protein_coding
ENSDARG00000045277	3.04082	6.71833e-06	0.000124815	rdh12l	protein_coding
ENSDARG00000083308	3.04079	0.00170943	0.00979126	dre-mir-489	miRNA
ENSDARG00000056832	3.03609	0.0134421	0.0458143	exo1	protein_coding
ENSDARG00000097452	3.03573	9.12745e-06	0.000160721	CU929070.1	processed_transcript
ENSDARG00000069244	3.03489	0.00678122	0.0274196	si:ch211-244b2.3	protein_coding
ENSDARG00000099767	3.03302	5.1849e-08	1.95003e-06	fhdc2	protein_coding
ENSDARG00000019845	3.02868	2.44275e-07	7.42052e-06	pdlim1	protein_coding
ENSDARG00000034222	3.02732	6.51586e-09	3.27889e-07	hs1bp3	protein_coding
ENSDARG00000061377	3.02696	0.000461957	0.00365435	efcab1	protein_coding
ENSDARG00000014976	3.02627	0.000832895	0.00569545	lims2	protein_coding
ENSDARG00000062448	3.02619	0.0142802	0.0478722	skor1b	protein_coding
ENSDARG00000092660	3.02605	9.87448e-08	3.43823e-06	cyp27c1	protein_coding
ENSDARG00000062049	3.02428	5.20186e-33	1.60425e-29	hmha1b	protein_coding
ENSDARG00000019815	3.02307	7.98951e-13	1.11875e-10	fn1a	protein_coding
ENSDARG00000053124	3.0208	7.81256e-07	2.02957e-05	si:dkey-148a17.6	protein_coding
ENSDARG00000007990	3.0208	1.9103e-12	2.44021e-10	wt1b	protein_coding
ENSDARG00000010572	3.02023	3.71222e-11	3.49954e-09	slc25a25a	protein_coding
ENSDARG00000092470	3.01547	0.014218	0.0477206	thbd	protein_coding
ENSDARG00000093193	3.01445	0.0144964	0.0484481	chia.6	protein_coding
ENSDARG00000102617	3.00834	4.08186e-06	8.2586e-05	timp4.2	protein_coding
ENSDARG00000025301	3.00743	6.00242e-28	8.09876e-25	gfap	protein_coding
ENSDARG00000014929	3.00492	0.00671194	0.0271933	p2ry11	protein_coding
ENSDARG00000038669	2.99862	7.82733e-06	0.000141521	gbp2	protein_coding
ENSDARG00000099385	2.99833	2.91346e-08	1.16259e-06	CT030188.1	protein_coding
ENSDARG00000016773	2.99564	0.000217103	0.00204665	cishb	protein_coding
ENSDARG00000095150	2.99358	0.00275843	0.0139329	si:dkey-114c15.5	protein_coding
ENSDARG00000075643	2.98243	4.18821e-06	8.42638e-05	ifi35	protein_coding
ENSDARG00000089441	2.98014	2.53705e-05	0.000372078	si:ch211-105c13.3	protein_coding
ENSDARG00000113992	2.96989	0.00459794	0.0204872	apobec2b	protein_coding
ENSDARG00000098216	2.96975	0.00254039	0.0131086	si:ch211-215e19.3	protein_coding
ENSDARG00000031848	2.965	1.58552e-06	3.72045e-05	pparg	protein_coding
ENSDARG00000058358	2.9623	4.21585e-09	2.30409e-07	krt8	protein_coding
ENSDARG00000077176	2.95986	1.05606e-10	8.90555e-09	zgc:174888	protein_coding
ENSDARG00000024815	2.95974	2.82869e-06	6.09438e-05	ogfrl2	protein_coding
ENSDARG00000054942	2.95373	4.2145e-12	5.08283e-10	lgals2a	protein_coding
ENSDARG00000034643	2.94485	2.83718e-08	1.14058e-06	fhl3a	protein_coding
ENSDARG00000058342	2.94469	0.00126556	0.00781045	grhl2a	protein_coding
ENSDARG00000097396	2.9443	0.00721546	0.0287341	BX539313.1	lincRNA
ENSDARG00000044094	2.9437	0.00100031	0.0065637	gfpt2	protein_coding
ENSDARG00000036462	2.94319	3.78945e-06	7.75163e-05	rab11fip1b	protein_coding
ENSDARG00000097289	2.93885	0.00869796	0.0331518	BX629344.1	protein_coding
ENSDARG00000045561	2.93054	0.000542735	0.004127	dram1	protein_coding
ENSDARG00000021242	2.92913	6.74449e-17	1.94134e-14	mvp	protein_coding
ENSDARG00000030465	2.9248	6.57759e-05	0.000794166	tmem263	protein_coding
ENSDARG00000089043	2.9119	7.38868e-12	8.30765e-10	ptpn6	protein_coding
ENSDARG00000031776	2.90482	3.87159e-10	2.80469e-08	zgc:92066	protein_coding
ENSDARG00000060316	2.90425	6.21543e-05	0.00076065	cish	protein_coding
ENSDARG00000039150	2.89644	1.84953e-16	4.92933e-14	lgmn	protein_coding
ENSDARG00000052826	2.89387	0.00387483	0.0180163	runx3	protein_coding
ENSDARG00000117781	2.893	1.97944e-10	1.5539e-08	CABZ01073834.1	lincRNA
ENSDARG00000059774	2.893	0.000112563	0.00121927	dub	protein_coding
ENSDARG00000057206	2.89168	0.00237036	0.0124626	nmt1b	protein_coding
ENSDARG00000051768	2.88852	5.46262e-12	6.34016e-10	fhod1	protein_coding
ENSDARG00000069017	2.88843	0.00164483	0.0095081	elnb	protein_coding
ENSDARG00000006353	2.88605	1.85847e-06	4.25008e-05	itga5	protein_coding
ENSDARG00000079486	2.88556	0.00815034	0.0315173	fam20a	protein_coding
ENSDARG00000075592	2.88471	4.40761e-10	3.15071e-08	tnfaip8l2a	protein_coding
ENSDARG00000089582	2.88418	0.00142188	0.00851002	si:dkey-265e15.2	protein_coding
ENSDARG00000071410	2.88253	0.00251254	0.0130068	cks2	protein_coding
ENSDARG00000076721	2.88218	0.00131051	0.00800092	zgc:171686	protein_coding
ENSDARG00000099351	2.88048	1.59836e-08	6.95672e-07	igfbp1a	protein_coding
ENSDARG00000011371	2.8786	0.00193579	0.0107154	zgc:64106	protein_coding
ENSDARG00000102568	2.87691	0.00046363	0.00366356	si:ch73-106k19.2	protein_coding
ENSDARG00000041911	2.8762	2.00876e-05	0.000306467	si:ch211-245h14.1	protein_coding
ENSDARG00000086762	2.87596	0.00520283	0.0224376	gsdmea	protein_coding
ENSDARG00000096592	2.87145	0.00106112	0.00686057	BX908780.2	sense_intronic
ENSDARG00000101984	2.86821	0.000490829	0.00381563	pde6gb	protein_coding
ENSDARG00000101514	2.86368	0.000171303	0.00170322	ftr64	protein_coding
ENSDARG00000037954	2.86341	0.000732516	0.00519328	tnnt1	protein_coding
ENSDARG00000113087	2.85545	0.0048235	0.0211947	BX569796.1	protein_coding
ENSDARG00000059906	2.85001	8.49447e-15	1.76326e-12	sdc4	protein_coding
ENSDARG00000007018	2.84231	5.47029e-05	0.000692233	ms4a17a.6	protein_coding
ENSDARG00000110967	2.84123	0.000178153	0.00175214	FP102169.1	protein_coding
ENSDARG00000034063	2.83923	3.70073e-06	7.6087e-05	unm_sa911	protein_coding
ENSDARG00000090552	2.8371	2.54874e-20	1.19613e-17	si:dkey-7j14.6	protein_coding
ENSDARG00000068784	2.8335	4.73814e-09	2.5256e-07	vsir	protein_coding
ENSDARG00000010032	2.82837	1.06029e-09	6.87375e-08	cmtm7	protein_coding
ENSDARG00000111612	2.82743	4.73946e-12	5.62172e-10	mapkapk3	protein_coding
ENSDARG00000026990	2.82583	2.65748e-06	5.77741e-05	klhl6	protein_coding
ENSDARG00000010384	2.82303	0.000473119	0.00371948	lpar5a	protein_coding
ENSDARG00000116881	2.82114	0.00320888	0.015581	CR352220.1	protein_coding
ENSDARG00000095351	2.81946	0.000514805	0.00395684	CU914776.1	processed_transcript
ENSDARG00000100657	2.81546	1.32378e-05	0.000218485	egfl7	protein_coding
ENSDARG00000075092	2.80369	0.00252959	0.0130675	si:dkey-52l18.4	protein_coding
ENSDARG00000042925	2.79845	1.95515e-10	1.54043e-08	mfng	protein_coding
ENSDARG00000089933	2.79737	0.000535063	0.00408305	rasal3	protein_coding
ENSDARG00000069482	2.79686	0.00654214	0.0266907	traf1	protein_coding
ENSDARG00000090337	2.79653	1.55067e-13	2.47969e-11	pprc1	protein_coding
ENSDARG00000090882	2.79138	2.56347e-09	1.50791e-07	si:rp71-36a1.5	protein_coding
ENSDARG00000043403	2.78754	3.76301e-10	2.76312e-08	paox1	protein_coding
ENSDARG00000044807	2.78462	0.000906231	0.00607294	dck	protein_coding
ENSDARG00000092310	2.78364	1.33796e-06	3.21648e-05	si:ch211-199g17.2	protein_coding
ENSDARG00000063292	2.78058	1.37844e-09	8.72664e-08	ssuh2rs1	protein_coding
ENSDARG00000082187	2.77875	3.62435e-07	1.04462e-05	dre-mir-21-1	miRNA
ENSDARG00000035326	2.77242	1.30016e-08	5.87193e-07	nccrp1	protein_coding
ENSDARG00000059177	2.76885	4.83699e-08	1.83194e-06	tax1bp3	protein_coding
ENSDARG00000070485	2.76847	0.00625188	0.0257519	cenps	protein_coding
ENSDARG00000035552	2.76739	2.42821e-05	0.000359782	agtr2	protein_coding
ENSDARG00000099600	2.76543	0.000383854	0.00317719	si:dkey-93h22.7	protein_coding
ENSDARG00000040445	2.76423	4.87364e-07	1.35234e-05	si:ch211-219a4.3	protein_coding
ENSDARG00000073978	2.7624	0.00271986	0.0137929	crabp2a	protein_coding
ENSDARG00000094451	2.76227	3.91204e-14	7.21821e-12	cfp	protein_coding
ENSDARG00000061060	2.76155	0.000785754	0.00546098	stpg2	protein_coding
ENSDARG00000071084	2.75883	2.69782e-14	5.15402e-12	wipf1b	protein_coding
ENSDARG00000078800	2.75836	0.00500401	0.021762	slc26a10	protein_coding
ENSDARG00000101161	2.75699	1.8286e-05	0.000284202	orc4	protein_coding
ENSDARG00000097617	2.75562	9.44032e-08	3.30304e-06	si:ch211-178n15.1	protein_coding
ENSDARG00000107065	2.75402	0.00127759	0.00786299	PEBP4	protein_coding
ENSDARG00000103747	2.75291	0.000188769	0.00183482	cav1	protein_coding
ENSDARG00000089291	2.75246	9.96684e-05	0.00110624	cenpx	protein_coding
ENSDARG00000096717	2.74718	1.39435e-07	4.56772e-06	AL732488.1	lincRNA
ENSDARG00000104325	2.7462	9.14733e-10	6.03891e-08	plek	protein_coding
ENSDARG00000029722	2.74357	1.05265e-15	2.41752e-13	hmgb2a	protein_coding
ENSDARG00000027867	2.74353	0.000317985	0.002758	paplna	protein_coding
ENSDARG00000092066	2.74324	0.00291196	0.0145114	CT583708.1	sense_intronic
ENSDARG00000081580	2.7429	0.001495	0.00885679	RF00608	snoRNA
ENSDARG00000044775	2.74236	0.000237142	0.00219059	fut7	protein_coding
ENSDARG00000044129	2.74131	0.0121168	0.0424639	si:ch211-214p16.1	processed_transcript
ENSDARG00000098129	2.73822	6.36675e-05	0.000775651	si:dkeyp-97a10.2	protein_coding
ENSDARG00000057633	2.73779	0.000207732	0.00197817	cxcr4a	protein_coding
ENSDARG00000078824	2.73732	6.34857e-05	0.000773873	si:ch211-66e2.3	protein_coding
ENSDARG00000068417	2.73683	0.00243547	0.0127164	foxl2b	protein_coding
ENSDARG00000030782	2.73598	0.000660632	0.00479547	exoc3l2b	protein_coding
ENSDARG00000023053	2.72784	1.7916e-08	7.64369e-07	fam129ab	protein_coding
ENSDARG00000097992	2.72483	0.00384066	0.0179076	BX005450.1	antisense
ENSDARG00000039459	2.72323	8.89837e-06	0.000157383	qsox1	protein_coding
ENSDARG00000091381	2.72187	0.0130645	0.0447604	si:ch211-214c20.1	protein_coding
ENSDARG00000057630	2.72132	0.000132034	0.00138704	galm	protein_coding
ENSDARG00000067916	2.72125	4.06016e-15	8.5932e-13	lyn	protein_coding
ENSDARG00000027657	2.72061	0.00381326	0.0178029	crhb	protein_coding
ENSDARG00000031534	2.71757	0.00255412	0.0131595	CU571315.1	protein_coding
ENSDARG00000011376	2.71739	0.000100897	0.00111586	dnase1l4.2	protein_coding
ENSDARG00000078249	2.71622	1.01286e-05	0.000175769	unc13d	protein_coding
ENSDARG00000108038	2.71557	1.43486e-07	4.67912e-06	CABZ01109481.1	protein_coding
ENSDARG00000026403	2.71504	0.000685246	0.00492473	hephl1b	protein_coding
ENSDARG00000016607	2.713	2.04725e-07	6.3683e-06	echdc2	protein_coding
ENSDARG00000105187	2.71197	0.00021081	0.00199692	gcshb	protein_coding
ENSDARG00000074904	2.70933	1.90297e-06	4.33347e-05	si:ch211-253b8.5	protein_coding
ENSDARG00000042984	2.70595	0.0118483	0.0418107	fpr1	protein_coding
ENSDARG00000098293	2.70231	5.83322e-08	2.15261e-06	si:dkey-27i16.2	protein_coding
ENSDARG00000079497	2.69953	3.03421e-09	1.73287e-07	tcima	protein_coding
ENSDARG00000034895	2.69713	7.06673e-06	0.000130168	tgfb1b	protein_coding
ENSDARG00000100383	2.69509	1.09084e-09	7.05065e-08	il10ra	protein_coding
ENSDARG00000070774	2.69049	0.000739305	0.00522939	irgf1	protein_coding
ENSDARG00000002196	2.68885	5.90795e-10	4.07479e-08	bach1b	protein_coding
ENSDARG00000033285	2.6857	0.00217955	0.0116707	gsto2	protein_coding
ENSDARG00000074326	2.68555	0.00464339	0.0206165	mcm8	protein_coding
ENSDARG00000092892	2.67985	0.0128129	0.0441775	si:dkey-23c22.5	protein_coding
ENSDARG00000077641	2.67888	0.00239588	0.0125478	thbs3a	protein_coding
ENSDARG00000012972	2.67845	7.78873e-06	0.00014106	cfl1l	protein_coding
ENSDARG00000019564	2.67596	3.98533e-05	0.000534712	asap2b	protein_coding
ENSDARG00000023188	2.67226	1.63022e-12	2.12007e-10	lcp1	protein_coding
ENSDARG00000039477	2.67223	0.0148811	0.0493854	terb2	protein_coding
ENSDARG00000007412	2.66845	1.9389e-05	0.000297068	slc2a1b	protein_coding
ENSDARG00000038123	2.66734	1.90253e-09	1.17014e-07	myl9a	protein_coding
ENSDARG00000053005	2.664	0.000614694	0.00455389	cd22	protein_coding
ENSDARG00000061351	2.66298	0.00042409	0.00342509	tfpi2	protein_coding
ENSDARG00000025147	2.66259	5.97338e-14	1.05699e-11	cd63	protein_coding
ENSDARG00000104370	2.66149	0.000643509	0.0047044	esm1	protein_coding
ENSDARG00000008026	2.65889	0.000261773	0.00237343	fam129bb	protein_coding
ENSDARG00000057239	2.65726	0.00567045	0.0239276	tph2	protein_coding
ENSDARG00000055381	2.65202	1.08776e-05	0.000186369	bambia	protein_coding
ENSDARG00000067958	2.65095	0.0112535	0.0403224	sh3gl1a	protein_coding
ENSDARG00000041108	2.64892	5.41953e-08	2.02067e-06	ctsh	protein_coding
ENSDARG00000030215	2.64834	0.0094517	0.035272	matn1	protein_coding
ENSDARG00000038151	2.6458	1.77197e-06	4.09564e-05	zgc:92360	protein_coding
ENSDARG00000044694	2.64347	6.98557e-09	3.45882e-07	fybb	protein_coding
ENSDARG00000099124	2.64305	1.29461e-05	0.00021482	f3a	protein_coding
ENSDARG00000103735	2.6357	9.83982e-16	2.28411e-13	elovl1b	protein_coding
ENSDARG00000098477	2.63438	1.03706e-06	2.59421e-05	tec	protein_coding
ENSDARG00000045408	2.62844	0.000305682	0.00267944	tagln	protein_coding
ENSDARG00000070404	2.628	0.00262887	0.0134547	inka1b	protein_coding
ENSDARG00000029036	2.62592	2.15012e-06	4.82003e-05	rab32a	protein_coding
ENSDARG00000051940	2.62263	1.73633e-08	7.43729e-07	ugt2a4	protein_coding
ENSDARG00000037961	2.62224	9.71852e-06	0.000169333	rcn3	protein_coding
ENSDARG00000040280	2.62196	0.000454125	0.00361625	zgc:110182	protein_coding
ENSDARG00000053449	2.61594	0.00196549	0.0108242	pyya	protein_coding
ENSDARG00000069961	2.61466	0.00054783	0.00415989	il21r.1	protein_coding
ENSDARG00000098622	2.61272	0.00337909	0.0162034	ccne1	protein_coding
ENSDARG00000018566	2.61252	0.0114696	0.0408382	flnca	protein_coding
ENSDARG00000094012	2.60999	3.39287e-05	0.00046892	si:dkey-192g7.3	protein_coding
ENSDARG00000016793	2.60846	0.0100682	0.0369898	crybb1l2	protein_coding
ENSDARG00000016457	2.60383	1.66116e-25	1.63005e-22	irf9	protein_coding
ENSDARG00000096419	2.60214	0.000244006	0.00224631	CU659670.1	lincRNA
ENSDARG00000099014	2.59853	0.00623687	0.0257097	fxyd1	protein_coding
ENSDARG00000004713	2.59458	0.00316962	0.0154479	mad2l1	protein_coding
ENSDARG00000039007	2.59356	1.57884e-10	1.28135e-08	eno3	protein_coding
ENSDARG00000068993	2.58849	5.38401e-06	0.00010387	zgc:153631	protein_coding
ENSDARG00000019907	2.58461	0.0047998	0.0211164	dscc1	protein_coding
ENSDARG00000043249	2.58249	4.02484e-11	3.72911e-09	irf1b	protein_coding
ENSDARG00000004937	2.58171	0.00279222	0.0140509	skp2	protein_coding
ENSDARG00000014946	2.5797	0.00737258	0.0292035	angpt2a	protein_coding
ENSDARG00000056145	2.57869	0.00370226	0.0174127	si:dkey-159a18.1	protein_coding
ENSDARG00000012945	2.57466	0.000113373	0.00122558	tnfsf13b	protein_coding
ENSDARG00000042214	2.57436	0.0146106	0.0487651	tmem243a	protein_coding
ENSDARG00000070792	2.56931	5.76816e-05	0.000719371	lrrc15	protein_coding
ENSDARG00000026454	2.56876	0.00278978	0.0140419	mis12	protein_coding
ENSDARG00000100461	2.56873	0.000234268	0.00217428	CABZ01078737.1	protein_coding
ENSDARG00000086708	2.56773	0.00249858	0.0129506	CR847543.1	protein_coding
ENSDARG00000089892	2.56666	0.00027279	0.00245375	cd44b	protein_coding
ENSDARG00000110700	2.56315	1.21485e-07	4.05979e-06	COX7A2 (1 of many)	protein_coding
ENSDARG00000087844	2.56161	0.00146803	0.00873293	plekhn1	protein_coding
ENSDARG00000071871	2.56098	7.59384e-07	1.97751e-05	glod5	protein_coding
ENSDARG00000097473	2.56046	0.00953779	0.0355187	zgc:113340	protein_coding
ENSDARG00000054658	2.556	0.000515746	0.00396084	slc34a1b	protein_coding
ENSDARG00000117211	2.55263	0.000278847	0.0024935	CR936462.1	lincRNA
ENSDARG00000031506	2.55248	4.54256e-13	6.71677e-11	flvcr2b	protein_coding
ENSDARG00000101334	2.54917	6.06702e-16	1.45528e-13	ctsc	protein_coding
ENSDARG00000097238	2.5483	0.000275017	0.00246617	hbba1	protein_coding
ENSDARG00000020079	2.54723	0.00763902	0.0299512	neil3	protein_coding
ENSDARG00000043581	2.54654	9.87884e-06	0.000171987	gadd45aa	protein_coding
ENSDARG00000099724	2.5406	1.65928e-06	3.87249e-05	relt	protein_coding
ENSDARG00000042338	2.53952	0.00284691	0.0142597	lpar2a	protein_coding
ENSDARG00000101356	2.53862	0.00815088	0.0315173	CABZ01044156.1	protein_coding
ENSDARG00000069335	2.53733	0.000637577	0.00467686	bcl6b	protein_coding
ENSDARG00000017354	2.5351	0.000809251	0.00557794	epha2a	protein_coding
ENSDARG00000029936	2.53506	2.52521e-05	0.000370593	grtp1a	protein_coding
ENSDARG00000039174	2.53391	5.25904e-05	0.000670994	olfm3b	protein_coding
ENSDARG00000077130	2.52822	4.94874e-07	1.36966e-05	bcl10	protein_coding
ENSDARG00000032318	2.52682	0.000105633	0.00115581	mfsd6a	protein_coding
ENSDARG00000030092	2.52672	1.3722e-05	0.000224927	tram2	protein_coding
ENSDARG00000096917	2.52183	0.00151615	0.00894767	si:ch211-227m13.1	protein_coding
ENSDARG00000071360	2.52094	0.00549681	0.0233501	morn2	protein_coding
ENSDARG00000077039	2.51817	0.000114682	0.00123587	esama	protein_coding
ENSDARG00000063177	2.51633	1.38657e-13	2.26767e-11	manf	protein_coding
ENSDARG00000102291	2.51468	4.59424e-09	2.46718e-07	eef1da	protein_coding
ENSDARG00000070021	2.50858	0.00183746	0.0103246	cyp3c4	protein_coding
ENSDARG00000089087	2.50615	0.000117811	0.00125969	hbba1	protein_coding
ENSDARG00000099690	2.50412	1.27145e-06	3.08216e-05	vaspa	protein_coding
ENSDARG00000018643	2.50311	9.13858e-16	2.14439e-13	igf2a	protein_coding
ENSDARG00000020956	2.50163	0.00273384	0.0138378	pck2	protein_coding
ENSDARG00000040249	2.50094	0.0062532	0.0257524	tlr18	protein_coding
ENSDARG00000021677	2.50045	2.03461e-08	8.43054e-07	phf11	protein_coding
ENSDARG00000016730	2.4967	7.21685e-05	0.00085486	rfxank	protein_coding
ENSDARG00000074754	2.49564	0.000531493	0.00406011	si:dkey-188i13.9	protein_coding
ENSDARG00000075748	2.49554	1.01322e-10	8.61156e-09	NCKAP1L	protein_coding
ENSDARG00000067797	2.49002	1.47938e-06	3.51341e-05	spi1a	protein_coding
ENSDARG00000105258	2.48978	0.00368693	0.0173558	cep72	protein_coding
ENSDARG00000006840	2.48903	3.76662e-06	7.72211e-05	gnmt	protein_coding
ENSDARG00000024209	2.48785	4.43716e-10	3.16137e-08	wasf2	protein_coding
ENSDARG00000090890	2.48752	5.17132e-09	2.72289e-07	cmklr1	protein_coding
ENSDARG00000102701	2.48717	1.17949e-05	0.000199085	eva1ba	protein_coding
ENSDARG00000117590	2.48584	0.00971206	0.0359952	CR385067.1	lincRNA
ENSDARG00000010625	2.48527	8.03253e-13	1.11875e-10	clic2	protein_coding
ENSDARG00000087474	2.4834	0.0001175	0.00125761	ccr6a	protein_coding
ENSDARG00000042637	2.48031	0.0120732	0.0423498	tert	protein_coding
ENSDARG00000044544	2.47162	5.54811e-06	0.00010637	zgc:110782	protein_coding
ENSDARG00000036876	2.46968	0.00638413	0.0261519	zgc:153284	protein_coding
ENSDARG00000111474	2.46666	0.000946399	0.00628062	cfap100	protein_coding
ENSDARG00000068240	2.46436	0.00162686	0.0094208	trim110	protein_coding
ENSDARG00000058365	2.46384	0.000851811	0.00578847	hspb8	protein_coding
ENSDARG00000095339	2.46097	0.00270108	0.0137267	si:dkeyp-44a8.4	protein_coding
ENSDARG00000010244	2.46062	3.6105e-10	2.66019e-08	rpl22l1	protein_coding
ENSDARG00000092807	2.4461	1.27129e-08	5.7657e-07	RPL41	protein_coding
ENSDARG00000087798	2.44518	0.000447211	0.00356909	pdyn	protein_coding
ENSDARG00000058968	2.44486	0.0081793	0.0315995	haus1	protein_coding
ENSDARG00000011876	2.44121	0.000213562	0.00201679	ednraa	protein_coding
ENSDARG00000103341	2.43985	0.00165066	0.00952486	si:ch211-110e21.4	protein_coding
ENSDARG00000058100	2.43868	3.75146e-06	7.70565e-05	b3gnt3.4	protein_coding
ENSDARG00000006427	2.43842	0.00276395	0.0139497	fabp2	protein_coding
ENSDARG00000036990	2.43686	0.00371837	0.017477	dctd	protein_coding
ENSDARG00000102717	2.43584	3.86935e-10	2.80469e-08	tmem42a	protein_coding
ENSDARG00000044982	2.43491	8.35985e-07	2.15104e-05	dhrs3a	protein_coding
ENSDARG00000076858	2.43264	7.24094e-05	0.000856065	TCIM (1 of many)	protein_coding
ENSDARG00000058346	2.4316	0.00210758	0.0113831	sass6	protein_coding
ENSDARG00000092945	2.43126	0.00110916	0.00708628	si:ch211-250g4.3	protein_coding
ENSDARG00000101323	2.42921	1.60891e-05	0.000256333	trnau1apa	protein_coding
ENSDARG00000088260	2.42828	0.00760717	0.0298643	gig2p	protein_coding
ENSDARG00000038095	2.42555	0.000993834	0.00652719	socs1a	protein_coding
ENSDARG00000002986	2.42338	5.52974e-05	0.00069607	gda	protein_coding
ENSDARG00000069302	2.42209	1.64508e-11	1.69923e-09	snx9b	protein_coding
ENSDARG00000030012	2.42189	3.63637e-08	1.42214e-06	lrrfip1a	protein_coding
ENSDARG00000057787	2.42131	6.52333e-10	4.45651e-08	itgae.2	protein_coding
ENSDARG00000110069	2.42027	0.00905344	0.034133	pdgfaa	protein_coding
ENSDARG00000100019	2.41918	0.00174892	0.0099593	arhgap11a	protein_coding
ENSDARG00000011201	2.41856	1.26071e-08	5.72974e-07	rplp2l	protein_coding
ENSDARG00000097072	2.415	0.00335937	0.016134	AL954322.2	lincRNA
ENSDARG00000061177	2.41425	0.00284146	0.0142489	mov10b.1	protein_coding
ENSDARG00000089564	2.41071	0.00957275	0.0356158	MDFI	protein_coding
ENSDARG00000101629	2.40849	0.000417843	0.00338604	CABZ01079192.1	protein_coding
ENSDARG00000036057	2.40343	9.24864e-09	4.39435e-07	tradd	protein_coding
ENSDARG00000097533	2.40146	0.001911	0.0106092	BX571880.1	lincRNA
ENSDARG00000104696	2.39871	3.34661e-07	9.73673e-06	apooa	protein_coding
ENSDARG00000099155	2.39812	0.000435818	0.00349366	tpst2	protein_coding
ENSDARG00000067751	2.3979	3.8369e-08	1.48709e-06	si:rp71-68n21.9	protein_coding
ENSDARG00000026829	2.3937	1.30782e-19	5.7619e-17	cotl1	protein_coding
ENSDARG00000005593	2.39208	4.25613e-06	8.52663e-05	rxrga	processed_transcript
ENSDARG00000093052	2.39128	0.0127055	0.0439068	c6	protein_coding
ENSDARG00000056024	2.38961	0.000192251	0.0018578	eva1c	protein_coding
ENSDARG00000008388	2.3892	1.04002e-07	3.57386e-06	mmp14b	protein_coding
ENSDARG00000089697	2.38752	0.00168362	0.00967681	nfe2l2b	protein_coding
ENSDARG00000091555	2.38723	1.8039e-11	1.84562e-09	ostf1	protein_coding
ENSDARG00000054438	2.38559	2.13575e-07	6.59607e-06	fzd2	protein_coding
ENSDARG00000104011	2.38479	5.31615e-12	6.20352e-10	rps17	protein_coding
ENSDARG00000101331	2.38477	0.00179912	0.010162	tekt1	protein_coding
ENSDARG00000076574	2.38256	3.11655e-07	9.11653e-06	si:ch211-171h4.6	protein_coding
ENSDARG00000052343	2.38035	0.00462174	0.0205381	spata18	protein_coding
ENSDARG00000105185	2.37797	1.20107e-07	4.03872e-06	snx7	protein_coding
ENSDARG00000088078	2.37783	0.00301038	0.0148894	usp18	protein_coding
ENSDARG00000058325	2.37665	1.06778e-06	2.64652e-05	casp8	protein_coding
ENSDARG00000068711	2.3754	1.85619e-07	5.86343e-06	crfb4	protein_coding
ENSDARG00000100150	2.37507	0.00216575	0.0116217	FQ377903.1	protein_coding
ENSDARG00000059081	2.37321	0.0146317	0.0488205	LO018513.1	protein_coding
ENSDARG00000090912	2.37309	2.18086e-11	2.17965e-09	npc2	protein_coding
ENSDARG00000038541	2.37169	0.000529764	0.00405264	ccr12a	protein_coding
ENSDARG00000030743	2.37008	0.000302903	0.00266357	sptlc3	protein_coding
ENSDARG00000103984	2.36981	1.26811e-06	3.07941e-05	cyth4b	protein_coding
ENSDARG00000058820	2.36114	0.00110329	0.00706129	bin1b	protein_coding
ENSDARG00000040812	2.36074	1.43056e-08	6.34283e-07	ncf4	protein_coding
ENSDARG00000103854	2.35893	0.00912909	0.0343582	pdlim7	protein_coding
ENSDARG00000043899	2.35812	9.94532e-08	3.45176e-06	psma6l	protein_coding
ENSDARG00000040179	2.35615	0.00891198	0.0337175	zgc:101562	protein_coding
ENSDARG00000006174	2.35294	0.0100721	0.036997	lrrc23	protein_coding
ENSDARG00000113643	2.35293	6.09884e-05	0.000749783	ralbb	protein_coding
ENSDARG00000061579	2.35166	1.31773e-09	8.39147e-08	myo1cb	protein_coding
ENSDARG00000100366	2.35152	3.13441e-05	0.000439673	si:dkey-102m7.3	protein_coding
ENSDARG00000095015	2.35111	0.00904998	0.0341259	BX571955.2	processed_transcript
ENSDARG00000015149	2.34981	8.9798e-05	0.00101922	wasa	protein_coding
ENSDARG00000040192	2.34332	3.34552e-05	0.000464158	nenf	protein_coding
ENSDARG00000090889	2.34215	0.000864535	0.00585103	si:ch211-132p1.3	protein_coding
ENSDARG00000005525	2.34162	0.0091964	0.0345453	acy3.2	protein_coding
ENSDARG00000037895	2.34145	0.0015046	0.00888683	ramp2	protein_coding
ENSDARG00000058128	2.33644	7.18223e-14	1.2504e-11	msna	protein_coding
ENSDARG00000071586	2.33149	0.00187012	0.0104429	tgfbi	protein_coding
ENSDARG00000092166	2.33063	8.66078e-08	3.06507e-06	si:dkey-147f3.8	protein_coding
ENSDARG00000080020	2.32976	7.2339e-06	0.000132611	il13ra1	protein_coding
ENSDARG00000045144	2.32836	0.0014883	0.00883163	zgc:163057	protein_coding
ENSDARG00000086724	2.32769	0.013808	0.0467	im:7151449	protein_coding
ENSDARG00000058372	2.32416	0.0112849	0.0404012	mcph1	protein_coding
ENSDARG00000098745	2.32334	0.000896056	0.0060245	tfec	protein_coding
ENSDARG00000055713	2.32208	1.90342e-08	7.99435e-07	fmnl1a	protein_coding
ENSDARG00000004274	2.32119	0.00121684	0.00757716	zgc:112496	protein_coding
ENSDARG00000078659	2.32043	3.0991e-07	9.07781e-06	tmem176	protein_coding
ENSDARG00000098114	2.31624	6.31994e-12	7.21878e-10	ctsa	protein_coding
ENSDARG00000067672	2.31527	0.00305012	0.0150368	card9	protein_coding
ENSDARG00000005023	2.31506	4.11016e-08	1.5873e-06	fkbp9	protein_coding
ENSDARG00000042962	2.31345	9.46383e-07	2.38953e-05	dgcr2	protein_coding
ENSDARG00000104367	2.30896	0.00479428	0.0210977	zgc:194469	protein_coding
ENSDARG00000042470	2.3081	0.000459382	0.00364333	s1pr3a	protein_coding
ENSDARG00000114885	2.30728	0.00110745	0.00707954	PXMP4	protein_coding
ENSDARG00000070357	2.30667	0.000328047	0.00282259	cx39.4	protein_coding
ENSDARG00000004932	2.30624	8.02715e-06	0.000144168	anos1b	protein_coding
ENSDARG00000069846	2.30548	2.6818e-11	2.65157e-09	zgc:162944	protein_coding
ENSDARG00000021827	2.30355	0.000586712	0.00438723	katna1	protein_coding
ENSDARG00000020114	2.30216	0.00359165	0.0170186	slc20a1a	protein_coding
ENSDARG00000094485	2.29814	1.39327e-05	0.00022769	si:dkey-27h10.2	protein_coding
ENSDARG00000069453	2.29675	0.0046054	0.02049	zgc:113314	protein_coding
ENSDARG00000019137	2.29542	3.59851e-14	6.69696e-12	tram1	protein_coding
ENSDARG00000057113	2.2954	5.98513e-05	0.000739593	c6	protein_coding
ENSDARG00000101170	2.29175	0.0099614	0.0366978	rab42b	protein_coding
ENSDARG00000079034	2.29103	0.00829854	0.0319566	si:dkey-19b23.11	protein_coding
ENSDARG00000117089	2.28979	0.00126481	0.00780808	CKS2	protein_coding
ENSDARG00000016484	2.28896	2.75701e-10	2.08836e-08	dkc1	protein_coding
ENSDARG00000008840	2.28876	1.36917e-10	1.12386e-08	hmbsa	protein_coding
ENSDARG00000062152	2.2879	5.43073e-06	0.000104584	chaf1a	protein_coding
ENSDARG00000098398	2.28517	1.82329e-08	7.71789e-07	CABZ01079480.1	protein_coding
ENSDARG00000003113	2.28506	3.0052e-10	2.2605e-08	ada	protein_coding
ENSDARG00000101030	2.28387	0.00010694	0.00116774	si:ch73-158p21.3	protein_coding
ENSDARG00000036875	2.28132	3.36535e-10	2.4966e-08	rps12	protein_coding
ENSDARG00000029955	2.27988	5.46317e-06	0.000105115	glb1l	protein_coding
ENSDARG00000025428	2.27883	6.71521e-06	0.000124815	socs3a	protein_coding
ENSDARG00000098012	2.2785	0.00015746	0.00158791	itgae.1	protein_coding
ENSDARG00000013719	2.27847	0.00994438	0.0366722	gtse1	protein_coding
ENSDARG00000013144	2.27548	4.53025e-06	8.9625e-05	atp1b1a	protein_coding
ENSDARG00000076005	2.27314	0.0025991	0.0133403	piezo2a.2	protein_coding
ENSDARG00000030881	2.27144	7.39656e-06	0.000135017	baxb	protein_coding
ENSDARG00000004105	2.26919	4.41041e-05	0.000581269	tie1	protein_coding
ENSDARG00000071014	2.26824	1.56489e-05	0.000250614	s100u	protein_coding
ENSDARG00000012247	2.2666	1.03194e-05	0.000177935	def6a	protein_coding
ENSDARG00000053858	2.2653	9.18193e-06	0.000161254	crip1	protein_coding
ENSDARG00000027658	2.2631	0.007718	0.0301841	irf10	protein_coding
ENSDARG00000103533	2.26004	0.000692416	0.00496428	clec14a	protein_coding
ENSDARG00000041703	2.25613	0.0126441	0.0437576	rrbp1b	protein_coding
ENSDARG00000076010	2.25557	0.00237766	0.0124888	twist1b	protein_coding
ENSDARG00000041502	2.25516	0.000179809	0.00176441	tgfb1a	protein_coding
ENSDARG00000074283	2.25349	1.04522e-06	2.61111e-05	inpp5d	protein_coding
ENSDARG00000038066	2.253	5.41297e-05	0.000686576	kpna2	protein_coding
ENSDARG00000056378	2.25231	0.000234547	0.002175	ifi30	protein_coding
ENSDARG00000110178	2.25121	0.000675697	0.00487694	CABZ01066694.1	protein_coding
ENSDARG00000091349	2.25091	0.0139092	0.0469518	plekhd1	protein_coding
ENSDARG00000098861	2.25067	0.00155094	0.00909787	si:dkey-71b5.6	protein_coding
ENSDARG00000116939	2.2495	0.0138582	0.046848	CR759875.1	protein_coding
ENSDARG00000076221	2.24678	0.000127068	0.00134333	zgc:198419	protein_coding
ENSDARG00000078613	2.24664	0.010282	0.0376025	vhll	protein_coding
ENSDARG00000042936	2.24203	0.00118121	0.00741921	fam228a	protein_coding
ENSDARG00000015033	2.24196	0.00782353	0.0305154	slc23a1	protein_coding
ENSDARG00000078014	2.2406	1.3449e-28	2.23337e-25	pacsin2	protein_coding
ENSDARG00000063285	2.23556	0.00182352	0.0102623	ube2t	protein_coding
ENSDARG00000060094	2.2351	0.00209493	0.0113403	ptgis	protein_coding
ENSDARG00000059558	2.23452	0.000308789	0.00269775	tecta	protein_coding
ENSDARG00000007241	2.23329	3.16058e-06	6.68927e-05	mycb	protein_coding
ENSDARG00000076189	2.2322	2.04235e-09	1.24198e-07	ccdc88b	protein_coding
ENSDARG00000107280	2.23189	0.00316363	0.0154272	FO744833.1	protein_coding
ENSDARG00000075664	2.23186	0.00660658	0.0268618	si:ch1073-429i10.1	protein_coding
ENSDARG00000094809	2.23041	9.96861e-10	6.52128e-08	ms4a17a.11	protein_coding
ENSDARG00000059231	2.23009	0.00039072	0.00321821	hephl1a	protein_coding
ENSDARG00000012694	2.22934	0.0113299	0.0404751	c3a.1	protein_coding
ENSDARG00000104045	2.22658	0.00293398	0.0145942	tlr22	protein_coding
ENSDARG00000056379	2.22641	0.00587874	0.0245522	si:ch73-86n18.1	protein_coding
ENSDARG00000070606	2.22553	7.48903e-05	0.00087863	ikbke	protein_coding
ENSDARG00000098153	2.22503	7.93669e-06	0.000143019	lhfpl2b	protein_coding
ENSDARG00000058730	2.22169	3.96775e-05	0.000533094	rdh10a	protein_coding
ENSDARG00000016044	2.22029	0.00195938	0.0108099	gins4	protein_coding
ENSDARG00000013794	2.21791	9.84189e-14	1.6599e-11	klf11b	protein_coding
ENSDARG00000102320	2.21712	5.37196e-19	2.23019e-16	mob1a	protein_coding
ENSDARG00000111107	2.21297	0.00738502	0.0292367	CT009620.1	protein_coding
ENSDARG00000080630	2.21055	0.000413668	0.0033623	NC_002333.6	Mt_tRNA
ENSDARG00000035859	2.20869	8.04348e-06	0.000144341	angptl4	protein_coding
ENSDARG00000038812	2.20674	0.000286542	0.00254353	e2f5	protein_coding
ENSDARG00000061764	2.20656	0.000131592	0.00138306	ahnak	protein_coding
ENSDARG00000078729	2.20609	1.20746e-06	2.94539e-05	ackr4a	protein_coding
ENSDARG00000025436	2.20381	0.00511833	0.0221609	msrb1a	protein_coding
ENSDARG00000076914	2.20378	0.00907467	0.0341951	lacc1	protein_coding
ENSDARG00000055591	2.20297	0.00855335	0.032697	pipox	protein_coding
ENSDARG00000062349	2.19432	2.46043e-05	0.000363061	arhgap15	protein_coding
ENSDARG00000101441	2.19175	1.95212e-05	0.000298883	lima1a	protein_coding
ENSDARG00000015156	2.1916	0.000616637	0.00456202	fbln2	protein_coding
ENSDARG00000041811	2.18856	2.49103e-09	1.47737e-07	rps25	protein_coding
ENSDARG00000003757	2.18842	2.16968e-13	3.34565e-11	cnpy1	protein_coding
ENSDARG00000058992	2.18839	1.85811e-11	1.88323e-09	cers2b	protein_coding
ENSDARG00000013771	2.1883	0.000252638	0.00230611	ctss2.2	protein_coding
ENSDARG00000045023	2.18822	0.0003758	0.00312917	lhfpl5a	protein_coding
ENSDARG00000091902	2.18808	2.30883e-07	7.07998e-06	b3gnt2b	protein_coding
ENSDARG00000040072	2.18758	1.73437e-10	1.39188e-08	scpep1	protein_coding
ENSDARG00000036700	2.18391	1.72585e-05	0.000270965	si:ch211-114n24.6	protein_coding
ENSDARG00000076251	2.17979	0.00116898	0.00736384	irf3	protein_coding
ENSDARG00000099491	2.17951	5.09955e-09	2.69554e-07	tmem176l.1	protein_coding
ENSDARG00000036044	2.17682	5.72452e-12	6.6086e-10	rps20	processed_transcript
ENSDARG00000100693	2.1767	4.31893e-05	0.000571306	ddr2a	protein_coding
ENSDARG00000117448	2.17656	8.62771e-09	4.14404e-07	CABZ01072245.1	lincRNA
ENSDARG00000067831	2.17638	0.00548947	0.0233327	tbata	protein_coding
ENSDARG00000007682	2.17626	0.00252496	0.0130466	ppdpfa	protein_coding
ENSDARG00000009387	2.17093	5.08457e-06	9.85329e-05	robo4	protein_coding
ENSDARG00000054827	2.1703	0.00558032	0.0236459	ssuh2.4	protein_coding
ENSDARG00000103748	2.16774	0.00166552	0.00959572	ovca2	protein_coding
ENSDARG00000071036	2.16659	6.39929e-06	0.00011992	si:dkey-286j15.3	protein_coding
ENSDARG00000086314	2.16555	0.00025896	0.00235386	CU633991.1	protein_coding
ENSDARG00000015278	2.16508	1.74213e-18	6.59808e-16	plxnc1	protein_coding
ENSDARG00000040314	2.16206	3.93781e-07	1.12002e-05	psph	protein_coding
ENSDARG00000090965	2.1617	1.42911e-05	0.000231793	ripk3	protein_coding
ENSDARG00000088924	2.15932	0.000192206	0.0018578	si:dkey-185e18.7	protein_coding
ENSDARG00000039830	2.15876	1.52697e-08	6.6729e-07	gng5	protein_coding
ENSDARG00000018266	2.15679	0.00104956	0.00680417	mthfd1a	protein_coding
ENSDARG00000056125	2.15674	0.00111183	0.00709491	myct1a	protein_coding
ENSDARG00000069037	2.15663	0.000646262	0.00471972	akip1	protein_coding
ENSDARG00000020761	2.15661	3.01601e-08	1.19907e-06	arrdc2	protein_coding
ENSDARG00000102588	2.15379	0.00276606	0.0139518	sp100.2	protein_coding
ENSDARG00000018688	2.15242	1.60679e-09	1.00543e-07	elk3	protein_coding
ENSDARG00000008816	2.14992	7.50034e-06	0.000136524	glud1a	protein_coding
ENSDARG00000070155	2.14946	1.0234e-05	0.00017717	tuba8l3	protein_coding
ENSDARG00000013539	2.14901	0.000180723	0.00177097	ikzf1	protein_coding
ENSDARG00000055753	2.14843	0.00461772	0.0205245	suv39h1b	protein_coding
ENSDARG00000059259	2.14504	1.35162e-05	0.000222061	pabpc4	protein_coding
ENSDARG00000103979	2.14356	1.80843e-13	2.82901e-11	calr3a	protein_coding
ENSDARG00000055966	2.14108	2.52615e-15	5.50854e-13	cflara	protein_coding
ENSDARG00000078912	2.13952	1.22726e-05	0.000205661	si:ch73-24k9.2	protein_coding
ENSDARG00000075891	2.13947	6.80508e-08	2.46904e-06	sall1b	protein_coding
ENSDARG00000015065	2.13854	0.0013118	0.0080043	c4	protein_coding
ENSDARG00000058598	2.13573	0.00327039	0.015798	sox18	protein_coding
ENSDARG00000086815	2.13504	3.0547e-06	6.50345e-05	MYADM	protein_coding
ENSDARG00000014995	2.13479	4.22754e-08	1.62681e-06	jagn1b	protein_coding
ENSDARG00000036412	2.13293	0.00919896	0.0345489	si:ch211-81a5.5	protein_coding
ENSDARG00000102744	2.13279	0.0128826	0.0443625	mgst3a	protein_coding
ENSDARG00000029071	2.13064	8.89178e-11	7.61729e-09	creld2	protein_coding
ENSDARG00000003931	2.12898	1.1456e-12	1.55543e-10	cndp2	protein_coding
ENSDARG00000007950	2.12825	0.00558405	0.0236555	itga11b	protein_coding
ENSDARG00000035682	2.12701	0.00701637	0.0281185	FP102018.1	protein_coding
ENSDARG00000032469	2.127	0.00196269	0.0108184	ampd3b	protein_coding
ENSDARG00000104856	2.12694	0.00533884	0.0228771	si:ch211-260e23.7	protein_coding
ENSDARG00000053455	2.1261	0.00429565	0.0194208	ccdc103	protein_coding
ENSDARG00000100599	2.12585	0.00433941	0.0195491	c1s	protein_coding
ENSDARG00000037891	2.1249	1.05779e-07	3.61324e-06	mlx	protein_coding
ENSDARG00000086996	2.12316	3.61296e-05	0.000493337	si:ch73-234b20.5	protein_coding
ENSDARG00000058105	2.12014	3.46233e-07	1.00194e-05	rpl36a	protein_coding
ENSDARG00000017400	2.11911	0.00485572	0.021293	klf1	protein_coding
ENSDARG00000060248	2.11887	8.88778e-10	5.90367e-08	fgd4b	protein_coding
ENSDARG00000099042	2.11834	0.00444296	0.0199365	cfap157	protein_coding
ENSDARG00000077918	2.11696	0.0016869	0.00969304	dnase2b	protein_coding
ENSDARG00000098772	2.11545	0.00835239	0.0321182	gig2d	protein_coding
ENSDARG00000022493	2.1134	0.0112371	0.0402902	rad21l1	protein_coding
ENSDARG00000052429	2.11079	2.58096e-07	7.74934e-06	syngr2a	protein_coding
ENSDARG00000068702	2.10675	0.000934244	0.00621908	lysmd4	protein_coding
ENSDARG00000042793	2.10613	1.78098e-07	5.67075e-06	tpp1	protein_coding
ENSDARG00000104077	2.106	7.91143e-07	2.05279e-05	fcer1gl	protein_coding
ENSDARG00000012600	2.10529	0.00524761	0.0225893	HELZ2	protein_coding
ENSDARG00000007823	2.10339	1.11503e-06	2.75101e-05	atf3	protein_coding
ENSDARG00000069681	2.10333	0.000150789	0.00152905	pcgf6	protein_coding
ENSDARG00000022165	2.10291	0.000467524	0.00368758	mgst1.2	protein_coding
ENSDARG00000102431	2.10163	0.000487128	0.0037937	CT027744.2	antisense
ENSDARG00000069467	2.10103	0.000288139	0.00255466	igsf9bb	protein_coding
ENSDARG00000102640	2.09783	1.36855e-23	1.05515e-20	pdia3	protein_coding
ENSDARG00000042094	2.09609	1.14914e-05	0.000195335	eef2a.1	protein_coding
ENSDARG00000014793	2.09592	2.12322e-09	1.27677e-07	ehd1b	protein_coding
ENSDARG00000117295	2.09459	0.0140709	0.047352	AL929210.2	lincRNA
ENSDARG00000058638	2.0934	3.59766e-06	7.44644e-05	si:ch211-71m22.1	protein_coding
ENSDARG00000063612	2.09111	5.98427e-06	0.000113125	antxr1c	protein_coding
ENSDARG00000014106	2.09106	0.00013264	0.00139272	cfl2	protein_coding
ENSDARG00000062374	2.0884	7.89945e-06	0.000142467	leng9	protein_coding
ENSDARG00000101675	2.08825	0.000984872	0.00647819	zgc:123107	protein_coding
ENSDARG00000016122	2.08681	4.46363e-07	1.25307e-05	ptrhd1	protein_coding
ENSDARG00000028088	2.0859	1.83378e-05	0.000284803	galk1	protein_coding
ENSDARG00000060668	2.08551	0.00415395	0.0189349	tm4sf18	protein_coding
ENSDARG00000024537	2.08025	0.00376446	0.0176323	emilin1a	protein_coding
ENSDARG00000002213	2.07981	0.00411787	0.0188158	invs	protein_coding
ENSDARG00000059001	2.07947	1.41261e-05	0.000229635	pim2	protein_coding
ENSDARG00000054632	2.07914	0.000138377	0.0014342	fli1a	protein_coding
ENSDARG00000034988	2.07903	0.00016828	0.00168187	asb4	protein_coding
ENSDARG00000087195	2.07728	0.00032745	0.00282082	rorc	protein_coding
ENSDARG00000002401	2.07644	6.79442e-10	4.61251e-08	gale	protein_coding
ENSDARG00000055290	2.07512	0.00132256	0.00805855	mpeg1.1	protein_coding
ENSDARG00000078221	2.0738	0.00189626	0.0105506	si:ch211-204d2.4	protein_coding
ENSDARG00000031317	2.07246	1.17877e-10	9.86329e-09	ppdpfb	protein_coding
ENSDARG00000069945	2.07035	0.00126823	0.00782245	p2ry12	protein_coding
ENSDARG00000030753	2.0698	0.000628817	0.00462833	prrg4	protein_coding
ENSDARG00000004647	2.06968	0.00592247	0.0246875	spice1	protein_coding
ENSDARG00000055416	2.06892	0.00143946	0.00859375	serpinb1	protein_coding
ENSDARG00000093412	2.06826	3.60612e-05	0.000492714	sertad2a	protein_coding
ENSDARG00000057698	2.06786	3.51636e-11	3.37383e-09	ctsd	protein_coding
ENSDARG00000005993	2.06577	0.00670361	0.0271668	prc1b	protein_coding
ENSDARG00000077138	2.06554	3.94921e-09	2.18045e-07	zgc:195173	protein_coding
ENSDARG00000076144	2.06436	4.27464e-05	0.00056712	si:ch211-74m13.3	protein_coding
ENSDARG00000091280	2.06341	0.00478739	0.0210747	si:ch211-66k16.27	protein_coding
ENSDARG00000100968	2.06302	1.08131e-05	0.000185411	si:ch211-1a19.3	protein_coding
ENSDARG00000016427	2.06209	0.000130201	0.00137178	fignl1	protein_coding
ENSDARG00000042010	2.06072	0.0134036	0.0456974	pklr	protein_coding
ENSDARG00000059342	2.05867	0.00100376	0.00658037	avil	protein_coding
ENSDARG00000002304	2.05745	0.0012095	0.00754427	gins2	protein_coding
ENSDARG00000054447	2.05702	0.0144913	0.0484481	slc29a1b	protein_coding
ENSDARG00000055784	2.05349	1.77584e-05	0.000277184	ptpn3	protein_coding
ENSDARG00000007130	2.05248	4.09198e-08	1.58311e-06	mrto4	protein_coding
ENSDARG00000074362	2.05233	0.000779211	0.00542808	zgc:165582	protein_coding
ENSDARG00000062040	2.05108	0.00399214	0.0183915	atp8b5a	protein_coding
ENSDARG00000061941	2.05067	0.000510911	0.00393724	trpv4	protein_coding
ENSDARG00000036445	2.04965	0.00102178	0.00667214	serpinh2	protein_coding
ENSDARG00000034975	2.04898	0.0029316	0.0145878	gpr157	protein_coding
ENSDARG00000007836	2.04802	8.31795e-11	7.21156e-09	ctsla	protein_coding
ENSDARG00000022807	2.04506	0.000326457	0.00281452	zgc:101640	protein_coding
ENSDARG00000104899	2.04467	0.000108176	0.00117944	CR931813.2	processed_transcript
ENSDARG00000040009	2.0441	4.71297e-05	0.00061253	palld	protein_coding
ENSDARG00000057598	2.04126	5.4878e-07	1.48833e-05	s100b	protein_coding
ENSDARG00000059931	2.04104	0.0119893	0.0421333	hyal2a	protein_coding
ENSDARG00000111315	2.03799	0.0056842	0.0239501	CT583642.2	protein_coding
ENSDARG00000005673	2.03516	0.000862772	0.00584632	f3b	protein_coding
ENSDARG00000012581	2.03328	4.33509e-08	1.66227e-06	AL590149.1	antisense
ENSDARG00000007971	2.03168	0.0137424	0.0465486	cks1b	protein_coding
ENSDARG00000104197	2.03124	0.000581764	0.00436081	ptpn22	protein_coding
ENSDARG00000070391	2.03075	0.00213624	0.0115063	tspan4b	protein_coding
ENSDARG00000097206	2.0306	0.0144337	0.0482942	BX324206.1	lincRNA
ENSDARG00000070057	2.03003	1.55298e-05	0.000249077	si:dkey-69o16.5	protein_coding
ENSDARG00000020759	2.02995	3.66628e-11	3.4828e-09	elf1	protein_coding
ENSDARG00000040080	2.02926	3.90466e-05	0.00052624	fli1b	protein_coding
ENSDARG00000070121	2.0286	0.00504868	0.0219209	rhoh	protein_coding
ENSDARG00000097011	2.02853	0.0018126	0.0102168	hbaa1	protein_coding
ENSDARG00000041232	2.02747	3.38851e-09	1.89511e-07	rps29	protein_coding
ENSDARG00000102850	2.02708	0.00869988	0.0331532	CU469577.1	lincRNA
ENSDARG00000024204	2.02691	3.65479e-06	7.53577e-05	mcm3	protein_coding
ENSDARG00000091111	2.02507	1.16634e-08	5.38009e-07	si:ch211-15b10.6	protein_coding
ENSDARG00000045530	2.02485	0.00418987	0.0190503	si:ch211-244b2.4	protein_coding
ENSDARG00000053058	2.02461	4.3453e-09	2.35104e-07	rps11	protein_coding
ENSDARG00000076557	2.02285	0.000378609	0.00314968	bicc2	protein_coding
ENSDARG00000034897	2.02134	3.18084e-10	2.3843e-08	rps10	protein_coding
ENSDARG00000045254	2.0211	3.76609e-05	0.000509854	zmp:0000000624	protein_coding
ENSDARG00000034771	2.02048	1.16199e-05	0.000197092	rab13	protein_coding
ENSDARG00000008765	2.01717	1.49952e-13	2.43397e-11	tmed5	protein_coding
ENSDARG00000070012	2.01354	4.81491e-08	1.82679e-06	sesn2	protein_coding
ENSDARG00000099056	2.01343	2.94669e-06	6.29834e-05	CABZ01065076.1	protein_coding
ENSDARG00000054616	2.01046	0.0013528	0.00819651	cldni	protein_coding
ENSDARG00000071082	2.01021	0.000746022	0.00526655	p4ha1b	protein_coding
ENSDARG00000036427	2.00889	8.43064e-09	4.08898e-07	slc3a2a	protein_coding
ENSDARG00000099667	2.00579	0.000227833	0.00212736	snrpg	protein_coding
ENSDARG00000017579	2.00541	0.012875	0.0443436	si:ch211-195b15.7	protein_coding
ENSDARG00000093804	2.0048	0.000311802	0.00271638	sst6	protein_coding
ENSDARG00000009743	2.0048	0.00076585	0.0053714	efhc1	protein_coding
ENSDARG00000074501	2.00401	0.00365874	0.0172569	tnip2	protein_coding
ENSDARG00000102435	2.00357	0.00886347	0.0335928	plekhf1	protein_coding
ENSDARG00000043877	2.00109	0.0107463	0.0388724	mmachc	protein_coding
ENSDARG00000033273	2.0007	0.0088474	0.0335555	primpol	protein_coding
ENSDARG00000059908	2.00069	1.57156e-06	3.70218e-05	si:ch211-217k17.7	protein_coding
ENSDARG00000005464	1.99848	0.00172934	0.00988167	dnase1l1	protein_coding
ENSDARG00000043509	1.99822	8.44335e-09	4.08898e-07	rpl11	protein_coding
ENSDARG00000042894	1.99812	0.00124773	0.00773576	tyms	protein_coding
ENSDARG00000012450	1.99751	1.50845e-17	4.65205e-15	vmp1	protein_coding
ENSDARG00000056203	1.99725	5.42413e-05	0.000687184	si:ch211-201h21.5	protein_coding
ENSDARG00000019507	1.99642	1.95089e-06	4.42858e-05	mcm5	protein_coding
ENSDARG00000032725	1.99639	9.50151e-10	6.24797e-08	rps27a	protein_coding
ENSDARG00000004618	1.99632	0.00195688	0.0108027	stx2a	protein_coding
ENSDARG00000114963	1.99601	0.0115363	0.0410039	BX901962.4	protein_coding
ENSDARG00000052277	1.99367	0.0013355	0.00811507	cabp2b	protein_coding
ENSDARG00000042458	1.99341	3.84554e-07	1.09667e-05	rfc4	protein_coding
ENSDARG00000101848	1.99333	0.0011919	0.00746032	dydc2	protein_coding
ENSDARG00000099476	1.99179	4.3883e-13	6.53343e-11	zgc:174863	protein_coding
ENSDARG00000006052	1.99101	3.19165e-05	0.000446541	malt2	protein_coding
ENSDARG00000105037	1.98981	5.86008e-07	1.58134e-05	snrpf	protein_coding
ENSDARG00000103682	1.98869	0.000210744	0.00199692	si:dkey-23i12.5	processed_transcript
ENSDARG00000094557	1.98823	0.0139058	0.0469518	nupr1b	protein_coding
ENSDARG00000023299	1.98776	1.65638e-10	1.33425e-08	snu13b	protein_coding
ENSDARG00000102211	1.98571	0.0144271	0.0482798	csf3a	protein_coding
ENSDARG00000062929	1.98528	1.25358e-11	1.32658e-09	FAM83G	protein_coding
ENSDARG00000054304	1.9825	4.89511e-05	0.000631862	homeza	protein_coding
ENSDARG00000108937	1.982	0.000150357	0.00152744	FO704750.1	protein_coding
ENSDARG00000091101	1.98073	0.0117752	0.0416182	fabp10b	protein_coding
ENSDARG00000003527	1.98062	7.52459e-07	1.96422e-05	mak16	protein_coding
ENSDARG00000093702	1.9795	0.000122668	0.00130579	si:dkey-126g1.9	protein_coding
ENSDARG00000037000	1.97842	0.00217639	0.0116586	fkbp11	protein_coding
ENSDARG00000045141	1.97837	0.00347467	0.016572	aqp8a.1	protein_coding
ENSDARG00000034852	1.97729	0.0135449	0.0460427	nt5c2l1	protein_coding
ENSDARG00000102119	1.97615	0.00424596	0.0192526	si:ch73-359m17.2	protein_coding
ENSDARG00000074760	1.97308	0.00611217	0.0253068	ttc7a	protein_coding
ENSDARG00000097208	1.9705	2.1246e-06	4.77769e-05	alkbh3	protein_coding
ENSDARG00000009484	1.97029	6.04782e-10	4.15797e-08	arf1	protein_coding
ENSDARG00000070029	1.96847	0.000320024	0.00277457	ehhadh	protein_coding
ENSDARG00000052074	1.96777	1.54396e-07	4.99714e-06	si:ch211-122f10.4	protein_coding
ENSDARG00000074321	1.96678	0.0029857	0.014794	tead3a	protein_coding
ENSDARG00000010316	1.96626	5.29739e-09	2.76232e-07	qars	protein_coding
ENSDARG00000077285	1.96523	0.00181162	0.010214	scarf1	protein_coding
ENSDARG00000033466	1.96518	3.28092e-05	0.000457253	tagln2	protein_coding
ENSDARG00000087869	1.96239	1.86496e-08	7.86344e-07	si:ch211-11k18.4	protein_coding
ENSDARG00000040186	1.95902	0.000361564	0.00304255	fam210ab	protein_coding
ENSDARG00000061385	1.95541	0.0130197	0.044671	haus3	protein_coding
ENSDARG00000071426	1.95213	4.62685e-05	0.000603532	lrrc59	protein_coding
ENSDARG00000076568	1.9519	1.90725e-06	4.33865e-05	sec61b	protein_coding
ENSDARG00000014907	1.95075	0.00380574	0.0177746	htra1b	protein_coding
ENSDARG00000043531	1.95007	1.41119e-07	4.6089e-06	jun	protein_coding
ENSDARG00000053136	1.9497	7.08171e-09	3.49839e-07	b2m	protein_coding
ENSDARG00000101894	1.94896	6.55361e-08	2.38582e-06	stk10	protein_coding
ENSDARG00000077677	1.9489	5.82948e-05	0.00072576	pdgfd	protein_coding
ENSDARG00000074776	1.94874	0.00212578	0.0114671	tmem154	protein_coding
ENSDARG00000004392	1.94855	0.0105727	0.0384056	hdr	protein_coding
ENSDARG00000055232	1.94703	0.00349716	0.0166476	fancc	protein_coding
ENSDARG00000089463	1.94697	0.00887626	0.0336298	dhx58	protein_coding
ENSDARG00000087457	1.94677	0.0115397	0.0410039	ecscr	protein_coding
ENSDARG00000061737	1.9458	0.00137535	0.00829589	ece1	protein_coding
ENSDARG00000034541	1.94284	0.000457971	0.00363861	tgfbr2b	protein_coding
ENSDARG00000053457	1.94259	4.61618e-09	2.4728e-07	rpl23	protein_coding
ENSDARG00000055996	1.94154	1.34943e-08	6.04387e-07	rps8a	protein_coding
ENSDARG00000028336	1.94119	0.00391631	0.0181427	dhdhl	protein_coding
ENSDARG00000042124	1.93982	3.97174e-09	2.18729e-07	si:dkey-4e7.3	protein_coding
ENSDARG00000105433	1.93968	0.0146736	0.0489302	zgc:172143	protein_coding
ENSDARG00000028173	1.93716	1.07415e-05	0.000184477	slc4a2a	protein_coding
ENSDARG00000103791	1.93641	8.86109e-10	5.90367e-08	nme2b.1	protein_coding
ENSDARG00000026682	1.93243	0.000388003	0.00320436	zgc:101583	protein_coding
ENSDARG00000092870	1.92987	5.89704e-06	0.000111769	BX936337.1	lincRNA
ENSDARG00000073765	1.92972	0.0031337	0.0153159	gna13a	protein_coding
ENSDARG00000094097	1.92966	2.38801e-06	5.25512e-05	CR936321.1	processed_transcript
ENSDARG00000015752	1.92852	0.000924738	0.00617484	zap70	protein_coding
ENSDARG00000034291	1.92785	1.0225e-08	4.77786e-07	rpl37	protein_coding
ENSDARG00000099741	1.92706	0.00221268	0.0118061	mvb12a	protein_coding
ENSDARG00000069998	1.92705	0.000930433	0.00620327	si:ch211-145b13.6	protein_coding
ENSDARG00000099315	1.92504	0.00215213	0.0115659	nsdhl	protein_coding
ENSDARG00000089162	1.92291	0.00975973	0.0361271	afap1l1a	protein_coding
ENSDARG00000091931	1.92146	2.88224e-05	0.000412338	gpatch4	protein_coding
ENSDARG00000071304	1.92089	0.0106782	0.0386844	tbc1d2	protein_coding
ENSDARG00000043357	1.91826	6.35474e-09	3.22033e-07	tbl2	protein_coding
ENSDARG00000030408	1.91744	2.53402e-09	1.49672e-07	rps26l	protein_coding
ENSDARG00000045989	1.91711	3.84121e-06	7.83042e-05	arf4a	protein_coding
ENSDARG00000033029	1.91687	8.95809e-06	0.000158125	pkd1b	protein_coding
ENSDARG00000007711	1.91495	0.000819653	0.0056245	rab3il1	protein_coding
ENSDARG00000015422	1.91451	3.43746e-06	7.16984e-05	ppil1	protein_coding
ENSDARG00000077717	1.91407	2.47094e-07	7.48143e-06	rpl29	protein_coding
ENSDARG00000012066	1.91315	6.44318e-05	0.000783418	dcn	protein_coding
ENSDARG00000061845	1.91309	1.06187e-05	0.000182805	si:dkeyp-110e4.6	protein_coding
ENSDARG00000111714	1.91277	1.86785e-06	4.26249e-05	zgc:112271	protein_coding
ENSDARG00000037397	1.91181	3.88554e-19	1.64473e-16	ssrp1a	protein_coding
ENSDARG00000042864	1.91175	4.41488e-09	2.38271e-07	rpl7l1	protein_coding
ENSDARG00000100260	1.91105	0.000395061	0.00324774	them6	protein_coding
ENSDARG00000101911	1.90948	0.0013943	0.00839145	si:dkeyp-86d6.2	protein_coding
ENSDARG00000070161	1.907	2.0004e-05	0.000305407	vamp3	protein_coding
ENSDARG00000039082	1.90568	3.30746e-08	1.30074e-06	zgc:123010	protein_coding
ENSDARG00000023532	1.90537	2.31241e-05	0.000344301	pinx1	protein_coding
ENSDARG00000020541	1.90423	5.69627e-06	0.000108824	ism1	protein_coding
ENSDARG00000077054	1.9029	0.000865594	0.00585598	fam198b	protein_coding
ENSDARG00000103917	1.90177	0.0118491	0.0418107	znf185	protein_coding
ENSDARG00000010160	1.90019	9.1566e-08	3.21419e-06	rps15a	protein_coding
ENSDARG00000087193	1.89992	0.00203804	0.0110852	prrg2	protein_coding
ENSDARG00000035832	1.89911	0.000765302	0.0053693	pyyb	protein_coding
ENSDARG00000018569	1.89851	7.23129e-05	0.000855392	tnfrsf1a	protein_coding
ENSDARG00000043511	1.89785	3.30972e-10	2.4638e-08	prdx6	protein_coding
ENSDARG00000006220	1.89491	4.16347e-05	0.000553454	ugt1a1	protein_coding
ENSDARG00000036316	1.89415	2.97868e-07	8.76071e-06	rpl39	protein_coding
ENSDARG00000097247	1.89386	1.56976e-05	0.000251208	BX322555.3	lincRNA
ENSDARG00000030602	1.89359	2.19093e-08	9.04356e-07	rps19	protein_coding
ENSDARG00000078152	1.89317	0.00350982	0.0166968	si:dkey-56i24.1	protein_coding
ENSDARG00000112294	1.8928	0.0129734	0.0445759	thsd1	protein_coding
ENSDARG00000068367	1.89274	9.86546e-08	3.43823e-06	nfkbie	protein_coding
ENSDARG00000103118	1.89266	2.40767e-07	7.34134e-06	cib1	protein_coding
ENSDARG00000079932	1.89192	6.38296e-08	2.33156e-06	zgc:152830	protein_coding
ENSDARG00000020007	1.89189	0.00354044	0.0168232	col1a2	protein_coding
ENSDARG00000039217	1.89104	0.000248173	0.00227112	orc1	protein_coding
ENSDARG00000057683	1.88939	1.95151e-08	8.13306e-07	mcm6	protein_coding
ENSDARG00000016939	1.88923	3.39181e-10	2.50761e-08	itgb2	protein_coding
ENSDARG00000100348	1.88921	0.00123	0.00764339	si:dkey-71l4.1	protein_coding
ENSDARG00000021838	1.88846	5.37865e-07	1.46424e-05	rps23	protein_coding
ENSDARG00000099194	1.88336	0.00288557	0.0144098	CABZ01058261.1	protein_coding
ENSDARG00000071062	1.88318	2.16822e-05	0.000326868	hps5	protein_coding
ENSDARG00000091003	1.88132	0.00249782	0.0129498	il34	protein_coding
ENSDARG00000079078	1.88098	0.00260904	0.0133754	si:ch211-5k11.8	protein_coding
ENSDARG00000021864	1.88074	5.48403e-09	2.83907e-07	rplp1	protein_coding
ENSDARG00000054389	1.88019	0.00522287	0.0225052	rhof	protein_coding
ENSDARG00000023298	1.87915	3.32296e-05	0.000461326	rps27.1	protein_coding
ENSDARG00000070835	1.87821	0.0003057	0.00267944	tnnc2	protein_coding
ENSDARG00000020405	1.87575	1.23836e-08	5.6639e-07	napab	protein_coding
ENSDARG00000097019	1.87512	0.000189646	0.00184038	dhrs13b	protein_coding
ENSDARG00000091699	1.8748	3.42257e-05	0.00047242	capn2a	protein_coding
ENSDARG00000060457	1.87263	7.49286e-05	0.00087863	pmp22b	protein_coding
ENSDARG00000101362	1.87254	0.00717268	0.0285954	mibp	protein_coding
ENSDARG00000061600	1.87232	4.51094e-05	0.000590553	cemip2	protein_coding
ENSDARG00000077620	1.87193	0.000571033	0.00429934	cdca7a	protein_coding
ENSDARG00000058062	1.87187	2.333e-08	9.53879e-07	magt1	protein_coding
ENSDARG00000114670	1.87177	0.00729067	0.0289696	ube2c	protein_coding
ENSDARG00000057884	1.86947	0.00169046	0.00970576	zgc:114174	protein_coding
ENSDARG00000018980	1.86911	1.27353e-06	3.08216e-05	zgc:91890	protein_coding
ENSDARG00000015628	1.86858	2.82054e-06	6.08289e-05	psmd10	protein_coding
ENSDARG00000099645	1.86803	0.00360442	0.0170636	zgc:153184	protein_coding
ENSDARG00000077414	1.86716	0.00547335	0.0233009	zgc:194312	protein_coding
ENSDARG00000017960	1.86418	6.19124e-06	0.000116629	sfxn2	protein_coding
ENSDARG00000056619	1.8638	1.77062e-11	1.8202e-09	arhgap42a	protein_coding
ENSDARG00000034933	1.86279	0.00293061	0.0145875	chchd3b	protein_coding
ENSDARG00000043154	1.86277	0.000264903	0.0023988	ucp2	protein_coding
ENSDARG00000089922	1.86187	0.00196477	0.010823	dsn1	protein_coding
ENSDARG00000117133	1.86114	1.64681e-09	1.02453e-07	cst14b.1	protein_coding
ENSDARG00000102746	1.86002	7.74146e-08	2.78074e-06	tmem39a	protein_coding
ENSDARG00000014386	1.85352	0.000209887	0.00199166	galnt6	protein_coding
ENSDARG00000101126	1.85204	0.000102684	0.00112927	atad5b	protein_coding
ENSDARG00000116334	1.85021	0.00483964	0.0212484	tmem17	protein_coding
ENSDARG00000009160	1.84968	0.00234858	0.0123812	kmo	protein_coding
ENSDARG00000033738	1.84903	4.56926e-08	1.74278e-06	zgc:153867	protein_coding
ENSDARG00000033175	1.8489	1.82998e-07	5.79261e-06	snrpe	protein_coding
ENSDARG00000105629	1.84271	0.00497337	0.0216768	BX470211.1	lincRNA
ENSDARG00000036629	1.84129	1.39082e-07	4.56306e-06	rps14	protein_coding
ENSDARG00000026350	1.84066	1.58344e-05	0.000252836	wasb	protein_coding
ENSDARG00000070849	1.83247	1.6642e-07	5.32247e-06	rps15	protein_coding
ENSDARG00000009212	1.83191	1.11966e-08	5.18697e-07	ppiaa	protein_coding
ENSDARG00000115082	1.83165	0.0013103	0.00800092	CABZ01057928.1	protein_coding
ENSDARG00000061196	1.82859	0.000361503	0.00304255	emilin2a	protein_coding
ENSDARG00000100588	1.82838	2.44575e-07	7.42052e-06	rpl36	protein_coding
ENSDARG00000035695	1.82545	0.0011068	0.00707749	scxa	protein_coding
ENSDARG00000090524	1.82292	0.00417209	0.0189975	f2rl2	protein_coding
ENSDARG00000043453	1.82261	8.94144e-12	9.74888e-10	rps5	protein_coding
ENSDARG00000099148	1.8221	0.00019872	0.00190835	bzw1b	protein_coding
ENSDARG00000055797	1.82099	0.000851333	0.00578847	cnpy4	protein_coding
ENSDARG00000079745	1.8195	2.60531e-08	1.05522e-06	si:ch211-166a6.5	protein_coding
ENSDARG00000099555	1.81934	2.61958e-08	1.05902e-06	foxo1a	protein_coding
ENSDARG00000043141	1.817	0.00847883	0.0324944	si:ch211-132f19.7	protein_coding
ENSDARG00000100836	1.81595	0.00783234	0.0305372	CR790380.1	TEC
ENSDARG00000035860	1.81525	2.46466e-06	5.40174e-05	rps28	protein_coding
ENSDARG00000095556	1.81425	0.000117428	0.00125746	CR318588.4	processed_transcript
ENSDARG00000099362	1.8131	0.00123156	0.00764871	CABZ01088346.1	protein_coding
ENSDARG00000101495	1.81234	0.00208117	0.01128	ugt5b2	protein_coding
ENSDARG00000005230	1.81137	7.95648e-12	8.80843e-10	ssr2	protein_coding
ENSDARG00000036106	1.81121	0.00145636	0.00868257	rgs18	protein_coding
ENSDARG00000041991	1.81103	1.92547e-08	8.05565e-07	rrp9	protein_coding
ENSDARG00000010432	1.80987	3.49826e-05	0.000481329	eaf2	protein_coding
ENSDARG00000005679	1.80944	0.00152727	0.00899119	trip10a	protein_coding
ENSDARG00000092856	1.80645	6.59114e-06	0.000123194	si:ch211-210c8.7	protein_coding
ENSDARG00000028295	1.80572	0.000751528	0.00529504	mkrn4	protein_coding
ENSDARG00000009702	1.80539	0.00782534	0.0305154	ascl1b	protein_coding
ENSDARG00000100334	1.80531	0.00657085	0.0267605	BX784026.1	protein_coding
ENSDARG00000068580	1.80525	0.000283231	0.00252244	glis1a	protein_coding
ENSDARG00000069497	1.8041	1.44549e-05	0.000234098	sumf2	protein_coding
ENSDARG00000023062	1.80404	0.00575971	0.0241626	cyr61	protein_coding
ENSDARG00000093677	1.80286	0.00454767	0.0202967	si:ch211-56a11.2	protein_coding
ENSDARG00000005791	1.80076	1.28474e-08	5.81446e-07	rpl28	protein_coding
ENSDARG00000077291	1.80074	5.43538e-11	4.88912e-09	rps2	protein_coding
ENSDARG00000078503	1.80069	3.55181e-05	0.000487382	si:dkey-76b14.2	protein_coding
ENSDARG00000073756	1.79863	5.05319e-06	9.80129e-05	slc12a7a	protein_coding
ENSDARG00000074613	1.79711	0.00630691	0.0259044	si:ch211-240l19.6	protein_coding
ENSDARG00000006468	1.79636	0.00125479	0.00776397	grap2a	protein_coding
ENSDARG00000087087	1.79598	0.000807778	0.00557362	col28a1b	protein_coding
ENSDARG00000077785	1.79502	7.29983e-07	1.91947e-05	atf5b	protein_coding
ENSDARG00000068177	1.79356	3.8832e-11	3.62902e-09	pak2a	protein_coding
ENSDARG00000035879	1.79336	2.75302e-05	0.00039754	fuca1.2	protein_coding
ENSDARG00000006413	1.79306	3.31519e-06	6.98227e-05	rpl38	protein_coding
ENSDARG00000040362	1.79206	0.00857478	0.0327575	ehd2b	protein_coding
ENSDARG00000070565	1.78455	0.00216726	0.0116269	adap2	protein_coding
ENSDARG00000040621	1.78388	0.00115498	0.00728842	lrrc32	protein_coding
ENSDARG00000040041	1.78309	0.000326329	0.00281452	mcm4	protein_coding
ENSDARG00000079009	1.7827	3.7501e-05	0.000508205	abca1b	protein_coding
ENSDARG00000008022	1.7817	0.00906012	0.0341522	kif18a	protein_coding
ENSDARG00000005115	1.78163	3.96855e-07	1.12728e-05	calub	protein_coding
ENSDARG00000039347	1.78013	2.84797e-08	1.14279e-06	rps24	protein_coding
ENSDARG00000020197	1.78009	8.54357e-11	7.37754e-09	rpl5a	protein_coding
ENSDARG00000030824	1.77692	0.00267579	0.0136399	esyt2a	protein_coding
ENSDARG00000035018	1.77594	0.00127849	0.00786326	thy1	protein_coding
ENSDARG00000015557	1.77517	2.01735e-06	4.55074e-05	zgc:100829	protein_coding
ENSDARG00000076667	1.77319	1.22788e-05	0.000205661	ccng1	protein_coding
ENSDARG00000103181	1.77088	0.00666484	0.0270401	si:dkey-34d22.1	protein_coding
ENSDARG00000052515	1.7702	0.00269947	0.0137217	calcoco2	protein_coding
ENSDARG00000057556	1.76981	5.16585e-11	4.68573e-09	rpl17	protein_coding
ENSDARG00000070046	1.76639	1.45972e-06	3.47437e-05	eny2	protein_coding
ENSDARG00000087303	1.76457	0.000257027	0.00234122	cebpd	protein_coding
ENSDARG00000042566	1.76393	1.82296e-07	5.77887e-06	rps7	protein_coding
ENSDARG00000009939	1.76358	0.00289589	0.0144513	micu2	protein_coding
ENSDARG00000115271	1.76164	9.788e-07	2.45988e-05	zgc:171772	protein_coding
ENSDARG00000006260	1.76035	3.81164e-11	3.57763e-09	tuba8l4	protein_coding
ENSDARG00000045352	1.76003	1.20494e-12	1.60569e-10	cst14a.2	protein_coding
ENSDARG00000044402	1.75847	7.39881e-06	0.000135017	nop16	protein_coding
ENSDARG00000056532	1.7583	0.000671357	0.00485699	serinc2	protein_coding
ENSDARG00000038557	1.75698	4.18132e-06	8.42037e-05	anks3	protein_coding
ENSDARG00000061375	1.75667	1.05494e-11	1.1387e-09	sgpl1	protein_coding
ENSDARG00000098130	1.75429	1.86234e-05	0.000287583	bola3	protein_coding
ENSDARG00000015128	1.75374	2.069e-12	2.61202e-10	rpl27	protein_coding
ENSDARG00000056453	1.75287	4.21986e-07	1.19239e-05	afap1l1b	protein_coding
ENSDARG00000004697	1.75197	0.000306146	0.00268117	rxrgb	protein_coding
ENSDARG00000077410	1.75154	3.63588e-07	1.04655e-05	myo9b	protein_coding
ENSDARG00000018491	1.75094	1.22761e-18	4.81848e-16	pdia4	protein_coding
ENSDARG00000074201	1.74976	2.01991e-10	1.57992e-08	flna	protein_coding
ENSDARG00000044540	1.74967	1.85779e-07	5.86343e-06	fkbp2	protein_coding
ENSDARG00000009285	1.74508	5.07988e-11	4.6272e-09	rpl15	protein_coding
ENSDARG00000068759	1.74271	0.00210549	0.0113747	si:ch211-244o22.2	protein_coding
ENSDARG00000025581	1.74233	4.17973e-09	2.29598e-07	rpl10	protein_coding
ENSDARG00000029533	1.74069	8.63821e-09	4.14404e-07	rpl18	protein_coding
ENSDARG00000056795	1.73943	0.00922531	0.0346238	serpine1	protein_coding
ENSDARG00000040465	1.73935	5.92495e-07	1.59611e-05	irf2	protein_coding
ENSDARG00000055868	1.73863	8.77772e-10	5.86667e-08	rsl1d1	protein_coding
ENSDARG00000105142	1.73803	4.85413e-12	5.72629e-10	tcirg1b	protein_coding
ENSDARG00000094899	1.73792	0.00408536	0.0186972	si:ch1073-143l10.2	protein_coding
ENSDARG00000040815	1.73748	0.00013864	0.00143616	tsku	protein_coding
ENSDARG00000071555	1.73569	0.0100434	0.0369303	zgc:153675	protein_coding
ENSDARG00000074829	1.73509	0.00446278	0.0200047	rasip1	protein_coding
ENSDARG00000043865	1.73381	0.000235308	0.00218018	timm9	protein_coding
ENSDARG00000021720	1.73367	0.00626108	0.02578	col7a1	protein_coding
ENSDARG00000104809	1.73364	2.07142e-05	0.000313809	top1mt	protein_coding
ENSDARG00000025820	1.73156	0.00236813	0.0124569	chek2	protein_coding
ENSDARG00000062081	1.73106	3.19281e-09	1.81173e-07	tbc1d1	protein_coding
ENSDARG00000013082	1.72988	0.000797045	0.00551671	uap1l1	protein_coding
ENSDARG00000117533	1.72929	0.00841109	0.0322979	nadsyn1	lincRNA
ENSDARG00000102911	1.72925	0.00423941	0.0192391	iffo2b	protein_coding
ENSDARG00000027986	1.72817	0.000515224	0.00395824	slc35d1b	protein_coding
ENSDARG00000060010	1.72806	7.37503e-06	0.000134811	iqgap2	protein_coding
ENSDARG00000100698	1.72735	0.00289506	0.0144506	oscp1a	protein_coding
ENSDARG00000054818	1.72673	4.64318e-08	1.76474e-06	rpl32	protein_coding
ENSDARG00000113393	1.72558	0.0070166	0.0281185	golim4a	protein_coding
ENSDARG00000058734	1.72415	0.000242693	0.00223709	prdx1	protein_coding
ENSDARG00000099534	1.72268	0.00454489	0.0202885	CABZ01066926.1	protein_coding
ENSDARG00000058212	1.72213	2.01307e-06	4.54583e-05	ndnl2	protein_coding
ENSDARG00000068288	1.72094	0.0104872	0.0381718	lamc2	protein_coding
ENSDARG00000071487	1.72084	0.0090891	0.0342316	zgc:152948	protein_coding
ENSDARG00000094984	1.7195	0.00238456	0.0125129	si:ch211-197g15.8	protein_coding
ENSDARG00000058348	1.71804	1.575e-05	0.000251674	scinlb	protein_coding
ENSDARG00000105046	1.71758	0.00575551	0.0241546	ccnf	protein_coding
ENSDARG00000069264	1.71718	0.00186375	0.0104179	si:ch211-196h16.5	protein_coding
ENSDARG00000043781	1.71688	1.02245e-10	8.65592e-09	psmb10	protein_coding
ENSDARG00000038068	1.71662	1.32949e-07	4.38855e-06	ddx5	protein_coding
ENSDARG00000011405	1.7139	6.2801e-09	3.19565e-07	rps9	protein_coding
ENSDARG00000013056	1.7125	0.00969883	0.0359695	itpk1a	protein_coding
ENSDARG00000105551	1.71222	0.00394293	0.0182391	si:cabz01101003.1	protein_coding
ENSDARG00000035692	1.7122	1.18931e-12	1.59471e-10	rps3a	protein_coding
ENSDARG00000112579	1.71136	6.33857e-05	0.000773091	cmss1	protein_coding
ENSDARG00000004378	1.7105	2.50534e-06	5.47422e-05	yrk	protein_coding
ENSDARG00000054340	1.70996	0.000396533	0.00325611	sla1	protein_coding
ENSDARG00000019417	1.70879	1.81048e-08	7.69294e-07	gadd45ga	protein_coding
ENSDARG00000053530	1.7065	0.00401794	0.0184732	cyp4f3	protein_coding
ENSDARG00000067718	1.70351	0.00200454	0.0109693	si:dkey-3h3.3	protein_coding
ENSDARG00000043304	1.70324	1.51487e-10	1.23408e-08	nop2	protein_coding
ENSDARG00000056615	1.70283	8.86872e-11	7.61729e-09	cybb	protein_coding
ENSDARG00000045372	1.70042	2.75883e-07	8.23757e-06	ngdn	protein_coding
ENSDARG00000025850	1.69941	2.5531e-07	7.69782e-06	rps21	protein_coding
ENSDARG00000019791	1.69929	5.48753e-11	4.91555e-09	prmt3	protein_coding
ENSDARG00000091656	1.69841	1.66218e-05	0.000263459	lsm8	protein_coding
ENSDARG00000004517	1.6984	2.82381e-05	0.000405967	ppat	protein_coding
ENSDARG00000097425	1.6977	0.0121889	0.0426644	CU638870.1	lincRNA
ENSDARG00000036298	1.6964	1.20546e-07	4.04542e-06	rps13	protein_coding
ENSDARG00000076843	1.69613	2.45871e-05	0.000363055	si:dkey-174i8.1	protein_coding
ENSDARG00000008068	1.69426	0.000246201	0.00225802	tma16	protein_coding
ENSDARG00000071558	1.69419	0.00391367	0.0181344	fblim1	protein_coding
ENSDARG00000062390	1.6935	0.000171522	0.00170322	cdc42ep5	protein_coding
ENSDARG00000103409	1.69185	2.50754e-05	0.000368501	uhrf1	protein_coding
ENSDARG00000019181	1.6915	8.48889e-14	1.46607e-11	rpsa	protein_coding
ENSDARG00000069989	1.6903	0.000314281	0.00273356	bnc2	protein_coding
ENSDARG00000104353	1.69001	8.27569e-08	2.94325e-06	nop58	protein_coding
ENSDARG00000103483	1.68992	1.05222e-06	2.61698e-05	litaf	protein_coding
ENSDARG00000044400	1.68875	0.000581222	0.00436081	wdr78	protein_coding
ENSDARG00000069708	1.68704	0.0001376	0.00142813	cdc34a	protein_coding
ENSDARG00000035120	1.68672	6.80199e-09	3.39126e-07	gldc	protein_coding
ENSDARG00000105364	1.68508	0.00871221	0.0331844	si:ch73-223f5.1	protein_coding
ENSDARG00000087048	1.68434	0.00309792	0.0151995	si:dkey-165n16.1	protein_coding
ENSDARG00000044044	1.68337	0.00140317	0.00843779	rassf2b	protein_coding
ENSDARG00000059075	1.68267	1.00522e-06	2.5204e-05	nip7	protein_coding
ENSDARG00000078888	1.68262	7.46271e-07	1.95516e-05	iqgap1	protein_coding
ENSDARG00000016745	1.68185	3.66093e-06	7.54124e-05	slc35f6	protein_coding
ENSDARG00000102076	1.6794	0.00156629	0.00915349	zgc:158852	protein_coding
ENSDARG00000042272	1.67905	0.00886166	0.0335918	tmem231	protein_coding
ENSDARG00000041505	1.67708	0.000146382	0.00149696	itm2bb	protein_coding
ENSDARG00000062688	1.6768	0.000468864	0.00369658	gpnmb	protein_coding
ENSDARG00000052518	1.67626	5.69061e-08	2.10718e-06	stx4	protein_coding
ENSDARG00000012137	1.67439	0.0116968	0.0413742	cyp46a1.1	protein_coding
ENSDARG00000045705	1.67414	0.00996062	0.0366978	meig1	protein_coding
ENSDARG00000043360	1.6733	0.0038539	0.0179461	dph3	protein_coding
ENSDARG00000037071	1.67304	4.27384e-06	8.55085e-05	rps26	protein_coding
ENSDARG00000006553	1.67168	5.9081e-05	0.000731331	rras	protein_coding
ENSDARG00000020979	1.67141	0.00302222	0.0149333	ripor3	protein_coding
ENSDARG00000092798	1.67122	3.36831e-11	3.26076e-09	ppib	protein_coding
ENSDARG00000045681	1.66902	0.00196343	0.0108184	irf5	protein_coding
ENSDARG00000112337	1.66869	7.28195e-07	1.91711e-05	mindy4b	protein_coding
ENSDARG00000009942	1.66661	0.000517653	0.00397266	cdc6	protein_coding
ENSDARG00000020278	1.66609	8.44767e-09	4.08898e-07	si:dkeyp-120h9.1	protein_coding
ENSDARG00000069432	1.66507	0.00149907	0.00886574	plscr3b	protein_coding
ENSDARG00000074425	1.66481	0.00204801	0.0111367	si:busm1-57f23.1	protein_coding
ENSDARG00000014556	1.66336	4.84262e-05	0.000626377	serpinb1l3	protein_coding
ENSDARG00000005926	1.66062	1.28789e-17	4.08867e-15	ak2	protein_coding
ENSDARG00000100392	1.65985	1.65577e-06	3.86848e-05	rps18	protein_coding
ENSDARG00000035871	1.65647	3.29621e-09	1.86279e-07	rpl30	protein_coding
ENSDARG00000042905	1.65592	5.20409e-09	2.73348e-07	rpl10a	protein_coding
ENSDARG00000071679	1.65578	3.1771e-08	1.25388e-06	mydgf	protein_coding
ENSDARG00000095236	1.6552	0.00123083	0.0076464	CT990618.1	processed_transcript
ENSDARG00000041435	1.65495	1.54768e-07	5.00146e-06	uba52	protein_coding
ENSDARG00000041065	1.65201	0.00582263	0.0243697	hspb1	protein_coding
ENSDARG00000077339	1.65095	0.00120243	0.00750882	ptrh2	protein_coding
ENSDARG00000099439	1.65027	7.15799e-06	0.000131736	serp1	protein_coding
ENSDARG00000087793	1.64902	0.00467813	0.0207252	si:dkey-54n8.2	protein_coding
ENSDARG00000059567	1.64897	0.00105178	0.00681444	si:ch73-281f12.4	protein_coding
ENSDARG00000105575	1.64687	0.00199781	0.0109519	si:dkey-6n21.12	protein_coding
ENSDARG00000088663	1.64679	2.46073e-06	5.3986e-05	lman2lb	protein_coding
ENSDARG00000060246	1.64483	0.00113396	0.0072	slc16a6b	protein_coding
ENSDARG00000099744	1.64376	8.0011e-05	0.000925162	gap43	protein_coding
ENSDARG00000088030	1.64345	2.0086e-07	6.27519e-06	rpl35a	protein_coding
ENSDARG00000061095	1.64295	0.000538346	0.00410119	stk36	protein_coding
ENSDARG00000008363	1.64166	1.36558e-05	0.000224014	mcl1b	protein_coding
ENSDARG00000099104	1.64118	1.17845e-05	0.000199065	rpl24	protein_coding
ENSDARG00000060012	1.64026	0.0137105	0.0464724	f2r	protein_coding
ENSDARG00000021462	1.64005	0.00855517	0.032697	daw1	protein_coding
ENSDARG00000015765	1.63985	6.55637e-05	0.000792491	iah1	protein_coding
ENSDARG00000027930	1.63848	2.08652e-07	6.48112e-06	naprt	protein_coding
ENSDARG00000041110	1.63839	2.19991e-10	1.70221e-08	dnajc3a	protein_coding
ENSDARG00000069543	1.63816	6.79955e-05	0.000815946	galt	protein_coding
ENSDARG00000104708	1.63716	0.000277761	0.00248913	ddx24	protein_coding
ENSDARG00000005772	1.63551	1.23576e-07	4.12327e-06	tsr2	protein_coding
ENSDARG00000037046	1.63477	0.00308465	0.0151482	rad51b	protein_coding
ENSDARG00000020232	1.63389	1.05883e-09	6.87375e-08	eif6	protein_coding
ENSDARG00000090638	1.6324	0.000762988	0.00535655	gp9	protein_coding
ENSDARG00000099022	1.63192	4.46319e-07	1.25307e-05	faua	protein_coding
ENSDARG00000005368	1.63149	0.000160258	0.00161289	mcamb	protein_coding
ENSDARG00000068036	1.63045	0.0126502	0.0437593	tmem119b	protein_coding
ENSDARG00000040251	1.62991	0.00842032	0.0323161	ctsk	protein_coding
ENSDARG00000109164	1.62901	3.52236e-05	0.000484336	CABZ01045617.1	pseudogene
ENSDARG00000010255	1.62896	0.000200582	0.00192366	bin2b	protein_coding
ENSDARG00000045487	1.62892	2.21582e-07	6.81412e-06	rps16	protein_coding
ENSDARG00000029003	1.62842	5.07849e-07	1.39739e-05	eif1axa	protein_coding
ENSDARG00000009779	1.62836	3.71836e-07	1.06606e-05	mcl1a	protein_coding
ENSDARG00000055647	1.62677	0.00609598	0.0252591	ftr82	protein_coding
ENSDARG00000025076	1.62471	0.00356516	0.0169116	marveld2a	protein_coding
ENSDARG00000100242	1.62443	1.81979e-05	0.000283037	dph5	protein_coding
ENSDARG00000006316	1.62408	5.27718e-08	1.97441e-06	rpl23a	protein_coding
ENSDARG00000077721	1.62262	3.28502e-05	0.000457402	knop1	protein_coding
ENSDARG00000016691	1.62191	0.00678445	0.0274275	cd9b	protein_coding
ENSDARG00000102477	1.62157	0.000679567	0.0049016	stard4	protein_coding
ENSDARG00000013307	1.62039	2.65215e-08	1.07018e-06	rpl19	protein_coding
ENSDARG00000103433	1.62015	1.02226e-05	0.00017717	rpl14	protein_coding
ENSDARG00000101844	1.61998	1.28712e-09	8.24521e-08	mibp2	protein_coding
ENSDARG00000104227	1.6199	0.000149823	0.00152278	nop10	protein_coding
ENSDARG00000020448	1.61931	0.00022078	0.00207226	adi1	protein_coding
ENSDARG00000054063	1.6173	2.60585e-07	7.81321e-06	arpc4	protein_coding
ENSDARG00000007377	1.61685	1.62278e-08	7.03467e-07	odc1	protein_coding
ENSDARG00000077768	1.61665	2.75112e-05	0.00039754	malt1	protein_coding
ENSDARG00000102105	1.6164	3.37081e-06	7.06379e-05	dad1	protein_coding
ENSDARG00000103810	1.61526	0.0147911	0.0492079	cacna2d4a	protein_coding
ENSDARG00000069422	1.61443	6.9091e-09	3.43672e-07	nhp2	protein_coding
ENSDARG00000058943	1.61235	0.00156173	0.00913678	cdcp1a	protein_coding
ENSDARG00000093003	1.60924	0.000133576	0.00139711	acy3.1	protein_coding
ENSDARG00000032264	1.60854	0.0107658	0.0389366	mybl2b	protein_coding
ENSDARG00000041959	1.6079	0.00388351	0.0180489	cxcr4b	protein_coding
ENSDARG00000067975	1.60733	1.51528e-05	0.000244301	atp5if1a	protein_coding
ENSDARG00000101636	1.60695	0.00338439	0.0162152	zgc:64201	protein_coding
ENSDARG00000010252	1.60611	0.00491768	0.0214818	jak3	protein_coding
ENSDARG00000054540	1.60564	1.58177e-09	9.92654e-08	imp4	protein_coding
ENSDARG00000003941	1.60387	5.04667e-08	1.90801e-06	rrs1	protein_coding
ENSDARG00000070386	1.60354	3.12135e-07	9.11822e-06	krtcap2	protein_coding
ENSDARG00000019444	1.60343	5.93731e-06	0.000112434	ssr4	protein_coding
ENSDARG00000055678	1.60257	0.000225657	0.00211069	akap12b	protein_coding
ENSDARG00000105325	1.6018	0.00260308	0.0133544	CABZ01044764.1	sense_intronic
ENSDARG00000104531	1.60034	2.23895e-05	0.00033519	zcchc4	protein_coding
ENSDARG00000103713	1.59858	0.0015717	0.00917766	cd248a	protein_coding
ENSDARG00000017605	1.59809	0.000894107	0.00601495	rpp40	protein_coding
ENSDARG00000002613	1.5967	7.11769e-05	0.000846593	rpa3	protein_coding
ENSDARG00000014165	1.59639	2.9067e-07	8.58411e-06	ssr3	protein_coding
ENSDARG00000055314	1.59191	1.43087e-08	6.34283e-07	mcmbp	protein_coding
ENSDARG00000104906	1.59179	0.00908228	0.0342178	mtr	protein_coding
ENSDARG00000054363	1.59165	0.00748912	0.0295189	si:zfos-464b6.2	protein_coding
ENSDARG00000044562	1.59069	3.14123e-06	6.65485e-05	cycsb	protein_coding
ENSDARG00000101259	1.59014	7.41472e-05	0.000872786	hgh1	protein_coding
ENSDARG00000070437	1.58778	5.34344e-06	0.000103271	rpl22	protein_coding
ENSDARG00000077407	1.58697	5.6175e-05	0.000705883	si:dkey-184p18.2	protein_coding
ENSDARG00000075616	1.58621	0.00042461	0.003428	polr2k	protein_coding
ENSDARG00000105116	1.58618	1.24932e-12	1.65462e-10	p4hb	protein_coding
ENSDARG00000025073	1.58457	6.51372e-09	3.27889e-07	rpl18a	protein_coding
ENSDARG00000068257	1.5828	0.0118283	0.0417851	kcne4	protein_coding
ENSDARG00000036074	1.58253	1.16004e-11	1.23975e-09	cebpa	protein_coding
ENSDARG00000051783	1.58211	3.08873e-09	1.75935e-07	rplp0	protein_coding
ENSDARG00000046157	1.58073	2.57736e-07	7.74934e-06	zgc:114188	protein_coding
ENSDARG00000037361	1.58056	2.39046e-06	5.25512e-05	kdelr2b	protein_coding
ENSDARG00000016132	1.5801	1.48866e-05	0.000240547	keap1a	protein_coding
ENSDARG00000091198	1.5792	2.41944e-06	5.31342e-05	urm1	protein_coding
ENSDARG00000012215	1.57796	7.94672e-09	3.89011e-07	umps	protein_coding
ENSDARG00000101919	1.57703	0.00184984	0.0103672	foxj1a	protein_coding
ENSDARG00000014690	1.57662	1.86022e-10	1.47641e-08	rps4x	protein_coding
ENSDARG00000003526	1.57578	4.46168e-09	2.40197e-07	psma5	protein_coding
ENSDARG00000056680	1.57506	2.61121e-05	0.000381399	stc2a	protein_coding
ENSDARG00000020984	1.5718	0.000176221	0.0017377	slc16a10	protein_coding
ENSDARG00000078785	1.57152	2.47046e-05	0.000364291	tmem258	protein_coding
ENSDARG00000103145	1.56967	2.30383e-07	7.0747e-06	cdk2ap2	protein_coding
ENSDARG00000043460	1.56921	4.81085e-07	1.33664e-05	wu:fj39g12	protein_coding
ENSDARG00000035147	1.56917	0.0112114	0.0402379	lrwd1	protein_coding
ENSDARG00000103846	1.56862	6.5585e-11	5.77898e-09	hspa5	protein_coding
ENSDARG00000026577	1.56836	0.00335227	0.0161142	cdk2	protein_coding
ENSDARG00000089088	1.56794	0.00754196	0.029673	BX510940.1	processed_transcript
ENSDARG00000097414	1.5677	0.0108711	0.0392712	si:ch211-106e7.2	protein_coding
ENSDARG00000056152	1.56638	1.40974e-05	0.00022934	fam3c	protein_coding
ENSDARG00000039400	1.56478	3.60264e-06	7.44959e-05	polr1c	protein_coding
ENSDARG00000028816	1.56454	6.51749e-07	1.73275e-05	tmed3	protein_coding
ENSDARG00000009640	1.56236	1.83055e-14	3.65906e-12	psmb1	protein_coding
ENSDARG00000053912	1.5616	9.18233e-07	2.33209e-05	fbl	protein_coding
ENSDARG00000099631	1.56105	8.77133e-06	0.000155835	cmtm6	protein_coding
ENSDARG00000076526	1.55953	1.18919e-05	0.000200373	gar1	protein_coding
ENSDARG00000098387	1.55782	7.47655e-05	0.000877672	tmem176l.3a	protein_coding
ENSDARG00000021579	1.55782	0.0018592	0.0104081	orc5	protein_coding
ENSDARG00000051975	1.5557	0.00187368	0.0104574	cd99	protein_coding
ENSDARG00000041607	1.55537	1.40768e-05	0.000229178	eif4ebp3l	protein_coding
ENSDARG00000016706	1.55512	7.70285e-06	0.000139856	atic	protein_coding
ENSDARG00000102798	1.55407	0.000427689	0.00344308	mcm2	protein_coding
ENSDARG00000061985	1.55331	0.00100704	0.0065974	rbm47	protein_coding
ENSDARG00000022466	1.55277	1.13844e-07	3.84012e-06	clcn5b	protein_coding
ENSDARG00000016156	1.55261	5.34168e-07	1.4597e-05	fam53b	protein_coding
ENSDARG00000003854	1.5514	0.0140055	0.0471832	acsl1b	protein_coding
ENSDARG00000020924	1.55073	0.00173596	0.00990641	myo1ca	protein_coding
ENSDARG00000103720	1.55065	3.83638e-07	1.0955e-05	zgc:162730	protein_coding
ENSDARG00000103007	1.55019	4.29718e-08	1.65067e-06	rps3	protein_coding
ENSDARG00000035559	1.54908	0.00378795	0.0177192	tp53	protein_coding
ENSDARG00000004018	1.54826	0.00911236	0.0343012	si:ch211-236h17.3	protein_coding
ENSDARG00000053365	1.54757	3.08116e-05	0.000433895	rpl31	protein_coding
ENSDARG00000055708	1.54487	0.0124508	0.0432829	timm8b	protein_coding
ENSDARG00000117319	1.54411	0.00699233	0.0280629	CABZ01092746.1	lincRNA
ENSDARG00000018459	1.54332	0.00741401	0.0293246	msrb2	protein_coding
ENSDARG00000040070	1.54303	0.000269271	0.00243121	coil	protein_coding
ENSDARG00000044380	1.54299	0.000587099	0.00438736	rbmx2	protein_coding
ENSDARG00000038847	1.54131	0.00997518	0.0367419	gins3	protein_coding
ENSDARG00000014867	1.54123	2.65837e-09	1.54687e-07	rpl8	protein_coding
ENSDARG00000042990	1.54087	0.0126279	0.0437367	cyp2p10	protein_coding
ENSDARG00000039669	1.53957	0.00436166	0.0196247	TSTA3 (1 of many)	protein_coding
ENSDARG00000099380	1.5395	2.52045e-07	7.60998e-06	rpl13	protein_coding
ENSDARG00000018179	1.5387	0.00176655	0.0100385	acvrl1	protein_coding
ENSDARG00000091821	1.5375	0.000576419	0.00432976	smc6	protein_coding
ENSDARG00000087401	1.53733	0.00213813	0.0115107	slc25a34	protein_coding
ENSDARG00000054128	1.53685	0.000244656	0.00224846	im:7136021	protein_coding
ENSDARG00000069499	1.53637	0.00278575	0.0140249	spag1b	protein_coding
ENSDARG00000040432	1.53611	0.00460988	0.0204981	klf2b	protein_coding
ENSDARG00000036483	1.53572	0.00296455	0.0147157	c1ql3b	protein_coding
ENSDARG00000059357	1.53452	2.23095e-06	4.97539e-05	sarnp	protein_coding
ENSDARG00000092033	1.53393	0.00686493	0.0276912	si:dkey-239h2.3	protein_coding
ENSDARG00000079252	1.53335	0.000460494	0.00364946	fam117ab	protein_coding
ENSDARG00000041006	1.53322	0.00331277	0.0159527	st3gal4	protein_coding
ENSDARG00000070428	1.52977	6.06706e-05	0.000747579	si:dkey-239n17.4	protein_coding
ENSDARG00000099355	1.52961	0.000149614	0.00152137	BX890548.1	processed_transcript
ENSDARG00000092445	1.52939	0.00079031	0.0054824	zgc:153352	protein_coding
ENSDARG00000060263	1.52871	0.00498796	0.0217184	pecam1	protein_coding
ENSDARG00000060830	1.52756	0.00141585	0.00848589	fam83hb	protein_coding
ENSDARG00000010169	1.52676	1.52059e-06	3.59939e-05	myd88	protein_coding
ENSDARG00000100513	1.52653	0.00471903	0.0208332	rps27l	protein_coding
ENSDARG00000023958	1.52603	6.40767e-07	1.71035e-05	rnf181	protein_coding
ENSDARG00000020679	1.52585	6.84353e-12	7.7757e-10	clpp	protein_coding
ENSDARG00000037108	1.52436	9.47885e-07	2.39053e-05	pfdn6	protein_coding
ENSDARG00000041011	1.52318	0.000118708	0.00126864	gemin7	protein_coding
ENSDARG00000100116	1.52213	8.12764e-08	2.90016e-06	mrps24	protein_coding
ENSDARG00000090935	1.52176	3.42152e-06	7.15042e-05	si:dkey-75b17.1	protein_coding
ENSDARG00000037962	1.5202	1.47535e-08	6.50541e-07	psmb7	protein_coding
ENSDARG00000037963	1.52016	0.0130069	0.0446341	nek6	protein_coding
ENSDARG00000038612	1.51992	0.00697883	0.0280348	pih1d3	protein_coding
ENSDARG00000069376	1.51811	0.00963116	0.0357744	tnfsf12	protein_coding
ENSDARG00000092360	1.51776	3.35006e-05	0.00046449	si:ch211-51h9.6	protein_coding
ENSDARG00000079457	1.51705	0.00623356	0.025707	si:dkey-57h18.1	protein_coding
ENSDARG00000055360	1.51695	4.80021e-06	9.40682e-05	llph	protein_coding
ENSDARG00000033999	1.51611	5.15428e-08	1.9419e-06	cyp26a1	protein_coding
ENSDARG00000005049	1.51587	0.000284357	0.00252933	rab20	protein_coding
ENSDARG00000019778	1.51514	6.24081e-11	5.54431e-09	rps6	protein_coding
ENSDARG00000089976	1.51475	4.95343e-06	9.63374e-05	spcs3	protein_coding
ENSDARG00000031981	1.51183	0.000201063	0.00192742	pcbd1	protein_coding
ENSDARG00000077120	1.51083	0.00745883	0.0294479	arid5a	protein_coding
ENSDARG00000078523	1.5093	2.84224e-05	0.000407968	ddr1	protein_coding
ENSDARG00000015394	1.50919	1.79696e-06	4.13568e-05	thoc7	protein_coding
ENSDARG00000044093	1.50842	3.80252e-07	1.08727e-05	rpl13a	protein_coding
ENSDARG00000062083	1.50815	0.000258114	0.00234971	dph7	protein_coding
ENSDARG00000044521	1.50768	4.65105e-09	2.48532e-07	eef1b2	protein_coding
ENSDARG00000019362	1.50701	3.45926e-06	7.19446e-05	ptbp1a	protein_coding
ENSDARG00000097824	1.50633	0.00269727	0.013717	smco4	protein_coding
ENSDARG00000101914	1.50604	0.000612368	0.00453821	metrnla	protein_coding
ENSDARG00000019113	1.50525	2.9204e-07	8.6128e-06	mob3a	protein_coding
ENSDARG00000041723	1.50424	0.0113519	0.0405135	zgc:55461	protein_coding
ENSDARG00000103594	1.50211	1.93054e-07	6.06644e-06	npm3	protein_coding
ENSDARG00000056233	1.5017	0.00427779	0.0193563	zgc:110591	protein_coding
ENSDARG00000046030	1.49892	7.82406e-06	0.000141521	zgc:110339	protein_coding
ENSDARG00000077815	1.49873	5.67783e-05	0.000710568	cdc26	protein_coding
ENSDARG00000038980	1.49843	8.993e-05	0.00102018	txndc12	protein_coding
ENSDARG00000086699	1.4975	6.63351e-06	0.000123665	smim15	protein_coding
ENSDARG00000033757	1.4972	0.00158966	0.00925999	ncaph2	protein_coding
ENSDARG00000112644	1.49667	0.00375898	0.0176219	CU459056.1	protein_coding
ENSDARG00000017658	1.4964	8.46932e-09	4.09028e-07	gmppb	protein_coding
ENSDARG00000010516	1.49607	1.58241e-06	3.71719e-05	rpl21	protein_coding
ENSDARG00000040492	1.49561	7.48613e-07	1.95892e-05	mthfd1b	protein_coding
ENSDARG00000069752	1.49336	0.00165145	0.00952486	ckba	protein_coding
ENSDARG00000036028	1.4932	0.000433576	0.00347957	arrdc3b	protein_coding
ENSDARG00000075952	1.49294	1.9783e-05	0.000302248	mbd2	protein_coding
ENSDARG00000105162	1.49251	0.000197317	0.00189741	CR293509.1	lincRNA
ENSDARG00000062518	1.49139	0.00476379	0.0210051	ulk1a	protein_coding
ENSDARG00000033042	1.49041	0.00179826	0.0101599	ptprja	protein_coding
ENSDARG00000097266	1.49026	0.00938229	0.0351092	AL954322.3	processed_transcript
ENSDARG00000103699	1.48812	6.72487e-10	4.5797e-08	ptpn13	protein_coding
ENSDARG00000058953	1.48676	0.00110527	0.00706979	abcc4	protein_coding
ENSDARG00000063333	1.48511	2.68989e-11	2.65157e-09	nup210	protein_coding
ENSDARG00000044345	1.48466	2.90107e-06	6.20697e-05	cyfip1	protein_coding
ENSDARG00000103612	1.48361	0.0024034	0.0125811	akt2l	protein_coding
ENSDARG00000031435	1.48335	1.31426e-09	8.39147e-08	zgc:56493	protein_coding
ENSDARG00000017780	1.48316	0.00333265	0.0160341	rorcb	protein_coding
ENSDARG00000009653	1.48198	0.00520625	0.0224435	lhfpl2a	protein_coding
ENSDARG00000053496	1.48145	1.28675e-07	4.26047e-06	gemin8	protein_coding
ENSDARG00000068401	1.47951	5.56909e-08	2.06929e-06	yap1	protein_coding
ENSDARG00000029500	1.47872	2.04135e-05	0.000310781	rpl34	protein_coding
ENSDARG00000051957	1.47782	1.09518e-05	0.000187492	selenom	protein_coding
ENSDARG00000058538	1.47758	0.00274625	0.0138876	alcamb	protein_coding
ENSDARG00000101242	1.4767	0.000821081	0.00563072	zcchc14	protein_coding
ENSDARG00000054530	1.47598	1.62577e-17	4.94325e-15	rars	protein_coding
ENSDARG00000044167	1.47418	0.00110245	0.00705801	padi2	protein_coding
ENSDARG00000035129	1.47102	0.000107043	0.00116827	zgc:101858	protein_coding
ENSDARG00000102808	1.47013	6.52158e-05	0.00078917	calr3b	protein_coding
ENSDARG00000007302	1.46864	0.0046796	0.0207252	sh3gl3b	protein_coding
ENSDARG00000059308	1.4681	5.40395e-05	0.000686238	golt1bb	protein_coding
ENSDARG00000006691	1.46769	4.8357e-06	9.4559e-05	rpl12	protein_coding
ENSDARG00000081252	1.46587	0.00218612	0.0116961	dre-mir-16b	miRNA
ENSDARG00000039887	1.46505	5.01905e-12	5.88866e-10	c1qbp	protein_coding
ENSDARG00000077249	1.46404	0.000501988	0.0038828	gmip	protein_coding
ENSDARG00000008986	1.46336	5.6451e-05	0.000707863	e2f7	protein_coding
ENSDARG00000076321	1.46322	0.00498904	0.0217188	col28a2a	protein_coding
ENSDARG00000087779	1.4618	1.35401e-05	0.000222284	pum3	protein_coding
ENSDARG00000023578	1.46165	0.00597285	0.0248731	lpp	protein_coding
ENSDARG00000040064	1.46125	4.73778e-07	1.31973e-05	acp6	protein_coding
ENSDARG00000054823	1.46112	5.03205e-05	0.00064585	id3	protein_coding
ENSDARG00000024828	1.46101	1.11256e-05	0.000189866	tmem134	protein_coding
ENSDARG00000098206	1.46098	8.90741e-05	0.00101207	ptrh1	protein_coding
ENSDARG00000117427	1.46008	0.00570219	0.0239866	AL772373.1	lincRNA
ENSDARG00000017794	1.4584	0.00487267	0.0213413	sdr16c5b	protein_coding
ENSDARG00000036567	1.45701	0.00832739	0.0320391	aanat1	protein_coding
ENSDARG00000112476	1.45664	4.70878e-05	0.00061253	surf2	protein_coding
ENSDARG00000008936	1.45612	1.79069e-07	5.6933e-06	sec11a	protein_coding
ENSDARG00000033370	1.4551	2.37883e-06	5.24558e-05	ppil3	protein_coding
ENSDARG00000069537	1.45501	0.000352837	0.00298366	si:dkey-238c7.16	protein_coding
ENSDARG00000054023	1.45382	0.00405847	0.0186018	ttll6	protein_coding
ENSDARG00000019230	1.4531	4.2061e-10	3.01665e-08	rpl7a	protein_coding
ENSDARG00000037153	1.45304	4.50151e-08	1.71998e-06	atp6ap1b	protein_coding
ENSDARG00000019398	1.45135	1.22714e-09	7.88439e-08	psma6a	protein_coding
ENSDARG00000004757	1.45012	1.60067e-13	2.52228e-11	ybx1	protein_coding
ENSDARG00000030125	1.44968	0.00878381	0.0333868	sox7	protein_coding
ENSDARG00000016649	1.44919	6.9785e-10	4.69321e-08	akr7a3	protein_coding
ENSDARG00000018637	1.44857	0.00412298	0.0188255	sec61g	protein_coding
ENSDARG00000018328	1.44845	0.000137148	0.00142549	rhocb	protein_coding
ENSDARG00000037917	1.44828	0.0109352	0.0394238	itga3a	protein_coding
ENSDARG00000074262	1.44819	2.07808e-11	2.08658e-09	nck1a	protein_coding
ENSDARG00000075385	1.44691	0.00596267	0.024845	LO017852.1	protein_coding
ENSDARG00000060041	1.44427	1.42186e-05	0.000230965	lig1	protein_coding
ENSDARG00000099970	1.44296	0.000599123	0.00445995	CR383676.1	lincRNA
ENSDARG00000063911	1.44263	0.00106663	0.00688287	mt-atp6	protein_coding
ENSDARG00000071196	1.44189	0.0106046	0.0384913	cavin2b	protein_coding
ENSDARG00000078734	1.44052	0.00112092	0.00713818	myo1f	protein_coding
ENSDARG00000040440	1.44001	6.45921e-07	1.7215e-05	snrpd2	protein_coding
ENSDARG00000062263	1.43844	0.00112669	0.00716438	arhgap17b	protein_coding
ENSDARG00000036107	1.43822	0.000183684	0.00179591	txnipa	protein_coding
ENSDARG00000026183	1.43626	3.76741e-09	2.09511e-07	polr2eb	protein_coding
ENSDARG00000101690	1.4355	0.000847911	0.00576708	si:ch73-158p21.2	protein_coding
ENSDARG00000056367	1.43502	1.91465e-05	0.000293771	mpv17l2	protein_coding
ENSDARG00000111188	1.43472	0.00136932	0.00826921	cdaa	protein_coding
ENSDARG00000069099	1.43397	4.79531e-07	1.33404e-05	tmco1	protein_coding
ENSDARG00000008953	1.43368	0.000153688	0.00155474	pofut1	protein_coding
ENSDARG00000101089	1.43358	2.81448e-06	6.0759e-05	gart	protein_coding
ENSDARG00000099306	1.43309	0.000896355	0.0060245	zgc:175088	protein_coding
ENSDARG00000070833	1.43201	0.00126093	0.00779526	lin52	protein_coding
ENSDARG00000045928	1.43188	2.25542e-09	1.3525e-07	psma4	protein_coding
ENSDARG00000102441	1.43161	1.29851e-05	0.000215222	ctnna1	protein_coding
ENSDARG00000063233	1.43153	4.07095e-06	8.24425e-05	baz1a	protein_coding
ENSDARG00000030078	1.4307	0.00368278	0.01734	glipr1b	protein_coding
ENSDARG00000045628	1.43003	0.00750064	0.0295536	rab34a	protein_coding
ENSDARG00000036179	1.42849	0.000303536	0.00266806	myo1ea	protein_coding
ENSDARG00000031795	1.42839	1.91343e-06	4.34812e-05	abcf1	protein_coding
ENSDARG00000059658	1.42827	0.00127308	0.00784562	mrm1	protein_coding
ENSDARG00000020702	1.4256	0.000551618	0.0041813	odf2b	protein_coding
ENSDARG00000070261	1.42414	1.6285e-05	0.000258691	crlf3	protein_coding
ENSDARG00000098600	1.42383	0.00243631	0.0127164	pithd1	protein_coding
ENSDARG00000117233	1.4215	0.0103195	0.0377012	FO704819.1	lincRNA
ENSDARG00000024818	1.41934	0.000150795	0.00152905	rilpl2	protein_coding
ENSDARG00000090063	1.41669	9.07314e-05	0.00102712	fa2h	protein_coding
ENSDARG00000092873	1.41499	9.64079e-05	0.00107675	zgc:193541	protein_coding
ENSDARG00000075954	1.41496	0.00389705	0.0180963	serpinh1a	protein_coding
ENSDARG00000025554	1.4146	9.36641e-06	0.000164258	wdr83os	protein_coding
ENSDARG00000045565	1.41318	4.38922e-08	1.68004e-06	noc4l	protein_coding
ENSDARG00000016048	1.4124	0.00113316	0.007197	gpat3	protein_coding
ENSDARG00000018411	1.41026	0.000336558	0.00287861	mknk1	protein_coding
ENSDARG00000078882	1.41022	0.0113175	0.0404667	slc22a31	protein_coding
ENSDARG00000036888	1.40845	0.0134761	0.0458699	zgc:153935	protein_coding
ENSDARG00000095908	1.40701	0.00024622	0.00225802	sat1a.2	protein_coding
ENSDARG00000018010	1.40663	0.0026826	0.0136649	crtap	protein_coding
ENSDARG00000101707	1.40661	0.0109988	0.0395999	si:ch211-156b7.4	protein_coding
ENSDARG00000019367	1.40482	0.00362035	0.0171207	tgfb3	protein_coding
ENSDARG00000070399	1.40473	1.83778e-05	0.000285219	alg2	protein_coding
ENSDARG00000063686	1.40461	5.309e-05	0.00067577	atp23	protein_coding
ENSDARG00000099313	1.40398	3.9397e-05	0.000530239	naga	protein_coding
ENSDARG00000105463	1.40336	0.00129648	0.00794449	CR352285.1	antisense
ENSDARG00000017811	1.40281	4.36185e-05	0.000576276	si:ch211-210c8.6	protein_coding
ENSDARG00000075709	1.4028	0.00581401	0.0243431	ndufb3	protein_coding
ENSDARG00000055534	1.4015	0.00930366	0.0348572	grk7b	protein_coding
ENSDARG00000086618	1.40024	1.72741e-09	1.06852e-07	psma3	protein_coding
ENSDARG00000071670	1.4001	0.000631265	0.00464161	tma7	protein_coding
ENSDARG00000032296	1.39999	2.99932e-05	0.000425725	pomp	protein_coding
ENSDARG00000004875	1.39985	5.07052e-05	0.000650401	tmc6b	protein_coding
ENSDARG00000006110	1.39937	0.000365717	0.00306135	chrd	protein_coding
ENSDARG00000004930	1.39924	2.0309e-08	8.43054e-07	lmo7a	protein_coding
ENSDARG00000045932	1.39869	5.96582e-05	0.000738053	cpeb1a	protein_coding
ENSDARG00000057241	1.3982	0.0116861	0.0413702	tnfsf10	protein_coding
ENSDARG00000018303	1.39723	0.000823287	0.00563928	etv4	protein_coding
ENSDARG00000022309	1.397	0.00065117	0.00474594	dspa	protein_coding
ENSDARG00000100897	1.39588	4.71173e-05	0.00061253	pdgfrb	protein_coding
ENSDARG00000060390	1.39569	0.00299074	0.0148117	stk26	protein_coding
ENSDARG00000055592	1.39495	0.000799467	0.00552815	capn2b	protein_coding
ENSDARG00000102106	1.39477	0.00078516	0.00546012	tgm1l1	protein_coding
ENSDARG00000087933	1.3938	0.00714474	0.0285138	zgc:174972	protein_coding
ENSDARG00000017910	1.39364	1.00974e-05	0.000175368	pdss1	protein_coding
ENSDARG00000093760	1.3931	0.00334282	0.0160759	si:ch211-197h24.9	protein_coding
ENSDARG00000100357	1.39052	6.83603e-05	0.000818958	si:ch73-44m9.3	protein_coding
ENSDARG00000074790	1.39014	3.67479e-08	1.43456e-06	rab5if	protein_coding
ENSDARG00000008811	1.38895	0.00433271	0.019527	cmtm3	protein_coding
ENSDARG00000006219	1.38789	4.3754e-06	8.72978e-05	gnl3	protein_coding
ENSDARG00000076566	1.38637	0.00169959	0.00974261	kank3	protein_coding
ENSDARG00000030700	1.38537	0.000320864	0.00278073	ctps1a	protein_coding
ENSDARG00000058451	1.38503	2.79289e-09	1.61211e-07	rpl6	protein_coding
ENSDARG00000063701	1.3844	2.87595e-05	0.00041171	rreb1a	protein_coding
ENSDARG00000010732	1.3821	7.10841e-08	2.56616e-06	xrcc4	protein_coding
ENSDARG00000078322	1.38175	0.00432239	0.0195009	col12a1a	protein_coding
ENSDARG00000060169	1.38062	0.0016419	0.00949728	mns1	protein_coding
ENSDARG00000095432	1.38035	0.00402413	0.0184884	BX323074.2	lincRNA
ENSDARG00000044760	1.38034	2.69168e-05	0.000391563	gnaia	protein_coding
ENSDARG00000035506	1.37996	0.0106622	0.038636	entpd2a.1	protein_coding
ENSDARG00000096346	1.37959	0.000362507	0.00304506	si:ch211-85n16.3	protein_coding
ENSDARG00000101176	1.37936	0.0046971	0.0207706	ugt1b7	protein_coding
ENSDARG00000100741	1.37935	0.00432931	0.0195158	cdc20	protein_coding
ENSDARG00000022399	1.37867	0.000141593	0.00145765	ntmt1	protein_coding
ENSDARG00000074119	1.37711	0.000425338	0.0034304	frmpd2	protein_coding
ENSDARG00000075380	1.37592	0.00120851	0.00754029	kri1	protein_coding
ENSDARG00000040443	1.37568	0.000294525	0.00259943	polr2i	protein_coding
ENSDARG00000045620	1.37371	1.63798e-09	1.02198e-07	nansa	protein_coding
ENSDARG00000103054	1.37314	0.000430844	0.00345893	dnm2b	protein_coding
ENSDARG00000035573	1.37203	0.000250547	0.00228993	zgc:86811	protein_coding
ENSDARG00000069295	1.37195	0.00243592	0.0127164	bcl6ab	protein_coding
ENSDARG00000089223	1.36997	0.000375591	0.00312917	ngfrb	protein_coding
ENSDARG00000008238	1.36945	0.000862812	0.00584632	manba	protein_coding
ENSDARG00000096454	1.36837	0.0064726	0.0264441	ap1m2	protein_coding
ENSDARG00000007603	1.36762	3.32314e-09	1.8731e-07	stxbp2	protein_coding
ENSDARG00000001470	1.36723	1.47295e-05	0.000238228	mhc1zea	protein_coding
ENSDARG00000008805	1.36487	5.42167e-06	0.000104503	orc3	protein_coding
ENSDARG00000053217	1.36222	4.82312e-05	0.000624605	cox7a2a	protein_coding
ENSDARG00000017687	1.36215	0.000359495	0.00303129	dnajc5gb	protein_coding
ENSDARG00000023713	1.36213	0.00155604	0.00911584	aqp1a.1	protein_coding
ENSDARG00000045075	1.36204	0.000169262	0.0016882	tmem106a	protein_coding
ENSDARG00000103914	1.36183	8.90145e-06	0.000157383	THEM6	protein_coding
ENSDARG00000063895	1.35987	0.000710451	0.00507351	mt-nd1	protein_coding
ENSDARG00000063914	1.35713	0.00155826	0.00912388	mt-nd3	protein_coding
ENSDARG00000045294	1.35681	2.47607e-05	0.000364869	sh3glb1a	protein_coding
ENSDARG00000035890	1.35596	8.83621e-06	0.000156486	fuca1.1	protein_coding
ENSDARG00000101560	1.35361	5.85142e-06	0.0001111	psma1	protein_coding
ENSDARG00000030608	1.35341	0.000105411	0.00115396	rhogd	protein_coding
ENSDARG00000035167	1.35079	0.00267813	0.0136486	mrpl48	protein_coding
ENSDARG00000053047	1.35	1.44052e-10	1.17795e-08	eif2s2	protein_coding
ENSDARG00000060445	1.34922	1.44335e-05	0.000233926	elp6	protein_coding
ENSDARG00000009001	1.34769	3.94891e-11	3.67453e-09	pdia6	protein_coding
ENSDARG00000003570	1.34767	9.18574e-23	6.39683e-20	hsp90b1	protein_coding
ENSDARG00000059725	1.34625	2.73192e-05	0.000396083	hypk	protein_coding
ENSDARG00000062748	1.34623	3.34168e-06	7.01753e-05	pkn1b	protein_coding
ENSDARG00000020504	1.34586	6.40945e-07	1.71035e-05	h3f3b.1	protein_coding
ENSDARG00000100990	1.34566	0.000237569	0.0021936	nme3	protein_coding
ENSDARG00000043932	1.34486	0.00242239	0.0126678	stmn4l	protein_coding
ENSDARG00000057529	1.34453	0.000938631	0.00624058	itpa	protein_coding
ENSDARG00000096829	1.34381	0.00119839	0.00748796	blvrb	protein_coding
ENSDARG00000004270	1.34321	0.000196308	0.00188939	atl3	protein_coding
ENSDARG00000103163	1.34263	0.000114468	0.0012348	tomm20a	protein_coding
ENSDARG00000059354	1.34172	2.33427e-09	1.3959e-07	glmp	protein_coding
ENSDARG00000012820	1.34151	3.53668e-05	0.000485996	nop56	protein_coding
ENSDARG00000011648	1.34126	0.000706293	0.00505217	snrpd1	protein_coding
ENSDARG00000006242	1.34113	1.01237e-08	4.75111e-07	ptp4a1	protein_coding
ENSDARG00000012603	1.34103	0.00123971	0.0076927	eif3ja	protein_coding
ENSDARG00000037432	1.34042	0.00261144	0.0133814	haus7	protein_coding
ENSDARG00000092677	1.34029	0.00115295	0.00727771	coa6	protein_coding
ENSDARG00000043177	1.33918	0.000910755	0.00609466	lsm1	protein_coding
ENSDARG00000098935	1.33878	2.64854e-05	0.000385807	bxdc2	protein_coding
ENSDARG00000029479	1.33737	0.000638831	0.00468447	zgc:86609	protein_coding
ENSDARG00000104901	1.33681	3.45463e-06	7.19177e-05	ostc	protein_coding
ENSDARG00000036104	1.33667	0.00659733	0.026847	MYO1G	protein_coding
ENSDARG00000078974	1.33627	0.00732285	0.0290759	COA4	protein_coding
ENSDARG00000008592	1.33605	0.00567455	0.0239314	mtmr8	protein_coding
ENSDARG00000013938	1.33487	1.49967e-08	6.576e-07	psmb3	protein_coding
ENSDARG00000068886	1.33453	0.000157486	0.00158791	mrpl14	protein_coding
ENSDARG00000035556	1.33313	4.05228e-05	0.000541675	rps6ka3a	protein_coding
ENSDARG00000102145	1.33216	0.00113588	0.00720582	ccdc77	protein_coding
ENSDARG00000087152	1.33157	0.00552476	0.0234457	sowahd	protein_coding
ENSDARG00000099517	1.33055	0.00130951	0.00799933	adssl1	protein_coding
ENSDARG00000005827	1.33031	4.55458e-11	4.18401e-09	eif2s1a	protein_coding
ENSDARG00000075253	1.32998	7.69213e-09	3.77404e-07	pik3cb	protein_coding
ENSDARG00000002720	1.32973	1.05005e-07	3.59249e-06	utp15	protein_coding
ENSDARG00000036541	1.32805	4.44531e-05	0.000584289	rhbdf1a	protein_coding
ENSDARG00000015805	1.32783	0.0139417	0.0470302	cgnl1	protein_coding
ENSDARG00000003599	1.32719	3.17389e-18	1.14197e-15	rpl3	protein_coding
ENSDARG00000098934	1.32651	3.74828e-05	0.000508205	rrp7a	protein_coding
ENSDARG00000052746	1.3261	1.56648e-13	2.48656e-11	grinab	protein_coding
ENSDARG00000112859	1.32584	0.00271246	0.0137697	RASSF10	protein_coding
ENSDARG00000077605	1.32548	0.00288341	0.0144027	frrs1b	protein_coding
ENSDARG00000097797	1.32394	0.000486681	0.00379158	tomm6	protein_coding
ENSDARG00000035914	1.32314	2.81688e-05	0.000405405	tmem167a	protein_coding
ENSDARG00000067713	1.32293	4.89079e-10	3.46171e-08	snx18a	protein_coding
ENSDARG00000035679	1.32198	2.65516e-07	7.95002e-06	si:rp71-45k5.4	protein_coding
ENSDARG00000040121	1.32067	2.70677e-09	1.56659e-07	psma2	protein_coding
ENSDARG00000037570	1.32059	0.000571174	0.00429934	polr1d	protein_coding
ENSDARG00000007320	1.32058	5.68076e-10	3.956e-08	rpl7	protein_coding
ENSDARG00000016200	1.3204	0.00125305	0.00775926	trib3	protein_coding
ENSDARG00000034957	1.31931	0.000867317	0.00586432	hddc2	protein_coding
ENSDARG00000037654	1.3181	0.000140986	0.00145488	pmm2	protein_coding
ENSDARG00000041619	1.31744	7.91286e-13	1.11649e-10	rack1	protein_coding
ENSDARG00000002690	1.31735	0.0136344	0.0462725	rabif	protein_coding
ENSDARG00000030636	1.31622	0.0044777	0.0200591	tex30	protein_coding
ENSDARG00000028164	1.31345	0.00152918	0.00899831	cst14a.1	protein_coding
ENSDARG00000044102	1.31229	0.00106815	0.00688332	znf593	protein_coding
ENSDARG00000098686	1.31177	0.00136295	0.00824645	tmprss2	protein_coding
ENSDARG00000078807	1.31129	0.00142875	0.00854167	paxx	protein_coding
ENSDARG00000103101	1.30851	0.000328008	0.00282259	NDUFC1	protein_coding
ENSDARG00000056346	1.30699	0.00424551	0.0192526	acap1	protein_coding
ENSDARG00000094258	1.30597	4.37742e-05	0.00057798	commd9	protein_coding
ENSDARG00000005612	1.30514	5.05923e-09	2.6835e-07	aph1b	protein_coding
ENSDARG00000105023	1.30424	0.00106802	0.00688332	selplg	protein_coding
ENSDARG00000054980	1.30305	7.95654e-05	0.000920996	ebna1bp2	protein_coding
ENSDARG00000015862	1.30289	9.26812e-07	2.34561e-05	rpl5b	protein_coding
ENSDARG00000031954	1.30243	0.00626741	0.0257936	rbck1	protein_coding
ENSDARG00000037517	1.30182	0.00421415	0.0191473	slc35c2	protein_coding
ENSDARG00000041430	1.30102	0.0042573	0.0192919	bmp2b	protein_coding
ENSDARG00000046141	1.29983	0.00272943	0.0138219	zgc:162025	protein_coding
ENSDARG00000005058	1.29938	0.00869568	0.0331518	ncapd2	protein_coding
ENSDARG00000090568	1.29864	0.00686378	0.0276912	mrpl52	protein_coding
ENSDARG00000014506	1.29792	1.83189e-06	4.19372e-05	tmem126a	protein_coding
ENSDARG00000002240	1.2976	2.85108e-05	0.000408693	psmb6	protein_coding
ENSDARG00000075795	1.29517	3.95147e-05	0.000531491	nol7	protein_coding
ENSDARG00000011890	1.2934	7.90662e-05	0.000918649	cry4	protein_coding
ENSDARG00000042520	1.29231	6.95141e-05	0.000829558	si:dkey-251i10.3	protein_coding
ENSDARG00000001754	1.29166	0.00497995	0.0216923	noc2l	protein_coding
ENSDARG00000018334	1.29165	7.15358e-05	0.000850394	rpl35	protein_coding
ENSDARG00000025972	1.2893	1.53798e-06	3.63259e-05	mcts1	protein_coding
ENSDARG00000098908	1.28782	0.00915883	0.0344401	CU062501.1	lincRNA
ENSDARG00000098121	1.28757	0.001278	0.00786299	FP101882.1	lincRNA
ENSDARG00000025826	1.28537	0.000689342	0.00494993	gna12a	protein_coding
ENSDARG00000113364	1.28501	0.00189834	0.0105568	CABZ01074307.2	protein_coding
ENSDARG00000054301	1.28491	0.000261259	0.00236977	kti12	protein_coding
ENSDARG00000111877	1.28455	4.01385e-05	0.000537203	bcl7ba	protein_coding
ENSDARG00000102493	1.28448	9.58729e-05	0.00107239	ticam1	protein_coding
ENSDARG00000086911	1.28442	1.25441e-05	0.000208791	si:dkey-100n23.5	protein_coding
ENSDARG00000058225	1.28427	2.19299e-05	0.000330142	arpc4l	protein_coding
ENSDARG00000029064	1.28426	1.95859e-06	4.43209e-05	uqcrq	protein_coding
ENSDARG00000015930	1.28354	1.00031e-05	0.000174011	rwdd1	protein_coding
ENSDARG00000006029	1.28352	3.33453e-06	7.00933e-05	lta4h	protein_coding
ENSDARG00000004059	1.28323	0.00376735	0.017642	galk2	protein_coding
ENSDARG00000076602	1.28298	4.94842e-05	0.000636713	prss16	protein_coding
ENSDARG00000089917	1.28232	0.014516	0.0484947	sh3tc2	protein_coding
ENSDARG00000063572	1.2823	0.000351471	0.00297435	perp	protein_coding
ENSDARG00000037261	1.28117	6.12713e-05	0.000752831	mtap	protein_coding
ENSDARG00000021112	1.28069	0.00278192	0.0140089	c1d	protein_coding
ENSDARG00000055124	1.28068	0.000135807	0.0014136	ccnl1a	protein_coding
[truncated: 4,125 more rows]

## Sheet: SIG_3dpl
ZebrafishGeneID	log2FoldChange	pvalue	padj	ZebrafishGeneName	gene_biotype
ENSDARG00000116524	10.3784	3.87123e-07	6.05564e-06	zgc:103700	protein_coding
ENSDARG00000059049	9.35036	2.47703e-06	3.18998e-05	zgc:174904	protein_coding
ENSDARG00000093098	9.07266	5.39375e-17	5.24071e-15	ccl34b.8	protein_coding
ENSDARG00000057173	8.46516	6.86449e-08	1.30115e-06	ifit8	protein_coding
ENSDARG00000103716	8.39491	0.00858535	0.03066	si:busm1-194e12.11	protein_coding
ENSDARG00000099384	8.30185	8.74026e-07	1.24648e-05	si:dkey-238k10.1	protein_coding
ENSDARG00000096979	8.25236	8.57269e-09	1.92398e-07	NPC2 (1 of many)	protein_coding
ENSDARG00000098037	8.18614	3.75418e-05	0.000342394	CU927934.3	lincRNA
ENSDARG00000071643	8.04337	0.00154572	0.00772925	zgc:171490	protein_coding
ENSDARG00000098214	8.01523	0.00161063	0.00799696	CABZ01072487.1	protein_coding
ENSDARG00000096311	7.95784	2.48397e-07	4.10311e-06	si:dkey-211g8.8	protein_coding
ENSDARG00000095112	7.91962	9.11949e-11	3.05714e-09	BX640512.2	processed_transcript
ENSDARG00000117508	7.8528	1.2089e-06	1.66639e-05	CU459056.2	lincRNA
ENSDARG00000007467	7.85206	2.76968e-09	6.86732e-08	ifit10	protein_coding
ENSDARG00000056804	7.84278	6.45328e-10	1.82324e-08	IL4I1	protein_coding
ENSDARG00000071590	7.70426	1.95872e-07	3.31567e-06	si:ch211-236g6.1	protein_coding
ENSDARG00000073994	7.63166	0.000260207	0.0017599	si:ch211-276k2.1	processed_transcript
ENSDARG00000010729	7.4589	5.60807e-29	2.43716e-26	CABZ01073795.1	protein_coding
ENSDARG00000077239	7.42236	4.22413e-11	1.498e-09	si:ch211-165i18.2	protein_coding
ENSDARG00000095384	7.25809	3.17985e-07	5.06699e-06	si:dkey-78l4.2	protein_coding
ENSDARG00000043436	7.16889	3.61879e-16	3.12261e-14	si:dkey-5n18.1	protein_coding
ENSDARG00000076140	7.16796	6.21577e-07	9.26491e-06	clcf1	protein_coding
ENSDARG00000093857	7.13166	2.19417e-10	6.75839e-09	si:dkey-79f11.10	protein_coding
ENSDARG00000100900	7.07797	9.74195e-16	7.86662e-14	si:ch211-183d5.2	protein_coding
ENSDARG00000096906	7.06921	2.43457e-12	1.06188e-10	si:dkey-7i4.24	protein_coding
ENSDARG00000098204	7.06787	1.99147e-15	1.51112e-13	CU984600.2	protein_coding
ENSDARG00000116618	7.01608	1.20042e-07	2.13803e-06	si:ch73-27e22.8	protein_coding
ENSDARG00000086374	6.97503	5.4901e-19	7.13176e-17	isg15	protein_coding
ENSDARG00000090869	6.95005	0.00439629	0.0178586	FO904898.4	protein_coding
ENSDARG00000100904	6.86581	3.60091e-18	4.05985e-16	CABZ01109021.1	protein_coding
ENSDARG00000104015	6.74193	0.00876913	0.0311997	fgfr1bl	protein_coding
ENSDARG00000113386	6.72911	1.68429e-12	7.51082e-11	LO018432.1	protein_coding
ENSDARG00000026895	6.63984	7.99344e-11	2.71006e-09	tor1l3	protein_coding
ENSDARG00000088251	6.60054	7.35072e-14	4.22349e-12	si:ch211-24o10.6	protein_coding
ENSDARG00000014427	6.56805	8.43817e-14	4.76807e-12	mxe	protein_coding
ENSDARG00000071543	6.53779	2.52468e-10	7.64827e-09	si:dkey-42i9.7	protein_coding
ENSDARG00000071644	6.50505	5.02309e-06	5.9466e-05	si:dkey-19a16.7	protein_coding
ENSDARG00000091511	6.42686	2.89229e-10	8.63066e-09	gpx7	protein_coding
ENSDARG00000076182	6.39542	2.93938e-13	1.51416e-11	stat1b	protein_coding
ENSDARG00000062820	6.3881	1.42391e-09	3.74828e-08	irgf3	protein_coding
ENSDARG00000100899	6.33885	8.4575e-20	1.27944e-17	si:ch211-241b2.5	protein_coding
ENSDARG00000079986	6.31075	3.49215e-07	5.51317e-06	BX927329.1	unprocessed_pseudogene
ENSDARG00000116411	6.30331	1.59362e-07	2.75222e-06	RF00017	misc_RNA
ENSDARG00000021688	6.24777	1.23391e-10	4.02049e-09	mxa	protein_coding
ENSDARG00000045661	6.24645	3.59764e-12	1.51927e-10	irf7	protein_coding
ENSDARG00000070038	6.23464	2.21942e-12	9.69809e-11	rbp2a	protein_coding
ENSDARG00000015123	6.23152	2.50586e-07	4.13354e-06	dnase1l4.1	protein_coding
ENSDARG00000092634	6.22942	1.14855e-06	1.5933e-05	CABZ01000634.1	protein_coding
ENSDARG00000111190	6.22623	0.000234025	0.00161108	CR450686.4	protein_coding
ENSDARG00000059254	6.2228	0.00169683	0.00835505	illr1	protein_coding
ENSDARG00000095627	6.20344	4.62169e-37	5.26036e-34	c1qc	protein_coding
ENSDARG00000058673	6.20064	2.30283e-08	4.79881e-07	nkl.1	protein_coding
ENSDARG00000092191	6.19115	9.90439e-10	2.71485e-08	CR318588.1	processed_transcript
ENSDARG00000078731	6.15989	1.59564e-14	1.03638e-12	si:dkey-85k7.12	protein_coding
ENSDARG00000102319	6.15297	2.08966e-08	4.38902e-07	si:dkey-196h17.9	protein_coding
ENSDARG00000101138	6.12514	1.06166e-05	0.000115292	BX323596.1	protein_coding
ENSDARG00000098099	6.12409	3.38742e-11	1.2249e-09	zgc:64065	protein_coding
ENSDARG00000095309	6.10793	5.03643e-09	1.19189e-07	si:dkey-79f11.9	protein_coding
ENSDARG00000044125	6.1073	1.90359e-30	1.10974e-27	txn	protein_coding
ENSDARG00000004953	6.10692	5.382e-11	1.86977e-09	mxb	protein_coding
ENSDARG00000017489	6.10015	7.2027e-16	5.99857e-14	zgc:123068	protein_coding
ENSDARG00000042983	6.09582	0.00145919	0.00737058	has1	protein_coding
ENSDARG00000100339	6.07409	7.832e-09	1.77778e-07	arf4b	protein_coding
ENSDARG00000095005	6.04047	2.6025e-06	3.33361e-05	si:dkey-21e2.10	protein_coding
ENSDARG00000100000	6.03921	9.72947e-11	3.2344e-09	CR352226.5	lincRNA
ENSDARG00000108340	6.02248	6.07713e-31	3.92583e-28	si:ch211-283g2.2	protein_coding
ENSDARG00000103480	6.02132	7.92988e-08	1.48426e-06	BX640512.3	protein_coding
ENSDARG00000088234	5.99286	6.62035e-07	9.81027e-06	si:ch211-217k17.12	protein_coding
ENSDARG00000040295	5.96939	1.38207e-11	5.2352e-10	apoeb	protein_coding
ENSDARG00000087099	5.95711	1.99444e-07	3.36661e-06	si:ch73-106k19.5	protein_coding
ENSDARG00000104635	5.95638	0.000411186	0.00258364	mhc2b	protein_coding
ENSDARG00000078389	5.92771	3.24588e-15	2.37762e-13	si:dkey-188i13.7	protein_coding
ENSDARG00000077559	5.915	4.2004e-07	6.51089e-06	LO017815.1	protein_coding
ENSDARG00000095026	5.8967	4.51911e-06	5.41976e-05	si:dkey-58f10.14	protein_coding
ENSDARG00000089463	5.89525	9.94656e-17	9.21483e-15	dhx58	protein_coding
ENSDARG00000095532	5.88943	4.46345e-24	1.09985e-21	si:dkey-58f10.13	protein_coding
ENSDARG00000101190	5.86471	3.46625e-08	6.99036e-07	cyp2k8	protein_coding
ENSDARG00000039852	5.86345	1.07228e-10	3.53511e-09	ftr93	protein_coding
ENSDARG00000094935	5.84473	2.66737e-12	1.14723e-10	si:dkey-58f10.11	protein_coding
ENSDARG00000110960	5.84241	2.5323e-12	1.09849e-10	BX769173.1	protein_coding
ENSDARG00000095345	5.78218	1.94493e-07	3.29466e-06	ftr09	protein_coding
ENSDARG00000108953	5.77661	9.39464e-28	3.80594e-25	si:ch211-283g2.2	protein_coding
ENSDARG00000094077	5.76379	2.19752e-05	0.000216908	si:dkey-21e2.16	protein_coding
ENSDARG00000056065	5.75734	9.7059e-25	2.7293e-22	mov10b.2	protein_coding
ENSDARG00000044612	5.72962	1.14084e-26	3.89548e-24	c1qb	protein_coding
ENSDARG00000018587	5.70976	2.43196e-10	7.3955e-09	zgc:152658	protein_coding
ENSDARG00000035694	5.70206	1.15428e-08	2.54047e-07	stm	protein_coding
ENSDARG00000039243	5.69788	1.12313e-10	3.68683e-09	zgc:152791	protein_coding
ENSDARG00000077169	5.67514	3.67036e-06	4.5236e-05	si:ch211-153b23.4	protein_coding
ENSDARG00000031359	5.66112	6.50181e-09	1.50588e-07	cmpk2	protein_coding
ENSDARG00000039949	5.65463	2.16845e-05	0.000214529	fibina	protein_coding
ENSDARG00000099325	5.65184	9.31873e-06	0.000102519	gig2i	protein_coding
ENSDARG00000103551	5.64563	1.57391e-15	1.21354e-13	rnf213b	protein_coding
ENSDARG00000057911	5.63959	0.0025258	0.0114579	ACTC1	protein_coding
ENSDARG00000095798	5.59599	1.73327e-10	5.46673e-09	BX666064.1	lincRNA
ENSDARG00000038646	5.58821	3.24601e-09	7.94126e-08	ftr11	protein_coding
ENSDARG00000090167	5.55059	0.000974218	0.00528741	FO904898.1	protein_coding
ENSDARG00000004952	5.54954	2.02363e-10	6.26539e-09	rsad2	protein_coding
ENSDARG00000089432	5.51649	4.24564e-07	6.56399e-06	si:ch211-212k18.15	protein_coding
ENSDARG00000075389	5.51037	2.21339e-18	2.54348e-16	si:ch211-281g13.4	protein_coding
ENSDARG00000102929	5.49139	7.79578e-12	3.08501e-10	zgc:101715	protein_coding
ENSDARG00000093748	5.48927	1.07157e-26	3.71198e-24	si:ch211-217k17.11	protein_coding
ENSDARG00000090730	5.47257	7.17252e-09	1.64685e-07	cfbl	protein_coding
ENSDARG00000074217	5.46959	2.43853e-07	4.03082e-06	si:dkey-188i13.6	protein_coding
ENSDARG00000075757	5.45506	1.12254e-09	3.03529e-08	gig2e	protein_coding
ENSDARG00000111788	5.44568	0.00281375	0.0124684	BX511067.1	protein_coding
ENSDARG00000001452	5.44051	3.91978e-13	1.96829e-11	adam8a	protein_coding
ENSDARG00000099138	5.40665	1.89563e-10	5.91507e-09	btr29	protein_coding
ENSDARG00000044613	5.39662	6.41182e-35	6.38564e-32	c1qa	protein_coding
ENSDARG00000104976	5.39121	5.14929e-09	1.21619e-07	si:ch1073-67j19.2	protein_coding
ENSDARG00000114626	5.39095	0.0030045	0.0131455	RF00017	misc_RNA
ENSDARG00000092259	5.37712	1.29784e-06	1.77668e-05	si:dkey-211g8.5	protein_coding
ENSDARG00000075163	5.3744	1.09452e-13	6.11245e-12	cxcl20	protein_coding
ENSDARG00000055856	5.37048	2.52108e-07	4.15578e-06	tor1l1	protein_coding
ENSDARG00000114409	5.3523	0.00205501	0.00975548	CR450686.5	protein_coding
ENSDARG00000053027	5.33299	2.12224e-24	5.65777e-22	si:dkey-33i11.1	protein_coding
ENSDARG00000094840	5.31617	4.93117e-05	0.000432373	si:dkey-21e2.13	protein_coding
ENSDARG00000024789	5.30733	1.73708e-07	2.97632e-06	mxc	protein_coding
ENSDARG00000078206	5.30101	2.0626e-08	4.336e-07	zgc:171506	protein_coding
ENSDARG00000007199	5.29899	0.000655354	0.00382616	CR846090.1	unprocessed_pseudogene
ENSDARG00000077415	5.28389	1.85884e-07	3.16887e-06	zmp:0000001175	protein_coding
ENSDARG00000056976	5.25692	1.78429e-11	6.66377e-10	ifit16	protein_coding
ENSDARG00000042428	5.22941	6.55152e-14	3.82254e-12	gstt1a	protein_coding
ENSDARG00000097320	5.21065	2.44318e-22	4.99118e-20	CR848791.3	lincRNA
ENSDARG00000043093	5.18469	1.81236e-18	2.12349e-16	mpeg1.2	protein_coding
ENSDARG00000093763	5.18031	2.16278e-05	0.000214146	si:ch211-271e10.6	protein_coding
ENSDARG00000104350	5.14327	9.34815e-08	1.71744e-06	si:dkey-68o6.6	protein_coding
ENSDARG00000078446	5.11377	8.53507e-06	9.51074e-05	ftr07	protein_coding
ENSDARG00000087575	5.11212	3.76462e-13	1.90237e-11	zmp:0000000912	protein_coding
ENSDARG00000061177	5.10228	3.61461e-17	3.55541e-15	mov10b.1	protein_coding
ENSDARG00000074360	5.0976	2.18837e-09	5.54092e-08	ftr57	protein_coding
ENSDARG00000076106	5.09043	1.13546e-13	6.28236e-12	ftr43	protein_coding
ENSDARG00000088019	5.06627	0.00155188	0.00775563	si:ch211-114l13.12	protein_coding
ENSDARG00000000656	5.05105	0.0142453	0.0459502	psmb9a	protein_coding
ENSDARG00000052396	5.04512	9.20903e-13	4.35008e-11	pkz	protein_coding
ENSDARG00000078182	5.04175	3.84918e-08	7.69794e-07	zgc:194443	protein_coding
ENSDARG00000058557	5.04168	0.001332	0.00684826	il11b	protein_coding
ENSDARG00000027529	5.0372	3.05366e-32	2.14672e-29	hmox1a	protein_coding
ENSDARG00000110173	5.00696	2.19241e-08	4.58068e-07	BX323861.3	protein_coding
ENSDARG00000062974	4.98991	4.21238e-07	6.51859e-06	itga2.2	protein_coding
ENSDARG00000111653	4.98919	0.000458173	0.00282832	CABZ01081490.1	protein_coding
ENSDARG00000059410	4.98194	0.000144828	0.00107807	ccr12b.1	protein_coding
ENSDARG00000099672	4.96469	5.86162e-25	1.688e-22	capgb	protein_coding
ENSDARG00000016527	4.96231	8.3732e-12	3.28092e-10	helz2	protein_coding
ENSDARG00000114883	4.95868	0.0001214	0.000932422	CU655961.4	protein_coding
ENSDARG00000025903	4.94296	2.16138e-45	4.30511e-42	lgals9l1	protein_coding
ENSDARG00000058180	4.92859	3.15366e-05	0.000295835	exoc3l4	protein_coding
ENSDARG00000116047	4.92117	6.62136e-12	2.65989e-10	CU459094.3	protein_coding
ENSDARG00000077337	4.91852	0.00148159	0.00746791	si:ch211-171h4.5	protein_coding
ENSDARG00000116586	4.91006	1.38249e-10	4.46543e-09	zgc:92066	protein_coding
ENSDARG00000102514	4.90633	0.000121095	0.000930676	BX323596.2	protein_coding
ENSDARG00000117571	4.90496	3.07854e-06	3.86873e-05	BX927329.2	lincRNA
ENSDARG00000055334	4.90401	0.00921095	0.0324816	zmp:0000000652	protein_coding
ENSDARG00000112907	4.90058	0.000410075	0.00257919	RF00017	misc_RNA
ENSDARG00000091556	4.89	0.000122436	0.000938875	tnfsf13	protein_coding
ENSDARG00000059294	4.87939	1.88168e-48	5.622e-45	marco	protein_coding
ENSDARG00000058206	4.86169	3.89451e-05	0.000352601	si:ch211-153b23.5	protein_coding
ENSDARG00000090873	4.84027	0.000100877	0.000799986	ccl34a.4	protein_coding
ENSDARG00000093440	4.81452	3.82622e-09	9.3036e-08	tnfaip6	protein_coding
ENSDARG00000104865	4.81421	0.000374013	0.0023909	si:dkey-34d22.5	protein_coding
ENSDARG00000059883	4.81298	2.3067e-23	5.33705e-21	trpv1	protein_coding
ENSDARG00000026049	4.80481	1.15115e-09	3.102e-08	mxf	protein_coding
ENSDARG00000100301	4.80032	0.00822726	0.0295889	CABZ01065328.2	protein_coding
ENSDARG00000113891	4.78845	7.75274e-05	0.000637887	RF00017	misc_RNA
ENSDARG00000098602	4.78473	0.000172321	0.00124888	CABZ01001434.1	protein_coding
ENSDARG00000092423	4.78242	6.77426e-09	1.56443e-07	cxcl11.5	protein_coding
ENSDARG00000113172	4.77536	0.000936797	0.00511456	RF00017	misc_RNA
ENSDARG00000089434	4.77411	2.7184e-09	6.74716e-08	etv7	protein_coding
ENSDARG00000076320	4.77155	5.06003e-12	2.08886e-10	ano9a	protein_coding
ENSDARG00000037805	4.76487	5.49677e-06	6.45304e-05	lgals3bpa	protein_coding
ENSDARG00000067661	4.76369	9.81005e-13	4.61575e-11	ftr80	protein_coding
ENSDARG00000092532	4.76285	5.64525e-06	6.61111e-05	si:dkey-21e2.4	protein_coding
ENSDARG00000070280	4.75801	1.95318e-09	5.00373e-08	hist1h2a3	protein_coding
ENSDARG00000094854	4.75425	3.81505e-20	5.92125e-18	ms4a17a.8	protein_coding
ENSDARG00000094983	4.75117	0.000153461	0.00113071	ccl34a.3	protein_coding
ENSDARG00000096898	4.73185	0.000791309	0.00445872	CR925728.1	lincRNA
ENSDARG00000058631	4.71615	1.55655e-06	2.09385e-05	CABZ01030107.1	protein_coding
ENSDARG00000041060	4.71369	6.2904e-58	5.01177e-54	lgals9l3	protein_coding
ENSDARG00000079332	4.71337	2.13481e-29	1.06304e-26	AL928650.1	lincRNA
ENSDARG00000092170	4.68449	8.2373e-09	1.86271e-07	apoc1	protein_coding
ENSDARG00000058753	4.67987	0.0124784	0.0413903	si:ch73-213k20.5	protein_coding
ENSDARG00000021572	4.67959	1.97098e-08	4.15435e-07	mb21d1	protein_coding
ENSDARG00000041382	4.67874	6.85033e-10	1.92405e-08	si:dkey-283b15.2	protein_coding
ENSDARG00000086998	4.67778	1.89137e-17	1.95704e-15	zgc:64002	protein_coding
ENSDARG00000094284	4.6738	1.88681e-18	2.19993e-16	si:dkey-58f10.10	protein_coding
ENSDARG00000095807	4.65918	0.0018355	0.00889362	hp	protein_coding
ENSDARG00000017299	4.65728	3.56937e-08	7.16331e-07	fabp11a	protein_coding
ENSDARG00000113546	4.65715	0.0126123	0.0417015	CU571382.5	lincRNA
ENSDARG00000117654	4.65007	2.21682e-06	2.89385e-05	BX545917.6	lincRNA
ENSDARG00000075975	4.64726	0.00507916	0.0200201	slc45a3	protein_coding
ENSDARG00000040251	4.63933	1.98577e-11	7.34735e-10	ctsk	protein_coding
ENSDARG00000060439	4.635	0.00152984	0.00766871	clcn2c	protein_coding
ENSDARG00000068939	4.61877	3.44731e-29	1.61564e-26	xaf1	protein_coding
ENSDARG00000052332	4.59884	1.71425e-08	3.64537e-07	ftr98	protein_coding
ENSDARG00000102945	4.59324	0.000609731	0.00360291	ccl39.2	protein_coding
ENSDARG00000010962	4.58509	2.27884e-08	4.75295e-07	fkbp7	protein_coding
ENSDARG00000001303	4.57163	0.0143956	0.0463268	psmb8a	protein_coding
ENSDARG00000092266	4.57021	0.00506837	0.0199918	si:ch73-27e22.2	protein_coding
ENSDARG00000105364	4.56705	2.71154e-10	8.16262e-09	si:ch73-223f5.1	protein_coding
ENSDARG00000104176	4.56078	8.2731e-08	1.54126e-06	BX511034.6	protein_coding
ENSDARG00000098774	4.55991	1.21705e-16	1.10608e-14	si:zfos-741a10.3	protein_coding
ENSDARG00000040528	4.55711	7.4811e-95	1.78813e-90	lgals3bpb	protein_coding
ENSDARG00000096300	4.54353	3.81043e-05	0.000346168	CR847785.1	lincRNA
ENSDARG00000038668	4.54298	1.05923e-27	4.15043e-25	gbp1	protein_coding
ENSDARG00000110909	4.5162	9.49579e-15	6.52208e-13	zgc:173552	protein_coding
ENSDARG00000086903	4.51195	5.02577e-13	2.48944e-11	gig2o	protein_coding
ENSDARG00000076789	4.49622	4.37467e-37	5.22817e-34	cx32.2	protein_coding
ENSDARG00000090889	4.49306	7.60098e-37	8.25812e-34	si:ch211-132p1.3	protein_coding
ENSDARG00000092894	4.4875	2.11511e-13	1.12096e-11	si:ch211-114l13.9	protein_coding
ENSDARG00000098231	4.47921	8.6504e-05	0.000701839	hhex	protein_coding
ENSDARG00000105423	4.47225	0.00413343	0.0170076	cd27	protein_coding
ENSDARG00000075626	4.4703	1.99964e-33	1.49361e-30	zgc:172090	protein_coding
ENSDARG00000099693	4.47028	0.00434177	0.0176943	AL935065.1	protein_coding
ENSDARG00000097702	4.46523	2.67264e-17	2.67286e-15	si:ch1073-66l23.1	protein_coding
ENSDARG00000004954	4.45916	3.64164e-34	3.34779e-31	grna	protein_coding
ENSDARG00000097847	4.45098	8.72138e-10	2.40992e-08	si:ch211-269k10.4	protein_coding
ENSDARG00000115038	4.44764	3.42507e-14	2.1154e-12	si:dkey-4c23.5	protein_coding
ENSDARG00000111638	4.4476	2.8462e-07	4.61846e-06	CABZ01040998.1	protein_coding
ENSDARG00000074656	4.44714	2.42398e-22	4.99118e-20	ctss2.1	protein_coding
ENSDARG00000114661	4.43789	2.91619e-19	4.00591e-17	BX321875.4	protein_coding
ENSDARG00000105314	4.42971	1.63178e-12	7.29023e-11	hist1h2a4	protein_coding
ENSDARG00000055365	4.42969	7.66566e-14	4.39387e-12	si:dkey-25e12.3	protein_coding
ENSDARG00000070289	4.42015	1.3142e-12	5.96678e-11	si:ch211-113a14.22	protein_coding
ENSDARG00000096508	4.41656	9.91346e-05	0.000788524	BX322618.1	lincRNA
ENSDARG00000077309	4.41516	3.30839e-19	4.49302e-17	si:ch211-209f23.6	protein_coding
ENSDARG00000092222	4.41085	1.33212e-06	1.81841e-05	wu:fb64b08	protein_coding
ENSDARG00000100942	4.40199	0.000696886	0.00402829	zgc:194655	protein_coding
ENSDARG00000039863	4.39545	6.26845e-19	8.01222e-17	lifrb	protein_coding
ENSDARG00000053387	4.3911	2.47919e-05	0.000240298	CU207281.1	processed_transcript
ENSDARG00000104185	4.38301	7.79208e-10	2.1707e-08	AL831726.2	protein_coding
ENSDARG00000057035	4.38162	1.98798e-09	5.08201e-08	stoml3b	protein_coding
ENSDARG00000040319	4.37763	2.3222e-23	5.33705e-21	CABZ01041494.1	protein_coding
ENSDARG00000068233	4.37729	4.99074e-25	1.45474e-22	zgc:64051	protein_coding
ENSDARG00000089362	4.37026	9.51337e-11	3.17139e-09	grn1	protein_coding
ENSDARG00000036376	4.36522	7.08127e-14	4.08832e-12	cldn7a	protein_coding
ENSDARG00000008098	4.3637	7.95282e-07	1.15485e-05	ifit9	protein_coding
ENSDARG00000110517	4.36062	0.000411097	0.00258364	CU459094.1	protein_coding
ENSDARG00000071139	4.35177	4.6941e-08	9.20413e-07	PLCXD1 (1 of many)	protein_coding
ENSDARG00000111669	4.33178	0.000531925	0.0031969	si:ch73-267c23.10	protein_coding
ENSDARG00000090352	4.32793	1.65039e-08	3.52525e-07	CR855311.1	processed_transcript
ENSDARG00000110288	4.32532	2.46803e-19	3.49058e-17	CT583625.5	protein_coding
ENSDARG00000025043	4.3194	3.03183e-10	9.03577e-09	trip13	protein_coding
ENSDARG00000097526	4.31739	0.00019744	0.00139787	CU466287.2	lincRNA
ENSDARG00000075265	4.31587	4.26691e-05	0.000381405	plaua	protein_coding
ENSDARG00000009702	4.31577	5.75048e-12	2.34553e-10	ascl1b	protein_coding
ENSDARG00000093360	4.31496	8.13035e-14	4.61595e-12	CU469531.2	unprocessed_pseudogene
ENSDARG00000061222	4.30281	4.30454e-29	1.94126e-26	uba7	protein_coding
ENSDARG00000055226	4.30247	1.40044e-10	4.51732e-09	slc7a7	protein_coding
ENSDARG00000089995	4.30189	0.000836871	0.00467795	BX511080.1	protein_coding
ENSDARG00000008182	4.30049	8.87656e-05	0.000716298	si:ch73-111e15.1	protein_coding
ENSDARG00000115525	4.29839	0.000168044	0.00122159	AL929520.3	protein_coding
ENSDARG00000013771	4.28213	3.99561e-19	5.33536e-17	ctss2.2	protein_coding
ENSDARG00000054418	4.2744	2.5122e-14	1.5719e-12	ssuh2.2	protein_coding
ENSDARG00000089388	4.27248	0.00126895	0.00657212	ftr35	protein_coding
ENSDARG00000058647	4.27212	3.09485e-28	1.2754e-25	hck	protein_coding
ENSDARG00000091712	4.26912	1.73451e-17	1.80253e-15	si:dkey-238d18.5	protein_coding
ENSDARG00000043586	4.25356	1.95055e-41	2.91388e-38	fas	protein_coding
ENSDARG00000026236	4.24694	1.33723e-05	0.000140186	zgc:56585	protein_coding
ENSDARG00000009471	4.24635	3.89222e-05	0.000352527	nid2b	protein_coding
ENSDARG00000089661	4.24233	6.93712e-17	6.50239e-15	FO704622.1	protein_coding
ENSDARG00000105232	4.23346	0.00274834	0.0122603	si:ch211-260e23.8	protein_coding
ENSDARG00000098012	4.23164	2.35875e-10	7.20384e-09	itgae.1	protein_coding
ENSDARG00000092778	4.23095	0.00120719	0.00629593	si:ch73-338o16.4	protein_coding
ENSDARG00000103520	4.22899	0.000990845	0.00536547	si:dkey-148a17.5	protein_coding
ENSDARG00000095830	4.21729	4.06105e-30	2.25738e-27	serpinb1l1	protein_coding
ENSDARG00000098918	4.20403	2.33382e-06	3.03498e-05	mcoln2	protein_coding
ENSDARG00000093214	4.19897	4.18298e-12	1.74793e-10	si:ch211-284e13.9	protein_coding
ENSDARG00000041911	4.1945	6.24757e-17	5.94938e-15	si:ch211-245h14.1	protein_coding
ENSDARG00000036942	4.19215	1.28986e-10	4.18889e-09	gpd1c	protein_coding
ENSDARG00000073726	4.18919	0.00173003	0.00848925	zbtb32	protein_coding
ENSDARG00000094747	4.18211	0.00223127	0.0104062	si:ch211-197g15.6	protein_coding
ENSDARG00000058731	4.18094	1.807e-29	9.27865e-27	slc2a6	protein_coding
ENSDARG00000040076	4.1804	2.14472e-15	1.61204e-13	pycard	protein_coding
ENSDARG00000088686	4.18018	2.15716e-15	1.61631e-13	hist1h2a11	protein_coding
ENSDARG00000071012	4.17388	3.65591e-07	5.74892e-06	ifit14	protein_coding
ENSDARG00000013598	4.17044	9.70652e-11	3.23127e-09	tnfb	protein_coding
ENSDARG00000052255	4.1687	0.00304177	0.013291	trim35-3	protein_coding
ENSDARG00000040445	4.16868	1.03599e-57	6.19053e-54	si:ch211-219a4.3	protein_coding
ENSDARG00000042816	4.16481	1.01949e-18	1.2307e-16	mmp9	protein_coding
ENSDARG00000069563	4.1629	9.84513e-08	1.79495e-06	zgc:153151	protein_coding
ENSDARG00000117263	4.15947	1.4121e-15	1.10301e-13	CABZ01056054.1	lincRNA
ENSDARG00000042683	4.14952	0.000174852	0.0012637	si:dkey-15j16.3	protein_coding
ENSDARG00000069945	4.14738	2.61058e-24	6.85693e-22	p2ry12	protein_coding
ENSDARG00000028618	4.14705	5.21568e-09	1.22944e-07	zgc:77517	protein_coding
ENSDARG00000095909	4.14638	2.43932e-51	8.32925e-48	BX539325.1	processed_transcript
ENSDARG00000101785	4.13847	4.047e-19	5.37396e-17	laptm5	protein_coding
ENSDARG00000068653	4.13354	2.67447e-19	3.73831e-17	rhoga	protein_coding
ENSDARG00000094706	4.13275	3.96354e-05	0.000358172	cxcl11.6	protein_coding
ENSDARG00000056654	4.13034	0.000316448	0.00208081	gna15.3	protein_coding
ENSDARG00000041980	4.11337	1.74806e-09	4.51698e-08	calhm6	protein_coding
ENSDARG00000074379	4.11274	1.094e-06	1.52649e-05	knstrn	protein_coding
ENSDARG00000044755	4.1118	7.79793e-19	9.75844e-17	si:dkeyp-87d8.8	protein_coding
ENSDARG00000054805	4.105	8.97643e-10	2.47754e-08	btr09	protein_coding
ENSDARG00000101104	4.09924	2.82006e-19	3.89624e-17	FP102192.1	protein_coding
ENSDARG00000011581	4.09392	2.11139e-14	1.34244e-12	si:dkey-23k10.5	protein_coding
ENSDARG00000042231	4.09245	0.00166218	0.00820518	stx11b.2	protein_coding
ENSDARG00000098772	4.08714	2.58355e-09	6.42582e-08	gig2d	protein_coding
ENSDARG00000098595	4.08293	2.31659e-08	4.82327e-07	hist1h2a11	protein_coding
ENSDARG00000094433	4.08109	1.79042e-11	6.67624e-10	caspbl	protein_coding
ENSDARG00000074782	4.0741	4.00064e-23	9.10698e-21	adgrg3	protein_coding
ENSDARG00000034643	4.07045	1.37021e-15	1.07733e-13	fhl3a	protein_coding
ENSDARG00000115392	4.06657	0.00388048	0.0161644	BX890572.2	protein_coding
ENSDARG00000033594	4.05823	0.000912182	0.00501333	ido1	protein_coding
ENSDARG00000076848	4.05726	0.000747597	0.00425921	LGALS3BP (1 of many)	protein_coding
ENSDARG00000103883	4.05578	1.30658e-05	0.000137456	si:ch1073-181h11.2	protein_coding
ENSDARG00000116946	4.05531	0.00785074	0.0284488	RF00017	misc_RNA
ENSDARG00000095438	4.05217	0.00630084	0.0238522	si:dkey-78l4.4	protein_coding
ENSDARG00000097229	4.04791	0.00466997	0.0187316	si:ch211-226h8.15	protein_coding
ENSDARG00000057949	4.04426	5.79894e-07	8.70096e-06	slc43a3b	protein_coding
ENSDARG00000087978	4.04051	0.00251011	0.0114041	CU657980.2	unprocessed_pseudogene
ENSDARG00000091573	4.03975	4.5583e-11	1.60697e-09	si:ch1073-90m23.1	protein_coding
ENSDARG00000053620	4.03383	0.000101308	0.000802607	ebi3	protein_coding
ENSDARG00000070774	4.0234	5.24007e-11	1.82312e-09	irgf1	protein_coding
ENSDARG00000042722	4.00875	6.24121e-44	1.14752e-40	blnk	protein_coding
ENSDARG00000045561	4.00869	4.13815e-14	2.48518e-12	dram1	protein_coding
ENSDARG00000100662	4.00735	7.57682e-05	0.000625997	cxcl11.1	protein_coding
ENSDARG00000053124	4.00146	6.33901e-17	6.0125e-15	si:dkey-148a17.6	protein_coding
ENSDARG00000100379	3.99997	0.00431833	0.0176138	si:dkey-34d22.2	protein_coding
ENSDARG00000061101	3.99909	3.81939e-05	0.000346851	snx19a	protein_coding
ENSDARG00000110849	3.9932	3.92217e-07	6.1193e-06	RF00017	misc_RNA
ENSDARG00000012405	3.98581	9.16033e-10	2.52538e-08	col1a1a	protein_coding
ENSDARG00000014657	3.98223	4.46747e-12	1.85385e-10	zgc:171731	protein_coding
ENSDARG00000068657	3.97901	1.48926e-06	2.01223e-05	irgq2	protein_coding
ENSDARG00000076870	3.97694	4.38282e-09	1.05184e-07	piezo1	protein_coding
ENSDARG00000053215	3.97666	1.17989e-10	3.85796e-09	me1	protein_coding
ENSDARG00000002956	3.96169	5.08215e-10	1.47241e-08	si:dkey-32n7.4	protein_coding
ENSDARG00000100906	3.96012	2.14783e-13	1.13328e-11	hist1h2a11	protein_coding
ENSDARG00000089404	3.95939	4.92302e-11	1.72284e-09	si:dkey-24p1.7	protein_coding
ENSDARG00000018329	3.95134	8.01625e-05	0.00065618	gc2	protein_coding
ENSDARG00000114169	3.9489	4.18201e-11	1.48526e-09	CR354435.9	protein_coding
ENSDARG00000097189	3.94614	2.79296e-06	3.54527e-05	FP101861.1	lincRNA
ENSDARG00000069769	3.94462	0.0117088	0.0393566	gig2j	protein_coding
ENSDARG00000115875	3.94401	8.11706e-16	6.66714e-14	FP236812.6	protein_coding
ENSDARG00000097031	3.93169	5.3326e-29	2.36037e-26	si:ch73-380l3.3	protein_coding
ENSDARG00000077809	3.93146	1.90286e-05	0.000192314	il13	protein_coding
ENSDARG00000098699	3.92915	0.00706945	0.0261691	si:ch211-11c3.9	protein_coding
ENSDARG00000105400	3.9283	1.71406e-15	1.31734e-13	hist1h2a4	protein_coding
ENSDARG00000095939	3.92478	0.00016577	0.00120844	si:ch73-226l13.2	protein_coding
ENSDARG00000113481	3.92151	3.24805e-06	4.05435e-05	si:ch211-113a14.19	protein_coding
ENSDARG00000055290	3.921	2.64467e-22	5.35703e-20	mpeg1.1	protein_coding
ENSDARG00000069627	3.91979	9.81586e-19	1.20317e-16	si:ch211-255g12.8	protein_coding
ENSDARG00000002165	3.91414	1.44972e-52	5.77519e-49	psme1	protein_coding
ENSDARG00000098970	3.91362	6.31999e-12	2.55601e-10	CU459186.1	protein_coding
ENSDARG00000090444	3.9093	4.69739e-30	2.55175e-27	ponzr1	protein_coding
ENSDARG00000068219	3.90719	8.02796e-06	8.99177e-05	b3gnt2l	protein_coding
ENSDARG00000113519	3.90411	0.00478326	0.0191027	BX088712.2	protein_coding
ENSDARG00000052039	3.89674	1.01966e-07	1.84641e-06	caspb	protein_coding
ENSDARG00000016505	3.89366	4.6622e-21	8.25452e-19	apbb1ip	protein_coding
ENSDARG00000100099	3.89362	2.42014e-10	7.36894e-09	si:dkey-238o14.1	protein_coding
ENSDARG00000117643	3.89352	1.03253e-09	2.81087e-08	CU896641.1	lincRNA
ENSDARG00000105241	3.88902	5.50873e-11	1.91103e-09	btr26	protein_coding
ENSDARG00000020079	3.88346	6.14208e-30	3.2624e-27	neil3	protein_coding
ENSDARG00000075926	3.87802	0.00506382	0.0199827	igfn1.2	protein_coding
ENSDARG00000075785	3.8774	1.9076e-06	2.52607e-05	HERC5	protein_coding
ENSDARG00000101720	3.87669	2.54596e-20	4.08412e-18	HIST2H3D	protein_coding
ENSDARG00000114649	3.87542	2.04236e-09	5.19877e-08	LO018106.1	protein_coding
ENSDARG00000055504	3.87362	1.85926e-58	2.22201e-54	si:ch211-212k18.7	protein_coding
ENSDARG00000062009	3.87193	1.10359e-24	3.06722e-22	gpr18	protein_coding
ENSDARG00000112561	3.8719	8.43814e-12	3.30096e-10	si:dkey-108k21.11	protein_coding
ENSDARG00000078912	3.8697	4.30442e-46	9.3531e-43	si:ch73-24k9.2	protein_coding
ENSDARG00000078205	3.86963	0.00136077	0.00697376	ccl34b.9	protein_coding
ENSDARG00000087736	3.86861	1.39608e-11	5.27993e-10	si:dkey-118k5.3	protein_coding
ENSDARG00000096992	3.86832	3.75068e-10	1.10541e-08	zgc:153405	protein_coding
ENSDARG00000000767	3.86745	3.68341e-21	6.57021e-19	spi1b	protein_coding
ENSDARG00000076969	3.86118	2.28448e-10	7.00047e-09	ftr22	protein_coding
ENSDARG00000032405	3.85962	1.31284e-09	3.47888e-08	ckap4	protein_coding
ENSDARG00000103634	3.85257	0.0104462	0.035833	CU914622.2	protein_coding
ENSDARG00000061769	3.85195	0.00507145	0.0199997	bmp10	protein_coding
ENSDARG00000017504	3.85162	9.81313e-28	3.90922e-25	si:ch211-1o7.3	protein_coding
ENSDARG00000070743	3.84929	0.000683341	0.00395861	tmem45a	protein_coding
ENSDARG00000102594	3.84311	0.00017491	0.0012637	zgc:194627	protein_coding
ENSDARG00000005789	3.83911	1.53062e-08	3.29593e-07	enpp1	protein_coding
ENSDARG00000007018	3.83891	2.25311e-27	8.54824e-25	ms4a17a.6	protein_coding
ENSDARG00000105614	3.83266	0.00224706	0.0104615	si:ch211-212k18.13	protein_coding
ENSDARG00000052515	3.82592	3.41533e-29	1.61564e-26	calcoco2	protein_coding
ENSDARG00000100279	3.82511	1.01011e-06	1.42189e-05	CU457819.1	protein_coding
ENSDARG00000029720	3.82228	2.26456e-16	1.98998e-14	si:dkeyp-9d4.2	protein_coding
ENSDARG00000075045	3.81861	3.1249e-25	9.70019e-23	cxcl18b	protein_coding
ENSDARG00000076586	3.81583	7.08215e-23	1.553e-20	csf2rb	protein_coding
ENSDARG00000015559	3.81462	3.99179e-12	1.67683e-10	fstl1a	protein_coding
ENSDARG00000069244	3.80843	9.66967e-10	2.65355e-08	si:ch211-244b2.3	protein_coding
ENSDARG00000105374	3.80679	1.98474e-10	6.16093e-09	CU457819.3	protein_coding
ENSDARG00000030954	3.80544	4.65594e-10	1.35385e-08	ftr56	protein_coding
ENSDARG00000078859	3.80326	0.00116673	0.00612448	g0s2	protein_coding
ENSDARG00000044155	3.80089	0.00397947	0.0165019	mafaa	protein_coding
ENSDARG00000101169	3.80044	7.27217e-12	2.89699e-10	grap2b	protein_coding
ENSDARG00000030782	3.79597	3.01894e-08	6.15163e-07	exoc3l2b	protein_coding
ENSDARG00000089839	3.7905	0.00710073	0.0262483	BX296541.1	unprocessed_pseudogene
ENSDARG00000093345	3.78906	0.0140095	0.0453241	si:ch73-27e22.7	protein_coding
ENSDARG00000078363	3.78841	5.1676e-06	6.09053e-05	mcoln3a	protein_coding
ENSDARG00000040717	3.78783	1.10034e-21	2.07088e-19	macc1	protein_coding
ENSDARG00000095424	3.7839	0.0132769	0.0435238	si:ch211-133n4.7	protein_coding
ENSDARG00000009673	3.77179	4.62669e-05	0.000408976	si:ch211-197g15.6	protein_coding
ENSDARG00000099409	3.76661	1.0307e-05	0.000112492	zgc:162182	protein_coding
ENSDARG00000041220	3.76541	3.55085e-06	4.39526e-05	ftr53	protein_coding
ENSDARG00000042221	3.76472	2.16302e-18	2.49761e-16	mthfd1l	protein_coding
ENSDARG00000110809	3.76392	0.000153128	0.00112895	hist1h2a2	protein_coding
ENSDARG00000114454	3.76009	4.9197e-08	9.60597e-07	CR762483.1	protein_coding
ENSDARG00000042138	3.75727	0.00204177	0.00970803	selp	protein_coding
ENSDARG00000038541	3.75532	3.55882e-26	1.18143e-23	ccr12a	protein_coding
ENSDARG00000041041	3.75334	1.03246e-25	3.24709e-23	cxcr3.2	protein_coding
ENSDARG00000104980	3.75276	6.91749e-16	5.78118e-14	CU695117.1	protein_coding
ENSDARG00000103677	3.74912	9.16857e-05	0.00073564	CABZ01008730.1	protein_coding
ENSDARG00000115054	3.74292	1.61035e-07	2.7771e-06	CR354435.10	protein_coding
ENSDARG00000092176	3.74187	0.000258093	0.00174956	BX321875.1	processed_transcript
ENSDARG00000024540	3.73693	1.34539e-12	6.09042e-11	tspan36	protein_coding
ENSDARG00000105478	3.7363	1.1186e-13	6.21786e-12	si:ch1073-153i20.5	protein_coding
ENSDARG00000101675	3.73595	9.99223e-19	1.21236e-16	zgc:123107	protein_coding
ENSDARG00000100582	3.73045	4.82708e-05	0.000424961	si:ch211-195b11.3	protein_coding
ENSDARG00000006598	3.72857	0.000119785	0.000923287	sgk2b	protein_coding
ENSDARG00000113707	3.7218	1.08336e-12	5.00858e-11	CR354435.8	protein_coding
ENSDARG00000090396	3.71922	6.29999e-14	3.69981e-12	si:cabz01074946.1	protein_coding
ENSDARG00000024815	3.71754	1.30974e-20	2.2046e-18	ogfrl2	protein_coding
ENSDARG00000045190	3.71674	4.33491e-34	3.83752e-31	ch25h	protein_coding
ENSDARG00000095673	3.71333	8.18421e-07	1.18199e-05	si:dkey-79f11.8	protein_coding
ENSDARG00000097653	3.71033	5.26305e-07	7.97701e-06	si:dkey-23k10.3	protein_coding
ENSDARG00000026726	3.70901	1.29918e-10	4.20771e-09	anxa1a	protein_coding
ENSDARG00000045224	3.7054	0.0019676	0.00942097	glipr1a	protein_coding
ENSDARG00000079267	3.70302	1.39913e-23	3.27863e-21	FERMT3 (1 of many)	protein_coding
ENSDARG00000109648	3.70251	0.000293853	0.00195537	si:ch211-147m6.1	protein_coding
ENSDARG00000092653	3.70062	0.000319779	0.00209464	si:dkey-1h24.6	protein_coding
ENSDARG00000027063	3.69826	5.99661e-22	1.1559e-19	arpc1b	protein_coding
ENSDARG00000045957	3.69669	1.5573e-08	3.34436e-07	gpr65	protein_coding
ENSDARG00000026704	3.69494	6.75976e-16	5.66919e-14	ftr72	protein_coding
ENSDARG00000091926	3.69409	3.02773e-06	3.81089e-05	si:dkey-103e21.5	protein_coding
ENSDARG00000117811	3.69305	0.00656981	0.0247022	BX545917.7	lincRNA
ENSDARG00000075504	3.69225	1.53526e-20	2.56614e-18	si:dkey-40c23.2	protein_coding
ENSDARG00000076251	3.69222	2.28407e-14	1.44091e-12	irf3	protein_coding
ENSDARG00000102034	3.69191	0.0146263	0.0469449	si:ch211-214k5.3	protein_coding
ENSDARG00000092680	3.68673	0.000184803	0.0013229	si:dkey-58f10.12	protein_coding
ENSDARG00000054340	3.68251	2.0878e-17	2.14174e-15	sla1	protein_coding
ENSDARG00000102583	3.67996	9.11207e-23	1.96213e-20	il4r.2	protein_coding
ENSDARG00000096522	3.67867	0.00110492	0.00587017	si:ch211-176g6.1	protein_coding
ENSDARG00000086552	3.67116	8.71819e-10	2.40992e-08	hist1h2a11	protein_coding
ENSDARG00000007769	3.67095	3.38385e-05	0.000313978	sult5a1	protein_coding
ENSDARG00000104045	3.6691	6.34373e-13	3.07562e-11	tlr22	protein_coding
ENSDARG00000093019	3.66884	2.04019e-07	3.43655e-06	si:dkey-83k24.5	protein_coding
ENSDARG00000105484	3.66823	9.30663e-06	0.00010251	FP325123.3	protein_coding
ENSDARG00000039459	3.66724	1.91182e-11	7.09572e-10	qsox1	protein_coding
ENSDARG00000101181	3.66573	0.00059309	0.00351153	s100w	protein_coding
ENSDARG00000078387	3.66528	4.84216e-05	0.000425661	si:dkey-92i15.4	protein_coding
ENSDARG00000033355	3.66442	1.01678e-05	0.000111176	zgc:101699	protein_coding
ENSDARG00000042708	3.66257	1.69221e-11	6.33967e-10	tuba8l	protein_coding
ENSDARG00000095032	3.65929	0.000409909	0.00257901	ftr33	protein_coding
ENSDARG00000105350	3.65891	4.00926e-12	1.68122e-10	si:ch1073-153i20.4	protein_coding
ENSDARG00000105468	3.65711	2.89292e-11	1.05567e-09	zgc:112234	protein_coding
ENSDARG00000088631	3.65293	3.06179e-15	2.25873e-13	BX000363.1	protein_coding
ENSDARG00000042894	3.65102	2.07737e-24	5.64243e-22	tyms	protein_coding
ENSDARG00000112375	3.6458	7.62508e-19	9.59235e-17	CR762436.4	protein_coding
ENSDARG00000059792	3.63956	0.000265106	0.00178848	trpm5	protein_coding
ENSDARG00000112967	3.62774	2.1626e-05	0.000214146	CR762436.5	protein_coding
ENSDARG00000071168	3.62481	1.8555e-05	0.000188084	zmp:0000001138	protein_coding
ENSDARG00000100024	3.62319	1.36498e-09	3.61305e-08	hist1h2a6	protein_coding
ENSDARG00000095789	3.6197	1.6193e-18	1.90663e-16	ccr8.1	protein_coding
ENSDARG00000104795	3.61919	0.00443829	0.0179885	cxcl8a	protein_coding
ENSDARG00000092892	3.61151	1.45116e-08	3.14182e-07	si:dkey-23c22.5	protein_coding
ENSDARG00000038669	3.61054	1.4874e-26	5.00731e-24	gbp2	protein_coding
ENSDARG00000104472	3.6096	4.5354e-13	2.26789e-11	si:ch211-39i2.2	antisense
ENSDARG00000097592	3.60911	6.63685e-05	0.000557981	si:dkey-40c23.1	protein_coding
ENSDARG00000109458	3.60896	1.04124e-07	1.88115e-06	hist1h2a1	protein_coding
ENSDARG00000105667	3.60479	4.40687e-14	2.62676e-12	CU972454.4	lincRNA
ENSDARG00000035632	3.60094	0.0134133	0.0438645	ccl19a.2	protein_coding
ENSDARG00000117355	3.60036	0.0032863	0.0141479	BX545917.2	lincRNA
ENSDARG00000034063	3.60022	9.51659e-16	7.73692e-14	unm_sa911	protein_coding
ENSDARG00000014039	3.59707	0.000845815	0.00471691	si:dkeyp-93d12.1	protein_coding
ENSDARG00000095482	3.59549	0.00108473	0.00577314	si:dkey-26i13.3	protein_coding
ENSDARG00000074012	3.5949	4.91642e-08	9.60597e-07	si:ch1073-159d7.7	protein_coding
ENSDARG00000095801	3.59298	0.00122901	0.00639439	BX649485.2	lincRNA
ENSDARG00000033587	3.59225	0.00528554	0.020643	CABZ01088134.1	protein_coding
ENSDARG00000060662	3.5889	5.43113e-05	0.000469833	prf1.9	protein_coding
ENSDARG00000051718	3.58414	1.38706e-14	9.15845e-13	si:ch211-113a14.24	protein_coding
ENSDARG00000036106	3.5838	3.29072e-14	2.04298e-12	rgs18	protein_coding
ENSDARG00000058045	3.58275	2.16063e-37	2.71808e-34	tlr21	protein_coding
ENSDARG00000070297	3.57506	1.06282e-12	4.93274e-11	CR354435.1	protein_coding
ENSDARG00000096576	3.5729	3.65892e-05	0.000334566	si:ch211-286b5.6	protein_coding
ENSDARG00000112131	3.56448	0.000198534	0.00140312	zgc:173552	protein_coding
ENSDARG00000005414	3.56197	1.46714e-14	9.63392e-13	grapa	protein_coding
ENSDARG00000079387	3.56015	3.04238e-14	1.89373e-12	si:ch211-102c2.4	protein_coding
ENSDARG00000071251	3.55974	1.81535e-11	6.75864e-10	ppp1r18	protein_coding
ENSDARG00000071636	3.55834	3.01084e-20	4.79767e-18	BX511034.2	protein_coding
ENSDARG00000075697	3.55788	1.32507e-05	0.000139156	si:ch73-380l3.1	protein_coding
ENSDARG00000109926	3.55779	2.99623e-09	7.37548e-08	FP236812.2	protein_coding
ENSDARG00000054153	3.556	1.09889e-06	1.53153e-05	ftr50	protein_coding
ENSDARG00000105345	3.55538	6.0921e-05	0.000518751	zgc:173552	protein_coding
ENSDARG00000114133	3.55118	7.41826e-09	1.69838e-07	hist1h2a5	protein_coding
ENSDARG00000093877	3.55114	0.00183818	0.00890295	MFAP4 (1 of many)	protein_coding
ENSDARG00000056407	3.55088	1.2262e-33	9.45442e-31	irf8	protein_coding
ENSDARG00000075121	3.54985	3.04677e-07	4.8758e-06	hbegfa	protein_coding
ENSDARG00000074754	3.54933	2.65323e-06	3.38588e-05	si:dkey-188i13.9	protein_coding
ENSDARG00000087198	3.54398	0.00047481	0.00291375	cthrc1a	protein_coding
ENSDARG00000101017	3.54264	1.1797e-08	2.59165e-07	CT583642.1	protein_coding
ENSDARG00000112021	3.53967	0.00204539	0.00971755	si:dkey-4c23.4	protein_coding
ENSDARG00000044685	3.53899	0.00818874	0.029477	nr0b2a	protein_coding
ENSDARG00000075818	3.53699	1.07761e-10	3.5478e-09	dok2	protein_coding
ENSDARG00000111619	3.53617	4.16719e-10	1.21766e-08	FP236812.4	protein_coding
ENSDARG00000002304	3.53596	7.84143e-17	7.32132e-15	gins2	protein_coding
ENSDARG00000117497	3.53404	0.00507282	0.0200017	CU694380.2	lincRNA
ENSDARG00000057787	3.53065	1.36725e-11	5.18728e-10	itgae.2	protein_coding
ENSDARG00000100952	3.53062	3.48195e-07	5.5007e-06	wu:fj16a03	protein_coding
ENSDARG00000105366	3.52894	1.43085e-07	2.49453e-06	hist1h2a10	protein_coding
ENSDARG00000101030	3.52884	3.66257e-15	2.66087e-13	si:ch73-158p21.3	protein_coding
ENSDARG00000092569	3.52833	0.00244735	0.0111741	BX571681.1	unprocessed_pseudogene
ENSDARG00000086166	3.52804	1.78131e-05	0.000181024	si:ch211-286b5.9	protein_coding
ENSDARG00000101050	3.52639	1.77665e-09	4.58095e-08	tmc8	protein_coding
ENSDARG00000099155	3.5263	2.83418e-07	4.6052e-06	tpst2	protein_coding
ENSDARG00000044039	3.52474	4.12852e-08	8.20311e-07	stx11a	protein_coding
ENSDARG00000068858	3.52282	4.29571e-25	1.2997e-22	il2rga	protein_coding
ENSDARG00000038010	3.52181	5.07218e-19	6.62487e-17	rac2	protein_coding
ENSDARG00000092667	3.51946	6.78403e-11	2.32309e-09	si:ch211-271e10.2	protein_coding
ENSDARG00000098004	3.51703	4.07497e-11	1.4494e-09	ftr91	protein_coding
ENSDARG00000100259	3.51584	1.63383e-05	0.000167317	zgc:171759	protein_coding
ENSDARG00000025254	3.51325	5.66694e-08	1.09411e-06	s100a10b	protein_coding
ENSDARG00000101482	3.51067	3.95096e-14	2.39685e-12	hk2	protein_coding
ENSDARG00000078244	3.50853	2.35989e-10	7.20384e-09	si:ch211-197l9.2	protein_coding
ENSDARG00000077456	3.50485	1.70422e-21	3.15769e-19	si:ch211-113a14.12	protein_coding
ENSDARG00000079315	3.49988	6.48798e-06	7.427e-05	lpxn	protein_coding
ENSDARG00000079614	3.49879	8.53301e-05	0.000694356	ftr34	protein_coding
ENSDARG00000068969	3.49363	4.38566e-12	1.82624e-10	zgc:153759	protein_coding
ENSDARG00000036456	3.49012	1.97415e-15	1.50274e-13	anxa4	protein_coding
ENSDARG00000087012	3.48837	5.83146e-19	7.53425e-17	BX004816.2	protein_coding
ENSDARG00000103819	3.48775	1.93316e-08	4.09268e-07	CU459186.5	protein_coding
ENSDARG00000112175	3.48632	4.9851e-19	6.54692e-17	zgc:173552	protein_coding
ENSDARG00000055955	3.47951	7.0577e-19	8.92557e-17	lcp2a	protein_coding
ENSDARG00000100287	3.4778	2.56569e-07	4.22641e-06	SLA (1 of many)	protein_coding
ENSDARG00000037961	3.47544	2.46978e-08	5.11106e-07	rcn3	protein_coding
ENSDARG00000039133	3.47535	2.62292e-07	4.31177e-06	lamb4	protein_coding
ENSDARG00000079553	3.4746	2.30995e-05	0.000226155	cd83	protein_coding
ENSDARG00000069192	3.47406	0.00502189	0.0198468	zgc:163030	protein_coding
ENSDARG00000055550	3.473	2.09613e-09	5.3243e-08	FO834888.1	protein_coding
ENSDARG00000096304	3.47237	1.51536e-09	3.9557e-08	btr31	protein_coding
ENSDARG00000104088	3.47133	1.22089e-09	3.26053e-08	si:dkey-14o6.2	protein_coding
ENSDARG00000104325	3.46479	7.23884e-22	1.38418e-19	plek	protein_coding
ENSDARG00000044694	3.45746	3.85378e-19	5.1749e-17	fybb	protein_coding
ENSDARG00000105359	3.45728	2.41827e-09	6.06521e-08	FP325123.1	protein_coding
ENSDARG00000067872	3.45467	2.78799e-12	1.19638e-10	CU469531.1	unprocessed_pseudogene
ENSDARG00000075643	3.45409	5.22504e-22	1.01536e-19	ifi35	protein_coding
ENSDARG00000038424	3.45005	3.1966e-55	1.5281e-51	C4B	protein_coding
ENSDARG00000057644	3.44846	1.21121e-13	6.65526e-12	adam8b	protein_coding
ENSDARG00000089636	3.44835	0.0106337	0.036372	BX322587.1	protein_coding
ENSDARG00000074283	3.44525	1.18623e-19	1.72886e-17	inpp5d	protein_coding
ENSDARG00000090340	3.4417	9.67725e-08	1.7711e-06	si:dkey-27o4.1	protein_coding
ENSDARG00000090473	3.43963	8.57111e-10	2.37664e-08	si:ch211-269k10.5	protein_coding
ENSDARG00000100599	3.4396	9.37591e-19	1.15517e-16	c1s	protein_coding
ENSDARG00000043249	3.43858	2.47834e-29	1.20892e-26	irf1b	protein_coding
ENSDARG00000097901	3.43845	0.00692274	0.025735	si:ch73-90p23.1	protein_coding
ENSDARG00000111396	3.43561	2.25115e-18	2.5745e-16	zgc:173552	protein_coding
ENSDARG00000007709	3.43533	1.43783e-12	6.48025e-11	adamts8a	protein_coding
ENSDARG00000016065	3.42815	4.28276e-23	9.56697e-21	tlr3	protein_coding
ENSDARG00000067608	3.42448	0.00126622	0.00655944	zswim7	protein_coding
ENSDARG00000095864	3.42374	1.06474e-13	5.96005e-12	ftr59	protein_coding
ENSDARG00000037852	3.41952	6.69728e-08	1.2735e-06	zgc:101663	protein_coding
ENSDARG00000045530	3.41768	3.75168e-27	1.37958e-24	si:ch211-244b2.4	protein_coding
ENSDARG00000043802	3.41764	3.6043e-05	0.000330837	ms4a17a.9	protein_coding
ENSDARG00000116654	3.41741	1.20206e-21	2.24465e-19	si:dkey-261m9.6	protein_coding
ENSDARG00000099123	3.41596	6.45321e-12	2.59671e-10	hist1h2a4	protein_coding
ENSDARG00000067751	3.41556	2.01095e-13	1.0729e-11	si:rp71-68n21.9	protein_coding
ENSDARG00000110035	3.41364	1.95907e-08	4.14021e-07	CR762436.1	protein_coding
ENSDARG00000016939	3.41307	1.23093e-47	3.26907e-44	itgb2	protein_coding
ENSDARG00000079829	3.41286	0.00210013	0.00992984	BX537113.1	protein_coding
ENSDARG00000056209	3.41061	0.00754104	0.027559	myoz1a	protein_coding
ENSDARG00000055831	3.40692	0.000151504	0.00111801	si:dkey-182g1.6	protein_coding
ENSDARG00000110841	3.40394	7.79429e-15	5.44734e-13	si:dkey-108k21.14	protein_coding
ENSDARG00000089333	3.39916	0.000816894	0.00457944	si:ch211-198c19.1	protein_coding
ENSDARG00000014059	3.39829	1.08141e-12	5.00858e-11	cldn5b	protein_coding
ENSDARG00000096863	3.39733	9.15707e-11	3.06544e-09	si:ch73-380l3.4	protein_coding
ENSDARG00000117401	3.39342	2.90032e-06	3.66985e-05	BX545917.3	lincRNA
ENSDARG00000058413	3.38939	2.13036e-24	5.65777e-22	rnaset2l	protein_coding
ENSDARG00000043081	3.38472	6.22767e-09	1.44799e-07	ctsz	protein_coding
ENSDARG00000111536	3.38296	0.00014308	0.00106672	CR354435.5	protein_coding
ENSDARG00000087554	3.38162	2.03716e-14	1.30193e-12	cdk1	protein_coding
ENSDARG00000102762	3.38143	3.31431e-16	2.87024e-14	pik3r5	protein_coding
ENSDARG00000103409	3.37688	1.82452e-29	9.27865e-27	uhrf1	protein_coding
ENSDARG00000117781	3.37654	3.71296e-13	1.88423e-11	CABZ01073834.1	lincRNA
ENSDARG00000006848	3.37511	1.58793e-05	0.000163106	parp9	protein_coding
ENSDARG00000086703	3.37394	2.88153e-34	2.75498e-31	si:dkey-126g1.7	protein_coding
ENSDARG00000062049	3.37037	1.8837e-19	2.68001e-17	hmha1b	protein_coding
ENSDARG00000021086	3.37017	6.17007e-19	7.92887e-17	znf367	protein_coding
ENSDARG00000105502	3.36714	1.35367e-07	2.37449e-06	si:ch73-368j24.12	protein_coding
ENSDARG00000058820	3.36539	6.7967e-19	8.6412e-17	bin1b	protein_coding
ENSDARG00000110812	3.36257	3.11333e-15	2.28969e-13	FQ312024.1	protein_coding
ENSDARG00000075929	3.36225	0.0146436	0.0469878	si:dkey-219c10.4	protein_coding
ENSDARG00000090140	3.36073	0.00664147	0.0249058	tmem196b	protein_coding
ENSDARG00000112593	3.3591	6.26572e-29	2.67434e-26	hist1h2a2	protein_coding
ENSDARG00000104649	3.35603	5.43033e-09	1.27626e-07	si:dkey-40c23.3	protein_coding
ENSDARG00000058471	3.35512	7.55872e-15	5.30721e-13	plk1	protein_coding
ENSDARG00000063295	3.35215	1.09729e-06	1.53019e-05	myh9a	protein_coding
ENSDARG00000016188	3.35004	2.31843e-20	3.74426e-18	si:ch73-63e15.2	protein_coding
ENSDARG00000098745	3.34745	1.20769e-12	5.55121e-11	tfec	protein_coding
ENSDARG00000099401	3.34582	0.000329678	0.0021483	ccl33.3	processed_transcript
ENSDARG00000071377	3.34309	0.00163472	0.00809806	hsd11b1la	protein_coding
ENSDARG00000110978	3.34213	0.000513146	0.00310119	ftr32	protein_coding
ENSDARG00000030743	3.34054	6.6891e-15	4.73026e-13	sptlc3	protein_coding
ENSDARG00000103750	3.34045	1.19741e-05	0.000127372	si:ch211-246m6.5	protein_coding
ENSDARG00000003200	3.3399	8.21827e-14	4.65481e-12	foxm1	protein_coding
ENSDARG00000012600	3.33834	3.5561e-13	1.80847e-11	HELZ2	protein_coding
ENSDARG00000029944	3.3376	1.08446e-07	1.94893e-06	parpbp	protein_coding
ENSDARG00000051737	3.33693	9.37529e-18	1.00488e-15	zgc:173552	protein_coding
ENSDARG00000115644	3.33453	3.53438e-25	1.08306e-22	zgc:173552	protein_coding
ENSDARG00000051857	3.33286	3.63116e-11	1.30514e-09	tes	protein_coding
ENSDARG00000026990	3.33264	2.04533e-07	3.44278e-06	klhl6	protein_coding
ENSDARG00000008165	3.33162	1.21143e-09	3.24616e-08	caspa	protein_coding
ENSDARG00000021677	3.33136	8.01912e-13	3.83346e-11	phf11	protein_coding
ENSDARG00000100383	3.32932	7.83482e-27	2.75394e-24	il10ra	protein_coding
ENSDARG00000044276	3.32842	0.000479824	0.00293979	spp1	protein_coding
ENSDARG00000040917	3.32821	7.57157e-15	5.30721e-13	cbfb	protein_coding
ENSDARG00000103276	3.32655	1.06446e-30	6.52375e-28	fcer1g	protein_coding
ENSDARG00000024204	3.32325	1.69719e-24	4.66277e-22	mcm3	protein_coding
ENSDARG00000105340	3.31521	2.75358e-19	3.82651e-17	zgc:112234	protein_coding
ENSDARG00000041724	3.31149	1.26954e-08	2.7788e-07	glipr2	protein_coding
ENSDARG00000095654	3.30823	8.26721e-07	1.19181e-05	tns3.1	protein_coding
ENSDARG00000090882	3.30676	4.41714e-25	1.31973e-22	si:rp71-36a1.5	protein_coding
ENSDARG00000013719	3.30491	7.31602e-13	3.51846e-11	gtse1	protein_coding
ENSDARG00000103129	3.30436	2.37293e-11	8.69905e-10	nid1b	protein_coding
ENSDARG00000027658	3.30316	7.41983e-10	2.07425e-08	irf10	protein_coding
ENSDARG00000054929	3.30093	2.85171e-18	3.24579e-16	zgc:110540	protein_coding
ENSDARG00000071491	3.29964	4.12898e-16	3.53731e-14	nrros	protein_coding
ENSDARG00000056832	3.29831	8.51245e-09	1.9141e-07	exo1	protein_coding
ENSDARG00000086130	3.29696	3.02379e-12	1.29293e-10	si:ch211-42i6.2	protein_coding
ENSDARG00000015065	3.29361	7.72983e-18	8.39811e-16	c4	protein_coding
ENSDARG00000053512	3.29353	0.000104528	0.000822667	crybb2	protein_coding
ENSDARG00000101356	3.29181	3.03808e-09	7.4708e-08	CABZ01044156.1	protein_coding
ENSDARG00000089441	3.29159	4.71415e-05	0.000415938	si:ch211-105c13.3	protein_coding
ENSDARG00000088260	3.28792	1.86749e-14	1.20315e-12	gig2p	protein_coding
ENSDARG00000112491	3.28586	6.78723e-06	7.73252e-05	CR354435.6	protein_coding
ENSDARG00000055186	3.28419	4.79125e-09	1.1391e-07	ccr9a	protein_coding
ENSDARG00000094154	3.28312	1.49737e-17	1.56974e-15	hist2h3c	protein_coding
ENSDARG00000075538	3.28302	6.17525e-26	1.99461e-23	zgc:163061	protein_coding
ENSDARG00000105508	3.28237	2.03892e-21	3.74878e-19	si:dkey-23a13.21	protein_coding
ENSDARG00000009160	3.28186	9.437e-07	1.33786e-05	kmo	protein_coding
ENSDARG00000104197	3.28164	1.24234e-15	9.86522e-14	ptpn22	protein_coding
ENSDARG00000093074	3.27967	5.16707e-12	2.12937e-10	si:ch211-139g16.8	protein_coding
ENSDARG00000041339	3.27792	0.00484732	0.0192966	zgc:92380	protein_coding
ENSDARG00000102798	3.27675	6.86883e-31	4.3205e-28	mcm2	protein_coding
ENSDARG00000093608	3.27644	7.97872e-25	2.27033e-22	ccl34b.1	protein_coding
ENSDARG00000000906	3.27524	1.02174e-13	5.73276e-12	skap2	protein_coding
ENSDARG00000004433	3.2725	1.77227e-09	4.57461e-08	btk	protein_coding
ENSDARG00000068941	3.27171	4.58572e-14	2.72656e-12	zgc:113983	protein_coding
ENSDARG00000103618	3.26889	0.000249819	0.0017041	btr18	protein_coding
ENSDARG00000063385	3.26537	5.69449e-17	5.48829e-15	cenpe	protein_coding
ENSDARG00000114334	3.26314	7.91089e-18	8.55593e-16	zgc:173552	protein_coding
ENSDARG00000067797	3.2591	7.01947e-34	5.7855e-31	spi1a	protein_coding
ENSDARG00000086112	3.25733	7.15841e-18	7.84863e-16	si:ch211-266i6.3	protein_coding
ENSDARG00000038822	3.24768	3.21283e-22	6.39943e-20	mrc1b	protein_coding
ENSDARG00000051736	3.24752	4.664e-06	5.56559e-05	hist1h2a4	protein_coding
ENSDARG00000109737	3.24748	2.38078e-07	3.94902e-06	CR354435.2	protein_coding
ENSDARG00000014943	3.24733	1.72298e-10	5.44743e-09	kif23	protein_coding
ENSDARG00000100590	3.2439	2.3547e-07	3.91664e-06	BX649421.1	unprocessed_pseudogene
ENSDARG00000016594	3.24313	5.11191e-08	9.94991e-07	haus4	protein_coding
ENSDARG00000068175	3.24173	1.38673e-08	3.0105e-07	ing5b	protein_coding
ENSDARG00000061941	3.24097	1.11646e-13	6.21786e-12	trpv4	protein_coding
ENSDARG00000018553	3.23892	1.35569e-23	3.20828e-21	ifih1	protein_coding
ENSDARG00000100019	3.23859	1.29818e-12	5.91032e-11	arhgap11a	protein_coding
ENSDARG00000026224	3.23818	2.35702e-15	1.74961e-13	fanci	protein_coding
ENSDARG00000100280	3.2371	1.61793e-08	3.4621e-07	znfx1	protein_coding
ENSDARG00000114500	3.2359	6.74043e-14	3.90096e-12	CU302436.4	protein_coding
ENSDARG00000004301	3.23547	1.5696e-14	1.02504e-12	rhogb	protein_coding
ENSDARG00000045959	3.2354	5.90725e-34	5.04268e-31	csf3r	protein_coding
ENSDARG00000105459	3.23285	6.39454e-23	1.41521e-20	CU457819.7	protein_coding
ENSDARG00000090890	3.23156	4.30845e-12	1.79722e-10	cmklr1	protein_coding
ENSDARG00000102245	3.22707	1.25929e-22	2.64032e-20	tk1	protein_coding
ENSDARG00000117671	3.22617	6.34952e-12	2.56362e-10	BX663525.2	lincRNA
ENSDARG00000027345	3.22432	1.99717e-10	6.19147e-09	mpzl2b	protein_coding
ENSDARG00000005462	3.22164	1.04452e-20	1.77065e-18	kif4	protein_coding
ENSDARG00000092985	3.21936	1.38939e-17	1.46296e-15	CU499330.1	processed_transcript
ENSDARG00000101041	3.21609	0.00667634	0.0250161	ccl39.1	protein_coding
ENSDARG00000091972	3.21486	0.000327369	0.00213675	si:dkey-58f10.7	protein_coding
ENSDARG00000040041	3.21346	3.09014e-21	5.55342e-19	mcm4	protein_coding
ENSDARG00000110152	3.21166	3.28557e-08	6.67219e-07	CR354435.3	protein_coding
ENSDARG00000075508	3.21056	5.27111e-10	1.51613e-08	si:dkey-108k21.10	protein_coding
ENSDARG00000070668	3.20761	8.68759e-05	0.000703877	cd4-1	protein_coding
ENSDARG00000094984	3.20602	1.35928e-17	1.43758e-15	si:ch211-197g15.8	protein_coding
ENSDARG00000016470	3.20438	6.75079e-11	2.31503e-09	anxa5b	protein_coding
ENSDARG00000020289	3.20425	6.99667e-08	1.32097e-06	pif1	protein_coding
ENSDARG00000113800	3.20152	6.51467e-14	3.81651e-12	si:dkey-108k21.19	protein_coding
ENSDARG00000074846	3.19684	9.67866e-21	1.65242e-18	si:dkeyp-68b7.12	protein_coding
ENSDARG00000095695	3.19606	2.62228e-27	9.79341e-25	ms4a17a.10	protein_coding
ENSDARG00000070378	3.19143	0.00550242	0.0213297	ccl35.2	protein_coding
ENSDARG00000105665	3.19085	5.9231e-06	6.86919e-05	FO704741.1	lincRNA
ENSDARG00000103466	3.18945	6.7263e-11	2.30994e-09	ccl35.1	protein_coding
ENSDARG00000032637	3.18929	2.01497e-16	1.7904e-14	si:dkey-261m9.12	protein_coding
ENSDARG00000098570	3.18836	4.97724e-05	0.000435932	si:ch211-8c17.2	protein_coding
ENSDARG00000096381	3.18811	0.0115556	0.0389675	neu3.4	protein_coding
ENSDARG00000078468	3.1879	0.000174934	0.0012637	fap	protein_coding
ENSDARG00000093402	3.18675	5.79944e-08	1.11429e-06	si:dkey-286j17.4	protein_coding
ENSDARG00000061710	3.18187	8.09968e-12	3.18943e-10	map3k8	protein_coding
ENSDARG00000039900	3.1795	1.89493e-30	1.10974e-27	si:ch73-168d20.1	protein_coding
ENSDARG00000010948	3.17821	1.14673e-14	7.67763e-13	kif11	protein_coding
ENSDARG00000077571	3.17729	0.00333209	0.0143141	zgc:174862	protein_coding
ENSDARG00000117607	3.17674	2.84774e-09	7.04625e-08	FP102158.1	lincRNA
ENSDARG00000058068	3.17599	0.00117394	0.00615474	tnfsf10l4	protein_coding
ENSDARG00000042563	3.1728	8.09233e-14	4.60531e-12	mis18bp1	protein_coding
ENSDARG00000044325	3.17258	5.9872e-08	1.14852e-06	zgc:193690	protein_coding
ENSDARG00000023188	3.1721	1.00397e-32	7.2718e-30	lcp1	protein_coding
ENSDARG00000114803	3.17158	6.86433e-06	7.80177e-05	LO018106.2	protein_coding
ENSDARG00000054137	3.16789	0.000104196	0.000820692	adgrg6	protein_coding
ENSDARG00000109658	3.16785	0.0129027	0.0425437	CR792453.2	protein_coding
ENSDARG00000069941	3.15818	1.24791e-05	0.000132331	tdp2a	protein_coding
ENSDARG00000098913	3.15712	0.00131207	0.00676324	faslg	protein_coding
ENSDARG00000114125	3.15549	1.10592e-22	2.33927e-20	si:dkey-261m9.19	protein_coding
ENSDARG00000098622	3.15261	6.09473e-09	1.41985e-07	ccne1	protein_coding
ENSDARG00000076574	3.14858	1.03584e-46	2.47587e-43	si:ch211-171h4.6	protein_coding
ENSDARG00000070239	3.14422	2.2307e-15	1.661e-13	knl1	protein_coding
ENSDARG00000091957	3.14195	0.0141017	0.0455609	si:dkey-172o10.8	protein_coding
ENSDARG00000088274	3.14137	3.11738e-10	9.27916e-09	si:ch211-181d7.1	protein_coding
ENSDARG00000024211	3.14108	0.0141075	0.0455734	ifng1	protein_coding
ENSDARG00000098716	3.13978	1.02775e-14	6.95903e-13	parp11	protein_coding
ENSDARG00000094210	3.13763	1.04134e-11	4.00161e-10	zgc:109934	protein_coding
ENSDARG00000102986	3.13704	3.05371e-30	1.73785e-27	csf1ra	protein_coding
ENSDARG00000019564	3.13464	1.75408e-07	3.00114e-06	asap2b	protein_coding
ENSDARG00000055520	3.13462	0.0134488	0.043931	ftr61	protein_coding
ENSDARG00000116132	3.13329	9.70428e-09	2.15769e-07	RF00017	misc_RNA
ENSDARG00000112840	3.13256	6.18504e-08	1.18268e-06	hist1h2a10	protein_coding
ENSDARG00000036990	3.13115	4.51948e-11	1.59564e-09	dctd	protein_coding
ENSDARG00000002494	3.12798	1.06616e-07	1.91892e-06	itgb6	protein_coding
ENSDARG00000045517	3.12727	1.14616e-09	3.09525e-08	itih5	protein_coding
ENSDARG00000110879	3.12503	0.0142081	0.0458364	BX908804.2	protein_coding
ENSDARG00000078654	3.12448	2.7221e-17	2.71098e-15	tpx2	protein_coding
ENSDARG00000053568	3.11975	4.09111e-10	1.19692e-08	pstpip1b	protein_coding
ENSDARG00000045066	3.11762	8.43332e-34	6.71911e-31	entpd1	protein_coding
ENSDARG00000111648	3.1154	9.84453e-09	2.18278e-07	hist1h2a2	protein_coding
ENSDARG00000031534	3.11312	7.36438e-06	8.30128e-05	CU571315.1	protein_coding
ENSDARG00000014685	3.11232	6.41218e-21	1.12694e-18	esco2	protein_coding
ENSDARG00000023053	3.11016	6.14171e-11	2.11831e-09	fam129ab	protein_coding
ENSDARG00000115799	3.10988	1.16529e-07	2.08167e-06	HIST1H4A	protein_coding
ENSDARG00000030250	3.10798	4.0989e-05	0.000368592	dennd2db	protein_coding
ENSDARG00000107086	3.10414	2.02655e-07	3.41598e-06	CU179656.1	protein_coding
ENSDARG00000068993	3.10174	9.76626e-14	5.5055e-12	zgc:153631	protein_coding
ENSDARG00000080484	3.1009	8.23395e-11	2.7837e-09	dre-mir-21-2	miRNA
ENSDARG00000045167	3.09949	6.26685e-15	4.45804e-13	dlgap5	protein_coding
ENSDARG00000114895	3.09845	4.54131e-19	5.99704e-17	si:ch211-113a14.22	protein_coding
ENSDARG00000057323	3.09801	9.06485e-15	6.24404e-13	e2f8	protein_coding
ENSDARG00000036180	3.09679	1.62654e-07	2.80097e-06	ccnb2	protein_coding
ENSDARG00000051735	3.09503	5.33563e-12	2.18752e-10	si:ch211-113a14.18	protein_coding
ENSDARG00000053554	3.09308	6.93672e-12	2.7726e-10	wdr76	protein_coding
ENSDARG00000088091	3.09299	3.47604e-19	4.69403e-17	pfn1	protein_coding
ENSDARG00000026787	3.09231	2.97824e-07	4.78078e-06	aqp7	protein_coding
ENSDARG00000098216	3.09137	5.12065e-05	0.000446472	si:ch211-215e19.3	protein_coding
ENSDARG00000020235	3.08794	4.09221e-06	4.97264e-05	sept9a	protein_coding
ENSDARG00000000349	3.08243	1.21793e-07	2.16447e-06	cfap300	protein_coding
ENSDARG00000026454	3.08229	2.56797e-07	4.22725e-06	mis12	protein_coding
ENSDARG00000031647	3.08223	5.49918e-08	1.06258e-06	stat2	protein_coding
ENSDARG00000105643	3.08213	9.51353e-10	2.61371e-08	adgrg1	protein_coding
ENSDARG00000088672	3.07733	2.89498e-13	1.49775e-11	zmp:0000000936	protein_coding
ENSDARG00000071113	3.07608	1.34294e-14	8.8917e-13	xirp2a	protein_coding
ENSDARG00000015460	3.07548	1.97285e-13	1.05729e-11	racgap1	protein_coding
ENSDARG00000026350	3.07398	5.87295e-17	5.63756e-15	wasb	protein_coding
ENSDARG00000094627	3.07389	0.000729617	0.0041851	si:dkey-148f10.4	protein_coding
ENSDARG00000009313	3.07151	1.58022e-10	5.04277e-09	zgc:63831	protein_coding
ENSDARG00000024209	3.07032	3.50834e-14	2.16125e-12	wasf2	protein_coding
ENSDARG00000091234	3.07021	1.92955e-18	2.23884e-16	si:ch73-335l21.4	protein_coding
ENSDARG00000097752	3.06935	0.0120549	0.0403327	si:rp71-77l1.2	protein_coding
ENSDARG00000098490	3.06855	4.09665e-07	6.36151e-06	CABZ01118270.1	protein_coding
ENSDARG00000034718	3.06567	1.30727e-07	2.306e-06	tfpia	protein_coding
ENSDARG00000054610	3.06546	4.67579e-26	1.53097e-23	coro1a	protein_coding
ENSDARG00000097815	3.06536	0.00567075	0.0218722	CU928129.1	lincRNA
ENSDARG00000044775	3.06301	3.72622e-16	3.20375e-14	fut7	protein_coding
ENSDARG00000044795	3.06149	7.0705e-07	1.04385e-05	entpd2b	protein_coding
ENSDARG00000056985	3.0595	3.12393e-09	7.67401e-08	tpte	protein_coding
ENSDARG00000061385	3.05768	1.60327e-10	5.10271e-09	haus3	protein_coding
ENSDARG00000056473	3.05739	8.30056e-16	6.79452e-14	chaf1b	protein_coding
ENSDARG00000105473	3.05698	5.82049e-13	2.84502e-11	si:cabz01036006.1	protein_coding
ENSDARG00000058774	3.0538	1.18223e-09	3.17502e-08	CABZ01053221.1	protein_coding
ENSDARG00000006603	3.05113	8.08516e-15	5.63415e-13	csrp1a	protein_coding
ENSDARG00000024488	3.05076	8.17233e-07	1.18099e-05	top2a	protein_coding
ENSDARG00000043403	3.04701	4.38659e-14	2.6212e-12	paox1	protein_coding
ENSDARG00000114370	3.04675	2.91715e-18	3.30454e-16	FQ312024.2	protein_coding
ENSDARG00000097679	3.04583	1.17357e-07	2.09489e-06	ftr88	protein_coding
ENSDARG00000005993	3.04307	1.4624e-10	4.70447e-09	prc1b	protein_coding
ENSDARG00000077618	3.04259	1.44556e-09	3.80109e-08	rin3	protein_coding
ENSDARG00000116052	3.04141	8.0916e-17	7.5255e-15	il4r.1	protein_coding
ENSDARG00000116781	3.04039	2.65955e-06	3.39213e-05	CR354435.13	protein_coding
ENSDARG00000089039	3.03881	6.36542e-12	2.5657e-10	zgc:173585	protein_coding
ENSDARG00000079105	3.03678	6.08032e-16	5.11732e-14	mhc2dab	protein_coding
ENSDARG00000074390	3.03137	0.00039425	0.0024956	tmem176l.4	protein_coding
ENSDARG00000077120	3.02845	7.35894e-18	8.03166e-16	arid5a	protein_coding
ENSDARG00000054438	3.02839	1.17429e-15	9.38725e-14	fzd2	protein_coding
ENSDARG00000069114	3.02701	2.63223e-17	2.64351e-15	unc93b1	protein_coding
ENSDARG00000069461	3.02496	1.03162e-11	3.97064e-10	rnaseka	protein_coding
ENSDARG00000009123	3.01894	2.35848e-07	3.92019e-06	sele	protein_coding
ENSDARG00000027907	3.01886	6.17721e-05	0.00052525	si:ch211-216p19.6	protein_coding
ENSDARG00000036479	3.01816	0.000787649	0.00444543	si:dkeyp-80c12.4	protein_coding
ENSDARG00000087084	3.01788	1.54865e-06	2.0854e-05	hcar1-4	protein_coding
ENSDARG00000016999	3.01639	0.00206932	0.00980977	lin28a	protein_coding
ENSDARG00000045815	3.0109	2.73388e-10	8.18861e-09	mcm10	protein_coding
ENSDARG00000088283	3.00923	9.8658e-14	5.54852e-12	si:ch73-248e21.5	protein_coding
ENSDARG00000089043	3.00625	1.73099e-20	2.85339e-18	ptpn6	protein_coding
ENSDARG00000092602	2.99999	3.93103e-08	7.84957e-07	BX546499.1	protein_coding
ENSDARG00000091381	2.99992	9.75217e-08	1.78208e-06	si:ch211-214c20.1	protein_coding
ENSDARG00000078119	2.99919	7.81083e-16	6.43774e-14	sh3bp1	protein_coding
ENSDARG00000053005	2.99775	2.10393e-08	4.41512e-07	cd22	protein_coding
ENSDARG00000096562	2.99652	1.82372e-07	3.11362e-06	wu:fj29h11	protein_coding
ENSDARG00000086591	2.99543	1.34734e-13	7.36936e-12	si:ch211-113a14.11	protein_coding
ENSDARG00000004937	2.99447	1.17916e-08	2.59165e-07	skp2	protein_coding
ENSDARG00000098477	2.9936	3.30148e-14	2.04435e-12	tec	protein_coding
ENSDARG00000040178	2.99043	1.38465e-15	1.08511e-13	havcr1	protein_coding
ENSDARG00000092290	2.98882	5.92619e-10	1.68829e-08	si:dkeyp-26a9.2	protein_coding
ENSDARG00000093592	2.98609	6.55865e-09	1.51757e-07	CR391910.2	lincRNA
ENSDARG00000062152	2.98539	9.87514e-19	1.20426e-16	chaf1a	protein_coding
ENSDARG00000075748	2.98499	5.18627e-20	7.9463e-18	NCKAP1L	protein_coding
ENSDARG00000078433	2.98475	1.16335e-09	3.13135e-08	spc25	protein_coding
ENSDARG00000015149	2.98441	4.67615e-11	1.64609e-09	wasa	protein_coding
ENSDARG00000092028	2.98368	3.51107e-06	4.35274e-05	si:dkey-4c23.3	protein_coding
ENSDARG00000070109	2.98168	1.25237e-19	1.81419e-17	ncapg	protein_coding
ENSDARG00000026417	2.98117	0.0114129	0.038568	ccr12b.2	protein_coding
ENSDARG00000094606	2.9797	3.24016e-20	5.09515e-18	si:zfos-364h11.2	protein_coding
ENSDARG00000006052	2.97948	3.32013e-09	8.10601e-08	malt2	protein_coding
ENSDARG00000078221	2.97591	3.23908e-11	1.17482e-09	si:ch211-204d2.4	protein_coding
ENSDARG00000094098	2.97491	1.50253e-05	0.000155402	si:ch211-278p9.3	protein_coding
ENSDARG00000094832	2.97364	0.00745611	0.0273044	F13A1 (1 of many)	protein_coding
ENSDARG00000031745	2.9724	2.1689e-16	1.92004e-14	si:busm1-266f07.2	protein_coding
ENSDARG00000010318	2.97176	0.00994314	0.0344636	srpx	protein_coding
ENSDARG00000096655	2.96754	1.56672e-10	5.0131e-09	BX901920.1	antisense
ENSDARG00000103340	2.96679	3.10847e-13	1.59439e-11	clic1	protein_coding
ENSDARG00000020031	2.96558	0.00224296	0.0104485	cldn11a	protein_coding
ENSDARG00000086762	2.96522	1.5565e-08	3.34436e-07	gsdmea	protein_coding
ENSDARG00000060917	2.9621	3.90127e-13	1.96312e-11	anln	protein_coding
ENSDARG00000062349	2.9621	1.19004e-11	4.54383e-10	arhgap15	protein_coding
ENSDARG00000067916	2.96154	9.96578e-23	2.1268e-20	lyn	protein_coding
ENSDARG00000019156	2.95774	4.92315e-08	9.60597e-07	haus5	protein_coding
ENSDARG00000115760	2.9541	0.0133147	0.0436022	si:dkey-30g5.1	protein_coding
ENSDARG00000096419	2.95114	5.06437e-13	2.49585e-11	CU659670.1	lincRNA
ENSDARG00000023002	2.95032	9.25762e-11	3.09476e-09	dtl	protein_coding
ENSDARG00000100649	2.94972	1.52966e-10	4.90766e-09	tlr1	protein_coding
ENSDARG00000017320	2.94953	6.3532e-06	7.28667e-05	f11r.1	protein_coding
ENSDARG00000091150	2.94635	5.90515e-20	8.99013e-18	mki67	protein_coding
ENSDARG00000112545	2.9452	9.69207e-07	1.37158e-05	ftr50	protein_coding
ENSDARG00000021794	2.94371	3.99601e-14	2.41193e-12	hmmr	protein_coding
ENSDARG00000111501	2.94349	5.43439e-08	1.05091e-06	FP236812.3	protein_coding
ENSDARG00000094892	2.94328	8.28457e-06	9.26183e-05	cenph	protein_coding
ENSDARG00000012729	2.94189	8.36762e-19	1.04168e-16	hcls1	protein_coding
ENSDARG00000063612	2.93666	3.15446e-13	1.61452e-11	antxr1c	protein_coding
ENSDARG00000038066	2.9358	2.192e-12	9.59582e-11	kpna2	protein_coding
ENSDARG00000117384	2.9342	3.51208e-15	2.55932e-13	CABZ01084575.1	lincRNA
ENSDARG00000000690	2.93318	4.77352e-11	1.67471e-09	sypl2b	protein_coding
ENSDARG00000007108	2.93289	0.00241356	0.01106	lipia	protein_coding
ENSDARG00000003216	2.92922	7.47772e-08	1.40734e-06	anxa2a	protein_coding
ENSDARG00000015623	2.9281	1.62306e-14	1.05134e-12	ada2b	protein_coding
ENSDARG00000099980	2.92348	7.16242e-08	1.34906e-06	bpifcl	protein_coding
ENSDARG00000054942	2.92258	7.35572e-27	2.62413e-24	lgals2a	protein_coding
ENSDARG00000027699	2.92	0.00313765	0.0136208	FUT9 (1 of many)	protein_coding
ENSDARG00000077620	2.91811	3.74944e-13	1.89871e-11	cdca7a	protein_coding
ENSDARG00000078941	2.91772	1.12492e-16	1.03414e-14	ano9a	protein_coding
ENSDARG00000037307	2.9177	1.46914e-12	6.60062e-11	gnpda1	protein_coding
ENSDARG00000007783	2.91519	1.90424e-05	0.000192372	blk	protein_coding
ENSDARG00000105418	2.9119	3.96437e-10	1.16552e-08	CU457819.6	protein_coding
ENSDARG00000105444	2.91176	3.03835e-14	1.89373e-12	hist1h2a11	protein_coding
ENSDARG00000054543	2.90518	4.20403e-23	9.47969e-21	samsn1a	protein_coding
ENSDARG00000114451	2.90461	0.00383419	0.0160162	mmp13a	protein_coding
ENSDARG00000042725	2.90418	5.91034e-15	4.22961e-13	cebpb	protein_coding
ENSDARG00000074136	2.90237	0.000879047	0.00486912	slc47a2.2	protein_coding
ENSDARG00000092310	2.90227	3.61752e-14	2.21141e-12	si:ch211-199g17.2	protein_coding
ENSDARG00000010384	2.89877	9.77895e-07	1.38306e-05	lpar5a	protein_coding
ENSDARG00000033042	2.89774	1.8226e-13	9.78962e-12	ptprja	protein_coding
ENSDARG00000105372	2.88753	0.00780046	0.0283009	si:ch211-220f21.1	protein_coding
ENSDARG00000015998	2.88713	6.38575e-17	6.0329e-15	wdhd1	protein_coding
ENSDARG00000032264	2.88568	2.22168e-16	1.9595e-14	mybl2b	protein_coding
ENSDARG00000101334	2.88512	8.62625e-13	4.0991e-11	ctsc	protein_coding
ENSDARG00000009387	2.88481	1.23464e-10	4.02049e-09	robo4	protein_coding
ENSDARG00000043004	2.88406	5.12539e-08	9.96803e-07	si:dkeyp-117h8.4	protein_coding
ENSDARG00000006456	2.88346	1.89583e-07	3.22291e-06	pdgfrl	protein_coding
ENSDARG00000031848	2.88137	3.56016e-14	2.18753e-12	pparg	protein_coding
ENSDARG00000099981	2.88102	0.000609122	0.0036011	si:ch1073-228h2.2	protein_coding
ENSDARG00000101890	2.88005	0.00114189	0.00602107	pigr	protein_coding
ENSDARG00000007787	2.87846	0.00653893	0.0246015	zgc:112965	protein_coding
ENSDARG00000016044	2.8751	1.46004e-09	3.83072e-08	gins4	protein_coding
ENSDARG00000112944	2.87499	5.26183e-10	1.51528e-08	LO018564.1	protein_coding
ENSDARG00000058389	2.87458	0.000109303	0.000855735	ccl19a.1	protein_coding
ENSDARG00000035514	2.87355	0.00149289	0.007518	adam28	protein_coding
ENSDARG00000096978	2.87204	0.00247352	0.0112742	CU972512.1	lincRNA
ENSDARG00000075963	2.87183	3.62925e-05	0.000332489	mhc1uba	protein_coding
ENSDARG00000071437	2.87098	7.08126e-18	7.79983e-16	ptprc	protein_coding
ENSDARG00000032469	2.86792	5.12931e-11	1.78979e-09	ampd3b	protein_coding
ENSDARG00000044491	2.86478	3.79867e-14	2.31622e-12	kif20a	protein_coding
ENSDARG00000098369	2.8627	0.000196932	0.0013951	si:dkey-165o8.1	protein_coding
ENSDARG00000086897	2.86026	1.56779e-12	7.01747e-11	si:dkey-7i4.1	protein_coding
ENSDARG00000100968	2.85597	6.37347e-15	4.52044e-13	si:ch211-1a19.3	protein_coding
ENSDARG00000076228	2.85431	2.61756e-13	1.36307e-11	kif2c	protein_coding
ENSDARG00000036809	2.85287	5.71621e-05	0.000491118	si:ch211-106j24.1	protein_coding
ENSDARG00000073718	2.85087	0.00172149	0.00845604	si:ch73-233k15.2	protein_coding
ENSDARG00000013926	2.85019	0.000149441	0.00110586	slc16a9a	protein_coding
ENSDARG00000117558	2.85016	0.014529	0.0466888	BX005389.3	lincRNA
ENSDARG00000054837	2.84748	0.000199708	0.00141058	zgc:136870	protein_coding
ENSDARG00000096514	2.84744	0.000465719	0.00286807	si:ch211-286b5.2	protein_coding
ENSDARG00000105430	2.84622	1.10381e-14	7.43192e-13	si:ch73-368j24.11	protein_coding
ENSDARG00000017744	2.84599	6.21824e-18	6.91295e-16	smc2	protein_coding
ENSDARG00000056378	2.8436	5.57442e-13	2.73032e-11	ifi30	protein_coding
ENSDARG00000076019	2.84241	0.0032787	0.0141203	ftr70	protein_coding
ENSDARG00000025601	2.83858	0.000475652	0.00291813	trim35-14	protein_coding
ENSDARG00000103400	2.83836	0.00282836	0.0125192	si:ch211-161m3.1	protein_coding
ENSDARG00000013711	2.83598	4.539e-09	1.08383e-07	zgc:77486	protein_coding
ENSDARG00000079009	2.82795	1.82478e-10	5.71638e-09	abca1b	protein_coding
ENSDARG00000105521	2.82675	1.52193e-05	0.000157273	si:ch73-40a2.1	protein_coding
ENSDARG00000094881	2.82436	0.00841116	0.030137	si:ch211-197h24.8	protein_coding
ENSDARG00000053500	2.82421	2.76386e-07	4.51118e-06	cbsa	protein_coding
ENSDARG00000038882	2.82417	2.75293e-17	2.73031e-15	smc4	protein_coding
ENSDARG00000008388	2.82411	3.04093e-12	1.29793e-10	mmp14b	protein_coding
ENSDARG00000074052	2.82368	0.00139436	0.00711466	si:ch211-281g13.5	protein_coding
ENSDARG00000010317	2.82293	1.21935e-09	3.26005e-08	gpr183a	protein_coding
ENSDARG00000092903	2.82252	2.35001e-06	3.05271e-05	zgc:153317	protein_coding
ENSDARG00000114180	2.82052	1.30274e-07	2.29971e-06	FP236812.5	protein_coding
ENSDARG00000077029	2.81893	7.30639e-14	4.20813e-12	bub1	protein_coding
ENSDARG00000004713	2.81506	1.34917e-08	2.93429e-07	mad2l1	protein_coding
ENSDARG00000075984	2.81485	0.000133835	0.00100912	hsbp1l1	protein_coding
ENSDARG00000098650	2.81126	6.3395e-13	3.07562e-11	iqgap3	protein_coding
ENSDARG00000098406	2.81052	3.81862e-07	5.98117e-06	si:dkey-22a18.2	protein_coding
ENSDARG00000086133	2.81048	0.00100881	0.00544425	si:ch73-267c23.10	protein_coding
ENSDARG00000091905	2.80964	2.43886e-13	1.27279e-11	si:dkey-108k21.21	protein_coding
ENSDARG00000027310	2.80846	2.52214e-09	6.28616e-08	lsp1	protein_coding
ENSDARG00000096554	2.8078	5.92828e-14	3.49009e-12	si:dkey-25o16.4	protein_coding
ENSDARG00000089383	2.80651	2.45413e-12	1.06846e-10	il1fma	protein_coding
ENSDARG00000012066	2.80014	3.24214e-07	5.16279e-06	dcn	protein_coding
ENSDARG00000058346	2.79917	5.95939e-08	1.14411e-06	sass6	protein_coding
ENSDARG00000014929	2.79709	0.00334255	0.0143487	p2ry11	protein_coding
ENSDARG00000054847	2.797	0.000912841	0.00501465	xcr1a.1	protein_coding
ENSDARG00000053293	2.79463	5.93608e-10	1.68862e-08	ftr14	protein_coding
ENSDARG00000075954	2.79427	1.60635e-08	3.4404e-07	serpinh1a	protein_coding
ENSDARG00000019507	2.7941	2.10109e-17	2.14616e-15	mcm5	protein_coding
ENSDARG00000071667	2.79374	1.56773e-06	2.10634e-05	si:dkey-222f2.7	protein_coding
ENSDARG00000096730	2.79367	0.00111843	0.0059222	BX569783.1	antisense
ENSDARG00000105431	2.79029	1.59128e-18	1.88291e-16	si:dkey-23a13.9	protein_coding
ENSDARG00000113399	2.78989	7.38442e-07	1.0835e-05	hist1h2a4	protein_coding
ENSDARG00000045554	2.78981	1.16344e-05	0.000124367	snx20	protein_coding
ENSDARG00000010252	2.78861	9.01703e-19	1.11671e-16	jak3	protein_coding
ENSDARG00000011434	2.78728	0.00756331	0.0276082	ptger2a	protein_coding
ENSDARG00000051923	2.78417	3.90069e-10	1.14821e-08	ccnb1	protein_coding
ENSDARG00000105223	2.78227	7.22188e-06	8.16493e-05	pmp22a	protein_coding
ENSDARG00000108038	2.78028	1.64921e-09	4.27542e-08	CABZ01109481.1	protein_coding
ENSDARG00000089908	2.7802	2.72487e-08	5.60499e-07	si:ch211-265o23.1	protein_coding
ENSDARG00000067524	2.77512	0.00142866	0.00725009	fut9b	protein_coding
ENSDARG00000102318	2.77419	0.00311374	0.0135445	il6	protein_coding
ENSDARG00000042577	2.76852	0.00660189	0.0247955	batf3	protein_coding
ENSDARG00000070584	2.76794	7.11594e-09	1.63543e-07	clic5b	protein_coding
ENSDARG00000113107	2.7674	1.67751e-13	9.07145e-12	CABZ01085275.1	protein_coding
ENSDARG00000068784	2.7668	2.86198e-17	2.82674e-15	vsir	protein_coding
ENSDARG00000060263	2.76448	3.47964e-06	4.31829e-05	pecam1	protein_coding
ENSDARG00000113572	2.76298	0.00106315	0.00567344	si:dkey-102c8.3	protein_coding
ENSDARG00000058042	2.76273	2.46546e-05	0.000239551	kitlgb	protein_coding
ENSDARG00000099194	2.76106	6.03841e-16	5.1e-14	CABZ01058261.1	protein_coding
ENSDARG00000105397	2.76101	2.8354e-05	0.000270222	si:ch211-113a14.22	protein_coding
ENSDARG00000095282	2.7606	1.05836e-05	0.000115143	BX950187.1	lincRNA
ENSDARG00000117303	2.75869	0.00840349	0.030114	BX545917.1	lincRNA
ENSDARG00000097019	2.75618	1.11589e-19	1.64643e-17	dhrs13b	protein_coding
ENSDARG00000076913	2.75218	2.26288e-05	0.00022228	eme1	protein_coding
ENSDARG00000105414	2.7509	3.32168e-05	0.00030929	zgc:112234	protein_coding
ENSDARG00000035858	2.74983	6.68513e-10	1.88429e-08	cnn2	protein_coding
ENSDARG00000091996	2.74882	0.00932363	0.0327677	si:ch211-117m20.5	protein_coding
ENSDARG00000098708	2.74655	0.006097	0.0232425	dre-mir-365-2	miRNA
ENSDARG00000074818	2.74584	0.000214644	0.00149719	si:cabz01036022.1	protein_coding
ENSDARG00000062187	2.74252	8.71265e-10	2.40992e-08	kif14	protein_coding
ENSDARG00000011094	2.7422	2.23583e-21	4.07945e-19	ccna2	protein_coding
ENSDARG00000095298	2.74108	8.72503e-06	9.69529e-05	ftr73	protein_coding
ENSDARG00000036628	2.73993	5.0716e-27	1.83669e-24	cd74b	protein_coding
ENSDARG00000055753	2.7374	2.42316e-09	6.0711e-08	suv39h1b	protein_coding
ENSDARG00000033144	2.73646	2.99756e-24	7.63953e-22	psme2	protein_coding
ENSDARG00000060394	2.73307	2.82483e-07	4.59314e-06	mtfr2	protein_coding
ENSDARG00000062467	2.7322	7.83268e-11	2.65933e-09	stra6l	protein_coding
ENSDARG00000058299	2.73075	0.00210195	0.00993294	zgc:173737	protein_coding
ENSDARG00000105408	2.72642	9.21462e-06	0.000101684	BX248082.1	antisense
ENSDARG00000100738	2.72517	0.00681621	0.0254246	osmr	protein_coding
ENSDARG00000003061	2.72459	3.99825e-10	1.17403e-08	cd276	protein_coding
ENSDARG00000092499	2.72217	3.81158e-12	1.60678e-10	si:ch211-183d21.1	protein_coding
ENSDARG00000037892	2.72025	1.84005e-06	2.45019e-05	psmc3ip	protein_coding
ENSDARG00000020084	2.71726	7.25439e-07	1.06704e-05	tg	protein_coding
ENSDARG00000055252	2.71354	0.00159259	0.00792712	snap23.2	protein_coding
ENSDARG00000111247	2.71278	4.30156e-05	0.000384359	CR762436.3	protein_coding
ENSDARG00000092961	2.71135	0.00465445	0.0186788	ftr26	protein_coding
ENSDARG00000111494	2.71123	1.65351e-07	2.84333e-06	CR354435.4	protein_coding
ENSDARG00000103907	2.71042	9.62556e-12	3.72282e-10	sgo1	protein_coding
ENSDARG00000001558	2.70725	2.66865e-12	1.14723e-10	kifc1	protein_coding
ENSDARG00000100691	2.7071	3.60801e-10	1.06467e-08	prss35	protein_coding
ENSDARG00000093156	2.70695	0.000925813	0.00506959	si:ch73-21g5.7	protein_coding
ENSDARG00000044010	2.7062	0.00120413	0.00628383	loxl2a	protein_coding
ENSDARG00000091734	2.70606	7.49305e-10	2.09228e-08	traf3ip2l	protein_coding
ENSDARG00000023587	2.70525	1.50294e-09	3.93033e-08	kcnk5a	protein_coding
ENSDARG00000074691	2.70399	1.7514e-10	5.51542e-09	mms22l	protein_coding
ENSDARG00000038095	2.70207	1.17714e-09	3.1649e-08	socs1a	protein_coding
ENSDARG00000006677	2.70064	2.17665e-15	1.62582e-13	ripk1l	protein_coding
ENSDARG00000098966	2.7004	4.04123e-06	4.92782e-05	CABZ01064972.1	protein_coding
ENSDARG00000039682	2.69945	0.00136683	0.00699271	si:ch211-121a2.2	protein_coding
ENSDARG00000086815	2.69874	2.83178e-22	5.68783e-20	MYADM	protein_coding
ENSDARG00000020929	2.69221	9.9565e-15	6.7608e-13	fam49ba	protein_coding
ENSDARG00000002479	2.69198	2.03637e-14	1.30193e-12	ercc6l	protein_coding
ENSDARG00000117321	2.69041	1.11287e-06	1.5492e-05	CZQB01066256.1	lincRNA
ENSDARG00000008816	2.69019	3.51064e-12	1.49043e-10	glud1a	protein_coding
ENSDARG00000057683	2.68965	1.00563e-17	1.07306e-15	mcm6	protein_coding
ENSDARG00000101037	2.68882	2.72307e-10	8.17675e-09	asf1ba	protein_coding
ENSDARG00000090977	2.68621	5.954e-09	1.38977e-07	ifit12	protein_coding
ENSDARG00000102806	2.68386	7.92001e-07	1.15218e-05	zgc:112234	protein_coding
ENSDARG00000058638	2.68166	5.1731e-10	1.49333e-08	si:ch211-71m22.1	protein_coding
ENSDARG00000115299	2.67906	1.09345e-07	1.9636e-06	si:ch211-227e10.3	protein_coding
ENSDARG00000051731	2.67777	0.0143641	0.0462518	faap24	protein_coding
ENSDARG00000006174	2.67643	7.47337e-06	8.40605e-05	lrrc23	protein_coding
ENSDARG00000042370	2.67483	4.03811e-05	0.000364222	ptafr	protein_coding
ENSDARG00000112526	2.67468	4.25831e-06	5.1457e-05	CABZ01114581.1	protein_coding
ENSDARG00000115082	2.67322	6.12679e-12	2.48629e-10	CABZ01057928.1	protein_coding
ENSDARG00000076609	2.67166	0.00941161	0.0330138	si:ch211-199g17.9	protein_coding
ENSDARG00000104856	2.67104	9.69774e-09	2.15769e-07	si:ch211-260e23.7	protein_coding
ENSDARG00000002634	2.67047	3.15473e-06	3.95616e-05	b4galt1	protein_coding
ENSDARG00000058358	2.66978	1.67335e-07	2.87536e-06	krt8	protein_coding
ENSDARG00000095113	2.66827	0.000828482	0.00463756	si:ch211-247l8.8	protein_coding
ENSDARG00000103555	2.66638	3.12209e-06	3.91934e-05	si:ch211-8c17.4	protein_coding
ENSDARG00000076766	2.66305	1.33965e-14	8.8917e-13	zgc:163061	protein_coding
ENSDARG00000018616	2.66296	7.7423e-08	1.45256e-06	agtr1a	protein_coding
ENSDARG00000018283	2.66269	6.54303e-13	3.16582e-11	cyba	protein_coding
ENSDARG00000043720	2.66211	2.23204e-07	3.7334e-06	cdc45	protein_coding
ENSDARG00000075730	2.66124	0.000246172	0.00168259	dnph1	protein_coding
ENSDARG00000075641	2.66111	2.04363e-05	0.000204295	steap3	protein_coding
ENSDARG00000078613	2.65938	7.79803e-08	1.46072e-06	vhll	protein_coding
ENSDARG00000090903	2.65703	0.00149111	0.00751117	creb3l3b	protein_coding
ENSDARG00000059774	2.65633	3.07644e-06	3.86812e-05	dub	protein_coding
ENSDARG00000115938	2.6563	8.37386e-21	1.43994e-18	zgc:171759	protein_coding
ENSDARG00000098426	2.65488	0.000125732	0.000961374	si:dkey-56m15.8	protein_coding
ENSDARG00000077103	2.65382	1.26639e-07	2.24216e-06	sema4aa	protein_coding
ENSDARG00000088078	2.65185	1.37443e-07	2.40849e-06	usp18	protein_coding
ENSDARG00000088711	2.65011	0.00277083	0.012333	lgals1l1	protein_coding
ENSDARG00000061717	2.64996	2.65001e-06	3.38538e-05	cytip	protein_coding
ENSDARG00000056874	2.64624	1.13705e-16	1.04129e-14	lygl1	protein_coding
ENSDARG00000111246	2.64516	0.0021029	0.00993502	BX324132.3	protein_coding
ENSDARG00000113458	2.64442	2.83874e-10	8.48144e-09	CABZ01058333.1	protein_coding
ENSDARG00000070434	2.64196	7.56126e-05	0.000624928	rhov	protein_coding
ENSDARG00000071084	2.64006	6.18341e-13	3.0101e-11	wipf1b	protein_coding
ENSDARG00000103399	2.6396	1.43287e-15	1.11197e-13	zgc:63569	protein_coding
ENSDARG00000103015	2.63949	8.22522e-05	0.000670987	hist1h2a4	protein_coding
ENSDARG00000077666	2.63768	0.0035563	0.0150741	evi5a	protein_coding
ENSDARG00000011376	2.63538	1.59185e-10	5.07311e-09	dnase1l4.2	protein_coding
ENSDARG00000089227	2.6338	4.50931e-11	1.5944e-09	si:ch211-91p5.3	protein_coding
ENSDARG00000070485	2.63345	4.85714e-05	0.000426567	cenps	protein_coding
ENSDARG00000113660	2.63334	5.37717e-06	6.32194e-05	si:ch211-196f19.1	protein_coding
ENSDARG00000098293	2.63167	1.99672e-16	1.78267e-14	si:dkey-27i16.2	protein_coding
ENSDARG00000103351	2.63139	0.000192796	0.00136986	FP102192.2	lincRNA
ENSDARG00000088900	2.63027	2.13937e-05	0.000212562	si:dkey-21o19.2	protein_coding
ENSDARG00000016457	2.62863	1.54247e-27	5.94648e-25	irf9	protein_coding
ENSDARG00000100660	2.62405	9.48266e-13	4.47051e-11	si:ch73-252i11.1	protein_coding
ENSDARG00000086752	2.61878	0.000100821	0.000799808	LO018205.1	protein_coding
ENSDARG00000091058	2.61841	3.48106e-08	7.00963e-07	tmem173	protein_coding
ENSDARG00000005098	2.61646	2.39316e-08	4.9697e-07	zgc:86764	protein_coding
ENSDARG00000098296	2.6142	1.52342e-09	3.97085e-08	gnsb	protein_coding
ENSDARG00000074501	2.60879	8.64966e-09	1.93944e-07	tnip2	protein_coding
ENSDARG00000112723	2.60583	0.00222324	0.0103799	LO018508.1	protein_coding
ENSDARG00000071662	2.60579	1.12744e-13	6.25247e-12	si:rp71-36a1.3	protein_coding
ENSDARG00000035506	2.60513	5.12214e-10	1.4804e-08	entpd2a.1	protein_coding
ENSDARG00000011571	2.60492	3.30925e-05	0.000308253	calcrlb	protein_coding
ENSDARG00000114534	2.60469	7.47007e-16	6.19964e-14	FQ312024.3	protein_coding
ENSDARG00000103868	2.60465	4.65764e-16	3.97596e-14	e2f1	protein_coding
ENSDARG00000034207	2.60447	0.00245874	0.0112111	si:dkey-91f15.8	protein_coding
ENSDARG00000026611	2.60444	3.1273e-10	9.28554e-09	socs3b	protein_coding
ENSDARG00000055713	2.59874	8.42025e-16	6.86897e-14	fmnl1a	protein_coding
ENSDARG00000089307	2.59865	0.0007638	0.00433643	pmaip1	protein_coding
ENSDARG00000046148	2.59653	8.84511e-05	0.000714001	tnfaip8l2b	protein_coding
ENSDARG00000099949	2.59609	3.29297e-08	6.68154e-07	FP236551.1	protein_coding
ENSDARG00000099645	2.59561	9.98617e-09	2.21009e-07	zgc:153184	protein_coding
ENSDARG00000075421	2.58875	1.82116e-05	0.000184838	pttg1	protein_coding
ENSDARG00000089706	2.5867	2.91747e-05	0.000276939	ANPEP (1 of many)	protein_coding
ENSDARG00000044318	2.58482	7.72586e-14	4.41779e-12	itgb7	protein_coding
ENSDARG00000018048	2.58296	3.10291e-07	4.9576e-06	zgc:171704	protein_coding
ENSDARG00000086616	2.5797	2.94158e-07	4.73784e-06	cabz01093075.1	protein_coding
ENSDARG00000068814	2.57614	4.67322e-08	9.17824e-07	spata2l	protein_coding
ENSDARG00000086310	2.57552	0.000615083	0.00362558	cabcoco1	protein_coding
ENSDARG00000098754	2.57539	1.97582e-07	3.33989e-06	si:ch211-156p11.1	protein_coding
ENSDARG00000102758	2.57513	1.29736e-05	0.000136605	FO704661.1	protein_coding
ENSDARG00000076483	2.57224	7.51812e-10	2.09683e-08	zgc:198241	protein_coding
ENSDARG00000060012	2.56988	9.05048e-11	3.03827e-09	f2r	protein_coding
ENSDARG00000017653	2.56857	9.95162e-13	4.67316e-11	rgs13	protein_coding
ENSDARG00000077822	2.56742	3.83148e-06	4.70124e-05	si:dkey-6i22.5	protein_coding
ENSDARG00000030753	2.56457	5.31669e-13	2.61481e-11	prrg4	protein_coding
ENSDARG00000039217	2.56255	2.21306e-09	5.59753e-08	orc1	protein_coding
ENSDARG00000007221	2.56035	8.56085e-05	0.000695554	pbk	protein_coding
ENSDARG00000053558	2.55345	6.30372e-18	6.97553e-16	rtkn2a	protein_coding
ENSDARG00000088805	2.55024	3.39875e-13	1.73583e-11	nes	protein_coding
ENSDARG00000071355	2.54946	0.00379135	0.0158595	si:ch211-197g15.7	protein_coding
ENSDARG00000116593	2.54742	3.14606e-08	6.40521e-07	BX323022.1	protein_coding
ENSDARG00000059567	2.5472	4.09871e-07	6.36151e-06	si:ch73-281f12.4	protein_coding
ENSDARG00000037859	2.54694	0.0117643	0.0394986	il11a	protein_coding
ENSDARG00000102483	2.54692	1.04484e-14	7.05472e-13	wu:fb44b02	protein_coding
ENSDARG00000042984	2.54633	3.28366e-05	0.000306227	fpr1	protein_coding
ENSDARG00000033273	2.54533	3.60772e-09	8.79018e-08	primpol	protein_coding
ENSDARG00000101206	2.54356	1.15038e-05	0.000123357	zgc:113363	protein_coding
ENSDARG00000102835	2.53901	1.8668e-15	1.42557e-13	CABZ01021435.1	protein_coding
ENSDARG00000014499	2.53598	3.48403e-06	4.3215e-05	nutf2l	protein_coding
ENSDARG00000005627	2.53435	2.32761e-06	3.02855e-05	zmp:0000000527	protein_coding
ENSDARG00000044415	2.53155	2.75346e-05	0.000263566	tlr5a	protein_coding
ENSDARG00000033544	2.52655	9.83793e-09	2.18278e-07	adamts15b	protein_coding
ENSDARG00000071578	2.52614	1.86006e-07	3.16887e-06	si:ch211-222k6.3	protein_coding
ENSDARG00000007990	2.52568	1.00077e-25	3.18937e-23	wt1b	protein_coding
ENSDARG00000058160	2.52279	1.74315e-07	2.98458e-06	tnfaip2b	protein_coding
ENSDARG00000078959	2.52212	3.69523e-07	5.80312e-06	tpcn3	protein_coding
ENSDARG00000092651	2.51929	1.09399e-09	2.96468e-08	si:dkey-57a22.11	protein_coding
ENSDARG00000061737	2.51915	2.52682e-05	0.000244321	ece1	protein_coding
ENSDARG00000001782	2.51863	3.33574e-05	0.000310237	prkacba	protein_coding
ENSDARG00000051854	2.51815	1.62109e-05	0.000166226	cdt1	protein_coding
ENSDARG00000039354	2.51772	1.01969e-07	1.84641e-06	ska1	protein_coding
ENSDARG00000042055	2.51758	0.0107357	0.0366555	fam129aa	protein_coding
ENSDARG00000104367	2.51672	2.029e-11	7.48414e-10	zgc:194469	protein_coding
ENSDARG00000093651	2.51542	3.92233e-06	4.80285e-05	ftr25	protein_coding
ENSDARG00000056026	2.51541	0.000167511	0.00121809	tprg1	protein_coding
ENSDARG00000061468	2.51441	1.84681e-10	5.77781e-09	ncaph	protein_coding
ENSDARG00000105482	2.51408	0.00172762	0.00848266	FP340257.1	protein_coding
ENSDARG00000034559	2.514	3.04236e-07	4.87457e-06	srpx2	protein_coding
ENSDARG00000089873	2.51348	1.96661e-07	3.32668e-06	socs1b	protein_coding
ENSDARG00000090664	2.51296	0.0122255	0.0407266	moto	protein_coding
ENSDARG00000086452	2.51205	2.38352e-05	0.00023225	dthd1	protein_coding
ENSDARG00000042784	2.50369	0.00415136	0.0170598	gdf7	protein_coding
ENSDARG00000117419	2.50169	1.44052e-05	0.000149701	CABZ01086029.1	lincRNA
ENSDARG00000034975	2.50114	1.23045e-09	3.2824e-08	gpr157	protein_coding
ENSDARG00000098925	2.50111	0.00191594	0.00921054	prdm1b	protein_coding
ENSDARG00000044001	2.50093	3.25233e-07	5.17559e-06	lgals3b	protein_coding
ENSDARG00000086840	2.50057	2.90929e-07	4.70169e-06	si:ch211-266k8.4	protein_coding
ENSDARG00000102555	2.49752	0.00487826	0.0193913	si:dkey-33i11.9	protein_coding
ENSDARG00000039020	2.49337	7.4876e-07	1.09461e-05	fbxo5	protein_coding
ENSDARG00000114825	2.49249	2.22174e-09	5.61354e-08	CABZ01077124.1	protein_coding
ENSDARG00000079826	2.48916	2.65817e-05	0.000255677	gpr174	protein_coding
ENSDARG00000087057	2.48548	0.000664312	0.00386612	ftr36	protein_coding
ENSDARG00000105328	2.48375	6.55694e-14	3.82254e-12	si:dkey-23a13.17	protein_coding
ENSDARG00000021924	2.482	0.000336003	0.00218594	hsp70.3	protein_coding
ENSDARG00000088040	2.48009	1.18399e-19	1.72886e-17	si:dkeyp-27c8.2	protein_coding
ENSDARG00000057706	2.47882	3.98073e-05	0.000359589	si:ch211-137i24.10	protein_coding
ENSDARG00000067711	2.47741	1.94129e-07	3.29083e-06	parvg	protein_coding
ENSDARG00000071463	2.47736	8.55278e-11	2.87927e-09	zgc:154125	protein_coding
ENSDARG00000005271	2.47512	0.0136608	0.0444366	zc3h12a	protein_coding
ENSDARG00000041361	2.47276	1.07919e-11	4.1404e-10	ttk	protein_coding
ENSDARG00000002235	2.47199	1.49848e-06	2.02354e-05	mmp14a	protein_coding
ENSDARG00000033971	2.47074	0.000396544	0.00250812	prrx1a	protein_coding
ENSDARG00000032849	2.47	0.00534763	0.0208264	ndrg1a	protein_coding
ENSDARG00000100061	2.46813	2.34808e-06	3.05187e-05	si:dkey-16p6.1	protein_coding
ENSDARG00000095351	2.46751	5.24459e-07	7.95407e-06	CU914776.1	processed_transcript
ENSDARG00000057738	2.46576	3.00442e-24	7.63953e-22	hells	protein_coding
ENSDARG00000097289	2.46285	0.00286749	0.0126564	BX629344.1	protein_coding
ENSDARG00000045681	2.46242	2.12631e-09	5.38951e-08	irf5	protein_coding
ENSDARG00000070542	2.46232	1.0276e-06	1.44396e-05	mafbb	protein_coding
ENSDARG00000058672	2.46144	0.00520497	0.0203949	nuggc.3	protein_coding
ENSDARG00000103860	2.46112	8.26158e-13	3.93363e-11	wu:fu71h07	protein_coding
ENSDARG00000040668	2.46001	0.00015611	0.0011474	lrrc51	protein_coding
ENSDARG00000034222	2.45998	1.0317e-06	1.44717e-05	hs1bp3	protein_coding
ENSDARG00000024537	2.4585	8.54213e-15	5.91809e-13	emilin1a	protein_coding
ENSDARG00000111165	2.45545	1.57672e-14	1.02689e-12	CR762436.2	protein_coding
ENSDARG00000097553	2.45457	1.33356e-05	0.000139863	BX908750.1	lincRNA
ENSDARG00000001767	2.45317	2.11178e-14	1.34244e-12	slc29a2	protein_coding
ENSDARG00000102468	2.45244	1.01968e-23	2.46186e-21	si:dkey-71l4.5	protein_coding
ENSDARG00000057630	2.45129	1.31823e-06	1.80253e-05	galm	protein_coding
ENSDARG00000071499	2.45097	0.000162093	0.00118481	cxcl32b.1	protein_coding
ENSDARG00000056379	2.45087	2.07409e-12	9.12982e-11	si:ch73-86n18.1	protein_coding
ENSDARG00000100348	2.44865	1.11621e-14	7.49426e-13	si:dkey-71l4.1	protein_coding
ENSDARG00000117808	2.44845	0.000852132	0.00474907	CABZ01068366.1	lincRNA
ENSDARG00000096037	2.44666	0.00107561	0.0057298	si:ch211-214j24.14	protein_coding
ENSDARG00000079372	2.44579	1.32328e-07	2.32737e-06	si:ch211-264f5.6	protein_coding
ENSDARG00000117807	2.44502	2.8242e-08	5.7844e-07	BX908744.2	lincRNA
ENSDARG00000070029	2.44313	2.67973e-05	0.000257543	ehhadh	protein_coding
ENSDARG00000009978	2.44256	4.38302e-09	1.05184e-07	icn	protein_coding
ENSDARG00000097015	2.43719	4.6653e-05	0.000411932	FP016018.2	lincRNA
ENSDARG00000053868	2.43692	0.00143584	0.00727974	etv2	protein_coding
ENSDARG00000053493	2.43625	0.00245225	0.0111858	aldh1a2	protein_coding
ENSDARG00000112528	2.436	1.03677e-12	4.8306e-11	CR354435.7	protein_coding
ENSDARG00000076144	2.43479	1.92137e-20	3.14552e-18	si:ch211-74m13.3	protein_coding
ENSDARG00000044807	2.43383	4.73705e-14	2.80955e-12	dck	protein_coding
ENSDARG00000097063	2.43181	0.000107821	0.000846072	sparcl2	protein_coding
ENSDARG00000089838	2.43169	6.79673e-08	1.29035e-06	si:dkey-262k9.4	protein_coding
ENSDARG00000005023	2.42955	2.4016e-07	3.97529e-06	fkbp9	protein_coding
ENSDARG00000020956	2.42933	2.35794e-05	0.000230132	pck2	protein_coding
ENSDARG00000099476	2.42829	3.76852e-29	1.73221e-26	zgc:174863	protein_coding
ENSDARG00000075891	2.42501	1.11388e-18	1.33788e-16	sall1b	protein_coding
ENSDARG00000073675	2.42369	5.49832e-10	1.5739e-08	tlr8b	protein_coding
ENSDARG00000052097	2.41522	1.9304e-08	4.09047e-07	trim35-31	protein_coding
ENSDARG00000091836	2.41437	1.02643e-12	4.79174e-11	casp7	protein_coding
ENSDARG00000020981	2.41339	0.0158357	0.0499545	slc35a3b	protein_coding
ENSDARG00000019949	2.41255	0.00133834	0.00687638	serpinh1b	protein_coding
ENSDARG00000091555	2.4118	5.81372e-11	2.01099e-09	ostf1	protein_coding
ENSDARG00000044752	2.40855	0.00561462	0.0216895	p2rx4a	protein_coding
ENSDARG00000022841	2.40695	5.20553e-12	2.14153e-10	ptk2ba	protein_coding
ENSDARG00000076716	2.4009	1.61085e-06	2.16063e-05	palb2	protein_coding
ENSDARG00000099124	2.40074	6.26478e-09	1.45521e-07	f3a	protein_coding
ENSDARG00000075433	2.39747	4.05142e-06	4.93563e-05	myom2a	protein_coding
ENSDARG00000040192	2.39643	2.77828e-10	8.3112e-09	nenf	protein_coding
ENSDARG00000094466	2.39622	0.000402904	0.00254096	si:ch73-199e17.1	protein_coding
ENSDARG00000073789	2.3952	2.55364e-10	7.71943e-09	zmp:0000000735	protein_coding
ENSDARG00000042925	2.39519	1.32635e-13	7.2712e-12	mfng	protein_coding
ENSDARG00000017121	2.38972	2.11784e-11	7.7998e-10	mafba	protein_coding
ENSDARG00000096603	2.38893	0.00138158	0.00705909	bmb	protein_coding
ENSDARG00000095274	2.38839	0.00329128	0.0141617	si:ch211-278p9.2	protein_coding
ENSDARG00000077308	2.38503	0.00116283	0.00611124	gpr84	protein_coding
ENSDARG00000099465	2.38426	5.84016e-15	4.19194e-13	rnf213a	protein_coding
ENSDARG00000091699	2.3834	6.74678e-09	1.55959e-07	capn2a	protein_coding
ENSDARG00000102655	2.38271	3.15253e-05	0.000295835	CABZ01050398.1	protein_coding
ENSDARG00000070656	2.38264	3.31301e-09	8.0969e-08	si:ch211-69g19.2	protein_coding
ENSDARG00000111315	2.38138	0.000277359	0.00185907	CT583642.2	protein_coding
ENSDARG00000113257	2.38131	0.00360399	0.0152465	FO704821.1	protein_coding
ENSDARG00000117624	2.37968	0.00321777	0.0139029	BX545917.5	lincRNA
ENSDARG00000054414	2.37803	0.0010004	0.00540864	spata17	protein_coding
ENSDARG00000077414	2.37698	8.49676e-09	1.9141e-07	zgc:194312	protein_coding
ENSDARG00000055901	2.37536	0.000148032	0.00109714	steap4	protein_coding
ENSDARG00000005464	2.37001	3.62063e-08	7.26009e-07	dnase1l1	protein_coding
ENSDARG00000073716	2.36992	0.000110143	0.000860617	cpxm1a	protein_coding
ENSDARG00000040110	2.36903	2.90819e-13	1.50133e-11	kif20bb	protein_coding
ENSDARG00000115766	2.36621	0.00016992	0.00123335	si:ch73-36p18.1	protein_coding
ENSDARG00000059231	2.35816	1.41961e-10	4.57299e-09	hephl1a	protein_coding
ENSDARG00000060319	2.35617	1.49771e-08	3.2338e-07	scn4bb	protein_coding
ENSDARG00000105562	2.356	7.45287e-07	1.09087e-05	si:dkey-23i12.7	protein_coding
ENSDARG00000079175	2.35514	1.04061e-09	2.82643e-08	si:ch211-79k12.1	protein_coding
ENSDARG00000060435	2.35426	4.49911e-05	0.0003993	bnipl	protein_coding
ENSDARG00000077130	2.35418	3.61332e-14	2.21141e-12	bcl10	protein_coding
ENSDARG00000074362	2.3541	1.29278e-11	4.92037e-10	zgc:165582	protein_coding
ENSDARG00000114670	2.35326	9.69271e-09	2.15769e-07	ube2c	protein_coding
ENSDARG00000012485	2.35172	8.12962e-07	1.17624e-05	aurka	protein_coding
ENSDARG00000071684	2.35061	0.0010778	0.00574008	rx1	protein_coding
ENSDARG00000062711	2.34731	0.000189623	0.00135197	gal3st1a	protein_coding
ENSDARG00000077179	2.34667	3.22166e-05	0.000301355	ccdc83	protein_coding
ENSDARG00000005368	2.34354	1.26163e-08	2.76402e-07	mcamb	protein_coding
ENSDARG00000024471	2.34194	0.000879423	0.00486912	nsl1	protein_coding
ENSDARG00000114084	2.3417	5.97504e-06	6.91813e-05	RF00017	misc_RNA
ENSDARG00000042180	2.34055	0.00251138	0.0114077	foxl2a	protein_coding
ENSDARG00000036308	2.33886	2.24097e-10	6.8867e-09	nod1	protein_coding
ENSDARG00000094295	2.33855	1.25541e-12	5.74845e-11	CR855337.1	lincRNA
ENSDARG00000023584	2.33851	3.36094e-07	5.33067e-06	cdc7	protein_coding
ENSDARG00000026577	2.33742	1.37376e-08	2.98505e-07	cdk2	protein_coding
ENSDARG00000029179	2.33556	0.000738441	0.0042209	foxd1	protein_coding
ENSDARG00000101975	2.33316	2.92903e-07	4.72395e-06	BX682558.1	protein_coding
ENSDARG00000113643	2.3321	1.47581e-06	1.99518e-05	ralbb	protein_coding
ENSDARG00000063191	2.33138	2.38716e-07	3.95687e-06	extl2	protein_coding
ENSDARG00000077220	2.33108	1.99641e-13	1.06752e-11	si:ch211-208f21.3	protein_coding
ENSDARG00000071304	2.33107	3.46857e-08	6.99036e-07	tbc1d2	protein_coding
ENSDARG00000029955	2.3302	7.57615e-12	3.00806e-10	glb1l	protein_coding
ENSDARG00000103754	2.32735	2.75119e-13	1.42644e-11	aspm	protein_coding
ENSDARG00000093572	2.32443	0.000656304	0.00383076	lamc3	protein_coding
ENSDARG00000054054	2.3244	7.29164e-05	0.00060505	zgc:153219	protein_coding
ENSDARG00000099390	2.32371	3.39369e-05	0.000314647	lama2	protein_coding
ENSDARG00000021242	2.32315	7.99574e-12	3.1537e-10	mvp	protein_coding
ENSDARG00000113820	2.32311	0.00284913	0.0125994	cyp46a1.4	protein_coding
ENSDARG00000095458	2.32178	0.00363114	0.0153342	si:dkey-240h12.3	protein_coding
ENSDARG00000020759	2.31814	4.55099e-15	3.28633e-13	elf1	protein_coding
ENSDARG00000006901	2.31675	5.06441e-06	5.98959e-05	si:ch1073-459j12.1	protein_coding
ENSDARG00000034895	2.31378	5.37224e-09	1.26385e-07	tgfb1b	protein_coding
ENSDARG00000098114	2.31169	2.49009e-11	9.11457e-10	ctsa	protein_coding
ENSDARG00000073965	2.30518	0.00314519	0.0136461	si:dkey-202b22.5	protein_coding
ENSDARG00000035879	2.30333	4.99896e-07	7.60568e-06	fuca1.2	protein_coding
ENSDARG00000098398	2.30304	4.03499e-10	1.18337e-08	CABZ01079480.1	protein_coding
ENSDARG00000058937	2.30283	0.0146942	0.0471249	cldn10a	protein_coding
ENSDARG00000008811	2.30238	9.89046e-15	6.73509e-13	cmtm3	protein_coding
ENSDARG00000069917	2.30089	4.71282e-06	5.61825e-05	ska3	protein_coding
ENSDARG00000051940	2.30031	4.00007e-05	0.000361064	ugt2a4	protein_coding
ENSDARG00000116994	2.2995	1.86432e-05	0.000188744	CABZ01109480.1	protein_coding
ENSDARG00000091746	2.29897	0.00441411	0.0179158	si:dkey-16p6.1	protein_coding
ENSDARG00000090734	2.29804	1.67757e-17	1.75097e-15	si:dkey-196n19.2	protein_coding
ENSDARG00000045367	2.29781	0.000857318	0.00477437	tuba1b	protein_coding
ENSDARG00000091411	2.29471	0.000236145	0.0016238	si:ch211-214p13.9	protein_coding
ENSDARG00000031246	2.29396	1.30031e-09	3.44949e-08	hbegfb	protein_coding
ENSDARG00000061351	2.29139	4.56636e-06	5.47094e-05	tfpi2	protein_coding
ENSDARG00000104557	2.2896	0.00154448	0.00772629	CR318653.1	antisense
ENSDARG00000075229	2.28903	6.27497e-09	1.45616e-07	slc46a2	protein_coding
ENSDARG00000045408	2.289	0.000163841	0.00119649	tagln	protein_coding
ENSDARG00000003931	2.28881	9.92837e-08	1.80875e-06	cndp2	protein_coding
ENSDARG00000100639	2.28869	0.00803262	0.0289849	CR847939.1	lincRNA
ENSDARG00000112045	2.28838	1.20986e-16	1.10374e-14	AXL	protein_coding
ENSDARG00000035859	2.28659	3.47063e-07	5.48645e-06	angptl4	protein_coding
ENSDARG00000103184	2.28389	1.37858e-06	1.87327e-05	PAMR1 (1 of many)	protein_coding
ENSDARG00000095015	2.2837	0.0030889	0.0134581	BX571955.2	processed_transcript
ENSDARG00000077114	2.28341	3.66863e-06	4.5236e-05	arhgef16	protein_coding
ENSDARG00000101514	2.28335	2.41061e-08	4.99727e-07	ftr64	protein_coding
ENSDARG00000058252	2.28228	6.6208e-05	0.000557134	adamts15b	protein_coding
ENSDARG00000067851	2.28105	9.45862e-05	0.000755868	lcn15	protein_coding
ENSDARG00000069542	2.27922	0.0125914	0.0416439	si:dkey-8e10.2	protein_coding
ENSDARG00000055398	2.27911	5.00776e-06	5.93434e-05	foxc1b	protein_coding
ENSDARG00000060049	2.27816	0.00238031	0.0109475	zgc:195075	protein_coding
ENSDARG00000014793	2.27705	6.52882e-21	1.13906e-18	ehd1b	protein_coding
ENSDARG00000009087	2.27587	3.91243e-24	9.84368e-22	cd74a	protein_coding
ENSDARG00000090537	2.27452	1.95266e-20	3.175e-18	ifit11	protein_coding
ENSDARG00000070606	2.27444	1.56608e-09	4.07318e-08	ikbke	protein_coding
ENSDARG00000115281	2.27199	7.10555e-09	1.63462e-07	CU302436.5	protein_coding
ENSDARG00000039007	2.2711	3.95866e-08	7.89156e-07	eno3	protein_coding
ENSDARG00000071014	2.26839	8.14856e-09	1.84438e-07	s100u	protein_coding
ENSDARG00000052496	2.26668	2.34106e-09	5.90253e-08	hmha1a	protein_coding
ENSDARG00000028912	2.26665	0.00212615	0.0100281	si:dkey-10h3.2	protein_coding
ENSDARG00000090851	2.26651	2.57387e-09	6.40839e-08	ciita	protein_coding
ENSDARG00000035809	2.26597	1.97007e-06	2.60446e-05	col1a1b	protein_coding
ENSDARG00000043137	2.26574	4.1424e-09	9.99108e-08	cdca8	protein_coding
ENSDARG00000043701	2.26404	0.00159341	0.00792954	gpd1a	protein_coding
ENSDARG00000067723	2.26299	7.80019e-09	1.77393e-07	tank	protein_coding
ENSDARG00000034773	2.25889	3.04852e-12	1.29886e-10	ncapd3	protein_coding
ENSDARG00000094350	2.25874	2.77374e-05	0.000264979	si:ch211-187g4.1	protein_coding
ENSDARG00000044254	2.25426	9.81714e-44	1.67607e-40	anxa3b	protein_coding
ENSDARG00000039871	2.25052	4.21321e-07	6.51859e-06	rpz4	protein_coding
ENSDARG00000078050	2.24936	1.65454e-11	6.20829e-10	phf19	protein_coding
ENSDARG00000019907	2.24845	5.13443e-08	9.97639e-07	dscc1	protein_coding
ENSDARG00000092470	2.24726	0.000713888	0.00410826	thbd	protein_coding
ENSDARG00000090904	2.24694	6.09536e-06	7.03823e-05	RNF219	protein_coding
ENSDARG00000074321	2.24372	2.74774e-07	4.49254e-06	tead3a	protein_coding
ENSDARG00000099385	2.24356	2.92465e-05	0.000277401	CT030188.1	protein_coding
ENSDARG00000101919	2.24338	2.4711e-09	6.17827e-08	foxj1a	protein_coding
ENSDARG00000089582	2.24268	2.99181e-05	0.000282487	si:dkey-265e15.2	protein_coding
ENSDARG00000042927	2.24224	4.1129e-14	2.47624e-12	mapre1a	protein_coding
ENSDARG00000042521	2.24175	0.00214577	0.0100961	si:dkey-251i10.1	protein_coding
ENSDARG00000027992	2.24171	0.00422123	0.0173063	hao2	protein_coding
ENSDARG00000102291	2.24026	1.47684e-08	3.19162e-07	eef1da	protein_coding
ENSDARG00000097993	2.23385	5.13804e-08	9.97639e-07	si:ch211-191c10.1	protein_coding
ENSDARG00000071549	2.23342	0.000900495	0.0049605	ecm2	protein_coding
ENSDARG00000041394	2.23334	2.37712e-10	7.24719e-09	dnajb1b	protein_coding
ENSDARG00000097533	2.2319	2.33804e-07	3.89706e-06	BX571880.1	lincRNA
ENSDARG00000028306	2.23186	5.34165e-10	1.53457e-08	prph	protein_coding
ENSDARG00000099148	2.23185	5.48201e-10	1.57112e-08	bzw1b	protein_coding
ENSDARG00000086996	2.23173	1.27687e-07	2.25905e-06	si:ch73-234b20.5	protein_coding
ENSDARG00000005454	2.23169	1.07137e-08	2.36673e-07	tacc3	protein_coding
ENSDARG00000104852	2.23006	0.00349472	0.0148789	si:ch211-142b24.8	protein_coding
ENSDARG00000098540	2.22959	3.29885e-08	6.68779e-07	zc3h7ba	protein_coding
ENSDARG00000063313	2.2292	2.6286e-08	5.42562e-07	plbd1	protein_coding
ENSDARG00000093622	2.22694	7.08915e-07	1.04596e-05	spc24	protein_coding
ENSDARG00000041505	2.22541	3.53671e-12	1.49884e-10	itm2bb	protein_coding
ENSDARG00000052322	2.22529	9.0829e-07	1.29226e-05	tlr5b	protein_coding
ENSDARG00000004618	2.22488	1.34279e-07	2.35995e-06	stx2a	protein_coding
ENSDARG00000117133	2.22391	1.78358e-10	5.60937e-09	cst14b.1	protein_coding
ENSDARG00000113329	2.22382	0.00231773	0.0107403	CU571081.1	protein_coding
ENSDARG00000057879	2.22279	5.457e-06	6.41265e-05	p3h3	protein_coding
ENSDARG00000076189	2.21898	1.25081e-10	4.0676e-09	ccdc88b	protein_coding
ENSDARG00000091111	2.21779	5.61235e-11	1.94415e-09	si:ch211-15b10.6	protein_coding
ENSDARG00000102228	2.21435	2.42754e-09	6.07571e-08	si:dkey-171c9.3	protein_coding
ENSDARG00000112943	2.21381	9.68838e-15	6.63529e-13	adgre5b.3	protein_coding
ENSDARG00000114195	2.21279	0.00188021	0.00907389	CU302436.3	protein_coding
ENSDARG00000006112	2.2102	3.63593e-06	4.49126e-05	myof	protein_coding
ENSDARG00000090912	2.21017	3.29848e-07	5.23856e-06	npc2	protein_coding
ENSDARG00000014329	2.20969	1.29778e-07	2.29264e-06	npm1a	protein_coding
ENSDARG00000077249	2.20901	3.75017e-07	5.88552e-06	gmip	protein_coding
ENSDARG00000032318	2.20701	0.000134051	0.00101043	mfsd6a	protein_coding
ENSDARG00000028336	2.20697	4.93523e-05	0.00043257	dhdhl	protein_coding
ENSDARG00000033071	2.20502	2.1117e-05	0.000210132	trim35-10	protein_coding
ENSDARG00000061764	2.20438	0.000113343	0.000882165	ahnak	protein_coding
ENSDARG00000036057	2.19892	9.44037e-08	1.73306e-06	tradd	protein_coding
ENSDARG00000076767	2.19796	0.00292749	0.012865	pgfb	protein_coding
ENSDARG00000022712	2.19651	4.5298e-38	6.01508e-35	stat3	protein_coding
ENSDARG00000036785	2.19543	9.09834e-06	0.00010054	si:ch211-226m16.2	protein_coding
ENSDARG00000069376	2.19527	3.18496e-09	7.79989e-08	tnfsf12	protein_coding
ENSDARG00000058479	2.1952	0.000191862	0.00136526	zgc:110425	protein_coding
ENSDARG00000061600	2.19285	4.07427e-06	4.95589e-05	cemip2	protein_coding
ENSDARG00000076844	2.1924	0.00285688	0.012622	plin6	protein_coding
ENSDARG00000053010	2.19191	0.000161377	0.0011803	lpcat2	protein_coding
ENSDARG00000117684	2.19121	1.50441e-06	2.02926e-05	BX908744.1	lincRNA
ENSDARG00000034470	2.19078	1.07418e-05	0.00011644	aldoab	protein_coding
ENSDARG00000091598	2.18728	1.50913e-08	3.25553e-07	si:ch73-91k6.2	protein_coding
ENSDARG00000098929	2.18616	5.76346e-07	8.65859e-06	tex15	protein_coding
ENSDARG00000055966	2.18509	1.29224e-23	3.08871e-21	cflara	protein_coding
ENSDARG00000041959	2.18459	6.09154e-09	1.41985e-07	cxcr4b	protein_coding
ENSDARG00000068759	2.1841	2.49823e-09	6.23957e-08	si:ch211-244o22.2	protein_coding
ENSDARG00000013056	2.1835	0.00183268	0.00888353	itpk1a	protein_coding
ENSDARG00000057241	2.18338	1.98304e-11	7.34735e-10	tnfsf10	protein_coding
ENSDARG00000105578	2.18298	0.000165056	0.00120463	amfrb	protein_coding
ENSDARG00000078069	2.18283	1.31309e-18	1.56147e-16	rrm2	protein_coding
ENSDARG00000008170	2.18075	0.000426201	0.00265981	dbnla	protein_coding
ENSDARG00000100741	2.18009	1.91015e-07	3.24495e-06	cdc20	protein_coding
ENSDARG00000113087	2.17946	0.000576695	0.00342634	BX569796.1	protein_coding
ENSDARG00000024631	2.17925	1.63598e-10	5.19989e-09	nlrc5	protein_coding
ENSDARG00000086550	2.17868	0.000198038	0.00140047	dbf4b	protein_coding
ENSDARG00000078754	2.17572	0.00508288	0.0200249	gra	protein_coding
ENSDARG00000040072	2.17411	1.2975e-12	5.91032e-11	scpep1	protein_coding
ENSDARG00000104412	2.17333	1.11605e-16	1.02995e-14	si:dkey-72l17.5	protein_coding
ENSDARG00000092455	2.17328	1.97263e-06	2.60497e-05	si:ch211-246e12.3	protein_coding
ENSDARG00000043899	2.17129	9.14132e-12	3.56437e-10	psma6l	protein_coding
ENSDARG00000075592	2.17017	1.9449e-10	6.053e-09	tnfaip8l2a	protein_coding
ENSDARG00000078101	2.16913	9.21438e-05	0.000738325	nlrc9	protein_coding
ENSDARG00000013476	2.16889	1.37657e-06	1.87267e-05	arhgef39	protein_coding
ENSDARG00000100461	2.16866	1.3955e-09	3.68159e-08	CABZ01078737.1	protein_coding
ENSDARG00000067596	2.16653	0.000481735	0.00294788	fancb	protein_coding
ENSDARG00000109755	2.16522	0.00103119	0.00553629	hist1h2a2	protein_coding
ENSDARG00000092725	2.16382	0.00190221	0.00916111	si:dkey-188i13.8	protein_coding
ENSDARG00000043640	2.16085	4.29032e-07	6.62449e-06	cenpn	protein_coding
ENSDARG00000105393	2.1594	2.60996e-06	3.33957e-05	zgc:112234	protein_coding
ENSDARG00000105739	2.15893	0.00382766	0.0159917	LO018260.2	protein_coding
ENSDARG00000053666	2.15745	8.22706e-08	1.53388e-06	myb	protein_coding
ENSDARG00000089933	2.15624	0.000151339	0.00111749	rasal3	protein_coding
ENSDARG00000069017	2.15588	0.000305181	0.0020223	elnb	protein_coding
ENSDARG00000117230	2.15486	0.00647913	0.0244227	CU179656.2	lincRNA
ENSDARG00000110745	2.15335	0.00325119	0.0140228	znf994	protein_coding
ENSDARG00000014248	2.15253	0.000102243	0.00080814	pdlim3b	protein_coding
ENSDARG00000012694	2.15218	0.00219223	0.0102742	c3a.1	protein_coding
ENSDARG00000062081	2.15206	2.62327e-09	6.51782e-08	tbc1d1	protein_coding
ENSDARG00000105187	2.14981	5.74274e-05	0.000493043	gcshb	protein_coding
ENSDARG00000006468	2.14937	3.48082e-11	1.25488e-09	grap2a	protein_coding
ENSDARG00000095184	2.14905	1.3092e-08	2.85516e-07	si:ch73-52p7.1	protein_coding
ENSDARG00000096315	2.14821	0.0158047	0.0498895	FP236454.2	antisense
ENSDARG00000002748	2.1474	1.09328e-06	1.52638e-05	sema6d	protein_coding
ENSDARG00000079745	2.14692	1.22089e-12	5.6011e-11	si:ch211-166a6.5	protein_coding
ENSDARG00000062263	2.14528	5.32949e-16	4.51722e-14	arhgap17b	protein_coding
ENSDARG00000076733	2.14452	2.48055e-12	1.078e-10	bard1	protein_coding
ENSDARG00000101721	2.1442	0.0136227	0.044349	LO018584.1	protein_coding
ENSDARG00000078989	2.14382	0.00244994	0.0111817	alpk3a	protein_coding
ENSDARG00000095377	2.14224	0.00144377	0.00730812	CR388207.1	antisense
ENSDARG00000092878	2.13979	0.00460474	0.018529	si:dkeyp-85e10.3	protein_coding
ENSDARG00000117089	2.13976	8.97656e-06	9.92864e-05	CKS2	protein_coding
ENSDARG00000059746	2.13701	7.45245e-09	1.70458e-07	plod1a	protein_coding
ENSDARG00000097473	2.13686	2.88529e-05	0.000274514	zgc:113340	protein_coding
ENSDARG00000088656	2.13652	0.000308738	0.00204062	si:ch211-212k18.6	protein_coding
ENSDARG00000079031	2.13593	0.000888622	0.00490754	si:ch211-22d5.2	protein_coding
ENSDARG00000100161	2.13557	0.00792078	0.0286722	CR382337.2	protein_coding
ENSDARG00000003469	2.13406	0.000106273	0.000835285	neurod4	protein_coding
ENSDARG00000018165	2.13172	1.92338e-08	4.07921e-07	depdc1a	protein_coding
ENSDARG00000077139	2.13038	1.41047e-07	2.46441e-06	col6a3	protein_coding
ENSDARG00000032631	2.12902	7.14558e-08	1.34695e-06	ltb4r	protein_coding
ENSDARG00000077473	2.12881	3.64708e-18	4.0926e-16	mych	protein_coding
ENSDARG00000099767	2.12623	2.345e-05	0.000229244	fhdc2	protein_coding
ENSDARG00000052741	2.12588	1.63557e-20	2.71481e-18	card11	protein_coding
ENSDARG00000097493	2.12409	0.00341664	0.0146012	si:dkey-148h10.5	protein_coding
ENSDARG00000070165	2.12362	2.39585e-06	3.10214e-05	tnfrsf1b	protein_coding
ENSDARG00000094485	2.1226	6.91082e-08	1.30786e-06	si:dkey-27h10.2	protein_coding
ENSDARG00000091140	2.12226	1.86304e-05	0.000188744	pik3r6b	protein_coding
ENSDARG00000028731	2.12147	2.09548e-13	1.11302e-11	stat4	protein_coding
ENSDARG00000105551	2.12125	5.35212e-08	1.03668e-06	si:cabz01101003.1	protein_coding
ENSDARG00000014954	2.12123	1.41137e-09	3.71935e-08	snx33	protein_coding
ENSDARG00000101084	2.12079	0.000260545	0.00176119	CABZ01069184.1	protein_coding
ENSDARG00000099448	2.12048	0.000325898	0.00212831	sh3d21	protein_coding
ENSDARG00000063435	2.11823	0.00373413	0.0156749	trpm4b.2	protein_coding
ENSDARG00000025301	2.11789	1.17707e-14	7.85876e-13	gfap	protein_coding
ENSDARG00000014340	2.11661	3.22259e-05	0.000301355	rab11al	protein_coding
ENSDARG00000001933	2.1159	9.61028e-05	0.000766449	prkag2b	protein_coding
ENSDARG00000010625	2.11494	1.63887e-13	8.8826e-12	clic2	protein_coding
ENSDARG00000079133	2.11342	0.00149501	0.00752606	si:dkey-10c21.1	protein_coding
ENSDARG00000038489	2.11307	0.000218875	0.00152213	b3gnt7	protein_coding
ENSDARG00000040465	2.112	3.25465e-11	1.17868e-09	irf2	protein_coding
ENSDARG00000094451	2.10709	4.71175e-07	7.2054e-06	cfp	protein_coding
ENSDARG00000095111	2.10527	0.000311437	0.00205524	si:dkey-192k22.2	protein_coding
ENSDARG00000096859	2.10444	6.36414e-10	1.80019e-08	si:ch211-286b4.4	protein_coding
ENSDARG00000014091	2.10393	0.00594635	0.0227517	osr1	protein_coding
ENSDARG00000067958	2.10361	0.00677251	0.0252735	sh3gl1a	protein_coding
ENSDARG00000016837	2.1033	5.14628e-06	6.07139e-05	glipr2l	protein_coding
ENSDARG00000041703	2.10318	0.00176866	0.00864508	rrbp1b	protein_coding
ENSDARG00000101700	2.10253	0.00552352	0.0213818	si:ch1073-181h11.1	protein_coding
ENSDARG00000104850	2.09924	2.68994e-06	3.42724e-05	si:dkey-16p6.1	protein_coding
ENSDARG00000104077	2.09762	2.10427e-10	6.48985e-09	fcer1gl	protein_coding
ENSDARG00000052176	2.0961	0.00102896	0.00552823	zgc:171711	protein_coding
ENSDARG00000058538	2.09482	2.5938e-12	1.1211e-10	alcamb	protein_coding
ENSDARG00000044345	2.09402	5.54287e-12	2.26859e-10	cyfip1	protein_coding
ENSDARG00000018008	2.094	2.00151e-05	0.000200503	mdh1b	protein_coding
ENSDARG00000053136	2.09342	1.33087e-16	1.20494e-14	b2m	protein_coding
ENSDARG00000078114	2.08951	2.00281e-12	8.8323e-11	cfp	protein_coding
ENSDARG00000102435	2.08882	2.57859e-12	1.11655e-10	plekhf1	protein_coding
ENSDARG00000075092	2.08713	0.00087849	0.00486733	si:dkey-52l18.4	protein_coding
ENSDARG00000098387	2.08676	1.08433e-11	4.15346e-10	tmem176l.3a	protein_coding
ENSDARG00000062040	2.08575	1.43963e-12	6.48025e-11	atp8b5a	protein_coding
ENSDARG00000103636	2.08542	0.00831389	0.0298421	zgc:174703	protein_coding
ENSDARG00000075621	2.08272	7.47143e-06	8.40605e-05	birc5a	protein_coding
ENSDARG00000040492	2.08017	4.13414e-09	9.98123e-08	mthfd1b	protein_coding
ENSDARG00000095915	2.07765	0.000149216	0.00110454	col6a3	protein_coding
ENSDARG00000055436	2.07585	1.75224e-12	7.78477e-11	ftr97	protein_coding
ENSDARG00000005481	2.07553	2.58852e-08	5.34752e-07	nfkbiaa	protein_coding
ENSDARG00000012390	2.07448	0.00552084	0.0213779	kcnk5b	protein_coding
ENSDARG00000037393	2.06703	5.25738e-05	0.000456952	slc43a1a	protein_coding
ENSDARG00000041828	2.06481	0.00396437	0.016445	si:dkeyp-28d2.4	protein_coding
ENSDARG00000045887	2.06413	0.000181114	0.00130031	mmp30	protein_coding
ENSDARG00000103317	2.06365	8.9053e-13	4.21494e-11	capn5a	protein_coding
ENSDARG00000105479	2.06342	1.69191e-08	3.60749e-07	si:ch211-126c2.4	protein_coding
ENSDARG00000095133	2.0633	0.0116725	0.0392731	si:ch211-165f21.2	protein_coding
ENSDARG00000002403	2.06222	4.63669e-09	1.10495e-07	nusap1	protein_coding
ENSDARG00000004697	2.06058	0.0019734	0.00944117	rxrgb	protein_coding
ENSDARG00000077631	2.05969	2.30129e-06	2.9992e-05	CU459089.1	processed_transcript
ENSDARG00000089570	2.05853	0.00269454	0.0120744	ccdc169	protein_coding
ENSDARG00000042876	2.05514	4.32097e-08	8.55668e-07	abracl	protein_coding
ENSDARG00000030357	2.05368	0.000419816	0.00262768	zgc:66313	protein_coding
ENSDARG00000100693	2.05295	1.71483e-10	5.43606e-09	ddr2a	protein_coding
ENSDARG00000007358	2.05244	0.00063173	0.00370815	cxcr3.1	protein_coding
ENSDARG00000059917	2.05193	0.00143398	0.00727241	ccnj	protein_coding
ENSDARG00000069675	2.05109	3.94985e-07	6.15044e-06	her8.2	protein_coding
ENSDARG00000097510	2.05054	0.00675729	0.0252403	si:dkey-245f22.3	protein_coding
ENSDARG00000028106	2.05037	4.6321e-06	5.53305e-05	glrx	protein_coding
ENSDARG00000030092	2.04987	2.75092e-07	4.49436e-06	tram2	protein_coding
ENSDARG00000079808	2.0491	3.07687e-05	0.000289242	si:ch73-208g10.1	protein_coding
ENSDARG00000020237	2.04839	0.00197155	0.00943454	mc1r	protein_coding
ENSDARG00000104588	2.04835	5.11768e-06	6.04362e-05	zgc:112234	protein_coding
ENSDARG00000022807	2.04832	1.57269e-07	2.72198e-06	zgc:101640	protein_coding
ENSDARG00000073786	2.04831	2.51207e-08	5.19407e-07	cmbl	protein_coding
ENSDARG00000059259	2.04824	0.00037411	0.0023909	pabpc4	protein_coding
ENSDARG00000030961	2.04781	5.80153e-09	1.35949e-07	ak8	protein_coding
ENSDARG00000100573	2.04747	3.05457e-16	2.65492e-14	ckap2l	protein_coding
ENSDARG00000104765	2.04702	5.70936e-07	8.58271e-06	chek1	protein_coding
ENSDARG00000009014	2.04679	0.000116505	0.000902658	col11a1b	protein_coding
ENSDARG00000039065	2.04581	1.25029e-07	2.21695e-06	trpc2a	protein_coding
ENSDARG00000041108	2.04359	2.07107e-10	6.40397e-09	ctsh	protein_coding
ENSDARG00000101749	2.04339	0.00140111	0.00713602	zgc:92161	protein_coding
ENSDARG00000100842	2.04096	0.000863467	0.00479744	si:dkey-156k2.3	protein_coding
ENSDARG00000068711	2.04067	1.91822e-10	5.97776e-09	crfb4	protein_coding
ENSDARG00000104640	2.03851	0.00208839	0.00988058	BX511034.7	protein_coding
ENSDARG00000040621	2.03796	1.11597e-05	0.000120045	lrrc32	protein_coding
ENSDARG00000057143	2.03719	0.0112702	0.0381614	nradd	protein_coding
ENSDARG00000042637	2.03383	4.33239e-09	1.04178e-07	tert	protein_coding
ENSDARG00000017811	2.03328	1.10041e-15	8.8262e-14	si:ch211-210c8.6	protein_coding
ENSDARG00000003113	2.03114	2.10681e-12	9.25679e-11	ada	protein_coding
ENSDARG00000087144	2.03068	0.00151441	0.00760929	fam183a	protein_coding
ENSDARG00000094578	2.02907	2.41268e-09	6.05755e-08	epsti1	protein_coding
ENSDARG00000052429	2.02899	3.90346e-11	1.39671e-09	syngr2a	protein_coding
ENSDARG00000029722	2.0289	4.82078e-13	2.39556e-11	hmgb2a	protein_coding
ENSDARG00000068367	2.02815	1.87435e-12	8.29642e-11	nfkbie	protein_coding
ENSDARG00000045683	2.02791	0.000794132	0.00447251	ccdc87	protein_coding
ENSDARG00000071294	2.02784	8.35363e-11	2.8162e-09	tonsl	protein_coding
ENSDARG00000058325	2.02698	1.69062e-07	2.90087e-06	casp8	protein_coding
ENSDARG00000013460	2.02545	9.39937e-05	0.000751384	wfikkn2a	protein_coding
ENSDARG00000074081	2.0253	1.06073e-05	0.000115275	dnai2b	protein_coding
ENSDARG00000061784	2.02482	0.000231233	0.00159599	arhgap25	protein_coding
ENSDARG00000062222	2.02314	1.98278e-09	5.07413e-08	mxra8a	protein_coding
ENSDARG00000058964	2.01974	5.91591e-05	0.000505368	themis2	protein_coding
ENSDARG00000107280	2.01875	4.37788e-07	6.74662e-06	FO744833.1	protein_coding
ENSDARG00000023724	2.01827	6.65334e-08	1.26686e-06	cdc42se1	protein_coding
ENSDARG00000010756	2.01732	2.91791e-07	4.70925e-06	nod2	protein_coding
ENSDARG00000101161	2.01713	0.000143614	0.00107003	orc4	protein_coding
ENSDARG00000026070	2.01669	4.17208e-08	8.2756e-07	cd82b	protein_coding
ENSDARG00000117637	2.01522	7.58584e-05	0.000626522	CABZ01005379.1	lincRNA
ENSDARG00000043148	2.01394	2.0006e-08	4.21307e-07	slc1a3b	protein_coding
ENSDARG00000086963	2.01166	5.63051e-05	0.000484975	BX649442.1	lincRNA
ENSDARG00000077516	2.01161	1.08216e-10	3.55789e-09	recql4	protein_coding
ENSDARG00000102441	2.00978	2.51114e-09	6.26528e-08	ctnna1	protein_coding
ENSDARG00000096229	2.00759	6.265e-05	0.00053158	si:dkey-260c8.8	protein_coding
ENSDARG00000103659	2.00739	0.000863759	0.00479795	bco1l	protein_coding
ENSDARG00000041919	2.0061	0.00571315	0.0220145	ccl38.1	protein_coding
ENSDARG00000042440	2.00571	0.000261772	0.00176798	p2rx7	protein_coding
ENSDARG00000007971	2.00222	6.52376e-05	0.000550993	cks1b	protein_coding
ENSDARG00000098383	2.00199	0.000128942	0.000981212	si:dkey-14o6.1	protein_coding
ENSDARG00000021982	1.99928	6.52073e-10	1.84012e-08	sh3bp2	protein_coding
ENSDARG00000024278	1.9991	2.37756e-05	0.000231764	adh8b	protein_coding
ENSDARG00000045070	1.99885	1.79103e-10	5.62539e-09	itgb3b	protein_coding
ENSDARG00000102320	1.99775	9.54183e-12	3.69642e-10	mob1a	protein_coding
ENSDARG00000044982	1.99559	7.2554e-12	2.89514e-10	dhrs3a	protein_coding
ENSDARG00000117566	1.99546	8.15972e-12	3.20779e-10	BX005005.2	lincRNA
ENSDARG00000105483	1.99493	0.00226126	0.0105174	zgc:112234	protein_coding
ENSDARG00000060322	1.99442	1.15284e-07	2.06098e-06	zgc:153654	protein_coding
ENSDARG00000112234	1.99431	2.3607e-21	4.27466e-19	endouc	protein_coding
ENSDARG00000087492	1.99141	0.00606329	0.0231325	FO704810.1	protein_coding
ENSDARG00000036427	1.99135	1.10282e-05	0.000118837	slc3a2a	protein_coding
ENSDARG00000042793	1.99128	1.10128e-05	0.000118731	tpp1	protein_coding
ENSDARG00000093303	1.99029	0.00104821	0.00560873	ifitm1	protein_coding
ENSDARG00000071558	1.9881	4.50052e-05	0.0003993	fblim1	protein_coding
ENSDARG00000056532	1.98716	1.09507e-07	1.96505e-06	serinc2	protein_coding
ENSDARG00000070408	1.98627	4.32452e-08	8.55668e-07	ccnd2b	protein_coding
ENSDARG00000068457	1.98606	0.000378528	0.00241462	tnnt3b	protein_coding
ENSDARG00000092626	1.98366	9.95037e-10	2.72121e-08	zgc:174931	protein_coding
ENSDARG00000044094	1.98288	0.000280321	0.00187576	gfpt2	protein_coding
ENSDARG00000040080	1.9817	1.80498e-06	2.40752e-05	fli1b	protein_coding
ENSDARG00000035891	1.97821	0.00152001	0.0076326	acana	protein_coding
ENSDARG00000028275	1.97321	2.71851e-10	8.17331e-09	sult1st1	protein_coding
ENSDARG00000075725	1.97314	6.12289e-10	1.73605e-08	cep152	protein_coding
ENSDARG00000101374	1.97285	0.000106911	0.00083976	si:dkey-11n14.1	protein_coding
ENSDARG00000037598	1.97226	0.000649183	0.00379786	prf1.5	protein_coding
ENSDARG00000109370	1.96782	0.000186505	0.00133308	hist1h2ba	protein_coding
ENSDARG00000086576	1.96752	5.80319e-12	2.363e-10	si:cabz01069012.2	protein_coding
ENSDARG00000032043	1.96727	1.12003e-06	1.55736e-05	ftr96	protein_coding
ENSDARG00000055133	1.96682	8.24175e-10	2.28797e-08	cenpf	protein_coding
ENSDARG00000112019	1.96608	0.000465326	0.00286655	CABZ01065423.1	protein_coding
ENSDARG00000069989	1.96576	1.02903e-05	0.000112361	bnc2	protein_coding
ENSDARG00000002196	1.96536	2.2715e-09	5.73321e-08	bach1b	protein_coding
ENSDARG00000092162	1.96516	2.90509e-11	1.0585e-09	mhc1zaa	protein_coding
ENSDARG00000093960	1.96448	3.52161e-05	0.000324243	si:dkey-111e8.5	protein_coding
ENSDARG00000103735	1.96212	5.17027e-11	1.80146e-09	elovl1b	protein_coding
ENSDARG00000104404	1.96199	2.1256e-07	3.56534e-06	b4galt1l	protein_coding
ENSDARG00000044760	1.95626	1.27509e-08	2.7884e-07	gnaia	protein_coding
ENSDARG00000035120	1.95434	9.41853e-12	3.66051e-10	gldc	protein_coding
ENSDARG00000076557	1.95403	5.58638e-05	0.000481521	bicc2	protein_coding
ENSDARG00000031506	1.9532	1.36796e-06	1.86308e-05	flvcr2b	protein_coding
ENSDARG00000062129	1.95279	0.000108691	0.000851224	mxra8b	protein_coding
ENSDARG00000098191	1.95268	0.000495493	0.00301432	si:dkey-16l2.20	protein_coding
ENSDARG00000067847	1.94756	0.00707341	0.0261757	il21	protein_coding
ENSDARG00000078494	1.94671	0.00101137	0.00545313	adamts14	protein_coding
ENSDARG00000105033	1.94627	0.00542785	0.0210714	BX897691.1	protein_coding
ENSDARG00000015803	1.94573	0.00775046	0.0281495	smcr8b	protein_coding
ENSDARG00000036104	1.94375	7.9608e-18	8.57112e-16	MYO1G	protein_coding
ENSDARG00000053624	1.94065	4.15992e-05	0.000372678	csf1rb	protein_coding
ENSDARG00000111587	1.93792	0.000765471	0.00434385	CABZ01103860.1	protein_coding
ENSDARG00000112040	1.93466	0.00255888	0.0115794	CR774179.5	protein_coding
ENSDARG00000087740	1.9339	0.000131331	0.000994952	BX664618.1	processed_transcript
ENSDARG00000071694	1.93332	2.38169e-08	4.95018e-07	ndc80	protein_coding
ENSDARG00000055276	1.93164	6.43193e-17	6.0526e-15	rel	protein_coding
ENSDARG00000103229	1.9309	1.96747e-05	0.00019759	si:dkey-265e15.5	protein_coding
ENSDARG00000079889	1.92943	0.00011377	0.000884064	phldb2a	protein_coding
ENSDARG00000105384	1.92846	2.97615e-07	4.78063e-06	si:dkey-23a13.22	protein_coding
ENSDARG00000102972	1.92812	0.000255704	0.00173582	CABZ01075125.1	protein_coding
ENSDARG00000060127	1.92778	0.000127083	0.000969533	adamts3	protein_coding
ENSDARG00000098944	1.926	4.70627e-10	1.36682e-08	nme8	protein_coding
ENSDARG00000117385	1.92425	0.0051071	0.0201004	CABZ01031868.1	lincRNA
ENSDARG00000031954	1.92326	5.07627e-16	4.3179e-14	rbck1	protein_coding
ENSDARG00000088130	1.92202	1.22391e-06	1.68513e-05	si:dkey-30c15.10	protein_coding
ENSDARG00000074732	1.92135	0.000951155	0.00517988	BX682234.1	protein_coding
ENSDARG00000054827	1.91922	0.000408934	0.00257391	ssuh2.4	protein_coding
ENSDARG00000077009	1.91889	3.57108e-12	1.51072e-10	wdfy4	protein_coding
ENSDARG00000089701	1.91868	2.59258e-05	0.000249616	trabd2a	protein_coding
ENSDARG00000078888	1.91546	1.14735e-09	3.09525e-08	iqgap1	protein_coding
ENSDARG00000078249	1.91544	1.72077e-10	5.44743e-09	unc13d	protein_coding
ENSDARG00000011673	1.91319	0.00493256	0.0195422	si:ch211-246m6.5	protein_coding
ENSDARG00000063285	1.90885	1.12025e-05	0.000120397	ube2t	protein_coding
ENSDARG00000061579	1.9084	2.74125e-07	4.48777e-06	myo1cb	protein_coding
ENSDARG00000102221	1.90712	0.000244081	0.00166973	HACD4	protein_coding
ENSDARG00000040474	1.90682	6.65295e-05	0.000558549	snx10b	protein_coding
ENSDARG00000099514	1.90681	1.37611e-10	4.45084e-09	zgc:112234	protein_coding
ENSDARG00000017720	1.90677	1.178e-06	1.62944e-05	si:ch211-106h11.1	protein_coding
ENSDARG00000002002	1.90627	2.84618e-12	1.21917e-10	lmcd1	protein_coding
ENSDARG00000089223	1.90593	7.88296e-06	8.85009e-05	ngfrb	protein_coding
ENSDARG00000087393	1.90518	0.000126766	0.00096773	prr11	protein_coding
ENSDARG00000014017	1.90362	1.62868e-16	1.46901e-14	rrm1	protein_coding
ENSDARG00000074451	1.90212	4.05706e-11	1.44621e-09	mnd1	protein_coding
ENSDARG00000033757	1.90161	1.90367e-06	2.52226e-05	ncaph2	protein_coding
ENSDARG00000010255	1.90085	6.79683e-10	1.91127e-08	bin2b	protein_coding
ENSDARG00000087401	1.89717	0.000571332	0.0033987	slc25a34	protein_coding
ENSDARG00000016771	1.89706	0.0139087	0.0450714	tfa	protein_coding
ENSDARG00000078734	1.89686	4.52649e-09	1.08192e-07	myo1f	protein_coding
ENSDARG00000009484	1.89667	6.51633e-11	2.24105e-09	arf1	protein_coding
ENSDARG00000099438	1.89161	0.000427713	0.00266715	CABZ01073736.1	protein_coding
ENSDARG00000025147	1.89121	7.37269e-11	2.51387e-09	cd63	protein_coding
ENSDARG00000007715	1.89042	1.67624e-10	5.32077e-09	lgsn	protein_coding
ENSDARG00000092660	1.88791	0.0013424	0.00689134	cyp27c1	protein_coding
ENSDARG00000038123	1.88664	3.3358e-06	4.15272e-05	myl9a	protein_coding
ENSDARG00000078503	1.88592	4.013e-11	1.43376e-09	si:dkey-76b14.2	protein_coding
ENSDARG00000030465	1.88463	1.87198e-06	2.4844e-05	tmem263	protein_coding
ENSDARG00000037178	1.88415	6.51334e-05	0.000550307	zic2b	protein_coding
ENSDARG00000058533	1.88256	7.90289e-13	3.78547e-11	pole	protein_coding
ENSDARG00000076554	1.88111	8.3521e-06	9.32424e-05	cdkn1a	protein_coding
ENSDARG00000055566	1.87974	1.59506e-06	2.14186e-05	mastl	protein_coding
ENSDARG00000009942	1.87859	8.16493e-11	2.76428e-09	cdc6	protein_coding
ENSDARG00000008840	1.87797	4.9061e-07	7.47661e-06	hmbsa	protein_coding
ENSDARG00000005058	1.87603	2.0108e-09	5.12937e-08	ncapd2	protein_coding
ENSDARG00000043658	1.87562	5.09144e-09	1.20372e-07	cxadr	protein_coding
ENSDARG00000096541	1.87467	0.00984096	0.0341788	BX901942.1	antisense
ENSDARG00000040812	1.87112	5.94148e-10	1.68862e-08	ncf4	protein_coding
ENSDARG00000086337	1.8707	0.000380573	0.00242507	si:dkey-102g19.3	protein_coding
ENSDARG00000098153	1.87008	3.00846e-08	6.14074e-07	lhfpl2b	protein_coding
ENSDARG00000101479	1.86983	0.00284135	0.0125697	BX908782.2	protein_coding
ENSDARG00000043154	1.86706	1.25244e-06	1.72144e-05	ucp2	protein_coding
ENSDARG00000103067	1.86598	2.32412e-05	0.000227389	adgrd2	protein_coding
ENSDARG00000070155	1.86449	5.92188e-11	2.04544e-09	tuba8l3	protein_coding
ENSDARG00000070669	1.8644	2.97165e-13	1.52749e-11	cxcr3.3	protein_coding
ENSDARG00000058734	1.86376	7.61147e-09	1.73597e-07	prdx1	protein_coding
ENSDARG00000104043	1.86368	0.00235126	0.0108578	gng10	protein_coding
ENSDARG00000018569	1.86289	1.04974e-10	3.46558e-09	tnfrsf1a	protein_coding
ENSDARG00000013539	1.86139	1.19843e-06	1.65578e-05	ikzf1	protein_coding
ENSDARG00000069482	1.86139	4.54707e-05	0.000402981	traf1	protein_coding
ENSDARG00000102349	1.86026	0.000498617	0.0030287	cep55l	protein_coding
ENSDARG00000101689	1.85949	8.29077e-12	3.25396e-10	si:dkey-16p6.1	protein_coding
ENSDARG00000103984	1.85938	4.76261e-06	5.67195e-05	cyth4b	protein_coding
ENSDARG00000031776	1.85932	1.69847e-08	3.61702e-07	zgc:92066	protein_coding
ENSDARG00000110700	1.85746	3.44454e-07	5.45241e-06	COX7A2 (1 of many)	protein_coding
ENSDARG00000067831	1.85669	4.08821e-05	0.000367872	tbata	protein_coding
ENSDARG00000054304	1.85569	7.99367e-06	8.95756e-05	homeza	protein_coding
ENSDARG00000078014	1.85525	3.75431e-08	7.51553e-07	pacsin2	protein_coding
ENSDARG00000101707	1.85381	8.42031e-07	1.20951e-05	si:ch211-156b7.4	protein_coding
ENSDARG00000045853	1.85293	1.63615e-08	3.49797e-07	rad51ap1	protein_coding
ENSDARG00000097452	1.85202	0.000765263	0.0043437	CU929070.1	processed_transcript
ENSDARG00000082598	1.85107	0.00552112	0.0213779	dre-mir-135b	miRNA
ENSDARG00000031731	1.84998	0.00431656	0.0176095	si:ch73-27e22.6	protein_coding
ENSDARG00000087152	1.84846	4.20237e-06	5.08617e-05	sowahd	protein_coding
ENSDARG00000104408	1.84841	0.00045351	0.00280533	zgc:152774	protein_coding
ENSDARG00000101469	1.84841	0.00073273	0.00419792	si:dkey-19c16.12	protein_coding
ENSDARG00000091531	1.84771	0.00380058	0.0158899	carm1l	protein_coding
ENSDARG00000073711	1.84691	0.000272359	0.00183027	mmrn2b	protein_coding
ENSDARG00000002986	1.84637	0.000322747	0.00211177	gda	protein_coding
ENSDARG00000060023	1.84581	8.83518e-09	1.97716e-07	ncapg2	protein_coding
ENSDARG00000074201	1.84567	2.62633e-07	4.31441e-06	flna	protein_coding
ENSDARG00000098695	1.84542	9.01445e-07	1.28328e-05	vclb	protein_coding
ENSDARG00000036462	1.84521	0.00545892	0.0211679	rab11fip1b	protein_coding
ENSDARG00000080020	1.84424	8.71354e-13	4.13236e-11	il13ra1	protein_coding
ENSDARG00000100822	1.84382	0.00134178	0.00688964	mapk15	protein_coding
ENSDARG00000095719	1.84183	0.0156857	0.0496452	si:dkey-222h21.2	protein_coding
ENSDARG00000098237	1.83922	2.4022e-08	4.98415e-07	fbn2b	protein_coding
ENSDARG00000013794	1.8387	8.9147e-09	1.98953e-07	klf11b	protein_coding
ENSDARG00000068177	1.83788	5.57286e-10	1.59143e-08	pak2a	protein_coding
ENSDARG00000088612	1.83696	0.000411502	0.00258494	si:ch211-153b23.7	protein_coding
ENSDARG00000012073	1.83677	3.58178e-10	1.05824e-08	kif15	protein_coding
ENSDARG00000040503	1.83571	9.30378e-08	1.71061e-06	sb:cb81	protein_coding
ENSDARG00000117786	1.83565	1.20784e-06	1.66588e-05	CABZ01072848.1	lincRNA
ENSDARG00000096045	1.83368	0.00389034	0.0161883	si:ch73-263o4.4	protein_coding
ENSDARG00000019207	1.83334	0.0121037	0.0404392	abo	protein_coding
ENSDARG00000078970	1.83322	0.00607739	0.0231825	il7r	protein_coding
ENSDARG00000030608	1.83256	1.55063e-14	1.01543e-12	rhogd	protein_coding
ENSDARG00000058822	1.83239	0.000519573	0.00313607	wnt3a	protein_coding
ENSDARG00000103054	1.83224	7.26389e-07	1.06778e-05	dnm2b	protein_coding
ENSDARG00000068973	1.83069	1.04039e-06	1.45594e-05	pdlim4	protein_coding
ENSDARG00000077069	1.83056	5.04107e-08	9.82802e-07	srgn	protein_coding
ENSDARG00000098357	1.83055	0.0117229	0.0393928	si:ch211-229l10.4	protein_coding
ENSDARG00000083389	1.83011	0.000567095	0.00337874	RF00191	snoRNA
ENSDARG00000051768	1.82854	2.9447e-05	0.000278749	fhod1	protein_coding
ENSDARG00000055128	1.82823	7.79726e-08	1.46072e-06	armc4	protein_coding
ENSDARG00000007624	1.82656	8.69595e-05	0.000704101	gins1	protein_coding
ENSDARG00000015902	1.82609	4.21762e-17	4.13154e-15	stat6	protein_coding
ENSDARG00000075151	1.82598	7.92692e-07	1.15249e-05	si:dkey-188i13.10	protein_coding
ENSDARG00000060081	1.82584	1.49991e-07	2.60545e-06	crb2b	protein_coding
ENSDARG00000089088	1.82538	5.72556e-05	0.000491744	BX510940.1	processed_transcript
ENSDARG00000090844	1.82217	4.12439e-09	9.97786e-08	CABZ01054965.1	protein_coding
ENSDARG00000068749	1.82159	1.35983e-05	0.000142306	si:ch211-250k18.5	protein_coding
ENSDARG00000004105	1.82138	1.25758e-05	0.000133062	tie1	protein_coding
ENSDARG00000067549	1.82005	0.0046083	0.0185402	adamts12	protein_coding
ENSDARG00000008022	1.81905	2.30856e-07	3.85134e-06	kif18a	protein_coding
ENSDARG00000020711	1.81893	0.00238019	0.0109475	rrm2	protein_coding
ENSDARG00000042496	1.81608	1.70968e-12	7.60982e-11	parp12a	protein_coding
ENSDARG00000088402	1.81587	0.000188863	0.00134787	rubcnl	protein_coding
ENSDARG00000028295	1.8157	1.37957e-05	0.000144182	mkrn4	protein_coding
ENSDARG00000102475	1.81476	1.01227e-09	2.76202e-08	si:dkey-3p4.1	protein_coding
ENSDARG00000097470	1.81394	9.02822e-05	0.000725115	FP015862.2	processed_transcript
ENSDARG00000078152	1.81374	1.00331e-11	3.87418e-10	si:dkey-56i24.1	protein_coding
ENSDARG00000090401	1.81336	4.11826e-05	0.000369916	CABZ01020840.1	protein_coding
ENSDARG00000016674	1.81315	0.00197594	0.00944802	si:ch73-166o21.1	protein_coding
ENSDARG00000071261	1.81302	0.00377969	0.0158217	zmp:0000001139	protein_coding
ENSDARG00000002406	1.81286	0.00045703	0.00282315	zmynd10	protein_coding
ENSDARG00000059177	1.81185	2.69737e-06	3.43464e-05	tax1bp3	protein_coding
ENSDARG00000061916	1.81153	4.3965e-05	0.000391963	tmem51b	protein_coding
ENSDARG00000102366	1.81118	0.00058267	0.00345926	micall2a	protein_coding
ENSDARG00000020354	1.81112	0.00985859	0.0342201	lmx1a	protein_coding
ENSDARG00000032885	1.81063	1.46079e-05	0.000151601	si:ch211-226m7.4	protein_coding
ENSDARG00000029795	1.80918	5.74012e-08	1.10467e-06	fam213b	protein_coding
ENSDARG00000005679	1.80844	2.36444e-07	3.92737e-06	trip10a	protein_coding
ENSDARG00000038788	1.80835	0.000145165	0.00107991	dnai1.2	protein_coding
ENSDARG00000052063	1.80781	0.0025855	0.0116799	col4a5	protein_coding
ENSDARG00000096804	1.80737	0.00700475	0.0259819	si:dkey-219e21.4	protein_coding
ENSDARG00000069295	1.80667	1.44485e-15	1.11763e-13	bcl6ab	protein_coding
ENSDARG00000073756	1.80648	1.27516e-06	1.74664e-05	slc12a7a	protein_coding
ENSDARG00000113332	1.806	0.00017582	0.00126849	CABZ01084501.2	protein_coding
ENSDARG00000102211	1.80596	0.00729493	0.026821	csf3a	protein_coding
ENSDARG00000007425	1.80414	0.000717395	0.00412588	apol1	protein_coding
ENSDARG00000058100	1.80395	1.09091e-05	0.000117879	b3gnt3.4	protein_coding
ENSDARG00000037640	1.80253	8.63213e-07	1.23253e-05	aurkb	protein_coding
ENSDARG00000102375	1.7985	0.000205229	0.00144446	si:ch211-204c21.1	protein_coding
ENSDARG00000101209	1.79411	4.06436e-06	4.94635e-05	lamb1a	protein_coding
ENSDARG00000019845	1.79406	1.06297e-05	0.000115382	pdlim1	protein_coding
ENSDARG00000096587	1.79311	9.38525e-06	0.000103186	itgam	protein_coding
ENSDARG00000090552	1.79172	8.63446e-15	5.96476e-13	si:dkey-7j14.6	protein_coding
ENSDARG00000074927	1.79085	8.19587e-07	1.18296e-05	bub1bb	protein_coding
ENSDARG00000089868	1.79031	0.00372425	0.0156417	si:ch211-112c15.8	protein_coding
ENSDARG00000093936	1.79008	0.0112531	0.0381087	si:dkeyp-1h4.6	protein_coding
ENSDARG00000056233	1.7885	5.56744e-07	8.37463e-06	zgc:110591	protein_coding
ENSDARG00000030999	1.78808	1.32523e-08	2.88484e-07	mybl1	protein_coding
ENSDARG00000102985	1.7877	8.29491e-07	1.19437e-05	BX537303.1	processed_transcript
ENSDARG00000062929	1.78666	1.96641e-08	4.15204e-07	FAM83G	protein_coding
ENSDARG00000036791	1.78463	1.81979e-10	5.70821e-09	dnmt3bb.1	protein_coding
ENSDARG00000074094	1.78341	0.00205621	0.00975926	tgm2b	protein_coding
ENSDARG00000074262	1.78279	1.1674e-11	4.4645e-10	nck1a	protein_coding
ENSDARG00000088332	1.78141	0.00771052	0.0280513	alx4a	protein_coding
ENSDARG00000099690	1.7805	2.9521e-07	4.75052e-06	vaspa	protein_coding
ENSDARG00000068199	1.77987	0.000171851	0.00124586	pld3	protein_coding
ENSDARG00000010572	1.77908	2.01495e-05	0.000201765	slc25a25a	protein_coding
ENSDARG00000009401	1.77887	0.000124767	0.000954606	vcanb	protein_coding
ENSDARG00000070494	1.77842	0.000235443	0.00161944	pdgfra	protein_coding
ENSDARG00000110178	1.77785	0.000567128	0.00337874	CABZ01066694.1	protein_coding
ENSDARG00000089162	1.77779	0.000782882	0.00442689	afap1l1a	protein_coding
ENSDARG00000076484	1.77463	4.08128e-05	0.000367423	stab1	protein_coding
ENSDARG00000040224	1.77109	3.82507e-12	1.60963e-10	krcp	protein_coding
ENSDARG00000041723	1.77105	2.88093e-06	3.64759e-05	zgc:55461	protein_coding
ENSDARG00000097530	1.77012	5.86736e-07	8.78707e-06	xkr5b	protein_coding
ENSDARG00000086126	1.76977	0.000914149	0.00502068	trim33l	protein_coding
ENSDARG00000077285	1.76924	0.00010321	0.000814972	scarf1	protein_coding
ENSDARG00000045989	1.76923	7.69486e-11	2.61998e-09	arf4a	protein_coding
ENSDARG00000105376	1.76858	4.54931e-08	8.95697e-07	HIST1H4D	protein_coding
ENSDARG00000114159	1.76752	0.00184276	0.00891976	TMEM196	protein_coding
ENSDARG00000055120	1.76693	6.71044e-06	7.64891e-05	ctsba	protein_coding
ENSDARG00000105239	1.7669	3.4365e-05	0.000317876	ecm1b	protein_coding
ENSDARG00000104693	1.76687	6.19191e-17	5.91996e-15	il6st	protein_coding
ENSDARG00000100357	1.76559	1.01349e-11	3.90715e-10	si:ch73-44m9.3	protein_coding
ENSDARG00000077176	1.76455	3.37072e-31	2.23797e-28	zgc:174888	protein_coding
ENSDARG00000056619	1.76278	5.19883e-08	1.00781e-06	arhgap42a	protein_coding
ENSDARG00000022309	1.76274	3.77468e-06	4.63392e-05	dspa	protein_coding
ENSDARG00000028088	1.76129	3.85187e-08	7.69794e-07	galk1	protein_coding
ENSDARG00000068934	1.76101	0.00313209	0.0136065	cyp1b1	protein_coding
ENSDARG00000008238	1.76101	6.3087e-05	0.000534908	manba	protein_coding
ENSDARG00000099546	1.76045	0.0052319	0.0204703	kynu	protein_coding
ENSDARG00000097428	1.75951	0.00615414	0.0234043	BX470242.2	antisense
ENSDARG00000105575	1.75927	0.000109542	0.000857045	si:dkey-6n21.12	protein_coding
ENSDARG00000024602	1.75804	9.17166e-05	0.000735641	zgc:162964	protein_coding
ENSDARG00000038205	1.75658	1.10325e-05	0.000118837	her2	protein_coding
ENSDARG00000043475	1.75392	1.12447e-10	3.68683e-09	tagapb	protein_coding
ENSDARG00000070272	1.7538	4.73044e-06	5.63644e-05	casp8l2	protein_coding
ENSDARG00000053159	1.75376	7.86149e-07	1.14437e-05	zgc:110626	protein_coding
ENSDARG00000077810	1.75009	3.18165e-09	7.79978e-08	otud4	protein_coding
ENSDARG00000104484	1.74938	5.77262e-09	1.35405e-07	itgb1b	protein_coding
ENSDARG00000068096	1.74919	1.33789e-31	9.13661e-29	atf5a	protein_coding
ENSDARG00000101794	1.7461	5.14061e-06	6.06769e-05	atp6v0e1	protein_coding
ENSDARG00000097082	1.74521	4.20594e-05	0.000376518	im:7152348	protein_coding
ENSDARG00000098177	1.74512	8.36434e-06	9.32989e-05	si:dkey-28i19.3	protein_coding
ENSDARG00000040815	1.74484	0.000294634	0.00195947	tsku	protein_coding
ENSDARG00000030759	1.74343	3.97059e-07	6.1747e-06	melk	protein_coding
ENSDARG00000099318	1.74107	0.0051595	0.0202633	CABZ01062422.1	protein_coding
ENSDARG00000117551	1.74002	4.32912e-08	8.55869e-07	BX005005.1	lincRNA
ENSDARG00000090153	1.73874	5.6818e-12	2.32148e-10	cyldl	protein_coding
ENSDARG00000024904	1.7377	1.3297e-05	0.000139519	stil	protein_coding
ENSDARG00000039082	1.73755	1.434e-08	3.10747e-07	zgc:123010	protein_coding
ENSDARG00000060845	1.73712	0.00377851	0.0158196	antxr1d	protein_coding
ENSDARG00000067718	1.73658	5.97887e-07	8.94846e-06	si:dkey-3h3.3	protein_coding
ENSDARG00000103052	1.73627	2.05867e-09	5.23471e-08	pcyox1	protein_coding
ENSDARG00000099276	1.7313	0.00254546	0.0115252	ugt5b3	protein_coding
ENSDARG00000104691	1.73044	0.0121585	0.0405713	cd79b	protein_coding
ENSDARG00000045294	1.73025	4.39956e-08	8.68998e-07	sh3glb1a	protein_coding
ENSDARG00000062817	1.72893	0.000151099	0.00111606	crym	protein_coding
ENSDARG00000018623	1.72731	4.10586e-05	0.000368941	rad54l	protein_coding
ENSDARG00000075700	1.72634	0.000288041	0.00191839	zswim2	protein_coding
ENSDARG00000038553	1.72587	0.000276443	0.00185471	BX890608.1	processed_pseudogene
ENSDARG00000092285	1.72505	0.00228097	0.0105987	cenpv	protein_coding
ENSDARG00000041792	1.72423	0.00329078	0.0141617	cx28.1	protein_coding
ENSDARG00000070021	1.72346	0.00325197	0.0140228	cyp3c4	protein_coding
ENSDARG00000058365	1.7223	0.00103913	0.00556638	hspb8	protein_coding
ENSDARG00000099741	1.72185	3.59814e-05	0.000330399	mvb12a	protein_coding
ENSDARG00000101292	1.72014	0.00992636	0.0344154	si:dkey-201g16.1	protein_coding
ENSDARG00000078979	1.7199	4.47424e-13	2.242e-11	arhgef40	protein_coding
ENSDARG00000061375	1.71956	4.78778e-05	0.000421944	sgpl1	protein_coding
ENSDARG00000097680	1.71935	2.93714e-05	0.000278144	si:ch211-241f5.3	protein_coding
ENSDARG00000058260	1.71702	1.60113e-08	3.43231e-07	cip2a	protein_coding
ENSDARG00000042470	1.71688	0.00111474	0.00590595	s1pr3a	protein_coding
ENSDARG00000078729	1.71628	2.97661e-09	7.3423e-08	ackr4a	protein_coding
ENSDARG00000057598	1.71538	1.62434e-07	2.79921e-06	s100b	protein_coding
ENSDARG00000016154	1.71531	1.76467e-15	1.3519e-13	zfp36l1a	protein_coding
ENSDARG00000018688	1.71457	1.34484e-07	2.36182e-06	elk3	protein_coding
ENSDARG00000101249	1.71368	7.77848e-13	3.73336e-11	CU459186.3	protein_coding
ENSDARG00000054155	1.71301	3.46311e-11	1.25038e-09	pcna	protein_coding
ENSDARG00000076594	1.71193	0.000113595	0.000883549	pcdh12	protein_coding
ENSDARG00000015263	1.71181	0.000739124	0.00422241	adma	protein_coding
ENSDARG00000097313	1.70971	0.00658728	0.0247445	CR812470.2	lincRNA
ENSDARG00000032496	1.70683	1.33856e-06	1.82616e-05	pon1	protein_coding
ENSDARG00000045626	1.70621	2.45946e-06	3.17247e-05	nek8	protein_coding
ENSDARG00000004932	1.70549	1.64422e-05	0.00016821	anos1b	protein_coding
ENSDARG00000088816	1.70479	0.00320148	0.0138451	trabd2b	protein_coding
ENSDARG00000092500	1.70475	0.00619984	0.0235519	si:dkey-222h21.1	protein_coding
ENSDARG00000008026	1.70356	0.000284864	0.00190297	fam129bb	protein_coding
ENSDARG00000098761	1.70225	1.01024e-10	3.34905e-09	rgs2	protein_coding
ENSDARG00000054302	1.70209	1.36056e-11	5.17011e-10	ehd4	protein_coding
ENSDARG00000071082	1.70188	4.28905e-07	6.62449e-06	p4ha1b	protein_coding
ENSDARG00000040944	1.70117	0.000315027	0.0020726	ntd5	protein_coding
ENSDARG00000071410	1.70076	0.000486131	0.00297118	cks2	protein_coding
ENSDARG00000089837	1.69799	4.65895e-08	9.15775e-07	slc35d2	protein_coding
ENSDARG00000104501	1.6956	8.9678e-06	9.92354e-05	FP236812.1	protein_coding
ENSDARG00000090192	1.69498	1.1815e-05	0.000126072	si:dkey-191j3.2	protein_coding
ENSDARG00000015070	1.69361	4.48175e-09	1.0723e-07	pola2	protein_coding
ENSDARG00000101495	1.6934	8.30322e-06	9.274e-05	ugt5b2	protein_coding
ENSDARG00000024818	1.69304	1.56535e-07	2.71124e-06	rilpl2	protein_coding
ENSDARG00000112386	1.69076	0.00464529	0.0186545	si:ch73-236c18.2	protein_coding
ENSDARG00000104255	1.69009	7.58765e-16	6.27544e-14	arhgap27	protein_coding
ENSDARG00000025641	1.6899	6.22361e-11	2.14347e-09	gli2a	protein_coding
ENSDARG00000099684	1.6895	0.00661797	0.0248441	trim35-24	protein_coding
ENSDARG00000058537	1.68508	2.0854e-05	0.000207948	si:dkey-102c8.2	protein_coding
ENSDARG00000010145	1.68503	1.25771e-06	1.72577e-05	tor4aa	protein_coding
ENSDARG00000043710	1.68411	3.9327e-07	6.12772e-06	parvaa	protein_coding
ENSDARG00000099541	1.68383	0.00635235	0.0240167	CABZ01086734.1	protein_coding
ENSDARG00000007278	1.6833	3.20695e-06	4.00692e-05	ect2	protein_coding
ENSDARG00000062023	1.67909	2.64523e-12	1.14127e-10	fndc3bb	protein_coding
ENSDARG00000076566	1.67755	2.07415e-06	2.71949e-05	kank3	protein_coding
ENSDARG00000103545	1.67611	0.011185	0.0379533	tctex1d1	protein_coding
ENSDARG00000071586	1.67502	0.00622022	0.0236045	tgfbi	protein_coding
ENSDARG00000016048	1.67501	5.28876e-05	0.000459012	gpat3	protein_coding
ENSDARG00000079049	1.67423	0.000100405	0.000796771	cercam	protein_coding
ENSDARG00000009079	1.67287	0.000251074	0.00171023	BX296551.1	processed_transcript
ENSDARG00000093412	1.67158	6.4949e-07	9.6483e-06	sertad2a	protein_coding
ENSDARG00000068629	1.67152	7.48572e-07	1.09461e-05	cd151l	protein_coding
ENSDARG00000095448	1.67058	0.0103432	0.0355565	ftr30	protein_coding
ENSDARG00000037528	1.6644	0.0125896	0.0416436	si:ch211-191a24.4	protein_coding
ENSDARG00000006775	1.66338	1.8911e-06	2.50699e-05	cass4	protein_coding
ENSDARG00000103727	1.66316	0.00400429	0.0165876	tfr2	protein_coding
ENSDARG00000054447	1.66119	0.0070355	0.0260758	slc29a1b	protein_coding
ENSDARG00000053744	1.65836	1.38788e-05	0.000144861	dcdc2b	protein_coding
ENSDARG00000056888	1.6576	2.59308e-05	0.000249616	dnah5l	protein_coding
ENSDARG00000104380	1.65753	0.000309055	0.00204174	si:dkey-238k10.2	protein_coding
ENSDARG00000044074	1.65736	6.10102e-07	9.11416e-06	loxl2b	protein_coding
ENSDARG00000074071	1.65712	0.00765853	0.0278961	mrnip	protein_coding
ENSDARG00000103854	1.65632	0.000488962	0.00298523	pdlim7	protein_coding
ENSDARG00000030938	1.65572	5.77928e-08	1.11131e-06	fermt3b	protein_coding
ENSDARG00000101441	1.65487	8.88276e-08	1.64204e-06	lima1a	protein_coding
ENSDARG00000074326	1.65263	1.57771e-05	0.000162335	mcm8	protein_coding
ENSDARG00000013274	1.6511	5.82606e-05	0.000498941	eif4eb	protein_coding
ENSDARG00000109929	1.64931	4.51015e-08	8.8872e-07	CABZ01058721.1	protein_coding
ENSDARG00000051975	1.64888	1.37843e-06	1.87327e-05	cd99	protein_coding
ENSDARG00000016730	1.6484	0.000168936	0.00122733	rfxank	protein_coding
ENSDARG00000022832	1.64801	2.15291e-05	0.0002137	bnip4	protein_coding
ENSDARG00000102300	1.64777	0.000831845	0.00465202	ca9	protein_coding
ENSDARG00000094695	1.64672	2.3684e-11	8.69576e-10	si:dkey-204f11.64	protein_coding
ENSDARG00000091834	1.64594	2.47501e-05	0.000240185	si:ch211-198m17.1	protein_coding
ENSDARG00000089390	1.64493	9.63005e-06	0.000105709	pnpla2	protein_coding
ENSDARG00000058348	1.64445	9.96982e-10	2.72341e-08	scinlb	protein_coding
ENSDARG00000011072	1.64432	2.16099e-07	3.62215e-06	ddx11	protein_coding
ENSDARG00000014348	1.64407	2.01357e-09	5.13095e-08	stk17b	protein_coding
ENSDARG00000099112	1.64312	1.70771e-09	4.4175e-08	si:dkey-71l4.3	protein_coding
ENSDARG00000008540	1.64129	1.99882e-16	1.78267e-14	sox21b	protein_coding
ENSDARG00000105352	1.64111	1.02358e-12	4.78779e-11	CU459186.6	protein_coding
ENSDARG00000093381	1.63976	0.000277103	0.00185787	tgm2l	protein_coding
ENSDARG00000021149	1.63875	2.17738e-08	4.55327e-07	cbr1l	protein_coding
ENSDARG00000042688	1.63655	6.87659e-05	0.000574499	bora	protein_coding
ENSDARG00000036107	1.6359	0.00136361	0.0069822	txnipa	protein_coding
ENSDARG00000058370	1.63185	0.00204718	0.00972219	ropn1l	protein_coding
ENSDARG00000113301	1.63139	6.64846e-05	0.000558368	LO018260.3	protein_coding
ENSDARG00000057273	1.63128	1.08743e-05	0.00011761	alox5a	protein_coding
ENSDARG00000079530	1.62806	4.23876e-08	8.40089e-07	si:dkey-17m8.1	protein_coding
ENSDARG00000094484	1.62721	0.00520877	0.0204024	si:ch211-162i8.4	protein_coding
ENSDARG00000102701	1.62476	5.85913e-05	0.000501235	eva1ba	protein_coding
ENSDARG00000002937	1.62437	0.00929162	0.0326697	meis1a	protein_coding
ENSDARG00000092166	1.6229	3.01844e-08	6.15163e-07	si:dkey-147f3.8	protein_coding
ENSDARG00000017676	1.62266	3.76549e-07	5.9057e-06	mmp2	protein_coding
ENSDARG00000054968	1.62204	1.19282e-15	9.5036e-14	cd40	protein_coding
ENSDARG00000077918	1.62154	0.000104377	0.000821743	dnase2b	protein_coding
ENSDARG00000093773	1.62086	0.00853617	0.0305299	si:ch1073-296i8.2	protein_coding
ENSDARG00000008592	1.62014	0.000101744	0.000805263	mtmr8	protein_coding
ENSDARG00000038186	1.61983	0.000738508	0.0042209	zgc:103564	protein_coding
ENSDARG00000040036	1.61945	5.81081e-07	8.71138e-06	tcf19l	protein_coding
ENSDARG00000016161	1.61912	0.00378689	0.0158469	ccdc170	protein_coding
ENSDARG00000114405	1.61799	5.64583e-05	0.000486119	zgc:194989	protein_coding
ENSDARG00000010556	1.61745	0.00439067	0.0178388	mmp25b	protein_coding
ENSDARG00000079997	1.6171	0.0112239	0.0380459	si:zfos-223e1.2	protein_coding
ENSDARG00000104120	1.61704	0.00115308	0.00606936	LO018260.1	protein_coding
ENSDARG00000057884	1.61696	1.55958e-05	0.000160747	zgc:114174	protein_coding
ENSDARG00000002701	1.61689	1.34079e-05	0.000140436	rasl12	protein_coding
ENSDARG00000057166	1.6157	6.60688e-05	0.000556636	lrmda	protein_coding
ENSDARG00000103179	1.61463	0.00163391	0.0080957	CU639397.1	lincRNA
ENSDARG00000100088	1.61394	0.00337481	0.0144664	zmp:0000001114	protein_coding
ENSDARG00000093532	1.61093	0.00241933	0.0110793	si:dkey-230i18.2	protein_coding
ENSDARG00000069961	1.61071	0.00225601	0.0104991	il21r.1	protein_coding
ENSDARG00000079584	1.61032	0.00140517	0.00715307	zgc:194930	protein_coding
ENSDARG00000059956	1.61015	4.67383e-05	0.000412533	ptk6b	protein_coding
ENSDARG00000069302	1.60991	1.23316e-05	0.000130942	snx9b	protein_coding
ENSDARG00000044808	1.60986	2.19688e-05	0.000216908	slc4a4b	protein_coding
ENSDARG00000037238	1.60971	6.96566e-09	1.60553e-07	smad5	protein_coding
ENSDARG00000004874	1.60969	0.00207741	0.00984422	spata6l	protein_coding
ENSDARG00000068855	1.60774	0.00128302	0.00663497	si:ch211-163l21.10	protein_coding
ENSDARG00000012030	1.6076	0.00868309	0.0309351	dnaaf1	protein_coding
ENSDARG00000102249	1.6073	1.57769e-05	0.000162335	pepd	protein_coding
ENSDARG00000010792	1.60693	4.12285e-12	1.72582e-10	cdc25b	protein_coding
ENSDARG00000077410	1.60648	7.90538e-09	1.79104e-07	myo9b	protein_coding
ENSDARG00000071196	1.60631	7.69521e-05	0.000633808	cavin2b	protein_coding
ENSDARG00000079766	1.6055	2.04344e-13	1.0878e-11	tap1	protein_coding
ENSDARG00000016427	1.60518	8.805e-06	9.77478e-05	fignl1	protein_coding
ENSDARG00000111625	1.60387	2.94717e-05	0.000278763	wu:fc75a09	protein_coding
ENSDARG00000096331	1.60274	0.00521367	0.0204156	si:ch73-248e21.7	protein_coding
ENSDARG00000037891	1.60129	7.87496e-09	1.78584e-07	mlx	protein_coding
ENSDARG00000043705	1.60068	0.00535928	0.0208568	mob3c	protein_coding
ENSDARG00000069815	1.60024	0.00235229	0.0108583	dnali1	protein_coding
ENSDARG00000031136	1.6	0.00714081	0.0263476	moxd1	protein_coding
ENSDARG00000086457	1.59896	1.90292e-08	4.03939e-07	tnfaip8l1	protein_coding
ENSDARG00000046030	1.59823	7.34855e-10	2.05914e-08	zgc:110339	protein_coding
ENSDARG00000069846	1.59526	3.4233e-13	1.74464e-11	zgc:162944	protein_coding
ENSDARG00000113804	1.59511	0.00107381	0.00572521	si:dkey-205i10.1	protein_coding
ENSDARG00000116197	1.594	2.63416e-06	3.36874e-05	si:dkeyp-4c4.2	protein_coding
ENSDARG00000075707	1.59292	1.8517e-05	0.000187778	nid2a	protein_coding
ENSDARG00000076487	1.59028	4.68652e-11	1.64731e-09	haao	protein_coding
ENSDARG00000093761	1.59007	2.4713e-06	3.18432e-05	si:ch211-250k18.7	protein_coding
ENSDARG00000110069	1.58934	0.00273189	0.0122052	pdgfaa	protein_coding
ENSDARG00000011876	1.58924	0.000887363	0.00490399	ednraa	protein_coding
ENSDARG00000056757	1.58896	0.00490638	0.0194634	slc39a8	protein_coding
ENSDARG00000027087	1.58884	1.02823e-06	1.444e-05	tgfb2	protein_coding
ENSDARG00000031749	1.58809	0.000972204	0.00527888	CU861476.1	protein_coding
ENSDARG00000029036	1.58808	0.000130368	0.000989224	rab32a	protein_coding
ENSDARG00000062355	1.58717	0.00117887	0.00617923	axdnd1	protein_coding
ENSDARG00000079327	1.58641	7.56327e-07	1.105e-05	hmcn2	protein_coding
ENSDARG00000008287	1.58529	2.87647e-05	0.000273809	fam114a1	protein_coding
ENSDARG00000087844	1.58409	0.00255299	0.0115571	plekhn1	protein_coding
ENSDARG00000068453	1.58401	0.000123928	0.000949095	CABZ01112732.1	protein_coding
ENSDARG00000100513	1.58364	6.46665e-06	7.40613e-05	rps27l	protein_coding
ENSDARG00000103615	1.58208	2.54127e-05	0.000245222	si:dkey-31j3.11	protein_coding
ENSDARG00000059672	1.57861	0.00024237	0.00165992	arhgap36	protein_coding
ENSDARG00000057100	1.57828	2.01753e-06	2.64962e-05	zwilch	protein_coding
ENSDARG00000105382	1.57719	7.30142e-05	0.000605547	CU457819.5	protein_coding
ENSDARG00000027589	1.57608	0.000132342	0.00100071	fzd7b	protein_coding
ENSDARG00000104474	1.5746	8.32793e-08	1.54697e-06	il6r	protein_coding
ENSDARG00000097137	1.56918	8.4057e-07	1.20814e-05	CR753876.1	lincRNA
ENSDARG00000069453	1.56915	0.000496583	0.00301865	zgc:113314	protein_coding
ENSDARG00000009939	1.56909	7.11507e-05	0.000592353	micu2	protein_coding
ENSDARG00000088377	1.56902	0.0157495	0.0497642	rp1l1b	protein_coding
ENSDARG00000071555	1.56873	0.000713277	0.00410615	zgc:153675	protein_coding
ENSDARG00000044437	1.56865	5.70996e-08	1.10064e-06	cdca5	protein_coding
ENSDARG00000028389	1.56842	1.48334e-05	0.000153817	rab44	protein_coding
ENSDARG00000037997	1.56594	5.59916e-15	4.03106e-13	tubb5	protein_coding
ENSDARG00000067741	1.56557	5.10082e-05	0.000444962	itpkcb	protein_coding
ENSDARG00000069708	1.56547	3.67156e-06	4.5236e-05	cdc34a	protein_coding
ENSDARG00000053455	1.56499	1.48691e-07	2.58851e-06	ccdc103	protein_coding
ENSDARG00000104011	1.56358	7.37306e-09	1.69127e-07	rps17	protein_coding
ENSDARG00000036875	1.56324	3.98566e-09	9.66144e-08	rps12	protein_coding
ENSDARG00000074850	1.56183	2.74165e-06	3.48383e-05	il12rb2l	protein_coding
ENSDARG00000071871	1.5609	0.000271473	0.00182627	glod5	protein_coding
ENSDARG00000040255	1.56062	1.45476e-11	5.49315e-10	ephx2	protein_coding
ENSDARG00000091465	1.55907	0.00345704	0.014737	si:dkey-66a8.7	protein_coding
ENSDARG00000100199	1.55744	0.00228995	0.010631	si:ch1073-185p12.2	protein_coding
ENSDARG00000090623	1.55685	0.00427224	0.0174765	si:dkeyp-106c3.1	protein_coding
ENSDARG00000113977	1.55437	0.00583409	0.0224082	zgc:194125	protein_coding
ENSDARG00000022466	1.55405	6.65706e-08	1.26686e-06	clcn5b	protein_coding
ENSDARG00000115832	1.55364	1.98175e-06	2.61412e-05	LO018490.1	protein_coding
ENSDARG00000098986	1.55353	0.00176999	0.00864981	znf1040	protein_coding
ENSDARG00000055889	1.5532	1.01613e-07	1.84556e-06	zgc:153215	protein_coding
ENSDARG00000063292	1.55205	3.7495e-06	4.60774e-05	ssuh2rs1	protein_coding
ENSDARG00000055232	1.55188	2.47225e-05	0.000240015	fancc	protein_coding
ENSDARG00000038612	1.55039	0.000166403	0.00121261	pih1d3	protein_coding
ENSDARG00000043130	1.55008	9.78768e-08	1.78634e-06	notch2	protein_coding
ENSDARG00000088423	1.55003	3.49737e-05	0.000322384	si:ch211-66k16.28	protein_coding
ENSDARG00000030975	1.54978	0.00422451	0.0173168	ccdc80l1	protein_coding
ENSDARG00000011262	1.54919	1.43003e-06	1.93658e-05	traip	protein_coding
ENSDARG00000114473	1.54876	9.84146e-07	1.39025e-05	CABZ01085710.1	protein_coding
ENSDARG00000035018	1.54804	4.73397e-05	0.000417533	thy1	protein_coding
ENSDARG00000089129	1.5472	1.25074e-05	0.000132397	baxa	protein_coding
ENSDARG00000078523	1.547	1.1301e-06	1.56953e-05	ddr1	protein_coding
ENSDARG00000004378	1.5465	3.70421e-06	4.56147e-05	yrk	protein_coding
ENSDARG00000024546	1.54595	4.41134e-05	0.000393139	pla2g4aa	protein_coding
ENSDARG00000089852	1.54456	9.48813e-05	0.000757719	si:dkey-51d8.1	protein_coding
ENSDARG00000102470	1.54446	1.56052e-05	0.000160774	mpp7a	protein_coding
ENSDARG00000075714	1.54446	0.00535665	0.0208526	si:dkey-27p23.3	protein_coding
ENSDARG00000005619	1.54436	1.09594e-05	0.000118263	nek2	protein_coding
ENSDARG00000056062	1.5441	0.0101487	0.0350338	adgre14	protein_coding
ENSDARG00000012450	1.54388	4.43543e-12	1.84375e-10	vmp1	protein_coding
ENSDARG00000105009	1.54217	3.04658e-11	1.10836e-09	ddah2	protein_coding
ENSDARG00000116221	1.54213	0.00181115	0.00880388	LO018205.2	protein_coding
ENSDARG00000059123	1.54103	0.00185397	0.0089649	plcd1a	protein_coding
ENSDARG00000004473	1.54075	0.00319199	0.0138065	tbx21	protein_coding
ENSDARG00000076564	1.54043	2.71021e-05	0.000260159	hspg2	protein_coding
ENSDARG00000069168	1.53791	2.48805e-10	7.55646e-09	si:dkey-73n10.1	protein_coding
ENSDARG00000056203	1.5362	5.82088e-05	0.000498677	si:ch211-201h21.5	protein_coding
ENSDARG00000089922	1.53561	2.13855e-06	2.79932e-05	dsn1	protein_coding
ENSDARG00000101629	1.5353	1.38273e-07	2.41947e-06	CABZ01079192.1	protein_coding
ENSDARG00000117255	1.53411	0.0141331	0.0456376	CABZ01066578.1	lincRNA
ENSDARG00000060312	1.5335	8.02457e-10	2.23027e-08	wdr62	protein_coding
ENSDARG00000059507	1.5332	0.000368718	0.00236023	si:dkey-163m14.2	protein_coding
ENSDARG00000059906	1.5322	1.01847e-06	1.43281e-05	sdc4	protein_coding
ENSDARG00000005593	1.53066	0.000181158	0.00130031	rxrga	processed_transcript
ENSDARG00000092870	1.53044	1.21906e-09	3.26005e-08	BX936337.1	lincRNA
ENSDARG00000092584	1.52649	0.00105836	0.00565043	si:ch1073-385f13.3	protein_coding
[truncated: 2,663 more rows]

## Sheet: SIG_14dpl_2
ZebrafishGeneID	log2FoldChange	pvalue	padj	ZebrafishGeneName	gene_biotype
ENSDARG00000100614	25.0236	4.68648e-15	5.32776e-13	zgc:171497	protein_coding
ENSDARG00000071643	10.6397	0.000271965	0.00265437	zgc:171490	protein_coding
ENSDARG00000071644	9.42399	1.34302e-07	3.74065e-06	si:dkey-19a16.7	protein_coding
ENSDARG00000116524	9.07927	3.93315e-12	2.82704e-10	zgc:103700	protein_coding
ENSDARG00000098214	7.8814	0.00167267	0.0118923	CABZ01072487.1	protein_coding
ENSDARG00000090167	7.72518	0.00437462	0.0256177	FO904898.1	protein_coding
ENSDARG00000100000	7.30728	2.4444e-09	1.03943e-07	CR352226.5	lincRNA
ENSDARG00000116618	6.96575	0.00422411	0.0249131	si:ch73-27e22.8	protein_coding
ENSDARG00000090869	6.89704	0.00358382	0.0217944	FO904898.4	protein_coding
ENSDARG00000103716	6.78914	0.000320108	0.00305205	si:busm1-194e12.11	protein_coding
ENSDARG00000062537	6.69342	0.00429371	0.0252035	GNG14	protein_coding
ENSDARG00000021032	6.64392	1.99355e-09	8.67173e-08	foxd3	protein_coding
ENSDARG00000098110	6.54594	0.00165361	0.0117982	CABZ01079550.1	protein_coding
ENSDARG00000071590	6.10994	7.04974e-05	0.000851395	si:ch211-236g6.1	protein_coding
ENSDARG00000077415	5.702	3.01066e-07	7.55445e-06	zmp:0000001175	protein_coding
ENSDARG00000104015	5.61292	0.000335378	0.00317996	fgfr1bl	protein_coding
ENSDARG00000034588	5.55816	2.33046e-11	1.48789e-09	scn4ab	protein_coding
ENSDARG00000074085	5.35442	0.00668478	0.0355496	si:ch1073-188e1.1	protein_coding
ENSDARG00000087017	5.15072	0.0015397	0.011128	PTGR1 (1 of many)	protein_coding
ENSDARG00000104635	5.08102	3.04378e-08	9.92995e-07	mhc2b	protein_coding
ENSDARG00000093402	5.0097	1.03185e-08	3.78154e-07	si:dkey-286j17.4	protein_coding
ENSDARG00000117508	4.96899	2.37125e-05	0.000341761	CU459056.2	lincRNA
ENSDARG00000079986	4.83287	3.06768e-09	1.27526e-07	BX927329.1	unprocessed_pseudogene
ENSDARG00000075248	4.37688	9.07619e-06	0.000152286	zgc:172133	protein_coding
ENSDARG00000117571	3.85873	0.000259928	0.0025627	BX927329.2	lincRNA
ENSDARG00000092191	3.84944	2.64579e-07	6.78405e-06	CR318588.1	processed_transcript
ENSDARG00000078389	3.80851	2.94056e-08	9.63553e-07	si:dkey-188i13.7	protein_coding
ENSDARG00000100904	3.76683	3.04803e-09	1.26946e-07	CABZ01109021.1	protein_coding
ENSDARG00000061714	3.60979	0.00316095	0.0197042	si:dkey-45k15.1	protein_coding
ENSDARG00000070280	3.60458	0.000147891	0.00158963	hist1h2a3	protein_coding
ENSDARG00000094719	3.5435	0.00307175	0.0192693	CR318588.3	processed_transcript
ENSDARG00000015273	3.50228	0.00207048	0.0140739	alpi.1	protein_coding
ENSDARG00000058180	3.49804	0.00144021	0.0105538	exoc3l4	protein_coding
ENSDARG00000018846	3.4646	0.000594603	0.00507623	dgat2	protein_coding
ENSDARG00000022614	3.46258	0.000651646	0.00549167	ddx43	protein_coding
ENSDARG00000077571	3.45723	0.000209396	0.00213634	zgc:174862	protein_coding
ENSDARG00000057173	3.39891	0.0057963	0.0319844	ifit8	protein_coding
ENSDARG00000070289	3.30757	0.00503766	0.0287082	si:ch211-113a14.22	protein_coding
ENSDARG00000109648	3.28476	0.00533363	0.0300263	si:ch211-147m6.1	protein_coding
ENSDARG00000117654	3.24637	0.00129733	0.00967588	BX545917.6	lincRNA
ENSDARG00000088885	3.18364	0.00267725	0.0172312	si:ch1073-340i21.3	protein_coding
ENSDARG00000043436	3.17491	2.03852e-08	6.88216e-07	si:dkey-5n18.1	protein_coding
ENSDARG00000100899	3.14868	9.29124e-05	0.00107659	si:ch211-241b2.5	protein_coding
ENSDARG00000100900	3.13893	0.000707768	0.00588012	si:ch211-183d5.2	protein_coding
ENSDARG00000076140	3.13852	0.00394147	0.0234886	clcf1	protein_coding
ENSDARG00000112131	3.13044	0.00540547	0.030354	zgc:173552	protein_coding
ENSDARG00000098204	3.08106	0.000112762	0.00126132	CU984600.2	protein_coding
ENSDARG00000033227	3.06229	0.00354525	0.0216129	lect2l	protein_coding
ENSDARG00000096522	3.06214	0.000907897	0.00722234	si:ch211-176g6.1	protein_coding
ENSDARG00000086998	3.06005	0.000593984	0.00507495	zgc:64002	protein_coding
ENSDARG00000077239	3.01164	2.70075e-07	6.8775e-06	si:ch211-165i18.2	protein_coding
ENSDARG00000115054	3.00812	0.00475623	0.0273917	CR354435.10	protein_coding
ENSDARG00000056065	3.00528	2.69556e-07	6.87214e-06	mov10b.2	protein_coding
ENSDARG00000071462	2.99663	0.00122843	0.0092535	lama3	protein_coding
ENSDARG00000087575	2.91922	1.19573e-09	5.55175e-08	zmp:0000000912	protein_coding
ENSDARG00000007467	2.90904	0.0064879	0.0347676	ifit10	protein_coding
ENSDARG00000039243	2.88169	1.70012e-10	9.56617e-09	zgc:152791	protein_coding
ENSDARG00000092653	2.86808	0.00330623	0.020407	si:dkey-1h24.6	protein_coding
ENSDARG00000099409	2.86768	0.00479303	0.0275325	zgc:162182	protein_coding
ENSDARG00000014427	2.85016	7.06026e-05	0.000852203	mxe	protein_coding
ENSDARG00000027907	2.81664	0.000167543	0.00176594	si:ch211-216p19.6	protein_coding
ENSDARG00000033544	2.76185	2.78457e-05	0.000392198	adamts15b	protein_coding
ENSDARG00000110909	2.75488	0.000196845	0.00203154	zgc:173552	protein_coding
ENSDARG00000088251	2.73849	2.72516e-07	6.92384e-06	si:ch211-24o10.6	protein_coding
ENSDARG00000096992	2.73516	4.3872e-05	0.000575371	zgc:153405	protein_coding
ENSDARG00000088686	2.73003	0.000595671	0.00508339	hist1h2a11	protein_coding
ENSDARG00000017489	2.72984	7.37785e-06	0.000126999	zgc:123068	protein_coding
ENSDARG00000113386	2.72619	0.00616157	0.0334941	LO018432.1	protein_coding
ENSDARG00000109458	2.70512	0.000274014	0.00266852	hist1h2a1	protein_coding
ENSDARG00000105359	2.70148	1.01358e-05	0.000166676	FP325123.1	protein_coding
ENSDARG00000016771	2.69657	1.90232e-13	1.6754e-11	tfa	protein_coding
ENSDARG00000113707	2.68675	7.24156e-05	0.000869377	CR354435.8	protein_coding
ENSDARG00000010962	2.6263	0.000375475	0.00350056	fkbp7	protein_coding
ENSDARG00000113481	2.62607	6.91077e-05	0.000838702	si:ch211-113a14.19	protein_coding
ENSDARG00000036809	2.61769	2.5665e-10	1.39141e-08	si:ch211-106j24.1	protein_coding
ENSDARG00000112561	2.60691	6.46407e-06	0.000112701	si:dkey-108k21.11	protein_coding
ENSDARG00000101885	2.60318	0.000122191	0.0013506	si:dkey-20i20.11	protein_coding
ENSDARG00000090623	2.60275	1.18013e-06	2.49958e-05	si:dkeyp-106c3.1	protein_coding
ENSDARG00000103129	2.60212	1.86417e-12	1.4274e-10	nid1b	protein_coding
ENSDARG00000056976	2.59358	0.00130513	0.00972281	ifit16	protein_coding
ENSDARG00000110035	2.59193	4.67588e-06	8.49128e-05	CR762436.1	protein_coding
ENSDARG00000110288	2.59114	2.3515e-09	1.00376e-07	CT583625.5	protein_coding
ENSDARG00000034207	2.58563	1.84548e-05	0.000276722	si:dkey-91f15.8	protein_coding
ENSDARG00000102594	2.58038	0.00226623	0.0151231	zgc:194627	protein_coding
ENSDARG00000114169	2.57611	0.000216674	0.0021963	CR354435.9	protein_coding
ENSDARG00000043182	2.57579	0.000480624	0.00427696	hhla2a.1	protein_coding
ENSDARG00000013430	2.57328	3.05049e-08	9.9373e-07	bhmt	protein_coding
ENSDARG00000105345	2.56785	0.00378364	0.0227549	zgc:173552	protein_coding
ENSDARG00000057879	2.56149	0.00238672	0.0157154	p3h3	protein_coding
ENSDARG00000076182	2.55385	4.27893e-05	0.000563082	stat1b	protein_coding
ENSDARG00000086552	2.55234	7.45463e-07	1.67275e-05	hist1h2a11	protein_coding
ENSDARG00000098595	2.54443	0.00260524	0.0168554	hist1h2a11	protein_coding
ENSDARG00000109926	2.54297	0.00235043	0.0155245	FP236812.2	protein_coding
ENSDARG00000067661	2.53884	1.6543e-06	3.37863e-05	ftr80	protein_coding
ENSDARG00000055186	2.53521	2.72021e-11	1.69781e-09	ccr9a	protein_coding
ENSDARG00000071355	2.5229	0.00153213	0.0110804	si:ch211-197g15.7	protein_coding
ENSDARG00000105400	2.51977	0.000111442	0.0012497	hist1h2a4	protein_coding
ENSDARG00000069563	2.515	0.0102801	0.0496572	zgc:153151	protein_coding
ENSDARG00000098970	2.50293	8.93683e-05	0.00104311	CU459186.1	protein_coding
ENSDARG00000112967	2.49957	0.00392287	0.0234028	CR762436.5	protein_coding
ENSDARG00000105366	2.4961	6.78029e-05	0.000825114	hist1h2a10	protein_coding
ENSDARG00000010729	2.49028	3.56096e-06	6.70713e-05	CABZ01073795.1	protein_coding
ENSDARG00000042784	2.48969	0.00575341	0.0317921	gdf7	protein_coding
ENSDARG00000114133	2.46146	6.66466e-05	0.00081399	hist1h2a5	protein_coding
ENSDARG00000086374	2.45962	2.12672e-05	0.000311966	isg15	protein_coding
ENSDARG00000105374	2.45359	8.71752e-05	0.00101965	CU457819.3	protein_coding
ENSDARG00000041339	2.45115	0.00765328	0.0396952	zgc:92380	protein_coding
ENSDARG00000025672	2.44771	0.00140621	0.0103518	antxr1a	protein_coding
ENSDARG00000051718	2.44395	0.000130099	0.00142189	si:ch211-113a14.24	protein_coding
ENSDARG00000078731	2.44065	0.000189591	0.00197037	si:dkey-85k7.12	protein_coding
ENSDARG00000100906	2.43724	0.000193304	0.00200242	hist1h2a11	protein_coding
ENSDARG00000044490	2.4344	1.57387e-05	0.000240397	tlr9	protein_coding
ENSDARG00000068941	2.4333	2.96195e-08	9.69138e-07	zgc:113983	protein_coding
ENSDARG00000015065	2.43292	4.23047e-07	1.02238e-05	c4	protein_coding
ENSDARG00000032862	2.43059	4.36517e-16	6.07905e-14	ugt5g1	protein_coding
ENSDARG00000096514	2.42831	0.00383241	0.02298	si:ch211-286b5.2	protein_coding
ENSDARG00000042180	2.42821	9.38256e-06	0.000156954	foxl2a	protein_coding
ENSDARG00000093748	2.42641	0.00676995	0.0359248	si:ch211-217k17.11	protein_coding
ENSDARG00000075538	2.42402	1.40193e-07	3.895e-06	zgc:163061	protein_coding
ENSDARG00000094854	2.41723	1.42056e-08	5.0163e-07	ms4a17a.8	protein_coding
ENSDARG00000077456	2.41489	8.36362e-08	2.43605e-06	si:ch211-113a14.12	protein_coding
ENSDARG00000070297	2.40694	5.95414e-09	2.31133e-07	CR354435.1	protein_coding
ENSDARG00000076106	2.40657	0.00128304	0.00958712	ftr43	protein_coding
ENSDARG00000112491	2.39978	0.00277095	0.0177217	CR354435.6	protein_coding
ENSDARG00000112175	2.38548	5.65035e-12	3.97164e-10	zgc:173552	protein_coding
ENSDARG00000099390	2.37723	3.01921e-08	9.86422e-07	lama2	protein_coding
ENSDARG00000046019	2.37005	0.000121744	0.00134692	snai1b	protein_coding
ENSDARG00000105468	2.35191	4.19035e-06	7.73566e-05	zgc:112234	protein_coding
ENSDARG00000105484	2.35094	0.0055759	0.0309754	FP325123.3	protein_coding
ENSDARG00000058042	2.34016	0.0007073	0.00588012	kitlgb	protein_coding
ENSDARG00000105665	2.33991	0.00263682	0.0170251	FO704741.1	lincRNA
ENSDARG00000093639	2.33867	0.0053227	0.0299799	BX537282.1	processed_transcript
ENSDARG00000116781	2.33517	0.00401017	0.0238406	CR354435.13	protein_coding
ENSDARG00000014091	2.33118	0.000226756	0.00228005	osr1	protein_coding
ENSDARG00000091252	2.32265	0.00142203	0.0104539	slc22a7b.2	protein_coding
ENSDARG00000024877	2.32111	0.00273812	0.0175571	ptgr1	protein_coding
ENSDARG00000112593	2.31911	1.5694e-07	4.3279e-06	hist1h2a2	protein_coding
ENSDARG00000116654	2.31841	1.57675e-11	1.02429e-09	si:dkey-261m9.6	protein_coding
ENSDARG00000095627	2.30949	3.39792e-11	2.08001e-09	c1qc	protein_coding
ENSDARG00000015559	2.30517	9.3117e-07	2.03415e-05	fstl1a	protein_coding
ENSDARG00000099155	2.30348	2.07848e-05	0.000306301	tpst2	protein_coding
ENSDARG00000103551	2.30296	0.000230624	0.0023106	rnf213b	protein_coding
ENSDARG00000021688	2.29218	0.000550886	0.00477	mxa	protein_coding
ENSDARG00000074012	2.28572	0.00110482	0.00847127	si:ch1073-159d7.7	protein_coding
ENSDARG00000088069	2.27341	0.000150294	0.00161157	CR759879.1	protein_coding
ENSDARG00000111648	2.2704	5.38509e-05	0.000681764	hist1h2a2	protein_coding
ENSDARG00000096978	2.26923	0.000238268	0.00237674	CU972512.1	lincRNA
ENSDARG00000027529	2.25944	5.29935e-15	5.99392e-13	hmox1a	protein_coding
ENSDARG00000115038	2.25922	1.13266e-05	0.000182727	si:dkey-4c23.5	protein_coding
ENSDARG00000111396	2.25463	2.83208e-09	1.18617e-07	zgc:173552	protein_coding
ENSDARG00000115875	2.25293	0.000896937	0.00715815	FP236812.6	protein_coding
ENSDARG00000099672	2.25271	4.28982e-08	1.34061e-06	capgb	protein_coding
ENSDARG00000105340	2.23768	1.5064e-09	6.80844e-08	zgc:112234	protein_coding
ENSDARG00000108340	2.23738	1.2907e-05	0.000202674	si:ch211-283g2.2	protein_coding
ENSDARG00000090352	2.23699	0.000788811	0.0064595	CR855311.1	processed_transcript
ENSDARG00000105478	2.23175	0.000212416	0.00215826	si:ch1073-153i20.5	protein_coding
ENSDARG00000099123	2.23154	3.11927e-06	5.98138e-05	hist1h2a4	protein_coding
ENSDARG00000071543	2.23068	0.00347792	0.0212944	si:dkey-42i9.7	protein_coding
ENSDARG00000018587	2.22945	0.000791387	0.00647108	zgc:152658	protein_coding
ENSDARG00000012405	2.22718	4.05138e-14	3.92491e-12	col1a1a	protein_coding
ENSDARG00000093572	2.2257	3.93342e-05	0.000523412	lamc3	protein_coding
ENSDARG00000083389	2.22272	4.60855e-06	8.39907e-05	RF00191	snoRNA
ENSDARG00000024789	2.20842	0.0101714	0.0492535	mxc	protein_coding
ENSDARG00000051737	2.20688	1.1273e-08	4.09762e-07	zgc:173552	protein_coding
ENSDARG00000112375	2.20089	2.5391e-05	0.000362669	CR762436.4	protein_coding
ENSDARG00000076320	2.19878	0.00202434	0.0138109	ano9a	protein_coding
ENSDARG00000017780	2.19824	9.48545e-38	6.21632e-35	rorcb	protein_coding
ENSDARG00000100024	2.18895	0.000685475	0.00573554	hist1h2a6	protein_coding
ENSDARG00000040295	2.18626	1.24932e-27	4.5635e-25	apoeb	protein_coding
ENSDARG00000044125	2.18503	9.54963e-07	2.07595e-05	txn	protein_coding
ENSDARG00000040717	2.18455	2.70274e-12	2.00742e-10	macc1	protein_coding
ENSDARG00000105508	2.17764	3.93432e-08	1.24523e-06	si:dkey-23a13.21	protein_coding
ENSDARG00000105314	2.17517	0.00575731	0.0318008	hist1h2a4	protein_coding
ENSDARG00000114125	2.17196	2.02567e-09	8.76426e-08	si:dkey-261m9.19	protein_coding
ENSDARG00000114661	2.15159	7.07175e-05	0.000852667	BX321875.4	protein_coding
ENSDARG00000076766	2.14129	2.00741e-06	4.02239e-05	zgc:163061	protein_coding
ENSDARG00000020354	2.13761	0.00763611	0.0396246	lmx1a	protein_coding
ENSDARG00000091131	2.13721	4.84362e-106	1.79876e-102	cry1bb	protein_coding
ENSDARG00000110841	2.13706	1.10938e-05	0.000180037	si:dkey-108k21.14	protein_coding
ENSDARG00000090600	2.13441	0.00409443	0.0242381	si:ch211-213a13.1	protein_coding
ENSDARG00000093159	2.13354	3.23101e-07	8.02601e-06	si:dkeyp-106c3.3	protein_coding
ENSDARG00000114334	2.13324	1.57409e-05	0.000240397	zgc:173552	protein_coding
ENSDARG00000090889	2.12887	1.92806e-05	0.000287744	si:ch211-132p1.3	protein_coding
ENSDARG00000011581	2.12805	3.43982e-05	0.000467354	si:dkey-23k10.5	protein_coding
ENSDARG00000075508	2.12674	4.42097e-05	0.000578779	si:dkey-108k21.10	protein_coding
ENSDARG00000042947	2.12659	0.00265415	0.0171172	mstna	protein_coding
ENSDARG00000101720	2.12489	5.56265e-06	9.86153e-05	HIST2H3D	protein_coding
ENSDARG00000104185	2.11747	0.00752049	0.0391797	AL831726.2	protein_coding
ENSDARG00000094154	2.10532	1.36245e-07	3.79004e-06	hist2h3c	protein_coding
ENSDARG00000039852	2.10169	0.00210607	0.014255	ftr93	protein_coding
ENSDARG00000034718	2.09716	5.2217e-06	9.36794e-05	tfpia	protein_coding
ENSDARG00000058252	2.09026	0.00513753	0.0291283	adamts15b	protein_coding
ENSDARG00000086452	2.0899	0.00596299	0.032687	dthd1	protein_coding
ENSDARG00000088656	2.07992	0.000104107	0.00118171	si:ch211-212k18.6	protein_coding
ENSDARG00000056087	2.0771	2.45935e-06	4.83239e-05	ecrg4a	protein_coding
ENSDARG00000051736	2.07628	0.0036564	0.0221151	hist1h2a4	protein_coding
ENSDARG00000088900	2.07279	5.02039e-05	0.000643282	si:dkey-21o19.2	protein_coding
ENSDARG00000025043	2.06638	0.00856097	0.0432258	trip13	protein_coding
ENSDARG00000062902	2.05711	0.0032759	0.0202704	si:dkey-220f10.4	protein_coding
ENSDARG00000115644	2.05157	2.07321e-10	1.14914e-08	zgc:173552	protein_coding
ENSDARG00000114500	2.04988	4.92218e-05	0.000632869	CU302436.4	protein_coding
ENSDARG00000103819	2.04902	0.000890211	0.00711466	CU459186.5	protein_coding
ENSDARG00000018616	2.04872	5.04025e-06	9.07163e-05	agtr1a	protein_coding
ENSDARG00000105223	2.04774	4.33878e-06	7.98322e-05	pmp22a	protein_coding
ENSDARG00000038489	2.04595	9.04817e-08	2.61493e-06	b3gnt7	protein_coding
ENSDARG00000109737	2.0444	0.000850686	0.00685781	CR354435.2	protein_coding
ENSDARG00000115799	2.03708	0.00036201	0.00338921	HIST1H4A	protein_coding
ENSDARG00000086591	2.03066	5.18927e-09	2.04807e-07	si:ch211-113a14.11	protein_coding
ENSDARG00000117643	2.02909	2.41776e-05	0.000346894	CU896641.1	lincRNA
ENSDARG00000031359	2.02751	0.00660816	0.0352424	cmpk2	protein_coding
ENSDARG00000077290	2.02678	0.00407499	0.0241422	mmp25a	protein_coding
ENSDARG00000117263	2.01586	1.26967e-05	0.000200218	CABZ01056054.1	lincRNA
ENSDARG00000089362	2.01374	0.00457311	0.0265014	grn1	protein_coding
ENSDARG00000033046	2.01059	1.93024e-15	2.38942e-13	ccni2	protein_coding
ENSDARG00000114895	2.00392	7.0994e-07	1.60598e-05	si:ch211-113a14.22	protein_coding
ENSDARG00000102793	1.99458	0.000317661	0.00303132	slc16a6a	protein_coding
ENSDARG00000024537	1.98936	5.55153e-07	1.29936e-05	emilin1a	protein_coding
ENSDARG00000113580	1.98856	0.00818545	0.0417757	RF00001	rRNA
ENSDARG00000105459	1.97873	6.99979e-07	1.58505e-05	CU457819.7	protein_coding
ENSDARG00000078941	1.97696	3.74674e-07	9.18426e-06	ano9a	protein_coding
ENSDARG00000070038	1.97694	7.52967e-05	0.000899604	rbp2a	protein_coding
ENSDARG00000103498	1.97653	0.000288557	0.00278942	epd	protein_coding
ENSDARG00000095789	1.97495	7.3584e-05	0.000881504	ccr8.1	protein_coding
ENSDARG00000056643	1.97024	8.16088e-05	0.00096365	slc22a7b.1	protein_coding
ENSDARG00000113800	1.96199	1.01294e-05	0.000166676	si:dkey-108k21.19	protein_coding
ENSDARG00000045453	1.96067	1.66068e-06	3.38548e-05	f13a1a.1	protein_coding
ENSDARG00000073965	1.9563	0.00855031	0.0431846	si:dkey-202b22.5	protein_coding
ENSDARG00000086576	1.95618	6.96182e-14	6.43665e-12	si:cabz01069012.2	protein_coding
ENSDARG00000006456	1.95301	2.38436e-06	4.70579e-05	pdgfrl	protein_coding
ENSDARG00000055175	1.94129	0.00621604	0.0337079	c1qtnf6a	protein_coding
ENSDARG00000058379	1.93309	0.00308095	0.0193053	otpb	protein_coding
ENSDARG00000004954	1.93176	1.33667e-20	2.89162e-18	grna	protein_coding
ENSDARG00000112019	1.92724	4.01926e-05	0.000534351	CABZ01065423.1	protein_coding
ENSDARG00000055901	1.92649	0.000765118	0.0063002	steap4	protein_coding
ENSDARG00000112840	1.92289	0.00075876	0.00625479	hist1h2a10	protein_coding
ENSDARG00000105350	1.92137	0.00176196	0.0123459	si:ch1073-153i20.4	protein_coding
ENSDARG00000051735	1.91971	1.41639e-08	5.00951e-07	si:ch211-113a14.18	protein_coding
ENSDARG00000092894	1.91338	0.00822529	0.0419108	si:ch211-114l13.9	protein_coding
ENSDARG00000075389	1.90741	0.000427611	0.00388899	si:ch211-281g13.4	protein_coding
ENSDARG00000089039	1.90711	6.81091e-05	0.000827485	zgc:173585	protein_coding
ENSDARG00000038424	1.90447	7.13236e-06	0.000123101	C4B	protein_coding
ENSDARG00000111494	1.89809	0.00404056	0.0239638	CR354435.4	protein_coding
ENSDARG00000114370	1.89737	1.05537e-06	2.25463e-05	FQ312024.2	protein_coding
ENSDARG00000097653	1.88738	0.000206776	0.00211348	si:dkey-23k10.3	protein_coding
ENSDARG00000010312	1.88725	0.00245139	0.0160416	cp	protein_coding
ENSDARG00000105364	1.88047	9.10226e-11	5.24074e-09	si:ch73-223f5.1	protein_coding
ENSDARG00000094708	1.87474	0.00388285	0.0231951	sftpba	protein_coding
ENSDARG00000054418	1.86762	0.000963847	0.0075969	ssuh2.2	protein_coding
ENSDARG00000115766	1.8643	0.00355527	0.0216621	si:ch73-36p18.1	protein_coding
ENSDARG00000059053	1.85898	2.13582e-07	5.594e-06	slc13a4	protein_coding
ENSDARG00000090340	1.85662	0.000530561	0.00463606	si:dkey-27o4.1	protein_coding
ENSDARG00000046021	1.85534	0.00759367	0.0394227	CU914487.1	protein_coding
ENSDARG00000077309	1.85306	0.00173941	0.0122187	si:ch211-209f23.6	protein_coding
ENSDARG00000110812	1.85272	1.01009e-07	2.88918e-06	FQ312024.1	protein_coding
ENSDARG00000054929	1.85166	1.14236e-05	0.000183785	zgc:110540	protein_coding
ENSDARG00000069675	1.85028	5.90173e-14	5.57214e-12	her8.2	protein_coding
ENSDARG00000011571	1.84981	5.10257e-05	0.00065155	calcrlb	protein_coding
ENSDARG00000076870	1.84898	3.81244e-06	7.13855e-05	piezo1	protein_coding
ENSDARG00000101050	1.84305	0.00184565	0.0128154	tmc8	protein_coding
ENSDARG00000056652	1.84059	0.000653358	0.00550402	zmp:0000001102	protein_coding
ENSDARG00000012066	1.83826	4.6548e-07	1.10929e-05	dcn	protein_coding
ENSDARG00000089661	1.8347	6.9823e-05	0.000844623	FO704622.1	protein_coding
ENSDARG00000104980	1.83091	1.16647e-11	7.82868e-10	CU695117.1	protein_coding
ENSDARG00000058731	1.82987	0.00017276	0.00181065	slc2a6	protein_coding
ENSDARG00000039459	1.82824	4.94683e-05	0.000635557	qsox1	protein_coding
ENSDARG00000059294	1.82762	1.75931e-10	9.84946e-09	marco	protein_coding
ENSDARG00000037997	1.82503	5.48644e-26	1.6979e-23	tubb5	protein_coding
ENSDARG00000032637	1.82322	1.37557e-05	0.00021404	si:dkey-261m9.12	protein_coding
ENSDARG00000004473	1.81161	0.00398064	0.023684	tbx21	protein_coding
ENSDARG00000005085	1.80611	1.15253e-05	0.000185019	ggctb	protein_coding
ENSDARG00000059917	1.80504	0.00727899	0.0381714	ccnj	protein_coding
ENSDARG00000036106	1.80448	1.9187e-08	6.53707e-07	rgs18	protein_coding
ENSDARG00000111247	1.8043	0.00688536	0.0364763	CR762436.3	protein_coding
ENSDARG00000013460	1.80407	0.00045555	0.00408638	wfikkn2a	protein_coding
ENSDARG00000020007	1.80004	5.27632e-08	1.61272e-06	col1a2	protein_coding
ENSDARG00000113399	1.79954	0.00594293	0.0326158	hist1h2a4	protein_coding
ENSDARG00000003469	1.79521	2.65491e-05	0.000375122	neurod4	protein_coding
ENSDARG00000054690	1.79504	9.61359e-06	0.000160217	si:dkey-166k12.1	protein_coding
ENSDARG00000089404	1.79325	2.17164e-06	4.32041e-05	si:dkey-24p1.7	protein_coding
ENSDARG00000075015	1.78752	1.44965e-14	1.50238e-12	soul5	protein_coding
ENSDARG00000095719	1.77678	0.00980851	0.0479704	si:dkey-222h21.2	protein_coding
ENSDARG00000074613	1.77274	0.00023621	0.00236019	si:ch211-240l19.6	protein_coding
ENSDARG00000086703	1.76994	1.06348e-07	3.02263e-06	si:dkey-126g1.7	protein_coding
ENSDARG00000068653	1.76931	0.00344261	0.0211143	rhoga	protein_coding
ENSDARG00000073716	1.76442	0.00145643	0.0106401	cpxm1a	protein_coding
ENSDARG00000100287	1.76005	0.00951025	0.0468718	SLA (1 of many)	protein_coding
ENSDARG00000091317	1.75831	2.88626e-16	4.09629e-14	hunk	protein_coding
ENSDARG00000004953	1.75792	0.00701561	0.0370168	mxb	protein_coding
ENSDARG00000036894	1.75254	0.00685531	0.0363258	zgc:101853	protein_coding
ENSDARG00000089769	1.75241	8.80156e-16	1.14688e-13	hapln1a	protein_coding
ENSDARG00000079501	1.74818	1.4407e-10	8.16835e-09	si:ch211-149l1.2	protein_coding
ENSDARG00000091905	1.74649	3.65597e-06	6.87445e-05	si:dkey-108k21.21	protein_coding
ENSDARG00000076571	1.7437	2.18245e-06	4.33803e-05	sp5a	protein_coding
ENSDARG00000115938	1.74179	1.53616e-09	6.92889e-08	zgc:171759	protein_coding
ENSDARG00000006901	1.73818	0.00292176	0.0184793	si:ch1073-459j12.1	protein_coding
ENSDARG00000114649	1.73753	0.00618825	0.0335735	LO018106.1	protein_coding
ENSDARG00000040442	1.73562	0.000291262	0.00281191	prtgb	protein_coding
ENSDARG00000043586	1.73042	9.70903e-05	0.00111571	fas	protein_coding
ENSDARG00000098774	1.72946	0.00776228	0.0401857	si:zfos-741a10.3	protein_coding
ENSDARG00000020079	1.72943	2.36635e-05	0.000341275	neil3	protein_coding
ENSDARG00000044613	1.72839	6.66106e-05	0.00081399	c1qa	protein_coding
ENSDARG00000105444	1.72581	0.000106877	0.0012064	hist1h2a11	protein_coding
ENSDARG00000041828	1.7216	0.00476504	0.0274338	si:dkeyp-28d2.4	protein_coding
ENSDARG00000044775	1.71643	9.28111e-07	2.02946e-05	fut7	protein_coding
ENSDARG00000005392	1.71559	0.000329904	0.00313338	slc5a5	protein_coding
ENSDARG00000044612	1.70952	3.90497e-05	0.000521021	c1qb	protein_coding
ENSDARG00000026704	1.70939	2.82096e-07	7.14279e-06	ftr72	protein_coding
ENSDARG00000071684	1.70624	0.00232815	0.0154209	rx1	protein_coding
ENSDARG00000020031	1.7027	0.00852444	0.0430895	cldn11a	protein_coding
ENSDARG00000030782	1.70102	2.27035e-07	5.88917e-06	exoc3l2b	protein_coding
ENSDARG00000098490	1.69575	0.00703926	0.0370976	CABZ01118270.1	protein_coding
ENSDARG00000095915	1.694	0.000122506	0.00135334	col6a3	protein_coding
ENSDARG00000017299	1.69164	3.72009e-12	2.68255e-10	fabp11a	protein_coding
ENSDARG00000074782	1.69068	2.99506e-07	7.53227e-06	adgrg3	protein_coding
ENSDARG00000094965	1.68283	8.48899e-91	2.3644e-87	nfil3-5	protein_coding
ENSDARG00000030006	1.68259	0.0063837	0.03433	slc6a7	protein_coding
ENSDARG00000098754	1.68222	0.00105221	0.0081606	si:ch211-156p11.1	protein_coding
ENSDARG00000061177	1.67759	3.14388e-05	0.000433226	mov10b.1	protein_coding
ENSDARG00000014059	1.67204	2.63863e-09	1.10723e-07	cldn5b	protein_coding
ENSDARG00000096304	1.67054	0.00964302	0.0473899	btr31	protein_coding
ENSDARG00000092470	1.66705	0.000394937	0.00364238	thbd	protein_coding
ENSDARG00000070239	1.66685	8.8179e-05	0.00103031	knl1	protein_coding
ENSDARG00000116635	1.66478	0.00116937	0.00888368	RF00001	rRNA
ENSDARG00000070360	1.66417	6.21188e-05	0.000769817	inka1a	protein_coding
ENSDARG00000104217	1.65859	5.35449e-09	2.10793e-07	gpc2	protein_coding
ENSDARG00000026990	1.64755	5.58307e-06	9.88887e-05	klhl6	protein_coding
ENSDARG00000042525	1.64624	2.25738e-05	0.00032768	ebf2	protein_coding
ENSDARG00000076789	1.64529	5.86148e-07	1.36189e-05	cx32.2	protein_coding
ENSDARG00000026454	1.6399	0.00269405	0.0173243	mis12	protein_coding
ENSDARG00000042984	1.63414	0.00120452	0.00910725	fpr1	protein_coding
ENSDARG00000102245	1.63063	8.97262e-05	0.00104456	tk1	protein_coding
ENSDARG00000100842	1.62268	0.00998963	0.0486639	si:dkey-156k2.3	protein_coding
ENSDARG00000086130	1.62236	5.34757e-07	1.25426e-05	si:ch211-42i6.2	protein_coding
ENSDARG00000098622	1.62024	0.000100369	0.0011457	ccne1	protein_coding
ENSDARG00000007990	1.61875	1.58655e-06	3.26307e-05	wt1b	protein_coding
ENSDARG00000003200	1.6167	2.13104e-05	0.000312393	foxm1	protein_coding
ENSDARG00000057787	1.61486	4.7249e-10	2.40366e-08	itgae.2	protein_coding
ENSDARG00000111587	1.61458	0.00384075	0.0230114	CABZ01103860.1	protein_coding
ENSDARG00000042894	1.61452	1.85888e-07	5.00841e-06	tyms	protein_coding
ENSDARG00000010556	1.61191	0.000475903	0.00423994	mmp25b	protein_coding
ENSDARG00000074867	1.60942	0.00162541	0.0116417	stim2a	protein_coding
ENSDARG00000105418	1.60817	0.00534525	0.0300765	CU457819.6	protein_coding
ENSDARG00000063385	1.59046	1.72018e-08	5.94248e-07	cenpe	protein_coding
ENSDARG00000104691	1.58324	0.000113404	0.00126671	cd79b	protein_coding
ENSDARG00000093381	1.57592	1.69286e-13	1.49684e-11	tgm2l	protein_coding
ENSDARG00000102798	1.57316	1.8824e-09	8.22424e-08	mcm2	protein_coding
ENSDARG00000045561	1.56802	0.00695152	0.0367482	dram1	protein_coding
ENSDARG00000025903	1.56693	4.28086e-05	0.000563082	lgals9l1	protein_coding
ENSDARG00000017320	1.56669	0.00118756	0.00899428	f11r.1	protein_coding
ENSDARG00000102478	1.5664	1.07263e-06	2.28931e-05	BX470176.1	protein_coding
ENSDARG00000071586	1.56179	0.000808698	0.00658364	tgfbi	protein_coding
ENSDARG00000029179	1.56074	0.00256947	0.0166967	foxd1	protein_coding
ENSDARG00000031136	1.55653	0.00324144	0.0201018	moxd1	protein_coding
ENSDARG00000015460	1.55573	6.38767e-07	1.46732e-05	racgap1	protein_coding
ENSDARG00000032405	1.55328	0.00211728	0.0142971	ckap4	protein_coding
ENSDARG00000104640	1.55267	0.0085936	0.0433317	BX511034.7	protein_coding
ENSDARG00000001452	1.54905	0.000326669	0.00310663	adam8a	protein_coding
ENSDARG00000004937	1.54832	0.0015243	0.011031	skp2	protein_coding
ENSDARG00000079997	1.54581	0.00289492	0.0183356	si:zfos-223e1.2	protein_coding
ENSDARG00000000767	1.54419	3.05824e-08	9.94799e-07	spi1b	protein_coding
ENSDARG00000114534	1.53946	3.28668e-09	1.35618e-07	FQ312024.3	protein_coding
ENSDARG00000033971	1.53773	0.000334721	0.00317507	prrx1a	protein_coding
ENSDARG00000005098	1.53697	3.39421e-05	0.000462003	zgc:86764	protein_coding
ENSDARG00000105430	1.53694	7.50619e-05	0.000897279	si:ch73-368j24.11	protein_coding
ENSDARG00000042221	1.53264	0.000801507	0.00654182	mthfd1l	protein_coding
ENSDARG00000088332	1.52748	0.00516536	0.0292489	alx4a	protein_coding
ENSDARG00000110040	1.52635	1.82689e-06	3.69725e-05	CABZ01092781.1	protein_coding
ENSDARG00000077139	1.523	2.46945e-09	1.04609e-07	col6a3	protein_coding
ENSDARG00000116221	1.51932	0.000629402	0.00533448	LO018205.2	protein_coding
ENSDARG00000059883	1.51802	7.67745e-08	2.25983e-06	trpv1	protein_coding
ENSDARG00000077167	1.51759	0.00343151	0.0210578	nmbb	protein_coding
ENSDARG00000040445	1.51701	4.44461e-08	1.3851e-06	si:ch211-219a4.3	protein_coding
ENSDARG00000043004	1.51673	0.00791532	0.0407413	si:dkeyp-117h8.4	protein_coding
ENSDARG00000063191	1.51367	3.42149e-05	0.000465373	extl2	protein_coding
ENSDARG00000030289	1.51292	1.45392e-07	4.03439e-06	jag1a	protein_coding
ENSDARG00000058822	1.51256	0.00374046	0.0225317	wnt3a	protein_coding
ENSDARG00000068969	1.51229	0.00585537	0.0322226	zgc:153759	protein_coding
ENSDARG00000002494	1.51152	0.00186629	0.0129266	itgb6	protein_coding
ENSDARG00000094984	1.51145	4.51453e-07	1.08048e-05	si:ch211-197g15.8	protein_coding
ENSDARG00000028306	1.50703	0.000328905	0.00312523	prph	protein_coding
ENSDARG00000055398	1.49868	4.59991e-05	0.000596943	foxc1b	protein_coding
ENSDARG00000086840	1.49818	0.000783128	0.00641767	si:ch211-266k8.4	protein_coding
ENSDARG00000011463	1.49767	0.000971159	0.00764372	CABZ01044048.1	protein_coding
ENSDARG00000078729	1.49726	0.000151346	0.00162208	ackr4a	protein_coding
ENSDARG00000078433	1.49469	0.0047876	0.0275154	spc25	protein_coding
ENSDARG00000104197	1.49378	2.0429e-07	5.39976e-06	ptpn22	protein_coding
ENSDARG00000052322	1.48986	2.40497e-06	4.73388e-05	tlr5b	protein_coding
ENSDARG00000101482	1.48918	1.74156e-08	5.99775e-07	hk2	protein_coding
ENSDARG00000074815	1.48734	3.17019e-18	5.56207e-16	mxra5a	protein_coding
ENSDARG00000001767	1.48651	3.16654e-08	1.02553e-06	slc29a2	protein_coding
ENSDARG00000091930	1.47896	0.00645146	0.0345979	si:ch211-12e13.1	protein_coding
ENSDARG00000041060	1.47254	1.89883e-06	3.82546e-05	lgals9l3	protein_coding
ENSDARG00000039354	1.47223	0.00701501	0.0370168	ska1	protein_coding
ENSDARG00000091411	1.46586	0.00088763	0.00709658	si:ch211-214p13.9	protein_coding
ENSDARG00000088274	1.4618	1.08656e-05	0.00017685	si:ch211-181d7.1	protein_coding
ENSDARG00000089701	1.45772	0.000305015	0.00292743	trabd2a	protein_coding
ENSDARG00000088581	1.45543	0.00304296	0.0191211	f10	protein_coding
ENSDARG00000088631	1.45166	0.000762503	0.00628099	BX000363.1	protein_coding
ENSDARG00000055523	1.44796	0.00869591	0.0437584	slc22a6l	protein_coding
ENSDARG00000013771	1.44725	1.69464e-05	0.000257045	ctss2.2	protein_coding
ENSDARG00000106745	1.44597	0.00126605	0.00947917	FO904901.1	protein_coding
ENSDARG00000004232	1.4435	9.18673e-09	3.41164e-07	dlb	protein_coding
ENSDARG00000101785	1.44165	2.6154e-10	1.41447e-08	laptm5	protein_coding
ENSDARG00000103409	1.44012	2.03403e-09	8.78337e-08	uhrf1	protein_coding
ENSDARG00000045530	1.43758	3.83272e-05	0.000512916	si:ch211-244b2.4	protein_coding
ENSDARG00000058346	1.4375	0.0100641	0.0488771	sass6	protein_coding
ENSDARG00000091481	1.43426	4.10784e-10	2.11877e-08	foxc1a	protein_coding
ENSDARG00000044039	1.42915	0.00185359	0.0128586	stx11a	protein_coding
ENSDARG00000021959	1.42673	0.00101288	0.0079162	zgc:101100	protein_coding
ENSDARG00000099989	1.42647	0.00425006	0.0250378	creld1a	protein_coding
ENSDARG00000076638	1.42447	4.67282e-10	2.3826e-08	MEX3A	protein_coding
ENSDARG00000068939	1.42444	0.0011186	0.00855638	xaf1	protein_coding
ENSDARG00000112528	1.42431	1.38194e-06	2.88588e-05	CR354435.7	protein_coding
ENSDARG00000014340	1.42332	0.00491684	0.0281565	rab11al	protein_coding
ENSDARG00000040528	1.42156	6.18442e-12	4.30629e-10	lgals3bpb	protein_coding
ENSDARG00000100952	1.42029	2.32028e-06	4.58745e-05	wu:fj16a03	protein_coding
ENSDARG00000094503	1.41777	0.00159105	0.0114287	AL954767.1	processed_transcript
ENSDARG00000020219	1.41455	5.25851e-26	1.65028e-23	dld	protein_coding
ENSDARG00000055504	1.41391	1.46082e-09	6.62931e-08	si:ch211-212k18.7	protein_coding
ENSDARG00000024575	1.41299	1.43369e-06	2.98328e-05	kif26bb	protein_coding
ENSDARG00000078654	1.41195	2.62464e-07	6.73758e-06	tpx2	protein_coding
ENSDARG00000004618	1.41087	0.000794078	0.00648832	stx2a	protein_coding
ENSDARG00000105431	1.40866	0.00010224	0.00116289	si:dkey-23a13.9	protein_coding
ENSDARG00000102300	1.40763	0.0016473	0.0117674	ca9	protein_coding
ENSDARG00000042563	1.40639	0.000946205	0.00747106	mis18bp1	protein_coding
ENSDARG00000062688	1.40145	3.07774e-08	9.99684e-07	gpnmb	protein_coding
ENSDARG00000077488	1.39844	4.69533e-06	8.51965e-05	si:ch73-289h5.4	protein_coding
ENSDARG00000076594	1.39779	7.13053e-16	9.57123e-14	pcdh12	protein_coding
ENSDARG00000067751	1.39733	5.0205e-05	0.000643282	si:rp71-68n21.9	protein_coding
ENSDARG00000080020	1.39262	0.000675909	0.00567154	il13ra1	protein_coding
ENSDARG00000098012	1.39261	3.75351e-14	3.65222e-12	itgae.1	protein_coding
ENSDARG00000114743	1.39205	0.00896719	0.0447705	si:dkey-11d20.1	protein_coding
ENSDARG00000042722	1.39022	0.000157758	0.00168029	blnk	protein_coding
ENSDARG00000090882	1.38928	1.04703e-11	7.06967e-10	si:rp71-36a1.5	protein_coding
ENSDARG00000058133	1.38622	9.21819e-07	2.01982e-05	foxd2	protein_coding
ENSDARG00000062355	1.38136	0.00939966	0.0464913	axdnd1	protein_coding
ENSDARG00000088828	1.38036	0.0055576	0.0309045	paqr8	protein_coding
ENSDARG00000056832	1.38009	0.00703123	0.0370641	exo1	protein_coding
ENSDARG00000032885	1.37971	0.000767966	0.00631666	si:ch211-226m7.4	protein_coding
ENSDARG00000024204	1.37872	2.35769e-08	7.84089e-07	mcm3	protein_coding
ENSDARG00000057323	1.37314	2.41586e-05	0.000346843	e2f8	protein_coding
ENSDARG00000041381	1.36627	3.36774e-57	5.00266e-54	arntl2	protein_coding
ENSDARG00000090396	1.36587	0.000262613	0.00258268	si:cabz01074946.1	protein_coding
ENSDARG00000115281	1.36319	8.69067e-06	0.000146479	CU302436.5	protein_coding
ENSDARG00000024488	1.36098	2.29522e-06	4.54192e-05	top2a	protein_coding
ENSDARG00000001558	1.35945	2.1447e-05	0.000314189	kifc1	protein_coding
ENSDARG00000091150	1.35512	1.16826e-06	2.47915e-05	mki67	protein_coding
ENSDARG00000039900	1.35072	9.04691e-06	0.000151909	si:ch73-168d20.1	protein_coding
ENSDARG00000051857	1.35024	6.43472e-05	0.000791708	tes	protein_coding
ENSDARG00000070109	1.34629	9.72069e-07	2.10697e-05	ncapg	protein_coding
ENSDARG00000071636	1.34556	0.000490439	0.00434512	BX511034.2	protein_coding
ENSDARG00000102366	1.34109	5.60735e-06	9.91611e-05	micall2a	protein_coding
ENSDARG00000045190	1.33935	0.000239043	0.00238209	ch25h	protein_coding
ENSDARG00000037178	1.33584	2.26532e-07	5.88298e-06	zic2b	protein_coding
ENSDARG00000044415	1.33477	0.00820254	0.0418427	tlr5a	protein_coding
ENSDARG00000070494	1.33141	7.70325e-05	0.000915923	pdgfra	protein_coding
ENSDARG00000068288	1.32686	2.8749e-05	0.000403138	lamc2	protein_coding
ENSDARG00000079889	1.32664	2.04945e-07	5.41065e-06	phldb2a	protein_coding
ENSDARG00000038541	1.32588	1.75659e-06	3.56145e-05	ccr12a	protein_coding
ENSDARG00000074656	1.32393	0.000104304	0.00118275	ctss2.1	protein_coding
ENSDARG00000092985	1.3237	5.66006e-15	6.30588e-13	CU499330.1	processed_transcript
ENSDARG00000095295	1.32348	0.00925639	0.045905	si:rp71-36a1.1	protein_coding
ENSDARG00000055955	1.32331	3.01319e-05	0.000418578	lcp2a	protein_coding
ENSDARG00000070165	1.32277	1.43174e-12	1.11545e-10	tnfrsf1b	protein_coding
ENSDARG00000100691	1.3224	8.33493e-10	3.99396e-08	prss35	protein_coding
ENSDARG00000099767	1.32157	7.88257e-06	0.000134486	fhdc2	protein_coding
ENSDARG00000045167	1.31823	0.000948457	0.00748619	dlgap5	protein_coding
ENSDARG00000070830	1.31764	0.00115829	0.00880854	zgc:136858	protein_coding
ENSDARG00000040041	1.31712	5.87254e-08	1.7803e-06	mcm4	protein_coding
ENSDARG00000045815	1.31693	0.0067413	0.0357983	mcm10	protein_coding
ENSDARG00000074646	1.3139	0.00845623	0.0428231	adamts16	protein_coding
ENSDARG00000077907	1.31331	0.00846785	0.0428526	si:dkey-183p4.10	protein_coding
ENSDARG00000105328	1.3122	0.00155307	0.0111956	si:dkey-23a13.17	protein_coding
ENSDARG00000041699	1.31213	0.007396	0.0386527	piwil1	protein_coding
ENSDARG00000002304	1.3106	0.0075849	0.0393955	gins2	protein_coding
ENSDARG00000026325	1.30877	0.00390872	0.0233246	mmp11a	protein_coding
ENSDARG00000017982	1.30828	2.43713e-11	1.53401e-09	cyp39a1	protein_coding
ENSDARG00000092290	1.30719	0.00107706	0.00830899	si:dkeyp-26a9.2	protein_coding
ENSDARG00000087012	1.30669	0.00913417	0.0454404	BX004816.2	protein_coding
ENSDARG00000057231	1.30566	1.21353e-21	2.84631e-19	rorca	protein_coding
ENSDARG00000094606	1.30477	2.99813e-06	5.78393e-05	si:zfos-364h11.2	protein_coding
ENSDARG00000089463	1.29948	6.93777e-06	0.000120186	dhx58	protein_coding
ENSDARG00000039020	1.29519	0.00818742	0.0417757	fbxo5	protein_coding
ENSDARG00000061222	1.29419	0.000215631	0.00218693	uba7	protein_coding
ENSDARG00000100019	1.29297	0.000539093	0.00469405	arhgap11a	protein_coding
ENSDARG00000104045	1.2918	0.00303629	0.0190899	tlr22	protein_coding
ENSDARG00000054340	1.28994	6.47958e-08	1.94056e-06	sla1	protein_coding
ENSDARG00000077103	1.28752	0.000278	0.00270227	sema4aa	protein_coding
ENSDARG00000055271	1.28685	0.00810052	0.0414266	nkd2a	protein_coding
ENSDARG00000027867	1.28654	0.00544845	0.0305019	paplna	protein_coding
ENSDARG00000031243	1.28594	0.00302576	0.0190451	snai3	protein_coding
ENSDARG00000041911	1.28536	0.00210536	0.0142545	si:ch211-245h14.1	protein_coding
ENSDARG00000024815	1.28485	0.00138078	0.0101944	ogfrl2	protein_coding
ENSDARG00000104325	1.28457	2.34739e-05	0.00033876	plek	protein_coding
ENSDARG00000074844	1.28373	0.00245848	0.0160786	CABZ01061495.1	protein_coding
ENSDARG00000062049	1.28149	3.83175e-10	1.99951e-08	hmha1b	protein_coding
ENSDARG00000052396	1.27973	0.0099594	0.0485485	pkz	protein_coding
ENSDARG00000053666	1.27954	0.00511814	0.0290554	myb	protein_coding
ENSDARG00000013719	1.279	0.00402608	0.0239097	gtse1	protein_coding
ENSDARG00000102744	1.27798	0.000387097	0.00358938	mgst3a	protein_coding
ENSDARG00000112944	1.27516	0.000481737	0.00428163	LO018564.1	protein_coding
ENSDARG00000015149	1.27513	0.000169345	0.0017818	wasa	protein_coding
ENSDARG00000037598	1.27498	0.00749961	0.0390983	prf1.5	protein_coding
ENSDARG00000019156	1.27371	0.00735618	0.0385037	haus5	protein_coding
ENSDARG00000111165	1.27345	3.61805e-07	8.88834e-06	CR762436.2	protein_coding
ENSDARG00000024540	1.27305	1.48896e-07	4.11625e-06	tspan36	protein_coding
ENSDARG00000052515	1.2728	0.000257136	0.00253855	calcoco2	protein_coding
ENSDARG00000054911	1.27	0.000539929	0.00469949	tmsb	protein_coding
ENSDARG00000023584	1.26993	0.00502151	0.0286308	cdc7	protein_coding
ENSDARG00000004713	1.26874	0.00876648	0.0440241	mad2l1	protein_coding
ENSDARG00000005462	1.26769	0.000599694	0.00511381	kif4	protein_coding
ENSDARG00000071251	1.26211	0.00804448	0.0411778	ppp1r18	protein_coding
ENSDARG00000056407	1.25682	3.7252e-06	6.99873e-05	irf8	protein_coding
ENSDARG00000012600	1.25135	0.000566775	0.00488215	HELZ2	protein_coding
ENSDARG00000095909	1.24996	0.00423237	0.0249486	BX539325.1	processed_transcript
ENSDARG00000074691	1.24953	0.000495896	0.00438648	mms22l	protein_coding
ENSDARG00000105408	1.249	0.00967942	0.047511	BX248082.1	antisense
ENSDARG00000086550	1.24615	0.00510552	0.0289911	dbf4b	protein_coding
ENSDARG00000079009	1.24507	2.0719e-10	1.14914e-08	abca1b	protein_coding
ENSDARG00000091756	1.24486	1.09544e-08	3.99487e-07	insm1a	protein_coding
ENSDARG00000077618	1.24477	1.86592e-07	5.01511e-06	rin3	protein_coding
ENSDARG00000074754	1.24247	0.00885009	0.044334	si:dkey-188i13.9	protein_coding
ENSDARG00000057738	1.24206	3.29555e-12	2.40759e-10	hells	protein_coding
ENSDARG00000067723	1.24157	0.000230087	0.00230625	tank	protein_coding
ENSDARG00000016065	1.24031	0.00177363	0.0124121	tlr3	protein_coding
ENSDARG00000093024	1.23692	0.000158241	0.00168302	si:ch211-213a13.2	protein_coding
ENSDARG00000053027	1.23675	0.00207221	0.0140814	si:dkey-33i11.1	protein_coding
ENSDARG00000103317	1.23074	2.85519e-05	0.000401384	capn5a	protein_coding
ENSDARG00000069548	1.22924	6.6064e-15	7.25142e-13	zgc:162780	protein_coding
ENSDARG00000098733	1.22612	7.90332e-29	3.20185e-26	pxdn	protein_coding
ENSDARG00000101169	1.22512	0.0011088	0.00849305	grap2b	protein_coding
ENSDARG00000026224	1.22416	0.0018532	0.0128586	fanci	protein_coding
ENSDARG00000038882	1.22331	2.00415e-08	6.79702e-07	smc4	protein_coding
ENSDARG00000026577	1.22188	0.000341528	0.00322956	cdk2	protein_coding
ENSDARG00000096554	1.22171	9.61327e-06	0.000160217	si:dkey-25o16.4	protein_coding
ENSDARG00000101209	1.21723	4.86976e-06	8.80746e-05	lamb1a	protein_coding
ENSDARG00000008388	1.21691	3.86508e-13	3.28709e-11	mmp14b	protein_coding
ENSDARG00000036308	1.21344	8.48028e-08	2.46359e-06	nod1	protein_coding
ENSDARG00000055226	1.21262	8.07546e-09	3.02925e-07	slc7a7	protein_coding
ENSDARG00000103892	1.21195	0.000536222	0.0046718	CABZ01074203.1	protein_coding
ENSDARG00000078119	1.21187	0.00072141	0.00597119	sh3bp1	protein_coding
ENSDARG00000044491	1.21136	0.000581974	0.00498735	kif20a	protein_coding
ENSDARG00000053124	1.20647	0.00407689	0.0241471	si:dkey-148a17.6	protein_coding
ENSDARG00000051962	1.20253	2.31254e-09	9.89022e-08	mmp15a	protein_coding
ENSDARG00000058260	1.20225	4.07564e-06	7.56779e-05	cip2a	protein_coding
ENSDARG00000055128	1.20202	0.000137638	0.00149166	armc4	protein_coding
ENSDARG00000010591	1.20153	0.000672541	0.00565067	foxn4	protein_coding
ENSDARG00000062222	1.20152	6.15696e-05	0.000763861	mxra8a	protein_coding
ENSDARG00000045589	1.20149	0.00638469	0.03433	kcnj8	protein_coding
ENSDARG00000075314	1.20109	1.57979e-09	7.08267e-08	zgc:174906	protein_coding
ENSDARG00000074082	1.19959	0.000803693	0.00655486	gpc5c	protein_coding
ENSDARG00000014943	1.19892	0.00824089	0.0419615	kif23	protein_coding
ENSDARG00000020235	1.1986	4.73882e-10	2.40525e-08	sept9a	protein_coding
ENSDARG00000077414	1.19447	0.00016038	0.00170089	zgc:194312	protein_coding
ENSDARG00000016505	1.19336	0.00026624	0.00260992	apbb1ip	protein_coding
ENSDARG00000002235	1.19122	0.00509582	0.0289462	mmp14a	protein_coding
ENSDARG00000040110	1.19034	5.11151e-07	1.20269e-05	kif20bb	protein_coding
ENSDARG00000092170	1.18869	7.46363e-08	2.20563e-06	apoc1	protein_coding
ENSDARG00000071662	1.18863	8.96191e-05	0.00104404	si:rp71-36a1.3	protein_coding
ENSDARG00000002582	1.18741	0.00347984	0.0212957	tbx15	protein_coding
ENSDARG00000037961	1.18673	0.00142614	0.0104771	rcn3	protein_coding
ENSDARG00000021086	1.18651	0.00258732	0.0167687	znf367	protein_coding
ENSDARG00000055607	1.18567	2.52258e-09	1.06455e-07	cgna	protein_coding
ENSDARG00000093686	1.18299	4.87997e-05	0.00062845	si:rp71-36a1.2	protein_coding
ENSDARG00000097952	1.18181	0.003578	0.0217649	si:ch211-284e13.14	protein_coding
ENSDARG00000104367	1.17848	0.00067567	0.00567154	zgc:194469	protein_coding
ENSDARG00000089004	1.17719	0.00239161	0.0157383	si:ch211-207e14.4	protein_coding
ENSDARG00000071491	1.17356	0.000163611	0.0017294	nrros	protein_coding
ENSDARG00000018553	1.1731	5.14054e-06	9.24468e-05	ifih1	protein_coding
ENSDARG00000074283	1.17278	9.9391e-09	3.66054e-07	inpp5d	protein_coding
ENSDARG00000099980	1.17024	0.00190792	0.0131511	bpifcl	protein_coding
ENSDARG00000098350	1.17016	8.64615e-17	1.31057e-14	mxd3	protein_coding
ENSDARG00000062187	1.16807	0.0016763	0.0119025	kif14	protein_coding
ENSDARG00000081082	1.16541	0.00105018	0.00815053	RF00190	snoRNA
ENSDARG00000077220	1.16537	0.000251452	0.00249126	si:ch211-208f21.3	protein_coding
ENSDARG00000040251	1.16532	0.00030512	0.00292743	ctsk	protein_coding
ENSDARG00000098099	1.1644	0.00969008	0.0475268	zgc:64065	protein_coding
ENSDARG00000076228	1.16436	0.00208903	0.0141655	kif2c	protein_coding
ENSDARG00000010878	1.1643	0.0025457	0.016566	cdkn1ca	protein_coding
ENSDARG00000062817	1.16314	0.00325234	0.0201581	crym	protein_coding
ENSDARG00000032264	1.15942	1.23271e-06	2.60354e-05	mybl2b	protein_coding
ENSDARG00000095830	1.15913	0.00651325	0.0348698	serpinb1l1	protein_coding
ENSDARG00000041041	1.1563	0.000239258	0.00238317	cxcr3.2	protein_coding
ENSDARG00000044694	1.15603	5.70629e-07	1.32999e-05	fybb	protein_coding
ENSDARG00000096850	1.1556	8.19225e-14	7.51192e-12	BX957346.1	lincRNA
ENSDARG00000069989	1.15383	0.000140506	0.00151776	bnc2	protein_coding
ENSDARG00000053215	1.15373	0.00633135	0.0341256	me1	protein_coding
ENSDARG00000035732	1.15285	4.66394e-24	1.26734e-21	arntl1b	protein_coding
ENSDARG00000034559	1.15233	0.00516779	0.0292552	srpx2	protein_coding
ENSDARG00000000906	1.152	0.000438789	0.00397282	skap2	protein_coding
ENSDARG00000036057	1.14804	2.59145e-05	0.000368023	tradd	protein_coding
ENSDARG00000077029	1.1462	0.001171	0.00889305	bub1	protein_coding
ENSDARG00000036993	1.14382	1.30974e-07	3.66628e-06	erbb3b	protein_coding
ENSDARG00000056379	1.14335	4.50824e-05	0.000587443	si:ch73-86n18.1	protein_coding
ENSDARG00000028618	1.14296	6.32665e-08	1.90243e-06	zgc:77517	protein_coding
ENSDARG00000074321	1.14203	0.000839698	0.00678816	tead3a	protein_coding
ENSDARG00000002165	1.14148	4.58405e-08	1.41864e-06	psme1	protein_coding
ENSDARG00000102470	1.13657	2.74307e-07	6.96141e-06	mpp7a	protein_coding
ENSDARG00000009534	1.13371	3.4141e-09	1.4007e-07	wls	protein_coding
ENSDARG00000002748	1.13275	0.000687673	0.00575177	sema6d	protein_coding
ENSDARG00000024278	1.1325	0.000317055	0.00302682	adh8b	protein_coding
ENSDARG00000090537	1.13249	7.48973e-07	1.67894e-05	ifit11	protein_coding
ENSDARG00000097789	1.13106	0.00170878	0.0120643	pon3.2	protein_coding
ENSDARG00000070584	1.13064	0.00804361	0.0411778	clic5b	protein_coding
ENSDARG00000060394	1.13047	0.00803766	0.0411778	mtfr2	protein_coding
ENSDARG00000092651	1.12889	0.00447468	0.026135	si:dkey-57a22.11	protein_coding
ENSDARG00000044457	1.12879	0.00862126	0.0434318	gfi1ab	protein_coding
ENSDARG00000095643	1.12854	0.00777167	0.0402063	si:dkey-253d23.3	protein_coding
ENSDARG00000090444	1.12852	0.00575431	0.0317921	ponzr1	protein_coding
ENSDARG00000100461	1.12836	0.000361726	0.00338797	CABZ01078737.1	protein_coding
ENSDARG00000004588	1.12738	1.17708e-50	1.5428e-47	sox4a	protein_coding
ENSDARG00000076386	1.12574	0.000105504	0.00119393	epdl1	protein_coding
ENSDARG00000099444	1.12548	0.000181314	0.00189318	znf1122	protein_coding
ENSDARG00000099124	1.12491	2.37118e-18	4.26086e-16	f3a	protein_coding
ENSDARG00000035578	1.12279	1.20607e-17	2.00549e-15	hs3st1l2	protein_coding
ENSDARG00000077620	1.12204	0.000391012	0.00361816	cdca7a	protein_coding
ENSDARG00000015998	1.11988	0.000104251	0.00118275	wdhd1	protein_coding
ENSDARG00000090890	1.11981	4.22912e-11	2.56069e-09	cmklr1	protein_coding
ENSDARG00000045299	1.11965	0.0022599	0.0150899	vmo1b	protein_coding
ENSDARG00000098534	1.11858	0.00943226	0.0466111	RF00067	snoRNA
ENSDARG00000056473	1.11805	0.000821933	0.00667188	chaf1b	protein_coding
ENSDARG00000026350	1.11734	0.000316164	0.00301962	wasb	protein_coding
ENSDARG00000016188	1.11524	4.52944e-07	1.08289e-05	si:ch73-63e15.2	protein_coding
ENSDARG00000095455	1.11428	0.00991529	0.0483759	si:dkey-20i20.10	protein_coding
ENSDARG00000039412	1.11344	9.22858e-07	2.01995e-05	dmrta2	protein_coding
ENSDARG00000031506	1.11293	2.526e-07	6.5144e-06	flvcr2b	protein_coding
ENSDARG00000009702	1.11287	0.00609005	0.0332024	ascl1b	protein_coding
ENSDARG00000070029	1.11275	0.00187017	0.0129484	ehhadh	protein_coding
ENSDARG00000060263	1.1108	2.01536e-07	5.34599e-06	pecam1	protein_coding
ENSDARG00000034975	1.11074	0.00172841	0.0121534	gpr157	protein_coding
ENSDARG00000105352	1.1069	2.59757e-07	6.68349e-06	CU459186.6	protein_coding
ENSDARG00000058471	1.10585	0.00054655	0.00474222	plk1	protein_coding
ENSDARG00000016939	1.10579	3.14735e-09	1.30352e-07	itgb2	protein_coding
ENSDARG00000102583	1.10513	0.00279778	0.0178676	il4r.2	protein_coding
ENSDARG00000089564	1.10396	0.00831292	0.0422029	MDFI	protein_coding
ENSDARG00000024209	1.10391	1.28593e-06	2.70057e-05	wasf2	protein_coding
ENSDARG00000098650	1.1022	0.000253307	0.00250853	iqgap3	protein_coding
ENSDARG00000042708	1.10166	4.55297e-08	1.41098e-06	tuba8l	protein_coding
ENSDARG00000094451	1.10164	1.66998e-09	7.42726e-08	cfp	protein_coding
ENSDARG00000039007	1.10087	4.17547e-09	1.67034e-07	eno3	protein_coding
ENSDARG00000023188	1.09869	5.87207e-08	1.7803e-06	lcp1	protein_coding
ENSDARG00000070822	1.09552	1.47366e-19	2.90585e-17	cnp	protein_coding
ENSDARG00000091381	1.09531	0.00622099	0.0337266	si:ch211-214c20.1	protein_coding
ENSDARG00000017744	1.09514	2.99511e-05	0.000417368	smc2	protein_coding
ENSDARG00000002701	1.09431	1.19596e-09	5.55175e-08	rasl12	protein_coding
ENSDARG00000037408	1.09339	0.00170719	0.0120607	tbc1d10c	protein_coding
ENSDARG00000031848	1.08875	1.26149e-05	0.000199492	pparg	protein_coding
ENSDARG00000068096	1.08679	6.65948e-15	7.27385e-13	atf5a	protein_coding
ENSDARG00000030867	1.08557	1.13147e-05	0.000182691	opn7c	protein_coding
ENSDARG00000090156	1.08312	0.00229218	0.0152379	pttg1ipa	protein_coding
ENSDARG00000105376	1.08091	0.000625595	0.00530625	HIST1H4D	protein_coding
ENSDARG00000068233	1.08064	0.00030949	0.00296604	zgc:64051	protein_coding
ENSDARG00000098365	1.08056	0.00287295	0.0182245	lrrc74b	protein_coding
ENSDARG00000083378	1.08025	0.00207308	0.0140831	RF00092	snoRNA
ENSDARG00000103860	1.08009	0.00140426	0.0103505	wu:fu71h07	protein_coding
ENSDARG00000011890	1.07933	5.82636e-10	2.90432e-08	cry4	protein_coding
ENSDARG00000103405	1.07919	0.0100507	0.0488235	znf1102	protein_coding
ENSDARG00000045959	1.07687	0.00028352	0.00274788	csf3r	protein_coding
ENSDARG00000070497	1.07581	0.00362283	0.0219531	bicc1b	protein_coding
ENSDARG00000077120	1.07562	0.00140619	0.0103518	arid5a	protein_coding
ENSDARG00000104960	1.07464	0.00163249	0.0116737	si:ch211-11n16.3	protein_coding
ENSDARG00000027112	1.07423	4.52029e-06	8.26292e-05	ephb4b	protein_coding
ENSDARG00000113107	1.07232	0.0045539	0.0264314	CABZ01085275.1	protein_coding
ENSDARG00000011876	1.07129	4.15342e-05	0.00054989	ednraa	protein_coding
ENSDARG00000101441	1.07045	2.40997e-07	6.22236e-06	lima1a	protein_coding
ENSDARG00000005789	1.06963	0.00328989	0.02034	enpp1	protein_coding
ENSDARG00000027063	1.06617	5.40719e-12	3.81275e-10	arpc1b	protein_coding
ENSDARG00000030999	1.0655	0.00401157	0.0238426	mybl1	protein_coding
ENSDARG00000016725	1.06032	0.000542412	0.00471374	gadd45gb.1	protein_coding
ENSDARG00000010408	1.05769	2.60076e-07	6.68399e-06	igsf9b	protein_coding
ENSDARG00000087554	1.05765	0.00120936	0.00914074	cdk1	protein_coding
ENSDARG00000028295	1.05708	0.000447942	0.00403141	mkrn4	protein_coding
ENSDARG00000056910	1.05643	0.00803177	0.0411695	CU234171.1	protein_coding
ENSDARG00000103868	1.05638	0.00198142	0.0135554	e2f1	protein_coding
ENSDARG00000103854	1.0555	0.00190542	0.0131511	pdlim7	protein_coding
ENSDARG00000093357	1.05471	2.49206e-15	3.03432e-13	nyap2b	protein_coding
ENSDARG00000105193	1.05268	0.00630521	0.0340317	BX927404.1	sense_intronic
ENSDARG00000043403	1.05237	2.02343e-06	4.05085e-05	paox1	protein_coding
ENSDARG00000071578	1.05064	0.00542742	0.0304236	si:ch211-222k6.3	protein_coding
ENSDARG00000067797	1.05035	1.64971e-07	4.50862e-06	spi1a	protein_coding
ENSDARG00000026820	1.05012	2.63501e-10	1.42163e-08	gucy2d	protein_coding
ENSDARG00000053853	1.04941	0.000455759	0.00408661	slc13a2	protein_coding
ENSDARG00000114825	1.0493	0.000100226	0.00114466	CABZ01077124.1	protein_coding
ENSDARG00000037895	1.04782	2.22906e-05	0.000324414	ramp2	protein_coding
ENSDARG00000104472	1.04752	0.00867239	0.0436696	si:ch211-39i2.2	antisense
ENSDARG00000097019	1.04626	1.26681e-05	0.000199908	dhrs13b	protein_coding
ENSDARG00000014685	1.04625	1.17331e-05	0.000187544	esco2	protein_coding
ENSDARG00000101707	1.04553	0.00208301	0.0141333	si:ch211-156b7.4	protein_coding
ENSDARG00000007097	1.04381	9.75818e-06	0.000162141	her13	protein_coding
ENSDARG00000014180	1.04373	6.48362e-07	1.4863e-05	ildr2	protein_coding
ENSDARG00000100693	1.04255	4.09373e-05	0.000542955	ddr2a	protein_coding
ENSDARG00000031647	1.04115	0.0066688	0.0354979	stat2	protein_coding
ENSDARG00000117671	1.03827	0.00267141	0.0172086	BX663525.2	lincRNA
ENSDARG00000110291	1.03806	4.73217e-06	8.57952e-05	CABZ01044731.1	protein_coding
ENSDARG00000089390	1.03804	0.00320605	0.0199156	pnpla2	protein_coding
ENSDARG00000074079	1.03694	0.00755061	0.0392815	si:dkey-3d4.3	protein_coding
ENSDARG00000096689	1.0356	0.00800548	0.041082	si:dkey-66i24.9	protein_coding
ENSDARG00000105575	1.03503	0.00312231	0.0194932	si:dkey-6n21.12	protein_coding
ENSDARG00000074869	1.0348	0.000518479	0.00454833	si:ch1073-291c23.2	protein_coding
ENSDARG00000076733	1.03466	0.00166646	0.0118557	bard1	protein_coding
ENSDARG00000097530	1.03418	0.00126404	0.00947052	xkr5b	protein_coding
ENSDARG00000043322	1.03418	0.00865743	0.0436042	gsx2	protein_coding
ENSDARG00000112644	1.03391	5.80314e-05	0.00072535	CU459056.1	protein_coding
ENSDARG00000069044	1.03348	6.81613e-08	2.03044e-06	agpat4	protein_coding
ENSDARG00000068432	1.03242	5.04792e-11	3.01549e-09	si:dkey-56m19.5	protein_coding
ENSDARG00000010791	1.03214	1.78872e-07	4.8428e-06	dla	protein_coding
ENSDARG00000006791	1.03002	4.92083e-22	1.2049e-19	arntl1a	protein_coding
ENSDARG00000040917	1.02978	6.29122e-05	0.00077835	cbfb	protein_coding
ENSDARG00000063313	1.02954	5.41063e-05	0.000684609	plbd1	protein_coding
ENSDARG00000011094	1.02943	0.000122197	0.0013506	ccna2	protein_coding
ENSDARG00000042977	1.02462	1.9052e-17	3.11547e-15	nfil3	protein_coding
ENSDARG00000081931	1.02454	0.000325083	0.00309419	RF00190	snoRNA
ENSDARG00000031240	1.02444	0.000205526	0.00210167	kidins220a	protein_coding
ENSDARG00000030156	1.02355	4.51225e-05	0.000587621	naglu	protein_coding
ENSDARG00000086457	1.02284	7.00057e-05	0.000845915	tnfaip8l1	protein_coding
ENSDARG00000102483	1.0226	0.000117098	0.00130459	wu:fb44b02	protein_coding
ENSDARG00000071113	1.02118	0.000278951	0.00270714	xirp2a	protein_coding
ENSDARG00000091111	1.02067	2.00627e-05	0.00029743	si:ch211-15b10.6	protein_coding
ENSDARG00000117155	1.01463	0.00539587	0.030323	BX323087.1	protein_coding
ENSDARG00000038386	1.01459	2.18711e-06	4.33955e-05	ascl1a	protein_coding
ENSDARG00000004049	1.01193	5.58179e-13	4.6757e-11	marcksa	protein_coding
ENSDARG00000035809	1.01078	3.94497e-06	7.3558e-05	col1a1b	protein_coding
ENSDARG00000077130	1.01066	0.00417247	0.0246477	bcl10	protein_coding
ENSDARG00000078114	1.01025	8.39278e-06	0.000141995	cfp	protein_coding
ENSDARG00000060917	1.00923	6.55436e-06	0.000114186	anln	protein_coding
ENSDARG00000010948	1.00763	0.0003848	0.00357106	kif11	protein_coding
ENSDARG00000040492	1.00672	5.96834e-06	0.000105045	mthfd1b	protein_coding
ENSDARG00000056722	1.00642	2.18191e-21	4.96095e-19	cd99l2	protein_coding
ENSDARG00000000730	1.00606	3.10717e-13	2.66285e-11	slc6a22.1	protein_coding
ENSDARG00000040036	1.00604	0.000578624	0.00496454	tcf19l	protein_coding
ENSDARG00000053744	1.00577	0.00464047	0.0268268	dcdc2b	protein_coding
ENSDARG00000033042	1.00404	0.000184698	0.0019231	ptprja	protein_coding
ENSDARG00000019815	1.00256	1.83031e-05	0.000274819	fn1a	protein_coding
ENSDARG00000038822	1.00162	7.98918e-16	1.05334e-13	mrc1b	protein_coding
ENSDARG00000026348	1.00156	0.000220611	0.00223134	csad	protein_coding
ENSDARG00000078912	1.00134	0.000159564	0.00169548	si:ch73-24k9.2	protein_coding
ENSDARG00000091699	1.001	4.26609e-08	1.33883e-06	capn2a	protein_coding
ENSDARG00000090234	1.00081	0.00977059	0.047848	bmf1	protein_coding
ENSDARG00000037738	1.00032	0.000839951	0.00678816	fbxl3l	protein_coding
ENSDARG00000075565	1.00005	3.13405e-09	1.30043e-07	lzts1	protein_coding
ENSDARG00000089162	0.999643	0.00123355	0.00928579	afap1l1a	protein_coding
ENSDARG00000069114	0.998032	0.000101977	0.0011605	unc93b1	protein_coding
ENSDARG00000090472	0.99801	0.00972923	0.0476978	ttll10	protein_coding
ENSDARG00000037782	0.997667	0.00711556	0.0374112	sox8b	protein_coding
ENSDARG00000075707	0.997134	1.20719e-05	0.000191722	nid2a	protein_coding
ENSDARG00000054537	0.996441	5.91948e-12	4.14773e-10	nhsl1a	protein_coding
ENSDARG00000078924	0.995183	0.000102925	0.0011695	tmco4	protein_coding
ENSDARG00000013274	0.995107	0.00429385	0.0252035	eif4eb	protein_coding
ENSDARG00000013607	0.994147	7.71663e-16	1.02959e-13	sema3gb	protein_coding
ENSDARG00000088616	0.992897	0.001147	0.00872866	si:ch211-152l15.2	protein_coding
ENSDARG00000076251	0.992304	0.00566459	0.031382	irf3	protein_coding
ENSDARG00000098153	0.991591	0.000867595	0.00696639	lhfpl2b	protein_coding
ENSDARG00000016470	0.991143	0.00454458	0.026396	anxa5b	protein_coding
ENSDARG00000056985	0.989975	0.000831502	0.0067384	tpte	protein_coding
ENSDARG00000058647	0.989763	0.000100907	0.00115126	hck	protein_coding
ENSDARG00000112045	0.989511	8.15038e-10	3.92239e-08	AXL	protein_coding
ENSDARG00000079267	0.988568	0.00211743	0.0142971	FERMT3 (1 of many)	protein_coding
ENSDARG00000018643	0.988216	3.49977e-05	0.000473191	igf2a	protein_coding
ENSDARG00000006921	0.987625	4.02186e-08	1.26934e-06	lrp5	protein_coding
ENSDARG00000069461	0.987622	0.00190605	0.0131511	rnaseka	protein_coding
ENSDARG00000057241	0.986757	0.000118523	0.00131717	tnfsf10	protein_coding
ENSDARG00000002479	0.984626	1.75668e-05	0.000265191	ercc6l	protein_coding
ENSDARG00000063612	0.983186	6.99608e-05	0.000845831	antxr1c	protein_coding
ENSDARG00000006288	0.980195	0.000349672	0.00329167	prdm5	protein_coding
ENSDARG00000026052	0.979881	0.00999936	0.0486688	ccdc3a	protein_coding
ENSDARG00000080823	0.979022	3.6082e-08	1.15183e-06	RF00045	snoRNA
ENSDARG00000044246	0.97808	0.00186149	0.0129013	snx18b	protein_coding
ENSDARG00000074846	0.977622	0.000404542	0.00371865	si:dkeyp-68b7.12	protein_coding
ENSDARG00000077116	0.977162	4.24787e-07	1.02311e-05	ccnjl	protein_coding
ENSDARG00000042285	0.977113	0.0050963	0.0289462	atp8b3	protein_coding
ENSDARG00000089852	0.976955	0.00211654	0.0142971	si:dkey-51d8.1	protein_coding
ENSDARG00000103766	0.975979	3.67271e-10	1.92554e-08	cyp2aa7	protein_coding
ENSDARG00000055753	0.975592	0.01035	0.0499067	suv39h1b	protein_coding
ENSDARG00000086421	0.973461	0.00123355	0.00928579	si:ch211-212k18.8	protein_coding
ENSDARG00000041959	0.973256	2.47526e-08	8.21963e-07	cxcr4b	protein_coding
ENSDARG00000029720	0.973034	0.00201333	0.0137442	si:dkeyp-9d4.2	protein_coding
ENSDARG00000101675	0.972796	0.000790127	0.0064679	zgc:123107	protein_coding
ENSDARG00000103754	0.971928	0.00024062	0.00239566	aspm	protein_coding
ENSDARG00000062040	0.969112	7.695e-05	0.00091543	atp8b5a	protein_coding
ENSDARG00000016154	0.968858	2.35113e-11	1.48889e-09	zfp36l1a	protein_coding
ENSDARG00000112234	0.968701	0.000713766	0.00591892	endouc	protein_coding
ENSDARG00000060312	0.96772	1.73289e-06	3.5198e-05	wdr62	protein_coding
ENSDARG00000040290	0.967563	0.00101808	0.00794568	pon3.2	protein_coding
ENSDARG00000017676	0.967413	2.09784e-06	4.19229e-05	mmp2	protein_coding
ENSDARG00000038010	0.967353	0.000795874	0.00650061	rac2	protein_coding
ENSDARG00000101919	0.966737	0.000690045	0.00576729	foxj1a	protein_coding
ENSDARG00000038669	0.966195	0.007419	0.0387415	gbp2	protein_coding
ENSDARG00000101030	0.966185	0.000750799	0.00619374	si:ch73-158p21.3	protein_coding
ENSDARG00000076574	0.966077	0.00352749	0.0215224	si:ch211-171h4.6	protein_coding
ENSDARG00000062152	0.965707	0.000939159	0.00742596	chaf1a	protein_coding
ENSDARG00000018266	0.96476	0.00151646	0.0110029	mthfd1a	protein_coding
ENSDARG00000032469	0.964488	4.6076e-05	0.000597594	ampd3b	protein_coding
ENSDARG00000012942	0.962304	1.98508e-25	6.05913e-23	itgb5	protein_coding
ENSDARG00000034773	0.961464	0.000169747	0.00178397	ncapd3	protein_coding
ENSDARG00000101628	0.961185	0.00206148	0.0140256	ascl1b	protein_coding
ENSDARG00000035553	0.96076	0.00823736	0.0419615	cx27.5	protein_coding
ENSDARG00000069335	0.959172	3.1766e-05	0.000436112	bcl6b	protein_coding
ENSDARG00000088672	0.959014	7.12274e-07	1.60962e-05	zmp:0000000936	protein_coding
ENSDARG00000102762	0.957056	0.00594722	0.0326313	pik3r5	protein_coding
ENSDARG00000074599	0.955822	2.06257e-10	1.14895e-08	frmd4ba	protein_coding
ENSDARG00000026070	0.955707	7.62197e-06	0.000130741	cd82b	protein_coding
ENSDARG00000055290	0.955137	8.21088e-05	0.000968527	mpeg1.1	protein_coding
ENSDARG00000078979	0.951052	1.662e-07	4.5217e-06	arhgef40	protein_coding
ENSDARG00000103399	0.950327	0.00340243	0.0208966	zgc:63569	protein_coding
ENSDARG00000029795	0.947613	0.0102896	0.0496799	fam213b	protein_coding
ENSDARG00000062519	0.946939	8.3347e-05	0.000981573	abcc13	protein_coding
ENSDARG00000075482	0.944587	3.49865e-05	0.000473191	zgc:173587	protein_coding
ENSDARG00000092976	0.942929	6.96706e-06	0.000120528	si:ch211-127i16.2	protein_coding
ENSDARG00000073684	0.942916	4.53604e-11	2.73168e-09	quo	protein_coding
ENSDARG00000052402	0.942741	1.94994e-08	6.63338e-07	dnmt3ba	protein_coding
ENSDARG00000016527	0.942537	0.0069375	0.0367043	helz2	protein_coding
ENSDARG00000077474	0.941958	3.49085e-06	6.60298e-05	pla2r1	protein_coding
ENSDARG00000016427	0.941873	0.000383222	0.00356384	fignl1	protein_coding
ENSDARG00000100731	0.941345	0.00505324	0.0287749	zgc:101540	protein_coding
ENSDARG00000079327	0.940429	1.65658e-10	9.36852e-09	hmcn2	protein_coding
ENSDARG00000078249	0.939538	0.00192897	0.0132634	unc13d	protein_coding
ENSDARG00000103744	0.939529	0.00178774	0.0124968	hacd1	protein_coding
ENSDARG00000058903	0.938894	0.00210935	0.0142642	si:ch211-237c6.4	protein_coding
ENSDARG00000054438	0.938208	2.02775e-08	6.8562e-07	fzd2	protein_coding
ENSDARG00000053159	0.937774	0.00548715	0.0306351	zgc:110626	protein_coding
ENSDARG00000006677	0.936519	0.000316163	0.00301962	ripk1l	protein_coding
ENSDARG00000053558	0.935136	0.00597908	0.0327497	rtkn2a	protein_coding
ENSDARG00000055713	0.934631	0.000192407	0.00199591	fmnl1a	protein_coding
ENSDARG00000060753	0.934531	6.74289e-07	1.54098e-05	pear1	protein_coding
ENSDARG00000093931	0.934317	1.48027e-08	5.20243e-07	rflnb	protein_coding
ENSDARG00000100946	0.934162	0.00154206	0.0111414	si:ch211-212k18.9	protein_coding
ENSDARG00000023768	0.933945	0.00292536	0.0184969	mfsd4aa	protein_coding
ENSDARG00000100383	0.932265	0.000910089	0.00723719	il10ra	protein_coding
ENSDARG00000068858	0.9321	0.00086635	0.00695891	il2rga	protein_coding
ENSDARG00000003854	0.931558	0.000535058	0.00466439	acsl1b	protein_coding
ENSDARG00000040725	0.931142	0.000641844	0.00542137	zgc:114130	protein_coding
ENSDARG00000104255	0.929149	1.02971e-20	2.29441e-18	arhgap27	protein_coding
ENSDARG00000008540	0.928471	1.57157e-07	4.32851e-06	sox21b	protein_coding
ENSDARG00000036456	0.926532	0.00472709	0.027252	anxa4	protein_coding
ENSDARG00000063649	0.925572	1.78729e-05	0.000269083	tead3b	protein_coding
ENSDARG00000100348	0.925479	0.00296071	0.018678	si:dkey-71l4.1	protein_coding
ENSDARG00000060012	0.925469	0.0005005	0.0044237	f2r	protein_coding
ENSDARG00000010008	0.92503	6.95021e-07	1.57703e-05	vim	protein_coding
ENSDARG00000071107	0.92405	0.00221665	0.0148501	wnt7bb	protein_coding
ENSDARG00000009313	0.923388	1.37331e-05	0.000213837	zgc:63831	protein_coding
ENSDARG00000071005	0.922725	0.00183844	0.0127734	ppp1r3ca	protein_coding
ENSDARG00000014954	0.921497	1.59678e-07	4.3871e-06	snx33	protein_coding
ENSDARG00000002952	0.91792	2.96507e-05	0.000414217	smo	protein_coding
ENSDARG00000043710	0.917268	7.84279e-08	2.30545e-06	parvaa	protein_coding
ENSDARG00000008811	0.914716	0.00804293	0.0411778	cmtm3	protein_coding
ENSDARG00000101180	0.91182	1.03417e-05	0.000169811	mcm7	protein_coding
ENSDARG00000017437	0.911289	0.00173768	0.0122103	adcy3b	protein_coding
ENSDARG00000112943	0.909758	7.73693e-07	1.7274e-05	adgre5b.3	protein_coding
ENSDARG00000094992	0.909045	3.31396e-09	1.36491e-07	otx1	protein_coding
ENSDARG00000078335	0.907648	7.22277e-17	1.10992e-14	amot	protein_coding
ENSDARG00000102441	0.906891	1.02463e-07	2.92328e-06	ctnna1	protein_coding
ENSDARG00000076144	0.905177	1.13301e-06	2.40894e-05	si:ch211-74m13.3	protein_coding
ENSDARG00000052094	0.905167	7.04373e-17	1.08992e-14	notch1b	protein_coding
ENSDARG00000028275	0.90308	0.00383187	0.02298	sult1st1	protein_coding
ENSDARG00000117781	0.902987	0.000807356	0.00657511	CABZ01073834.1	lincRNA
ENSDARG00000056713	0.901891	2.11013e-06	4.20931e-05	pskh1	protein_coding
ENSDARG00000109046	0.901476	0.00704837	0.0371193	RF00001	rRNA
ENSDARG00000058348	0.900617	0.00639265	0.0343646	scinlb	protein_coding
ENSDARG00000100598	0.898279	0.000391727	0.00362026	CABZ01109081.1	protein_coding
ENSDARG00000094426	0.897033	0.00018791	0.00195472	her4.2	protein_coding
ENSDARG00000078313	0.89701	2.16525e-10	1.19421e-08	MYO9B	protein_coding
ENSDARG00000092025	0.89573	0.00170713	0.0120607	si:dkey-121n8.8	protein_coding
ENSDARG00000010770	0.895676	2.26778e-09	9.71743e-08	sox19a	protein_coding
ENSDARG00000079387	0.895429	0.00489048	0.0280488	si:ch211-102c2.4	protein_coding
ENSDARG00000017905	0.895295	5.09374e-16	7.04961e-14	casp3a	protein_coding
ENSDARG00000043130	0.894892	4.99528e-07	1.17783e-05	notch2	protein_coding
ENSDARG00000073738	0.894232	2.38275e-09	1.01515e-07	dennd2c	protein_coding
ENSDARG00000013794	0.894154	7.82893e-09	2.94669e-07	klf11b	protein_coding
ENSDARG00000104412	0.893933	0.00271164	0.0174123	si:dkey-72l17.5	protein_coding
ENSDARG00000018165	0.893303	0.00675848	0.035881	depdc1a	protein_coding
ENSDARG00000100897	0.893124	1.6155e-09	7.21375e-08	pdgfrb	protein_coding
ENSDARG00000055276	0.890941	7.71964e-05	0.000917381	rel	protein_coding
ENSDARG00000098296	0.890106	3.61313e-07	8.88834e-06	gnsb	protein_coding
ENSDARG00000054023	0.887601	0.00455311	0.0264314	ttll6	protein_coding
ENSDARG00000037238	0.886844	3.44229e-07	8.49402e-06	smad5	protein_coding
ENSDARG00000117786	0.885761	0.0100076	0.0486874	CABZ01072848.1	lincRNA
ENSDARG00000044318	0.885617	0.00743484	0.0387965	itgb7	protein_coding
ENSDARG00000007715	0.885047	0.00982723	0.0480514	lgsn	protein_coding
ENSDARG00000040192	0.884684	0.00596469	0.032687	nenf	protein_coding
ENSDARG00000078155	0.884388	2.39002e-16	3.43578e-14	inavaa	protein_coding
ENSDARG00000087016	0.880764	0.00227812	0.0151707	micall1b.2	protein_coding
ENSDARG00000095733	0.877444	0.000495097	0.00438116	CT573344.2	sense_intronic
ENSDARG00000010252	0.876172	0.00491374	0.0281506	jak3	protein_coding
ENSDARG00000069093	0.875179	0.00159366	0.01144	col2a1a	protein_coding
ENSDARG00000011262	0.874214	0.00372895	0.0224746	traip	protein_coding
ENSDARG00000053186	0.873325	0.000693044	0.00578368	vstm4b	protein_coding
ENSDARG00000091548	0.872847	1.09634e-15	1.39593e-13	stard9	protein_coding
ENSDARG00000077039	0.871985	9.9835e-05	0.00114254	esama	protein_coding
ENSDARG00000044142	0.871546	3.26636e-05	0.000445962	acss1	protein_coding
ENSDARG00000075954	0.87145	0.00041255	0.00377358	serpinh1a	protein_coding
ENSDARG00000071294	0.870979	0.00130139	0.00970145	tonsl	protein_coding
ENSDARG00000097217	0.869246	0.00152135	0.0110168	si:dkey-229e3.2	protein_coding
ENSDARG00000074335	0.868466	1.86812e-07	5.01511e-06	boc	protein_coding
ENSDARG00000104235	0.868166	3.35609e-13	2.86515e-11	myo5c	protein_coding
ENSDARG00000052997	0.867756	0.000475229	0.00423562	sema4e	protein_coding
ENSDARG00000086631	0.866453	0.00385789	0.0230893	rnh1	protein_coding
ENSDARG00000002336	0.866236	0.000685115	0.00573468	dlc	protein_coding
ENSDARG00000088878	0.865579	0.00351748	0.0214789	c1qtnf1	protein_coding
ENSDARG00000000690	0.863929	0.000847912	0.00684288	sypl2b	protein_coding
ENSDARG00000055133	0.863535	0.00843946	0.0427635	cenpf	protein_coding
ENSDARG00000041869	0.86311	2.03956e-05	0.000301363	tnfrsf19	protein_coding
ENSDARG00000096777	0.862577	0.00631695	0.0340727	CCDC189	protein_coding
ENSDARG00000103340	0.861804	0.000160961	0.00170543	clic1	protein_coding
ENSDARG00000039082	0.861737	2.02402e-05	0.000299425	zgc:123010	protein_coding
ENSDARG00000009942	0.861155	0.000198412	0.00204488	cdc6	protein_coding
ENSDARG00000077068	0.860952	0.0056786	0.0314518	si:ch211-11p18.6	protein_coding
ENSDARG00000103676	0.859944	4.87441e-05	0.000628176	si:dkey-90l8.3	protein_coding
ENSDARG00000021677	0.859418	2.18038e-07	5.68225e-06	phf11	protein_coding
ENSDARG00000061600	0.859153	3.38035e-07	8.36899e-06	cemip2	protein_coding
ENSDARG00000036864	0.858516	0.00800131	0.0410759	slc34a2b	protein_coding
ENSDARG00000097057	0.857619	7.80259e-09	2.94322e-07	fxyd6l	protein_coding
ENSDARG00000075964	0.856943	2.662e-07	6.80995e-06	plekhg4	protein_coding
ENSDARG00000099198	0.854568	0.000512762	0.00451336	BX927287.1	pseudogene
ENSDARG00000080612	0.854337	0.00262077	0.0169411	dre-mir-9-2	miRNA
ENSDARG00000077516	0.854262	0.00954867	0.0470403	recql4	protein_coding
ENSDARG00000035521	0.85372	8.39787e-10	4.01548e-08	sfrp1a	protein_coding
ENSDARG00000103054	0.852514	0.000262649	0.00258268	dnm2b	protein_coding
ENSDARG00000103615	0.851626	0.00736653	0.0385489	si:dkey-31j3.11	protein_coding
ENSDARG00000078152	0.851272	0.00329994	0.0203852	si:dkey-56i24.1	protein_coding
ENSDARG00000077811	0.85081	1.4715e-08	5.17979e-07	sox11a	protein_coding
ENSDARG00000017121	0.85062	7.27419e-06	0.000125355	mafba	protein_coding
ENSDARG00000045294	0.849506	4.76067e-08	1.47125e-06	sh3glb1a	protein_coding
ENSDARG00000108038	0.848254	0.00625816	0.0338621	CABZ01109481.1	protein_coding
ENSDARG00000089227	0.847819	3.23785e-06	6.18745e-05	si:ch211-91p5.3	protein_coding
ENSDARG00000117411	0.84706	2.82191e-08	9.30144e-07	CT997819.3	lincRNA
ENSDARG00000074235	0.84651	0.0001275	0.00139674	CR376783.1	protein_coding
ENSDARG00000100280	0.846138	3.78445e-08	1.20293e-06	znfx1	protein_coding
ENSDARG00000014311	0.845037	8.73425e-05	0.00102107	pgghg	protein_coding
ENSDARG00000040080	0.844805	2.0251e-05	0.000299425	fli1b	protein_coding
ENSDARG00000005679	0.843527	0.00105338	0.00816684	trip10a	protein_coding
ENSDARG00000025641	0.843431	1.89414e-05	0.000283828	gli2a	protein_coding
ENSDARG00000076945	0.843053	0.000108643	0.001222	dsg2.1	processed_transcript
ENSDARG00000039871	0.842737	6.80524e-05	0.000827247	rpz4	protein_coding
ENSDARG00000025495	0.842374	4.47118e-05	0.000583936	nhlh2	protein_coding
ENSDARG00000062402	0.841582	1.91158e-05	0.000285859	frem1b	protein_coding
ENSDARG00000105479	0.840969	0.00272607	0.0174949	si:ch211-126c2.4	protein_coding
ENSDARG00000100227	0.840586	3.07044e-07	7.68714e-06	SLC7A1 (1 of many)	protein_coding
ENSDARG00000088805	0.839893	3.21271e-08	1.03898e-06	nes	protein_coding
ENSDARG00000042637	0.839211	0.00663274	0.0353395	tert	protein_coding
ENSDARG00000004372	0.838568	4.38228e-10	2.24991e-08	fmnl3	protein_coding
ENSDARG00000053136	0.836137	3.08078e-10	1.65015e-08	b2m	protein_coding
ENSDARG00000070416	0.835486	3.17309e-05	0.000435898	zgc:162816	protein_coding
ENSDARG00000101823	0.835476	0.00109014	0.00838818	si:ch211-243p7.3	protein_coding
ENSDARG00000069282	0.835418	5.90492e-06	0.000104011	bbc3	protein_coding
ENSDARG00000002826	0.835282	0.0082571	0.0420143	cep57l1	protein_coding
ENSDARG00000068629	0.834627	0.00357224	0.0217445	cd151l	protein_coding
ENSDARG00000034555	0.8345	1.2595e-08	4.51919e-07	pard3bb	protein_coding
ENSDARG00000099518	0.832052	0.00335552	0.0206426	si:ch211-119e14.1	protein_coding
ENSDARG00000008840	0.831601	0.00142318	0.0104588	hmbsa	protein_coding
ENSDARG00000011376	0.831459	0.00811106	0.041471	dnase1l4.2	protein_coding
ENSDARG00000009939	0.831274	0.00562089	0.0311477	micu2	protein_coding
ENSDARG00000020884	0.830656	0.000212236	0.00215826	gli2b	protein_coding
ENSDARG00000071437	0.829036	8.31684e-05	0.000979989	ptprc	protein_coding
ENSDARG00000069074	0.828674	3.54596e-23	9.08172e-21	cry1ba	protein_coding
ENSDARG00000037046	0.828304	0.00157074	0.0113068	rad51b	protein_coding
ENSDARG00000036558	0.827653	0.000156715	0.00167157	col18a1a	protein_coding
ENSDARG00000054609	0.82702	0.000707615	0.00588012	slco2b1	protein_coding
ENSDARG00000004880	0.826508	0.00154977	0.0111817	acsm3	protein_coding
ENSDARG00000055284	0.826	1.46429e-07	4.05811e-06	afap1	protein_coding
ENSDARG00000095184	0.825974	0.000154967	0.0016561	si:ch73-52p7.1	protein_coding
ENSDARG00000102277	0.82586	1.65112e-07	4.50862e-06	lama1	protein_coding
ENSDARG00000068213	0.825694	1.33711e-12	1.05277e-10	fzd10	protein_coding
ENSDARG00000051814	0.825605	5.83796e-13	4.87196e-11	ptprz1a	protein_coding
ENSDARG00000117253	0.825541	0.0014391	0.0105515	BX088707.3	lincRNA
ENSDARG00000057644	0.824278	0.000840219	0.00678816	adam8b	protein_coding
ENSDARG00000078503	0.823108	0.00282897	0.0180204	si:dkey-76b14.2	protein_coding
ENSDARG00000005414	0.822525	0.0094471	0.0466638	grapa	protein_coding
ENSDARG00000095268	0.821981	0.0100961	0.0489897	si:dkey-261h17.1	protein_coding
ENSDARG00000036791	0.821245	1.16182e-09	5.42719e-08	dnmt3bb.1	protein_coding
ENSDARG00000019507	0.819699	0.00034953	0.00329167	mcm5	protein_coding
ENSDARG00000076735	0.819235	3.23387e-05	0.000442339	si:dkey-193c22.2	protein_coding
ENSDARG00000036548	0.819018	8.98587e-05	0.00104555	s1pr2	protein_coding
ENSDARG00000112647	0.81809	0.00277509	0.0177431	si:dkey-108k21.24	protein_coding
ENSDARG00000044001	0.818026	0.0013503	0.0100024	lgals3b	protein_coding
ENSDARG00000103554	0.816547	3.59072e-11	2.19201e-09	notch1a	protein_coding
ENSDARG00000037307	0.816225	0.00377395	0.0227054	gnpda1	protein_coding
ENSDARG00000069376	0.814978	4.66062e-09	1.85112e-07	tnfsf12	protein_coding
ENSDARG00000045626	0.814298	0.00212674	0.0143513	nek8	protein_coding
ENSDARG00000004105	0.813369	2.85099e-08	9.38344e-07	tie1	protein_coding
ENSDARG00000071458	0.812992	0.00210862	0.0142642	si:dkey-121a11.3	protein_coding
ENSDARG00000104117	0.812872	9.85118e-08	2.82866e-06	fzd4	protein_coding
ENSDARG00000117238	0.811826	0.000612867	0.00521018	CU463231.2	lincRNA
ENSDARG00000082242	0.810837	0.000226555	0.00227905	RF00045	snoRNA
ENSDARG00000044541	0.80821	4.89717e-17	7.68442e-15	ppp1r14ba	protein_coding
ENSDARG00000102746	0.807989	0.00101782	0.00794568	tmem39a	protein_coding
ENSDARG00000076189	0.807857	0.000212392	0.00215826	ccdc88b	protein_coding
ENSDARG00000070787	0.806618	3.99765e-07	9.75631e-06	jupa	protein_coding
ENSDARG00000068973	0.805922	6.04518e-10	3.00667e-08	pdlim4	protein_coding
ENSDARG00000070155	0.805609	8.00496e-07	1.77656e-05	tuba8l3	protein_coding
ENSDARG00000036844	0.804996	0.000555088	0.00479956	tsen54	protein_coding
ENSDARG00000090980	0.803651	0.000534627	0.00466427	apof	protein_coding
ENSDARG00000092354	0.80146	1.18009e-05	0.000188223	si:ch211-284e13.6	protein_coding
ENSDARG00000059305	0.800281	0.00230582	0.0153048	tmem37	protein_coding
ENSDARG00000089922	0.799935	0.00489557	0.0280708	dsn1	protein_coding
ENSDARG00000005350	0.799545	4.34747e-26	1.38386e-23	dip2ba	protein_coding
ENSDARG00000055791	0.799033	2.03835e-06	4.07706e-05	zgc:158423	protein_coding
ENSDARG00000042833	0.798267	0.000386823	0.00358834	rffl	protein_coding
ENSDARG00000101689	0.798116	0.00397072	0.0236376	si:dkey-16p6.1	protein_coding
ENSDARG00000103639	0.797926	0.000159854	0.00169705	si:dkey-36i7.3	protein_coding
ENSDARG00000075720	0.79725	0.00803887	0.0411778	il2rb	protein_coding
ENSDARG00000078600	0.797128	0.00473085	0.0272666	ldlrad3	protein_coding
ENSDARG00000087784	0.796471	0.00923755	0.0458319	si:dkeyp-110a12.4	protein_coding
ENSDARG00000117525	0.795796	0.00902536	0.0450399	FQ311924.2	lincRNA
ENSDARG00000027589	0.795701	0.00111253	0.00851479	fzd7b	protein_coding
ENSDARG00000044345	0.793722	1.92683e-10	1.07603e-08	cyfip1	protein_coding
ENSDARG00000056045	0.793027	0.00339766	0.0208788	si:ch73-139e5.4	protein_coding
ENSDARG00000045066	0.792725	2.88e-06	5.57534e-05	entpd1	protein_coding
ENSDARG00000093608	0.792636	3.53092e-09	1.43832e-07	ccl34b.1	protein_coding
ENSDARG00000101249	0.791422	0.00220622	0.0147936	CU459186.3	protein_coding
ENSDARG00000040815	0.791238	5.77193e-05	0.000722935	tsku	protein_coding
ENSDARG00000002196	0.790383	0.000592479	0.00506585	bach1b	protein_coding
ENSDARG00000093677	0.789221	0.000997639	0.00782174	si:ch211-56a11.2	protein_coding
ENSDARG00000102464	0.788522	0.00495723	0.0283296	wnt5b	protein_coding
ENSDARG00000068367	0.786843	7.79606e-05	0.000925476	nfkbie	protein_coding
ENSDARG00000087844	0.786807	0.00804305	0.0411778	plekhn1	protein_coding
ENSDARG00000061357	0.783673	0.00494139	0.0282608	chst6	protein_coding
ENSDARG00000054562	0.782601	0.00994631	0.0485136	her15.1	protein_coding
ENSDARG00000045799	0.781641	0.00019442	0.00201304	acanb	protein_coding
ENSDARG00000086112	0.781561	0.00816682	0.0417178	si:ch211-266i6.3	protein_coding
ENSDARG00000033029	0.781488	4.67883e-05	0.000605422	pkd1b	protein_coding
ENSDARG00000113045	0.781376	0.00479117	0.0275288	CABZ01063543.1	protein_coding
ENSDARG00000090844	0.780693	0.000916988	0.00728425	CABZ01054965.1	protein_coding
ENSDARG00000056184	0.780139	2.56466e-05	0.000365604	dvl2	protein_coding
ENSDARG00000102180	0.779824	0.000261595	0.0025767	shroom3	protein_coding
ENSDARG00000078050	0.779764	0.000351586	0.00330829	phf19	protein_coding
ENSDARG00000020901	0.779109	0.00179925	0.0125677	gabrp	protein_coding
ENSDARG00000059279	0.778747	3.14411e-05	0.000433226	tfap2a	protein_coding
ENSDARG00000004301	0.778361	0.00888183	0.0444431	rhogb	protein_coding
ENSDARG00000037879	0.777302	6.86319e-14	6.3719e-12	lfng	protein_coding
ENSDARG00000042627	0.776767	7.27344e-07	1.63704e-05	nhsl1b	protein_coding
ENSDARG00000061328	0.775702	6.66696e-05	0.00081399	cdon	protein_coding
ENSDARG00000020158	0.774908	0.00238097	0.0156915	spag6	protein_coding
ENSDARG00000052903	0.7745	0.0069989	0.0369548	rtkn2b	protein_coding
ENSDARG00000092162	0.774362	0.00427369	0.0251212	mhc1zaa	protein_coding
ENSDARG00000059442	0.773449	2.63237e-05	0.000372646	smtnb	protein_coding
ENSDARG00000079363	0.772993	0.00209789	0.0142213	lrig3	protein_coding
ENSDARG00000074876	0.772735	5.05743e-05	0.000646899	abcd1	protein_coding
ENSDARG00000010154	0.770342	0.00883121	0.0442594	vstm4a	protein_coding
ENSDARG00000114670	0.769448	0.00151864	0.0110043	ube2c	protein_coding
ENSDARG00000016022	0.767718	0.0054959	0.030659	zic5	protein_coding
ENSDARG00000027222	0.766717	0.000113414	0.00126671	adgrg1	protein_coding
ENSDARG00000057683	0.764639	0.0011954	0.00904753	mcm6	protein_coding
ENSDARG00000042876	0.764466	0.00016557	0.00174763	abracl	protein_coding
ENSDARG00000117044	0.763371	8.53233e-05	0.00100167	RF00001	rRNA
ENSDARG00000017811	0.762585	0.000733148	0.0060571	si:ch211-210c8.6	protein_coding
ENSDARG00000054137	0.762232	0.00352851	0.0215226	adgrg6	protein_coding
ENSDARG00000077249	0.761577	0.000340193	0.00322018	gmip	protein_coding
ENSDARG00000011510	0.761101	9.86133e-10	4.6553e-08	rcc2	protein_coding
ENSDARG00000068784	0.760517	0.00222533	0.0148917	vsir	protein_coding
ENSDARG00000086815	0.760289	1.13821e-06	2.41769e-05	MYADM	protein_coding
ENSDARG00000077842	0.759959	0.00097209	0.00764834	ajuba	protein_coding
ENSDARG00000014003	0.759956	2.07707e-05	0.000306296	stard8	protein_coding
ENSDARG00000052039	0.759704	0.00327161	0.0202495	caspb	protein_coding
ENSDARG00000042900	0.759656	2.95374e-05	0.000412894	gtpbp1l	protein_coding
ENSDARG00000095695	0.759106	0.00667427	0.03551	ms4a17a.10	protein_coding
ENSDARG00000076487	0.759031	0.001321	0.00981479	haao	protein_coding
ENSDARG00000042652	0.758876	1.04269e-07	2.971e-06	rreb1b	protein_coding
ENSDARG00000030364	0.758834	5.32278e-05	0.000675027	angpt1	protein_coding
ENSDARG00000071685	0.75734	2.53442e-13	2.18039e-11	slco5a1a	protein_coding
ENSDARG00000069708	0.757301	2.11595e-05	0.00031059	cdc34a	protein_coding
ENSDARG00000059746	0.756904	0.00287896	0.0182501	plod1a	protein_coding
ENSDARG00000070606	0.755324	0.0015853	0.0113911	ikbke	protein_coding
ENSDARG00000111876	0.754743	0.00871561	0.0438197	CABZ01048392.1	protein_coding
ENSDARG00000091835	0.754025	0.00679342	0.0360407	si:ch73-264p11.1	protein_coding
ENSDARG00000045199	0.753986	5.56317e-07	1.30072e-05	zgc:55262	protein_coding
ENSDARG00000060081	0.753858	4.45037e-05	0.000581943	crb2b	protein_coding
ENSDARG00000025254	0.752974	0.00427035	0.0251191	s100a10b	protein_coding
ENSDARG00000063572	0.752967	4.72309e-07	1.12196e-05	perp	protein_coding
ENSDARG00000070903	0.752577	4.15836e-13	3.52306e-11	met	protein_coding
ENSDARG00000053624	0.752511	5.28391e-05	0.00067086	csf1rb	protein_coding
ENSDARG00000101244	0.751932	9.21893e-07	2.01982e-05	gli1	protein_coding
ENSDARG00000092499	0.751633	5.2682e-05	0.000669248	si:ch211-183d21.1	protein_coding
ENSDARG00000075164	0.751034	0.00461723	0.0267154	mylk5	protein_coding
ENSDARG00000090785	0.750213	2.85117e-07	7.2111e-06	diaph3	protein_coding
ENSDARG00000040266	0.749896	6.72676e-11	3.97575e-09	sox19b	protein_coding
ENSDARG00000043137	0.749635	0.00980146	0.0479672	cdca8	protein_coding
ENSDARG00000012073	0.749538	0.000224937	0.002266	kif15	protein_coding
ENSDARG00000008287	0.747368	0.00690509	0.0365567	fam114a1	protein_coding
ENSDARG00000028507	0.74678	2.20492e-05	0.000321953	itgb4	protein_coding
ENSDARG00000009484	0.745293	3.36954e-06	6.4007e-05	arf1	protein_coding
ENSDARG00000042925	0.745079	0.000461352	0.00413011	mfng	protein_coding
ENSDARG00000070670	0.744763	1.31245e-06	2.74591e-05	crip2	protein_coding
ENSDARG00000068406	0.744574	0.000250469	0.00248263	six5	protein_coding
ENSDARG00000110105	0.744048	0.00115139	0.00875903	CABZ01044235.1	protein_coding
ENSDARG00000020541	0.743702	0.00885413	0.0443395	ism1	protein_coding
ENSDARG00000017329	0.743606	0.00428366	0.0251644	cdkl1	protein_coding
ENSDARG00000071084	0.742974	3.77874e-06	7.08736e-05	wipf1b	protein_coding
ENSDARG00000091555	0.742819	9.57036e-07	2.07843e-05	ostf1	protein_coding
ENSDARG00000104404	0.741126	4.9488e-05	0.000635557	b4galt1l	protein_coding
ENSDARG00000077778	0.738288	0.000398741	0.00367594	adamts9	protein_coding
ENSDARG00000070669	0.738087	0.0028001	0.0178773	cxcr3.3	protein_coding
ENSDARG00000097750	0.736687	0.00216829	0.0145831	CR854827.3	antisense
ENSDARG00000092517	0.736433	1.50054e-05	0.000230745	gpsm1a	protein_coding
ENSDARG00000115843	0.736171	0.000855799	0.00689155	si:rp71-1k13.6	protein_coding
ENSDARG00000103713	0.736004	8.06399e-07	1.78788e-05	cd248a	protein_coding
ENSDARG00000043658	0.735913	2.95977e-07	7.45193e-06	cxadr	protein_coding
ENSDARG00000042854	0.735295	4.21563e-05	0.000556804	ephx1	protein_coding
ENSDARG00000005368	0.734846	2.1513e-12	1.61943e-10	mcamb	protein_coding
ENSDARG00000102986	0.734487	2.5442e-06	4.98154e-05	csf1ra	protein_coding
ENSDARG00000027345	0.732622	0.00545491	0.0305239	mpzl2b	protein_coding
ENSDARG00000101089	0.732268	0.00383579	0.0229941	gart	protein_coding
ENSDARG00000018283	0.730351	0.00218817	0.0147035	cyba	protein_coding
ENSDARG00000056233	0.730032	0.00994788	0.0485136	zgc:110591	protein_coding
ENSDARG00000070677	0.72926	0.00015622	0.00166709	fezf2	protein_coding
ENSDARG00000014017	0.729145	4.3028e-09	1.71819e-07	rrm1	protein_coding
ENSDARG00000089043	0.726988	0.000648846	0.00547379	ptpn6	protein_coding
ENSDARG00000036628	0.726719	1.36714e-05	0.000213025	cd74b	protein_coding
ENSDARG00000040503	0.726488	3.64022e-05	0.000490691	sb:cb81	protein_coding
ENSDARG00000056530	0.725788	0.00504122	0.0287212	cpamd8	protein_coding
ENSDARG00000078310	0.725768	5.85796e-15	6.49388e-13	cecr2	protein_coding
ENSDARG00000101056	0.724807	0.000569109	0.00489988	BX890539.1	protein_coding
ENSDARG00000102855	0.724537	7.14533e-15	7.72875e-13	neo1a	protein_coding
ENSDARG00000055439	0.724137	0.00245567	0.0160649	adamtsl7	protein_coding
ENSDARG00000076004	0.723374	0.000126125	0.00138576	ppp2r3b	protein_coding
ENSDARG00000101242	0.722891	1.49812e-05	0.000230532	zcchc14	protein_coding
ENSDARG00000078959	0.722807	0.00227414	0.0151578	tpcn3	protein_coding
ENSDARG00000100364	0.721628	0.0021489	0.0144745	FO907110.1	protein_coding
ENSDARG00000045257	0.721414	0.00355944	0.0216816	decr2	protein_coding
ENSDARG00000105162	0.721131	0.00196219	0.0134652	CR293509.1	lincRNA
ENSDARG00000033345	0.720972	0.000899258	0.00716897	cntln	protein_coding
ENSDARG00000036168	0.717735	0.000839538	0.00678816	nfatc1	protein_coding
ENSDARG00000099385	0.717521	0.00963296	0.0473613	CT030188.1	protein_coding
ENSDARG00000024818	0.71616	0.00436302	0.0255632	rilpl2	protein_coding
ENSDARG00000003244	0.716128	5.56321e-06	9.86153e-05	gbp3	protein_coding
ENSDARG00000054823	0.715761	4.54824e-08	1.41098e-06	id3	protein_coding
ENSDARG00000094324	0.715175	4.16301e-06	7.71075e-05	efemp2a	protein_coding
ENSDARG00000014793	0.714915	8.81793e-08	2.55759e-06	ehd1b	protein_coding
ENSDARG00000006110	0.714669	3.50777e-05	0.000473984	chrd	protein_coding
ENSDARG00000029722	0.713402	1.39417e-05	0.000216782	hmgb2a	protein_coding
ENSDARG00000094752	0.713024	1.58584e-06	3.26307e-05	rpe65b	protein_coding
ENSDARG00000100529	0.712394	2.65206e-07	6.79233e-06	sh3bp5a	protein_coding
ENSDARG00000007494	0.71231	3.86928e-06	7.23282e-05	st3gal8	protein_coding
ENSDARG00000093165	0.712061	0.00187155	0.0129509	si:dkey-16p6.2	protein_coding
ENSDARG00000078797	0.710804	0.000268411	0.00262543	dennd3a	protein_coding
ENSDARG00000089805	0.710492	8.26471e-06	0.000140255	pcdh18a	protein_coding
ENSDARG00000059700	0.709375	0.00945525	0.0466911	agmat	protein_coding
ENSDARG00000104702	0.708677	1.2562e-13	1.12412e-11	cat	protein_coding
ENSDARG00000059177	0.707969	0.00624174	0.0337948	tax1bp3	protein_coding
ENSDARG00000075891	0.707966	0.0047236	0.0272389	sall1b	protein_coding
ENSDARG00000012729	0.707695	0.00257797	0.0167276	hcls1	protein_coding
ENSDARG00000033950	0.707126	0.000576045	0.00495385	lamb2l	protein_coding
ENSDARG00000077826	0.707072	4.88879e-05	0.000628938	efcc1	protein_coding
ENSDARG00000035120	0.70664	2.53868e-05	0.000362669	gldc	protein_coding
ENSDARG00000080010	0.706074	0.000340199	0.00322018	adh5	protein_coding
ENSDARG00000020759	0.706061	4.6138e-06	8.39907e-05	elf1	protein_coding
ENSDARG00000018404	0.705896	2.56622e-05	0.000365604	krt18	protein_coding
ENSDARG00000098834	0.705051	2.21729e-05	0.000323336	sox4b	protein_coding
ENSDARG00000060004	0.703549	0.00704302	0.0370999	fzd7a	protein_coding
ENSDARG00000035879	0.70334	0.000405084	0.0037221	fuca1.2	protein_coding
ENSDARG00000059472	0.70326	6.02612e-09	2.32711e-07	arhgap31	protein_coding
ENSDARG00000097396	0.702355	1.06442e-05	0.000173864	BX539313.1	lincRNA
ENSDARG00000104311	0.70216	1.55613e-05	0.000238307	scmh1	protein_coding
ENSDARG00000077298	0.70214	0.0074311	0.0387956	gas1a	protein_coding
ENSDARG00000027930	0.702077	0.00258041	0.0167287	naprt	protein_coding
ENSDARG00000090734	0.701266	0.00838297	0.0425004	si:dkey-196n19.2	protein_coding
ENSDARG00000003113	0.700569	6.23785e-06	0.000109356	ada	protein_coding
ENSDARG00000090297	0.700498	0.00662048	0.0352913	ldlrad2	protein_coding
ENSDARG00000055009	0.699635	6.33972e-08	1.9038e-06	col4a1	protein_coding
ENSDARG00000030417	0.699607	1.76762e-06	3.58056e-05	pkd1a	protein_coding
ENSDARG00000017388	0.697339	0.00486435	0.0279175	gstt1b	protein_coding
ENSDARG00000111934	0.696585	0.0054296	0.0304282	zgc:112234	protein_coding
ENSDARG00000074143	0.695947	6.58147e-08	1.96801e-06	myo10l3	protein_coding
ENSDARG00000062081	0.695672	5.74553e-05	0.000720439	tbc1d1	protein_coding
ENSDARG00000073673	0.695431	0.0028964	0.0183397	adgra3	protein_coding
ENSDARG00000010145	0.695188	0.00628091	0.033944	tor4aa	protein_coding
ENSDARG00000093943	0.694788	0.00454544	0.026396	BX294181.2	antisense
ENSDARG00000088308	0.693663	0.00214392	0.0144541	notchl	protein_coding
ENSDARG00000003061	0.692946	0.00947738	0.0467512	cd276	protein_coding
ENSDARG00000079578	0.692884	3.9177e-05	0.000522407	rbpms2b	protein_coding
ENSDARG00000088091	0.692373	1.89521e-07	5.07562e-06	pfn1	protein_coding
ENSDARG00000040606	0.691168	0.00672225	0.0357142	tfap2c	protein_coding
ENSDARG00000075819	0.691047	1.5498e-09	6.97628e-08	arhgef2	protein_coding
ENSDARG00000038159	0.689798	1.12528e-06	2.3948e-05	tcf7l1a	protein_coding
ENSDARG00000091702	0.689739	0.00368057	0.0222227	csnk2a4	protein_coding
ENSDARG00000086615	0.689637	0.00896492	0.0447705	CR846087.1	unprocessed_pseudogene
ENSDARG00000076005	0.689376	2.66132e-06	5.18805e-05	piezo2a.2	protein_coding
ENSDARG00000078640	0.689252	0.000145512	0.00156732	fam117aa	protein_coding
ENSDARG00000017004	0.689146	7.78598e-20	1.56295e-17	myo10	protein_coding
ENSDARG00000045524	0.688877	3.43731e-09	1.40532e-07	lamb1b	protein_coding
ENSDARG00000003216	0.688756	6.08494e-12	4.2503e-10	anxa2a	protein_coding
ENSDARG00000040812	0.688377	0.00290852	0.0184008	ncf4	protein_coding
ENSDARG00000100357	0.687562	3.07207e-05	0.000425431	si:ch73-44m9.3	protein_coding
ENSDARG00000075943	0.687449	0.00180503	0.0126001	si:ch211-250c4.5	protein_coding
ENSDARG00000075625	0.686639	6.2877e-06	0.000109971	lrig1	protein_coding
ENSDARG00000026395	0.686599	0.00026026	0.00256485	rfx4	protein_coding
ENSDARG00000069105	0.686579	0.000220936	0.00223362	fgfr4	protein_coding
ENSDARG00000016457	0.68563	1.65097e-05	0.00025162	irf9	protein_coding
ENSDARG00000068103	0.685342	0.00498253	0.0284507	cfap45	protein_coding
ENSDARG00000099476	0.683069	1.14981e-05	0.000184715	zgc:174863	protein_coding
ENSDARG00000101457	0.682612	5.02988e-12	3.55796e-10	cdc42ep4a	protein_coding
ENSDARG00000101637	0.682255	7.08443e-06	0.000122368	ccnd1	protein_coding
ENSDARG00000061486	0.681464	8.15547e-09	3.05412e-07	DNAH10	protein_coding
ENSDARG00000067916	0.68143	0.000169706	0.00178397	lyn	protein_coding
ENSDARG00000067719	0.681008	2.59066e-05	0.000368023	wwtr1	protein_coding
ENSDARG00000098237	0.679495	5.79165e-09	2.272e-07	fbn2b	protein_coding
ENSDARG00000098589	0.678905	0.00532965	0.0300115	cyb5a	protein_coding
ENSDARG00000105239	0.678201	4.06606e-08	1.28147e-06	ecm1b	protein_coding
ENSDARG00000011863	0.677974	3.27564e-06	6.24896e-05	ptk7a	protein_coding
ENSDARG00000061478	0.677697	3.12875e-07	7.80682e-06	igf2bp1	protein_coding
ENSDARG00000030616	0.676574	0.00630184	0.0340317	nfe2l1a	protein_coding
ENSDARG00000089529	0.67649	0.00398779	0.0237139	desi1b	protein_coding
ENSDARG00000010710	0.675617	1.54663e-06	3.19092e-05	msi1	protein_coding
ENSDARG00000060023	0.672995	0.000617774	0.0052439	ncapg2	protein_coding
ENSDARG00000014348	0.671185	2.15119e-08	7.2188e-07	stk17b	protein_coding
ENSDARG00000058358	0.669504	4.34664e-14	4.18221e-12	krt8	protein_coding
ENSDARG00000087704	0.669249	0.00113608	0.00865442	gfra3	protein_coding
ENSDARG00000009839	0.669123	1.56797e-05	0.00023979	fam117bb	protein_coding
ENSDARG00000052565	0.667857	0.00110961	0.00849631	cenpi	protein_coding
ENSDARG00000046030	0.665808	0.000146678	0.00157888	zgc:110339	protein_coding
ENSDARG00000038557	0.664539	0.00239772	0.0157692	anks3	protein_coding
ENSDARG00000090552	0.663341	0.00147909	0.0107773	si:dkey-7j14.6	protein_coding
ENSDARG00000068401	0.661855	1.56538e-11	1.01988e-09	yap1	protein_coding
ENSDARG00000015707	0.661672	4.12601e-08	1.29853e-06	dvl3a	protein_coding
ENSDARG00000042961	0.661524	0.000480635	0.00427696	zgc:100920	protein_coding
ENSDARG00000103456	0.661104	2.84836e-06	5.51888e-05	cyp2aa11	protein_coding
ENSDARG00000044975	0.660943	1.18653e-05	0.00018898	krt94	protein_coding
ENSDARG00000017794	0.659584	0.000201633	0.00207327	sdr16c5b	protein_coding
ENSDARG00000025949	0.658485	0.00452082	0.0263071	irak1	protein_coding
ENSDARG00000068177	0.656155	5.3103e-06	9.48871e-05	pak2a	protein_coding
ENSDARG00000026294	0.655676	9.43533e-05	0.00108706	erbb2	protein_coding
ENSDARG00000099719	0.655365	0.000111554	0.00125032	cdkn1d	protein_coding
ENSDARG00000106062	0.654685	0.0029561	0.0186647	fzd1	protein_coding
ENSDARG00000010144	0.653885	0.00506524	0.0288211	plppr3a	protein_coding
ENSDARG00000044760	0.653631	0.000224953	0.002266	gnaia	protein_coding
ENSDARG00000058325	0.653355	0.0100983	0.0489897	casp8	protein_coding
ENSDARG00000097491	0.653089	0.0034691	0.0212534	ugt1b1	protein_coding
ENSDARG00000020893	0.649659	1.28894e-06	2.70435e-05	slc25a55a	protein_coding
ENSDARG00000112056	0.648865	3.44708e-08	1.10515e-06	CABZ01066921.1	protein_coding
ENSDARG00000071463	0.647578	5.80423e-05	0.00072535	zgc:154125	protein_coding
ENSDARG00000029955	0.647505	0.00315185	0.0196666	glb1l	protein_coding
ENSDARG00000099849	0.647327	1.28731e-05	0.000202427	ebf1a	protein_coding
ENSDARG00000039174	0.647106	0.00345487	0.0211778	olfm3b	protein_coding
ENSDARG00000058533	0.646795	9.82928e-05	0.00112837	pole	protein_coding
ENSDARG00000002750	0.646762	1.29378e-10	7.35407e-09	phf20a	protein_coding
ENSDARG00000020053	0.645796	0.00832915	0.0422564	nkd1	protein_coding
ENSDARG00000087993	0.645693	1.32444e-07	3.6935e-06	bada	protein_coding
ENSDARG00000002642	0.645263	1.11899e-05	0.000180807	sh3gl1b	protein_coding
ENSDARG00000054344	0.644957	0.00333173	0.0205189	gabpb2b	protein_coding
ENSDARG00000053569	0.642447	1.54101e-08	5.39038e-07	sox3	protein_coding
ENSDARG00000032083	0.641695	3.898e-10	2.0246e-08	dpysl2b	protein_coding
ENSDARG00000073859	0.640612	0.0023882	0.0157205	kif13bb	protein_coding
ENSDARG00000101690	0.640305	0.000172273	0.00180639	si:ch73-158p21.2	protein_coding
ENSDARG00000025847	0.639621	1.44726e-09	6.58121e-08	sox12	protein_coding
ENSDARG00000058459	0.639514	4.95989e-05	0.000636614	plekhg2	protein_coding
ENSDARG00000105285	0.638901	6.72556e-08	2.00614e-06	FAT4	protein_coding
ENSDARG00000078166	0.638452	0.000443752	0.00400798	si:dkey-78p8.1	protein_coding
ENSDARG00000040255	0.636737	0.000121643	0.00134648	ephx2	protein_coding
ENSDARG00000031761	0.636289	0.00931661	0.0461462	dab2	protein_coding
ENSDARG00000100093	0.636183	6.2461e-06	0.000109415	ppp2r2ba	protein_coding
ENSDARG00000027397	0.635875	1.23141e-11	8.19055e-10	vangl2	protein_coding
ENSDARG00000035506	0.634302	0.00436784	0.0255847	entpd2a.1	protein_coding
ENSDARG00000076564	0.633384	3.11182e-06	5.97223e-05	hspg2	protein_coding
ENSDARG00000062936	0.633275	0.000229164	0.00230114	ndnf	protein_coding
ENSDARG00000052496	0.632918	8.27735e-05	0.000975852	hmha1a	protein_coding
ENSDARG00000009387	0.63256	0.000584484	0.00500518	robo4	protein_coding
ENSDARG00000101312	0.63198	8.11053e-05	0.00095872	si:dkey-31n13.4	protein_coding
ENSDARG00000055225	0.631549	4.15511e-09	1.66818e-07	dock8	protein_coding
ENSDARG00000058996	0.63054	0.000166625	0.00175793	jam2a	protein_coding
ENSDARG00000078888	0.629186	2.22188e-06	4.4007e-05	iqgap1	protein_coding
ENSDARG00000059337	0.628234	1.33064e-11	8.79804e-10	tgif1	protein_coding
ENSDARG00000015902	0.628161	6.13568e-07	1.42116e-05	stat6	protein_coding
ENSDARG00000097264	0.628134	0.0028733	0.0182245	si:ch211-40k21.5	protein_coding
ENSDARG00000005058	0.62775	2.62107e-05	0.000371519	ncapd2	protein_coding
ENSDARG00000015016	0.627746	6.72993e-07	1.53959e-05	kif26ab	protein_coding
ENSDARG00000040178	0.627352	0.00159198	0.0114316	havcr1	protein_coding
ENSDARG00000037924	0.627248	5.27413e-08	1.61272e-06	gna13b	protein_coding
ENSDARG00000083986	0.626739	0.00659867	0.0352087	RF01241	snoRNA
ENSDARG00000009087	0.625451	1.26467e-05	0.000199854	cd74a	protein_coding
ENSDARG00000062552	0.625096	6.54482e-05	0.000803923	lpar6a	protein_coding
ENSDARG00000062837	0.62501	0.000256141	0.00253314	spata13	protein_coding
ENSDARG00000028159	0.624498	0.000205182	0.00210104	tead1a	protein_coding
ENSDARG00000099645	0.62434	0.00880609	0.0441732	zgc:153184	protein_coding
ENSDARG00000011190	0.623584	0.00055724	0.00481443	fgfr1b	protein_coding
ENSDARG00000087782	0.62339	0.00548637	0.0306351	rnf152	protein_coding
ENSDARG00000094133	0.622624	2.60048e-06	5.08279e-05	wu:fc21g02	protein_coding
ENSDARG00000091975	0.622379	0.00809344	0.0413999	AL929229.1	processed_transcript
ENSDARG00000099984	0.621059	0.00893158	0.0446519	CABZ01023255.1	protein_coding
ENSDARG00000042126	0.618205	4.32628e-05	0.000568721	elmo3	protein_coding
ENSDARG00000074597	0.617776	9.91774e-05	0.00113676	lzts2a	protein_coding
ENSDARG00000102185	0.617753	8.01494e-05	0.000948932	PCDH8	protein_coding
ENSDARG00000029443	0.617402	0.00241357	0.0158431	zgc:92242	protein_coding
ENSDARG00000027638	0.61716	2.4119e-05	0.000346499	adra1ab	protein_coding
ENSDARG00000114086	0.616731	8.20356e-07	1.81521e-05	DOCK9 (1 of many)	protein_coding
ENSDARG00000098817	0.616606	0.000212818	0.00216136	CABZ01055522.1	protein_coding
ENSDARG00000117133	0.616012	0.00729549	0.038231	cst14b.1	protein_coding
ENSDARG00000013524	0.61591	0.00500715	0.0285562	cyp2ae1	protein_coding
ENSDARG00000039652	0.615836	0.000241516	0.00240003	si:dkey-235d18.5	protein_coding
ENSDARG00000015472	0.615175	6.25932e-07	1.44379e-05	gpc4	protein_coding
ENSDARG00000093201	0.614648	0.0062297	0.0337616	si:dkey-112e17.1	protein_coding
ENSDARG00000061030	0.612037	2.68454e-07	6.85188e-06	vezf1b	protein_coding
ENSDARG00000041546	0.610722	0.00192921	0.0132634	gypc	protein_coding
ENSDARG00000078118	0.610186	0.00052985	0.00463328	sinhcafl	protein_coding
ENSDARG00000075748	0.608419	0.0080113	0.0411024	NCKAP1L	protein_coding
ENSDARG00000036096	0.607458	0.00794546	0.0408587	smad3a	protein_coding
ENSDARG00000004840	0.607022	0.000469668	0.00419626	rassf1	protein_coding
ENSDARG00000074169	0.606496	8.31624e-24	2.20598e-21	gpam	protein_coding
ENSDARG00000104767	0.606363	0.000268025	0.00262281	CR381531.2	protein_coding
ENSDARG00000113205	0.60531	0.000170253	0.00178774	zgc:163040	protein_coding
ENSDARG00000040684	0.604989	1.67204e-06	3.40552e-05	plcd4b	protein_coding
ENSDARG00000016429	0.604474	2.08897e-16	3.04225e-14	farp2	protein_coding
ENSDARG00000054162	0.601952	0.00364917	0.0220833	nfatc4	protein_coding
ENSDARG00000034013	0.601871	8.4703e-05	0.000995438	rgmd	protein_coding
ENSDARG00000101983	0.601561	3.14685e-05	0.000433226	pkn2	protein_coding
ENSDARG00000103046	0.600924	1.79687e-07	4.85896e-06	rest	protein_coding
ENSDARG00000097950	0.600675	0.000865291	0.00695542	BX663520.1	lincRNA
ENSDARG00000007315	0.600465	3.4356e-06	6.50953e-05	tmpoa	protein_coding
ENSDARG00000056438	0.599796	0.00174185	0.0122281	her9	protein_coding
ENSDARG00000013168	0.599685	1.6987e-05	0.000257487	jag1b	protein_coding
ENSDARG00000101069	0.599271	0.00023005	0.00230625	CU651669.1	lincRNA
ENSDARG00000078481	0.599192	0.00143685	0.0105385	zgc:195081	protein_coding
ENSDARG00000044254	0.597826	1.15581e-08	4.1876e-07	anxa3b	protein_coding
ENSDARG00000014098	0.59775	2.76274e-05	0.000389617	pkd2	protein_coding
ENSDARG00000103052	0.597251	5.84747e-07	1.36006e-05	pcyox1	protein_coding
ENSDARG00000036865	0.596882	0.00599424	0.0327924	slc2a12	protein_coding
ENSDARG00000105355	0.59667	0.00108902	0.00838479	zgc:154164	protein_coding
ENSDARG00000060438	0.596486	0.00770724	0.0399379	tbl1x	protein_coding
ENSDARG00000093382	0.596071	0.0015172	0.0110029	uqcc3	protein_coding
ENSDARG00000102808	0.59444	7.46515e-10	3.61605e-08	calr3b	protein_coding
ENSDARG00000103900	0.592014	3.9406e-08	1.24545e-06	sept9b	protein_coding
ENSDARG00000056619	0.591035	7.99554e-08	2.34417e-06	arhgap42a	protein_coding
ENSDARG00000015805	0.590409	1.02541e-06	2.20639e-05	cgnl1	protein_coding
ENSDARG00000115017	0.590211	0.00405504	0.0240368	znf1033	protein_coding
ENSDARG00000098045	0.589614	0.00122663	0.00924309	CR751602.2	antisense
ENSDARG00000017038	0.589604	0.0055372	0.0308141	zgc:152670	protein_coding
ENSDARG00000044808	0.589385	0.004909	0.0281405	slc4a4b	protein_coding
ENSDARG00000077897	0.589142	0.00401452	0.0238538	znf296	protein_coding
ENSDARG00000018061	0.58825	0.00044485	0.00401341	neil1	protein_coding
ENSDARG00000099731	0.586739	9.37842e-05	0.00108387	CABZ01066719.1	protein_coding
ENSDARG00000060482	0.58636	0.000227247	0.00228395	mid1	protein_coding
ENSDARG00000002002	0.586013	0.00267397	0.0172201	lmcd1	protein_coding
ENSDARG00000017542	-0.585063	8.96354e-05	0.00104404	fgf1a	protein_coding
ENSDARG00000009779	-0.585119	8.69386e-13	7.06995e-11	mcl1a	protein_coding
ENSDARG00000005416	-0.585332	9.00076e-17	1.34601e-14	map3k5	protein_coding
ENSDARG00000035468	-0.586071	4.77379e-08	1.47326e-06	slc25a25b	protein_coding
ENSDARG00000025206	-0.586089	8.75277e-17	1.31777e-14	syt2a	protein_coding
ENSDARG00000022971	-0.586446	5.85881e-16	8.0584e-14	epha6	protein_coding
ENSDARG00000097528	-0.586724	5.48583e-09	2.15583e-07	si:dkey-7j14.5	protein_coding
ENSDARG00000099186	-0.586839	4.89396e-07	1.15639e-05	slc1a5	protein_coding
ENSDARG00000099812	-0.588026	2.4384e-10	1.32842e-08	si:dkey-31f5.11	protein_coding
ENSDARG00000096717	-0.588178	0.00274392	0.0175892	AL732488.1	lincRNA
ENSDARG00000002745	-0.588262	1.31229e-05	0.000205484	tdh	protein_coding
ENSDARG00000057368	-0.588983	8.50519e-06	0.000143651	rps8b	protein_coding
ENSDARG00000013787	-0.590561	4.63031e-15	5.2909e-13	gucy1a1	protein_coding
ENSDARG00000045447	-0.591014	1.24314e-11	8.24395e-10	slc35g2b	protein_coding
ENSDARG00000094646	-0.591232	3.02571e-18	5.35071e-16	dyrk2	protein_coding
ENSDARG00000002013	-0.591269	0.000414662	0.00378668	grb10a	protein_coding
ENSDARG00000028583	-0.593522	0.00140176	0.0103355	si:ch211-234h8.7	protein_coding
ENSDARG00000057029	-0.594117	0.00455592	0.0264362	htr2aa	protein_coding
ENSDARG00000009899	-0.594161	5.61288e-10	2.80418e-08	znf385a	protein_coding
ENSDARG00000043285	-0.594805	1.70081e-06	3.4578e-05	zbtb21	protein_coding
ENSDARG00000063914	-0.594942	5.40061e-08	1.64619e-06	mt-nd3	protein_coding
ENSDARG00000053711	-0.594943	1.33634e-05	0.000208956	GPR68	protein_coding
ENSDARG00000009459	-0.594954	3.12967e-08	1.01507e-06	slc35e4	protein_coding
ENSDARG00000078140	-0.597855	5.03475e-06	9.06906e-05	si:dkey-18j18.3	protein_coding
ENSDARG00000079045	-0.597957	0.00585491	0.0322226	opn8b	protein_coding
ENSDARG00000111235	-0.598109	1.01093e-09	4.76226e-08	nrsn1	protein_coding
ENSDARG00000062377	-0.598994	0.000142797	0.00154007	CABZ01033000.1	protein_coding
ENSDARG00000075376	-0.599387	1.51884e-13	1.34831e-11	sgsm1b	protein_coding
ENSDARG00000060112	-0.599646	1.27072e-08	4.55212e-07	sybu	protein_coding
ENSDARG00000056057	-0.600165	7.30757e-05	0.000875886	grem2a	protein_coding
ENSDARG00000019304	-0.601116	1.11853e-09	5.24696e-08	phactr3b	protein_coding
ENSDARG00000078560	-0.601868	4.7214e-07	1.12196e-05	slc9a5	protein_coding
ENSDARG00000045803	-0.602064	1.08081e-07	3.06785e-06	mfge8b	protein_coding
ENSDARG00000112453	-0.602401	5.90843e-09	2.3016e-07	FO818722.1	protein_coding
ENSDARG00000031044	-0.605355	0.00590739	0.0324688	lipg	protein_coding
ENSDARG00000027744	-0.605569	0.00160745	0.0115242	gadd45ba	protein_coding
ENSDARG00000056036	-0.606541	2.16725e-15	2.66799e-13	stxbp1b	protein_coding
ENSDARG00000113137	-0.60671	0.00282898	0.0180204	BX276107.1	protein_coding
ENSDARG00000057227	-0.6076	3.96348e-06	7.38413e-05	si:dkey-222b8.4	protein_coding
ENSDARG00000108535	-0.607667	0.00185925	0.0128898	CABZ01072077.1	protein_coding
ENSDARG00000105003	-0.60853	2.67371e-14	2.67412e-12	scn1bb	protein_coding
ENSDARG00000069632	-0.608926	0.00131477	0.00977501	emp1	protein_coding
ENSDARG00000030687	-0.608947	1.29691e-06	2.71595e-05	phka2	protein_coding
ENSDARG00000042213	-0.609687	1.16382e-05	0.000186294	si:ch211-233h19.2	protein_coding
ENSDARG00000044954	-0.610182	4.4153e-05	0.000578376	slit1a	protein_coding
ENSDARG00000035832	-0.61044	7.8065e-09	2.94322e-07	pyyb	protein_coding
ENSDARG00000105271	-0.610494	4.44655e-09	1.76925e-07	SEPT4	protein_coding
[truncated: 577 more rows]

## Sheet: SIG_TCGA-LGG
HumanGeneID	log2FoldChange	pvalue	padj	HumanGeneName	gene_biotype
[truncated: 7,992 more rows]

[truncated: 1 more sheets: SIG_TCGA-GBM]
