# Supplementary material for: Brain Regeneration Resembles Brain Cancer at Its Early Wound Healing Stage and Diverges From Cancer Later at Its Proliferation and Differentiation Stages
Source: Front Cell Dev Biol. 2022 Feb 10;10:813314. doi: 10.3389/fcell.2022.813314 (PMC8868567; doi:10.3389/fcell.2022.813314)
Supplement: Supplementary file 2 [file Table3.XLSX]

## Sheet: GO-BP_1dpl
Supplementary Table 3: GO-BP terms enriched at three different stages of zebrafish brain regeneration by using all DEGs.
Category	Term	Count	PValue	log10(Pvalue)	Genes	List.Total	Pop.Hits	Pop.Total	Fold.Enrichment	Benjamini	FDR
GOTERM_BP	GO:0006412~translation	231	2.0891e-21	-20.68	mrpl13, eif3bb, BX248510.1, si:ch211-153b23.4, rps18, ucp2, mrpl23, mrps17, ogfod1, rpl27, rplp2l, rpl7l1, si:dkey-17e16.10, ago2, rpl28, polr2d, nhp2, guf1, rpl29, rps14, eif3ha, mcts1, slc25a48, rps21, rpl18, mrpl17, slc25a5, mrpl37, eif3d, zfp36l2, rps13, rps2, rpl22l1, mrpl57, mrpl11, srp9, slc25a22a, rpl34, ptrh1, mrpl16, rps11, rps27.2, slc25a25a, rpl30, ago3a, rpl32, eef2b, dre-mir-21-2, r…	3383	525	13373	1.73932	5.5624e-18	5.45568e-18
GOTERM_BP	GO:0043604~amide biosynthetic process	250	3.68005e-21	-20.4341	mrpl13, eif3bb, BX248510.1, si:ch211-153b23.4, rps18, ucp2, mrpl23, mrps17, ogfod1, rpl27, rplp2l, rpl7l1, si:dkey-17e16.10, ago2, rpl28, polr2d, nhp2, guf1, rpl29, rps14, eif3ha, mcts1, slc25a48, rps21, rpl18, mrpl17, slc25a5, st3gal3b, mrpl37, eif3d, zfp36l2, rps13, rps2, st6galnac1.2, rpl22l1, mrpl57, mrpl11, srp9, st3gal3a, slc25a22a, gss, aanat2, rpl34, ptrh1, mrpl16, rps11, rps27.2, slc25a2…	3383	584	13373	1.69221	5.5624e-18	5.45568e-18
GOTERM_BP	GO:0043043~peptide biosynthetic process	232	6.71773e-21	-20.1728	mrpl13, eif3bb, BX248510.1, si:ch211-153b23.4, rps18, ucp2, mrpl23, mrps17, ogfod1, rpl27, rplp2l, rpl7l1, si:dkey-17e16.10, ago2, rpl28, polr2d, nhp2, guf1, rpl29, rps14, eif3ha, mcts1, slc25a48, rps21, rpl18, mrpl17, slc25a5, mrpl37, eif3d, zfp36l2, rps13, rps2, rpl22l1, mrpl57, mrpl11, srp9, slc25a22a, gss, rpl34, ptrh1, mrpl16, rps11, rps27.2, slc25a25a, rpl30, ago3a, rpl32, eef2b, dre-mir-21…	3383	532	13373	1.72386	6.76923e-18	6.63936e-18
GOTERM_BP	GO:0006518~peptide metabolic process	257	1.02789e-19	-18.9881	mrpl13, cndp2, eif3bb, BX248510.1, si:ch211-153b23.4, rps18, ucp2, mrpl23, mrps17, ANPEP (1 of many), ogfod1, rpl27, rplp2l, rpl7l1, si:dkey-17e16.10, ago2, rpl28, polr2d, nhp2, guf1, rpl29, rps14, eif3ha, mcts1, slc25a48, rps21, sec11a, rpl18, mrpl17, slc25a5, mrpl37, eif3d, zfp36l2, rps13, rps2, rpl22l1, mrpl57, mrpl11, srp9, slc25a22a, gss, immp2l, rpl34, ptrh1, mrpl16, rps11, ggt1a, rps27.2, …	3383	618	13373	1.64389	7.76825e-17	7.61921e-17
GOTERM_BP	GO:0006364~rRNA processing	73	5.85365e-13	-12.2326	ngdn, utp15, eif6, gnl3l, exosc6, fdxacb1, mrto4, rpl7l1, mphosph6, nhp2, pih1d1, rps14, nop58, si:ch211-217k17.7, rps21, gar1, wdr12, rrp7a, noc4l, rps16, bms1, abt1, mak16, nop2, rrp15, exosc9, rpl7, rcl1, pop4, nop10, nop56, rps6, mettl16, rpf1, rps8a, mrps11, utp3, imp4, ebna1bp2, tsr2, rpsa, nsun5, ftsj3, rps7, si:dkey-251i10.3, exosc8, rrp9, dis3l2, rpl35, trmt112, utp11l, utp6, emg1, rsl1d…	3383	132	13373	2.18613	3.53911e-10	3.47121e-10
GOTERM_BP	GO:0022618~ribonucleoprotein complex assembly	67	2.32448e-11	-10.6337	eif3bb, eif6, eif2d, rpl5a, rpl6, rps15, mrto4, rpl11, eif3ea, eif4bb, snrpd2, snrpc, polr2d, bxdc2, clns1a, snrpd1, pih1d1, rps14, eif3ha, rps19, rpl24, mcts1, rrp7a, eif3d, abt1, nip7, rpl23a, mrpl11, ruvbl1, eif2s3, lsm3, denr, coil, rpl3, rps17, rpf1, mrps11, ppan, rps5, rps27.2, gemin8, eif3jb, sf3a2, rpsa, snrpe, mrps7, eif3i, isy1, rpl10, prmt7, luc7l, rps27.1, zgc:114188, rpf2, txnl4a, ls…	3383	124	13373	2.1359	1.04666e-08	1.02658e-08
GOTERM_BP	GO:0042273~ribosomal large subunit biogenesis	39	2.42363e-11	-10.6155	rpl3, rpf1, eif6, ppan, rpl5a, ebna1bp2, nop16, aamp, noc2l, ftsj3, rpl6, mrto4, rpl7l1, rpl11, bxdc2, rpl35, rpl10, nhp2, rpl24, snu13b, rsl1d1, rpl7a, wdr12, rpf2, rpl10a, nop2, mak16, nip7, rrs1, rpl23a, rrp15, heatr3, mrpl11, rpl12, rpl7, sdad1, rpl14, rpl35a, mrpl1	3383	56	13373	2.75298	1.04666e-08	1.02658e-08
GOTERM_BP	GO:0042255~ribosome assembly	31	5.84446e-11	-10.2333	rpl3, rps17, rpf1, eif6, mrps11, ppan, rps5, rpl5a, rps27.2, rpsa, rpl6, rps15, mrto4, mrps7, rpl11, bxdc2, rpl10, rps14, rps19, rps27.1, rpl24, zgc:114188, rrp7a, rpf2, abt1, nip7, rpl23a, mrpl11, rpl12, rps28, rps10	3383	40	13373	3.06358	2.20848e-08	2.1661e-08
GOTERM_BP	GO:0035556~intracellular signal transduction	402	1.02391e-09	-8.98974	rhobtb1, mtor, nyap2a, sh3bp5la, rab22a, trim23, vegfaa, si:ch211-132f19.7, si:dkey-110c1.7, gpr4, obscnb, akap6, arhgap33, sav1, fgd4a, si:dkey-34d22.5, map3k12, cdc42bpb, wsb1, rhof, ppp1r9ba, OTUD7A, gna12a, sipa1l1, asb12a, socs2, MAP3K13, diras1b, RASGRP2, si:ch211-182d3.1, fbxw7, sh2d3ca, tgfb2l, stat5a, lamtor4, rap1gap, plch1, arf1, cdc42ep4a, socs6a, tgfb1b, rab13, RASGRF1, ralgps1, tica…	3383	1231	13373	1.29091	3.26405e-07	3.20143e-07
GOTERM_BP	GO:0030097~hemopoiesis	140	1.07974e-09	-8.96668	ptenb, adnpb, kri1, ciapin1, rpl27, haus3, snrkb, kalrna, fgf1a, ago2, rgs18, metap2b, mitfb, rps14, etv2, csf3a, vegfaa, notch3, gar1, snx5, notch1b, gata1a, csf3r, rpl22l1, fosab, lmo2, chrd, nop10, sae1, npm1a, selplg, cdca7a, slc11a2, hbba1, rplp1, gpr18, tet3, gpr65, pim2, ada2b, nos1, rps7, klf1, rps29, tet2, smox, rpl35, ncoa2, rps3, clpxa, si:dkey-103e21.5, jagn1a, stat5a, bcl6ab, ehd3, a…	3383	349	13373	1.58573	3.26405e-07	3.20143e-07
GOTERM_BP	GO:0042274~ribosomal small subunit biogenesis	38	1.34188e-09	-8.87229	ngdn, rps17, rps8a, mrps11, rps5, utp3, tsr2, rps27.2, rpsa, rps15, mrps7, rps7, si:dkey-251i10.3, rps14, utp11l, rps19, utp6, rps27.1, emg1, snu13b, rps21, zgc:114188, nat10, rrp7a, noc4l, rps16, bms1, abt1, tsr1, rrs1, rps24, wdr3, lsm6, wdr46, rcl1, rps28, rps10, rps6	3383	59	13373	2.546	3.68774e-07	3.61698e-07
GOTERM_BP	GO:0048534~hematopoietic or lymphoid organ development	142	3.04693e-09	-8.51614	ptenb, adnpb, kri1, ciapin1, rpl27, haus3, snrkb, kalrna, fgf1a, ago2, rgs18, metap2b, mitfb, rps14, etv2, csf3a, vegfaa, notch3, gar1, snx5, notch1b, gata1a, csf3r, rpl22l1, fosab, lmo2, chrd, nop10, sae1, npm1a, selplg, cdca7a, slc11a2, hbba1, rplp1, gpr18, tet3, gpr65, pim2, ada2b, nos1, rps7, klf1, rps29, tet2, smox, rpl35, ncoa2, mcm2, rps3, clpxa, si:dkey-103e21.5, jagn1a, stat5a, bcl6ab, e…	3383	360	13373	1.55924	7.67572e-07	7.52845e-07
GOTERM_BP	GO:0002520~immune system development	142	1.06857e-08	-7.9712	ptenb, adnpb, kri1, ciapin1, rpl27, haus3, snrkb, kalrna, fgf1a, ago2, rgs18, metap2b, mitfb, rps14, etv2, csf3a, vegfaa, notch3, gar1, snx5, notch1b, gata1a, csf3r, rpl22l1, fosab, lmo2, chrd, nop10, sae1, npm1a, selplg, cdca7a, slc11a2, hbba1, rplp1, gpr18, tet3, gpr65, pim2, ada2b, nos1, rps7, klf1, rps29, tet2, smox, rpl35, ncoa2, mcm2, rps3, clpxa, si:dkey-103e21.5, jagn1a, stat5a, bcl6ab, e…	3383	366	13373	1.53368	2.48483e-06	2.43716e-06
GOTERM_BP	GO:0007264~small GTPase mediated signal transduction	173	5.94785e-08	-7.22564	ARF4 (1 of many), gna13a, iqsec3b, CABZ01005876.1, rhobtb1, arhgdia, mcf2l2, rac3b, ralbp1, syngap1a, cyth1a, rab3ab, arhgap35b, ARHGEF17, rab8a, kalrna, nf1b, ABR (1 of many), rab22a, trim23, arl4ca, rac1a, rapgefl1, gpr4, arhgef33, obscnb, cplane2, triob, megf8, rapgef5a, prex1, rhebl1, rem2, si:dkey-91m11.5, rab8b, agap1, rab27b, cdc42l, arhgap33, rasgrp4, arf6b, si:dkey-34d22.5, fgd4a, rhobtb…	3383	476	13373	1.4367	1.28431e-05	1.25967e-05
GOTERM_BP	GO:0044267~cellular protein metabolic process	855	7.06801e-07	-6.1507	f13a1a.1, rps18, mrpl23, mrps17, ptprnb, sh3bp5la, rplp2l, ptpmt1, nhp2, nmt1b, wdyhv1, asphd2, metap2b, diablob, slc25a48, rps21, ttbk2b, eif3d, bsk146, rps2, map3k8, rabggtb, map3k12, ttn.1, chek2, cdc42bpb, camk2d1, immp2l, psmd6, rps11, rps27.2, uhrf1, slc25a25a, abl2, sdf2l1, tgfbr2b, rpl30, ube3b, ube2ka, sh2d3ca, ago3a, rnf24, dre-mir-21-2, eef2b, psma6a, eif2s2, ppp2r2ca, vars, dpy19l3, s…	3383	2973	13373	1.13684	0.000142444	0.000139711
GOTERM_BP	GO:0000028~ribosomal small subunit assembly	15	1.30611e-06	-5.88402	rps27.1, rps17, zgc:114188, mrps11, rrp7a, rps5, rps27.2, abt1, rpsa, rps15, mrps7, rps28, rps10, rps14, rps19	3383	17	13373	3.48794	0.000246774	0.000242039
GOTERM_BP	GO:0042278~purine nucleoside metabolic process	74	2.14351e-06	-5.66887	cox8a, pfklb, cycsb, adssl1, apip, mt-nd4, ndufs6, mt-atp6, atp5pf, ahcy, mt-nd5, nudt3a, dlst, nme3, cox5aa, sdhc, nudt4a, hk2, atp5l, atp5f1d, ndufb8, hmgcra, atp6v0a1b, cyc1, mtap, ahcyl1, pgam1a, atp5po, cox5ab, mt-cyb, eno3, mt-nd2, atp6v0a2b, cox4i1, atp5meb, adss, COX5B, tcirg1b, ada, atp5mc1, si:ch211-201h21.5, pfkla, atp5f1e, atp5f1c, cox6a1, impdh2, pank1b, ndufa7, nt5c2b, ada2b, ndufb9…	3383	177	13373	1.65267	0.00035999	0.000353084
GOTERM_BP	GO:0051056~regulation of small GTPase mediated signal transduction	74	2.14351e-06	-5.66887	CABZ01005876.1, iqsec3b, mcf2l2, fgd4b, cyth1a, syngap1a, tiam1b, f2r, ARHGEF17, kalrna, nf1b, ABR (1 of many), lpar6a, chn2, mcf2la, cyth4b, plekhg2, spry1, gpr17, CYTH2, ralgapa1, gpr4, obscnb, arhgef33, triob, arhgef9b, arfgef3, farp1, arhgef9a, ralgapa2, psda, prex1, fgd6, si:dkey-91m11.5, nf1a, ralgapb, robo4, iqsec2a, fgd4a, zmp:0000001168, ngef, arhgef37, akap12b, itsn1, arhgef11, gpr18, s…	3383	177	13373	1.65267	0.00035999	0.000353084
GOTERM_BP	GO:0034622~cellular macromolecular complex assembly	175	2.72383e-06	-5.56482	eif3bb, cacnb1, eif2d, arpc1a, snap47, rad51, eif4bb, psmc6, snrpd2, vbp1, snrpc, polr2d, arpc1b, bxdc2, clns1a, ipo4, pih1d1, rps14, eif3ha, rpl24, mcts1, psmd4b, TIMM21, rrp7a, eif3d, abt1, nip7, SNAP91 (1 of many), wash1, mrpl11, exoc8, lsm3, tcirg1b, ttn.1, si:ch211-103n10.5, tmod1, rpf1, ccdc103, immp2l, cenpx, daw1, cdc42ep4b, psmd9, rps27.2, sf3a2, wipf1b, pfn2, snrpe, vma21, mrps7, isy1, …	3383	508	13373	1.36176	0.000433375	0.000425061
GOTERM_BP	GO:0009123~nucleoside monophosphate metabolic process	67	4.99705e-06	-5.30129	cox8a, pfklb, cycsb, adssl1, mt-nd4, ndufs6, mt-atp6, atp5pf, mt-nd5, nudt3a, dlst, gart, cox5aa, sdhc, nudt4a, hk2, umps, atp5l, atp5f1d, ndufb8, ampd3b, atp6v0a1b, cyc1, pgam1a, atp5po, cox5ab, mt-cyb, eno3, mt-nd2, atp6v0a2b, tyms, cox4i1, atp5meb, adss, COX5B, tcirg1b, ada, atp5mc1, pfkla, atp5f1e, atp5f1c, cox6a1, impdh2, ndufa7, nt5c2b, ndufb9, adssl, adsl, cox7c, uqcrh, nudt3b, ndufv2, ndu…	3383	159	13373	1.66573	0.000755305	0.000740813
GOTERM_BP	GO:0000027~ribosomal large subunit assembly	14	1.39683e-05	-4.85486	rpl24, rpl3, rpf1, ppan, rpl5a, rpf2, rpl23a, rpl6, mrto4, rpl11, rpl12, mrpl11, bxdc2, rpl10	3383	17	13373	3.25541	0.00195051	0.00191309
GOTERM_BP	GO:0034660~ncRNA metabolic process	113	1.41949e-05	-4.84787	utp15, ctu2, si:ch211-153b23.4, thg1l, exosc6, urm1, rpl7l1, ago2, mphosph6, nhp2, zgc:136564, pih1d1, rps14, nop58, si:ch211-217k17.7, kdm2bb, rps21, gar1, rrp7a, noc4l, bms1, abt1, osgep, mak16, nop2, dtd1, mars, rrp15, farsb, rpl7, thumpd1, pop4, nop10, nop56, dus2, rpf1, rps8a, utp3, imp4, rnaset2, rtraf, rps7, rrp9, exosc8, rpl35, trmt112, rnasekb, yars, utp11l, utp6, rsl1d1, eri1, c1d, nat1…	3383	311	13373	1.4363	0.00195051	0.00191309
GOTERM_BP	GO:0009119~ribonucleoside metabolic process	77	1.9427e-05	-4.71159	cox8a, pfklb, cycsb, adssl1, apip, mt-nd4, ndufs6, mt-atp6, ctps1b, atp5pf, ahcy, mt-nd5, nudt3a, dlst, nme3, cox5aa, sdhc, nudt4a, hk2, umps, atp5l, atp5f1d, ndufb8, hmgcra, atp6v0a1b, cyc1, mtap, qtrt1, ahcyl1, pgam1a, atp5po, cox5ab, mt-cyb, eno3, mt-nd2, atp6v0a2b, cox4i1, atp5meb, adss, COX5B, tcirg1b, ada, atp5mc1, pfkla, atp5f1e, atp5f1c, cox6a1, impdh2, pank1b, ndufa7, nt5c2b, ada2b, nduf…	3383	196	13373	1.55296	0.00255339	0.0025044
GOTERM_BP	GO:0022904~respiratory electron transport chain	27	2.86768e-05	-4.54247	cox8a, cycsb, mt-nd4, ndufs6, mt-co3, cox6a1, d2hgdh, ndufa7, ndufb9, mt-nd5, cox7c, uqcrh, ndufv2, cox5aa, sdhc, ndufc2, ndufb8, uqcrq, mt-co2, cyc1, prkn, mt-cyb, cox5ab, mt-nd2, cox4i1, ndufa5, COX5B	3383	49	13373	2.17818	0.00361208	0.00354278
GOTERM_BP	GO:0009116~nucleoside metabolic process	82	3.55504e-05	-4.44916	cox8a, pfklb, cycsb, adssl1, apip, mt-nd4, ndufs6, mt-atp6, ctps1b, atp5pf, ahcy, mt-nd5, nudt3a, dlst, nme3, cox5aa, sdhc, nudt4a, hk2, umps, atp5l, atp5f1d, ndufb8, tymp, hmgcra, atp6v0a1b, cyc1, mtap, qtrt1, ahcyl1, pgam1a, atp5po, cox5ab, mt-cyb, eno3, mt-nd2, atp6v0a2b, cox4i1, atp5meb, adss, COX5B, tcirg1b, ada, atp5mc1, si:ch211-201h21.5, pfkla, atp5f1e, atp5f1c, cox6a1, impdh2, pank1b, nd…	3383	215	13373	1.50766	0.00429876	0.00421628
GOTERM_BP	GO:0030490~maturation of SSU-rRNA	24	4.26605e-05	-4.36997	emg1, utp6, ngdn, rps21, snu13b, rps8a, mrps11, noc4l, utp3, rps16, tsr2, abt1, bms1, tsr1, rpsa, rrs1, rps24, wdr3, lsm6, wdr46, si:dkey-251i10.3, rps28, rcl1, rps14	3383	42	13373	2.25886	0.0049601	0.00486494
GOTERM_BP	GO:0001731~formation of translation preinitiation complex	16	6.20184e-05	-4.20748	eif3bb, mcts1, eif2d, eif3d, eif3jb, eif3ea, eif3ba, eif3i, eif4bb, eif3ja, eif3k, eif2s3, denr, eif3ha, eif3m, eif3g	3383	23	13373	2.74991	0.00685534	0.00672381
GOTERM_BP	GO:0006396~RNA processing	164	6.34964e-05	-4.19725	utp15, ctu2, si:ch211-153b23.4, thg1l, exosc6, urm1, sf3b6, lyn, sf3b5, rpl7l1, srrm4, ago2, snrpd2, prpf38a, mphosph6, snrpc, polr2d, clns1a, nhp2, zgc:136564, pih1d1, rps14, nop58, si:ch211-217k17.7, trmt2a, rps21, gar1, rrp7a, noc4l, aurkaip1, ccnl1a, bms1, abt1, osgep, mak16, nop2, srsf1a, rrp15, magoh, ccnl1b, rpl7, nova2, thumpd1, pop4, ssb, nop10, nop56, dus2, lsm3, snrpf, rpf1, fip1l1b, p…	3383	495	13373	1.30968	0.00685534	0.00672381
GOTERM_BP	GO:0042773~ATP synthesis coupled electron transport	24	6.98656e-05	-4.15574	cox8a, mt-co2, cycsb, prkn, cyc1, mt-nd4, ndufs6, mt-cyb, cox5ab, cox6a1, ndufa7, ndufb9, mt-nd5, mt-nd2, cox7c, uqcrh, cox4i1, ndufv2, cox5aa, sdhc, ndufc2, ndufb8, uqcrq, COX5B	3383	43	13373	2.20633	0.00728288	0.00714315
GOTERM_BP	GO:0009141~nucleoside triphosphate metabolic process	61	9.63639e-05	-4.01609	cox8a, pfklb, cycsb, dtymk, mt-nd4, ndufs6, mt-atp6, ctps1b, atp5pf, mt-nd5, dlst, nme3, cox5aa, sdhc, hk2, atp5l, atp5f1d, ndufb8, itpa, cmpk, atp6v0a1b, cyc1, pgam1a, atp5po, cox5ab, mt-cyb, eno3, mt-nd2, atp6v0a2b, cox4i1, atp5meb, COX5B, tcirg1b, atp5mc1, pfkla, atp5f1e, atp5f1c, cox6a1, impdh2, ndufa7, ndufb9, cox7c, uqcrh, ndufv2, ndufc2, gphnb, uqcrq, hkdc1, ctps1a, atp5pd, suclg1, nme2b.1…	3383	153	13373	1.57603	0.00956804	0.00938446
GOTERM_BP	GO:0000470~maturation of LSU-rRNA	17	9.81175e-05	-4.00825	rsl1d1, snu13b, rpf1, rpl7a, eif6, wdr12, rpf2, rpl10a, nop2, mak16, ftsj3, rrp15, rpl7l1, rpl7, rpl35, nhp2, mrpl1	3383	26	13373	2.58465	0.00956804	0.00938446
GOTERM_BP	GO:0006120~mitochondrial electron transport, NADH to ubiquinone	9	0.000116078	-3.93525	ndufa7, ndufb9, mt-nd2, ndufv2, prkn, mt-nd4, ndufc2, ndufb8, ndufs6	3383	9	13373	3.953	0.0109657	0.0107553
GOTERM_BP	GO:0006260~DNA replication	49	0.000212397	-3.67285	orc4, e2f7, mcm10, primpol, parp1, mcm6, rad51, rfc2, fen1, mcm4, chaf1a, gins3, rfc3, cdc6, pcna, si:dkey-28b4.7, nfixa, mcm3, orc5, rfc4, rpa2, tipin, prim2, pold1, orc3, mcmbp, rnaseh2a, nfic, cenpx, ssbp1, parp2, kin, gins2, nfixb, mcm5, rrm1, dscc1, mcm2, gmnn, cenps, mcm8, gins4, rpa3, pola2, lrwd1, nfia, zgc:110269, lig1, ctc1	3383	119	13373	1.62771	0.0188459	0.0184843
GOTERM_BP	GO:0031175~neuron projection development	150	0.000217079	-3.66338	lrrc38a, zgc:100846, mvp, crmp1, boc, amigo1, sema3fb, sema4ga, extl3, nyap2a, sema3h, plxna3, slbp, lingo1a, kif26ba, srrm4, neo1a, pik3cd, clns1a, thy1, alcamb, LRRC4C (1 of many), plxna4, camsap1a, epha4b, vegfaa, unc119.2, lrfn5a, gap43, notch3, mycbp2, cntn1b, etv5b, btbd3b, col6a4a, pcdh18b, sgk2b, ppp1r9a, nckap1, btbd3a, llph, notch1b, si:ch211-195b13.1, cntn3a.1, manf, map4l, SEMA4F, si:…	3383	457	13373	1.29748	0.0188459	0.0184843
GOTERM_BP	GO:0044265~cellular macromolecule catabolic process	158	0.000218196	-3.66115	usp20, psme1, exosc6, socs5b, dnase1l4.1, psmc6, polr2d, fbxo31, ccnf, btbd11b, usp43a, psmd4b, rnf7, psmb10, psmd12, erlec1, btbd3b, rnf181, ctsba, btbd3a, psma5, usp13, cdc34a, kctd17, hecw1b, vps25, magoh, psmd3, smg5, nsfl1c, psmb5, mylipb, psmd6, OTUD7A, psma3, ankzf1, psma6l, rnaset2, lgmn, ctsh, uhrf1, psme3, sdf2l1, ube3b, exosc8, ube2ka, itcha, ranbp1, rnf24, psma6b, usp24, ncbp2, cnot9,…	3383	485	13373	1.28778	0.0188459	0.0184843
GOTERM_BP	GO:0030163~protein catabolic process	136	0.000332658	-3.478	usp20, psme1, socs5b, psmc6, fbxo31, ccnf, btbd11b, usp43a, psmd4b, rnf7, psmb10, psmd12, erlec1, btbd3b, rnf181, ctsba, btbd3a, psma5, usp13, cdc34a, kctd17, hecw1b, vps25, ctsd, psmd3, nsfl1c, psmb5, mylipb, psmd6, OTUD7A, psma3, ankzf1, psma6l, lgmn, ctsh, uhrf1, psme3, sdf2l1, ube3b, ube2ka, itcha, ranbp1, rnf24, clpxa, psma6b, usp24, psma6a, si:ch211-122f10.4, crbn, usp2b, adrm1, uqcc2, abtb…	3383	412	13373	1.30487	0.027934	0.0273981
GOTERM_BP	GO:0009142~nucleoside triphosphate biosynthetic process	28	0.000504681	-3.29698	tcirg1b, atp5mc1, dtymk, atp5f1e, atp5f1c, mt-atp6, impdh2, ctps1b, atp5pf, dlst, nme3, atp5l, atp5f1d, ctps1a, cmpk, atp5pd, suclg1, nme2b.1, atp5mc3b, atp6v0a1b, cyc1, nme5, atp5po, atp5pb, atp5mc3a, atp6v0a2b, atp5meb, COX5B	3383	59	13373	1.876	0.0412338	0.0404427
GOTERM_BP	GO:0044257~cellular protein catabolic process	130	0.000518454	-3.28529	usp20, psme1, socs5b, psmc6, fbxo31, ccnf, btbd11b, usp43a, psmd4b, rnf7, psmb10, psmd12, erlec1, btbd3b, rnf181, ctsba, btbd3a, psma5, usp13, cdc34a, kctd17, hecw1b, vps25, psmd3, nsfl1c, psmb5, mylipb, psmd6, OTUD7A, psma3, ankzf1, psma6l, lgmn, ctsh, uhrf1, psme3, sdf2l1, ube3b, ube2ka, itcha, ranbp1, rnf24, psma6b, usp24, psma6a, si:ch211-122f10.4, crbn, usp2b, adrm1, uqcc2, abtb1, trib3, si:…	3383	395	13373	1.30099	0.0412444	0.040453
GOTERM_BP	GO:0009124~nucleoside monophosphate biosynthetic process	32	0.000553323	-3.25702	tcirg1b, ada, atp5mc1, adssl1, atp5f1e, atp5f1c, mt-atp6, impdh2, atp5pf, adssl, adsl, dlst, gart, atp5l, atp5f1d, umps, ampd3b, atp5pd, ppat, ak2, atp5mc3b, atp6v0a1b, cyc1, atp5po, dctd, atp5pb, atp5mc3a, atp6v0a2b, tyms, atp5meb, adss, COX5B	3383	71	13373	1.78163	0.0428896	0.0420667
GOTERM_BP	GO:0030099~myeloid cell differentiation	61	0.000693557	-3.15892	npc1, ptenb, adnpb, src, jagn1b, rpl27, rpl11, ago2, pdcd2, gpr183a, akap10, rgs18, mitfb, rps14, etv2, csf3a, rps19, kmt2a, numbl, gata1a, abcc5, csf3r, ncor1, tmem178, atp5if1a, lmo2, tal1, irf8, slc25a37, rplp1, spi1b, tert, smad9, ada2b, dre-mir-146a, klf1, rps29, tet2, tp53, rpl35, ncoa2, rps3, clpxa, si:dkey-103e21.5, jagn1a, rps27.1, stat5a, bcl6ab, slc7a7, trim2a, fech, cish, snx3, spi1a,…	3383	163	13373	1.47934	0.0524156	0.0514099
GOTERM_BP	GO:0002262~myeloid cell homeostasis	35	0.000732022	-3.13548	slc25a37, rplp1, adnpb, piezo1, spi1b, tert, rpl27, rpl11, klf1, ago2, rps29, pdcd2, tet2, tp53, rpl35, rps3, clpxa, rps14, rps19, rps27.1, stat5a, kmt2a, fech, cish, snx3, rac2, numbl, gata1a, abcc5, atp5if1a, lmo2, tal1, rpl35a, atp5if1b, klf6a	3383	81	13373	1.70809	0.0539732	0.0529377
GOTERM_BP	GO:1903706~regulation of hemopoiesis	20	0.000894372	-3.04848	stat5a, irf8, cdca7a, irf7, si:ch211-243a20.4, cish, spi1b, gpr65, f2r, gata1a, csf3r, zap70, tmem178, dnmt3bb.1, tfpi2, nfkbiaa, spi1a, mitfb, myd88, rps19	3383	38	13373	2.08053	0.0643735	0.0631384
GOTERM_BP	GO:0051960~regulation of nervous system development	83	0.000923063	-3.03477	sema6e, gli2a, adgrg1, tcf3a, sema4ba, mtor, sema3fb, sema4ga, ssh1a, extl3, sema3h, brinp3a.1, avil, plxna3, neurod2, plxna2, id1, nf1b, pik3cd, dvl1a, gpr183a, thy1, LRRC4C (1 of many), plxna4, sema4gb, lfng, epha4b, unc119.2, notch3, brinp1, kctd12.2, cxcr4b, slit1a, llph, btbd6a, id2a, nf1a, SEMA4F, nsmfa, sema5a, clstn1, dner, sema5ba, ngfrb, il6st, lgals2a, tnr, adgrl1a, dvl1b, sipa1l1, soc…	3383	238	13373	1.37857	0.0648935	0.0636484
GOTERM_BP	GO:0090150~establishment of protein localization to membrane	34	0.000962661	-3.01653	si:ch211-126j24.1, ank1b, ank3b, nsfa, CABZ01109021.1, zgc:56596, tomm7, ank3b, timm13, ssr2, cnsta, srp19, sys1, tspan5b, timm23a, tomm22, sec61b, pacs1a, ank1a, bag6l, timm9, tram2, efr3bb, nsfb, srp9, rilpl2, rab13, ssr3, rftn1a, timm10, tram1, cox18, maip1, tspan5a	3383	79	13373	1.70129	0.0661392	0.0648703
GOTERM_BP	GO:0006753~nucleoside phosphate metabolic process	103	0.00100455	-2.99803	cox8a, pfklb, adssl1, ndufs6, ctps1b, atp5pf, nmnat2, gart, adcy1a, hk2, atp5l, ndufb8, si:ch211-132f19.7, cyc1, pgam1a, nt5c1aa, drd1b, nampta, gucy1b1, tcirg1b, adra2db, pfkla, cox6a1, ndufa7, rrm1, pgd, nos1, adcy6a, uqcrh, ndufv2, cnp, taldo1, uqcrq, dnph1, ppat, mt-co2, mt-co1, nme5, adcy1b, atp5pb, uqcc2, atp5mc3a, cycsb, dtymk, mt-nd4, mt-atp6, mt-nd5, nudt3a, dlst, cox5aa, nme3, sdhc, nud…	3383	307	13373	1.32625	0.0674834	0.0661887
GOTERM_BP	GO:0019693~ribose phosphate metabolic process	85	0.00109401	-2.96098	cox8a, pfklb, cycsb, adssl1, mt-nd4, ndufs6, mt-atp6, ctps1b, atp5pf, mt-nd5, nudt3a, dlst, nme3, gart, cox5aa, sdhc, adcy1a, nudt4a, hk2, umps, atp5l, atp5f1d, ndufb8, ampd3b, paqr7b, hmgcra, si:ch211-132f19.7, atp6v0a1b, cyc1, pgam1a, atp5po, cox5ab, mt-cyb, eno3, mt-nd2, atp6v0a2b, cox4i1, atp5meb, drd1b, adss, COX5B, gucy1b1, tcirg1b, adra2db, atp5mc1, pfkla, atp5f1e, atp5f1c, cox6a1, impdh2,…	3383	246	13373	1.36587	0.0718957	0.0705162
GOTERM_BP	GO:0051603~proteolysis involved in cellular protein catabolic process	127	0.00118165	-2.92751	usp20, psme1, socs5b, psmc6, fbxo31, ccnf, btbd11b, usp43a, psmd4b, rnf7, psmb10, psmd12, erlec1, btbd3b, rnf181, ctsba, btbd3a, psma5, usp13, cdc34a, kctd17, hecw1b, vps25, psmd3, nsfl1c, psmb5, mylipb, psmd6, OTUD7A, psma3, ankzf1, psma6l, lgmn, ctsh, uhrf1, psme3, sdf2l1, ube3b, ube2ka, itcha, ranbp1, rnf24, psma6b, usp24, psma6a, si:ch211-122f10.4, crbn, usp2b, adrm1, abtb1, trib3, si:ch211-5…	3383	392	13373	1.28069	0.076003	0.0745448
GOTERM_BP	GO:0022604~regulation of cell morphogenesis	66	0.00125641	-2.90087	sema6e, grk5l, hdac4, sema4ba, csnk1db, sema3fb, atp6ap1b, sema4ga, ssh1a, extl3, sema3h, plxna3, plxna2, ap1ar, ttbk2a, palmdb, pik3cd, thy1, LRRC4C (1 of many), plxna4, sema4gb, cdc42ep5, epha4b, unc119.2, ttbk1b, ttbk1a, kctd12.2, ttbk2b, cdc42se2, cxcr4b, slit1a, SEMA4F, phip, sema5a, clstn1, sema5ba, ek1, fmnl1a, cdc42ep4b, cyfip1, sipa1l1, tbc1d30, git2a, wipf1b, dpysl2b, l1camb, abcc4, ssh…	3383	183	13373	1.42567	0.0791278	0.0776096
GOTERM_BP	GO:0009117~nucleotide metabolic process	102	0.00135272	-2.86879	cox8a, pfklb, adssl1, ndufs6, ctps1b, atp5pf, nmnat2, gart, adcy1a, hk2, atp5l, ndufb8, si:ch211-132f19.7, cyc1, pgam1a, nt5c1aa, drd1b, nampta, gucy1b1, tcirg1b, adra2db, pfkla, cox6a1, ndufa7, rrm1, pgd, nos1, adcy6a, uqcrh, ndufv2, cnp, taldo1, uqcrq, dnph1, ppat, mt-co2, mt-co1, nme5, adcy1b, atp5pb, uqcc2, atp5mc3a, cycsb, dtymk, mt-nd4, mt-atp6, mt-nd5, nudt3a, dlst, cox5aa, nme3, sdhc, nud…	3383	306	13373	1.31767	0.0834543	0.0818531
GOTERM_BP	GO:0008361~regulation of cell size	38	0.00144467	-2.84023	sema6e, sema4ba, piezo1, sema3fb, sema4ga, extl3, sema3h, plxna3, dpysl2b, plxna2, l1camb, clns1a, pik3cd, aqp3a, plxna4, sema4gb, epha4b, pik3ca, unc119.2, aqp8a.1, aqp7, si:ch211-113g11.6, cntn2, lamtor4, aqp1a.1, l1cama, cxcr4b, slit1a, tnc, plxnc1, SEMA4F, sema5a, apoeb, sema3aa, clstn1, sema5bb, sema5ba, wnt4a	3383	93	13373	1.6152	0.0873446	0.0856688
GOTERM_BP	GO:1902531~regulation of intracellular signal transduction	158	0.00160098	-2.79561	grk5l, iqsec3b, CABZ01005876.1, ptenb, mcf2l2, mtor, tnfrsf11a, syngap1a, cyth1a, CABZ01041494.1, ccl34b.8, gdf11, ARHGEF17, dusp22b, kalrna, nf1b, ABR (1 of many), fgf1a, chn2, LRRC4C (1 of many), ralgapa1, gpr4, arhgef33, obscnb, dia1a, triob, akap11, prex1, scrt2, rragca, si:dkey-91m11.5, tradd, ndrg4, axin1, akip1, fgd4a, map3k12, ankrd6b, gadd45ab, arhgef37, pdgfc, arhgef11, OTUD7A, sipa1l1,…	3383	505	13373	1.23678	0.0948974	0.0930767
GOTERM_BP	GO:0009259~ribonucleotide metabolic process	82	0.00169114	-2.77182	cox8a, pfklb, cycsb, adssl1, mt-nd4, ndufs6, mt-atp6, ctps1b, atp5pf, mt-nd5, nudt3a, dlst, nme3, gart, cox5aa, sdhc, adcy1a, nudt4a, hk2, umps, atp5l, atp5f1d, ndufb8, ampd3b, paqr7b, hmgcra, si:ch211-132f19.7, atp6v0a1b, cyc1, pgam1a, atp5po, cox5ab, mt-cyb, eno3, mt-nd2, atp6v0a2b, cox4i1, atp5meb, drd1b, adss, COX5B, gucy1b1, tcirg1b, adra2db, atp5mc1, pfkla, atp5f1e, atp5f1c, cox6a1, impdh2,…	3383	239	13373	1.35626	0.0983139	0.0964277
GOTERM_BP	GO:0009163~nucleoside biosynthetic process	38	0.00181071	-2.74215	tcirg1b, ada, atp5mc1, adssl1, atp5f1e, atp5f1c, mt-atp6, impdh2, ctps1b, atp5pf, pank1b, ada2b, adssl, adsl, dlst, nme3, atp5l, atp5f1d, umps, ctps1a, atp5pd, nme2b.1, ak2, atp5mc3b, atp6v0a1b, cyc1, mtap, qtrt1, nme5, atp5po, atp5pb, atp5mc3a, atp6v0a2b, atp5meb, adss, pank1a, COX5B, pdcl	3383	94	13373	1.59802	0.102722	0.100751
GOTERM_BP	GO:0055086~nucleobase-containing small molecule metabolic process	115	0.00183493	-2.73638	cox8a, pfklb, adssl1, apip, ndufs6, ctps1b, atp5pf, nmnat2, gart, adcy1a, hk2, atp5l, ndufb8, si:ch211-132f19.7, mtap, cyc1, ahcyl1, pgam1a, nt5c1aa, drd1b, nampta, gucy1b1, tcirg1b, adra2db, si:ch211-201h21.5, pfkla, cox6a1, gda, ndufa7, rrm1, ada2b, pgd, nos1, adcy6a, uqcrh, ndufv2, cnp, taldo1, uqcrq, dnph1, ppat, mt-co2, mt-co1, nme5, adcy1b, atp5pb, uqcc2, atp5mc3a, pdcl, cycsb, dtymk, mt-nd…	3383	354	13373	1.28417	0.102722	0.100751
GOTERM_BP	GO:0002521~leukocyte differentiation	36	0.0019269	-2.71514	irf8, si:ch211-243a20.4, spi1b, gpr18, src, jagn1b, jak3, ada2b, dre-mir-146a, ncoa2, gpr183a, akap10, mitfb, si:dkey-103e21.5, jagn1a, etv2, csf3a, tec, stat5a, ak2, slc7a7, irf7, cish, jak1, gata1a, csf3r, zap70, ncor1, tmem178, si:ch211-214p13.9, spi1a, casp8, rpl22, ikzf1, zgc:194469, agtpbp1	3383	88	13373	1.61714	0.105909	0.103877
GOTERM_BP	GO:0006163~purine nucleotide metabolic process	80	0.0021568	-2.66619	cox8a, pfklb, cycsb, adssl1, mt-nd4, ndufs6, mt-atp6, atp5pf, mt-nd5, nudt3a, dlst, nme3, gart, cox5aa, sdhc, adcy1a, nudt4a, hk2, atp5l, atp5f1d, ndufb8, ampd3b, paqr7b, hmgcra, si:ch211-132f19.7, atp6v0a1b, cyc1, pgam1a, atp5po, cox5ab, mt-cyb, eno3, mt-nd2, atp6v0a2b, cox4i1, atp5meb, drd1b, atic, adss, COX5B, gucy1b1, tcirg1b, adra2db, atp5mc1, pfkla, atp5f1e, atp5f1c, cox6a1, impdh2, pank1b,…	3383	234	13373	1.35145	0.116428	0.114195
GOTERM_BP	GO:0030036~actin cytoskeleton organization	108	0.0024152	-2.61705	cnn3a, gna13a, iqsec3b, pacsin2, cfl1, si:ch73-362m14.4, arpc1a, trpv4, coro1b, arpc1b, sdc4, specc1, xirp2a, obscnb, ppp1r9a, wash1, cdc42bpab, tagln2, ctnna1, ttn.1, tmod1, mylipb, cdc42ep4b, arhgef11, gna12a, ppp1r9ba, wasf1, sipa1l1, wipf1b, pfn2, abl2, pls3, frmd3, fer, zgc:109889, wasb, ache, msrb2, cdc42bpaa, tmod2, arpc5a, ptk2ba, msrb1a, palld, actr3b, cdc42ep4a, parvg, rab13, cxcr4a, ab…	3383	332	13373	1.28592	0.12692	0.124485
GOTERM_BP	GO:0043623~cellular protein complex assembly	87	0.00243513	-2.61348	cacnb1, hcls1, COA4, mis12, capgb, arpc1a, snap47, si:ch211-176g13.8, capza1a, baiap2a, bcs1l, arpc3, eif4bb, ap1ar, tmem33, vbp1, tppp2, arpc1b, ipo4, srp19, cdc42ep5, pick1, psmd4b, TIMM21, pfn1, tmsb4x, atp6v0a1b, elp2, catip, spag1a, SNAP91 (1 of many), wash1, exoc8, atp6v0a2b, pomp, arpc4l, dnm1a, pfdn6, arpc2, coa3a, tcirg1b, ttn.1, arpc5b, tmod1, actr2b, ccdc103, immp2l, cenpx, daw1, cdc42…	3383	259	13373	1.32784	0.12692	0.124485
GOTERM_BP	GO:0072659~protein localization to plasma membrane	19	0.00263846	-2.57865	si:ch211-126j24.1, ank1b, ank3b, pacs1a, ank1a, nsfa, CABZ01109021.1, atp6ap1b, ank3b, efr3bb, nsfb, rab8a, rilpl2, rab13, cnsta, tspan5b, rnf121, sys1, tspan5a	3383	38	13373	1.9765	0.13179	0.129261
GOTERM_BP	GO:0015031~protein transport	171	0.00272606	-2.56446	si:ch73-182a11.2, ap3m1, sec61a1l, zgc:194281, gosr2, cep131, stx6, rab8a, rfx3, tbc1d9, snx9b, cnsta, ipo4, ano1, sec61g, snx27b, tom1, sec22ba, timm8a, TIMM21, chmp1b, stx2a, cplane2, stx12, erlec1, chmp4bb, snx5, si:dkey-181m9.8, exoc4, grtp1a, rab8b, wash1, vps25, axin1, nsfb, srp9, stx18, ssr3, tbc1d1, doc2b, snx11, ranbp3a, ap1g1, immp2l, kpna6, napgb, copz2, tbc1d30, kpna2, timm10b, ap1s3b…	3383	558	13373	1.2114	0.13179	0.129261
GOTERM_BP	GO:1901659~glycosyl compound biosynthetic process	38	0.0027891	-2.55454	tcirg1b, ada, atp5mc1, adssl1, atp5f1e, atp5f1c, mt-atp6, impdh2, ctps1b, atp5pf, pank1b, ada2b, adssl, adsl, dlst, nme3, atp5l, atp5f1d, umps, ctps1a, atp5pd, nme2b.1, ak2, atp5mc3b, atp6v0a1b, cyc1, mtap, qtrt1, nme5, atp5po, atp5pb, atp5mc3a, atp6v0a2b, atp5meb, adss, pank1a, COX5B, pdcl	3383	96	13373	1.56473	0.13179	0.129261
GOTERM_BP	GO:0006818~hydrogen transport	31	0.00279012	-2.55438	tcirg1b, cox8a, atp5mc1, atp6v1g1, atp5f1e, atp5f1c, mt-atp6, atp6ap1b, hvcn1, atp5pf, atp5l, atp5f1d, pm20d1.2, atp6ap1la, atp5pd, atp1a1a.1, atp6v1f, atp5mc3b, atp6v0a1b, cyc1, atp5po, zgc:153317, atp5pb, atpv0e2, atp5mc3a, atp6v0a2b, atp6v1e1b, atp6v0ca, atp5meb, COX5B, atp6v0e1	3383	74	13373	1.65599	0.13179	0.129261
GOTERM_BP	GO:0015992~proton transport	31	0.00279012	-2.55438	tcirg1b, cox8a, atp5mc1, atp6v1g1, atp5f1e, atp5f1c, mt-atp6, atp6ap1b, hvcn1, atp5pf, atp5l, atp5f1d, pm20d1.2, atp6ap1la, atp5pd, atp1a1a.1, atp6v1f, atp5mc3b, atp6v0a1b, cyc1, atp5po, zgc:153317, atp5pb, atpv0e2, atp5mc3a, atp6v0a2b, atp6v1e1b, atp6v0ca, atp5meb, COX5B, atp6v0e1	3383	74	13373	1.65599	0.13179	0.129261
GOTERM_BP	GO:0061387~regulation of extent of cell growth	31	0.00279012	-2.55438	sema6e, sema4ba, sema3fb, sema4ga, extl3, sema3h, plxna3, dpysl2b, plxna2, l1camb, pik3cd, plxna4, sema4gb, epha4b, pik3ca, unc119.2, si:ch211-113g11.6, cntn2, l1cama, cxcr4b, slit1a, tnc, plxnc1, SEMA4F, sema5a, apoeb, sema3aa, clstn1, sema5bb, sema5ba, wnt4a	3383	74	13373	1.65599	0.13179	0.129261
GOTERM_BP	GO:0072657~protein localization to membrane	42	0.00288972	-2.53914	si:ch211-126j24.1, dlg3, ank1b, ank3b, dag1, nsfa, CABZ01109021.1, atp6ap1b, zgc:56596, tomm7, ank3b, timm13, rab8a, ssr2, cnsta, srp19, lin7b, gphnb, sys1, tspan5b, dlg2, timm23a, tomm22, sec61b, pacs1a, ank1a, bag6l, timm9, tram2, efr3bb, nsfb, srp9, rilpl2, rab13, ssr3, rftn1a, timm10, tram1, rnf121, cox18, maip1, tspan5a	3383	109	13373	1.52317	0.133054	0.130501
GOTERM_BP	GO:0000904~cell morphogenesis involved in differentiation	129	0.00290491	-2.53687	zeb2b, lrrc38a, crmp1, boc, sema3fb, sema4ga, extl3, sema3h, plxna3, slbp, lingo1a, kif26ba, srrm4, neo1a, pik3cd, clns1a, thy1, alcamb, LRRC4C (1 of many), plxna4, epha4b, vegfaa, unc119.2, lrfn5a, loxl2b, notch3, mycbp2, etv5b, btbd3b, col6a4a, btbd3a, notch1b, cntn3a.1, SEMA4F, itga5, si:dkey-6n6.1, sema5a, clstn1, slitrk3b, lrfn1, asah1b, tnr, cntn4, cyfip1, map6b, sipa1l1, tet3, stat3, pmm2,…	3383	408	13373	1.24985	0.133054	0.130501
GOTERM_BP	GO:0006270~DNA replication initiation	13	0.00316245	-2.49998	orc3, orc4, cdc6, gins4, mcm3, gins2, mcm10, orc5, pola2, mcm5, mcm6, mcm2, mcm4	3383	22	13373	2.33586	0.140589	0.137892
GOTERM_BP	GO:0034314~Arp2/3 complex-mediated actin nucleation	13	0.00316245	-2.49998	arpc5b, actr2b, arpc5a, arpc4, arpc1a, actr3b, wasa, wash1, arpc3, arpc4l, arpc1b, wasb, arpc2	3383	22	13373	2.33586	0.140589	0.137892
GOTERM_BP	GO:0050767~regulation of neurogenesis	75	0.00324561	-2.4887	sema6e, gli2a, adgrg1, tcf3a, sema4ba, sema3fb, sema4ga, ssh1a, extl3, sema3h, brinp3a.1, avil, plxna3, neurod2, plxna2, id1, nf1b, pik3cd, gpr183a, thy1, LRRC4C (1 of many), plxna4, sema4gb, lfng, epha4b, unc119.2, notch3, brinp1, kctd12.2, cxcr4b, slit1a, llph, btbd6a, id2a, nf1a, SEMA4F, nsmfa, sema5a, clstn1, dner, sema5ba, ngfrb, il6st, lgals2a, tnr, sipa1l1, socs3a, stat3, dpysl2b, l1camb, …	3383	220	13373	1.34761	0.142195	0.139467
GOTERM_BP	GO:0010975~regulation of neuron projection development	47	0.00330783	-2.48046	sema6e, il6st, sema4ba, sipa1l1, sema3fb, sema4ga, ssh1a, extl3, sema3h, socs3a, avil, plxna3, dpysl2b, plxna2, l1camb, pik3cd, thy1, LRRC4C (1 of many), plxna4, ssh2a, sema4gb, epha4b, pik3ca, unc119.2, si:ch211-113g11.6, cntn2, kctd12.2, clcf1, l1cama, cxcr4b, slit1a, llph, tnc, si:ch211-278a6.1, plxnb3, plxnc1, SEMA4F, plxnb1b, sema5a, apoeb, sema3aa, clstn1, sema5bb, rgma, sema5ba, wnt4a, ngf…	3383	126	13373	1.47453	0.142851	0.14011
GOTERM_BP	GO:0031103~axon regeneration	14	0.00372691	-2.42865	il6st, gap43, cntn2, clcf1, hmgb1a, lgmn, socs3a, lingo1a, dpysl2b, tnc, l1camb, cnp, rgma, epha4b	3383	25	13373	2.21368	0.158682	0.155638
GOTERM_BP	GO:0030516~regulation of axon extension	28	0.00381869	-2.41809	sema6e, sema4ba, sema3fb, sema4ga, extl3, sema3h, plxna3, dpysl2b, plxna2, l1camb, plxna4, sema4gb, epha4b, unc119.2, si:ch211-113g11.6, cntn2, l1cama, cxcr4b, slit1a, tnc, plxnc1, SEMA4F, sema5a, apoeb, sema3aa, sema5bb, sema5ba, wnt4a	3383	66	13373	1.67703	0.160332	0.157256
GOTERM_BP	GO:0045454~cell redox homeostasis	26	0.00395569	-2.40278	pdia4, tmx1, txn, prdx6, qsox1, txndc12, txnl1, prdx3, prdx1, erp44, zgc:56493, pdia5, glrx, irf1b, qsox2, pdia6, dnajc16, txn2, p4hb, prdx2, zgc:153284, aifm3, zgc:152951, txnrd2.2, prdx4, pdia3	3383	60	13373	1.71297	0.16206	0.158951
GOTERM_BP	GO:0061515~myeloid cell development	25	0.00400287	-2.39763	npc1, irf8, slc25a37, ptenb, adnpb, spi1b, src, tert, smad9, rpl11, rps29, tp53, clpxa, rps14, csf3a, rps19, stat5a, kmt2a, slc7a7, fech, gata1a, tpma, lmo2, tal1, klf6a	3383	57	13373	1.73377	0.16206	0.158951
GOTERM_BP	GO:0010769~regulation of cell morphogenesis involved in differentiation	43	0.00402069	-2.3957	sema6e, hdac4, sema4ba, sipa1l1, sema3fb, sema4ga, ssh1a, extl3, sema3h, plxna3, dpysl2b, plxna2, l1camb, ap1ar, pik3cd, thy1, LRRC4C (1 of many), plxna4, ssh2a, sema4gb, epha4b, pik3ca, unc119.2, si:ch211-113g11.6, cntn2, kctd12.2, l1cama, cxcr4b, slit1a, tnc, si:ch211-278a6.1, plxnb3, plxnc1, SEMA4F, plxnb1b, sema5a, apoeb, sema3aa, clstn1, sema5bb, ek1, sema5ba, wnt4a	3383	114	13373	1.49104	0.16206	0.158951
GOTERM_BP	GO:1990542~mitochondrial transmembrane transport	15	0.00419709	-2.37705	timm23a, TIMM21, tomm22, cyc1, timm9, tomm7, timm13, timm50, tomm40l, dnlz, timm10, tomm20b, mcu, COX5B, vdac2	3383	28	13373	2.11768	0.166945	0.163742
GOTERM_BP	GO:1903707~negative regulation of hemopoiesis	7	0.00448918	-2.34783	f2r, tmem178, nfkbiaa, irf7, cish, spi1b, gpr65	3383	8	13373	3.45888	0.17402	0.170681
GOTERM_BP	GO:2000145~regulation of cell motility	59	0.00455774	-2.34125	sema6e, vegfbb, ccsapa, ptenb, sema4ba, ppp2r3a, foxj1a, rtn4a, sema3fb, sema4ga, sema3h, sst6, plxna3, plxna2, smad5, mmp14b, fgf1a, ap1ar, ptp4a1, gpr183a, thy1, ccsapb, plxna4, cnn2, sema4gb, vegfaa, cxcr4b, SEMA4F, nsmfa, robo4, sema5a, sinhcaf, inppl1a, sema5ba, ngfrb, pdgfc, prkcz, anxa5b, cxcl18b, srgap3, fer, wasb, si:ch211-113g11.6, arrb1, srgap1b, rac2, ptk2ba, inpp5d, tgfb1a, zap70, si…	3383	168	13373	1.38826	0.17402	0.170681
GOTERM_BP	GO:0045664~regulation of neuron differentiation	59	0.00455774	-2.34125	sema6e, tcf3a, sema4ba, sema3fb, sema4ga, ssh1a, extl3, sema3h, brinp3a.1, avil, plxna3, neurod2, plxna2, id1, pik3cd, thy1, LRRC4C (1 of many), plxna4, sema4gb, lfng, epha4b, unc119.2, brinp1, kctd12.2, cxcr4b, slit1a, llph, id2a, SEMA4F, sema5a, clstn1, sema5ba, ngfrb, il6st, sipa1l1, socs3a, dpysl2b, l1camb, mecp2, ssh2a, pik3ca, gnl3, mib1, si:ch211-113g11.6, cntn2, clcf1, l1cama, brinp2, tnc…	3383	168	13373	1.38826	0.17402	0.170681
GOTERM_BP	GO:0034645~cellular macromolecule biosynthetic process	773	0.00460523	-2.33675	rps18, mrpl23, mrps17, med31, nr1d2b, rplp2l, mcm6, polr3d, nhp2, nmt1b, mitfb, polr3k, slc25a48, rps21, irf5, pcna, eif3d, tnrc18, atf7b, rps2, hivep1, pbx3a, tp53inp2, jdp2b, cenpx, rps11, rps27.2, galn, scai, mbtd1, ezh2, uhrf1, slc25a25a, sdf2l1, znf536, rpl30, hlx1, ago3a, dre-mir-21-2, nfat5b, eef2b, mcm2, si:dkey-239n17.4, dachd, stat5a, irf7, eif2s2, vars, dpy19l3, cbfa2t3, nr4a1, nr1d2a,…	3383	2840	13373	1.07594	0.17402	0.170681
GOTERM_BP	GO:0048812~neuron projection morphogenesis	115	0.00554915	-2.25577	lrrc38a, crmp1, boc, sema3fb, sema4ga, extl3, nyap2a, sema3h, plxna3, slbp, lingo1a, kif26ba, srrm4, neo1a, pik3cd, clns1a, thy1, alcamb, plxna4, epha4b, vegfaa, unc119.2, lrfn5a, notch3, mycbp2, etv5b, btbd3b, col6a4a, pcdh18b, sgk2b, nckap1, btbd3a, llph, notch1b, si:ch211-195b13.1, cntn3a.1, SEMA4F, si:dkey-6n6.1, sema5a, clstn1, slitrk3b, lrfn1, asah1b, tnr, cntn4, cyfip1, map6b, stat3, dpysl…	3383	365	13373	1.24547	0.2071	0.203126
GOTERM_BP	GO:0031167~rRNA methylation	9	0.00607151	-2.2167	nsun5, emg1, ftsj3, mrm1, trmt112, nop2, fdxacb1, fbl, mettl16	3383	13	13373	2.73669	0.223831	0.219537
GOTERM_BP	GO:0090002~establishment of protein localization to plasma membrane	16	0.00662595	-2.17875	si:ch211-126j24.1, ank1b, ank3b, pacs1a, ank1a, nsfa, CABZ01109021.1, ank3b, efr3bb, nsfb, rilpl2, rab13, cnsta, tspan5b, sys1, tspan5a	3383	32	13373	1.9765	0.241328	0.236698
GOTERM_BP	GO:0016197~endosomal transport	32	0.00812423	-2.09022	dopey2, snx27a, mical3a, rbsn, ap5s1, vps26bl, bloc1s1, rab11fip3, snf8, snx1b, gosr2, ehd1b, ap1ar, vps53, ehd2b, vps29, arl1, sys1, snx27b, ehd3, snx1a, ehd1a, vti1a, rab9b, ANKRD50, fam160a2, hook1, rab14l, wash1, vps25, rab13, clstn1	3383	82	13373	1.54263	0.292375	0.286766
GOTERM_BP	GO:0043087~regulation of GTPase activity	53	0.00847882	-2.07166	pkp4, efna5b, syngap1a, gapvd1, tiam1b, ccl34b.8, tbc1d9, arhgap35b, iqgap2, plxna2, plxnb2b, nf1b, ABR (1 of many), tbc1d9, chn2, tbc1d10ab, ralgapa1, ralgapa2, myo9b, tbc1d2b, tbc1d22b, grtp1a, si:dkey-91m11.5, nf1a, ralgapb, tbc1d2, tbc1d1, ek1, dennd6aa, RAP1GDS1, rasgrp3, sipa1l1, tbc1d30, sgsm1a, bcr, elmod1, RUNDC1, rasal3, ranbp1, dab2ipa, rasgef1bb, plxna1a, sgsm1b, ccl34b.9, iqgap1, lam…	3383	152	13373	1.37835	0.301547	0.295761
GOTERM_BP	GO:0000902~cell morphogenesis	200	0.00933155	-2.03005	grk5l, boc, foxj1a, cfl1, sema3fb, atp6ap1b, extl3, nyap2a, sema3h, plxna3, cep131, srrm4, ttbk2a, palmdb, pik3cd, alcamb, vegfaa, unc119.2, cplane2, ttbk2b, btbd3b, nckap1, nphp3, btbd3a, llph, notch1b, si:dkey-6n6.1, clstn1, tagln2, daw1, cyfip1, gna12a, ttll6, sipa1l1, wipf1b, nos1, pik3ca, ehd3, si:ch211-113g11.6, zdhhc17, atp6v1f, jazf1b, dnmbp, egr2b, ulk1b, adcy1b, fibpb, si:ch211-278a6.1,…	3383	681	13373	1.16094	0.328015	0.321722
GOTERM_BP	GO:0048821~erythrocyte development	17	0.00954272	-2.02033	stat5a, kmt2a, slc25a37, fech, adnpb, spi1b, tert, gata1a, rpl11, rps29, lmo2, tp53, tal1, clpxa, rps14, klf6a, rps19	3383	36	13373	1.86669	0.331582	0.32522
GOTERM_BP	GO:0048666~neuron development	175	0.0100168	-1.99927	lrrc38a, ccsapa, zgc:100846, mvp, crmp1, boc, amigo1, sema3fb, sema4ga, extl3, nyap2a, sema3h, plxna3, slbp, lingo1a, kif26ba, srrm4, rab8a, neo1a, pik3cd, clns1a, thy1, alcamb, LRRC4C (1 of many), plxna4, camsap1a, epha4b, vegfaa, unc119.2, lrfn5a, gap43, notch3, mycbp2, cntn1b, adgrv1, etv5b, btbd3b, col6a4a, pcdh18b, sgk2b, ppp1r9a, nckap1, btbd3a, llph, notch1b, si:ch211-195b13.1, cntn3a.1, m…	3383	590	13373	1.1725	0.336772	0.33031
GOTERM_BP	GO:0031334~positive regulation of protein complex assembly	27	0.0100263	-1.99886	psmc1a, arpc5b, actr2b, cdc42ep4b, arpc4, wipf1b, arpc1a, wasa, baiap2a, arpc3, ap1ar, psmc6, arpc1b, wasb, cdc42ep5, vegfaa, pick1, psmc1b, arpc5a, psmc2, actr3b, psmc5, wash1, cdc42ep4a, arpc4l, psmc4, arpc2	3383	67	13373	1.593	0.336772	0.33031
GOTERM_BP	GO:0035162~embryonic hemopoiesis	27	0.0100263	-1.99886	dpy30, slc11a2, slc25a37, myct1a, cx43, snrkb, klf1, tet2, ncoa2, etv2, csf3a, arrb1, trim2a, numbl, cebpa, socs1a, gata1a, rps24, csf3r, bmi1a, chrd, lmo2, scube1, yap1, tal1, nop10, mta3	3383	67	13373	1.593	0.336772	0.33031
GOTERM_BP	GO:0048588~developmental cell growth	38	0.0104814	-1.97958	sema6e, asah1b, sema4ba, cyfip1, sema3fb, sema4ga, sema3h, plxna3, plxna2, nos1, l1camb, fam53b, tppp2, clns1a, pik3cd, plxna4, sema4gb, epha4b, pik3ca, unc119.2, grna, si:ch211-113g11.6, cntn2, l1cama, slit1a, llph, ulk1b, tnc, katna1, plxnc1, SEMA4F, plxnb1b, sema5a, sema3aa, sema5bb, sema5ba, wnt4a, gemin2	3383	103	13373	1.45839	0.348191	0.341511
GOTERM_BP	GO:0050770~regulation of axonogenesis	37	0.0110515	-1.95658	sema6e, sema4ba, sema3fb, sema4ga, ssh1a, extl3, sema3h, plxna3, dpysl2b, plxna2, l1camb, pik3cd, thy1, LRRC4C (1 of many), plxna4, ssh2a, sema4gb, epha4b, pik3ca, unc119.2, si:ch211-113g11.6, cntn2, l1cama, cxcr4b, slit1a, tnc, plxnb3, plxnc1, SEMA4F, plxnb1b, sema5a, apoeb, sema3aa, clstn1, sema5bb, sema5ba, wnt4a	3383	100	13373	1.46261	0.363139	0.356172
GOTERM_BP	GO:0043241~protein complex disassembly	24	0.011185	-1.95136	mical1, tmod1, mical3a, tmod2, nes, cfl1, capgb, stmn4l, etf1b, napab, eif5a2, ogfod1, apc2, cfl1l, capza1a, eif5a, stmn3, kif18a, gspt1l, ccsapb, apc, napba, stmn4, cfl2	3383	58	13373	1.63572	0.363574	0.356598
GOTERM_BP	GO:0031102~neuron projection regeneration	17	0.012938	-1.88813	il6st, gap43, cntn2, mvp, clcf1, hmgb1a, csrp1a, lgmn, socs3a, lingo1a, dpysl2b, tnc, l1camb, apoeb, cnp, rgma, epha4b	3383	37	13373	1.81624	0.411699	0.4038
GOTERM_BP	GO:0060216~definitive hemopoiesis	17	0.012938	-1.88813	gar1, dkc1, kri1, cebpa, ube2ib, gata1a, rps24, csf3r, haus3, rpl22l1, camk4, znf574, tp53, sumo2b, tal1, sae1, metap2b	3383	37	13373	1.81624	0.411699	0.4038
GOTERM_BP	GO:0060627~regulation of vesicle-mediated transport	50	0.0132703	-1.87712	doc2a, ptbp1a, aak1b, rab5ab, stx1b, pacsin2, syt2a, rims3, cacna1ha, tbc1d9, rab4b, syt7a, syt5b, tbc1d9, syt16, cacna1i, tbc1d10ab, pacsin1a, syt3, rims1b, notch3, cplane2, tbc1d2b, tbc1d22b, grtp1a, rab27b, tbc1d2, tbc1d1, doc2b, doc2d, tbc1d30, dmxl2, sgsm1a, abl2, pacsin1b, fer, RUNDC1, mib1, sgsm1b, stxbp5b, uvrag, sept5b, sgsm2, rims1a, stxbp5a, evi5b, zap70, syt6b, hck, scamp5a	3383	145	13373	1.3631	0.417597	0.409585
GOTERM_BP	GO:0043632~modification-dependent macromolecule catabolic process	105	0.0134515	-1.87123	usp20, socs5b, psmc6, fbxo31, ccnf, btbd11b, usp43a, psmd4b, rnf7, psmd12, erlec1, btbd3b, rnf181, btbd3a, psma5, usp13, cdc34a, kctd17, hecw1b, vps25, psmd3, nsfl1c, mylipb, psmd6, OTUD7A, psma3, ankzf1, psma6l, uhrf1, sdf2l1, ube3b, exosc8, ube2ka, itcha, ranbp1, rnf24, psma6b, usp24, psma6a, crbn, usp2b, adrm1, abtb1, trib3, si:ch211-59o9.10, ube2d1b, uchl3, RNF5, psmd4a, ubxn1, herc4, usp18, …	3383	339	13373	1.22438	0.417597	0.409585
GOTERM_BP	GO:0090151~establishment of protein localization to mitochondrial membrane	6	0.0135377	-1.86845	timm13, timm23a, tomm22, timm10, timm9, tomm7	3383	7	13373	3.38829	0.417597	0.409585
GOTERM_BP	GO:0007015~actin filament organization	58	0.0140575	-1.85209	gna13a, mical3a, hcls1, cfl1, capgb, arpc1a, cfl1l, vaspb, si:ch211-176g13.8, capza1a, baiap2a, trpv4, arpc3, ap1ar, arpc1b, pacsin1a, sdc4, cdc42ep5, mical1, pick1, sorbs2a, pfn1, tmsb4x, ppp1r9a, catip, fhod3b, wash1, ppp1r9bb, arpc4l, arpc2, ctnna1, ttn.1, arpc5b, tmod1, actr2b, cdc42ep4b, ppp1r9ba, vaspa, arhgef11, gna12a, fryb, arpc4, wipf1b, pfn2, wasa, pacsin1b, pls3, wasb, frya, msrb2, tm…	3383	173	13373	1.32528	0.429249	0.421014
GOTERM_BP	GO:0045333~cellular respiration	32	0.014363	-1.84275	cox8a, cycsb, mt-nd4, ndufs6, mt-co3, cox6a1, d2hgdh, ndufa7, ndufb9, mt-nd5, cox7c, dlst, uqcrh, ogdhb, ndufv2, cox5aa, sdhc, ndufc2, ndufb8, uqcrq, suclg1, mt-co2, cyc1, prkn, mt-co1, mt-cyb, cox5ab, mt-nd2, cox4i1, ndufa5, mt-nd1, COX5B	3383	85	13373	1.48819	0.434193	0.425863
GOTERM_BP	GO:0048667~cell morphogenesis involved in neuron differentiation	106	0.0151624	-1.81923	lrrc38a, crmp1, boc, sema3fb, sema4ga, extl3, sema3h, plxna3, slbp, lingo1a, kif26ba, srrm4, neo1a, pik3cd, clns1a, thy1, alcamb, plxna4, epha4b, vegfaa, unc119.2, lrfn5a, notch3, mycbp2, etv5b, btbd3b, col6a4a, btbd3a, notch1b, cntn3a.1, SEMA4F, si:dkey-6n6.1, sema5a, clstn1, slitrk3b, lrfn1, asah1b, tnr, cntn4, cyfip1, map6b, stat3, dpysl2b, pls3, nos1, fam53b, pik3ca, map6a, kif5c, si:ch211-11…	3383	344	13373	1.21808	0.449693	0.441065
GOTERM_BP	GO:1990138~neuron projection extension	34	0.0153914	-1.81272	sema6e, sema4ba, cyfip1, sema3fb, sema4ga, sema3h, plxna3, plxna2, l1camb, fam53b, tppp2, clns1a, plxna4, sema4gb, epha4b, unc119.2, grna, si:ch211-113g11.6, cntn2, l1cama, slit1a, llph, ulk1b, tnc, katna1, plxnc1, SEMA4F, plxnb1b, sema5a, sema3aa, sema5bb, sema5ba, wnt4a, gemin2	3383	92	13373	1.46089	0.449693	0.441065
GOTERM_BP	GO:0070489~T cell aggregation	21	0.0156195	-1.80633	tec, ada, irf7, tnfaip8l2b, cd83, fynb, gpr18, jak1, tnfaip8l2a, cd74a, dusp3a, jak3, zap70, rc3h1a, gpr183a, thy1, rpl22, ikzf1, il12a, rc3h1b, agtpbp1	3383	50	13373	1.66026	0.449693	0.441065
GOTERM_BP	GO:0070486~leukocyte aggregation	21	0.0156195	-1.80633	tec, ada, irf7, tnfaip8l2b, cd83, fynb, gpr18, jak1, tnfaip8l2a, cd74a, dusp3a, jak3, zap70, rc3h1a, gpr183a, thy1, rpl22, ikzf1, il12a, rc3h1b, agtpbp1	3383	50	13373	1.66026	0.449693	0.441065
GOTERM_BP	GO:0007159~leukocyte cell-cell adhesion	21	0.0156195	-1.80633	tec, ada, irf7, tnfaip8l2b, cd83, fynb, gpr18, jak1, tnfaip8l2a, cd74a, dusp3a, jak3, zap70, rc3h1a, gpr183a, thy1, rpl22, ikzf1, il12a, rc3h1b, agtpbp1	3383	50	13373	1.66026	0.449693	0.441065
GOTERM_BP	GO:1901293~nucleoside phosphate biosynthetic process	60	0.0159425	-1.79744	adssl1, dtymk, mt-atp6, ctps1b, atp5pf, nmnat2, dlst, nme3, gart, adcy1a, erh, umps, atp5l, atp5f1d, ampd3b, cmpk, paqr7b, si:ch211-132f19.7, atp6v0a1b, cyc1, atp5po, atp6v0a2b, tyms, atp5meb, drd1b, nampta, atic, adss, COX5B, gucy1b1, tcirg1b, adra2db, ada, atp5mc1, atp5f1e, atp5f1c, impdh2, pank1b, rrm1, adssl, adsl, nos1, adcy6a, npr1a, ctps1a, atp5pd, suclg1, nme2b.1, naprt, ppat, ak2, atp5mc…	3383	181	13373	1.31039	0.454661	0.445938
GOTERM_BP	GO:0071526~semaphorin-plexin signaling pathway	20	0.0161009	-1.79315	sema6e, plxna1a, si:ch211-113g11.6, sema4ba, sema3fb, sema4ga, sema3h, plxna3, plxna2, plxnb2b, plxnb3, plxnc1, SEMA4F, plxnb1b, sema5a, sema3aa, sema5bb, sema5ba, plxna4, sema4gb	3383	47	13373	1.68213	0.454887	0.44616
GOTERM_BP	GO:0006662~glycerol ether metabolic process	5	0.0162967	-1.7879	agmo, txn, txn2, txnl1, zgc:56493	3383	5	13373	3.953	0.456157	0.447405
GOTERM_BP	GO:0030334~regulation of cell migration	53	0.0165412	-1.78143	sema6e, vegfbb, ptenb, sema4ba, rtn4a, sema3fb, sema4ga, sema3h, sst6, plxna3, plxna2, smad5, mmp14b, fgf1a, ptp4a1, gpr183a, thy1, plxna4, cnn2, sema4gb, vegfaa, cxcr4b, SEMA4F, nsmfa, robo4, sema5a, sinhcaf, inppl1a, sema5ba, ngfrb, pdgfc, prkcz, cxcl18b, srgap3, fer, wasb, si:ch211-113g11.6, arrb1, srgap1b, rac2, ptk2ba, inpp5d, tgfb1a, zap70, si:ch211-278a6.1, plxnb3, elp6, plxnc1, plxnb1b, s…	3383	157	13373	1.33445	0.458753	0.449952
GOTERM_BP	GO:0097190~apoptotic signaling pathway	41	0.0167369	-1.77633	dap, bnip3la, g0s2, zgc:171482, znf385a, tnfrsf11a, xrcc5, mcl1a, src, ctsh, znf385b, tnfrsf9a, mcl1b, rps29, baxb, tp53, zgc:153631, si:dkey-103e21.5, zmat3, rps19, bnip3, zgc:153993, cflara, relt, fas, si:dkey-23c22.5, bcl2l1, bag6l, nme5, scrt2, apaf1, baxa, zgc:153759, hdr, casp8, p4hb, ddit3, tnfrsf1a, ngfrb, zgc:194469, crip1	3383	116	13373	1.39718	0.45996	0.451135
GOTERM_BP	GO:0048841~regulation of axon extension involved in axon guidance	18	0.0169144	-1.77174	unc119.2, sema6e, si:ch211-113g11.6, sema4ba, sema3fb, sema4ga, sema3h, plxna3, plxna2, plxnc1, SEMA4F, sema5a, sema3aa, sema5bb, sema5ba, wnt4a, plxna4, sema4gb	3383	41	13373	1.73546	0.46065	0.451811
GOTERM_BP	GO:0016482~cytosolic transport	17	0.0172069	-1.7643	dopey2, snx1a, vti1a, rbsn, vps26bl, rab9b, fam160a2, hook1, snx1b, rab14l, wash1, gosr2, ap1ar, vps53, vps29, arl1, sys1	3383	38	13373	1.76845	0.464432	0.455522
GOTERM_BP	GO:0032956~regulation of actin cytoskeleton organization	42	0.018281	-1.738	arpc5b, tmod1, actr2b, gna13a, cdc42ep4b, efna5b, rictorb, arhgef11, gna12a, capgb, arpc4, ssh1a, wipf1b, pfn2, arpc1a, wasa, si:ch211-176g13.8, capza1a, baiap2a, arpc3, rock2a, ap1ar, triobpb, arpc1b, wasb, cdc42ep5, ssh2a, pick1, pfn1, tmod2, tmsb4x, arpc5a, ptk2ba, triobpa, rhoab, actr3b, wash1, cdc42ep4a, arpc4l, rictora, arpc2, ek1	3383	120	13373	1.38355	0.489056	0.479673
GOTERM_BP	GO:0006887~exocytosis	51	0.0185657	-1.73129	doc2a, ptbp1a, mical3a, stx1b, syt2a, rims3, cacna1ha, snap47, stxbp3, syt7a, scrn3, scfd2, syt5b, rab8a, vmp1, cadpsb, syt16, cacna1i, syt3, sec22ba, rims1b, si:dkey-110c1.7, cadpsa, cplane2, stx11a, exoc4, stxbp2, rab8b, rab27b, exoc8, doc2b, vamp5, adgrl1a, doc2d, fer, exoc3l2b, lin7b, snap23.1, stx4, rab11fip5a, vamp2, si:dkey-245p14.4, dchs1b, stxbp1b, rims1a, vamp3, zap70, exoc5, rab13, syt…	3383	151	13373	1.33512	0.492317	0.482871
GOTERM_BP	GO:0048675~axon extension	33	0.0192387	-1.71582	sema6e, sema4ba, cyfip1, sema3fb, sema4ga, sema3h, plxna3, plxna2, l1camb, fam53b, tppp2, clns1a, plxna4, sema4gb, epha4b, unc119.2, grna, si:ch211-113g11.6, cntn2, l1cama, slit1a, ulk1b, tnc, katna1, plxnc1, SEMA4F, plxnb1b, sema5a, sema3aa, sema5bb, sema5ba, wnt4a, gemin2	3383	90	13373	1.44943	0.505728	0.496025
GOTERM_BP	GO:1903532~positive regulation of secretion by cell	10	0.0207696	-1.68257	cacna1ha, zap70, rab27b, ptbp1a, cacna1i, ano1, CABZ01088346.1, doc2b, mcu, scamp5a	3383	18	13373	2.19611	0.541264	0.530879
GOTERM_BP	GO:0061564~axon development	109	0.0212424	-1.6728	lrrc38a, zgc:100846, crmp1, boc, amigo1, sema3fb, sema4ga, extl3, sema3h, plxna3, slbp, lingo1a, kif26ba, srrm4, neo1a, pik3cd, clns1a, thy1, alcamb, plxna4, epha4b, vegfaa, unc119.2, lrfn5a, gap43, notch3, mycbp2, etv5b, col6a4a, notch1b, cntn3a.1, SEMA4F, si:dkey-6n6.1, sema5a, clstn1, slitrk3b, lrfn1, il6st, asah1b, tnr, cntn4, cyfip1, socs3a, lgmn, stat3, dpysl2b, pls3, nos1, fam53b, cnp, pik…	3383	359	13373	1.20021	0.548853	0.538322
GOTERM_BP	GO:0009966~regulation of signal transduction	254	0.0224442	-1.6489	grk5l, iqsec3b, ppp2r3a, boc, pak1ip1, mtor, extl3, CABZ01041494.1, sox4a, ccl34b.8, gdf11, fgf1a, nlk2, ralgapa1, gpr4, obscnb, akap11, prex1, spred2b, tradd, sra1, fgd4a, map3k12, lzts2a, mylipb, OTUD7A, gpr18, sipa1l1, socs2, rgs17, MAP3K13, fer, fbxw7, si:ch211-182d3.1, jupa, map2k4a, tgfb2l, arhgef10lb, lamtor4, rap1gap, cnksr2a, rack1, lrrc4ba, nme5, dkk2, dnmbp, ugdh, tgfb1a, arfgef1, socs…	3383	898	13373	1.11811	0.571344	0.560382
GOTERM_BP	GO:0051493~regulation of cytoskeleton organization	54	0.0224909	-1.64799	gna13a, efna5b, capgb, ssh1a, arpc1a, apc2, cep131, si:ch211-176g13.8, capza1a, baiap2a, rock2a, arpc3, ap1ar, arpc1b, ccsapb, ccnf, cdc42ep5, pick1, pfn1, tmsb4x, nes, triobpa, afap1, wash1, arpc4l, rictora, arpc2, apc, ek1, arpc5b, spice1, tmod1, actr2b, cdc42ep4b, rictorb, arhgef11, gna12a, arpc4, stmn4l, wipf1b, pfn2, wasa, stmn3, triobpb, ranbp1, wasb, stmn4, ssh2a, tmod2, arpc5a, ptk2ba, rh…	3383	163	13373	1.30958	0.571344	0.560382
GOTERM_BP	GO:0071806~protein transmembrane transport	15	0.0233684	-1.63137	timm23a, TIMM21, pex5lb, tomm22, sec61b, timm9, tomm7, timm13, timm50, tomm40l, srp9, dnlz, timm10, tomm20b, srp19	3383	33	13373	1.79682	0.583823	0.572621
GOTERM_BP	GO:0065002~intracellular protein transmembrane transport	15	0.0233684	-1.63137	timm23a, TIMM21, pex5lb, tomm22, sec61b, timm9, tomm7, timm13, timm50, tomm40l, srp9, dnlz, timm10, tomm20b, srp19	3383	33	13373	1.79682	0.583823	0.572621
GOTERM_BP	GO:0006886~intracellular protein transport	113	0.0237248	-1.6248	si:ch73-182a11.2, ap3m1, gosr2, cep131, stx6, tbc1d9, snx9b, ipo4, sec61g, snx27b, tom1, TIMM21, stx2a, stx12, erlec1, snx5, grtp1a, vps25, axin1, srp9, stx18, ssr3, tbc1d1, doc2b, snx11, ranbp3a, ap1g1, immp2l, kpna6, napgb, tbc1d30, kpna2, ap1s3b, ank3b, ramp2, rgs17, snx1b, pmm2, nup62l, tomm40l, fam53b, ranbp1, stx4, rph3ab, pex5lb, tomm22, ANKRD50, ank1a, golga4, cd74a, evi5b, snupn, snx18a,…	3383	375	13373	1.19117	0.58787	0.576591
GOTERM_BP	GO:0009165~nucleotide biosynthetic process	58	0.0251337	-1.59974	adssl1, dtymk, mt-atp6, ctps1b, atp5pf, nmnat2, dlst, nme3, gart, adcy1a, erh, umps, atp5l, atp5f1d, ampd3b, cmpk, paqr7b, si:ch211-132f19.7, atp6v0a1b, cyc1, atp5po, atp6v0a2b, tyms, atp5meb, drd1b, nampta, atic, adss, COX5B, gucy1b1, tcirg1b, adra2db, atp5mc1, atp5f1e, atp5f1c, impdh2, pank1b, rrm1, adssl, adsl, nos1, adcy6a, npr1a, ctps1a, atp5pd, nme2b.1, naprt, ppat, ak2, atp5mc3b, NMNAT3, n…	3383	178	13373	1.28806	0.617716	0.605864
GOTERM_BP	GO:1990778~protein localization to cell periphery	20	0.0257047	-1.58999	si:ch211-126j24.1, ank1b, ank3b, pacs1a, ank1a, nsfa, CABZ01109021.1, atp6ap1b, ank3b, efr3bb, nsfb, rab8a, rilpl2, rab13, cnsta, lin7b, tspan5b, rnf121, sys1, tspan5a	3383	49	13373	1.61347	0.626655	0.614632
GOTERM_BP	GO:0051345~positive regulation of hydrolase activity	49	0.0266865	-1.57371	pkp4, cycsb, psme1, tiam1b, ccl34b.8, tbc1d9, nf1b, ABR (1 of many), baxb, tbc1d9, arl1, tbc1d10ab, diablob, vegfaa, ralgapa1, ralgapa2, myo9b, tbc1d2b, tbc1d22b, grtp1a, si:dkey-91m11.5, nf1a, psme2, ralgapb, tbc1d2, pycard, tbc1d1, dennd6aa, RAP1GDS1, tbc1d30, sgsm1a, bcr, ctsh, elmod1, psme3, RUNDC1, tp53, ranbp1, rasgef1bb, sgsm1b, ccl34b.9, lamtor4, sgsm2, apaf1, baxa, chn1, evi5b, lamtor3, …	3383	147	13373	1.31767	0.643063	0.630725
GOTERM_BP	GO:0007009~plasma membrane organization	27	0.0268032	-1.57181	si:ch211-126j24.1, ank1b, ank3b, dag1, pacsin2, nsfa, CABZ01109021.1, atp6ap1b, ank3b, pacsin1b, baiap2a, rab8a, ano3, cav1, cnsta, sys1, pacsin1a, tspan5b, ndrg1a, pacs1a, ank1a, efr3bb, nsfb, rilpl2, rab13, rnf121, tspan5a	3383	72	13373	1.48238	0.643063	0.630725
GOTERM_BP	GO:1902667~regulation of axon guidance	18	0.0278564	-1.55507	unc119.2, sema6e, si:ch211-113g11.6, sema4ba, sema3fb, sema4ga, sema3h, plxna3, plxna2, plxnc1, SEMA4F, sema5a, sema3aa, sema5bb, sema5ba, wnt4a, plxna4, sema4gb	3383	43	13373	1.65474	0.650481	0.638001
GOTERM_BP	GO:0051271~negative regulation of cellular component movement	26	0.0283146	-1.54799	sema6e, ptenb, sema4ba, rtn4a, sema3fb, sema4ga, srgap3, sema3h, smad5, ap1ar, thy1, sema4gb, si:ch211-113g11.6, srgap1b, cxcr4b, inpp5d, tgfb1a, plxnb3, SEMA4F, sema5a, sinhcaf, sema3aa, sema5bb, inppl1a, sema5ba, ngfrb	3383	69	13373	1.48954	0.650481	0.638001
GOTERM_BP	GO:0050900~leukocyte migration	29	0.0284462	-1.54598	vegfbb, cxcl18b, mmp9, CABZ01041494.1, saa, ccl34b.8, jagn1b, fpr1, ch25h, gpr183a, wasb, mitfb, jagn1a, vegfaa, cxcl8b.1, cxcl8a, cyba, coro1a, ccl34b.9, ptk2ba, rac2, cxcr4b, yrk, inpp5d, pik3cg, cxcr3.2, inppl1a, myd88, stk10	3383	79	13373	1.4511	0.650481	0.638001
GOTERM_BP	GO:0060260~regulation of transcription initiation from RNA polymerase II promoter	6	0.0286186	-1.54335	psmc1a, psmc5, psmc1b, psmc6, psmc4, psmc2	3383	8	13373	2.96475	0.650481	0.638001
GOTERM_BP	GO:0060261~positive regulation of transcription initiation from RNA polymerase II promoter	6	0.0286186	-1.54335	psmc1a, psmc5, psmc1b, psmc6, psmc4, psmc2	3383	8	13373	2.96475	0.650481	0.638001
GOTERM_BP	GO:2000142~regulation of DNA-templated transcription, initiation	6	0.0286186	-1.54335	psmc1a, psmc5, psmc1b, psmc6, psmc4, psmc2	3383	8	13373	2.96475	0.650481	0.638001
GOTERM_BP	GO:2000144~positive regulation of DNA-templated transcription, initiation	6	0.0286186	-1.54335	psmc1a, psmc5, psmc1b, psmc6, psmc4, psmc2	3383	8	13373	2.96475	0.650481	0.638001
GOTERM_BP	GO:0072655~establishment of protein localization to mitochondrion	14	0.0314034	-1.50302	timm23a, TIMM21, immp2l, tomm22, timm9, tomm7, mtx3, timm13, timm50, tomm40l, dnlz, timm10, tomm20b, maip1	3383	31	13373	1.78523	0.708452	0.694859
GOTERM_BP	GO:0002244~hematopoietic progenitor cell differentiation	20	0.0318859	-1.4964	mib1, notch3, ak2, cdca7a, irf7, notch1b, f2r, csf3r, dld, dnmt3bb.1, nos1, nfkbiaa, fosab, rps29, pdcd2, tal1, metap2b, myd88, cxcl8a, csf3a	3383	50	13373	1.5812	0.713334	0.699648
GOTERM_BP	GO:0010628~positive regulation of gene expression	96	0.0320918	-1.49361	ncoa3, tcf3a, rai1, med19a, cnbpa, ches1, ilf2, cks1b, e2f7, lpin1, eif5a2, nfkb2, pprc1, smad5, tfeb, fgf1a, psmc6, polr2d, rps9, guf1, si:dkey-156n14.5, si:ch73-60h1.1, kmt5aa, ccnl1a, maml3, nfixa, rps6ka4, gata1a, mafk, eif5a, ccnl1b, egr1, jund, arnt2, ruvbl1, tp53inp2, coa3a, psmc1a, wbp2, dnajc2, nfic, npas4a, jun, spi1b, galn, rel, elocb, tet3, nfixb, rps6ka5, ccnt1, rtraf, hif1aa, tefa, …	3383	317	13373	1.19712	0.713334	0.699648
GOTERM_BP	GO:0009648~photoperiodism	7	0.0361634	-1.44173	npas2, aanat2, clockb, per3, per1a, per2, clocka	3383	11	13373	2.51555	0.792189	0.77699
GOTERM_BP	GO:0045921~positive regulation of exocytosis	7	0.0361634	-1.44173	cacna1ha, zap70, rab27b, ptbp1a, cacna1i, doc2b, scamp5a	3383	11	13373	2.51555	0.792189	0.77699
GOTERM_BP	GO:0046839~phospholipid dephosphorylation	17	0.0365459	-1.43716	plpp4, ptprq, mtmr2, synj1, ptenb, tpte, inpp5d, plppr4a, mtmr8, plppr5b, inpp5jb, plpp3, ppap2d, plppr2a, inppl1a, pip4p1a, sacm1lb	3383	41	13373	1.63905	0.794808	0.779559
GOTERM_BP	GO:0001952~regulation of cell-matrix adhesion	5	0.0391113	-1.4077	ptenb, robo4, efna5b, ek1, vegfaa	3383	6	13373	3.29417	0.844524	0.828321
GOTERM_BP	GO:0030150~protein import into mitochondrial matrix	8	0.0405051	-1.39249	timm23a, TIMM21, timm50, tomm40l, dnlz, tomm22, tomm20b, tomm7	3383	14	13373	2.25886	0.862302	0.845757
GOTERM_BP	GO:0006123~mitochondrial electron transport, cytochrome c to oxygen	8	0.0405051	-1.39249	cox8a, cycsb, cox7c, cox4i1, cox5aa, COX5B, cox5ab, cox6a1	3383	14	13373	2.25886	0.862302	0.845757
GOTERM_BP	GO:0007006~mitochondrial membrane organization	13	0.0421936	-1.37475	bnip3, bnip3la, timm23a, tomm22, timm9, tomm7, samm50, timm13, timm50, timm10, tomm20b, maip1, apooa	3383	29	13373	1.77203	0.863376	0.846811
GOTERM_BP	GO:0009620~response to fungus	13	0.0421936	-1.37475	nsdhl, src, cebpb, jagn1b, ccny, orc1, psmd14, hspa5, atp6v0ca, cyb5r2, mcm4, pank1a, jagn1a	3383	29	13373	1.77203	0.863376	0.846811
GOTERM_BP	GO:0051961~negative regulation of nervous system development	25	0.042363	-1.37301	sema6e, sema4ba, sema3fb, sema4ga, sema3h, socs3a, id1, fbxw7, thy1, lfng, sema4gb, epha4b, notch3, si:ch211-113g11.6, her8a, slit1a, tnc, SEMA4F, sema5a, sema3aa, sema5bb, rgma, dner, sema5ba, ngfrb	3383	68	13373	1.45331	0.863376	0.846811
GOTERM_BP	GO:0003171~atrioventricular valve development	9	0.0427766	-1.36879	ugdh, cemip2, adap2, tmsb4x, pdcd4b, jupa, npnt, pdlim7, dre-mir-21-2	3383	17	13373	2.09276	0.863376	0.846811
GOTERM_BP	GO:0043647~inositol phosphate metabolic process	9	0.0427766	-1.36879	itpk1b, impa2, ptenb, nudt3a, itpk1a, nudt3b, nudt4a, impa1, ppip5k1a	3383	17	13373	2.09276	0.863376	0.846811
GOTERM_BP	GO:1903037~regulation of leukocyte cell-cell adhesion	9	0.0427766	-1.36879	dusp3a, zap70, rc3h1a, irf7, tnfaip8l2b, thy1, il12a, rc3h1b, tnfaip8l2a	3383	17	13373	2.09276	0.863376	0.846811
GOTERM_BP	GO:0050863~regulation of T cell activation	9	0.0427766	-1.36879	dusp3a, zap70, rc3h1a, irf7, tnfaip8l2b, thy1, il12a, rc3h1b, tnfaip8l2a	3383	17	13373	2.09276	0.863376	0.846811
GOTERM_BP	GO:0016358~dendrite development	12	0.0431571	-1.36495	map6a, si:ch211-278a6.1, tmem106bb, prmt8b, kctd12.2, grip1, map6b, sipa1l1, nbeaa, btbd3b, btbd3a, llph	3383	26	13373	1.82446	0.863376	0.846811
GOTERM_BP	GO:0010977~negative regulation of neuron projection development	18	0.0433539	-1.36297	sema6e, si:ch211-113g11.6, sema4ba, sema3fb, sema4ga, sema3h, socs3a, tnc, SEMA4F, sema5a, sema3aa, thy1, sema5bb, rgma, sema5ba, ngfrb, sema4gb, epha4b	3383	45	13373	1.5812	0.863376	0.846811
GOTERM_BP	GO:0031532~actin cytoskeleton reorganization	10	0.0436972	-1.35955	cdc42bpaa, baiap2a, fer, parvg, cdc42bpab, rictorb, rictora, sipa1l1, fryb, frya	3383	20	13373	1.9765	0.863376	0.846811
GOTERM_BP	GO:0000387~spliceosomal snRNP assembly	10	0.0436972	-1.35955	snrpe, snrpd2, snrpc, clns1a, gemin8, snrpd1, lsm4, gemin2, prmt7, coil	3383	20	13373	1.9765	0.863376	0.846811
GOTERM_BP	GO:0072522~purine-containing compound biosynthetic process	47	0.047362	-1.32457	tcirg1b, adra2db, ada, atp5mc1, adssl1, atp5f1e, atp5f1c, mt-atp6, impdh2, atp5pf, pank1b, ada2b, adssl, adsl, nos1, adcy6a, dlst, npr1a, nme3, gart, adcy1a, atp5l, atp5f1d, ampd3b, paqr7b, atp5pd, nme2b.1, si:ch211-132f19.7, ppat, ak2, atp5mc3b, atp6v0a1b, cyc1, mtap, nme5, atp5po, adcy1b, atp5pb, atp5mc3a, atp6v0a2b, atp5meb, atic, adss, drd1b, pank1a, COX5B, gucy1b1	3383	145	13373	1.28132	0.92971	0.911872
GOTERM_BP	GO:0016310~phosphorylation	345	0.0496798	-1.30382	cox8a, ppp1r12c, ppm1e, pfklb, grk5l, adgrg1, taok1b, akap8l, braf, cdkl5, camk2d2, cks1b, pacsin2, mtor, ndufs6, CABZ01041494.1, tie1, ccl34b.8, gdf11, sh3bp5la, snrkb, ttbk2a, nlk2, pik3cd, mibp, hk2, ndufb8, vegfaa, ccnl1a, ttbk2b, pgam1a, erbb4a, ppm1f, bsk146, prkcea, map3k8, efr3bb, camk2a, map3k12, mob1a, ttn.1, chek2, cdc42bpb, camk2d1, gsk3aa, fn3krp, pfkla, ikbkb, si:zfos-2326c3.2, ephb…	3383	1263	13373	1.0798	0.960609	0.942178
GOTERM_BP	GO:0050922~negative regulation of chemotaxis	15	0.0501358	-1.29985	sema6e, si:ch211-113g11.6, sema4ba, cxcr4b, sema3fb, sema4ga, sema3h, inpp5d, SEMA4F, sema5a, sema3aa, sema5bb, inppl1a, sema5ba, sema4gb	3383	36	13373	1.64708	0.960609	0.942178
GOTERM_BP	GO:0045665~negative regulation of neuron differentiation	19	0.0501871	-1.29941	sema6e, si:ch211-113g11.6, sema4ba, sema3fb, sema4ga, sema3h, socs3a, tnc, SEMA4F, sema5a, sema3aa, thy1, sema5bb, rgma, sema5ba, ngfrb, lfng, sema4gb, epha4b	3383	49	13373	1.5328	0.960609	0.942178
GOTERM_BP	GO:0046390~ribose phosphate biosynthetic process	46	0.0502071	-1.29923	tcirg1b, adra2db, atp5mc1, adssl1, atp5f1e, atp5f1c, mt-atp6, impdh2, ctps1b, atp5pf, pank1b, adssl, adsl, nos1, adcy6a, dlst, npr1a, nme3, gart, adcy1a, atp5l, atp5f1d, umps, ampd3b, ctps1a, paqr7b, atp5pd, nme2b.1, si:ch211-132f19.7, ppat, ak2, atp5mc3b, atp6v0a1b, cyc1, nme5, atp5po, adcy1b, atp5pb, atp5mc3a, atp6v0a2b, atp5meb, adss, drd1b, pank1a, COX5B, gucy1b1	3383	142	13373	1.28055	0.960609	0.942178
GOTERM_BP	GO:1903307~positive regulation of regulated secretory pathway	6	0.0511592	-1.29108	cacna1ha, zap70, ptbp1a, cacna1i, doc2b, scamp5a	3383	9	13373	2.63533	0.966589	0.948044
GOTERM_BP	GO:1902285~semaphorin-plexin signaling pathway involved in neuron projection guidance	6	0.0511592	-1.29108	plxna3, plxna2, plxnb3, plxnc1, plxnb1b, plxna4	3383	9	13373	2.63533	0.966589	0.948044
GOTERM_BP	GO:0006461~protein complex assembly	143	0.0523903	-1.28075	cacnb1, kcna4, arpc1a, snap47, eif4bb, psmc6, vbp1, arpc1b, ipo4, vegfaa, psmd4b, TIMM21, p2rx4a, kctd3, SNAP91 (1 of many), wash1, kctd17, exoc8, tcirg1b, ttn.1, kctd6a, si:ch211-103n10.5, tmod1, kctd16a, ccdc103, immp2l, cenpx, daw1, cdc42ep4b, psmd9, asic1a, wipf1b, pfn2, vma21, ckap5, TPPP, wasb, ndufaf4, msrb2, snap23.1, nap1l4a, tmod2, arpc5a, ptk2ba, uvrag, msrb1a, adrm1, actr3b, atpaf2, k…	3383	498	13373	1.1351	0.9722	0.953547
GOTERM_BP	GO:0030952~establishment or maintenance of cytoskeleton polarity	4	0.0524003	-1.28067	mapkap1, rictorb, rictora, ckap5	3383	4	13373	3.953	0.9722	0.953547
GOTERM_BP	GO:0045055~regulated exocytosis	29	0.0526759	-1.27839	doc2a, ptbp1a, adgrl1a, doc2d, stx1b, syt2a, rims3, cacna1ha, snap47, syt7a, syt5b, fer, cadpsb, cacna1i, syt16, snap23.1, stx4, rab11fip5a, syt3, rims1b, si:dkey-110c1.7, cadpsa, dchs1b, stx11a, rims1a, zap70, syt6b, doc2b, scamp5a	3383	83	13373	1.38117	0.9722	0.953547
GOTERM_BP	GO:0048278~vesicle docking	18	0.0530642	-1.2752	stx12, stxbp1b, stx11a, stx1b, nsfa, exoc4, stx12l, stxbp2, rab8b, stxbp3, scfd2, nsfb, rab8a, stx6, exoc5, exoc8, rab13, stx4	3383	46	13373	1.54683	0.9722	0.953547
GOTERM_BP	GO:0031345~negative regulation of cell projection organization	18	0.0530642	-1.2752	sema6e, si:ch211-113g11.6, sema4ba, sema3fb, sema4ga, sema3h, socs3a, tnc, SEMA4F, sema5a, sema3aa, thy1, sema5bb, rgma, sema5ba, ngfrb, sema4gb, epha4b	3383	46	13373	1.54683	0.9722	0.953547
GOTERM_BP	GO:0006626~protein targeting to mitochondrion	13	0.0546164	-1.26268	timm23a, TIMM21, immp2l, tomm22, timm9, tomm7, mtx3, timm13, timm50, tomm40l, dnlz, timm10, tomm20b	3383	30	13373	1.71297	0.989166	0.970188
GOTERM_BP	GO:0098655~cation transmembrane transport	100	0.0546446	-1.26245	slc9a7, cox8a, cacna1ab, cacnb1, kcnk13b, atp6ap1b, atp5pf, slc39a1, cacna1i, thy1, atp5l, kcnj10a, hamp, vdac2, atp6ap1la, kcnk3b, atp1a1a.1, p2rx4a, cyc1, kcnq5a, atp6v0ca, tcirg1b, chrnb3a, rhbg, tmem175, stim2b, slc31a1, trpv1, atp2c1, trpc1, ryr1a, selenon, kcnj11l, bcl2l10, cacnb3a, atp6v1f, kcnk1b, si:dkey-262k9.4, zgc:195170, atp5pb, kcna1a, cacna1c, atp5mc3a, atp6v1e1b, kcnj12a, clic2, m…	3383	339	13373	1.16608	0.989166	0.970188
GOTERM_BP	GO:0050768~negative regulation of neurogenesis	23	0.0563241	-1.24931	sema6e, notch3, si:ch211-113g11.6, sema4ba, her8a, sema3fb, sema4ga, sema3h, socs3a, tnc, id1, SEMA4F, sema5a, sema3aa, thy1, sema5bb, rgma, dner, sema5ba, ngfrb, lfng, sema4gb, epha4b	3383	63	13373	1.44316	1	0.981138
GOTERM_BP	GO:0034333~adherens junction assembly	7	0.0571604	-1.2429	jupb, mibp2, ptenb, ctnnb2, jupa, thy1, vegfaa	3383	12	13373	2.30592	1	0.981138
GOTERM_BP	GO:1901532~regulation of hematopoietic progenitor cell differentiation	7	0.0571604	-1.2429	f2r, csf3r, dnmt3bb.1, cdca7a, nfkbiaa, irf7, myd88	3383	12	13373	2.30592	1	0.981138
GOTERM_BP	GO:0007044~cell-substrate junction assembly	7	0.0571604	-1.2429	mibp2, ptenb, efna5b, thy1, itgb4, ek1, vegfaa	3383	12	13373	2.30592	1	0.981138
GOTERM_BP	GO:0010721~negative regulation of cell development	25	0.0582575	-1.23465	sema6e, sema4ba, cct3, sema3fb, sema4ga, sema3h, socs3a, id1, ap1ar, thy1, lfng, sema4gb, epha4b, notch3, si:ch211-113g11.6, her8a, tnc, SEMA4F, sema5a, sema3aa, sema5bb, rgma, dner, sema5ba, ngfrb	3383	70	13373	1.41179	1	0.981138
GOTERM_BP	GO:1901658~glycosyl compound catabolic process	8	0.0597672	-1.22354	naga, ada2b, ada, nudt3a, si:dkey-4e7.3, nudt3b, si:ch211-201h21.5, nudt4a	3383	15	13373	2.10827	1	0.981138
GOTERM_BP	GO:0051047~positive regulation of secretion	10	0.0597909	-1.22336	cacna1ha, zap70, rab27b, ptbp1a, cacna1i, ano1, CABZ01088346.1, doc2b, mcu, scamp5a	3383	21	13373	1.88238	1	0.981138
GOTERM_BP	GO:0033108~mitochondrial respiratory chain complex assembly	10	0.0597909	-1.22336	TIMM21, uqcc2, immp2l, bcs1l, COA4, coa5, cox17, ndufaf4, ndufs5, coa3a	3383	21	13373	1.88238	1	0.981138
GOTERM_BP	GO:0003170~heart valve development	10	0.0597909	-1.22336	ugdh, cemip2, adap2, tmsb4x, pdcd4b, jupa, npnt, pdlim7, dre-mir-21-2, apc	3383	21	13373	1.88238	1	0.981138
GOTERM_BP	GO:1902105~regulation of leukocyte differentiation	9	0.0603822	-1.21909	irf8, zap70, tmem178, irf7, spi1a, si:ch211-243a20.4, cish, spi1b, mitfb	3383	18	13373	1.9765	1	0.981138
GOTERM_BP	GO:0001889~liver development	39	0.0609078	-1.21533	zeb2b, snx7, gpc1a, e2f7, aldh1a2, nav3, samm50, uhrf1, nup62l, eif3i, nos1, fgfr2, bmp2b, arf6a, mapk10, mpi, gmnn, ppm1k, grna, notch3, tomm22, bms1, dkk2, cebpa, id2a, gfer, tnfb, snapc2, dld, prkcsh, rab23, gpr22a, rarab, arnt2, arf6b, sec13, xbp1, apc, klf6a	3383	119	13373	1.29552	1	0.981138
GOTERM_BP	GO:0097193~intrinsic apoptotic signaling pathway	21	0.0637043	-1.19583	zgc:153993, zgc:171482, znf385a, bcl2l1, bag6l, nme5, xrcc5, scrt2, mcl1a, src, baxa, znf385b, mcl1b, rps29, baxb, tp53, p4hb, ddit3, zmat3, crip1, rps19	3383	57	13373	1.45637	1	0.981138
GOTERM_BP	GO:0030832~regulation of actin filament length	30	0.0650443	-1.18679	arpc5b, tmod1, actr2b, cdc42ep4b, capgb, arpc4, ssh1a, wipf1b, pfn2, arpc1a, wasa, si:ch211-176g13.8, capza1a, baiap2a, arpc3, ap1ar, arpc1b, wasb, cdc42ep5, ssh2a, pick1, pfn1, tmod2, tmsb4x, arpc5a, actr3b, wash1, cdc42ep4a, arpc4l, arpc2	3383	88	13373	1.34761	1	0.981138
GOTERM_BP	GO:0008064~regulation of actin polymerization or depolymerization	30	0.0650443	-1.18679	arpc5b, tmod1, actr2b, cdc42ep4b, capgb, arpc4, ssh1a, wipf1b, pfn2, arpc1a, wasa, si:ch211-176g13.8, capza1a, baiap2a, arpc3, ap1ar, arpc1b, wasb, cdc42ep5, ssh2a, pick1, pfn1, tmod2, tmsb4x, arpc5a, actr3b, wash1, cdc42ep4a, arpc4l, arpc2	3383	88	13373	1.34761	1	0.981138
GOTERM_BP	GO:0034762~regulation of transmembrane transport	45	0.0656379	-1.18285	cacna1ab, clic1, kcnc1b, kcnc3a, cacnb1, scn8ab, cacng8a, cacnb3b, kcnj9, nalcn, scn1laa, cacnb4a, hvcn1, stim2b, cacna1ha, KCNB2, kcng3, kcnj19b, cacna1da, cacna1i, kcnj14, cacna1fa, thy1, hamp, kcnj10a, cacng8b, selenon, kcnb1, pm20d1.2, kcnj11l, bcl2l10, kcna2b, cacng5b, kcnj12b, si:dkey-262k9.4, zgc:162160, cacnb2a, scn1lab, kcna1a, cacna1c, cacna1eb, kcnj5, clic2, kcnj12a, tpcn3	3383	141	13373	1.2616	1	0.981138
GOTERM_BP	GO:0010557~positive regulation of macromolecule biosynthetic process	90	0.0665069	-1.17713	ncoa3, ticam1, tcf3a, rai1, med19a, cnbpa, ches1, ilf2, cks1b, e2f7, lpin1, eif5a2, nfkb2, pprc1, smad5, tfeb, fgf1a, psmc6, polr2d, rps9, guf1, si:dkey-156n14.5, si:ch73-60h1.1, ccnl1a, maml3, nfixa, rps6ka4, gata1a, mafk, eif5a, ccnl1b, egr1, jund, arnt2, ruvbl1, tp53inp2, coa3a, psmc1a, dnajc2, nfic, npas4a, jun, galn, rel, elocb, tet3, nfixb, rps6ka5, ccnt1, rtraf, hif1aa, tefa, ddx5, camk4, …	3383	305	13373	1.16646	1	0.981138
GOTERM_BP	GO:0097191~extrinsic apoptotic signaling pathway	13	0.0692773	-1.15941	zgc:153993, cflara, g0s2, bcl2l1, scrt2, mcl1a, src, baxa, mcl1b, casp8, baxb, si:dkey-103e21.5, zgc:194469	3383	31	13373	1.65771	1	0.981138
GOTERM_BP	GO:0034765~regulation of ion transmembrane transport	44	0.069565	-1.15761	cacna1ab, clic1, kcnc1b, kcnc3a, cacnb1, scn8ab, cacng8a, cacnb3b, kcnj9, nalcn, scn1laa, cacnb4a, hvcn1, stim2b, cacna1ha, KCNB2, kcng3, kcnj19b, cacna1da, cacna1i, kcnj14, cacna1fa, thy1, hamp, kcnj10a, cacng8b, selenon, kcnb1, kcnj11l, bcl2l10, kcna2b, cacng5b, kcnj12b, si:dkey-262k9.4, zgc:162160, cacnb2a, scn1lab, kcna1a, cacna1c, cacna1eb, kcnj5, clic2, kcnj12a, tpcn3	3383	138	13373	1.26038	1	0.981138
GOTERM_BP	GO:0098660~inorganic ion transmembrane transport	99	0.0696565	-1.15704	slc9a7, cox8a, cacna1ab, cacnb1, kcnk13b, atp6ap1b, atp5pf, slc39a1, cacna1i, ano1, thy1, atp5l, kcnj10a, hamp, vdac2, atp6ap1la, kcnk3b, atp1a1a.1, cyc1, clcn5b, kcnq5a, atp6v0ca, tcirg1b, tmem175, stim2b, slc31a1, trpv1, atp2c1, trpc1, ryr1a, selenon, kcnj11l, bcl2l10, cacnb3a, atp6v1f, kcnk1b, CABZ01088346.1, si:dkey-262k9.4, atp5pb, kcna1a, cacna1c, atp5mc3a, atp6v1e1b, kcnj12a, clic2, mcu, k…	3383	339	13373	1.15442	1	0.981138
GOTERM_BP	GO:0006605~protein targeting	52	0.071361	-1.14654	ank1b, si:ch73-182a11.2, ank3b, tomm7, timm13, gosr2, timm50, ssr2, dnlz, m6pr, ipo4, srp19, sec61g, timm23a, TIMM21, sec61b, pacs1a, timm9, nup35, vps25, axin1, srp9, ssr3, timm10, tram1, si:ch211-126j24.1, tomm20a, akap12b, immp2l, kpna6, kpna2, ank3b, rgs17, snf8, pmm2, nup62l, tomm40l, fam53b, ran, ranbp1, tomm20b, sys1, vti1a, pex5lb, tomm22, ank1a, golga4, mtx3, spcs1, tram2, snupn, heatr3	3383	167	13373	1.23087	1	0.981138
GOTERM_BP	GO:0060036~notochord cell vacuolation	5	0.0732094	-1.13543	atp6v1f, cav1, rab32a, atp6v0ca, atp6v1e1b	3383	7	13373	2.82357	1	0.981138
GOTERM_BP	GO:0061484~hematopoietic stem cell homeostasis	5	0.0732094	-1.13543	dnmt3bb.1, tp53, sae1, polr3k, ube2ib	3383	7	13373	2.82357	1	0.981138
GOTERM_BP	GO:0010604~positive regulation of macromolecule metabolic process	166	0.0733532	-1.13458	psme1, ches1, med19a, cks1b, tnfrsf11a, socs5b, eif5a2, CABZ01041494.1, ccl34b.8, gdf11, dusp22b, fgf1a, psmc6, baxb, polr2d, guf1, diablob, si:dkey-156n14.5, vegfaa, ccnl1a, gata1a, ndrg4, axin1, mafk, ccnl1b, egr1, tp53inp2, map3k12, ankrd6b, wbp2, gadd45ab, pdgfc, npas4a, jun, rplp1, galn, tet3, nfixb, ctsh, rtraf, ccnt1, MAP3K13, psme3, klf1, ddx5, ccnt2a, tet2, ncoa2, mafgb, zgc:153631, map2…	3383	591	13373	1.11032	1	0.981138
GOTERM_BP	GO:0030833~regulation of actin filament polymerization	28	0.0737449	-1.13227	arpc5b, tmod1, actr2b, cdc42ep4b, capgb, arpc4, wipf1b, pfn2, arpc1a, wasa, si:ch211-176g13.8, capza1a, baiap2a, arpc3, ap1ar, arpc1b, wasb, cdc42ep5, pick1, pfn1, tmod2, tmsb4x, arpc5a, actr3b, wash1, cdc42ep4a, arpc4l, arpc2	3383	82	13373	1.3498	1	0.981138
GOTERM_BP	GO:0052547~regulation of peptidase activity	21	0.0749293	-1.12535	si:dkey-203a12.2, si:busm1-57f23.1, cycsb, psme1, bcl2l1, lamtor5, mcl1a, apaf1, baxa, ctsh, psme3, hdr, mcl1b, casp8, psme2, baxb, tp53, pycard, zgc:158852, diablob, pak2a	3383	58	13373	1.43126	1	0.981138
GOTERM_BP	GO:0086010~membrane depolarization during action potential	11	0.0760779	-1.11874	cacna1ha, cacna1ab, scn1lab, scn8ab, cacna1c, cacna1da, cacna1i, cacna1fa, nalcn, scn1laa, tpcn3	3383	25	13373	1.73932	1	0.981138
GOTERM_BP	GO:0046834~lipid phosphorylation	11	0.0760779	-1.11874	pik3cg, pik3ca, efr3bb, impa2, pi4kaa, pik3cd, impa1, pik3cb, pi4kab, pik3c2b, pik3r2	3383	25	13373	1.73932	1	0.981138
GOTERM_BP	GO:0032543~mitochondrial translation	15	0.0767172	-1.11511	mrps16, mrps18a, ptrh1, hars, mrpl23, mrpl16, mrpl47, mrps17, mrps24, mrps7, uqcc2, mrpl57, mrps18c, chchd1, coa3a	3383	38	13373	1.56039	1	0.981138
GOTERM_BP	GO:0048863~stem cell differentiation	20	0.0798852	-1.09753	mib1, ak2, cdca7a, irf7, psmd11b, f2r, ptch1, fosl2, dld, dnmt3bb.1, nos1, fosab, rps29, pdcd2, tal1, metap2b, psmd11a, etv2, cxcl8a, csf3a	3383	55	13373	1.43745	1	0.981138
GOTERM_BP	GO:0032922~circadian regulation of gene expression	6	0.0814798	-1.08895	bhlhe40, per3, clocka, ciarta, nfil3-6, nr1d2a	3383	10	13373	2.3718	1	0.981138
GOTERM_BP	GO:0007229~integrin-mediated signaling pathway	17	0.0818026	-1.08723	adam8a, ilk, itgb6, itgb8, itga11b, itgb4, yrk, itgb7, mibp2, itga2.2, phactr4a, itga5, phactr4b, itgae.2, itgb2, itga9, itga3a	3383	45	13373	1.49336	1	0.981138
GOTERM_BP	GO:0045637~regulation of myeloid cell differentiation	9	0.081913	-1.08665	gata1a, stat5a, irf8, tmem178, spi1a, cish, spi1b, mitfb, rps19	3383	19	13373	1.87247	1	0.981138
GOTERM_BP	GO:0009226~nucleotide-sugar biosynthetic process	9	0.081913	-1.08665	gmppb, pmm2, ugdh, gmppab, TSTA3 (1 of many), uap1l1, uap1, mpi, gnpda1	3383	19	13373	1.87247	1	0.981138
GOTERM_BP	GO:0043269~regulation of ion transport	51	0.0825133	-1.08348	cacna1ab, clic1, sgk1, cacnb1, kcnc3a, scn8ab, saraf, cacnb3b, nalcn, cacna1ha, kcng3, kcnj19b, cacna1da, cacna1i, thy1, hamp, kcnj10a, kcnb1, vdac2, cacng5b, sgk2b, zgc:162160, si:ch211-195b13.1, cacna1eb, kcnc1b, cacng8a, kcnj9, scn1laa, cacnb4a, hvcn1, stim2b, KCNB2, kcnj14, cacna1fa, cacng8b, selenon, pm20d1.2, kcnj11l, bcl2l10, kcna2b, kcnj12b, si:dkey-262k9.4, cacnb2a, kcna1a, scn1lab, cacn…	3383	165	13373	1.22184	1	0.981138
GOTERM_BP	GO:0048858~cell projection morphogenesis	152	0.0837082	-1.07723	lrrc38a, crmp1, boc, foxj1a, zgc:194281, cfl1, sema3fb, sema4ga, extl3, nyap2a, sema3h, plxna3, slbp, lingo1a, cep131, kif26ba, ehd1b, srrm4, neo1a, pik3cd, clns1a, thy1, alcamb, plxna4, epha4b, vegfaa, unc119.2, fzd2, lrfn5a, notch3, mycbp2, b9d1, cplane2, etv5b, btbd3b, col6a4a, pcdh18b, sgk2b, nckap1, nphp3, btbd3a, llph, notch1b, si:ch211-195b13.1, cntn3a.1, SEMA4F, si:dkey-6n6.1, sema5a, cls…	3383	541	13373	1.11064	1	0.981138
GOTERM_BP	GO:0051058~negative regulation of small GTPase mediated signal transduction	8	0.0837596	-1.07697	nf1a, akap12b, CABZ01005876.1, nf1b, rasal3, spry1, syngap1a, dab2ipa	3383	16	13373	1.9765	1	0.981138
GOTERM_BP	GO:0097502~mannosylation	8	0.0837596	-1.07697	dpm1, sdf2, rxylt1, sdf2l1, dpm2, dpy19l3, large1, pomgnt2	3383	16	13373	1.9765	1	0.981138
GOTERM_BP	GO:0006896~Golgi to vacuole transport	7	0.0840601	-1.07541	rab14l, dopey2, gosr2, vti1a, rbsn, ap1ar, sys1	3383	13	13373	2.12854	1	0.981138
GOTERM_BP	GO:0061008~hepaticobiliary system development	39	0.0842405	-1.07448	zeb2b, snx7, gpc1a, e2f7, aldh1a2, nav3, samm50, uhrf1, nup62l, eif3i, nos1, fgfr2, bmp2b, arf6a, mapk10, mpi, gmnn, ppm1k, grna, notch3, tomm22, bms1, dkk2, cebpa, id2a, gfer, tnfb, snapc2, dld, prkcsh, rab23, gpr22a, rarab, arnt2, arf6b, sec13, xbp1, apc, klf6a	3383	122	13373	1.26366	1	0.981138
GOTERM_BP	GO:0048468~cell development	308	0.0842649	-1.07435	olfm2a, adgrg1, mvp, adssl1, boc, myh7ba, slc43a1a, sema3fb, extl3, nyap2a, sema3h, gdf11, plxna3, srrm4, rab8a, pik3cd, alcamb, rps14, csf3a, vegfaa, unc119.2, gap43, obscnb, cntn1b, adgrv1, btbd3b, nckap1, btbd3a, llph, notch1b, rbpjb, lmo2, si:dkey-6n6.1, clstn1, dner, ttn.1, lgals2a, ppp1r9ba, cyfip1, gna12a, sipa1l1, stmn4l, nos1, stmn3, clpxa, tgfb2l, stat5a, pik3ca, si:ch211-113g11.6, slc7…	3383	1135	13373	1.07271	1	0.981138
GOTERM_BP	GO:0034655~nucleobase-containing compound catabolic process	37	0.0855131	-1.06797	ada, rnaseh2a, lsm1, si:ch211-201h21.5, exosc6, skiv2l, rnaset2, ada2b, mrto4, dnase1l4.1, nudt3a, si:dkey-4e7.3, exosc8, nudt3b, dis3l2, polr2d, dnase2b, fen1, cnp, nudt4a, itpa, ncbp2, rbm8a, cnot9, lin28a, dnph1, lsm5, dnase1l1, lsm4, uhmk1, exosc9, magoh, dnase1l4.2, ago3b, smg8, endog, smg5	3383	115	13373	1.27183	1	0.981138
GOTERM_BP	GO:0010771~negative regulation of cell morphogenesis involved in differentiation	16	0.0871531	-1.05972	sema6e, si:ch211-113g11.6, sema4ba, sema3fb, sema4ga, sema3h, tnc, SEMA4F, ap1ar, sema5a, sema3aa, thy1, sema5bb, sema5ba, sema4gb, epha4b	3383	42	13373	1.5059	1	0.981138
GOTERM_BP	GO:0006414~translational elongation	16	0.0871531	-1.05972	eef1g, si:ch211-153b23.4, eef1da, gtpbp2b, rplp1, eef1b2, eef1a1l1, eif5a2, rplp2l, eif5a, srp9, rplp2, rps9, eef1a1l2, eef2b, eef2a.1	3383	42	13373	1.5059	1	0.981138
GOTERM_BP	GO:0032990~cell part morphogenesis	153	0.0901482	-1.04504	lrrc38a, crmp1, boc, foxj1a, zgc:194281, cfl1, sema3fb, sema4ga, extl3, nyap2a, sema3h, plxna3, slbp, lingo1a, cep131, kif26ba, ehd1b, srrm4, neo1a, pik3cd, clns1a, thy1, alcamb, plxna4, epha4b, vegfaa, unc119.2, fzd2, lrfn5a, notch3, mycbp2, b9d1, cplane2, etv5b, btbd3b, col6a4a, pcdh18b, sgk2b, nckap1, nphp3, btbd3a, llph, notch1b, si:ch211-195b13.1, cntn3a.1, SEMA4F, si:dkey-6n6.1, sema5a, cls…	3383	546	13373	1.10771	1	0.981138
GOTERM_BP	GO:0032940~secretion by cell	66	0.0910081	-1.04092	doc2a, ptbp1a, mical3a, stx1b, syt2a, rims3, rhbdf1a, cacna1ha, snap47, stxbp3, syt7a, scrn3, scfd2, syt5b, rab8a, vmp1, rfx3, cadpsb, syt16, cacna1i, ano1, syt3, sec22ba, rims1b, si:dkey-110c1.7, cadpsa, cplane2, stx11a, exoc4, stxbp2, rab8b, rab27b, exoc8, doc2b, vamp5, adgrl1a, doc2d, nrxn3b, fer, exoc3l2b, lin7b, tmem167a, snap23.1, stx4, rab11fip5a, crhb, vip, vamp2, si:dkey-245p14.4, stxbp5…	3383	221	13373	1.18053	1	0.981138
GOTERM_BP	GO:0007179~transforming growth factor beta receptor signaling pathway	15	0.0928853	-1.03205	skila, skor1b, bambia, smad9, tgfb1a, skilb, smad5, dusp22b, tgfb1b, tgfbr2b, tgfb3, smad3b, si:dkey-239n17.4, tgfb2l, si:dkey-222b8.1	3383	39	13373	1.52038	1	0.981138
GOTERM_BP	GO:0060215~primitive hemopoiesis	15	0.0928853	-1.03205	trim2a, numbl, cebpa, gata1a, rps24, bmi1a, snrkb, klf1, tet2, scube1, ncoa2, tal1, nop10, etv2, mta3	3383	39	13373	1.52038	1	0.981138
GOTERM_BP	GO:0030838~positive regulation of actin filament polymerization	20	0.0933349	-1.02996	arpc5b, pick1, actr2b, cdc42ep4b, arpc5a, arpc4, wipf1b, arpc1a, actr3b, wasa, wash1, cdc42ep4a, baiap2a, arpc3, ap1ar, arpc4l, arpc1b, wasb, arpc2, cdc42ep5	3383	56	13373	1.41179	1	0.981138
GOTERM_BP	GO:0001666~response to hypoxia	20	0.0933349	-1.02996	npc1, loxl2b, vegfbb, apln, dap3, hbba1, crtc3, igfbp1a, hbaa1, hmox1a, lipf, hspa5, cox4i1, arnt2, hsp90b1, tp53, hbba1, atp5meb, ddit3, vegfaa	3383	56	13373	1.41179	1	0.981138
GOTERM_BP	GO:0017157~regulation of exocytosis	24	0.0953067	-1.02088	syt3, doc2a, rims1b, ptbp1a, cplane2, stxbp5b, stx1b, doc2d, sept5b, syt2a, rims3, rims1a, stxbp5a, cacna1ha, zap70, syt7a, rab27b, syt5b, fer, syt6b, cacna1i, syt16, doc2b, scamp5a	3383	70	13373	1.35531	1	0.981138
GOTERM_BP	GO:0008630~intrinsic apoptotic signaling pathway in response to DNA damage	11	0.0966535	-1.01478	zgc:153993, mcl1b, baxb, tp53, bcl2l1, bag6l, xrcc5, scrt2, mcl1a, baxa, crip1	3383	26	13373	1.67242	1	0.981138
GOTERM_BP	GO:2000146~negative regulation of cell motility	14	0.0990267	-1.00425	ptenb, srgap1b, rtn4a, cxcr4b, srgap3, inpp5d, tgfb1a, smad5, plxnb3, ap1ar, sinhcaf, thy1, inppl1a, ngfrb	3383	36	13373	1.53728	1	0.981138
GOTERM_BP	GO:0009451~RNA modification	31	0.0992524	-1.00326	ctu2, si:ch211-153b23.4, thg1l, mettl2a, urm1, fdxacb1, lyn, ftsj3, nsun5, trmt61a, alkbh8, zgc:136564, trmt112, nhp2, pus7, nop58, emg1, nat10, gar1, dkc1, qtrt1, osgep, nop2, ctu1, cdkal1, thumpd1, mrm1, nop10, nop56, fbl, mettl16	3383	95	13373	1.28993	1	0.981138

## Sheet: GO-BP_3dpl
Category	Term	Count	PValue	log10(Pvalue)	Genes	List.Total	Pop.Hits	Pop.Total	Fold.Enrichment	Benjamini	FDR
GOTERM_BP	GO:0006260~DNA replication	58	2.8708e-14	-13.542	cdc7, orc4, e2f7, mcm10, mms22l, rrm2, primpol, mgme1, mcm6, rad51, pole, rfc2, e2f8, prim1, fen1, mcm4, chaf1a, gins3, cdc6, pcna, rrm2, pif1, mcm3, orc5, rfc4, pole2, rpa2, eme1, prim2, wrnip1, dtl, dna2, pold1, orc3, mcmbp, rnaseh2a, cenpx, parp2, orc6, gins2, mcm5, rrm1, dscc1, poln, mcm2, recql4, cenps, mcm8, gins4, cdc45, gins1, pold2, rpa3, tonsl, pola2, pola1, lrwd1, lig1	2363	119	13373	2.75833	7.84591e-11	7.6105e-11
GOTERM_BP	GO:1903047~mitotic cell cycle process	89	1.27304e-11	-10.8952	ccne1, lrmp, nsl1, psme1, mis12, kif11, chfr, snx18b, e2f7, fam83d, nusap1, cdc25b, smc2, ncaph, mybl2b, fign, kif18a, snx9b, rgcc, bub1bb, snx33, fanci, bub1ba, si:dkey-25o16.4, espl1, vangl2, lats2, mastl, si:dkey-27i16.2, ccna2, cdca5, cenph, ercc6l, pmaip1, sass6, ccnd1, psme2, ccne2, ttk, eme1, lzts2a, dtl, mcmbp, arhgef10, bub1, cep57l1, cdca8, ncapd2, tmpoa, gins2, ska3, zwilch, bora, dscc…	2363	249	13373	2.02281	1.73961e-08	1.68741e-08
GOTERM_BP	GO:0030097~hemopoiesis	108	1.36735e-09	-8.86412	melk, pak4, rpl27, haus3, etv7, snrkb, spry4, rgs18, rps14, etv2, csf3a, gar1, snx5, notch1b, CABZ01066725.1, csf3r, sh2b3, rpl22l1, fosab, runx1, chrd, npm1a, ifng1, cd79b, casp8l2, cdca7a, batf, rplp1, gpr18, gpr65, ada2b, epor, rps7, rps29, smox, rpl35, rps3, si:dkey-103e21.5, slc25a38a, bcl6ab, tnfrsf1b, slc7a7, irf7, fbxo5, gfi1ab, dlc, zap70, dnmt3bb.1, ephx2, spi1a, casp8, yap1, bcl6b, rpl…	2363	349	13373	1.75131	1.15268e-06	1.11809e-06
GOTERM_BP	GO:0050900~leukocyte migration	38	2.08159e-09	-8.6816	ccl44, CU861476.1, ccl35.2, cxcl18b, mmp9, CABZ01041494.1, cxcl20, ccl34b.8, jagn1b, fpr1, ccl19a.2, ano6, ch25h, gpr183a, wasb, ccl34b.1, spint1a, cxcl8a, cyba, coro1a, pgfb, ccl34b.9, ccl38.1, cxcl32b.1, ptk2ba, rac2, cxcr4b, yrk, inpp5d, pik3cg, cxcl11.6, csf1ra, ccl19a.1, cxcl11.5, cxcr3.2, inppl1a, myd88, stk10	2363	79	13373	2.72221	1.15268e-06	1.11809e-06
GOTERM_BP	GO:0048534~hematopoietic or lymphoid organ development	110	2.10881e-09	-8.67596	melk, pak4, rpl27, haus3, etv7, snrkb, spry4, rgs18, rps14, etv2, csf3a, gar1, snx5, notch1b, CABZ01066725.1, csf3r, sh2b3, rpl22l1, fosab, runx1, chrd, npm1a, ifng1, cd79b, casp8l2, cdca7a, batf, rplp1, gpr18, gpr65, ada2b, epor, rps7, rps29, smox, rpl35, mcm2, rps3, si:dkey-103e21.5, slc25a38a, bcl6ab, tnfrsf1b, slc7a7, irf7, fbxo5, gfi1ab, dlc, zap70, dnmt3bb.1, ephx2, spi1a, casp8, yap1, bcl6…	2363	360	13373	1.72924	1.15268e-06	1.11809e-06
GOTERM_BP	GO:0002520~immune system development	110	5.84666e-09	-8.23309	melk, pak4, rpl27, haus3, etv7, snrkb, spry4, rgs18, rps14, etv2, csf3a, gar1, snx5, notch1b, CABZ01066725.1, csf3r, sh2b3, rpl22l1, fosab, runx1, chrd, npm1a, ifng1, cd79b, casp8l2, cdca7a, batf, rplp1, gpr18, gpr65, ada2b, epor, rps7, rps29, smox, rpl35, mcm2, rps3, si:dkey-103e21.5, slc25a38a, bcl6ab, tnfrsf1b, slc7a7, irf7, fbxo5, gfi1ab, dlc, zap70, dnmt3bb.1, ephx2, spi1a, casp8, yap1, bcl6…	2363	366	13373	1.70089	2.66315e-06	2.58325e-06
GOTERM_BP	GO:0000280~nuclear division	75	8.21794e-09	-8.08524	pttg1, nsl1, trip13, mis12, kif11, chfr, snx18b, fam83d, mnd1, nusap1, bcl2l11, smc2, ncaph, mybl2b, rad51, fign, kif18a, snx9b, bub1bb, snx33, bub1ba, si:dkey-25o16.4, espl1, lats2, mastl, cdca5, ercc6l, pmaip1, kif20bb, sass6, ttk, eme1, msh6, lzts2a, mcmbp, cenpx, arhgef10, bub1, cep57l1, cdca8, ncapd2, ska3, zwilch, bora, dscc1, ska1, wee1, spc24, cenpe, ncapg, chtf8, si:ch211-199g17.9, rad51…	2363	221	13373	1.92059	3.20852e-06	3.11225e-06
GOTERM_BP	GO:0035556~intracellular signal transduction	292	1.52127e-08	-7.81779	ppp1r9alb, melk, cdc42ep3, prkcdb, rhobtb1, ajuba, pkn3, inhbab, CABZ01041494.1, BX323819.1, ccl34b.8, sh3bp5la, rassf3, snrkb, plcd4b, baxb, si:dkey-163m14.2, stk38b, dcdc2b, gucy2d, rock2bl, gpr4, obscnb, tnfrsfa, tradd, sav1, si:dkey-34d22.5, pkn1a, plek2, racgap1, gna12a, gpr18, irak1, ftr14, tnfrsf19, blnk, si:dkey-34d22.2, diras1b, ccl19a.2, rtn4rl2b, RASGRP2, tp53bp2a, dclk1a, stac, rasd1,…	2363	1231	13373	1.34242	5.19705e-06	5.04112e-06
GOTERM_BP	GO:0006270~DNA replication initiation	17	2.1747e-08	-7.6626	cdc7, orc3, orc4, cdc6, gins4, cdc45, mcm3, orc6, gins2, mcm10, pola1, orc5, pola2, mcm5, mcm6, mcm2, mcm4	2363	22	13373	4.37312	6.60385e-06	6.40571e-06
GOTERM_BP	GO:0016477~cell migration	142	2.42021e-08	-7.61615	zeb2b, gna13a, ccl35.2, rgs14a, sema3fb, CABZ01041494.1, dvl2, ccl34b.8, lrp5, fpr1, ano6, mmp14b, sema3fa, thy1, alcamb, sdc4, rac1a, spint1a, fzd2, loxl2b, rtn4rl2a, pgfb, ccl38.1, disc1, hgfb, smo, sema3e, ccl19a.1, cxcl11.5, itga5, chrd, sinhcaf, inppl1a, cxcl11.1, ccl36.1, lzts2a, gna12a, sema6d, cxcr3.1, cxcl18b, tnfrsf19, stat3, cxcl20, ccl19a.2, cemip2, acvrl1, sema3gb, wasb, lama1, apoc1…	2363	518	13373	1.5514	6.61443e-06	6.41597e-06
GOTERM_BP	GO:0060326~cell chemotaxis	41	8.31036e-08	-7.08038	ccl36.1, ccl44, CU861476.1, ccl39.1, ccl35.2, cxcl18b, CABZ01041494.1, cxcl20, ccl34b.8, fpr1, ccl19a.2, ano6, BX323596.2, ccl35.1, ch25h, gpr183a, wasb, ccl34b.1, spint1a, cxcl8a, cyba, coro1a, pgfb, ccl34b.9, ccl38.1, cxcl32b.1, cxcr4b, yrk, inpp5d, pik3cg, cxcl11.6, BX323596.1, csf1ra, ccl19a.1, cxcl11.5, rab13, ccl39.2, cxcr3.2, inppl1a, myd88, cxcl11.1	2363	99	13373	2.34376	2.06475e-05	2.0028e-05
GOTERM_BP	GO:0007067~mitotic nuclear division	57	9.78517e-08	-7.00943	nsl1, mis12, kif11, chfr, snx18b, fam83d, nusap1, smc2, ncaph, mybl2b, fign, kif18a, snx9b, bub1bb, snx33, bub1ba, si:dkey-25o16.4, espl1, lats2, mastl, cdca5, ercc6l, pmaip1, lzts2a, mcmbp, arhgef10, bub1, cep57l1, cdca8, ncapd2, ska3, zwilch, bora, dscc1, ska1, wee1, spc24, cenpe, ncapg, chtf8, mad2l1, gnl3, ndc80, cenpn, fbxo5, birc7, nek8, anapc10, katna1, aurka, snx18a, ncapd3, aurkb, dsn1, …	2363	160	13373	2.01614	2.22857e-05	2.16171e-05
GOTERM_BP	GO:0030595~leukocyte chemotaxis	30	1.17725e-07	-6.92913	ccl44, ccl35.2, cxcl18b, cxcl20, ccl34b.8, ccl19a.2, ano6, ch25h, gpr183a, wasb, ccl34b.1, spint1a, cxcl8a, cyba, coro1a, pgfb, ccl34b.9, ccl38.1, cxcl32b.1, cxcr4b, yrk, inpp5d, pik3cg, cxcl11.6, csf1ra, ccl19a.1, cxcl11.5, cxcr3.2, inppl1a, myd88	2363	62	13373	2.73839	2.47493e-05	2.40068e-05
GOTERM_BP	GO:0006412~translation	140	1.84558e-07	-6.73387	si:ch211-153b23.4, rps18, ucp2, eif1axa, ajuba, eef1da, eef1b2, eif5a2, mov10b.2, rpl27, rplp2l, rpl28, rplp2, rpl21, rps14, rpl29, eif3ha, rpl24, slc25a48, rps21, eif2s1a, rpl18, ucp1, dre-mir-212, zfp36l2, mars, rps13, rps2, rpl22l1, rpl7, slc25a43, dre-mir-181b-1, rpl23, rpl34, ptrh1, rps8a, rps11, rplp1, zfp36l1a, znf385a, slc25a55a, slc25a25a, rpl5b, slc25a23a, rps7, rpl30, rps29, rpl35, rpl…	2363	525	13373	1.50916	3.60284e-05	3.49474e-05
GOTERM_BP	GO:0006518~peptide metabolic process	159	3.00047e-07	-6.52281	cndp2, si:ch211-153b23.4, rps18, ucp2, eif1axa, ajuba, eef1da, eef1b2, ANPEP (1 of many), eif5a2, mov10b.2, rpl27, rplp2l, rpl28, gstt1b, rplp2, rpl21, rps14, rpl29, eif3ha, rpl24, slc25a48, rps21, eif2s1a, rpl18, ucp1, dre-mir-212, zfp36l2, mars, rps13, rps2, rpl22l1, rpl7, slc25a43, dre-mir-181b-1, rpl23, rpl34, ptrh1, rps8a, rps11, rplp1, zfp36l1a, znf385a, slc25a55a, lta4h, slc25a25a, erap1b,…	2363	618	13373	1.45604	5.46685e-05	5.30283e-05
GOTERM_BP	GO:0009617~response to bacterium	62	3.76009e-07	-6.4248	junba, hist1h2a11, tnfrsf11a, rhogb, mmp9, mpeg1.1, cfbl, tnfrsf9a, tfa, hadhaa, nod2, angptl4, hist1h2a11, nod1, hist1h2a4, dram1, tnfrsfa, pcna, fas, tlr3, cxcr4b, cebpb, hist1h2a11, cxcl11.5, si:ch211-112c15.8, ctsd, jund, hist1h2a4, si:ch211-113a14.11, hist1h2a4, cxcr3.2, tnfrsf1a, myd88, ngfrb, ifng1, gpr84, traf6, jun, june, cxcl18b, cxcl20, nradd, irak4, hist1h2a11, leap2, zgc:153631, mpeg…	2363	186	13373	1.88644	6.42271e-05	6.23001e-05
GOTERM_BP	GO:0043043~peptide biosynthetic process	140	4.25954e-07	-6.37064	si:ch211-153b23.4, rps18, ucp2, eif1axa, ajuba, eef1da, eef1b2, eif5a2, mov10b.2, rpl27, rplp2l, rpl28, rplp2, rpl21, rps14, rpl29, eif3ha, rpl24, slc25a48, rps21, eif2s1a, rpl18, ucp1, dre-mir-212, zfp36l2, mars, rps13, rps2, rpl22l1, rpl7, slc25a43, dre-mir-181b-1, rpl23, rpl34, ptrh1, rps8a, rps11, rplp1, zfp36l1a, znf385a, slc25a55a, slc25a25a, rpl5b, slc25a23a, rps7, rpl30, rps29, rpl35, rpl…	2363	532	13373	1.4893	6.84784e-05	6.64238e-05
GOTERM_BP	GO:0006259~DNA metabolic process	114	7.73519e-07	-6.11153	faap24, h2afx, trip13, mnd1, mms22l, rrm2, rad1, haus3, mcm6, fign, dnase1l4.1, rad51, zgc:110224, pole, rfc2, e2f8, prim1, ube2t, mcm4, dnase2, top2a, cry-dash, pcna, pif1, cebpb, pole2, rfc4, esco2, eme1, dnmt3ba, wrnip1, dtl, pold1, fancd2, cenpx, batf, fancc, orc6, dclre1a, rrm1, uhrf1, eepd1, mcm2, rps3, neil1, si:dkey-119f1.1, rad51d, recql4, exo1, gins4, brca2, gins1, pold2, rpa3, pola2, p…	2363	417	13373	1.54716	0.000112573	0.000109196
GOTERM_BP	GO:0048513~animal organ development	437	8.14973e-07	-6.08886	mvp, cenpf, sema3fb, dio2, mmp14b, foxn4, e2f8, fzd6, alcamb, rps14, eif3ha, cd74b, csf3a, armc4, obscnb, bms1, notch1b, smo, rpl22l1, sfrp1a, ctsd, pim1, ttn.1, dhrs9, notch2, crip2, gna12a, cdca8, sema6d, uhrf1, cemip2, gfpt1, caspa, smox, jupa, sema3gb, dre-mir-21-2, atp1b2b, mcm2, tbx6, adgrg6, irf7, slc7a7, cdipt, poc1b, gfi1ab, brca2, foxc1a, otx1, arf1, eif3ba, dub, casp8, fezf2, plcb3, bc…	2363	2027	13373	1.22009	0.000112573	0.000109196
GOTERM_BP	GO:0002521~leukocyte differentiation	36	8.23808e-07	-6.08417	cd79b, irf8, casp8l2, pak4, batf, si:ch211-243a20.4, il7r, spi1b, gpr18, jagn1b, jak3, ada2b, gpr183a, si:dkey-103e21.5, etv2, csf3a, tec, ak2, slc7a7, irf7, jak1, csf3r, CABZ01066725.1, zap70, tmem178, csf1ra, si:ch211-214p13.9, spi1a, runx1, casp8, tfe3a, nlrc3l, wdr66, rpl22, ikzf1, zgc:194469	2363	88	13373	2.31518	0.000112573	0.000109196
GOTERM_BP	GO:0007166~cell surface receptor signaling pathway	273	1.07792e-06	-5.96741	fzd7b, adgrg1, itgb1a, boc, inhbab, sema3fb, CABZ01041494.1, sox4a, ccl34b.8, fgf6a, fpr1, fzd10, baxb, fes, fzd6, csf1rb, irf5, rgs3a, ephb4b, pgfb, wif1, si:dkey-32n7.4, smo, notch1b, trabd2a, tspan18b, sfrp1a, cxcl11.5, calcrlb, lzts2a, cd63, pygo1, notch2, sema6d, irak1, grm1b, cd81b, jag1b, ccl19a.2, rtn4rl2b, acvrl1, jupa, sema3gb, zgc:64051, si:dkey-239n17.4, si:dkey-103e21.5, adgrg6, dlb,…	2363	1190	13373	1.29832	0.000140284	0.000136075
GOTERM_BP	GO:0043604~amide biosynthetic process	148	2.0371e-06	-5.69099	si:ch211-153b23.4, rps18, ucp2, eif1axa, ajuba, eef1da, eef1b2, eif5a2, mov10b.2, rpl27, rplp2l, rpl28, rplp2, rpl21, rps14, rpl29, eif3ha, rpl24, slc25a48, rps21, eif2s1a, rpl18, ucp1, dre-mir-212, zfp36l2, mars, rps13, rps2, st3gal4, rpl22l1, rpl7, slc25a43, dre-mir-181b-1, rpl23, rpl34, ptrh1, rps8a, rps11, rplp1, zfp36l1a, znf385a, slc25a55a, slc25a25a, cers4b, rpl5b, slc25a23a, aanat1, rps7,…	2363	584	13373	1.43421	0.000253064	0.000245471
GOTERM_BP	GO:0098813~nuclear chromosome segregation	38	3.17733e-06	-5.49794	smc5, pttg1, nsl1, trip13, mcmbp, mis12, cenpx, bub1, cep57l1, cdca8, ncapd2, fam83d, smc2, ncaph, dscc1, kif18a, cenpe, ncapg, chtf8, bub1bb, si:ch211-199g17.9, mad2l1, ndc80, bub1ba, si:dkey-25o16.4, espl1, cenps, si:dkey-57a22.11, cdca5, sgo1, anapc10, esco2, ncapd3, aurkb, dsn1, ttk, eme1, kif23	2363	100	13373	2.15055	0.00037755	0.000366222
GOTERM_BP	GO:0009615~response to virus	24	3.40508e-06	-5.46787	mxf, ifng1, ifit14, trim25, gig2i, irf5, ifit16, traf6, mxa, tlr3, tmem173, pkz, ifit10, rsad2, mxc, mxb, atf3, ifit8, ifit9, serinc5, ifit11, ifit12, nfkbiaa, mxe	2363	50	13373	2.71648	0.000387754	0.00037612
GOTERM_BP	GO:0097190~apoptotic signaling pathway	42	3.69706e-06	-5.43214	casp8l2, g0s2, nme8, bnip4, znf385a, tnfrsf11a, xrcc5, ctsh, nradd, tp53bp2a, tnfrsf9a, rps29, baxb, tp53, zgc:153631, si:dkey-103e21.5, rps19, uacaa, tnfrsf1b, cflara, relt, tnfrsfa, fas, ngfra, uacab, si:dkey-23c22.5, apaf1, cerkl, baxa, zgc:153759, bcl2a, si:ch211-112c15.8, pmaip1, tnfsf10l, casp8, chek1, p4hb, ddit3, tnfrsf1a, ngfrb, cd40, zgc:194469	2363	116	13373	2.04907	0.000404162	0.000392036
GOTERM_BP	GO:1903706~regulation of hemopoiesis	20	5.23549e-06	-5.28104	irf8, tnfrsf1b, cdca7a, irf7, si:ch211-243a20.4, f11r.1, spi1b, gpr65, f2r, csf3r, zap70, tmem178, dnmt3bb.1, tfpi2, nfkbiaa, spi1a, runx1, tfe3a, myd88, rps19	2363	38	13373	2.9786	0.000550331	0.000533819
GOTERM_BP	GO:0010564~regulation of cell cycle process	41	5.93518e-06	-5.22657	dtl, wdr76, tpx2, psme1, knstrn, bub1, e2f7, cdc25b, bora, e2f8, rb1, tp53, rgcc, bub1bb, rock2b, fanci, mad2l1, gnl3, ndc80, bub1ba, si:dkey-25o16.4, espl1, rock2bl, fbxo5, si:dkey-27i16.2, cdc45, ccna2, stil, plk4, cdca5, pla2g4aa, anapc10, aurka, insm1a, aurkb, pmaip1, kif20bb, ccnd1, psme2, chek1, kif20ba	2363	114	13373	2.03537	0.000600772	0.000582747
GOTERM_BP	GO:0032496~response to lipopolysaccharide	25	6.56566e-06	-5.18272	junba, gpr84, jun, tnfrsf11a, june, cxcl18b, cxcl20, nradd, tnfrsf9a, zgc:153631, tnfrsf1b, relt, tnfrsfa, fas, ngfra, si:dkey-23c22.5, cxcr4b, zgc:153759, cxcl11.6, si:ch211-112c15.8, cxcl11.5, jund, tnfrsf1a, ngfrb, cd40	2363	55	13373	2.57242	0.000640856	0.000621628
GOTERM_BP	GO:0042255~ribosome assembly	20	1.3559e-05	-4.86777	rps27.1, rpl24, rpl3, rps17, zgc:114188, eif6, rps5, rpl5a, rpsa, rpl23a, rpl6, rps15, rpl11, rpl12, rps28, bxdc2, rpl10, rps10, rps14, rps19	2363	40	13373	2.82967	0.00127782	0.00123948
GOTERM_BP	GO:0043408~regulation of MAPK cascade	52	1.47247e-05	-4.83195	ccl44, ccl35.2, inhbab, tnfrsf11a, fam83d, gdf6b, CABZ01041494.1, ccl34b.8, dusp22b, cart3, spry4, tnfrsf9a, tgfb3, spry1, gpr183a, trib2, cnn2, ccl34b.1, gadd45aa, ccl38.1, tnfrsfa, fas, pik3r6b, ccl19a.1, pik3r5, tnfrsf1a, ngfrb, irak3, cart2, tnfrsf19, nradd, ccl19a.2, il11a, tgfb2, zgc:153631, zak, tnfrsf1b, relt, il17rd, ccl34b.9, cxcl32b.1, bmp10, si:dkey-17m8.1, si:dkey-23c22.5, zgc:153759…	2363	163	13373	1.80543	0.00134142	0.00130117
GOTERM_BP	GO:0097529~myeloid leukocyte migration	26	1.61691e-05	-4.79131	ccl44, ccl35.2, cxcl18b, cxcl20, ccl34b.8, jagn1b, ccl19a.2, wasb, ccl34b.1, spint1a, cxcl8a, cyba, pgfb, ccl34b.9, ccl38.1, cxcl32b.1, rac2, cxcr4b, yrk, inpp5d, pik3cg, csf1ra, ccl19a.1, cxcr3.2, inppl1a, myd88	2363	61	13373	2.41217	0.00142549	0.00138272
GOTERM_BP	GO:0000819~sister chromatid segregation	28	2.05922e-05	-4.6863	smc5, nsl1, mcmbp, mis12, bub1, cep57l1, cdca8, ncapd2, smc2, ncaph, dscc1, kif18a, cenpe, ncapg, chtf8, bub1bb, mad2l1, ndc80, bub1ba, si:dkey-25o16.4, espl1, cdca5, anapc10, esco2, ncapd3, aurkb, dsn1, kif23	2363	69	13373	2.29654	0.0017587	0.00170594
GOTERM_BP	GO:0000165~MAPK cascade	45	2.22579e-05	-4.65252	ccl44, ccl35.2, tnfrsf11a, cart2, fam83d, irak3, CABZ01041494.1, tnfrsf19, csrp1a, ccl34b.8, nradd, dusp22b, ccl19a.2, cart3, spry4, tnfrsf9a, il11a, sh2d3cb, spry1, gpr183a, trib2, zgc:153631, ccl34b.1, zak, tnfrsf1b, gadd45aa, relt, il17rd, ccl34b.9, ccl38.1, cxcl32b.1, tnfrsfa, fas, si:dkey-17m8.1, si:dkey-23c22.5, pik3r6b, zgc:153759, gadd45bb, ccl19a.1, trib3, pik3r5, tnfrsf1a, ngfrb, cd40, …	2363	136	13373	1.87257	0.00178914	0.00173546
GOTERM_BP	GO:0023014~signal transduction by protein phosphorylation	45	2.22579e-05	-4.65252	ccl44, ccl35.2, tnfrsf11a, cart2, fam83d, irak3, CABZ01041494.1, tnfrsf19, csrp1a, ccl34b.8, nradd, dusp22b, ccl19a.2, cart3, spry4, tnfrsf9a, il11a, sh2d3cb, spry1, gpr183a, trib2, zgc:153631, ccl34b.1, zak, tnfrsf1b, gadd45aa, relt, il17rd, ccl34b.9, ccl38.1, cxcl32b.1, tnfrsfa, fas, si:dkey-17m8.1, si:dkey-23c22.5, pik3r6b, zgc:153759, gadd45bb, ccl19a.1, trib3, pik3r5, tnfrsf1a, ngfrb, cd40, …	2363	136	13373	1.87257	0.00178914	0.00173546
GOTERM_BP	GO:1990266~neutrophil migration	22	2.34229e-05	-4.63036	cyba, ccl44, ccl35.2, ccl34b.9, cxcl32b.1, ccl38.1, rac2, cxcr4b, cxcl18b, inpp5d, cxcl20, ccl34b.8, jagn1b, pik3cg, ccl19a.2, ccl19a.1, wasb, inppl1a, myd88, ccl34b.1, cxcl8a, spint1a	2363	48	13373	2.59386	0.00182899	0.00177412
GOTERM_BP	GO:0009966~regulation of signal transduction	206	2.701e-05	-4.56847	ajuba, boc, inhbab, CABZ01041494.1, sox4a, BX323819.1, ccl34b.8, si:dkey-163m14.2, rgs3a, gpr4, obscnb, tnfrsfa, wif1, smo, tradd, trabd2a, sfrp1a, cnksr3, lzts2a, gpr18, tnfrsf19, ccl19a.2, rtn4rl2b, tp53bp2a, jupa, rack1, rtn4r, foxc1a, dkk2, ugdh, tgfb1a, tgfb1b, tnfaip8l1, trib3, RASGRF1, fezf2, bmp7b, arhgef40, lypd6, bambib, g0s2, ticam1, ptbp1a, prdm5, si:dkey-172h23.2, fam83d, mcf2a, gdf6…	2363	898	13373	1.29824	0.00205051	0.00198899
GOTERM_BP	GO:0043068~positive regulation of programmed cell death	27	3.45631e-05	-4.46139	melk, fadd, g0s2, bnip4, bcl2l11, ctsh, bmf1, caspa, baxb, tp53, casp3a, badb, caspb, pawr, bida, lats2, tnfrsfa, fas, apaf1, tradd, baxa, esco2, pmaip1, tnfsf10l, casp8, pycard, dusp6	2363	67	13373	2.28063	0.00242208	0.0023494
GOTERM_BP	GO:0010942~positive regulation of cell death	27	3.45631e-05	-4.46139	melk, fadd, g0s2, bnip4, bcl2l11, ctsh, bmf1, caspa, baxb, tp53, casp3a, badb, caspb, pawr, bida, lats2, tnfrsfa, fas, apaf1, tradd, baxa, esco2, pmaip1, tnfsf10l, casp8, pycard, dusp6	2363	67	13373	2.28063	0.00242208	0.0023494
GOTERM_BP	GO:0043065~positive regulation of apoptotic process	27	3.45631e-05	-4.46139	melk, fadd, g0s2, bnip4, bcl2l11, ctsh, bmf1, caspa, baxb, tp53, casp3a, badb, caspb, pawr, bida, lats2, tnfrsfa, fas, apaf1, tradd, baxa, esco2, pmaip1, tnfsf10l, casp8, pycard, dusp6	2363	67	13373	2.28063	0.00242208	0.0023494
GOTERM_BP	GO:0043410~positive regulation of MAPK cascade	35	3.77779e-05	-4.42276	ccl44, ccl35.2, tnfrsf11a, cart2, CABZ01041494.1, tnfrsf19, ccl34b.8, nradd, dusp22b, ccl19a.2, cart3, tnfrsf9a, il11a, gpr183a, zgc:153631, ccl34b.1, zak, tnfrsf1b, gadd45aa, relt, ccl34b.9, ccl38.1, cxcl32b.1, tnfrsfa, fas, si:dkey-17m8.1, si:dkey-23c22.5, pik3r6b, zgc:153759, gadd45bb, ccl19a.1, pik3r5, tnfrsf1a, ngfrb, cd40	2363	98	13373	2.02119	0.00258117	0.00250373
GOTERM_BP	GO:0001944~vasculature development	111	4.34248e-05	-4.36226	utp15, plxdc1, pdgfra, tie1, vcam1b, ano6, e2f8, angpt1, fzd6, thy1, pak2a, eif3ha, etv2, loxl2b, arap3, pgfb, snx5, stab1, rnf213a, notch1b, smo, sema3e, mmp2, itga5, runx1, myh9a, srpx2, lgals2a, notch2, abca1a, ilk, mafba, tnfrsf19, osr1, ada2b, pdgfrb, mfap2, pkd2, rps29, hlx1, acvrl1, lpar2b, tbx6, lama1, phkg1a, tnfrsf1b, adgrg6, lama4, rack1, ptk2ba, ism1, foxc1a, dlc, ptprja, hpse, zap70,…	2363	438	13373	1.43421	0.00289463	0.00280778
GOTERM_BP	GO:0090068~positive regulation of cell cycle process	12	4.78208e-05	-4.32038	rock2b, ndc80, espl1, rock2bl, e2f8, aurkb, pmaip1, ccnd1, e2f7, cdc45, plk4, cdca5	2363	18	13373	3.77289	0.00311177	0.0030184
GOTERM_BP	GO:0030593~neutrophil chemotaxis	19	5.64779e-05	-4.24812	ccl44, ccl35.2, ccl34b.9, cxcl32b.1, ccl38.1, cxcr4b, cxcl18b, inpp5d, cxcl20, ccl34b.8, pik3cg, ccl19a.2, ccl19a.1, wasb, inppl1a, myd88, ccl34b.1, cxcl8a, spint1a	2363	40	13373	2.68818	0.00358963	0.00348193
GOTERM_BP	GO:0042246~tissue regeneration	35	6.04082e-05	-4.2189	notch2, aldh1a2, acanb, mmp9, hbegfa, lgmn, stat3, jag1b, hspd1, serpinh1b, ascl1a, lamb1a, fam53b, erbb2, hspa8, lfng, sdcbp2, NINJ1, fzd2, prph, gap43, hmmr, cxcr4b, ctsba, anxa1a, notch1b, insm1a, esco2, pdgfba, hapln1a, tgif1, mdka, col1a1a, yap1, ttk	2363	100	13373	1.98077	0.00375217	0.00363959
GOTERM_BP	GO:0071621~granulocyte chemotaxis	20	7.08533e-05	-4.14964	ccl44, ccl35.2, ccl34b.9, cxcl32b.1, ccl38.1, cxcr4b, cxcl18b, inpp5d, cxcl20, ccl34b.8, pik3cg, ccl19a.2, csf1ra, ccl19a.1, wasb, inppl1a, myd88, ccl34b.1, cxcl8a, spint1a	2363	44	13373	2.57242	0.00430316	0.00417405
GOTERM_BP	GO:0051607~defense response to virus	19	8.41615e-05	-4.07489	mxf, ifit14, trim25, gig2i, irf5, ifit16, mxa, tlr3, tmem173, ifit10, rsad2, mxc, mxb, ifit8, ifit9, serinc5, ifit11, ifit12, mxe	2363	41	13373	2.62262	0.00500029	0.00485026
GOTERM_BP	GO:0000070~mitotic sister chromatid segregation	25	9.66563e-05	-4.01477	nsl1, mis12, bub1, cep57l1, cdca8, ncapd2, smc2, ncaph, dscc1, kif18a, cenpe, ncapg, chtf8, bub1bb, mad2l1, ndc80, bub1ba, si:dkey-25o16.4, espl1, cdca5, anapc10, ncapd3, aurkb, dsn1, kif23	2363	63	13373	2.24577	0.00562046	0.00545183
GOTERM_BP	GO:0007229~integrin-mediated signaling pathway	20	0.000102475	-3.98938	itgb1b, adam8a, ilk, itgb6, itgb1a, adam9, si:dkey-32n7.4, itgb4, yrk, itgav, itgb7, mibp2, itga2.2, phactr4a, itga5, itga3b, itgae.2, itgb2, itgb3b, itgb5	2363	45	13373	2.51526	0.00583469	0.00565963
GOTERM_BP	GO:0002685~regulation of leukocyte migration	14	0.000164921	-3.78272	pgfb, ptk2ba, rac2, cxcr3.1, cxcr4b, cxcl18b, inpp5d, cxcl20, cxcl11.6, csf1ra, cxcl11.5, wasb, inppl1a, stk10	2363	26	13373	3.04733	0.00919853	0.00892255
GOTERM_BP	GO:0001667~ameboidal-type cell migration	60	0.000195612	-3.7086	fgfrl1a, zeb2b, gna13a, aldh1l1, amot, plod3, sema3fb, dre-mir-221, nusap1, csrp1a, lrp5, colec11, smad5, mmp14b, sema3fa, erbb2, s1pr2, eaf2, cnn2, rac1a, loxl2b, mmp14a, hspg2, vangl2, disc1, cxcr4b, itgav, b4galt1, mpp5a, sema3e, itga5, chrd, robo4, lzts2a, bace2, hmcn2, slc24a5, gna12a, foxc1b, sema6d, stat3, acvr2aa, acvrl1, sema3gb, itgb1b, apoc1, loxl2a, gpc4, foxc1a, lpp, zap70, csf1ra, p…	2363	214	13373	1.58673	0.0106921	0.0103713
GOTERM_BP	GO:0019221~cytokine-mediated signaling pathway	36	0.000213285	-3.67104	ccl44, socs3b, lrtm1, stat4, ccl35.2, irak1, irak3, cxcl18b, socs3a, cxcl20, ccl34b.8, jagn1b, rtn4rl2b, ccl19a.2, crfb4, LRRC4C (1 of many), socs1b, ccl34b.1, csf1rb, flrt1b, cntf, irf5, rtn4rl2a, ccl34b.9, ccl38.1, cxcl32b.1, rtn4r, kitb, f3a, socs1a, cxcl11.6, csf1ra, ccl19a.1, cxcl11.5, dcn, cxcr3.2	2363	110	13373	1.85214	0.011241	0.0109037
GOTERM_BP	GO:0045787~positive regulation of cell cycle	18	0.000213879	-3.66983	rock2b, ndc80, espl1, cks2, rock2bl, si:dkey-27i16.2, cks1b, e2f7, cdc45, plk4, cdca5, cdc25b, e2f8, aurkb, pmaip1, ccnd1, tp53, rgcc	2363	40	13373	2.5467	0.011241	0.0109037
GOTERM_BP	GO:1901532~regulation of hematopoietic progenitor cell differentiation	9	0.000235556	-3.62791	f2r, csf3r, tnfrsf1b, dnmt3bb.1, cdca7a, nfkbiaa, irf7, f11r.1, myd88	2363	12	13373	4.2445	0.0119022	0.0115451
GOTERM_BP	GO:0001568~blood vessel development	94	0.000239064	-3.62149	utp15, plxdc1, cdkn1a, amot, kif11, e2f7, dre-mir-221, tie1, dla, smad5, ano6, e2f8, lpar6a, angpt1, fzd6, thy1, pak2a, fli1b, efna1a, etv2, cxcl8a, gas6, loxl2b, alox5ap, hspg2, fli1a, fermt2, pgfb, arhgef9b, snx5, itgav, rnf213a, notch1b, smo, sema3e, fmnl3, itga5, runx1, robo4, dab2, myh9a, srpx2, lgals2a, abca1a, ilk, foxc1b, tnfrsf19, osr1, ada2b, pdgfrb, nrxn3b, eif3i, mfap2, rps29, hlx1, k…	2363	374	13373	1.4224	0.0119022	0.0115451
GOTERM_BP	GO:0071103~DNA conformation change	42	0.000240107	-3.61959	FP340257.1, si:ch1073-159d7.7, CR354435.1, CU457819.5, ncapd2, si:dkey-148h10.5, gins2, zgc:173585, smc2, CU459186.3, ncaph, mis18a, FP325123.2, zgc:110425, si:ch73-368j24.12, si:dkey-23a13.17, zgc:163061, ncapg, chaf1a, zgc:173552, si:dkey-108k21.21, ncaph2, si:ch1073-153i20.4, zgc:153405, si:ch73-368j24.11, top2a, recql4, CU459186.2, CU459186.6, si:ch211-113a14.12, anp32b, gins4, pif1, chaf1b, …	2363	136	13373	1.74773	0.0119022	0.0115451
GOTERM_BP	GO:1902531~regulation of intracellular signal transduction	121	0.00024388	-3.61282	ccl35.2, ajuba, nme8, inhbab, tnfrsf11a, CABZ01041494.1, BX323819.1, ccl34b.8, arhgef3l, dusp22b, spry4, trib2, LRRC4C (1 of many), si:dkey-163m14.2, arhgef2, gpr4, rtn4rl2a, arhgef33, obscnb, ccl38.1, tnfrsfa, tradd, arhgef39, ccl19a.1, plekhg4, rasa1b, gpr18, cart2, tnfrsf19, socs3a, gpr65, irak4, ccl19a.2, rtn4rl2b, tp53bp2a, net1, zgc:153631, selenon, dia1b, tnfrsf1b, arhgef16, ccl34b.9, cxcl…	2363	505	13373	1.356	0.0119022	0.0115451
GOTERM_BP	GO:0051247~positive regulation of protein metabolic process	75	0.000256541	-3.59084	ccl44, ticam1, tpx2, psme1, ccl35.2, cks1b, inhbab, tnfrsf11a, gdf6b, rnf19b, eif5a2, CABZ01041494.1, ccl34b.8, dusp22b, cart3, tnfrsf9a, tgfb3, baxb, rps9, gpr183a, rgcc, trib2, si:ch211-212k18.15, ccl34b.1, cntf, gadd45aa, ccl38.1, tnfrsfa, fas, si:dkey-27i16.2, pik3r6b, esco2, ccl19a.1, pmaip1, psme2, pik3r5, pycard, cdc20, tnfrsf1a, ngfrb, rplp1, cart2, tnfrsf19, ctsh, nradd, ccl19a.2, bmf1, …	2363	285	13373	1.4893	0.0121724	0.0118072
GOTERM_BP	GO:1901990~regulation of mitotic cell cycle phase transition	23	0.000267232	-3.57311	mad2l1, gnl3, dtl, fanci, ndc80, bub1ba, psme1, bub1, si:dkey-27i16.2, e2f7, cdc45, ccna2, cdca5, pla2g4aa, anapc10, cdc25b, rb1, ccnd1, psme2, chek1, tp53, rgcc, bub1bb	2363	59	13373	2.20618	0.0121724	0.0118072
GOTERM_BP	GO:1901987~regulation of cell cycle phase transition	23	0.000267232	-3.57311	mad2l1, gnl3, dtl, fanci, ndc80, bub1ba, psme1, bub1, si:dkey-27i16.2, e2f7, cdc45, ccna2, cdca5, pla2g4aa, anapc10, cdc25b, rb1, ccnd1, psme2, chek1, tp53, rgcc, bub1bb	2363	59	13373	2.20618	0.0121724	0.0118072
GOTERM_BP	GO:0042274~ribosomal small subunit biogenesis	23	0.000267232	-3.57311	rps27.1, ngdn, rps21, snu13b, rps17, zgc:114188, rps8a, rps5, rps16, tsr2, bms1, rpsa, rps24, rps15, wdr3, rps7, si:dkey-251i10.3, rps28, rps10, rps6, rps14, rrp36, rps19	2363	59	13373	2.20618	0.0121724	0.0118072
GOTERM_BP	GO:0071345~cellular response to cytokine stimulus	36	0.000314194	-3.5028	ccl44, socs3b, lrtm1, stat4, ccl35.2, irak1, irak3, cxcl18b, socs3a, cxcl20, ccl34b.8, jagn1b, rtn4rl2b, ccl19a.2, crfb4, LRRC4C (1 of many), socs1b, ccl34b.1, csf1rb, flrt1b, cntf, irf5, rtn4rl2a, ccl34b.9, ccl38.1, cxcl32b.1, rtn4r, kitb, f3a, socs1a, cxcl11.6, csf1ra, ccl19a.1, cxcl11.5, dcn, cxcr3.2	2363	112	13373	1.81907	0.0140769	0.0136546
GOTERM_BP	GO:0042273~ribosomal large subunit biogenesis	22	0.000334203	-3.47599	rpl24, rsl1d1, rpl3, snu13b, rpl7a, eif6, nsa2, rpl5a, rpl10a, nop2, rpl23a, ftsj3, rpl6, rpl11, rpl12, rpl7, rpl14, sdad1, bxdc2, rpl35, rpl10, rpl35a	2363	56	13373	2.22331	0.0147175	0.0142759
GOTERM_BP	GO:0072358~cardiovascular system development	181	0.000344647	-3.46263	utp15, plxdc1, pdgfra, pkp2, gna13a, ajuba, foxj1a, cenpf, atp6ap1b, fn1b, tie1, npr3, atoh8, vcam1b, fgf24, ano6, foxn4, e2f8, angpt1, fzd6, thy1, pak2a, eif3ha, etv2, fzd2, loxl2b, sh3pxd2b, arap3, xirp2a, armc4, pgfb, snx5, stab1, ttc25, rnf213a, notch1b, smo, esco2, sema3e, mmp2, itga5, runx1, chrd, myh9a, srpx2, ttn.1, dhrs9, lgals2a, crip2, notch2, ccdc103, abca1a, ilk, gna12a, mafba, cdca8…	2363	809	13373	1.26618	0.0147175	0.0142759
GOTERM_BP	GO:0072359~circulatory system development	181	0.000344647	-3.46263	utp15, plxdc1, pdgfra, pkp2, gna13a, ajuba, foxj1a, cenpf, atp6ap1b, fn1b, tie1, npr3, atoh8, vcam1b, fgf24, ano6, foxn4, e2f8, angpt1, fzd6, thy1, pak2a, eif3ha, etv2, fzd2, loxl2b, sh3pxd2b, arap3, xirp2a, armc4, pgfb, snx5, stab1, ttc25, rnf213a, notch1b, smo, esco2, sema3e, mmp2, itga5, runx1, chrd, myh9a, srpx2, ttn.1, dhrs9, lgals2a, crip2, notch2, ccdc103, abca1a, ilk, gna12a, mafba, cdca8…	2363	809	13373	1.26618	0.0147175	0.0142759
GOTERM_BP	GO:0009967~positive regulation of signal transduction	77	0.000384269	-3.41536	lypd6, ccl44, g0s2, ticam1, bambib, ccl35.2, si:ch211-243a20.4, tespa1, inhbab, tnfrsf11a, CABZ01109021.1, gdf6b, CABZ01041494.1, ccl34b.8, f2r, dusp22b, cart3, tnfrsf9a, lpar6a, tgfb3, gpr183a, si:dkey-163m14.2, ccl34b.1, cntf, gadd45aa, gpr4, vangl2, ccl38.1, tnfrsfa, fas, pik3r6b, smo, CABZ01086734.1, tradd, ccl19a.1, sfrp1a, robo4, pik3r5, tnfrsf1a, myd88, ngfrb, lzts2a, gpr18, cart2, tnfrsf1…	2363	298	13373	1.46231	0.016157	0.0156723
GOTERM_BP	GO:0032270~positive regulation of cellular protein metabolic process	72	0.000403822	-3.39381	ccl44, tpx2, psme1, ccl35.2, cks1b, inhbab, tnfrsf11a, gdf6b, rnf19b, eif5a2, CABZ01041494.1, ccl34b.8, dusp22b, cart3, tnfrsf9a, tgfb3, baxb, rps9, gpr183a, rgcc, trib2, si:ch211-212k18.15, ccl34b.1, cntf, gadd45aa, ccl38.1, tnfrsfa, fas, si:dkey-27i16.2, pik3r6b, esco2, ccl19a.1, pmaip1, psme2, pik3r5, pycard, cdc20, tnfrsf1a, ngfrb, rplp1, cart2, tnfrsf19, ctsh, nradd, ccl19a.2, bmf1, il11a, t…	2363	275	13373	1.48172	0.0167219	0.0162202
GOTERM_BP	GO:0010562~positive regulation of phosphorus metabolic process	53	0.000479391	-3.31931	ccl44, tpx2, ccl35.2, cks1b, inhbab, tnfrsf11a, gdf6b, CABZ01041494.1, tshr, ccl34b.8, dusp22b, cart3, tnfrsf9a, tgfb3, gpr183a, rgcc, ccl34b.1, cntf, gadd45aa, ccl38.1, tnfrsfa, fas, si:dkey-27i16.2, pik3r6b, ccl19a.1, pik3r5, tnfrsf1a, ngfrb, rplp1, cart2, tnfrsf19, nradd, ccl19a.2, il11a, tgfb2, zgc:153631, zak, tnfrsf1b, cks2, relt, ccl34b.9, cxcl32b.1, bmp10, si:dkey-17m8.1, si:dkey-23c22.5,…	2363	189	13373	1.58701	0.0192673	0.0186892
GOTERM_BP	GO:0045937~positive regulation of phosphate metabolic process	53	0.000479391	-3.31931	ccl44, tpx2, ccl35.2, cks1b, inhbab, tnfrsf11a, gdf6b, CABZ01041494.1, tshr, ccl34b.8, dusp22b, cart3, tnfrsf9a, tgfb3, gpr183a, rgcc, ccl34b.1, cntf, gadd45aa, ccl38.1, tnfrsfa, fas, si:dkey-27i16.2, pik3r6b, ccl19a.1, pik3r5, tnfrsf1a, ngfrb, rplp1, cart2, tnfrsf19, nradd, ccl19a.2, il11a, tgfb2, zgc:153631, zak, tnfrsf1b, cks2, relt, ccl34b.9, cxcl32b.1, bmp10, si:dkey-17m8.1, si:dkey-23c22.5,…	2363	189	13373	1.58701	0.0192673	0.0186892
GOTERM_BP	GO:0006281~DNA repair	69	0.000506943	-3.29504	smc5, faap24, cdc7, h2afx, trip13, neil3, mnd1, mms22l, rad1, primpol, mgme1, haus3, rad51, fign, zgc:110224, pole, smc6, fen1, ube2t, CT025742.1, chaf1a, fanci, cry-dash, cry5, pcna, pif1, cdca5, zswim7, armh1, pole2, rpa2, eme1, msh6, fignl1, parpbp, wrnip1, dtl, dna2, pold1, hmga1a, rnaseh2a, fancd2, cenpx, setx, fancc, parp2, xrcc5, gins2, dclre1a, poln, tp53, eepd1, rps3, neil1, si:dkey-119f…	2363	263	13373	1.48477	0.0198822	0.0192857
GOTERM_BP	GO:1902533~positive regulation of intracellular signal transduction	48	0.000509241	-3.29308	ccl44, ticam1, ccl35.2, gpr18, tnfrsf11a, cart2, CABZ01041494.1, tnfrsf19, gpr65, ccl34b.8, f2r, nradd, irak4, dusp22b, ccl19a.2, cart3, tnfrsf9a, lpar6a, il11a, gpr183a, zgc:153631, si:dkey-163m14.2, ccl34b.1, zak, tnfrsf1b, cntf, gadd45aa, relt, gpr4, ccl34b.9, ccl38.1, cxcl32b.1, tnfrsfa, fas, si:dkey-17m8.1, si:dkey-23c22.5, pik3r6b, gpr55a, tradd, zgc:153759, gadd45bb, ccl19a.1, robo4, pik3r…	2363	167	13373	1.62663	0.0198822	0.0192857
GOTERM_BP	GO:0002244~hematopoietic progenitor cell differentiation	20	0.000521851	-3.28245	tnfrsf1b, ak2, cdca7a, irf7, batf, f11r.1, notch1b, dlc, f2r, csf3r, dld, dnmt3bb.1, ephx2, nfkbiaa, fosab, rps29, notch1a, myd88, cxcl8a, csf3a	2363	50	13373	2.26373	0.0200876	0.0194849
GOTERM_BP	GO:0000910~cytokinesis	15	0.000536526	-3.27041	kif20a, lzts2a, fbxo5, e2f7, ect2, prc1b, nusap1, snx18a, cep55l, e2f8, aurkb, zgc:86764, snx9b, kif23, snx33	2363	32	13373	2.65281	0.0203656	0.0197546
GOTERM_BP	GO:0001525~angiogenesis	69	0.0005673	-3.24619	utp15, plxdc1, amot, kif11, e2f7, dre-mir-221, tie1, dla, ano6, e2f8, lpar6a, angpt1, fzd6, thy1, fli1b, efna1a, etv2, gas6, loxl2b, alox5ap, hspg2, fli1a, fermt2, pgfb, arhgef9b, itgav, rnf213a, sema3e, fmnl3, itga5, robo4, dab2, myh9a, srpx2, lgals2a, abca1a, tnfrsf19, pdgfrb, nrxn3b, eif3i, rps29, hlx1, kdr, igfbp7, tp53, lpar2b, itgb3b, phkg1a, lpar1, loxl2a, adgrb1b, adgrg6, tars, rack1, ptk…	2363	264	13373	1.47914	0.0207407	0.0201184
GOTERM_BP	GO:0022616~DNA strand elongation	10	0.000569173	-3.24476	haus3, dna2, rnaseh2a, poln, pcna, fen1, parp2, gins1, lig1, pola1	2363	16	13373	3.53708	0.0207407	0.0201184
GOTERM_BP	GO:1902806~regulation of cell cycle G1/S phase transition	10	0.000569173	-3.24476	psme1, rb1, psme2, ccnd1, si:dkey-27i16.2, tp53, e2f7, cdc45, rgcc, pla2g4aa	2363	16	13373	3.53708	0.0207407	0.0201184
GOTERM_BP	GO:0044786~cell cycle DNA replication	7	0.000609833	-3.21479	orc3, e2f8, e2f7, cdc45, gins1, lig1, gins2	2363	8	13373	4.95191	0.0219299	0.0212719
GOTERM_BP	GO:0098542~defense response to other organism	44	0.000661589	-3.17941	ifng1, trim25, batf, mxa, hist1h2a11, tmem173, jagn1b, hist1h2a11, mpeg1.1, ifit12, ifit11, nod2, leap2, nod1, hist1h2a11, mpeg1.2, ncf1, hist1h2a4, mxf, dram1, ifit14, gig2i, irf5, ifit16, tlr3, ifit10, marco, hist1h2a3, rsad2, mxc, mxb, hist1h2a4, ifit8, hist1h2a11, ifit9, serinc5, tlr21, hist1h2a11, hist1h2a4, si:ch211-113a14.11, hist1h2a4, mxe, tnfrsf1a, hist1h2a4	2363	151	13373	1.64908	0.0234821	0.0227776
GOTERM_BP	GO:0050727~regulation of inflammatory response	13	0.000743913	-3.12848	caspb, bcl6ab, tnfaip8l2b, tlr3, caspbl, mmp9, tnfaip8l2a, metrnla, caspa, si:ch73-63e15.2, pycard, nlrc3l, zgc:171731	2363	26	13373	2.82967	0.0260656	0.0252835
GOTERM_BP	GO:0006310~DNA recombination	33	0.000899922	-3.0458	smc5, parpbp, cdc7, h2afx, trip13, cenpx, batf, mnd1, xrcc5, mms22l, gins2, rad51, fign, smc6, si:dkey-119f1.1, rad51d, recql4, exo1, cenps, si:dkey-51d8.9, gins4, cdc45, pif1, brca2, rpa3, tonsl, zswim7, rad51b, rpa2, eme1, lig1, msh6, fignl1	2363	105	13373	1.77865	0.0311327	0.0301986
GOTERM_BP	GO:0000028~ribosomal small subunit assembly	10	0.00102052	-2.99118	rps27.1, rps15, rps17, zgc:114188, rps28, rps5, rps10, rps14, rpsa, rps19	2363	17	13373	3.32902	0.034711	0.0336696
GOTERM_BP	GO:0030099~myeloid cell differentiation	46	0.00102876	-2.98769	npc1, irf8, casp8l2, melk, pak4, batf, rplp1, spi1b, tert, jagn1b, rpl27, ada2b, etv7, rpl11, rps29, tp53, rpl35, gpr183a, casp3a, rps3, rgs18, slc25a38a, si:dkey-103e21.5, rps14, etv2, csf3a, rps19, rps27.1, bcl6ab, slc7a7, mastl, fech, casp3b, gfi1ab, csf3r, tmem178, csf1ra, spi1a, runx1, casp8, tfe3a, nlrc3l, wdr66, bcl6b, rpl35a, zgc:194469	2363	163	13373	1.59711	0.034711	0.0336696
GOTERM_BP	GO:0010647~positive regulation of cell communication	77	0.0010729	-2.96944	lypd6, ccl44, g0s2, ticam1, bambib, ccl35.2, si:ch211-243a20.4, tespa1, inhbab, tnfrsf11a, CABZ01109021.1, gdf6b, CABZ01041494.1, ccl34b.8, f2r, dusp22b, cart3, tnfrsf9a, lpar6a, tgfb3, gpr183a, si:dkey-163m14.2, ccl34b.1, cntf, gadd45aa, gpr4, vangl2, ccl38.1, tnfrsfa, fas, pik3r6b, smo, CABZ01086734.1, tradd, ccl19a.1, sfrp1a, robo4, pik3r5, tnfrsf1a, myd88, ngfrb, lzts2a, gpr18, cart2, tnfrsf1…	2363	308	13373	1.41483	0.0357591	0.0346862
GOTERM_BP	GO:0044772~mitotic cell cycle phase transition	27	0.00114218	-2.94227	dtl, ccne1, psme1, bub1, e2f7, cdc25b, rb1, tp53, rgcc, bub1bb, fanci, mad2l1, gnl3, ndc80, bub1ba, lats2, mastl, si:dkey-27i16.2, cdc45, ccna2, cdca5, pla2g4aa, anapc10, ccnd1, psme2, chek1, ccne2	2363	81	13373	1.88644	0.0376094	0.0364809
GOTERM_BP	GO:0065004~protein-DNA complex assembly	40	0.00115719	-2.9366	FP340257.1, si:ch1073-159d7.7, CR354435.1, orc3, mis12, cenpx, cenpi, CU457819.5, si:dkey-148h10.5, zgc:173585, CU459186.3, rad51, mis18a, FP325123.2, zgc:110425, si:ch73-368j24.12, si:dkey-23a13.17, zgc:163061, chaf1a, zgc:173552, si:dkey-108k21.21, rad51d, si:ch1073-153i20.4, zgc:153405, si:ch73-368j24.11, CU459186.2, CU459186.6, si:ch211-113a14.12, anp32b, cenpn, cdc45, chaf1b, cenph, hist2h3c…	2363	137	13373	1.65236	0.0376499	0.0365203
GOTERM_BP	GO:0002011~morphogenesis of an epithelial sheet	26	0.00117369	-2.93045	fzd7b, npc1, gna13a, gna12a, lta4h, sox4a, dsc2l, sox19b, fzd10, sdc4, sdcbp2, sox11a, pfn1, sox4b, foxc1a, ctsba, rhoca, mpp5a, phactr4a, sfrp1a, fzd7a, ltb4r, arf6b, rhov, rhocb, gna13b	2363	77	13373	1.91094	0.0377376	0.0366053
GOTERM_BP	GO:0044770~cell cycle phase transition	27	0.00139614	-2.85507	dtl, ccne1, psme1, bub1, e2f7, cdc25b, rb1, tp53, rgcc, bub1bb, fanci, mad2l1, gnl3, ndc80, bub1ba, lats2, mastl, si:dkey-27i16.2, cdc45, ccna2, cdca5, pla2g4aa, anapc10, ccnd1, psme2, chek1, ccne2	2363	82	13373	1.86344	0.044368	0.0430368
GOTERM_BP	GO:0052547~regulation of peptidase activity	21	0.00155918	-2.8071	tnfrsf1b, tfpia, zgc:163030, si:busm1-57f23.1, bida, psme1, birc7, cenph, apaf1, ctsh, baxa, esco2, bcl2a, bmf1, pmaip1, casp8, psme2, baxb, tp53, pycard, pak2a	2363	58	13373	2.04907	0.0489797	0.0475102
GOTERM_BP	GO:0019220~regulation of phosphate metabolic process	84	0.00158491	-2.8	ccl44, lrtm1, socs3b, tpx2, ccl35.2, cks1b, inhbab, tnfrsf11a, fam83d, gdf6b, CABZ01041494.1, tshr, sh3bp5la, ccl34b.8, ppp1r14bb, dusp22b, cart3, spry4, tnfrsf9a, tgfb3, spry1, gpr183a, thy1, rgcc, trib2, LRRC4C (1 of many), socs1b, cnn2, ccl34b.1, cntf, flrt1b, gadd45aa, rtn4rl2a, mastl, ccl38.1, tnfrsfa, fas, si:dkey-27i16.2, drd2b, ccna2, pik3r6b, ccl19a.1, dcn, pik3r5, pik3ip1, tnfrsf1a, ngf…	2363	346	13373	1.37394	0.0492221	0.0477453
GOTERM_BP	GO:0072676~lymphocyte migration	13	0.00165617	-2.7809	ccl44, ccl35.2, ccl34b.9, cxcl32b.1, ccl38.1, ccl34b.8, cxcl11.6, ccl19a.2, ccl19a.1, cxcl11.5, gpr183a, ch25h, ccl34b.1	2363	28	13373	2.62755	0.0508574	0.0493315
GOTERM_BP	GO:0048568~embryonic organ development	114	0.00229083	-2.64001	pdgfra, pkp2, foxj1a, cenpf, macc1, sox4a, lrp5, hps5, atoh8, fgf24, snrkb, foxn4, fzd6, etv2, csf3a, fzd2, dcdc2b, disc1, ttc25, smo, csf3r, loxl3b, sfrp1a, itga5, runx1, egr1, chrd, wnt3a, igf2a, dhrs9, ccdc103, wls, egfl6, jag1b, pmm2, pls3, pdgfrb, cemip2, gfpt1, mfap2, pkd2, caspa, atp1b2b, pkn2, rbck1, lama1, sox3, invs, adgrg6, ahsa1a, sox4b, lama4, gpc4, otx1, foxc1a, egr2b, mkxa, sec24d,…	2363	499	13373	1.29291	0.069565	0.0674778
GOTERM_BP	GO:0000082~G1/S transition of mitotic cell cycle	11	0.00237004	-2.62524	ccne1, lats2, rb1, ccnd1, si:dkey-27i16.2, ccne2, tp53, e2f7, cdc45, rgcc, cdca5	2363	22	13373	2.82967	0.0700271	0.0679261
GOTERM_BP	GO:0048919~posterior lateral line neuromast development	13	0.00237623	-2.62411	rtn4rl2a, shroom3, rspo3, tnfrsf19, socs3a, stat3, slc12a5b, tgfb1a, smad5, erbb2, s1pr2, atp1b2b, ngfrb	2363	29	13373	2.53694	0.0700271	0.0679261
GOTERM_BP	GO:0000226~microtubule cytoskeleton organization	56	0.00238703	-2.62214	kif11, knstrn, rgs14a, prc1b, zmynd10, nusap1, map7d3, haus3, mybl2b, fign, kif18a, si:dkey-25o16.4, rock2bl, vangl2, plk4, map4l, rsph9, sass6, rp1l1b, CABZ01055306.1, ccdc40, fignl1, lzts2a, ccdc103, daw1, arhgef10, haus4, ttll6, cep57l1, tacc3, gapdh, stmn1a, ska3, ska1, dnaaf1, stmn3, zgc:86764, poln, tppp3, rock2b, ndc80, haus5, si:ch211-197l9.2, birc7, stil, brca2, map7a, katna1, aurka, aur…	2363	216	13373	1.46723	0.0700271	0.0679261
GOTERM_BP	GO:0021782~glial cell development	17	0.00240854	-2.61825	irf8, cntf, prdm8, ndrg1a, adgrg1, gna13a, adgrg6, tuba8l3, slc7a7, arhgef10, gna12a, aldh1a2, egr2b, smo, erbb2, nlrc3l, gna13b	2363	44	13373	2.18656	0.0700271	0.0679261
GOTERM_BP	GO:0007076~mitotic chromosome condensation	6	0.00261994	-2.58171	smc2, ncapd3, ncaph, ncapd2, ncapg, cdca5	2363	7	13373	4.85086	0.0745865	0.0723486
GOTERM_BP	GO:0031348~negative regulation of defense response	6	0.00261994	-2.58171	metrnla, tnfaip8l2b, nlrc3l, irak3, socs1a, tnfaip8l2a	2363	7	13373	4.85086	0.0745865	0.0723486
GOTERM_BP	GO:0009792~embryo development ending in birth or egg hatching	108	0.00264949	-2.57684	zeb2b, pdgfra, her15.1, macc1, fn1b, dvl2, lrp5, orc1, rplp2l, dio2, rpl28, gart, fzd6, rps14, rpl24, disc1, smo, loxl3b, itga5, egr1, chrd, hes6, wnt3a, igf2a, mob1a, myh9b, dhrs9, rps8a, smtnl, wls, pmm2, pls3, pdgfrb, rps7, ascl1b, gfpt1, tp53bp2a, caspa, rps29, rpl35, eef2b, rps3, tbx6, pkn2, rbck1, ahsa1a, rplp0, gpc4, foxc1a, rpl38, mkxa, dlc, sec24d, gadd45bb, mdka, plcb3, npc1, susd4, gli…	2363	471	13373	1.29768	0.0746502	0.0724104
GOTERM_BP	GO:0048884~neuromast development	20	0.00314186	-2.50281	dcdc2b, aldh1l1, rtn4rl2a, shroom3, dkk2, rspo3, tnfrsf19, socs3a, stat3, slc12a5b, cd74a, tgfb1a, smad5, edn1, erbb2, s1pr2, rgs18, atp1b2b, ngfrb, cd74b	2363	57	13373	1.98573	0.0876193	0.0849904
GOTERM_BP	GO:0032835~glomerulus development	18	0.00317453	-2.49832	gli2a, anln, shroom3, mafba, slc43a1a, aldh1a2, myo1cb, foxc1a, apol1, osr1, iqgap2, myo1ca, wt1b, ponzr1, plce1, crb2b, myh9a, p4htm	2363	49	13373	2.07894	0.0876361	0.0850067
GOTERM_BP	GO:0035850~epithelial cell differentiation involved in kidney development	13	0.00333201	-2.47729	anln, shroom3, slc43a1a, aldh1a2, foxc1a, apol1, osr1, iqgap2, wt1b, crb2b, myh9a, etv5a, etv4	2363	30	13373	2.45238	0.0894733	0.0867888
GOTERM_BP	GO:0031401~positive regulation of protein modification process	53	0.0033556	-2.47423	ccl44, tpx2, ccl35.2, cks1b, inhbab, tnfrsf11a, gdf6b, CABZ01041494.1, ccl34b.8, dusp22b, cart3, tnfrsf9a, tgfb3, gpr183a, rgcc, ccl34b.1, cntf, gadd45aa, ccl38.1, tnfrsfa, fas, si:dkey-27i16.2, pik3r6b, ccl19a.1, pik3r5, cdc20, tnfrsf1a, ngfrb, rplp1, cart2, tnfrsf19, nradd, ccl19a.2, il11a, tp53, tgfb2, zgc:153631, zak, tnfrsf1b, cks2, relt, ccl34b.9, cxcl32b.1, bmp10, si:dkey-17m8.1, si:dkey-2…	2363	205	13373	1.46314	0.0894733	0.0867888
GOTERM_BP	GO:0061640~cytoskeleton-dependent cytokinesis	8	0.00337203	-2.47211	snx18a, cep55l, aurkb, fbxo5, snx9b, nusap1, kif23, snx33	2363	13	13373	3.48267	0.0894733	0.0867888
GOTERM_BP	GO:0000281~mitotic cytokinesis	8	0.00337203	-2.47211	snx18a, cep55l, aurkb, fbxo5, snx9b, nusap1, kif23, snx33	2363	13	13373	3.48267	0.0894733	0.0867888
GOTERM_BP	GO:0006334~nucleosome assembly	30	0.00348251	-2.45811	FP340257.1, si:ch1073-159d7.7, CR354435.1, CU457819.5, si:dkey-148h10.5, zgc:173585, CU459186.3, mis18a, FP325123.2, zgc:110425, si:ch73-368j24.12, si:dkey-23a13.17, zgc:163061, chaf1a, zgc:173552, si:dkey-108k21.21, si:ch1073-153i20.4, zgc:153405, si:ch73-368j24.11, CU459186.2, CU459186.6, si:ch211-113a14.12, anp32b, chaf1b, hist2h3c, si:dkey-108k21.10, FP236812.1, si:ch211-113a14.11, si:ch211-1…	2363	100	13373	1.6978	0.0915163	0.0887704
GOTERM_BP	GO:2000145~regulation of cell motility	45	0.00352794	-2.45248	aldh1l1, nkd1, foxj1a, sema6d, cxcr3.1, anxa5b, cxcl18b, sema3fb, dre-mir-221, tnfrsf19, cxcl20, srgap2, smad5, mmp14b, sema3fa, s1pr2, sema3gb, gpr183a, thy1, wasb, itgb3b, cnn2, lama1, rtn4rl2a, pgfb, lama4, gpc4, ptk2ba, rac2, cxcr4b, inpp5d, cxcl11.6, tgfb1a, zap70, sema3e, csf1ra, srgap1a, plxnc1, cxcl11.5, prcp, robo4, sinhcaf, inppl1a, ngfrb, stk10	2363	168	13373	1.51589	0.0918271	0.089072
GOTERM_BP	GO:0070486~leukocyte aggregation	18	0.0040322	-2.39446	tec, ada, irf7, batf, tnfaip8l2b, cd83, il7r, gpr18, jak1, tnfaip8l2a, cd74a, jak3, CABZ01066725.1, zap70, gpr183a, thy1, rpl22, ikzf1	2363	50	13373	2.03736	0.101101	0.0980674
GOTERM_BP	GO:0007051~spindle organization	18	0.0040322	-2.39446	lzts2a, si:dkey-25o16.4, kif11, haus5, arhgef10, knstrn, haus4, rgs14a, birc7, stil, haus3, mybl2b, aurkb, poln, aspm, haus1, haus6, kif23	2363	50	13373	2.03736	0.101101	0.0980674
GOTERM_BP	GO:0007159~leukocyte cell-cell adhesion	18	0.0040322	-2.39446	tec, ada, irf7, batf, tnfaip8l2b, cd83, il7r, gpr18, jak1, tnfaip8l2a, cd74a, jak3, CABZ01066725.1, zap70, gpr183a, thy1, rpl22, ikzf1	2363	50	13373	2.03736	0.101101	0.0980674
GOTERM_BP	GO:0070489~T cell aggregation	18	0.0040322	-2.39446	tec, ada, irf7, batf, tnfaip8l2b, cd83, il7r, gpr18, jak1, tnfaip8l2a, cd74a, jak3, CABZ01066725.1, zap70, gpr183a, thy1, rpl22, ikzf1	2363	50	13373	2.03736	0.101101	0.0980674
GOTERM_BP	GO:0021523~somatic motor neuron differentiation	5	0.00417068	-2.37979	gli2a, dld, notch1a, tbx6, smo	2363	5	13373	5.65933	0.103622	0.100513
GOTERM_BP	GO:0061005~cell differentiation involved in kidney development	13	0.00457536	-2.33957	anln, shroom3, slc43a1a, aldh1a2, foxc1a, apol1, osr1, iqgap2, wt1b, crb2b, myh9a, etv5a, etv4	2363	31	13373	2.37327	0.112653	0.109273
GOTERM_BP	GO:0030336~negative regulation of cell migration	14	0.00487007	-2.31247	aldh1l1, rtn4rl2a, cxcr4b, tnfrsf19, inpp5d, srgap2, tgfb1a, smad5, srgap1a, sinhcaf, s1pr2, thy1, inppl1a, ngfrb	2363	35	13373	2.26373	0.118473	0.114918
GOTERM_BP	GO:0030334~regulation of cell migration	42	0.00500331	-2.30074	aldh1l1, sema6d, cxcr3.1, cxcl18b, sema3fb, dre-mir-221, tnfrsf19, cxcl20, srgap2, smad5, mmp14b, sema3fa, s1pr2, sema3gb, gpr183a, thy1, wasb, itgb3b, cnn2, lama1, rtn4rl2a, pgfb, lama4, gpc4, ptk2ba, rac2, cxcr4b, inpp5d, cxcl11.6, tgfb1a, zap70, sema3e, csf1ra, srgap1a, plxnc1, cxcl11.5, prcp, robo4, sinhcaf, inppl1a, ngfrb, stk10	2363	157	13373	1.51396	0.118473	0.114918
GOTERM_BP	GO:0000027~ribosomal large subunit assembly	9	0.00500543	-2.30056	rpl24, rpl6, rpl3, rpl11, rpl12, rpl5a, bxdc2, rpl10, rpl23a	2363	17	13373	2.99612	0.118473	0.114918
GOTERM_BP	GO:0007052~mitotic spindle organization	9	0.00500543	-2.30056	aurka, ndc80, lrmp, wdr62, aurkb, sass6, stil, cenph, kif23	2363	17	13373	2.99612	0.118473	0.114918
GOTERM_BP	GO:0072010~glomerular epithelium development	11	0.00511518	-2.29114	anln, iqgap2, wt1b, shroom3, crb2b, myh9a, slc43a1a, aldh1a2, foxc1a, apol1, osr1	2363	24	13373	2.59386	0.118473	0.114918
GOTERM_BP	GO:0061318~renal filtration cell differentiation	11	0.00511518	-2.29114	anln, iqgap2, wt1b, shroom3, crb2b, myh9a, slc43a1a, aldh1a2, foxc1a, apol1, osr1	2363	24	13373	2.59386	0.118473	0.114918
GOTERM_BP	GO:0072311~glomerular epithelial cell differentiation	11	0.00511518	-2.29114	anln, iqgap2, wt1b, shroom3, crb2b, myh9a, slc43a1a, aldh1a2, foxc1a, apol1, osr1	2363	24	13373	2.59386	0.118473	0.114918
GOTERM_BP	GO:0006563~L-serine metabolic process	6	0.00597012	-2.22402	si:ch73-263o4.4, phgdh, psph, psat1, cbsa, shmt1	2363	8	13373	4.2445	0.133741	0.129728
GOTERM_BP	GO:0009263~deoxyribonucleotide biosynthetic process	6	0.00597012	-2.22402	rrm1, dctd, tyms, dtymk, rrm2, rrm2	2363	8	13373	4.2445	0.133741	0.129728
GOTERM_BP	GO:0032963~collagen metabolic process	6	0.00597012	-2.22402	pkd1a, p3h1, pkd2, mmp30, p3h3, mmp9	2363	8	13373	4.2445	0.133741	0.129728
GOTERM_BP	GO:1903707~negative regulation of hemopoiesis	6	0.00597012	-2.22402	f2r, tmem178, nfkbiaa, irf7, spi1b, gpr65	2363	8	13373	4.2445	0.133741	0.129728
GOTERM_BP	GO:0045931~positive regulation of mitotic cell cycle	7	0.00619336	-2.20807	cdc25b, ndc80, espl1, pmaip1, ccnd1, cdc45, cdca5	2363	11	13373	3.60139	0.135874	0.131798
GOTERM_BP	GO:0045005~DNA-dependent DNA replication maintenance of fidelity	7	0.00619336	-2.20807	pold1, rad51, cenps, cenpx, eme1, tonsl, mms22l	2363	11	13373	3.60139	0.135874	0.131798
GOTERM_BP	GO:0007219~Notch signaling pathway	23	0.00621611	-2.20648	maml1, adam10a, ptbp1a, notch2, plvapb, her15.1, rras, dlb, snx5, crb2a, CABZ01109021.1, foxc1a, notch1b, dlc, jag1b, dla, dld, notchl, notch1a, dab2, jag1a, tspan14, lfng	2363	73	13373	1.78308	0.135874	0.131798
GOTERM_BP	GO:0001654~eye development	82	0.00626424	-2.20313	fgfrl1a, tdrd7b, mvp, adcyap1b, her15.1, odc1, wwtr1, atp6ap1b, sox4a, slbp, atoh8, fgf24, dio2, eif3ea, lamb1a, foxn4, sox21b, gart, fen1, thy1, sox11a, mmp14a, sh3pxd2b, myb, vangl2, obscnb, snx5, ccna2, nes, mcm3, cerkl, smo, slc12a5b, tcf7l1a, rfc4, mpp5a, hsp70.3, nsfb, sfrp1a, tfap2a, tyms, itga5, ccnd1, egr1, ctsd, pim1, rp1l1b, lgsn, rx1, nek2, nkd1, nfkb1, foxc1b, crb2a, aldh1a2, hbegfa,…	2363	353	13373	1.31463	0.135874	0.131798
GOTERM_BP	GO:2000146~negative regulation of cell motility	14	0.00641156	-2.19304	aldh1l1, rtn4rl2a, cxcr4b, tnfrsf19, inpp5d, srgap2, tgfb1a, smad5, srgap1a, sinhcaf, s1pr2, thy1, inppl1a, ngfrb	2363	36	13373	2.20085	0.137975	0.133835
GOTERM_BP	GO:0006333~chromatin assembly or disassembly	31	0.00686952	-2.16307	FP340257.1, si:ch1073-159d7.7, CR354435.1, CU457819.5, si:dkey-148h10.5, zgc:173585, CU459186.3, mis18a, FP325123.2, zgc:110425, si:ch73-368j24.12, si:dkey-23a13.17, zgc:163061, chaf1a, zgc:173552, si:dkey-108k21.21, si:ch1073-153i20.4, zgc:153405, si:ch73-368j24.11, CU459186.2, CU459186.6, si:ch211-113a14.12, anp32b, chaf1b, hist2h3c, si:dkey-108k21.10, FP236812.1, si:ch211-113a14.11, si:ch211-1…	2363	109	13373	1.60953	0.146675	0.142274
GOTERM_BP	GO:0034341~response to interferon-gamma	11	0.00719604	-2.14291	ccl44, ccl19a.2, ccl19a.1, ccl34b.9, ccl35.2, cxcl32b.1, ccl38.1, socs1b, ccl34b.1, socs1a, ccl34b.8	2363	25	13373	2.49011	0.148991	0.14452
GOTERM_BP	GO:0002218~activation of innate immune response	11	0.00719604	-2.14291	tlr21, trim25, tlr1, tlr3, irak1, unc93b1, tmem173, cntrl, irak3, myd88, cd40	2363	25	13373	2.49011	0.148991	0.14452
GOTERM_BP	GO:0070555~response to interleukin-1	11	0.00719604	-2.14291	ccl44, ccl19a.2, ccl19a.1, ccl34b.9, ccl35.2, cxcl32b.1, ccl38.1, irak1, irak3, ccl34b.1, ccl34b.8	2363	25	13373	2.49011	0.148991	0.14452
GOTERM_BP	GO:0002221~pattern recognition receptor signaling pathway	11	0.00719604	-2.14291	tlr21, trim25, tlr1, tlr3, irak1, unc93b1, tmem173, cntrl, irak3, myd88, cd40	2363	25	13373	2.49011	0.148991	0.14452
GOTERM_BP	GO:0031497~chromatin assembly	30	0.00738614	-2.13158	FP340257.1, si:ch1073-159d7.7, CR354435.1, CU457819.5, si:dkey-148h10.5, zgc:173585, CU459186.3, mis18a, FP325123.2, zgc:110425, si:ch73-368j24.12, si:dkey-23a13.17, zgc:163061, chaf1a, zgc:173552, si:dkey-108k21.21, si:ch1073-153i20.4, zgc:153405, si:ch73-368j24.11, CU459186.2, CU459186.6, si:ch211-113a14.12, anp32b, chaf1b, hist2h3c, si:dkey-108k21.10, FP236812.1, si:ch211-113a14.11, si:ch211-1…	2363	105	13373	1.61695	0.150719	0.146197
GOTERM_BP	GO:0030855~epithelial cell differentiation	40	0.0073898	-2.13137	tdrd7b, e2f7, slc43a1a, aldh1a2, tnfrsf19, socs3a, osr1, stat3, jag1b, ada2b, iqgap2, ascl1a, wt1b, e2f8, errfi1a, s1pr2, etv5a, casp3a, atp1b2b, anln, dcdc2b, shroom3, casp3b, tcf7l1b, foxc1a, apol1, stab2, smo, dlc, tcf7l1a, cldn5a, tgfb1a, insm1a, rilpl2, itga5, myh11a, crb2b, myh9a, etv4, grhl1	2363	151	13373	1.49916	0.150719	0.146197
GOTERM_BP	GO:0007423~sensory organ development	112	0.00748666	-2.12571	mvp, adcyap1b, her15.1, atp6ap1b, sox4a, slbp, atoh8, fgf24, dio2, foxn4, sox21b, gart, thy1, rgs18, cd74b, sh3pxd2b, dcdc2b, rtn4rl2a, obscnb, snx5, ttc25, smo, rfc4, hsp70.3, nsfb, sfrp1a, itga5, ccnd1, egr1, ctsd, chrd, pim1, grhl1, nek2, nfkb1, crb2a, wls, tnfrsf19, socs3a, stat3, jag1b, uhrf1, mfap2, atp1b2b, mcm2, lama1, sox3, adgrg6, poc1b, cdipt, sox4b, gpc4, otx1, foxc1a, dkk2, cd74a, tg…	2363	507	13373	1.25019	0.151563	0.147016
GOTERM_BP	GO:1902105~regulation of leukocyte differentiation	9	0.00763149	-2.11739	irf8, zap70, tmem178, irf7, spi1a, si:ch211-243a20.4, runx1, tfe3a, spi1b	2363	18	13373	2.82967	0.153359	0.148758
GOTERM_BP	GO:0051225~spindle assembly	14	0.00831656	-2.08006	lzts2a, kif11, haus5, arhgef10, haus4, birc7, stil, haus3, mybl2b, aurkb, poln, haus1, haus6, kif23	2363	37	13373	2.14137	0.165906	0.160928
GOTERM_BP	GO:0002688~regulation of leukocyte chemotaxis	10	0.0089885	-2.04631	cxcl11.6, csf1ra, pgfb, cxcl11.5, ptk2ba, cxcr4b, cxcl18b, inppl1a, inpp5d, cxcl20	2363	22	13373	2.57242	0.178011	0.17267
GOTERM_BP	GO:0048916~posterior lateral line development	18	0.00955719	-2.01967	rtn4rl2a, shroom3, f11r.1, esr1, cxcr4b, rspo3, tnfrsf19, socs3a, stat3, slc12a5b, canx, tgfb1a, smad5, erbb2, yap1, s1pr2, atp1b2b, ngfrb	2363	54	13373	1.88644	0.187912	0.182274
GOTERM_BP	GO:0048925~lateral line system development	28	0.00984028	-2.00699	aldh1l1, f11r.1, tnfrsf19, socs3a, stat3, smad5, erbb2, s1pr2, atp1b2b, rgs18, cd74b, eif3ha, dcdc2b, adgrg6, rtn4rl2a, shroom3, esr1, cxcr4b, dkk2, rspo3, egr2b, slc12a5b, cd74a, canx, tgfb1a, edn1, yap1, ngfrb	2363	98	13373	1.61695	0.190049	0.184347
GOTERM_BP	GO:0048880~sensory system development	28	0.00984028	-2.00699	aldh1l1, f11r.1, tnfrsf19, socs3a, stat3, smad5, erbb2, s1pr2, atp1b2b, rgs18, cd74b, eif3ha, dcdc2b, adgrg6, rtn4rl2a, shroom3, esr1, cxcr4b, dkk2, rspo3, egr2b, slc12a5b, cd74a, canx, tgfb1a, edn1, yap1, ngfrb	2363	98	13373	1.61695	0.190049	0.184347
GOTERM_BP	GO:0009069~serine family amino acid metabolic process	11	0.00987447	-2.00549	si:ch73-263o4.4, phgdh, psph, ahcy, psat1, tha1, gcshb, cbsa, dhfr, shmt1, amt	2363	26	13373	2.39433	0.190049	0.184347
GOTERM_BP	GO:0002253~activation of immune response	29	0.0104924	-1.97912	cd79b, trim25, CU861476.1, klhl6, si:ch211-243a20.4, tlr5b, tespa1, irak1, tmem173, irak3, CABZ01041494.1, c1qc, fpr1, cfbl, thy1, tlr3, c1qb, tlr5a, c1qa, tlr21, zap70, si:ch211-214p13.9, tlr1, skap2, rftn1a, unc93b1, cntrl, myd88, cd40	2363	103	13373	1.5934	0.198788	0.192824
GOTERM_BP	GO:0010631~epithelial cell migration	15	0.0105045	-1.97862	loxl2b, loxl2a, hspg2, amot, bace2, slc24a5, dre-mir-221, zap70, csf1ra, itga5, rab13, prcp, robo4, acvrl1, cnn2	2363	42	13373	2.02119	0.198788	0.192824
GOTERM_BP	GO:0001578~microtubule bundle formation	13	0.0106195	-1.9739	ccdc103, daw1, ttll6, si:ch211-197l9.2, prc1b, zmynd10, dnaaf1, rsph9, tppp3, rp1l1b, stk36, CABZ01055306.1, ccdc40	2363	34	13373	2.16386	0.198788	0.192824
GOTERM_BP	GO:0031349~positive regulation of defense response	13	0.0106195	-1.9739	trim25, tlr3, irak1, tmem173, irak3, mmp9, tlr21, tlr1, unc93b1, cntrl, myd88, tlr22, cd40	2363	34	13373	2.16386	0.198788	0.192824
GOTERM_BP	GO:0033260~nuclear DNA replication	5	0.0107585	-1.96825	orc3, cdc45, gins1, lig1, gins2	2363	6	13373	4.71611	0.200021	0.19402
GOTERM_BP	GO:0072310~glomerular epithelial cell development	9	0.0111712	-1.9519	anln, iqgap2, shroom3, crb2b, myh9a, slc43a1a, aldh1a2, foxc1a, apol1	2363	19	13373	2.68074	0.206291	0.200101
GOTERM_BP	GO:0031297~replication fork processing	6	0.0114888	-1.93972	rad51, cenps, cenpx, eme1, tonsl, mms22l	2363	9	13373	3.77289	0.210731	0.204409
GOTERM_BP	GO:0072006~nephron development	21	0.0117354	-1.9305	gli2a, anln, shroom3, mafba, slc43a1a, aldh1a2, myo1cb, foxc1a, apol1, osr1, iqgap2, myo1ca, wt1b, ponzr1, pkd2, plce1, crb2b, myh9a, p4htm, etv5a, etv4	2363	68	13373	1.74773	0.213818	0.207403
GOTERM_BP	GO:1905114~cell surface receptor signaling pathway involved in cell-cell signaling	52	0.0118778	-1.92526	fzd7b, ccdc88c, lypd6, tob1a, bambib, npffl, prdm5, trabd2b, csrp1a, dvl2, lrp5, fzd10, fzd6, fzd2, rgs3a, fermt2, vangl2, ctnnb2, wif1, tcf7l1b, smo, CABZ01086734.1, tcf7l1a, trabd2a, rab8b, wnt7aa, sfrp1a, wnt3a, wnt7bb, lzts2a, pygo1, nkd1, npas4a, jun, wls, CR388166.1, fam53b, sybu, dvl3a, jupa, tpbga, ptk7a, invs, iqgap1, rack1, btk, dkk2, rspo3, ugdh, fzd7a, dub, sfrp1b	2363	213	13373	1.38162	0.214616	0.208176
GOTERM_BP	GO:0001501~skeletal system development	64	0.0119362	-1.92313	fgfrl1a, loxa, npc1, pdgfra, aldh1l1, prdm5, macc1, wwtr1, lrp5, rap1b, acana, eif3ea, creb3l2, mmp14b, fzd6, s1pr2, nsd2, loxl2b, mmp14a, sh3pxd2b, spp1, disc1, hapln3, smo, loxl3b, ponzr1, tfap2a, dcn, itga5, runx1, egr1, dhrs9, notch2, phospho1, aldh1a2, wls, acanb, jag1b, acvr2aa, pmm2, zic2b, pdgfrb, pls3, gfpt1, caspa, ptk7a, pkn2, rbck1, inka1a, loxl2a, ahsa1a, sparc, gpc4, vcanb, mkxa, se…	2363	272	13373	1.33161	0.214616	0.208176
GOTERM_BP	GO:0030217~T cell differentiation	10	0.0124934	-1.90332	jak3, tec, CABZ01066725.1, batf, il7r, gpr183a, rpl22, gpr18, ikzf1, jak1	2363	23	13373	2.46058	0.223166	0.21647
GOTERM_BP	GO:0060026~convergent extension	37	0.013147	-1.88117	fzd7b, zeb2b, lzts2a, gna13a, ier2a, csrp1a, rap1b, dvl2, dsc2l, smad5, dnaaf1, mmp14b, dvl3a, s1pr2, ptk7a, eaf2, fzd2, invs, mmp14a, lats2, vangl2, ctnnb2, pfn1, gpc4, rack1, disc1, mcamb, ctsba, lpp, tax1bp3, fibpb, fzd7a, dcn, chrd, wnt3a, def6a, gna13b	2363	142	13373	1.47461	0.233316	0.226316
GOTERM_BP	GO:0060348~bone development	11	0.013249	-1.87782	jag1b, npc1, sh3pxd2b, notch2, csf1ra, spp1, edn1, ctsk, phospho1, disc1, rap1b	2363	27	13373	2.30565	0.23361	0.226601
GOTERM_BP	GO:0043010~camera-type eye development	66	0.0150904	-1.8213	tdrd7b, adcyap1b, wwtr1, atp6ap1b, sox4a, slbp, atoh8, fgf24, dio2, eif3ea, foxn4, sox21b, gart, fen1, thy1, sox11a, mmp14a, obscnb, snx5, ccna2, nes, mcm3, cerkl, smo, slc12a5b, tcf7l1a, rfc4, mpp5a, hsp70.3, nsfb, sfrp1a, tfap2a, tyms, itga5, ccnd1, egr1, ctsd, pim1, rp1l1b, lgsn, rx1, foxc1b, crb2a, aldh1a2, hbegfa, marcksa, socs3a, stat3, uhrf1, mcm2, lama1, gnl3, cdipt, poc1b, sox4b, pax10, …	2363	285	13373	1.31058	0.264373	0.256441
GOTERM_BP	GO:0048598~embryonic morphogenesis	135	0.0152852	-1.81573	fzd7b, zeb2b, pdgfra, pkp2, gna13a, pak4, foxj1a, cenpf, macc1, sox4a, dvl2, lrp5, atoh8, fgf24, snrkb, mmp14b, foxn4, fzd6, sdc4, etv2, rac1a, fzd2, dcdc2b, disc1, ttc25, smo, loxl3b, sfrp1a, itga5, egr1, chrd, arf6b, myh9b, dhrs9, lzts2a, ccdc103, gna12a, crb2a, wls, lta4h, osr1, stat3, jag1b, dsc2l, pmm2, pls3, pdgfrb, sox19b, cemip2, gfpt1, mfap2, pkd2, caspa, atp1b2b, pkn2, dusp5, rbck1, sdc…	2363	639	13373	1.19563	0.266079	0.258096
GOTERM_BP	GO:0072009~nephron epithelium development	15	0.0161683	-1.79134	anln, shroom3, slc43a1a, aldh1a2, foxc1a, apol1, osr1, iqgap2, wt1b, ponzr1, pkd2, crb2b, myh9a, etv5a, etv4	2363	44	13373	1.92932	0.279306	0.270926
GOTERM_BP	GO:0034728~nucleosome organization	30	0.0162494	-1.78916	FP340257.1, si:ch1073-159d7.7, CR354435.1, CU457819.5, si:dkey-148h10.5, zgc:173585, CU459186.3, mis18a, FP325123.2, zgc:110425, si:ch73-368j24.12, si:dkey-23a13.17, zgc:163061, chaf1a, zgc:173552, si:dkey-108k21.21, si:ch1073-153i20.4, zgc:153405, si:ch73-368j24.11, CU459186.2, CU459186.6, si:ch211-113a14.12, anp32b, chaf1b, hist2h3c, si:dkey-108k21.10, FP236812.1, si:ch211-113a14.11, si:ch211-1…	2363	111	13373	1.52955	0.279306	0.270926
GOTERM_BP	GO:0035082~axoneme assembly	10	0.0169203	-1.77159	ccdc103, dnaaf1, daw1, rsph9, ttll6, zmynd10, rp1l1b, stk36, CABZ01055306.1, ccdc40	2363	24	13373	2.35805	0.287224	0.278606
GOTERM_BP	GO:0071346~cellular response to interferon-gamma	10	0.0169203	-1.77159	ccl44, ccl19a.2, ccl19a.1, ccl34b.9, ccl35.2, cxcl32b.1, ccl38.1, ccl34b.1, socs1a, ccl34b.8	2363	24	13373	2.35805	0.287224	0.278606
GOTERM_BP	GO:0031101~fin regeneration	20	0.0174124	-1.75914	aldh1a2, acanb, cxcr4b, ctsba, mmp9, anxa1a, notch1b, jag1b, hspd1, serpinh1b, esco2, hapln1a, lamb1a, fam53b, erbb2, col1a1a, yap1, ttk, hspa8, lfng	2363	66	13373	1.71495	0.291197	0.28246
GOTERM_BP	GO:0051304~chromosome separation	12	0.0174739	-1.75761	mad2l1, bub1ba, ndc80, espl1, ncapd3, cenps, cenpx, bub1, ttk, eme1, bub1bb, anapc10	2363	32	13373	2.12225	0.291197	0.28246
GOTERM_BP	GO:0045089~positive regulation of innate immune response	12	0.0174739	-1.75761	tlr21, trim25, tlr1, tlr3, irak1, unc93b1, tmem173, cntrl, irak3, tlr22, myd88, cd40	2363	32	13373	2.12225	0.291197	0.28246
GOTERM_BP	GO:0031399~regulation of protein modification process	81	0.0178125	-1.74927	ccl44, lrtm1, socs3b, tpx2, ccl35.2, cks1b, inhbab, tnfrsf11a, fam83d, gdf6b, CABZ01041494.1, sh3bp5la, ccl34b.8, ppp1r14bb, dusp22b, cart3, spry4, tnfrsf9a, tgfb3, spry1, gpr183a, thy1, rgcc, trib2, LRRC4C (1 of many), socs1b, cnn2, ccl34b.1, cntf, flrt1b, gadd45aa, rtn4rl2a, mastl, ccl38.1, tnfrsfa, fas, si:dkey-27i16.2, ccna2, pik3r6b, ccl19a.1, dcn, pik3r5, cdc20, tnfrsf1a, ngfrb, rplp1, irak…	2363	363	13373	1.26283	0.29504	0.286188
GOTERM_BP	GO:0016331~morphogenesis of embryonic epithelium	16	0.0187677	-1.72659	sox11a, vangl2, shroom3, nkd1, sox4b, foxc1a, sox4a, dvl2, neurod4, smo, mpp5a, phactr4a, sfrp1a, mdka, dvl3a, pard6a	2363	49	13373	1.84794	0.308988	0.299718
GOTERM_BP	GO:0055016~hypochord development	4	0.0191035	-1.71889	dla, lamb1a, notch1a, lfng	2363	4	13373	5.65933	0.310773	0.301449
GOTERM_BP	GO:0050728~negative regulation of inflammatory response	4	0.0191035	-1.71889	metrnla, tnfaip8l2b, nlrc3l, tnfaip8l2a	2363	4	13373	5.65933	0.310773	0.301449
GOTERM_BP	GO:0042981~regulation of apoptotic process	101	0.0195497	-1.70886	melk, fadd, adgrg1, nme8, inhbab, tnfrsf11a, rassf3, baxb, nod2, pak2a, gbp3, zgc:174906, tnfrsfa, nme2a, sgk2b, tradd, si:ch211-195b13.1, esco2, pmaip1, pim1, perp, casp8l2, fancd2, bnip4, socs3a, ctsh, caspa, zgc:153631, si:dkey-103e21.5, badb, tnfrsf1b, bida, ptk2ba, apaf1, si:dkey-10c21.1, tgfb1a, tgfb1b, tnfsf10l, aurkb, casp8, yap1, bmp7b, grinab, dlg5b.1, socs3b, g0s2, card11, gdf6b, bcl2l…	2363	467	13373	1.22397	0.312555	0.303178
GOTERM_BP	GO:0033077~T cell differentiation in thymus	6	0.0196705	-1.70618	jak3, CABZ01066725.1, il7r, rpl22, ikzf1, jak1	2363	10	13373	3.3956	0.312555	0.303178
GOTERM_BP	GO:0048385~regulation of retinoic acid receptor signaling pathway	6	0.0196705	-1.70618	crabp2b, zic2b, tgif1, dhrs3a, aldh1a2, foxc1a	2363	10	13373	3.3956	0.312555	0.303178
GOTERM_BP	GO:0002761~regulation of myeloid leukocyte differentiation	6	0.0196705	-1.70618	irf8, tmem178, spi1a, runx1, tfe3a, spi1b	2363	10	13373	3.3956	0.312555	0.303178
GOTERM_BP	GO:0045088~regulation of innate immune response	14	0.0206812	-1.68442	trim25, tlr3, irak1, tmem173, irak3, socs1a, tlr21, tlr1, unc93b1, cntrl, socs1b, myd88, tlr22, cd40	2363	41	13373	1.93245	0.326551	0.316753
GOTERM_BP	GO:0006364~rRNA processing	34	0.0207903	-1.68214	ngdn, utp15, rps8a, eif6, imp4, tsr2, rpsa, ftsj3, rps7, si:dkey-251i10.3, rrp9, rpl35, nop58, rps14, snu13b, rsl1d1, gnl3, rps21, rpl7a, gar1, nsa2, rps16, dkc1, bms1, rpl10a, nop2, rps24, wdr3, rpl7, rps28, pop4, rps6, fbl, rrp36	2363	132	13373	1.45771	0.326551	0.316753
GOTERM_BP	GO:1902036~regulation of hematopoietic stem cell differentiation	5	0.02161	-1.66535	f2r, dnmt3bb.1, cdca7a, irf7, f11r.1	2363	7	13373	4.04238	0.337486	0.32736
GOTERM_BP	GO:0043067~regulation of programmed cell death	101	0.0218587	-1.66038	melk, fadd, adgrg1, nme8, inhbab, tnfrsf11a, rassf3, baxb, nod2, pak2a, gbp3, zgc:174906, tnfrsfa, nme2a, sgk2b, tradd, si:ch211-195b13.1, esco2, pmaip1, pim1, perp, casp8l2, fancd2, bnip4, socs3a, ctsh, caspa, zgc:153631, si:dkey-103e21.5, badb, tnfrsf1b, bida, ptk2ba, apaf1, si:dkey-10c21.1, tgfb1a, tgfb1b, tnfsf10l, aurkb, casp8, yap1, bmp7b, grinab, dlg5b.1, socs3b, g0s2, card11, gdf6b, bcl2l…	2363	469	13373	1.21875	0.33943	0.329246
GOTERM_BP	GO:1901991~negative regulation of mitotic cell cycle phase transition	12	0.0221327	-1.65496	dtl, mad2l1, fanci, bub1ba, ndc80, rb1, bub1, ccnd1, tp53, chek1, e2f7, bub1bb	2363	33	13373	2.05794	0.339825	0.329629
GOTERM_BP	GO:1901988~negative regulation of cell cycle phase transition	12	0.0221327	-1.65496	dtl, mad2l1, fanci, bub1ba, ndc80, rb1, bub1, ccnd1, tp53, chek1, e2f7, bub1bb	2363	33	13373	2.05794	0.339825	0.329629
GOTERM_BP	GO:0002274~myeloid leukocyte activation	10	0.0223901	-1.64994	sc:d189, zap70, ndrg1a, fpr1, p2ry12, batf, fes, cxcr3.2, cxcl18b, cxcl20	2363	25	13373	2.26373	0.341856	0.331599
GOTERM_BP	GO:0034645~cellular macromolecule biosynthetic process	539	0.023108	-1.63624	foxl2a, si:ch211-153b23.4, rps18, ucp2, nfatc4, foxj2, galnt12, rbl1, rplp2l, b3gnt2l, mcm6, pole, foxn4, e2f8, CU457819.1, rps14, egr3, eif3ha, slc25a48, rps21, irf5, dre-mir-212, mafbb, pcna, E2F2, pif1, notch1b, nfyal, rps2, pole2, rpl22l1, nr1d4a, sfrp1a, hivep1, her8.2, plagx, creb5b, tp53inp2, man2a1, lrrc1, notch2, jdp2b, cenpx, rps11, irak1, cry1bb, slc25a25a, uhrf1, sall3b, hlx1, rpl30, …	2363	2840	13373	1.07408	0.350857	0.34033
GOTERM_BP	GO:0045862~positive regulation of proteolysis	18	0.0234798	-1.62931	bida, psme1, prkn, rnf114, rnf19b, apaf1, ctsh, baxa, esco2, bmf1, trib3, pmaip1, psme2, baxb, tp53, pycard, trib2, si:ch211-212k18.15	2363	59	13373	1.72658	0.354532	0.343895
GOTERM_BP	GO:0010001~glial cell differentiation	20	0.0237484	-1.62436	irf8, cntf, prdm8, ndrg1a, adgrg1, gna13a, adgrg6, tuba8l3, slc7a7, arhgef10, gna12a, disc1, aldh1a2, egr2b, smo, csf1ra, erbb2, notch1a, nlrc3l, gna13b	2363	68	13373	1.66451	0.355123	0.344468
GOTERM_BP	GO:0002009~morphogenesis of an epithelium	91	0.0238841	-1.62189	fzd7b, zeb2b, npc1, pkp2, gna13a, ier2a, foxj1a, cenpf, sox4a, csrp1a, dvl2, rap1b, stm, atoh8, smad5, mmp14b, foxn4, fzd10, s1pr2, eaf2, sdc4, sox11a, fzd2, mmp14a, vangl2, lats2, ctnnb2, pfn1, disc1, ctsba, smo, mpp5a, ponzr1, sfrp1a, tfap2a, dcn, dhfr, chrd, arf6b, wnt3a, pdlim7, rhocb, ccdc40, dhrs9, lzts2a, ccdc103, nkd1, gna12a, aldh1a2, slc8a4a, lta4h, stat3, dsc2l, sox19b, cemip2, dnaaf1,…	2363	419	13373	1.22911	0.355123	0.344468
GOTERM_BP	GO:0007093~mitotic cell cycle checkpoint	15	0.0239088	-1.62144	mad2l1, dtl, fanci, ndc80, bub1ba, chfr, bub1, BX682558.1, zwilch, ccnd1, chek1, tp53, ttk, eme1, bub1bb	2363	46	13373	1.84543	0.355123	0.344468
GOTERM_BP	GO:0007264~small GTPase mediated signal transduction	102	0.0241068	-1.61786	gna13a, cdc42ep3, rhobtb1, arhgdia, BX323819.1, arhgef3l, si:dkey-163m14.2, arhgef2, rac1a, rock2bl, gpr4, arhgef33, obscnb, rrad, arhgap31, rab8b, cdc42l, arhgef39, rab27a, plce1, arf6b, si:dkey-34d22.5, plekhg4, rasa1b, gna12a, gpr18, gpr65, si:dkey-34d22.2, diras1b, RASGRP2, ascl1b, rac1b, net1, rock2b, rasd1, rergla, arhgef16, rab44, rhogd, dock8, rab20, arf1, arhgef18a, rab13, RASGRF1, rhov,…	2363	476	13373	1.21271	0.356129	0.345443
GOTERM_BP	GO:0042074~cell migration involved in gastrulation	23	0.0249753	-1.60249	zeb2b, lzts2a, mmp14a, itgb1b, apoc1, gna13a, vangl2, gna12a, gpc4, lpp, itgav, csrp1a, b4galt1, stat3, smad5, fzd7a, mmp14b, chrd, s1pr2, eaf2, def6a, rac1a, gna13b	2363	82	13373	1.58737	0.366966	0.355956
GOTERM_BP	GO:0048863~stem cell differentiation	17	0.0251467	-1.59952	ak2, cdca7a, irf7, batf, f11r.1, dlc, osr1, smo, f2r, fosl2, dld, dnmt3bb.1, fosab, rps29, etv2, cxcl8a, csf3a	2363	55	13373	1.74925	0.366966	0.355956
GOTERM_BP	GO:0030490~maturation of SSU-rRNA	14	0.0252432	-1.59786	ngdn, rps21, snu13b, rps8a, rps16, tsr2, bms1, rpsa, rps24, wdr3, si:dkey-251i10.3, rps28, rps14, rrp36	2363	42	13373	1.88644	0.366966	0.355956
GOTERM_BP	GO:0050830~defense response to Gram-positive bacterium	12	0.0276391	-1.55848	hist1h2a11, hist1h2a11, hist1h2a4, si:ch211-113a14.11, hist1h2a11, hist1h2a4, hist1h2a3, hist1h2a11, hist1h2a4, hist1h2a11, hist1h2a4, hist1h2a4	2363	34	13373	1.99741	0.39967	0.387678
GOTERM_BP	GO:0000470~maturation of LSU-rRNA	10	0.0290161	-1.53736	ftsj3, rsl1d1, snu13b, rpl7a, eif6, nsa2, rpl7, rpl35, rpl10a, nop2	2363	26	13373	2.17667	0.417374	0.404851
GOTERM_BP	GO:0016055~Wnt signaling pathway	49	0.0293924	-1.53176	fzd7b, ccdc88c, lypd6, tob1a, bambib, prdm5, trabd2b, csrp1a, dvl2, lrp5, fzd10, fzd6, fzd2, rgs3a, fermt2, vangl2, ctnnb2, wif1, tcf7l1b, smo, CABZ01086734.1, tcf7l1a, trabd2a, rab8b, wnt7aa, sfrp1a, wnt3a, wnt7bb, lzts2a, pygo1, nkd1, jun, wls, fam53b, sybu, dvl3a, jupa, tpbga, ptk7a, invs, iqgap1, rack1, btk, dkk2, rspo3, ugdh, fzd7a, dub, sfrp1b	2363	209	13373	1.32683	0.420573	0.407954
GOTERM_BP	GO:0000075~cell cycle checkpoint	19	0.0297139	-1.52704	mad2l1, dtl, fanci, ndc80, bub1ba, wdr76, chfr, bub1, si:ch73-352p4.5, rad1, BX682558.1, zwilch, aurkb, ccnd1, chek1, tp53, ttk, eme1, bub1bb	2363	65	13373	1.65427	0.422959	0.410268
GOTERM_BP	GO:0007088~regulation of mitotic nuclear division	14	0.0305046	-1.51563	mad2l1, gnl3, ndc80, bub1ba, espl1, bub1, fbxo5, cdca5, anapc10, bora, kif20bb, pmaip1, kif20ba, bub1bb	2363	43	13373	1.84257	0.424391	0.411658
GOTERM_BP	GO:0070371~ERK1 and ERK2 cascade	14	0.0305046	-1.51563	ccl44, ccl35.2, ccl34b.9, cxcl32b.1, ccl38.1, CABZ01041494.1, ccl34b.8, ccl19a.2, ccl19a.1, spry4, gpr183a, spry1, dusp6, ccl34b.1	2363	43	13373	1.84257	0.424391	0.411658
GOTERM_BP	GO:0030199~collagen fibril organization	6	0.0309015	-1.51002	loxl2b, serpinh1b, loxl2a, serpinh1a, mmp9, spint1a	2363	11	13373	3.08691	0.424391	0.411658
GOTERM_BP	GO:0006273~lagging strand elongation	6	0.0309015	-1.51002	dna2, rnaseh2a, fen1, parp2, lig1, pola1	2363	11	13373	3.08691	0.424391	0.411658
GOTERM_BP	GO:2000050~regulation of non-canonical Wnt signaling pathway	6	0.0309015	-1.51002	rgs3a, vangl2, prdm5, tpbga, ptk7a, rspo3	2363	11	13373	3.08691	0.424391	0.411658
GOTERM_BP	GO:0035329~hippo signaling	6	0.0309015	-1.51002	tead3a, lats2, tead1a, sav1, ajuba, tead3b	2363	11	13373	3.08691	0.424391	0.411658
GOTERM_BP	GO:0003406~retinal pigment epithelium development	6	0.0309015	-1.51002	nsfb, ctsd, yap1, wwtr1, atp6ap1b, otx1	2363	11	13373	3.08691	0.424391	0.411658
GOTERM_BP	GO:0030111~regulation of Wnt signaling pathway	29	0.031313	-1.50427	lzts2a, lypd6, bambib, nkd1, prdm5, trabd2b, lrp5, fam53b, sybu, dact3a, jupa, tpbga, ptk7a, eaf2, rgs3a, vangl2, wif1, rack1, btk, dkk2, rspo3, CABZ01086734.1, tcf7l1a, rab8b, tax1bp3, trabd2a, ugdh, sfrp1a, plpp3	2363	112	13373	1.46536	0.427893	0.415054
GOTERM_BP	GO:0198738~cell-cell signaling by wnt	49	0.0317689	-1.498	fzd7b, ccdc88c, lypd6, tob1a, bambib, prdm5, trabd2b, csrp1a, dvl2, lrp5, fzd10, fzd6, fzd2, rgs3a, fermt2, vangl2, ctnnb2, wif1, tcf7l1b, smo, CABZ01086734.1, tcf7l1a, trabd2a, rab8b, wnt7aa, sfrp1a, wnt3a, wnt7bb, lzts2a, pygo1, nkd1, jun, wls, fam53b, sybu, dvl3a, jupa, tpbga, ptk7a, invs, iqgap1, rack1, btk, dkk2, rspo3, ugdh, fzd7a, dub, sfrp1b	2363	210	13373	1.32051	0.431962	0.419002
GOTERM_BP	GO:0001946~lymphangiogenesis	13	0.0323204	-1.49052	pkd1a, lpar1, arap3, notch2, mafba, e2f7, stab1, notch1b, stab2, zap70, vcam1b, pkd2, e2f8	2363	39	13373	1.88644	0.437285	0.424165
GOTERM_BP	GO:0010948~negative regulation of cell cycle process	15	0.0341124	-1.46709	mad2l1, dtl, fanci, ndc80, bub1ba, bub1, fbxo5, e2f7, e2f8, rb1, aurkb, ccnd1, chek1, tp53, bub1bb	2363	48	13373	1.76854	0.459257	0.445478
GOTERM_BP	GO:0001945~lymph vessel development	17	0.0346275	-1.46058	junba, foxo1a, pkd1a, lpar1, arap3, notch2, mafba, e2f7, stab1, notch1b, stab2, zap70, vcam1b, smad5, mmp2, pkd2, e2f8	2363	57	13373	1.68787	0.463907	0.449988
GOTERM_BP	GO:0002687~positive regulation of leukocyte migration	7	0.0354958	-1.44982	cxcl11.6, csf1ra, pgfb, cxcl11.5, rac2, cxcl18b, cxcl20	2363	15	13373	2.64102	0.472856	0.458669
GOTERM_BP	GO:0097191~extrinsic apoptotic signaling pathway	11	0.0356415	-1.44804	baxa, casp8l2, tnfrsf1b, cflara, g0s2, bcl2a, tnfsf10l, casp8, baxb, si:dkey-103e21.5, zgc:194469	2363	31	13373	2.00815	0.472856	0.458669
GOTERM_BP	GO:0009887~organ morphogenesis	132	0.0364954	-1.43776	pdgfra, pkp2, foxj1a, cenpf, macc1, atp6ap1b, sox4a, fn1b, dvl2, lrp5, atoh8, fgf24, foxn4, fzd6, thy1, etv2, fzd2, dcdc2b, disc1, ttc25, smo, hsp70.3, loxl3b, sfrp1a, itga5, ccnd1, egr1, chrd, pim1, ttn.1, dhrs9, notch2, ccdc103, nek2, crb2a, wls, socs3a, stat3, jag1b, pmm2, pls3, pdgfrb, cemip2, gfpt1, mfap2, pkd2, caspa, atp1b2b, pkn2, rbck1, lama1, sox3, invs, adgrg6, ahsa1a, poc1b, cdipt, so…	2363	642	13373	1.1636	0.481846	0.467389
GOTERM_BP	GO:0071897~DNA biosynthetic process	10	0.0368996	-1.43298	primpol, dtl, pole2, haus3, poln, tk1, pcna, pif1, lig1, tert	2363	27	13373	2.09605	0.48484	0.470293
GOTERM_BP	GO:0085029~extracellular matrix assembly	5	0.0372499	-1.42888	mibp2, cemip2, has1, itga5, lamb2	2363	8	13373	3.53708	0.4871	0.472485
GOTERM_BP	GO:0051495~positive regulation of cytoskeleton organization	20	0.0414831	-1.38213	rock2b, arpc5b, arfip1, rock2bl, cdc42ep3, wipf2a, pfn1, fmn2a, arpc5a, nes, plk4, arpc4, wipf1b, actr3b, wasa, arpc1b, wasb, cdc42ep2, cdc42ep5, baiap2b	2363	72	13373	1.57204	0.527568	0.511739
GOTERM_BP	GO:0051782~negative regulation of cell division	4	0.0415028	-1.38192	e2f8, aurkb, tp53, e2f7	2363	5	13373	4.52747	0.527568	0.511739
GOTERM_BP	GO:0014004~microglia differentiation	4	0.0415028	-1.38192	irf8, csf1ra, slc7a7, nlrc3l	2363	5	13373	4.52747	0.527568	0.511739
GOTERM_BP	GO:0051591~response to cAMP	4	0.0415028	-1.38192	junba, jund, jun, june	2363	5	13373	4.52747	0.527568	0.511739
GOTERM_BP	GO:0033567~DNA replication, Okazaki fragment processing	4	0.0415028	-1.38192	dna2, rnaseh2a, fen1, lig1	2363	5	13373	4.52747	0.527568	0.511739
GOTERM_BP	GO:1902969~mitotic DNA replication	4	0.0415028	-1.38192	cdc45, gins1, lig1, gins2	2363	5	13373	4.52747	0.527568	0.511739
GOTERM_BP	GO:0030903~notochord development	18	0.0428129	-1.36843	col2a1a, vangl2, rab32a, lama4, fas, gpc4, b4galt1, egfl6, hps5, dla, lamb1a, slc2a10, lamc1, faslg, wnt3a, igf2a, fstl1a, lama1	2363	63	13373	1.61695	0.541702	0.525449
GOTERM_BP	GO:0051783~regulation of nuclear division	14	0.0433262	-1.36325	mad2l1, gnl3, ndc80, bub1ba, espl1, bub1, fbxo5, cdca5, anapc10, bora, kif20bb, pmaip1, kif20ba, bub1bb	2363	45	13373	1.76068	0.545671	0.529299
GOTERM_BP	GO:0048885~neuromast deposition	6	0.045437	-1.34259	tgfb1a, smad5, aldh1l1, rtn4rl2a, tnfrsf19, ngfrb	2363	12	13373	2.82967	0.567029	0.550016
GOTERM_BP	GO:0051092~positive regulation of NF-kappaB transcription factor activity	6	0.045437	-1.34259	traf1, malt1, card11, irak1, irak3, bcl10	2363	12	13373	2.82967	0.567029	0.550016
GOTERM_BP	GO:0009968~negative regulation of signal transduction	58	0.0468433	-1.32935	ptbp1a, lrtm1, socs3b, bambib, ajuba, nme8, trabd2b, sox4a, spry4, errfi1a, spry1, LRRC4C (1 of many), socs1b, sox11a, flrt1b, cflara, rgs3a, rtn4rl2a, wif1, cerkl, tcf7l1a, trabd2a, dcn, chrd, ldb2a, inppl1a, lzts2a, ada, nkd1, rasa1b, crb2a, irak3, socs3a, hhip, skilb, rtn4rl2b, tp53bp2a, rasal3, jupa, rfx4, tpbga, ptk7a, rest, il17rd, sox4b, cdon, rack1, rtn4r, foxc1a, btk, dkk2, rspo3, socs1a…	2363	261	13373	1.25763	0.581922	0.564462
GOTERM_BP	GO:1903046~meiotic cell cycle process	20	0.04712	-1.3268	rad51d, pttg1, espl1, trip13, cenps, cenpx, fbxo5, si:dkey-57a22.11, sgo1, mnd1, bcl2l11, rad51b, aurka, ncapd3, rad51, dsn1, ttk, eme1, msh6, si:ch211-199g17.9	2363	73	13373	1.5505	0.58271	0.565226
GOTERM_BP	GO:0034612~response to tumor necrosis factor	9	0.0479387	-1.31931	ccl44, ccl19a.2, ccl19a.1, ccl34b.9, ccl35.2, cxcl32b.1, ccl38.1, ccl34b.1, ccl34b.8	2363	24	13373	2.12225	0.590165	0.572457
GOTERM_BP	GO:0045879~negative regulation of smoothened signaling pathway	7	0.0485336	-1.31396	hhip, sox11a, sox4b, cdon, rfx4, sox4a, rest	2363	16	13373	2.47596	0.592153	0.574387
GOTERM_BP	GO:0034508~centromere complex assembly	7	0.0485336	-1.31396	cenpx, cenpi, mis12, mis18a, cenpn, si:dkey-148h10.5, cenph	2363	16	13373	2.47596	0.592153	0.574387
GOTERM_BP	GO:0022408~negative regulation of cell-cell adhesion	8	0.0489601	-1.31016	f2r, ifng1, gna13a, tnfaip8l2b, runx1, gna12a, cxcl8a, tnfaip8l2a	2363	20	13373	2.26373	0.594702	0.576859
GOTERM_BP	GO:0048562~embryonic organ morphogenesis	77	0.0498485	-1.30235	gli2a, pdgfra, pkp2, aldh1l1, foxj1a, prdm5, cenpf, macc1, sox4a, lrp5, stm, atoh8, smad5, eif3ea, lamb1a, foxn4, fzd6, s1pr2, sox11a, fzd2, mmp14a, dcdc2b, vangl2, disc1, b4galt1, ttc25, smo, tcf7l1a, loxl3b, ponzr1, sfrp1a, tfap2a, dhfr, itga5, egr1, chrd, pdlim7, ccdc40, dhrs9, ccdc103, nkd1, aldh1a2, wls, slc8a4a, jag1b, pmm2, zic2b, pdgfrb, pls3, cemip2, mfap2, dnaaf1, gfpt1, pkd2, caspa, at…	2363	360	13373	1.21047	0.602813	0.584727
GOTERM_BP	GO:0016310~phosphorylation	246	0.0508773	-1.29348	melk, mertka, adgrg1, prkcdb, camk2d2, pkn3, cks1b, inhbab, pacsin2, CABZ01041494.1, tie1, ccl34b.8, sh3bp5la, mob3c, snrkb, fes, hk2, stk38b, csf1rb, gucy2d, ephb4b, ulk2, tnfrsfa, nme2a, plk4, map3k21, mapk15, eno1b, map3k8, wnk2, pim1, pkn1a, pak6b, mob1a, ttn.1, chek2, camk2d1, akt1, irak1, tnfrsf19, cdk1, ccl19a.2, rtn4rl2b, acvrl1, dclk1a, phkg1a, khk, cks2, limk1b, il34, anapc10, cdk15, tg…	2363	1263	13373	1.10229	0.611035	0.592702
GOTERM_BP	GO:0007224~smoothened signaling pathway	14	0.0509755	-1.29264	sox11a, gli2a, boc, sox4b, cdon, stil, sox4a, smo, hhip, ugdh, robo4, rfx4, stk36, rest	2363	46	13373	1.72241	0.611035	0.592702
GOTERM_BP	GO:0051271~negative regulation of cellular component movement	19	0.0513045	-1.28984	aldh1l1, rtn4rl2a, sema6d, cxcr4b, sema3fb, tnfrsf19, inpp5d, srgap2, tgfb1a, smad5, sema3e, srgap1a, sema3fa, sinhcaf, s1pr2, sema3gb, thy1, inppl1a, ngfrb	2363	69	13373	1.55837	0.612293	0.593922
GOTERM_BP	GO:0010648~negative regulation of cell communication	59	0.0526837	-1.27832	ptbp1a, lrtm1, socs3b, bambib, ajuba, nme8, trabd2b, sox4a, spry4, errfi1a, spry1, LRRC4C (1 of many), socs1b, sox11a, flrt1b, cflara, rgs3a, rtn4rl2a, wif1, drd2b, cerkl, tcf7l1a, trabd2a, dcn, chrd, ldb2a, inppl1a, lzts2a, ada, nkd1, rasa1b, crb2a, irak3, socs3a, hhip, skilb, rtn4rl2b, tp53bp2a, rasal3, jupa, rfx4, tpbga, ptk7a, rest, il17rd, sox4b, cdon, rack1, rtn4r, foxc1a, btk, dkk2, rspo3,…	2363	268	13373	1.2459	0.62602	0.607237
GOTERM_BP	GO:0002764~immune response-regulating signaling pathway	24	0.0530751	-1.27511	cd79b, trim25, CU861476.1, klhl6, si:ch211-243a20.4, tespa1, tlr3, irak1, tmem173, kitb, irak3, CABZ01041494.1, tlr21, zap70, fpr1, si:ch211-214p13.9, tlr1, skap2, rftn1a, thy1, unc93b1, cntrl, myd88, cd40	2363	93	13373	1.46047	0.626184	0.607396
GOTERM_BP	GO:0034622~cellular macromolecular complex assembly	105	0.0531901	-1.27417	cdc42ep3, wipf2a, snap23.2, zgc:173585, CU459186.3, rad51, arpc1b, bxdc2, si:dkey-23a13.17, zgc:163061, rps14, eif3ha, si:dkey-108k21.21, rpl24, zgc:153405, si:ch73-368j24.11, psmd4b, si:ch211-113a14.12, fmn2a, FP236812.1, si:ch211-113a14.24, si:dkey-23a13.9, tcirg1b, ttn.1, ccdc103, cenpx, CU457819.5, daw1, wipf1b, tppp3, wasb, msrb2, snap23.1, rad51d, CU459186.2, cenpn, arpc5a, ptk2ba, rpl38, a…	2363	508	13373	1.16974	0.626184	0.607396
GOTERM_BP	GO:0048468~cell development	222	0.0533849	-1.27258	ppp1r9alb, melk, adgrg1, trip13, mvp, boc, myh7ba, slc43a1a, inhbab, sema3fb, e2f8, tnnt3b, alcamb, rps14, csf3a, gap43, dcdc2b, ulk2, obscnb, cntn1b, smo, notch1b, mmp2, runx1, grhl1, ttn.1, dhrs9, myoz1a, lgals2a, pygo1, akt1, nfkb1, cyfip1, gna12a, sema6d, tnfrsf19, jag1b, gfpt1, rb1, stmn3, sema3gb, hdc, her9, adgrg6, slc7a7, gpc4, rtn4r, gfi1ab, foxc1a, egr2b, gmppb, tgfb1a, eif3ba, tgfb1b, …	2363	1135	13373	1.10694	0.626184	0.607396
GOTERM_BP	GO:0060027~convergent extension involved in gastrulation	21	0.0550137	-1.25953	fzd2, fzd7b, zeb2b, invs, mmp14a, lats2, vangl2, pfn1, gpc4, rack1, disc1, lpp, csrp1a, dsc2l, smad5, fzd7a, dnaaf1, mmp14b, chrd, s1pr2, def6a	2363	79	13373	1.50438	0.640682	0.621459
GOTERM_BP	GO:0006414~translational elongation	13	0.0550898	-1.25893	eef1g, si:ch211-153b23.4, eef1da, rplp1, eef1b2, eef1a1l1, eif5a2, rplp2l, eef1db, rplp2, rps9, eef2b, eef2a.1	2363	42	13373	1.7517	0.640682	0.621459
GOTERM_BP	GO:0045930~negative regulation of mitotic cell cycle	18	0.0558933	-1.25264	mad2l1, dtl, fanci, ndc80, bub1ba, chfr, bub1, fbxo5, e2f7, BX682558.1, zwilch, rb1, ccnd1, chek1, tp53, ttk, eme1, bub1bb	2363	65	13373	1.5672	0.647273	0.627852
GOTERM_BP	GO:0009620~response to fungus	10	0.0567684	-1.24589	jagn1b, orc1, nsdhl, hspa5, cyp51, sc5d, mcm4, ncf1, cebpb, dgat1b	2363	29	13373	1.95149	0.654633	0.634992
GOTERM_BP	GO:0051246~regulation of protein metabolic process	140	0.0577853	-1.23818	tfpia, si:ch211-153b23.4, tpx2, psme1, ccl35.2, ajuba, cks1b, inhbab, tnfrsf11a, eif5a2, CABZ01041494.1, mov10b.2, ccl34b.8, sh3bp5la, dusp22b, spry4, baxb, rgcc, thy1, trib2, LRRC4C (1 of many), si:ch211-212k18.15, pak2a, eif3ha, rtn4rl2a, dre-mir-212, ccl38.1, tnfrsfa, zfp36l2, esco2, ccl19a.1, pmaip1, dre-mir-181b-1, rplp1, zfp36l1a, znf385a, cart2, tnfrsf19, socs3a, itm2bb, ctsh, ccl19a.2, rt…	2363	696	13373	1.13837	0.656033	0.63635
GOTERM_BP	GO:0060729~intestinal epithelial structure maintenance	5	0.0578587	-1.23763	uhrf1, ptbp1a, cdipt, tp53, tert	2363	9	13373	3.14407	0.656033	0.63635
GOTERM_BP	GO:0030277~maintenance of gastrointestinal epithelium	5	0.0578587	-1.23763	uhrf1, ptbp1a, cdipt, tp53, tert	2363	9	13373	3.14407	0.656033	0.63635
GOTERM_BP	GO:0001666~response to hypoxia	16	0.05809	-1.2359	npc1, loxl2b, mmp14a, loxl2a, ajuba, ngb, pgfb, hmox1a, lipf, cct4, irs2a, hspa5, hsp90b1, tp53, ddit3, sdcbp2	2363	56	13373	1.61695	0.656033	0.63635
GOTERM_BP	GO:0072073~kidney epithelium development	16	0.05809	-1.2359	anln, shroom3, slc43a1a, aldh1a2, foxc1a, apol1, osr1, iqgap2, wt1b, ponzr1, pkd2, crb2b, yap1, myh9a, etv5a, etv4	2363	56	13373	1.61695	0.656033	0.63635
GOTERM_BP	GO:0010563~negative regulation of phosphorus metabolic process	25	0.0599329	-1.22233	adra2db, socs3b, lrtm1, irak3, socs3a, sh3bp5la, rtn4rl2b, spry4, spry1, thy1, LRRC4C (1 of many), socs1b, mrap2a, flrt1b, il17rd, rtn4rl2a, mastl, drd2b, prkn, anapc10, ppp1r35, socs1a, dcn, pik3ip1, dusp6	2363	99	13373	1.42912	0.671298	0.651157
GOTERM_BP	GO:0045936~negative regulation of phosphate metabolic process	25	0.0599329	-1.22233	adra2db, socs3b, lrtm1, irak3, socs3a, sh3bp5la, rtn4rl2b, spry4, spry1, thy1, LRRC4C (1 of many), socs1b, mrap2a, flrt1b, il17rd, rtn4rl2a, mastl, drd2b, prkn, anapc10, ppp1r35, socs1a, dcn, pik3ip1, dusp6	2363	99	13373	1.42912	0.671298	0.651157
GOTERM_BP	GO:0007369~gastrulation	54	0.0620394	-1.20733	fzd7b, zeb2b, npc1, gna13a, aldh1l1, dusp2, dusp4, csrp1a, fgf24, smad5, snrkb, mmp14b, s1pr2, eaf2, sdc4, etv2, rac1a, fzd2, mmp14a, vangl2, lats2, pfn1, disc1, itgav, b4galt1, chrd, arf6b, lzts2a, gna12a, crb2a, lta4h, osr1, stat3, dsc2l, sox19b, dnaaf1, etv5a, dusp5, sdcbp2, invs, lpar1, itgb1b, apoc1, gpc4, rack1, lpp, fzd7a, crb2b, ltb4r, notch1a, rhov, def6a, dusp6, gna13b	2363	245	13373	1.24736	0.692056	0.671292
GOTERM_BP	GO:0034308~primary alcohol metabolic process	6	0.063394	-1.19795	dhrs9, adh8b, cyp1b1, dhrs3a, aldh1a2, adh5	2363	13	13373	2.612	0.695806	0.674929
GOTERM_BP	GO:0019885~antigen processing and presentation of endogenous peptide antigen via MHC class I	6	0.063394	-1.19795	tapbp.2, erap1b, tap1, tapbp.1, tap2t, erap2	2363	13	13373	2.612	0.695806	0.674929
GOTERM_BP	GO:0021986~habenula development	6	0.063394	-1.19795	ulk2, kctd12.2, kctd12.1, notch1a, wls, sec61a1	2363	13	13373	2.612	0.695806	0.674929
GOTERM_BP	GO:0042541~hemoglobin biosynthetic process	6	0.063394	-1.19795	cpox, rpl11, tfa, slc25a38a, tfr1b, rps19	2363	13	13373	2.612	0.695806	0.674929
GOTERM_BP	GO:0002062~chondrocyte differentiation	7	0.0641526	-1.19279	pmm2, loxl2b, loxl2a, gfpt1, creb3l2, runx1, runx3	2363	17	13373	2.33031	0.696463	0.675566
GOTERM_BP	GO:0001819~positive regulation of cytokine production	7	0.0641526	-1.19279	trim25, ticam1, tlr1, si:ch211-243a20.4, tlr3, tmem173, zbtb16b	2363	17	13373	2.33031	0.696463	0.675566
GOTERM_BP	GO:0022008~neurogenesis	172	0.0642183	-1.19234	loxa, ppp1r9alb, gna13a, adgrg1, mvp, boc, sema3fb, slbp, kif26ba, foxn4, e2f8, sema3fa, thy1, alcamb, LRRC4C (1 of many), gap43, dcdc2b, ulk2, cntn1b, etv5b, snx5, disc1, sgk2b, hgfb, notch1b, smo, si:ch211-195b13.1, sema3e, mmp2, cntn3a.1, manf, map4l, runx1, wnt3a, wnt7bb, id3, kif26bb, lgals2a, il6st, asah1b, nek2, akt1, tuba8l3, nfkb1, gna12a, cyfip1, sema6d, socs3a, lgmn, stat3, jag1b, pmm2…	2363	871	13373	1.11757	0.696463	0.675566
GOTERM_BP	GO:0055113~epiboly involved in gastrulation with mouth forming second	13	0.0646066	-1.18972	npc1, gna13a, pfn1, gna12a, lta4h, dsc2l, sox19b, ltb4r, arf6b, rhov, sdc4, gna13b, sdcbp2	2363	43	13373	1.71096	0.697904	0.676965
GOTERM_BP	GO:0061515~myeloid cell development	16	0.0664695	-1.17738	npc1, irf8, melk, slc7a7, fech, spi1b, tert, etv7, rpl11, csf1ra, rps29, tp53, nlrc3l, rps14, rps19, csf3a	2363	57	13373	1.58858	0.715201	0.693742
GOTERM_BP	GO:0048705~skeletal system morphogenesis	37	0.0686633	-1.16328	dhrs9, notch2, pdgfra, aldh1l1, prdm5, aldh1a2, wls, macc1, lrp5, rap1b, jag1b, pmm2, zic2b, pdgfrb, pls3, eif3ea, gfpt1, caspa, s1pr2, fzd6, pkn2, rbck1, inka1a, mmp14a, ahsa1a, disc1, mkxa, smo, sec24d, loxl3b, ponzr1, tfap2a, itga5, egr1, plcb3, edn1, runx3	2363	160	13373	1.30872	0.732401	0.710426
GOTERM_BP	GO:0002262~myeloid cell homeostasis	21	0.0687944	-1.16245	rps27.1, melk, fech, rplp1, casp3b, piezo1, spi1b, rac2, tert, rpl27, etv7, rpl11, rps29, tp53, rpl35, rps3, casp3a, rpl35a, slc25a38a, rps14, rps19	2363	81	13373	1.46723	0.732401	0.710426
GOTERM_BP	GO:0006220~pyrimidine nucleotide metabolic process	10	0.0688719	-1.16196	uckl1a, dctd, nme2b.1, tyms, dtymk, nme8, nme2a, umps, ctps1a, ctps1b	2363	30	13373	1.88644	0.732401	0.710426
GOTERM_BP	GO:0003401~axis elongation	12	0.0701324	-1.15408	tax1bp3, zeb2b, stk25a, vangl2, itga5, dcn, dvl3a, gpc4, ptk7a, eaf2, itgav, dvl2	2363	39	13373	1.74133	0.742914	0.720624
GOTERM_BP	GO:0045934~negative regulation of nucleobase-containing compound metabolic process	64	0.0709173	-1.14925	junba, h2afx, nr0b2a, e2f7, nfkb2, bhlhe40, her2, id1, nab1a, e2f8, sox21b, bhlhe41, si:ch211-132b12.7, CU457819.1, hist1h2a10, hist1h2a4, loxl2b, cry-dash, drd2b, pif1, cipca, hist1h2a11, cry4, ccnd1, jund, brms1lb, hist1h2a4, si:ch211-113a14.11, hes6, hist1h2a4, zgc:154164, msh6, id3, parpbp, adra2db, homeza, jun, lrrc14b, rel, june, cry1bb, nab2, osr1, nab1b, uhrf1, skilb, hist1h2a11, rb1, tp5…	2363	299	13373	1.21136	0.745099	0.722743
GOTERM_BP	GO:0002757~immune response-activating signal transduction	23	0.0711754	-1.14767	cd79b, trim25, CU861476.1, klhl6, si:ch211-243a20.4, tespa1, tlr3, irak1, tmem173, irak3, CABZ01041494.1, tlr21, zap70, fpr1, si:ch211-214p13.9, tlr1, skap2, rftn1a, thy1, unc93b1, cntrl, myd88, cd40	2363	91	13373	1.43038	0.745099	0.722743
GOTERM_BP	GO:0051348~negative regulation of transferase activity	18	0.0715115	-1.14562	flrt1b, socs3b, lrtm1, rtn4rl2a, il17rd, fbxo5, pif1, irak3, socs3a, anapc10, sh3bp5la, socs1a, rtn4rl2b, dcn, thy1, LRRC4C (1 of many), pik3ip1, socs1b	2363	67	13373	1.52042	0.745099	0.722743
GOTERM_BP	GO:1902679~negative regulation of RNA biosynthetic process	57	0.0721724	-1.14163	junba, h2afx, nr0b2a, e2f7, nfkb2, bhlhe40, her2, id1, nab1a, e2f8, sox21b, bhlhe41, si:ch211-132b12.7, CU457819.1, hist1h2a10, hist1h2a4, loxl2b, cry-dash, cipca, hist1h2a11, cry4, ccnd1, jund, brms1lb, hist1h2a4, si:ch211-113a14.11, hes6, hist1h2a4, zgc:154164, id3, homeza, jun, lrrc14b, rel, june, cry1bb, nab2, osr1, nab1b, uhrf1, skilb, hist1h2a11, rb1, tp53, bcl6ab, loxl2a, cdc45, gfi1ab, mk…	2363	263	13373	1.22655	0.745099	0.722743
GOTERM_BP	GO:0045892~negative regulation of transcription, DNA-templated	57	0.0721724	-1.14163	junba, h2afx, nr0b2a, e2f7, nfkb2, bhlhe40, her2, id1, nab1a, e2f8, sox21b, bhlhe41, si:ch211-132b12.7, CU457819.1, hist1h2a10, hist1h2a4, loxl2b, cry-dash, cipca, hist1h2a11, cry4, ccnd1, jund, brms1lb, hist1h2a4, si:ch211-113a14.11, hes6, hist1h2a4, zgc:154164, id3, homeza, jun, lrrc14b, rel, june, cry1bb, nab2, osr1, nab1b, uhrf1, skilb, hist1h2a11, rb1, tp53, bcl6ab, loxl2a, cdc45, gfi1ab, mk…	2363	263	13373	1.22655	0.745099	0.722743
GOTERM_BP	GO:0032365~intracellular lipid transport	4	0.072247	-1.14118	npc2, ldlra, NPC2 (1 of many), col4a3bpa	2363	6	13373	3.77289	0.745099	0.722743
GOTERM_BP	GO:0071379~cellular response to prostaglandin stimulus	4	0.072247	-1.14118	ptgir, keap1a, ptger2a, nfe2l2a	2363	6	13373	3.77289	0.745099	0.722743
GOTERM_BP	GO:0000902~cell morphogenesis	136	0.0736317	-1.13293	zeb2b, gna13a, cdc42ep3, wipf2a, boc, ier2a, foxj1a, sema3fb, atp6ap1b, slbp, kif26ba, si:ch211-163l21.10, ehd1b, e2f8, sema3fa, wdr35, thy1, alcamb, LRRC4C (1 of many), fzd2, loxl2b, ulk2, etv5b, sgk2b, ttc25, notch1b, smo, si:ch211-195b13.1, sema3e, mmp2, cntn3a.1, itga5, runx1, tagln2, ifng1, myh9b, kif26bb, asah1b, ccdc103, daw1, gna12a, ttll6, cyfip1, sema6d, stat3, wipf1b, pmm2, pls3, prrx1…	2363	681	13373	1.1302	0.756525	0.733826
GOTERM_BP	GO:0051216~cartilage development	29	0.0745112	-1.12778	fgfrl1a, loxa, notch2, rap1b, jag1b, acvr2aa, pmm2, creb3l2, mmp14b, gfpt1, nsd2, loxl2b, inka1a, mmp14a, loxl2a, sparc, gpc4, disc1, smo, sec24d, tfap2a, dcn, runx1, ctsk, plcb3, edn1, yap1, runx3, ednraa	2363	121	13373	1.35637	0.76154	0.738691
GOTERM_BP	GO:0030162~regulation of proteolysis	30	0.0746772	-1.12681	tfpia, psme1, rnf19b, ctsh, rhbdf1a, bmf1, baxb, tp53, trib2, si:ch211-212k18.15, pak2a, tnfrsf1b, zgc:163030, bida, si:busm1-57f23.1, prkn, birc7, rnf114, cenph, btbd6a, apaf1, baxa, esco2, bcl2a, pmaip1, trib3, casp8, psme2, edn1, pycard	2363	126	13373	1.34746	0.76154	0.738691
GOTERM_BP	GO:0032268~regulation of cellular protein metabolic process	131	0.0750777	-1.12449	tfpia, si:ch211-153b23.4, tpx2, psme1, ccl35.2, ajuba, cks1b, inhbab, tnfrsf11a, eif5a2, CABZ01041494.1, mov10b.2, ccl34b.8, sh3bp5la, dusp22b, spry4, baxb, rgcc, thy1, trib2, LRRC4C (1 of many), si:ch211-212k18.15, pak2a, eif3ha, rtn4rl2a, dre-mir-212, ccl38.1, tnfrsfa, zfp36l2, esco2, ccl19a.1, pmaip1, dre-mir-181b-1, rplp1, zfp36l1a, znf385a, cart2, tnfrsf19, socs3a, ctsh, ccl19a.2, rtn4rl2b, …	2363	655	13373	1.13187	0.762779	0.739893
GOTERM_BP	GO:0010604~positive regulation of macromolecule metabolic process	119	0.0757037	-1.12088	tpx2, psme1, ccl35.2, cks1b, inhbab, tnfrsf11a, eif5a2, CABZ01041494.1, ccl34b.8, dusp22b, creb3l2, foxn4, e2f8, baxb, rgcc, trib2, si:ch211-212k18.15, top2a, ccl38.1, tnfrsfa, esco2, ccl19a.1, pmaip1, runx1, egr1, tp53inp2, nfe2l1a, npas4a, jun, rplp1, cart2, tnfrsf19, ctsh, irak4, ccl19a.2, zgc:153631, tnfrsf1b, cks2, bida, ccl34b.9, cxcl32b.1, si:dkey-17m8.1, il34, rnf114, ppargc1a, apaf1, nfe…	2363	591	13373	1.13953	0.76629	0.743299
GOTERM_BP	GO:0002040~sprouting angiogenesis	21	0.0764969	-1.11636	gas6, loxl2b, lgals2a, loxl2a, abca1a, arhgef9b, e2f7, dre-mir-221, rspo3, tnfrsf19, rnf213a, zap70, sema3e, eif3i, ano6, itga5, e2f8, fmnl3, hlx1, igfbp7, etv2	2363	82	13373	1.44934	0.771461	0.748314
GOTERM_BP	GO:0051056~regulation of small GTPase mediated signal transduction	40	0.0782556	-1.10648	quo, arhgef40, ngef, arhgef15, plekhg4, arhgef10, rasa1b, si:ch1073-90m23.1, ect2, si:dkey-172h23.2, gpr18, fgd4b, mcf2a, gpr65, BX323819.1, si:dkey-33c9.6, f2r, arhgef3l, lpar6a, rasal3, cyth4b, plekhg2, spry1, net1, si:dkey-163m14.2, arhgef2, arhgef16, obscnb, arhgef33, gpr4, arhgef9b, spata13, rasgrf2b, gpr55a, chn1, arhgef18a, arhgef39, robo4, RASGRF1, farp2	2363	177	13373	1.27894	0.786296	0.762704
GOTERM_BP	GO:0051253~negative regulation of RNA metabolic process	58	0.0799381	-1.09725	junba, h2afx, nr0b2a, e2f7, nfkb2, bhlhe40, her2, id1, nab1a, e2f8, sox21b, bhlhe41, si:ch211-132b12.7, CU457819.1, hist1h2a10, hist1h2a4, loxl2b, cry-dash, cipca, hist1h2a11, cry4, ccnd1, jund, brms1lb, hist1h2a4, si:ch211-113a14.11, hes6, hist1h2a4, zgc:154164, id3, homeza, jun, lrrc14b, rel, june, cry1bb, nab2, osr1, nab1b, uhrf1, skilb, hist1h2a11, rb1, tp53, bcl6ab, ybx1, loxl2a, cdc45, gfi1…	2363	270	13373	1.21571	0.80026	0.776249
GOTERM_BP	GO:0051345~positive regulation of hydrolase activity	34	0.0805294	-1.09405	ccl44, psme1, evi5a, ccl35.2, rasa1b, ctsh, ccl34b.8, si:dkey-33c9.6, si:ch211-266k8.4, srgap2, ccl19a.2, si:dkey-191g9.5, bmf1, baxb, tp53, ccl34b.1, bida, ccl34b.9, ccl38.1, cxcl32b.1, myo9b, sgsm2, apaf1, chn1, baxa, esco2, ccl19a.1, pmaip1, psme2, tbc1d2, pycard, tbc1d1, si:dkeyp-19e1.3, gna13b	2363	147	13373	1.30896	0.802856	0.778767
GOTERM_BP	GO:0006275~regulation of DNA replication	7	0.0823764	-1.0842	esco2, dna2, dscc1, pdgfba, e2f8, pcna, e2f7	2363	18	13373	2.20085	0.802856	0.778767
GOTERM_BP	GO:0050921~positive regulation of chemotaxis	7	0.0823764	-1.0842	cxcl11.6, csf1ra, pgfb, cxcl11.5, cxcr4b, cxcl18b, cxcl20	2363	18	13373	2.20085	0.802856	0.778767
GOTERM_BP	GO:1901533~negative regulation of hematopoietic progenitor cell differentiation	3	0.0825475	-1.0833	f2r, nfkbiaa, irf7	2363	3	13373	5.65933	0.802856	0.778767
GOTERM_BP	GO:0060079~excitatory postsynaptic potential	3	0.0825475	-1.0833	CR388166.1, npas4a, npffl	2363	3	13373	5.65933	0.802856	0.778767
GOTERM_BP	GO:0014005~microglia development	3	0.0825475	-1.0833	irf8, slc7a7, nlrc3l	2363	3	13373	5.65933	0.802856	0.778767
GOTERM_BP	GO:0071139~resolution of recombination intermediates	3	0.0825475	-1.0833	smc5, si:dkey-119f1.1, smc6	2363	3	13373	5.65933	0.802856	0.778767
GOTERM_BP	GO:0006564~L-serine biosynthetic process	3	0.0825475	-1.0833	phgdh, psph, psat1	2363	3	13373	5.65933	0.802856	0.778767
GOTERM_BP	GO:0045445~myoblast differentiation	5	0.0833174	-1.07926	fosl2, boc, robo4, cdon, mkxa	2363	10	13373	2.82967	0.80747	0.783243
GOTERM_BP	GO:0020027~hemoglobin metabolic process	6	0.0847558	-1.07183	cpox, rpl11, tfa, slc25a38a, tfr1b, rps19	2363	14	13373	2.42543	0.809922	0.785621
GOTERM_BP	GO:0061386~closure of optic fissure	6	0.0847558	-1.07183	sox11a, phactr4a, sfrp1a, sox4b, foxc1a, sox4a	2363	14	13373	2.42543	0.809922	0.785621
GOTERM_BP	GO:0002690~positive regulation of leukocyte chemotaxis	6	0.0847558	-1.07183	cxcl11.6, csf1ra, pgfb, cxcl11.5, cxcl18b, cxcl20	2363	14	13373	2.42543	0.809922	0.785621
GOTERM_BP	GO:0043588~skin development	6	0.0847558	-1.07183	hmcn2, casp3b, rps6ka3a, casp3a, fbln1, grhl1	2363	14	13373	2.42543	0.809922	0.785621
GOTERM_BP	GO:0007126~meiotic nuclear division	18	0.089801	-1.04672	rad51d, pttg1, espl1, trip13, cenps, cenpx, fbxo5, si:dkey-57a22.11, sgo1, mnd1, bcl2l11, rad51b, rad51, dsn1, ttk, eme1, msh6, si:ch211-199g17.9	2363	69	13373	1.47635	0.855143	0.829486
GOTERM_BP	GO:0045786~negative regulation of cell cycle	23	0.0948894	-1.02278	mad2l1, dtl, fanci, cdkn1a, ndc80, bub1ba, chfr, bub1, fbxo5, e2f7, anapc10, BX682558.1, zwilch, e2f8, rb1, aurkb, ccnd1, chek1, tp53, ttk, cdkn1d, eme1, bub1bb	2363	94	13373	1.38473	0.900461	0.873443
GOTERM_BP	GO:0033045~regulation of sister chromatid segregation	8	0.0962116	-1.01677	mad2l1, bub1ba, ndc80, espl1, bub1, cdca5, bub1bb, anapc10	2363	23	13373	1.96846	0.907399	0.880173
GOTERM_BP	GO:0002064~epithelial cell development	16	0.0962845	-1.01644	anln, shroom3, slc43a1a, aldh1a2, foxc1a, tnfrsf19, apol1, jag1b, cldn5a, iqgap2, ascl1a, rilpl2, itga5, crb2b, myh9a, grhl1	2363	60	13373	1.50916	0.907399	0.880173
GOTERM_BP	GO:0072175~epithelial tube formation	10	0.0975574	-1.01074	mpp5a, phactr4a, vangl2, shroom3, mdka, dvl3a, pard6a, aldh1a2, smo, dvl2	2363	32	13373	1.76854	0.913098	0.885701
GOTERM_BP	GO:0008589~regulation of smoothened signaling pathway	10	0.0975574	-1.01074	hhip, sox11a, ugdh, boc, sox4b, cdon, rfx4, sox4a, rest, smo	2363	32	13373	1.76854	0.913098	0.885701
GOTERM_BP	GO:0005996~monosaccharide metabolic process	17	0.0983371	-1.00728	gale, fuca2, pfkfb2b, dhdhl, gapdh, fbp1a, galk2, pfkfb3, zgc:101723, pmm2, fuca1.1, pck2, galm, galk1, pfkfb4b, fuca1.2, man2a1	2363	65	13373	1.48013	0.917253	0.889732
GOTERM_BP	GO:0030036~actin cytoskeleton organization	69	0.0998493	-1.00065	cnn3a, ppp1r9alb, arfip1, gna13a, cdc42ep3, hcls1, wipf2a, cbfb, pacsin2, parvaa, capgb, naca, slc8a1a, vaspb, trpv4, tnnt3b, erbb2, arpc1b, ehd2b, cnn2, sdc4, cdc42ep5, tmsb, cnn3b, xirp2a, vangl2, obscnb, pfn1, wasf2, fmn2a, CABZ01030862.1, smo, tfpi2, fmnl3, sdad1, tagln2, ctnna1, baiap2b, myh9b, ttn.1, arpc5b, myoz1a, fmnl1a, vaspa, gna12a, tln1, arpc4, tpm4a, lmod1b, wipf1b, wasa, pls3, wasb…	2363	332	13373	1.17619	0.928191	0.900342

## Sheet: GO-BP_14dpl
Category	Term	Count	PValue	log10(Pvalue)	Genes	List.Total	Pop.Hits	Pop.Total	Fold.Enrichment	Benjamini	FDR
GOTERM_BP	GO:0007166~cell surface receptor signaling pathway	154	8.48659e-11	-10.0713	fzd7b, pdgfra, adgrg1, epha6, boc, her15.1, inhbab, prlra, csnk1db, sema3fb, sox4a, dvl2, lrp5, fpr1, neo1a, fgf1a, spry4, fzd10, angpt1, fzd4, gli1, csf1rb, fzd2, rgs3a, ephb4b, rtn4rl2a, prokr1a, notch1b, smo, trabd2a, cd151l, sfrp1a, calcrlb, npy8br, chrd, wnt3a, wnt7bb, itgb5, cd79b, lzts2a, mylipb, notch2, klhl6, npas4a, sema6d, irak1, wls, mcl1a, osr1, cd81b, jag1b, vipr2, pdgfrb, rtn4rl2b,…	1036	1190	13373	1.67049	1.72702e-07	1.64979e-07
GOTERM_BP	GO:0048513~animal organ development	218	1.16366e-07	-6.93417	ajuba, foxj1a, cenpf, sema3fb, sox4a, tie1, snrkb, mmp14b, fgf1a, foxn4, e2f8, slc2a12, cd74b, gli1, dcdc2b, armc4, gnrh3, smo, enpp1, notch1b, nfil3, sfrp1a, pim1, igf2a, notch2, crip2, ptprq, cdca7a, sema6d, cdca8, tnfrsf19, jag1b, uhrf1, col6a1, cemip2, wt1b, jupa, sema3gb, tsen54, mcm2, sema4e, adgrg6, slc7a7, cdipt, ndnf, gpc4, dlb, gfi1ab, otx1, foxc1a, dkk2, egr2b, arf1, casp8, crb2b, fezf…	1036	2027	13373	1.38826	8.39348e-05	8.01814e-05
GOTERM_BP	GO:0071103~DNA conformation change	31	1.23737e-07	-6.9075	si:ch1073-159d7.7, CR354435.1, ncapd2, gins2, zgc:173585, smc2, CU459186.3, si:dkey-23a13.17, zgc:163061, ncapg, chaf1a, zgc:173552, si:dkey-108k21.21, si:ch1073-153i20.4, zgc:153405, si:ch73-368j24.11, top2a, recql4, CU459186.6, si:ch211-113a14.12, chaf1b, hist2h3c, ncapd3, si:dkey-108k21.10, si:ch211-113a14.11, si:ch211-113a14.24, si:ch211-113a14.18, zgc:154164, si:dkey-23a13.9, HIST1H4D, si:dk…	1036	136	13373	2.94233	8.39348e-05	8.01814e-05
GOTERM_BP	GO:0007423~sensory organ development	71	1.27419e-06	-5.89477	her15.1, wwtr1, sox4a, dla, smad5, scinla, lamb1a, foxn4, sox21b, erbb2, gart, s1pr2, rgs18, cd74b, sox11a, mmp14a, myb, dcdc2b, vangl2, rtn4rl2a, gnrh3, sox11b, ccna2, nes, mcm3, smo, fn1a, tcf7l1a, sfrp1a, tfap2a, igf2bp1, tyms, ccnd1, egr1, chrd, pim1, smoc1, fsta, lgsn, ptprq, rx1, nkd1, foxc1b, wls, tnfrsf19, marcksa, jag1b, uhrf1, ascl1a, mcm2, lama1, sox3, adgrg6, cdipt, shroom3, sox4b, gp…	1036	507	13373	1.80767	0.000568062	0.00054266
GOTERM_BP	GO:0048568~embryonic organ development	70	1.44443e-06	-5.8403	gli2a, pdgfra, foxj1a, bmp3, prdm5, cenpf, macc1, sox4a, lrp5, dla, smad5, snrkb, lamb1a, foxn4, s1pr2, lfng, sox11a, fzd2, mmp14a, dcdc2b, vangl2, fas, sox11b, nes, smo, fn1a, tcf7l1a, csf3r, ponzr1, sfrp1a, tfap2a, egr1, chrd, wnt3a, igf2a, pdlim7, smoc1, fsta, ptprq, nkd1, wls, egfl6, jag1b, zic2b, pdgfrb, ascl1a, cemip2, pkd2, pkn2, lama1, sox3, adgrg6, col2a1a, sox4b, ndnf, pappa2, gpc4, tfa…	1036	499	13373	1.81078	0.000568062	0.00054266
GOTERM_BP	GO:0006334~nucleosome assembly	24	1.67488e-06	-5.77602	CR354435.1, si:ch1073-159d7.7, zgc:173585, CU459186.3, si:dkey-23a13.17, zgc:163061, chaf1a, si:dkey-108k21.21, zgc:173552, zgc:153405, si:ch1073-153i20.4, si:ch73-368j24.11, CU459186.6, si:ch211-113a14.12, chaf1b, hist2h3c, si:dkey-108k21.10, si:ch211-113a14.11, si:ch211-113a14.24, zgc:154164, si:ch211-113a14.18, si:dkey-23a13.9, HIST1H4D, si:dkey-261m9.12, zgc:173552	1036	100	13373	3.09799	0.000568062	0.00054266
GOTERM_BP	GO:0016331~morphogenesis of embryonic epithelium	16	2.48532e-06	-5.60462	sox11a, vangl2, shroom3, nkd1, sox4b, zic5, sox11b, foxc1a, sox4a, dvl2, neurod4, smo, neo1a, sfrp1a, dvl3a, smoc1	1036	49	13373	4.21496	0.000722518	0.000690209
GOTERM_BP	GO:0031497~chromatin assembly	24	4.07845e-06	-5.38951	CR354435.1, si:ch1073-159d7.7, zgc:173585, CU459186.3, si:dkey-23a13.17, zgc:163061, chaf1a, si:dkey-108k21.21, zgc:173552, zgc:153405, si:ch1073-153i20.4, si:ch73-368j24.11, CU459186.6, si:ch211-113a14.12, chaf1b, hist2h3c, si:dkey-108k21.10, si:ch211-113a14.11, si:ch211-113a14.24, zgc:154164, si:ch211-113a14.18, si:dkey-23a13.9, HIST1H4D, si:dkey-261m9.12, zgc:173552	1036	105	13373	2.95047	0.00103746	0.000991063
GOTERM_BP	GO:0006333~chromatin assembly or disassembly	24	7.92449e-06	-5.10103	CR354435.1, si:ch1073-159d7.7, zgc:173585, CU459186.3, si:dkey-23a13.17, zgc:163061, chaf1a, si:dkey-108k21.21, zgc:173552, zgc:153405, si:ch1073-153i20.4, si:ch73-368j24.11, CU459186.6, si:ch211-113a14.12, chaf1b, hist2h3c, si:dkey-108k21.10, si:ch211-113a14.11, si:ch211-113a14.24, zgc:154164, si:ch211-113a14.18, si:dkey-23a13.9, HIST1H4D, si:dkey-261m9.12, zgc:173552	1036	109	13373	2.84219	0.00179182	0.00171169
GOTERM_BP	GO:0034728~nucleosome organization	24	1.08849e-05	-4.96318	CR354435.1, si:ch1073-159d7.7, zgc:173585, CU459186.3, si:dkey-23a13.17, zgc:163061, chaf1a, si:dkey-108k21.21, zgc:173552, zgc:153405, si:ch1073-153i20.4, si:ch73-368j24.11, CU459186.6, si:ch211-113a14.12, chaf1b, hist2h3c, si:dkey-108k21.10, si:ch211-113a14.11, si:ch211-113a14.24, zgc:154164, si:ch211-113a14.18, si:dkey-23a13.9, HIST1H4D, si:dkey-261m9.12, zgc:173552	1036	111	13373	2.79098	0.00221508	0.00211603
GOTERM_BP	GO:0065004~protein-DNA complex assembly	27	1.57492e-05	-4.80274	si:ch1073-159d7.7, CR354435.1, mis12, cenpi, zgc:173585, CU459186.3, si:dkey-23a13.17, zgc:163061, chaf1a, zgc:173552, si:dkey-108k21.21, si:ch1073-153i20.4, zgc:153405, si:ch73-368j24.11, CU459186.6, si:ch211-113a14.12, chaf1b, hist2h3c, rad51b, si:dkey-108k21.10, si:ch211-113a14.11, si:ch211-113a14.24, si:ch211-113a14.18, zgc:154164, si:dkey-23a13.9, HIST1H4D, si:dkey-261m9.12, zgc:173552	1036	137	13373	2.54397	0.00291361	0.00278332
GOTERM_BP	GO:0048598~embryonic morphogenesis	80	1.85426e-05	-4.73183	fzd7b, gli2a, pdgfra, dusp2, foxj1a, bmp3, prdm5, dusp4, cenpf, macc1, sox4a, dvl2, lrp5, smad5, snrkb, mmp14b, neo1a, lamb1a, foxn4, s1pr2, gli1, sox11a, fzd2, mmp14a, dcdc2b, vangl2, pfn1, gli2b, zic5, sox11b, snai1b, smo, fn1a, tcf7l1a, ponzr1, sfrp1a, tfap2a, egr1, chrd, pdlim7, smoc1, fsta, lzts2a, mylipb, ptprq, nkd1, hmcn2, wls, pcdh18a, osr1, jag1b, zic2b, pdgfrb, sox19b, cemip2, pkd2, dv…	1036	639	13373	1.61606	0.00314451	0.0030039
GOTERM_BP	GO:0006355~regulation of transcription, DNA-templated	184	2.57514e-05	-4.5892	znf367, foxl2a, mybl1, pparg, tead1a, ajuba, foxj1a, rorcb, nfatc4, nr1d2b, bhlhe40, foxd2, irf9, cipcb, neo1a, fgf1a, foxn4, otpb, e2f8, sox21b, si:dkey-18a10.3, egr3, gli1, top2a, cry-dash, cipca, notch1b, si:ch211-161c3.6, nfil3, hist1h2a11, nr1d4a, mafk, sox8b, sfrp1a, nfil3-5, fosab, si:ch73-63e15.2, ccnd1, egr1, chrd, hist1h2a4, her8.2, alx4a, myclb, id3, lzts2a, nfe2l1a, notch2, cdca7a, jd…	1036	1788	13373	1.32837	0.00403109	0.00385083
GOTERM_BP	GO:2001141~regulation of RNA biosynthetic process	184	2.88108e-05	-4.54044	znf367, foxl2a, mybl1, pparg, tead1a, ajuba, foxj1a, rorcb, nfatc4, nr1d2b, bhlhe40, foxd2, irf9, cipcb, neo1a, fgf1a, foxn4, otpb, e2f8, sox21b, si:dkey-18a10.3, egr3, gli1, top2a, cry-dash, cipca, notch1b, si:ch211-161c3.6, nfil3, hist1h2a11, nr1d4a, mafk, sox8b, sfrp1a, nfil3-5, fosab, si:ch73-63e15.2, ccnd1, egr1, chrd, hist1h2a4, her8.2, alx4a, myclb, id3, lzts2a, nfe2l1a, notch2, cdca7a, jd…	1036	1792	13373	1.32541	0.00418786	0.00400059
GOTERM_BP	GO:0009887~organ morphogenesis	79	3.86193e-05	-4.4132	quo, gli2a, pdgfra, foxj1a, bmp3, prdm5, cenpf, macc1, sox4a, dvl2, lrp5, smad5, fgf1a, lamb1a, foxn4, erbb2, s1pr2, gli1, sox11a, fzd2, mmp14a, dcdc2b, vangl2, gli2b, sox11b, snai1b, cxcr4b, acta1a, smo, fn1a, tcf7l1a, ponzr1, sfrp1a, tfap2a, ccnd1, egr1, chrd, pim1, pdlim7, smoc1, fsta, lgsn, ptprq, notch2, rx1, nkd1, hmcn2, wls, marcksa, jag1b, zic2b, pdgfrb, ascl1a, cemip2, pkd2, dvl3a, tsen5…	1036	642	13373	1.5884	0.00513085	0.00490141
GOTERM_BP	GO:1905114~cell surface receptor signaling pathway involved in cell-cell signaling	35	4.03409e-05	-4.39425	fzd7b, lzts2a, tob1a, mylipb, nkd1, npas4a, npffl, prdm5, csnk1db, wls, lrp5, nkd2a, dvl2, CR388166.1, sybu, dvl3a, jupa, fzd10, fzd4, ptk7a, fzd2, dkk3a, rgs3a, vangl2, iqgap1, zic5, dkk2, smo, tcf7l1a, trabd2a, sfrp1a, fzd7a, wnt3a, wnt7bb, wnt5b	1036	213	13373	2.12108	0.00513085	0.00490141
GOTERM_BP	GO:0048925~lateral line system development	21	5.05027e-05	-4.29669	dcdc2b, adgrg6, rtn4rl2a, shroom3, foxd3, f11r.1, esr1, cxcr4b, dkk2, tnfrsf19, egr2b, cd74a, smad5, erbb3b, edn1, erbb2, yap1, s1pr2, rgs18, cd74b, wnt5b	1036	98	13373	2.76606	0.00570961	0.00545429
GOTERM_BP	GO:0048880~sensory system development	21	5.05027e-05	-4.29669	dcdc2b, adgrg6, rtn4rl2a, shroom3, foxd3, f11r.1, esr1, cxcr4b, dkk2, tnfrsf19, egr2b, cd74a, smad5, erbb3b, edn1, erbb2, yap1, s1pr2, rgs18, cd74b, wnt5b	1036	98	13373	2.76606	0.00570961	0.00545429
GOTERM_BP	GO:0051252~regulation of RNA metabolic process	186	5.38989e-05	-4.26842	znf367, foxl2a, mybl1, pparg, tead1a, ajuba, foxj1a, rorcb, nfatc4, nr1d2b, bhlhe40, foxd2, irf9, cipcb, neo1a, fgf1a, foxn4, otpb, e2f8, sox21b, si:dkey-18a10.3, egr3, gli1, top2a, cry-dash, cipca, notch1b, si:ch211-161c3.6, nfil3, hist1h2a11, nr1d4a, mafk, sox8b, sfrp1a, nfil3-5, fosab, si:ch73-63e15.2, ccnd1, egr1, chrd, hist1h2a4, her8.2, alx4a, myclb, id3, lzts2a, rbfox1l, nfe2l1a, notch2, c…	1036	1834	13373	1.30913	0.00577286	0.00551471
GOTERM_BP	GO:0045892~negative regulation of transcription, DNA-templated	40	6.17136e-05	-4.20962	id3, junba, rel, erf, nab2, cry1bb, osr1, uhrf1, cry1ab, hist1h2a11, skilb, bhlhe40, cipcb, nab1a, e2f8, sox21b, bhlhe41, hist1h2a10, si:ch211-132b12.7, junbb, hist1h2a4, cry1ba, cry-dash, foxd3, gfi1ab, cipca, hist1h2a4, insm1a, hist1h2a11, arntl1a, cry2, cry4, ccnd1, jund, fezf2, bcl6b, si:ch211-113a14.11, hist1h2a4, zgc:154164, hist1h2a4	1036	263	13373	1.96324	0.00598034	0.00571292
GOTERM_BP	GO:1902679~negative regulation of RNA biosynthetic process	40	6.17136e-05	-4.20962	id3, junba, rel, erf, nab2, cry1bb, osr1, uhrf1, cry1ab, hist1h2a11, skilb, bhlhe40, cipcb, nab1a, e2f8, sox21b, bhlhe41, hist1h2a10, si:ch211-132b12.7, junbb, hist1h2a4, cry1ba, cry-dash, foxd3, gfi1ab, cipca, hist1h2a4, insm1a, hist1h2a11, arntl1a, cry2, cry4, ccnd1, jund, fezf2, bcl6b, si:ch211-113a14.11, hist1h2a4, zgc:154164, hist1h2a4	1036	263	13373	1.96324	0.00598034	0.00571292
GOTERM_BP	GO:0010468~regulation of gene expression	205	6.93283e-05	-4.15909	foxl2a, mybl1, pparg, ajuba, foxj1a, rorcb, nfatc4, ciarta, nr1d2b, irf9, fgf1a, foxn4, e2f8, si:dkey-18a10.3, egr3, gli1, cry-dash, dre-mir-212, notch1b, nfil3, hist1h2a11, nr1d4a, mafk, sfrp1a, nfil3-5, her8.2, id3, lzts2a, nfe2l1a, notch2, cdca7a, jdp2b, irak1, cry1bb, uhrf1, wt1b, nfatc1, chac1, stat6, her9, tbx21, serpine1, esr1, gfi1ab, otx1, foxc1a, egr2b, nr4a1, nr1d2a, cebpd, mov10b.1, r…	1036	2063	13373	1.2827	0.00641287	0.0061261
GOTERM_BP	GO:0010556~regulation of macromolecule biosynthetic process	201	8.14977e-05	-4.08885	foxl2a, mybl1, pparg, ajuba, foxj1a, rorcb, nfatc4, nr1d2b, irf9, fgf1a, foxn4, e2f8, si:dkey-18a10.3, egr3, gli1, cry-dash, dre-mir-212, notch1b, nfil3, hist1h2a11, nr1d4a, mafk, sfrp1a, nfil3-5, her8.2, id3, lzts2a, nfe2l1a, notch2, cdca7a, jdp2b, irak1, cry1bb, uhrf1, wt1b, nfatc1, stat6, her9, tbx21, esr1, gfi1ab, otx1, foxc1a, egr2b, nr4a1, nr1d2a, cebpd, mov10b.1, rorca, BX000363.1, fosl1a,…	1036	2022	13373	1.28317	0.00720905	0.00688668
GOTERM_BP	GO:0006351~transcription, DNA-templated	149	8.50207e-05	-4.07048	znf367, foxl2a, pparg, tead1a, foxj1a, rorcb, si:ch211-13k12.2, nr1d2b, bhlhe40, cipcb, neo1a, fgf1a, foxn4, otpb, e2f8, sox21b, si:dkey-18a10.3, egr3, gli1, top2a, cry-dash, cipca, nfil3, hist1h2a11, nr1d4a, mafk, sfrp1a, hivep1, fosab, ccnd1, egr1, chrd, hist1h2a4, her8.2, alx4a, id3, lzts2a, nfe2l1a, jdp2b, tbx15, npas4a, fosb, mafba, irak1, cry1bb, osr1, uhrf1, sox19b, ascl1b, stat6, sox3, he…	1036	1424	13373	1.35066	0.00720905	0.00688668
GOTERM_BP	GO:1903047~mitotic cell cycle process	38	9.03778e-05	-4.04394	lzts1, lzts2a, ccne1, lrmp, psme1, mis12, kif11, bub1, snx18b, cep57l1, cdca8, ncapd2, tmpoa, mcl1a, gins2, smc2, ska1, mybl2b, wdr62, mcl1b, rgcc, cenpe, ncapg, snx33, fanci, mad2l1, si:dkey-25o16.4, vangl2, fbxo5, ccna2, nek8, ercc6l, ncapd3, sass6, ccnd1, dsn1, rcc2, kif23	1036	249	13373	1.96994	0.00735675	0.00702778
GOTERM_BP	GO:0032774~RNA biosynthetic process	191	0.000102499	-3.98928	znf367, foxl2a, mybl1, pparg, tead1a, ajuba, foxj1a, rorcb, si:ch211-13k12.2, nfatc4, nr1d2b, bhlhe40, foxd2, irf9, cipcb, neo1a, fgf1a, foxn4, otpb, e2f8, sox21b, si:dkey-18a10.3, egr3, gli1, top2a, cry-dash, cipca, notch1b, si:ch211-161c3.6, nfil3, hist1h2a11, nr1d4a, mafk, sox8b, sfrp1a, hivep1, nfil3-5, fosab, si:ch73-63e15.2, ccnd1, egr1, chrd, hist1h2a4, her8.2, alx4a, myclb, id3, lzts2a, n…	1036	1914	13373	1.28813	0.00771605	0.00737101
GOTERM_BP	GO:0001667~ameboidal-type cell migration	34	0.000103914	-3.98333	lzts2a, amot, hmcn2, foxc1b, sema6d, pcdh18a, sema3fb, lrp5, smad5, mmp14b, erbb2, s1pr2, sema3gb, sema4e, mmp14a, apoc1, hspg2, vangl2, foxd3, gpc4, snai1b, cxcr4b, foxc1a, fn1a, mt2, csf1ra, fzd7a, erbb3b, chrd, robo4, col18a1a, rcc2, gna13b, wnt5b	1036	214	13373	2.05085	0.00771605	0.00737101
GOTERM_BP	GO:0009966~regulation of signal transduction	101	0.000107604	-3.96817	gadd45ba, ajuba, boc, inhbab, igfbp1a, sox4a, lrp5, neo1a, fgf1a, spry4, arhgef2, gli1, rgs3a, rtn4rl2a, cdc42se2, smo, tradd, trabd2a, sfrp1a, chrd, rasa4, lzts2a, bbc3, mylipb, plekhg4, cart2, tnfrsf19, mcl1a, egfl6, osr1, ramp2, rtn4rl2b, sybu, jupa, chac1, tgfb2l, dkk3a, tnfrsf1b, sox4b, pappa2, cdon, rtn4r, foxc1a, dkk2, mstna, gadd45bb, tnfaip8l1, fezf2, bmp7b, rnf152, quo, arhgef40, tespa1…	1036	898	13373	1.45182	0.00771605	0.00737101
GOTERM_BP	GO:0051253~negative regulation of RNA metabolic process	40	0.000109958	-3.95877	id3, junba, rel, erf, nab2, cry1bb, osr1, uhrf1, cry1ab, hist1h2a11, skilb, bhlhe40, cipcb, nab1a, e2f8, sox21b, bhlhe41, hist1h2a10, si:ch211-132b12.7, junbb, hist1h2a4, cry1ba, cry-dash, foxd3, gfi1ab, cipca, hist1h2a4, insm1a, hist1h2a11, arntl1a, cry2, cry4, ccnd1, jund, fezf2, bcl6b, si:ch211-113a14.11, hist1h2a4, zgc:154164, hist1h2a4	1036	270	13373	1.91234	0.00771605	0.00737101
GOTERM_BP	GO:0034654~nucleobase-containing compound biosynthetic process	211	0.000141555	-3.84907	foxl2a, mybl1, pparg, ajuba, foxj1a, rorcb, si:ch211-13k12.2, nfatc4, nr1d2b, irf9, adkb, fgf1a, foxn4, e2f8, si:dkey-18a10.3, egr3, gli1, gucy2d, cry-dash, notch1b, nfil3, adcy3b, hist1h2a11, nr1d4a, mafk, hivep1, sfrp1a, nfil3-5, her8.2, id3, lzts2a, nfe2l1a, notch2, cdca7a, jdp2b, irak1, cry1bb, rrm1, uhrf1, wt1b, nfatc1, stat6, her9, tbx21, esr1, gfi1ab, otx1, foxc1a, egr2b, nr4a1, nr1d2a, ce…	1036	2160	13373	1.26095	0.00930457	0.0088885
GOTERM_BP	GO:0048562~embryonic organ morphogenesis	49	0.00014174	-3.84851	gli2a, pdgfra, foxj1a, bmp3, prdm5, cenpf, macc1, sox4a, lrp5, smad5, lamb1a, foxn4, s1pr2, sox11a, fzd2, mmp14a, dcdc2b, vangl2, sox11b, smo, fn1a, tcf7l1a, ponzr1, sfrp1a, tfap2a, egr1, chrd, pdlim7, smoc1, fsta, ptprq, nkd1, wls, jag1b, zic2b, pdgfrb, cemip2, pkd2, pkn2, sox3, adgrg6, sox4b, ndnf, tfap2c, otx1, foxc1a, nek8, edn1, wnt5b	1036	360	13373	1.75696	0.00930457	0.0088885
GOTERM_BP	GO:0006270~DNA replication initiation	9	0.00015	-3.82391	cdc7, mcm5, mcm6, cdc6, mcm2, mcm4, mcm3, gins2, mcm10	1036	22	13373	5.28067	0.00953904	0.00911248
GOTERM_BP	GO:0003002~regionalization	47	0.000157828	-3.80182	gli2a, lzts2a, tob1a, gadd45ba, nkd1, her15.1, mafba, wls, lrp5, jag1b, smad5, sox19b, scinla, neo1a, mmp14b, pkd2, foxn4, sybu, rfx4, rgs18, ptk7a, rest, gli1, mmp14a, vangl2, gli2b, sox11b, gpc4, foxc1a, igf1, smo, dlc, fn1a, gadd45bb, tcf7l1a, dld, tgif1, chrd, edn1, notch1a, yap1, wnt3a, igf2a, pdlim7, hspb7, dusp6, fsta	1036	342	13373	1.77395	0.0097327	0.00929748
GOTERM_BP	GO:0050830~defense response to Gram-positive bacterium	11	0.000173541	-3.7606	hist1h2a11, hist1h2a11, si:ch211-113a14.11, hist1h2a11, hist1h2a4, hist1h2a3, hist1h2a11, hist1h2a4, hist1h2a11, hist1h2a4, hist1h2a4	1036	34	13373	4.17622	0.010387	0.00992248
GOTERM_BP	GO:2000112~regulation of cellular macromolecule biosynthetic process	197	0.000198792	-3.7016	foxl2a, mybl1, pparg, ajuba, foxj1a, rorcb, nfatc4, nr1d2b, irf9, fgf1a, foxn4, e2f8, si:dkey-18a10.3, egr3, gli1, cry-dash, dre-mir-212, notch1b, nfil3, hist1h2a11, nr1d4a, mafk, sfrp1a, nfil3-5, her8.2, id3, lzts2a, nfe2l1a, notch2, cdca7a, jdp2b, irak1, cry1bb, uhrf1, wt1b, nfatc1, stat6, her9, tbx21, esr1, gfi1ab, otx1, foxc1a, egr2b, nr4a1, nr1d2a, cebpd, mov10b.1, rorca, BX000363.1, fosl1a,…	1036	2006	13373	1.26766	0.0115583	0.0110415
GOTERM_BP	GO:0042246~tissue regeneration	20	0.000208872	-3.68012	fzd2, prph, notch2, acanb, cxcr4b, notch1b, jag1b, insm1a, esco2, ascl1a, hapln1a, lamb1a, tgif1, erbb3b, erbb2, col1a1a, yap1, lfng, junbb, wnt5b	1036	100	13373	2.58166	0.011807	0.0112791
GOTERM_BP	GO:0022008~neurogenesis	97	0.000216915	-3.66371	adgrg1, boc, sema3fb, per1b, neo1a, foxn4, otpb, e2f8, cdkn1ca, hmgcs1, gli1, dcdc2b, pcsk9, notch1b, smo, si:ch211-195b13.1, kif26ab, mmp2, wnt3a, wnt7bb, id3, kif26bb, tuba8l3, cyfip1, sema6d, jag1b, dpysl2b, ascl1b, kctd12.1, sema3gb, cnp, chac1, lama1, sox3, sema4e, her9, adgrg6, slc7a7, cdipt, cdon, clcf1, rtn4r, gfi1ab, egr2b, dlc, insm1a, crb2b, fezf2, bcl6b, gna13b, gli2a, kif11, dla, dre…	1036	871	13373	1.43755	0.0119303	0.0113968
GOTERM_BP	GO:0098542~defense response to other organism	26	0.000228377	-3.64135	mxa, hist1h2a11, hist1h2a11, mpeg1.1, ifit11, CR759879.1, nod1, hist1h2a11, hist1h2a4, dram1, ifit16, tlr3, ifit10, marco, hist1h2a3, mxc, mxb, hist1h2a4, ifit8, hist1h2a11, hist1h2a11, si:ch211-113a14.11, hist1h2a4, mxe, hist1h2a4, tlr9	1036	151	13373	2.22262	0.0122302	0.0116833
GOTERM_BP	GO:0001944~vasculature development	56	0.000236583	-3.62602	junba, pdgfra, amot, kif11, tie1, dla, smad5, fgf1a, e2f8, lpar6a, angpt1, s1pr2, pak2a, fli1b, hspg2, arhgef9b, notch1b, smo, fn1a, mmp2, fmnl3, robo4, pkd1b, dab2, srpx2, pkd1a, notch2, mafba, foxc1b, tnfrsf19, osr1, pdgfrb, pkd2, per2, junbb, lama1, angpt4, phkg1a, tnfrsf1b, adgrb1b, adgrg6, pappa2, ism1, mcamb, foxc1a, dlc, ptprja, mt2, ephx2, crb2b, notch1a, itga9, efna1b, ntn4, wnt5b, gna13b	1036	438	13373	1.65038	0.0123448	0.0117927
GOTERM_BP	GO:0002009~morphogenesis of an epithelium	54	0.000251252	-3.59989	fzd7b, ier2a, foxj1a, cenpf, sox4a, dvl2, smad5, mmp14b, neo1a, fgf1a, foxn4, fzd10, s1pr2, sox11a, fzd2, mmp14a, vangl2, pfn1, zic5, sox11b, snai1b, smo, fn1a, ponzr1, sfrp1a, tfap2a, dcn, chrd, wnt3a, pdlim7, smoc1, fsta, lzts2a, nkd1, pcdh18a, sox19b, cemip2, pkd2, dvl3a, ptk7a, sox3, shroom3, sox4b, gpc4, tfap2c, mcamb, foxc1a, nek8, neurod4, tax1bp3, fzd7a, hspb7, wnt5b, gna13b	1036	419	13373	1.6636	0.0127824	0.0122108
GOTERM_BP	GO:0007417~central nervous system development	70	0.000259518	-3.58583	gli2a, adgrg1, her15.1, cenpf, dvl2, dla, scinla, spry4, lamb1a, foxn4, otpb, dmrta2, angpt1, asphd1, gli1, msi1, hmgcs1, sox11a, vangl2, gnrh3, gli2b, zic5, sox11b, nes, cxcr4b, pcsk9, notch1b, smo, fn1a, tcf7l1a, tfap2a, wnt3a, fsta, irf8, npas4a, mafba, wls, acanb, ecrg4a, tnfrsf19, marcksa, dpysl2b, zic2b, bdnf, ascl1a, ascl1b, kctd12.1, tsen54, rfx4, atp1a3b, rest, csrnp1b, met, lama1, sox3,…	1036	585	13373	1.54458	0.012881	0.012305
GOTERM_BP	GO:0001654~eye development	47	0.000328004	-3.48412	lgsn, rx1, nkd1, her15.1, foxc1b, wwtr1, sox4a, marcksa, uhrf1, scinla, lamb1a, foxn4, sox21b, gart, mcm2, lama1, sox11a, mmp14a, myb, vangl2, cdipt, gnrh3, sox4b, sox11b, gpc4, nes, ccna2, foxc1a, mcm3, chaf1b, otx1, smo, fn1a, tcf7l1a, insm1a, csf1ra, tfap2a, sfrp1a, igf2bp1, tyms, dio1, ccnd1, egr1, crb2b, yap1, pim1, smoc1	1036	353	13373	1.71867	0.0158354	0.0151273
GOTERM_BP	GO:0016055~Wnt signaling pathway	32	0.000337111	-3.47223	fzd7b, lzts2a, tob1a, mylipb, nkd1, prdm5, csnk1db, wls, lrp5, nkd2a, dvl2, sybu, dvl3a, jupa, fzd10, fzd4, ptk7a, fzd2, dkk3a, rgs3a, vangl2, iqgap1, zic5, dkk2, smo, tcf7l1a, trabd2a, sfrp1a, fzd7a, wnt3a, wnt7bb, wnt5b	1036	209	13373	1.97639	0.0158354	0.0151273
GOTERM_BP	GO:0043010~camera-type eye development	40	0.000342387	-3.46548	lgsn, rx1, foxc1b, wwtr1, sox4a, marcksa, uhrf1, foxn4, sox21b, gart, mcm2, lama1, sox11a, mmp14a, cdipt, gnrh3, sox4b, sox11b, nes, ccna2, foxc1a, mcm3, chaf1b, otx1, smo, fn1a, tcf7l1a, insm1a, csf1ra, tfap2a, sfrp1a, igf2bp1, tyms, dio1, ccnd1, egr1, crb2b, yap1, pim1, smoc1	1036	285	13373	1.81169	0.0158354	0.0151273
GOTERM_BP	GO:0198738~cell-cell signaling by wnt	32	0.000366949	-3.43539	fzd7b, lzts2a, tob1a, mylipb, nkd1, prdm5, csnk1db, wls, lrp5, nkd2a, dvl2, sybu, dvl3a, jupa, fzd10, fzd4, ptk7a, fzd2, dkk3a, rgs3a, vangl2, iqgap1, zic5, dkk2, smo, tcf7l1a, trabd2a, sfrp1a, fzd7a, wnt3a, wnt7bb, wnt5b	1036	210	13373	1.96698	0.0165503	0.0158102
GOTERM_BP	GO:0009953~dorsal/ventral pattern formation	25	0.000374111	-3.427	gli2a, lzts2a, tob1a, lrp5, jag1b, smad5, sox19b, scinla, pkd2, foxn4, sybu, rfx4, rest, gli1, gli2b, sox11b, igf1, smo, tcf7l1a, chrd, edn1, yap1, wnt3a, dusp6, fsta	1036	147	13373	2.19529	0.0165503	0.0158102
GOTERM_BP	GO:0007219~Notch signaling pathway	16	0.000395695	-3.40264	notch2, her15.1, dlb, CABZ01109021.1, foxc1a, notch1b, dlc, jag1b, dla, dld, notchl, notch1a, dab2, jag1a, chac1, lfng	1036	73	13373	2.82922	0.0167318	0.0159836
GOTERM_BP	GO:0021782~glial cell development	12	0.000402093	-3.39567	irf8, adgrg1, adgrg6, slc7a7, tuba8l3, erbb3b, foxd3, erbb2, egr2b, smo, gna13b, hmgcs1	1036	44	13373	3.52045	0.0167318	0.0159836
GOTERM_BP	GO:0010629~negative regulation of gene expression	54	0.000405509	-3.392	junba, ajuba, mov10b.2, bhlhe40, piwil1, cipcb, dre-mir-132-1, nab1a, e2f8, sox21b, bhlhe41, si:ch211-132b12.7, hist1h2a10, hist1h2a4, cry1ba, cry-dash, dre-mir-212, cipca, sb:cb81, hist1h2a11, cry2, arntl1a, cry4, ccnd1, jund, si:ch211-113a14.11, hist1h2a4, zgc:154164, id3, zfp36l1a, rel, erf, nab2, cry1bb, osr1, uhrf1, cry1ab, skilb, hist1h2a11, ascl1a, chac1, rest, junbb, foxd3, serpine1, gfi1…	1036	427	13373	1.63243	0.0167318	0.0159836
GOTERM_BP	GO:0010605~negative regulation of macromolecule metabolic process	67	0.000411101	-3.38605	junba, tfpia, ajuba, itm2cb, mov10b.2, sh3bp5la, bhlhe40, piwil1, cipcb, dre-mir-132-1, nab1a, spry4, e2f8, sox21b, bhlhe41, si:ch211-132b12.7, hist1h2a10, pak2a, hist1h2a4, cry1ba, cry-dash, rtn4rl2a, dre-mir-212, cipca, sb:cb81, hist1h2a11, cry2, arntl1a, dcn, cry4, ccnd1, jund, si:ch211-113a14.11, hist1h2a4, zgc:154164, id3, zfp36l1a, rel, erf, mcl1a, nab2, cry1bb, osr1, uhrf1, cry1ab, skilb, …	1036	563	13373	1.53616	0.0167318	0.0159836
GOTERM_BP	GO:0032922~circadian regulation of gene expression	6	0.000498368	-3.30245	bhlhe40, per3, nfil3-5, ciarta, nfil3-6, nr1d2a	1036	10	13373	7.74498	0.0196913	0.0188107
GOTERM_BP	GO:0009617~response to bacterium	29	0.000503167	-3.29829	junba, hist1h2a11, rhogb, hist1h2a11, mpeg1.1, tfa, nod1, hist1h2a11, junbb, hist1h2a4, tnfrsf1b, dram1, fas, tlr3, cxcr4b, marco, hist1h2a3, hist1h2a4, hist1h2a11, zgc:153759, hist1h2a11, jund, lect2l, si:ch211-113a14.11, hist1h2a4, cxcr3.2, tlr22, hist1h2a4, tlr9	1036	186	13373	2.01258	0.0196913	0.0188107
GOTERM_BP	GO:0008589~regulation of smoothened signaling pathway	10	0.000528722	-3.27677	sox11a, boc, sox4b, cdon, sox11b, rfx4, sox4a, rest, smo, gli1	1036	32	13373	4.03384	0.0203009	0.0193931
GOTERM_BP	GO:0001501~skeletal system development	38	0.000540294	-3.26737	notch2, pdgfra, bmp3, phospho1, prdm5, wls, acanb, macc1, wwtr1, lrp5, jag1b, zic2b, pdgfrb, mmp14b, s1pr2, ptk7a, pkn2, inka1a, mmp14a, foxd3, ndnf, pappa2, gpc4, smo, fn1a, csf1ra, ponzr1, tfap2a, hapln1a, dcn, egr1, ctsk, edn1, yap1, ednraa, dre-mir-153c, wnt5b, fsta	1036	272	13373	1.80337	0.0203611	0.0194506
GOTERM_BP	GO:0010001~glial cell differentiation	15	0.000599297	-3.22236	irf8, adgrg1, adgrg6, tuba8l3, slc7a7, foxd3, egr2b, smo, csf1ra, erbb3b, erbb2, notch1a, cdkn1ca, gna13b, hmgcs1	1036	68	13373	2.84742	0.0220337	0.0210484
GOTERM_BP	GO:0007224~smoothened signaling pathway	12	0.000606332	-3.21729	sox11a, gli2a, boc, sox4b, robo4, cdon, sox11b, rfx4, sox4a, rest, smo, gli1	1036	46	13373	3.36738	0.0220337	0.0210484
GOTERM_BP	GO:0016477~cell migration	62	0.000622532	-3.20584	amot, sema3fb, dvl2, lrp5, smad5, fpr1, mmp14b, fgf1a, erbb2, s1pr2, ccl34b.1, fzd2, mmp14a, myb, cyba, hspg2, vangl2, rtn4rl2a, snai1b, cxcr4b, smo, fn1a, fmnl3, chrd, robo4, cxcr3.2, lzts2a, si:dkey-193c22.2, hmcn2, foxc1b, sema6d, pcdh18a, tnfrsf19, jak3, cemip2, elmo3, sema3gb, ch25h, wasb, rest, met, lama1, sema4e, apoc1, foxd3, gpc4, esr1, serpine1, rac2, ccr9a, foxc1a, nhsl1b, inpp5d, mt2,…	1036	518	13373	1.54501	0.0222255	0.0212316
GOTERM_BP	GO:0090596~sensory organ morphogenesis	36	0.000738236	-3.13181	lgsn, ptprq, rx1, nkd1, sox4a, marcksa, jag1b, smad5, ascl1a, lamb1a, foxn4, sox3, sox11a, mmp14a, dcdc2b, adgrg6, vangl2, cdipt, sox4b, sox11b, tfap2c, foxc1a, otx1, smo, fn1a, tcf7l1a, insm1a, tfap2a, sfrp1a, ccnd1, chrd, egr1, crb2b, pim1, smoc1, fsta	1036	257	13373	1.80817	0.0259019	0.0247436
GOTERM_BP	GO:0009648~photoperiodism	6	0.000855583	-3.06774	arntl1a, per3, per1a, per2, arntl1b, arntl2	1036	11	13373	7.04089	0.0286029	0.0273238
GOTERM_BP	GO:0002072~optic cup morphogenesis involved in camera-type eye development	7	0.000862057	-3.06446	sox11a, sfrp1a, sox4b, sox11b, foxc1a, smoc1, sox4a	1036	16	13373	5.64738	0.0286029	0.0273238
GOTERM_BP	GO:0045879~negative regulation of smoothened signaling pathway	7	0.000862057	-3.06446	sox11a, sox4b, cdon, sox11b, rfx4, sox4a, rest	1036	16	13373	5.64738	0.0286029	0.0273238
GOTERM_BP	GO:0007399~nervous system development	137	0.000873771	-3.0586	adgrg1, boc, her15.1, cenpf, sema3fb, dvl2, per1b, neo1a, spry4, foxn4, otpb, e2f8, angpt1, cdkn1ca, asphd1, hmgcs1, gli1, dcdc2b, gnrh3, pcsk9, notch1b, smo, si:ch211-195b13.1, kif26ab, mmp2, wnt3a, wnt7bb, id3, kif26bb, tuba8l3, npas4a, cyfip1, mafba, sema6d, wls, acanb, tnfrsf19, jag1b, dpysl2b, ascl1b, kctd12.1, sema3gb, cnp, tsen54, chac1, lama1, sox3, sema4e, tnfrsf1b, her9, adgrg6, slc7a7,…	1036	1360	13373	1.30032	0.0286029	0.0273238
GOTERM_BP	GO:0045934~negative regulation of nucleobase-containing compound metabolic process	40	0.000885495	-3.05281	id3, junba, rel, erf, nab2, cry1bb, osr1, uhrf1, cry1ab, hist1h2a11, skilb, bhlhe40, cipcb, nab1a, e2f8, sox21b, bhlhe41, hist1h2a10, si:ch211-132b12.7, junbb, hist1h2a4, cry1ba, cry-dash, foxd3, gfi1ab, cipca, hist1h2a4, insm1a, hist1h2a11, arntl1a, cry2, cry4, ccnd1, jund, fezf2, bcl6b, si:ch211-113a14.11, hist1h2a4, zgc:154164, hist1h2a4	1036	299	13373	1.72686	0.0286029	0.0273238
GOTERM_BP	GO:0048534~hematopoietic or lymphoid organ development	46	0.000925237	-3.03375	rtkn2a, cd79b, irf8, cdca7a, cbfb, f11r.1, spi1b, emilin1a, tert, f2r, jak3, snrkb, fgf1a, spry4, jam2a, casp3a, mcm2, rgs18, tnfrsf1b, myb, slc7a7, fbxo5, gfi1ab, stat1b, notch1b, dlc, nfil3, abcc5, csf3r, tmem178, dld, dnmt3bb.1, csf1ra, ephx2, si:ch211-214p13.9, fosab, spi1a, chrd, casp8, notch1a, yap1, bcl6b, zgc:194469, csrnp1a, gna13b, wnt5b	1036	360	13373	1.64939	0.0294197	0.0281041
GOTERM_BP	GO:0009968~negative regulation of signal transduction	36	0.000976291	-3.01042	lzts2a, mylipb, ada, ajuba, nkd1, sox4a, mcl1a, nkd2a, skilb, rtn4rl2b, spry4, mcl1b, jupa, errfi1a, chac1, rfx4, ptk7a, rest, sox11a, dkk3a, rgs3a, rtn4rl2a, sox4b, cdon, sox11b, rtn4r, foxc1a, dkk2, tcf7l1a, trabd2a, tnfaip8l1, dcn, chrd, rnf152, rasa4, dusp6	1036	261	13373	1.78046	0.0305654	0.0291986
GOTERM_BP	GO:0048937~lateral line nerve glial cell development	5	0.00103241	-2.98615	adgrg6, erbb3b, foxd3, erbb2, egr2b	1036	7	13373	9.22022	0.0318326	0.0304091
GOTERM_BP	GO:0006694~steroid biosynthetic process	12	0.00106922	-2.97093	sqlea, hmgcra, nsdhl, msmo1, fgf1a, cyp51, hsd17b12a, sc5d, apoeb, cyb5r2, hsd3b7, ch25h	1036	49	13373	3.16122	0.0324756	0.0310234
GOTERM_BP	GO:0048884~neuromast development	13	0.00117719	-2.92915	dcdc2b, rtn4rl2a, shroom3, dkk2, tnfrsf19, cd74a, smad5, edn1, erbb2, s1pr2, rgs18, cd74b, wnt5b	1036	57	13373	2.944	0.0347185	0.033166
GOTERM_BP	GO:0001945~lymph vessel development	13	0.00117719	-2.92915	junba, pkd1a, notch2, mafba, notch1b, smad5, mmp2, pkd2, e2f8, pkd1b, itga9, junbb, wnt5b	1036	57	13373	2.944	0.0347185	0.033166
GOTERM_BP	GO:0002520~immune system development	46	0.00127649	-2.89398	rtkn2a, cd79b, irf8, cdca7a, cbfb, f11r.1, spi1b, emilin1a, tert, f2r, jak3, snrkb, fgf1a, spry4, jam2a, casp3a, mcm2, rgs18, tnfrsf1b, myb, slc7a7, fbxo5, gfi1ab, stat1b, notch1b, dlc, nfil3, abcc5, csf3r, tmem178, dld, dnmt3bb.1, csf1ra, ephx2, si:ch211-214p13.9, fosab, spi1a, chrd, casp8, notch1a, yap1, bcl6b, zgc:194469, csrnp1a, gna13b, wnt5b	1036	366	13373	1.62235	0.0360006	0.0343908
GOTERM_BP	GO:0002244~hematopoietic progenitor cell differentiation	12	0.0012766	-2.89394	f2r, csf3r, dld, tnfrsf1b, dnmt3bb.1, cdca7a, ephx2, fosab, f11r.1, notch1a, notch1b, dlc	1036	50	13373	3.09799	0.0360006	0.0343908
GOTERM_BP	GO:0009615~response to virus	12	0.0012766	-2.89394	ifit11, ifit16, mxa, tlr3, pkz, ifit10, mxe, CR759879.1, mxc, atf3, ifit8, mxb	1036	50	13373	3.09799	0.0360006	0.0343908
GOTERM_BP	GO:0007067~mitotic nuclear division	25	0.00129142	-2.88893	lzts2a, mis12, kif11, bub1, snx18b, cep57l1, cdca8, ncapd2, mcl1a, smc2, ska1, mybl2b, mcl1b, cenpe, ncapg, snx33, mad2l1, si:dkey-25o16.4, fbxo5, nek8, ercc6l, ncapd3, dsn1, rcc2, kif23	1036	160	13373	2.01692	0.0360006	0.0343908
GOTERM_BP	GO:0060026~convergent extension	23	0.00131767	-2.88019	fzd2, fzd7b, lzts2a, mmp14a, vangl2, pfn1, ier2a, gpc4, snai1b, mcamb, dvl2, tax1bp3, smad5, fzd7a, mmp14b, dcn, chrd, dvl3a, wnt3a, s1pr2, ptk7a, gna13b, wnt5b	1036	142	13373	2.09078	0.036236	0.0346156
GOTERM_BP	GO:0009792~embryo development ending in birth or egg hatching	56	0.00136037	-2.86634	susd4, gli2a, gadd45ba, pdgfra, her15.1, bmp3, prdm5, macc1, dvl2, lrp5, dla, smad5, neo1a, gart, s1pr2, gli1, mmp14a, myb, vangl2, gli2b, zic5, smo, fn1a, tcf7l1a, ponzr1, tfap2a, egr1, chrd, wnt3a, igf2a, pdlim7, fsta, nkd1, wls, mcl1a, mcm5, zic2b, pdgfrb, camk1db, ascl1b, mcl1b, dvl3a, pkn2, rest, shroom3, ndnf, gpc4, tfap2c, foxc1a, dlc, neurod4, gadd45bb, dld, edn1, notch1a, wnt5b	1036	471	13373	1.53474	0.0367813	0.0351365
GOTERM_BP	GO:1901532~regulation of hematopoietic progenitor cell differentiation	6	0.00137365	-2.86212	f2r, csf3r, tnfrsf1b, dnmt3bb.1, cdca7a, f11r.1	1036	12	13373	6.45415	0.0367813	0.0351365
GOTERM_BP	GO:0031101~fin regeneration	14	0.00143087	-2.8444	acanb, cxcr4b, notch1b, jag1b, esco2, hapln1a, lamb1a, erbb3b, erbb2, col1a1a, yap1, lfng, junbb, wnt5b	1036	66	13373	2.73812	0.0378159	0.0361249
GOTERM_BP	GO:0010648~negative regulation of cell communication	36	0.00155728	-2.80763	lzts2a, mylipb, ada, ajuba, nkd1, sox4a, mcl1a, nkd2a, skilb, rtn4rl2b, spry4, mcl1b, jupa, errfi1a, chac1, rfx4, ptk7a, rest, sox11a, dkk3a, rgs3a, rtn4rl2a, sox4b, cdon, sox11b, rtn4r, foxc1a, dkk2, tcf7l1a, trabd2a, tnfaip8l1, dcn, chrd, rnf152, rasa4, dusp6	1036	268	13373	1.73395	0.0406291	0.0388122
GOTERM_BP	GO:0030097~hemopoiesis	44	0.0015812	-2.80101	rtkn2a, cd79b, irf8, cdca7a, cbfb, f11r.1, spi1b, emilin1a, tert, f2r, jak3, snrkb, fgf1a, spry4, casp3a, rgs18, tnfrsf1b, myb, slc7a7, fbxo5, gfi1ab, stat1b, notch1b, dlc, nfil3, abcc5, csf3r, tmem178, dld, dnmt3bb.1, csf1ra, ephx2, si:ch211-214p13.9, fosab, spi1a, chrd, casp8, notch1a, yap1, bcl6b, zgc:194469, csrnp1a, gna13b, wnt5b	1036	349	13373	1.62741	0.040731	0.0389096
GOTERM_BP	GO:0021536~diencephalon development	15	0.00164302	-2.78436	gli2a, gli2b, dlb, wls, smo, dla, ascl1a, otpb, dmrta2, kctd12.1, fezf2, notch1a, wnt3a, csrnp1b, gli1	1036	75	13373	2.58166	0.0417892	0.0399205
GOTERM_BP	GO:0007420~brain development	52	0.00166335	-2.77902	gli2a, her15.1, cenpf, dvl2, dla, scinla, spry4, lamb1a, otpb, dmrta2, angpt1, asphd1, gli1, sox11a, vangl2, gnrh3, gli2b, zic5, sox11b, nes, cxcr4b, notch1b, smo, fn1a, tcf7l1a, tfap2a, wnt3a, fsta, npas4a, mafba, wls, marcksa, dpysl2b, zic2b, bdnf, ascl1a, ascl1b, kctd12.1, tsen54, atp1a3b, csrnp1b, met, lama1, tnfrsf1b, ap1m2, cdipt, dlb, egr2b, tgif1, fezf2, notch1a, yap1	1036	433	13373	1.55019	0.0417892	0.0399205
GOTERM_BP	GO:0055016~hypochord development	4	0.00174234	-2.75887	dla, lamb1a, notch1a, lfng	1036	4	13373	12.9083	0.0432398	0.0413062
GOTERM_BP	GO:0032963~collagen metabolic process	5	0.00193846	-2.71254	pkd1a, pkd2, p3h2, pkd1b, p3h3	1036	8	13373	8.06769	0.0475274	0.0454021
GOTERM_BP	GO:0016126~sterol biosynthetic process	9	0.00197984	-2.70337	sqlea, hmgcra, msmo1, fgf1a, cyp51, sc5d, apoeb, cyb5r2, ch25h	1036	31	13373	3.74757	0.047964	0.0458192
GOTERM_BP	GO:1903706~regulation of hemopoiesis	10	0.00201786	-2.69511	f2r, csf3r, irf8, tnfrsf1b, tmem178, dnmt3bb.1, cdca7a, spi1a, f11r.1, spi1b	1036	38	13373	3.39692	0.0483099	0.0461496
GOTERM_BP	GO:0072358~cardiovascular system development	86	0.00211524	-2.67464	junba, pdgfra, amot, ajuba, kif11, foxj1a, cenpf, tie1, f2r, dla, npr3, smad5, fgf1a, e2f8, foxn4, lpar6a, erbb2, angpt1, s1pr2, slc2a12, pak2a, fli1b, fzd2, csad, hspg2, xirp2a, armc4, arhgef9b, snai1b, notch1b, smo, fn1a, tcf7l1a, nfil3, esco2, mmp2, fmnl3, chrd, robo4, pkd1b, dab2, pdlim7, srpx2, rbfox1l, pkd1a, crip2, notch2, nkd1, mafba, foxc1b, cdca8, tnfrsf19, osr1, fosl2, pdgfrb, cemip2, …	1036	809	13373	1.37221	0.0493611	0.0471538
GOTERM_BP	GO:0072359~circulatory system development	86	0.00211524	-2.67464	junba, pdgfra, amot, ajuba, kif11, foxj1a, cenpf, tie1, f2r, dla, npr3, smad5, fgf1a, e2f8, foxn4, lpar6a, erbb2, angpt1, s1pr2, slc2a12, pak2a, fli1b, fzd2, csad, hspg2, xirp2a, armc4, arhgef9b, snai1b, notch1b, smo, fn1a, tcf7l1a, nfil3, esco2, mmp2, fmnl3, chrd, robo4, pkd1b, dab2, pdlim7, srpx2, rbfox1l, pkd1a, crip2, notch2, nkd1, mafba, foxc1b, cdca8, tnfrsf19, osr1, fosl2, pdgfrb, cemip2, …	1036	809	13373	1.37221	0.0493611	0.0471538
GOTERM_BP	GO:0000819~sister chromatid segregation	14	0.00217998	-2.66155	mad2l1, si:dkey-25o16.4, mis12, bub1, cep57l1, cdca8, ncapd2, smc2, esco2, ncapd3, dsn1, cenpe, ncapg, kif23	1036	69	13373	2.61908	0.0493611	0.0471538
GOTERM_BP	GO:2000113~negative regulation of cellular macromolecule biosynthetic process	49	0.00218305	-2.66094	junba, ajuba, itm2cb, mov10b.2, bhlhe40, cipcb, dre-mir-132-1, nab1a, e2f8, sox21b, bhlhe41, si:ch211-132b12.7, hist1h2a10, hist1h2a4, cry1ba, cry-dash, dre-mir-212, cipca, sb:cb81, hist1h2a11, cry2, arntl1a, cry4, ccnd1, jund, si:ch211-113a14.11, hist1h2a4, zgc:154164, id3, zfp36l1a, rel, erf, nab2, cry1bb, osr1, uhrf1, cry1ab, skilb, hist1h2a11, junbb, foxd3, gfi1ab, zgc:114130, hist1h2a4, mov1…	1036	407	13373	1.55407	0.0493611	0.0471538
GOTERM_BP	GO:0010558~negative regulation of macromolecule biosynthetic process	49	0.00218305	-2.66094	junba, ajuba, itm2cb, mov10b.2, bhlhe40, cipcb, dre-mir-132-1, nab1a, e2f8, sox21b, bhlhe41, si:ch211-132b12.7, hist1h2a10, hist1h2a4, cry1ba, cry-dash, dre-mir-212, cipca, sb:cb81, hist1h2a11, cry2, arntl1a, cry4, ccnd1, jund, si:ch211-113a14.11, hist1h2a4, zgc:154164, id3, zfp36l1a, rel, erf, nab2, cry1bb, osr1, uhrf1, cry1ab, skilb, hist1h2a11, junbb, foxd3, gfi1ab, zgc:114130, hist1h2a4, mov1…	1036	407	13373	1.55407	0.0493611	0.0471538
GOTERM_BP	GO:0035270~endocrine system development	16	0.0023055	-2.63724	fzd2, gli2a, sox4b, gli2b, foxc1a, smo, jag1b, fn1a, insm1a, ascl1a, ascl1b, bhmt, dmrta2, jag1a, gli1, wnt5b	1036	86	13373	2.40154	0.051557	0.0492515
GOTERM_BP	GO:0003401~axis elongation	10	0.00244625	-2.6115	tax1bp3, stk25a, vangl2, fgf1a, dcn, dvl3a, gpc4, ptk7a, wnt5b, dvl2	1036	39	13373	3.30982	0.0541099	0.0516902
GOTERM_BP	GO:0031327~negative regulation of cellular biosynthetic process	50	0.00259186	-2.58639	junba, ajuba, itm2cb, mov10b.2, bhlhe40, cipcb, dre-mir-132-1, nab1a, e2f8, sox21b, bhlhe41, si:ch211-132b12.7, hist1h2a10, hist1h2a4, cry1ba, cry-dash, dre-mir-212, cipca, sb:cb81, hist1h2a11, cry2, arntl1a, cry4, ccnd1, jund, si:ch211-113a14.11, hist1h2a4, zgc:154164, id3, zfp36l1a, rel, erf, nab2, cry1bb, osr1, uhrf1, cry1ab, skilb, hist1h2a11, junbb, ormdl3, foxd3, gfi1ab, zgc:114130, hist1h2…	1036	421	13373	1.53305	0.0567144	0.0541783
GOTERM_BP	GO:0048705~skeletal system morphogenesis	24	0.00282988	-2.54823	inka1a, mmp14a, pdgfra, notch2, foxd3, ndnf, bmp3, prdm5, macc1, wls, lrp5, smo, jag1b, fn1a, zic2b, pdgfrb, ponzr1, tfap2a, egr1, edn1, s1pr2, pkn2, fsta, wnt5b	1036	160	13373	1.93625	0.0612638	0.0585243
GOTERM_BP	GO:0000070~mitotic sister chromatid segregation	13	0.00289243	-2.53874	mad2l1, si:dkey-25o16.4, mis12, bub1, cep57l1, cdca8, ncapd2, smc2, ncapd3, dsn1, cenpe, ncapg, kif23	1036	63	13373	2.66362	0.0619588	0.0591882
GOTERM_BP	GO:0061386~closure of optic fissure	6	0.00304692	-2.51614	sox11a, sfrp1a, sox4b, sox11b, foxc1a, sox4a	1036	14	13373	5.53213	0.0645884	0.0617001
GOTERM_BP	GO:0061053~somite development	21	0.00333967	-2.4763	gli2a, gadd45ba, rgs3a, vangl2, nkd1, her15.1, gpc4, foxc1a, dlc, fn1a, gadd45bb, dld, neo1a, lamb1a, chrd, notch1a, wnt3a, igf2a, pdlim7, wnt5b, lama1	1036	134	13373	2.02294	0.0700642	0.0669311
GOTERM_BP	GO:0000280~nuclear division	30	0.00351497	-2.45408	lzts2a, trip13, mis12, kif11, bub1, snx18b, cep57l1, cdca8, ncapd2, mcl1a, smc2, ska1, mybl2b, mcl1b, cenpe, ncapg, snx33, mad2l1, si:dkey-25o16.4, fbxo5, si:dkey-57a22.11, nek8, ercc6l, rad51b, ncapd3, sass6, kif20bb, dsn1, rcc2, kif23	1036	221	13373	1.75226	0.0723083	0.0690749
GOTERM_BP	GO:0051607~defense response to virus	10	0.0035177	-2.45374	ifit11, ifit16, mxa, tlr3, ifit10, mxe, CR759879.1, mxc, ifit8, mxb	1036	41	13373	3.14837	0.0723083	0.0690749
GOTERM_BP	GO:0000902~cell morphogenesis	73	0.00385605	-2.41386	cdc7, gli2a, boc, ier2a, foxj1a, csnk1db, sema3fb, f2r, ehd1b, neo1a, e2f8, lamb1a, erbb2, hs3st1l2, casp3a, gli1, mmp25b, fzd2, mmp14a, myb, vangl2, cdc42se2, cxcr4b, slit1a, notch1b, smo, fn1a, si:ch211-195b13.1, kif26ab, mmp2, tfap2a, fmnl3, robo4, lect2l, CABZ01055306.1, kif26bb, fmnl1a, cyfip1, ttll6, nyap2b, sema6d, wipf1b, dpysl2b, bdnf, prrx1a, kctd12.1, sema3gb, rfx4, rest, lama1, sema4e…	1036	681	13373	1.38371	0.0784705	0.0749615
GOTERM_BP	GO:0021523~somatic motor neuron differentiation	4	0.00410471	-2.38672	gli2a, dld, notch1a, smo	1036	5	13373	10.3266	0.0827038	0.0790055
GOTERM_BP	GO:0016125~sterol metabolic process	11	0.00508735	-2.29351	sqlea, ebp, hmgcra, msmo1, fgf1a, cyp51, sc5d, apoeb, cyb5r2, insig1, ch25h	1036	51	13373	2.78414	0.101498	0.0969588
GOTERM_BP	GO:0030111~regulation of Wnt signaling pathway	18	0.00549002	-2.26043	lzts2a, dkk3a, mylipb, rgs3a, vangl2, nkd1, prdm5, dkk2, nkd2a, lrp5, tcf7l1a, tax1bp3, trabd2a, sfrp1a, sybu, jupa, ptk7a, wnt5b	1036	112	13373	2.07455	0.108468	0.103618
GOTERM_BP	GO:0001568~blood vessel development	44	0.00569101	-2.24481	amot, kif11, foxc1b, tnfrsf19, tie1, osr1, dla, pdgfrb, smad5, fgf1a, e2f8, lpar6a, angpt1, per2, pak2a, fli1b, lama1, angpt4, phkg1a, adgrb1b, hspg2, adgrg6, arhgef9b, pappa2, ism1, foxc1a, mcamb, notch1b, smo, dlc, fn1a, ptprja, mt2, ephx2, fmnl3, robo4, crb2b, notch1a, dab2, efna1b, ntn4, srpx2, gna13b, wnt5b	1036	374	13373	1.51862	0.111358	0.106378
GOTERM_BP	GO:0021984~adenohypophysis development	6	0.00583685	-2.23382	gli2a, ascl1a, dmrta2, gli2b, smo, gli1	1036	16	13373	4.84061	0.113124	0.108065
GOTERM_BP	GO:0031076~embryonic camera-type eye development	10	0.00673785	-2.17148	sox11a, tcf7l1a, sfrp1a, sox4b, sox11b, nes, foxc1a, smoc1, sox4a, smo	1036	45	13373	2.86851	0.128145	0.122415
GOTERM_BP	GO:0021517~ventral spinal cord development	10	0.00673785	-2.17148	dla, gli2a, dld, foxn4, notch1a, met, notch1b, smo, gli1, dlc	1036	45	13373	2.86851	0.128145	0.122415
GOTERM_BP	GO:0048468~cell development	111	0.00711982	-2.14753	adgrg1, trip13, tgfbi, boc, inhbab, sema3fb, lrp5, neo1a, spry4, otpb, e2f8, hmgcs1, gli1, dcdc2b, notch1b, smo, nfil3, si:ch211-195b13.1, kif26ab, mmp2, rbfox1l, kif26bb, tmod1, tuba8l3, cyfip1, sema6d, tnfrsf19, jag1b, dpysl2b, ascl1b, prrx1a, kctd12.1, sema3gb, cnp, tgfb2l, lama1, sox3, sema4e, anln, her9, adgrg6, slc7a7, cdon, clcf1, gpc4, tcap, rtn4r, gfi1ab, foxc1a, mstna, egr2b, dlc, crb2b…	1036	1135	13373	1.2624	0.134156	0.128157
GOTERM_BP	GO:2000050~regulation of non-canonical Wnt signaling pathway	5	0.00756984	-2.12091	rgs3a, vangl2, prdm5, ptk7a, wnt5b	1036	11	13373	5.86741	0.13878	0.132575
GOTERM_BP	GO:0001840~neural plate development	5	0.00756984	-2.12091	vangl2, nkd1, notch1a, smo, neurod4	1036	11	13373	5.86741	0.13878	0.132575
GOTERM_BP	GO:0048892~lateral line nerve development	5	0.00756984	-2.12091	adgrg6, erbb3b, foxd3, erbb2, egr2b	1036	11	13373	5.86741	0.13878	0.132575
GOTERM_BP	GO:0048938~lateral line nerve glial cell morphogenesis involved in differentiation	4	0.00773803	-2.11137	adgrg6, erbb3b, erbb2, egr2b	1036	6	13373	8.60553	0.139566	0.133325
GOTERM_BP	GO:0021983~pituitary gland development	6	0.00774984	-2.11071	gli2a, ascl1a, dmrta2, gli2b, smo, gli1	1036	17	13373	4.55587	0.139566	0.133325
GOTERM_BP	GO:0001756~somitogenesis	17	0.00800698	-2.09653	gli2a, gadd45ba, vangl2, nkd1, her15.1, gpc4, foxc1a, dlc, fn1a, gadd45bb, dld, neo1a, chrd, notch1a, wnt3a, igf2a, pdlim7	1036	107	13373	2.05085	0.142932	0.13654
GOTERM_BP	GO:0030900~forebrain development	19	0.00821458	-2.08541	gli2a, npas4a, gli2b, dlb, cxcr4b, wls, smo, dla, tcf7l1a, ascl1a, otpb, tgif1, dmrta2, kctd12.1, fezf2, notch1a, wnt3a, csrnp1b, gli1	1036	126	13373	1.94649	0.145362	0.138862
GOTERM_BP	GO:0030903~notochord development	12	0.00838422	-2.07654	dla, col2a1a, vangl2, lamb1a, fas, pappa2, gpc4, wnt3a, igf2a, egfl6, lama1, fstl1a	1036	63	13373	2.45872	0.147085	0.140508
GOTERM_BP	GO:0001946~lymphangiogenesis	9	0.00890512	-2.05036	pkd1a, notch2, pkd2, e2f8, mafba, pkd1b, itga9, notch1b, wnt5b	1036	39	13373	2.97884	0.154888	0.147962
GOTERM_BP	GO:0098813~nuclear chromosome segregation	16	0.00976851	-2.01017	mad2l1, si:dkey-25o16.4, trip13, mis12, bub1, cep57l1, cdca8, ncapd2, si:dkey-57a22.11, smc2, esco2, ncapd3, dsn1, cenpe, ncapg, kif23	1036	100	13373	2.06533	0.168056	0.160541
GOTERM_BP	GO:0051960~regulation of nervous system development	30	0.00985265	-2.00645	gli2a, adgrg1, sema6d, sema3fb, dvl2, dpysl2b, bdnf, ascl1a, dre-mir-132-1, ascl1b, kctd12.1, dvl3a, sema3gb, rfx4, casp3a, lfng, gli1, sema4e, her9, zic5, cdon, clcf1, gfi1ab, cxcr4b, slit1a, btbd6a, neurod4, apoeb, notch1a, bcl6b	1036	238	13373	1.6271	0.168056	0.160541
GOTERM_BP	GO:0042074~cell migration involved in gastrulation	14	0.00993359	-2.00289	lzts2a, mmp14a, apoc1, vangl2, gpc4, snai1b, pcdh18a, smad5, fzd7a, mmp14b, chrd, s1pr2, gna13b, wnt5b	1036	82	13373	2.20386	0.168056	0.160541
GOTERM_BP	GO:0030178~negative regulation of Wnt signaling pathway	11	0.00999249	-2.00033	tcf7l1a, trabd2a, lzts2a, dkk3a, mylipb, rgs3a, nkd1, jupa, ptk7a, dkk2, nkd2a	1036	56	13373	2.53556	0.168056	0.160541
GOTERM_BP	GO:0060900~embryonic camera-type eye formation	7	0.0104566	-1.98061	sox11a, sfrp1a, sox4b, sox11b, foxc1a, smoc1, sox4a	1036	25	13373	3.61432	0.173002	0.165266
GOTERM_BP	GO:0060872~semicircular canal development	7	0.0104566	-1.98061	jag1b, arf1, adgrg6, s1pr2, wls, otx1, smo	1036	25	13373	3.61432	0.173002	0.165266
GOTERM_BP	GO:0021915~neural tube development	15	0.0108842	-1.9632	gli2a, vangl2, shroom3, zic5, gli2b, wls, dvl2, smo, dla, tcf7l1a, neo1a, dvl3a, wnt3a, rest, gli1	1036	92	13373	2.10461	0.178624	0.170637
GOTERM_BP	GO:0035282~segmentation	18	0.0117632	-1.92948	gli2a, gadd45ba, vangl2, nkd1, her15.1, gpc4, foxc1a, dlc, fn1a, gadd45bb, dld, neo1a, chrd, notch1a, wnt3a, igf2a, pdlim7, ptk7a	1036	121	13373	1.92024	0.191505	0.182941
GOTERM_BP	GO:0030855~epithelial cell differentiation	21	0.0125294	-1.90207	anln, dcdc2b, shroom3, foxc1a, tnfrsf19, dlc, osr1, smo, jag1b, fn1a, tcf7l1a, insm1a, ascl1a, wt1b, bhmt, rilpl2, e2f8, crb2b, errfi1a, s1pr2, casp3a	1036	151	13373	1.79519	0.198331	0.189462
GOTERM_BP	GO:0007422~peripheral nervous system development	11	0.0127377	-1.89491	sox3, adgrg6, tfap2a, her4.2, erbb3b, foxd3, erbb2, notch1a, gfi1ab, rtn4r, notch1b	1036	58	13373	2.44813	0.198331	0.189462
GOTERM_BP	GO:0061300~cerebellum vasculature development	4	0.0127673	-1.8939	pdgfrb, pdgfra, foxc1b, foxc1a	1036	7	13373	7.37617	0.198331	0.189462
GOTERM_BP	GO:0001839~neural plate morphogenesis	4	0.0127673	-1.8939	vangl2, nkd1, smo, neurod4	1036	7	13373	7.37617	0.198331	0.189462
GOTERM_BP	GO:0007076~mitotic chromosome condensation	4	0.0127673	-1.8939	smc2, ncapd3, ncapd2, ncapg	1036	7	13373	7.37617	0.198331	0.189462
GOTERM_BP	GO:1902036~regulation of hematopoietic stem cell differentiation	4	0.0127673	-1.8939	f2r, dnmt3bb.1, cdca7a, f11r.1	1036	7	13373	7.37617	0.198331	0.189462
GOTERM_BP	GO:0001525~angiogenesis	32	0.0129661	-1.88719	amot, kif11, tnfrsf19, tie1, dla, pdgfrb, fgf1a, e2f8, lpar6a, angpt1, per2, fli1b, angpt4, phkg1a, adgrb1b, hspg2, adgrg6, arhgef9b, pappa2, ism1, mcamb, fn1a, mt2, fmnl3, robo4, crb2b, notch1a, dab2, efna1b, srpx2, gna13b, wnt5b	1036	264	13373	1.56464	0.199894	0.190956
GOTERM_BP	GO:0021510~spinal cord development	12	0.0132089	-1.87913	dla, tcf7l1a, gli2a, dld, foxn4, notch1a, rfx4, met, notch1b, smo, gli1, dlc	1036	67	13373	2.31193	0.202106	0.193069
GOTERM_BP	GO:0010564~regulation of cell cycle process	17	0.0143819	-1.84218	rock2b, mad2l1, fanci, si:dkey-25o16.4, rock2bl, tpx2, psme1, bub1, fbxo5, ccna2, mcl1a, insm1a, e2f8, mcl1b, kif20bb, ccnd1, rgcc	1036	114	13373	1.92492	0.218412	0.208645
GOTERM_BP	GO:0002011~morphogenesis of an epithelial sheet	13	0.0147541	-1.83109	sox11a, fzd7b, pfn1, sox4b, sox11b, pcdh18a, foxc1a, sox4a, sox19b, fzd7a, sfrp1a, fzd10, gna13b	1036	77	13373	2.17932	0.222404	0.212458
GOTERM_BP	GO:0060348~bone development	7	0.0153144	-1.8149	jag1b, notch2, csf1ra, foxd3, edn1, ctsk, phospho1	1036	27	13373	3.3466	0.227481	0.217309
GOTERM_BP	GO:0060973~cell migration involved in heart development	7	0.0153144	-1.8149	fn1a, cemip2, erbb2, s1pr2, snai1b, hspb7, gna13b	1036	27	13373	3.3466	0.227481	0.217309
GOTERM_BP	GO:0000904~cell morphogenesis involved in differentiation	45	0.0154297	-1.81164	gli2a, kif26bb, boc, cyfip1, sema6d, sema3fb, f2r, dpysl2b, prrx1a, neo1a, e2f8, lamb1a, kctd12.1, erbb2, sema3gb, casp3a, rest, mmp25b, gli1, lama1, sema4e, grna, lingo4b, mmp14a, adgrg6, rbpms2b, tfap2c, rtn4r, cxcr4b, slit1a, egr2b, notch1b, smo, fn1a, kif26ab, mmp2, tfap2a, rilpl2, her4.2, erbb3b, robo4, fezf2, apoeb, notch1a, efna1b	1036	408	13373	1.42371	0.227532	0.217357
GOTERM_BP	GO:0007411~axon guidance	25	0.0158436	-1.80015	gli2a, kif26bb, boc, sema6d, sema3fb, dpysl2b, neo1a, e2f8, lamb1a, sema3gb, rest, mmp25b, gli1, lama1, sema4e, mmp14a, rtn4r, cxcr4b, slit1a, smo, kif26ab, mmp2, robo4, fezf2, efna1b	1036	195	13373	1.65491	0.231955	0.221583
GOTERM_BP	GO:0097485~neuron projection guidance	25	0.016778	-1.77526	gli2a, kif26bb, boc, sema6d, sema3fb, dpysl2b, neo1a, e2f8, lamb1a, sema3gb, rest, mmp25b, gli1, lama1, sema4e, mmp14a, rtn4r, cxcr4b, slit1a, smo, kif26ab, mmp2, robo4, fezf2, efna1b	1036	196	13373	1.64647	0.242337	0.231501
GOTERM_BP	GO:0032965~regulation of collagen biosynthetic process	3	0.0170291	-1.76881	pkd1a, pkd2, pkd1b	1036	3	13373	12.9083	0.242337	0.231501
GOTERM_BP	GO:0060079~excitatory postsynaptic potential	3	0.0170291	-1.76881	CR388166.1, npas4a, npffl	1036	3	13373	12.9083	0.242337	0.231501
GOTERM_BP	GO:0010712~regulation of collagen metabolic process	3	0.0170291	-1.76881	pkd1a, pkd2, pkd1b	1036	3	13373	12.9083	0.242337	0.231501
GOTERM_BP	GO:0021515~cell differentiation in spinal cord	10	0.0172479	-1.76326	dla, gli2a, dld, foxn4, notch1a, met, notch1b, smo, gli1, dlc	1036	52	13373	2.48237	0.243746	0.232847
GOTERM_BP	GO:0042742~defense response to bacterium	16	0.017606	-1.75434	dram1, hist1h2a11, hist1h2a3, marco, hist1h2a4, hist1h2a11, mpeg1.1, hist1h2a11, hist1h2a11, si:ch211-113a14.11, hist1h2a4, nod1, hist1h2a11, hist1h2a4, hist1h2a4, tlr9	1036	107	13373	1.93021	0.247092	0.236042
GOTERM_BP	GO:0009952~anterior/posterior pattern specification	25	0.0177554	-1.75067	gli2a, gadd45ba, nkd1, her15.1, mafba, wls, neo1a, mmp14b, rgs18, mmp14a, vangl2, gpc4, foxc1a, smo, dlc, fn1a, gadd45bb, tcf7l1a, dld, tgif1, chrd, notch1a, wnt3a, igf2a, pdlim7	1036	197	13373	1.63811	0.247481	0.236414
GOTERM_BP	GO:0035556~intracellular signal transduction	116	0.0179158	-1.74676	gadd45ba, prkcdb, tead1a, rhobtb1, ajuba, inhbab, dvl2, sh3bp5la, snrkb, plcd4b, fgf1a, spry4, arhgef2, dcdc2b, gucy2d, rock2bl, rtn4rl2a, asb5b, rrad, arhgap31, tradd, si:ch211-195b13.1, adcy3b, asb2a.1, rasa4, bbc3, MYO9B, plekhg4, racgap1, znf385a, irak1, cart2, si:ch73-139e5.4, tnfrsf19, mcl1a, blnk, rtn4rl2b, RASGRP2, ascl1b, pkd2, tgfb2l, dclk1a, rock2b, tnfrsf1b, si:dkeyp-26a9.2, rasd1, dg…	1036	1231	13373	1.21638	0.248018	0.236927
GOTERM_BP	GO:0072009~nephron epithelium development	9	0.0182397	-1.73898	anln, wt1b, ponzr1, fgf1a, pkd2, shroom3, crb2b, foxc1a, osr1	1036	44	13373	2.64033	0.250796	0.239581
GOTERM_BP	GO:0048704~embryonic skeletal system morphogenesis	20	0.0186497	-1.72933	mmp14a, pdgfra, ndnf, bmp3, prdm5, macc1, wls, lrp5, smo, fn1a, zic2b, pdgfrb, ponzr1, tfap2a, egr1, edn1, s1pr2, pkn2, fsta, wnt5b	1036	147	13373	1.75623	0.254057	0.242696
GOTERM_BP	GO:0048596~embryonic camera-type eye morphogenesis	8	0.0187266	-1.72754	sox11a, tcf7l1a, sfrp1a, sox4b, sox11b, foxc1a, smoc1, sox4a	1036	36	13373	2.86851	0.254057	0.242696
GOTERM_BP	GO:2000145~regulation of cell motility	22	0.0196411	-1.70683	sema4e, rtn4rl2a, nkd1, foxj1a, gpc4, sema6d, rac2, anxa5b, cxcr4b, sema3fb, tnfrsf19, inpp5d, mt2, smad5, csf1ra, mmp14b, fgf1a, robo4, s1pr2, sema3gb, wasb, lama1	1036	168	13373	1.69037	0.2647	0.252863
GOTERM_BP	GO:0048839~inner ear development	21	0.0198121	-1.70307	sox3, ptprq, dcdc2b, adgrg6, vangl2, tfap2c, wls, otx1, smo, cd74a, jag1b, dla, arf1, smad5, tfap2a, chrd, s1pr2, rgs18, cd74b, fsta, wnt5b	1036	158	13373	1.71566	0.265248	0.253386
GOTERM_BP	GO:0050767~regulation of neurogenesis	27	0.020008	-1.6988	gli2a, adgrg1, sema6d, sema3fb, dpysl2b, bdnf, ascl1a, dre-mir-132-1, ascl1b, kctd12.1, sema3gb, casp3a, lfng, gli1, sema4e, her9, zic5, cdon, clcf1, gfi1ab, cxcr4b, slit1a, btbd6a, neurod4, apoeb, notch1a, bcl6b	1036	220	13373	1.5842	0.26612	0.25422
GOTERM_BP	GO:0048854~brain morphogenesis	7	0.0215454	-1.66665	gli2a, tgif1, lamb1a, gli2b, tsen54, gli1, lama1	1036	29	13373	3.1158	0.283466	0.27079
GOTERM_BP	GO:0035148~tube formation	8	0.0216006	-1.66553	adgrg6, neo1a, vangl2, shroom3, zic5, dvl3a, smo, dvl2	1036	37	13373	2.79098	0.283466	0.27079
GOTERM_BP	GO:0048916~posterior lateral line development	10	0.0217301	-1.66294	smad5, rtn4rl2a, shroom3, erbb2, f11r.1, esr1, yap1, s1pr2, cxcr4b, tnfrsf19	1036	54	13373	2.39043	0.283466	0.27079
GOTERM_BP	GO:0043583~ear development	21	0.0224014	-1.64972	sox3, ptprq, dcdc2b, adgrg6, vangl2, tfap2c, wls, otx1, smo, cd74a, jag1b, dla, arf1, smad5, tfap2a, chrd, s1pr2, rgs18, cd74b, fsta, wnt5b	1036	160	13373	1.69421	0.290362	0.277378
GOTERM_BP	GO:0048048~embryonic eye morphogenesis	9	0.0234446	-1.62996	sox11a, tcf7l1a, sfrp1a, vangl2, sox4b, sox11b, foxc1a, smoc1, sox4a	1036	46	13373	2.52554	0.301961	0.288458
GOTERM_BP	GO:0006342~chromatin silencing	10	0.0242596	-1.61512	uhrf1, hist1h2a11, hist1h2a11, si:ch211-113a14.11, hist1h2a4, hist1h2a10, zgc:154164, hist1h2a4, hist1h2a4, hist1h2a4	1036	55	13373	2.34696	0.308551	0.294754
GOTERM_BP	GO:0048863~stem cell differentiation	10	0.0242596	-1.61512	f2r, fosl2, dld, dnmt3bb.1, cdca7a, fosab, f11r.1, smo, dlc, osr1	1036	55	13373	2.34696	0.308551	0.294754
GOTERM_BP	GO:0072073~kidney epithelium development	10	0.0269916	-1.56877	anln, wt1b, ponzr1, fgf1a, pkd2, shroom3, crb2b, yap1, foxc1a, osr1	1036	56	13373	2.30505	0.340263	0.325048
GOTERM_BP	GO:0002253~activation of immune response	15	0.0271664	-1.56597	cd79b, klhl6, tlr5b, tespa1, tlr3, irak1, c1qb, c1qa, tlr5a, c1qc, fpr1, si:ch211-214p13.9, skap2, unc93b1, tlr9	1036	103	13373	1.87985	0.340263	0.325048
GOTERM_BP	GO:0030182~neuron differentiation	72	0.0272545	-1.56456	gli2a, boc, sema3fb, dla, per1b, neo1a, e2f8, lamb1a, foxn4, otpb, erbb2, s1pr2, casp3a, lfng, gli1, mmp25b, sox11a, mmp14a, dcdc2b, vangl2, gli2b, sox11b, cxcr4b, slit1a, notch1b, smo, si:ch211-195b13.1, kif26ab, mmp2, tfap2a, robo4, wnt3a, wnt7bb, id3, kif26bb, rx1, nkd1, cyfip1, nyap2b, sema6d, jag1b, dpysl2b, skilb, bdnf, ascl1a, ascl1b, kctd12.1, sema3gb, cnp, rest, met, lama1, sox3, sema4e,…	1036	733	13373	1.26794	0.340263	0.325048
GOTERM_BP	GO:0031018~endocrine pancreas development	8	0.0282362	-1.54919	fzd2, gli2a, insm1a, bhmt, ascl1b, sox4b, smo, wnt5b	1036	39	13373	2.64786	0.35037	0.334702
GOTERM_BP	GO:0043049~otic placode formation	6	0.0286553	-1.54279	sox3, smad5, tfap2a, chrd, tfap2c, fsta	1036	23	13373	3.36738	0.352902	0.337121
GOTERM_BP	GO:0042472~inner ear morphogenesis	12	0.0287871	-1.5408	sox3, jag1b, smad5, dcdc2b, ptprq, adgrg6, tfap2a, chrd, tfap2c, otx1, fsta, smo	1036	75	13373	2.06533	0.352902	0.337121
GOTERM_BP	GO:0048762~mesenchymal cell differentiation	19	0.0292048	-1.53455	sema4e, foxd3, foxc1b, sema6d, tfap2c, foxc1a, sema3fb, lrp5, smo, dla, zic2b, tfap2a, prrx1a, erbb3b, edn1, erbb2, sema3gb, col18a1a, rcc2	1036	144	13373	1.70318	0.35483	0.338963
GOTERM_BP	GO:0060028~convergent extension involved in axis elongation	7	0.0292931	-1.53324	tax1bp3, vangl2, dcn, dvl3a, gpc4, wnt5b, dvl2	1036	31	13373	2.91478	0.35483	0.338963
GOTERM_BP	GO:0060485~mesenchyme development	24	0.0310573	-1.50784	sema4e, foxd3, foxc1b, sema6d, tfap2c, foxc1a, sema3fb, acta1a, dlc, lrp5, smo, dla, zic2b, dld, cemip2, tfap2a, prrx1a, lamb1a, erbb3b, edn1, erbb2, sema3gb, col18a1a, rcc2	1036	197	13373	1.57258	0.373973	0.35725
GOTERM_BP	GO:0042471~ear morphogenesis	12	0.0313969	-1.50311	sox3, jag1b, smad5, dcdc2b, ptprq, adgrg6, tfap2a, chrd, tfap2c, otx1, fsta, smo	1036	76	13373	2.03815	0.375839	0.359033
GOTERM_BP	GO:0048592~eye morphogenesis	23	0.0319187	-1.49595	sox11a, lgsn, mmp14a, rx1, vangl2, cdipt, nkd1, sox4b, sox11b, foxc1a, marcksa, sox4a, fn1a, tcf7l1a, insm1a, sfrp1a, lamb1a, foxn4, egr1, ccnd1, crb2b, pim1, smoc1	1036	187	13373	1.58765	0.379851	0.362865
GOTERM_BP	GO:0099565~chemical synaptic transmission, postsynaptic	3	0.0323159	-1.49058	CR388166.1, npas4a, npffl	1036	4	13373	9.68123	0.380132	0.363134
GOTERM_BP	GO:0048855~adenohypophysis morphogenesis	3	0.0323159	-1.49058	gli2a, gli2b, gli1	1036	4	13373	9.68123	0.380132	0.363134
GOTERM_BP	GO:0032835~glomerulus development	9	0.0330793	-1.48044	gli2a, anln, wt1b, ponzr1, shroom3, crb2b, mafba, foxc1a, osr1	1036	49	13373	2.37091	0.381834	0.364759
GOTERM_BP	GO:0045814~negative regulation of gene expression, epigenetic	10	0.0330917	-1.48028	uhrf1, hist1h2a11, hist1h2a11, si:ch211-113a14.11, hist1h2a4, hist1h2a10, zgc:154164, hist1h2a4, hist1h2a4, hist1h2a4	1036	58	13373	2.22557	0.381834	0.364759
GOTERM_BP	GO:0052547~regulation of peptidase activity	10	0.0330917	-1.48028	esco2, bbc3, tnfrsf1b, tfpia, bmf1, psme1, mcl1b, casp8, pak2a, mcl1a	1036	58	13373	2.22557	0.381834	0.364759
GOTERM_BP	GO:0072175~epithelial tube formation	7	0.033773	-1.47143	neo1a, vangl2, shroom3, zic5, dvl3a, smo, dvl2	1036	32	13373	2.82369	0.381834	0.364759
GOTERM_BP	GO:0000910~cytokinesis	7	0.033773	-1.47143	kif20a, lzts2a, e2f8, zgc:86764, fbxo5, kif23, snx33	1036	32	13373	2.82369	0.381834	0.364759
GOTERM_BP	GO:0072311~glomerular epithelial cell differentiation	6	0.0339616	-1.46901	anln, wt1b, shroom3, crb2b, foxc1a, osr1	1036	24	13373	3.22708	0.381834	0.364759
GOTERM_BP	GO:0072010~glomerular epithelium development	6	0.0339616	-1.46901	anln, wt1b, shroom3, crb2b, foxc1a, osr1	1036	24	13373	3.22708	0.381834	0.364759
GOTERM_BP	GO:0061318~renal filtration cell differentiation	6	0.0339616	-1.46901	anln, wt1b, shroom3, crb2b, foxc1a, osr1	1036	24	13373	3.22708	0.381834	0.364759
GOTERM_BP	GO:0072006~nephron development	11	0.0355095	-1.44966	gli2a, anln, wt1b, ponzr1, fgf1a, pkd2, shroom3, crb2b, mafba, foxc1a, osr1	1036	68	13373	2.08811	0.397043	0.379288
GOTERM_BP	GO:0014032~neural crest cell development	16	0.036152	-1.44187	sema4e, foxd3, foxc1b, sema6d, tfap2c, foxc1a, sema3fb, lrp5, dla, zic2b, tfap2a, erbb3b, erbb2, sema3gb, col18a1a, rcc2	1036	117	13373	1.76524	0.397724	0.379939
GOTERM_BP	GO:0048706~embryonic skeletal system development	20	0.0362529	-1.44066	mmp14a, pdgfra, ndnf, bmp3, prdm5, macc1, wls, lrp5, smo, fn1a, zic2b, pdgfrb, ponzr1, tfap2a, egr1, edn1, s1pr2, pkn2, fsta, wnt5b	1036	158	13373	1.63396	0.397724	0.379939
GOTERM_BP	GO:0009967~positive regulation of signal transduction	33	0.0367074	-1.43525	map3k5, lzts2a, bbc3, gadd45ba, tespa1, bmp3, inhbab, cart2, gdf6b, CABZ01109021.1, tnfrsf19, f2r, cart3, neo1a, fgf1a, lpar6a, tgfb2l, ccl34b.1, gli1, zak, tnfrsf1b, vangl2, fas, gpr55a, mstna, smo, tradd, zgc:153759, gadd45bb, sfrp1a, robo4, pik3r5, bmp7b	1036	298	13373	1.42944	0.397724	0.379939
GOTERM_BP	GO:0002761~regulation of myeloid leukocyte differentiation	4	0.036743	-1.43482	irf8, tmem178, spi1a, spi1b	1036	10	13373	5.16332	0.397724	0.379939
GOTERM_BP	GO:0003179~heart valve morphogenesis	4	0.036743	-1.43482	cemip2, jupa, slc2a12, pdlim7	1036	10	13373	5.16332	0.397724	0.379939
GOTERM_BP	GO:0045445~myoblast differentiation	4	0.036743	-1.43482	fosl2, boc, robo4, cdon	1036	10	13373	5.16332	0.397724	0.379939
GOTERM_BP	GO:0060030~dorsal convergence	5	0.0376574	-1.42415	smad5, vangl2, chrd, gpc4, wnt5b	1036	17	13373	3.79656	0.403331	0.385295
GOTERM_BP	GO:0003318~cell migration to the midline involved in heart development	5	0.0376574	-1.42415	fn1a, cemip2, s1pr2, snai1b, hspb7	1036	17	13373	3.79656	0.403331	0.385295
GOTERM_BP	GO:0007167~enzyme linked receptor protein signaling pathway	44	0.0393413	-1.40515	lzts2a, tob1a, lcp2a, pdgfra, epha6, bmp3, foxc1b, inhbab, gdf6b, osr1, jak3, pdgfrb, skilb, bdnf, smad5, neo1a, fgf1a, spry4, erbb2, ddr2a, fgfr4, angpt1, errfi1a, tgfb2l, met, csf1rb, ephb4b, cdon, fgfr1b, foxc1a, smad3a, mstna, csf1ra, sfrp1a, tgif1, erbb3b, chrd, rgmd, dab2, hck, bmp7b, efna1b, baiap2b, fstl1a	1036	423	13373	1.34271	0.41916	0.400416
GOTERM_BP	GO:0002064~epithelial cell development	10	0.0400835	-1.39703	jag1b, fn1a, anln, ascl1a, bhmt, rilpl2, shroom3, crb2b, foxc1a, tnfrsf19	1036	60	13373	2.15138	0.424166	0.405198
GOTERM_BP	GO:0060027~convergent extension involved in gastrulation	12	0.040228	-1.39547	fzd2, fzd7b, mmp14a, smad5, fzd7a, mmp14b, vangl2, pfn1, chrd, gpc4, s1pr2, wnt5b	1036	79	13373	1.96075	0.424166	0.405198
GOTERM_BP	GO:0021675~nerve development	9	0.0408186	-1.38914	gli2a, adgrg6, erbb3b, foxd3, erbb2, nes, egr2b, rest, gli1	1036	51	13373	2.27794	0.428174	0.409028
GOTERM_BP	GO:0006260~DNA replication	16	0.0411209	-1.38594	cdc7, recql4, cdc6, mcm3, tonsl, gins2, mms22l, mcm10, mcm5, rrm1, mcm6, e2f8, pole, mcm2, mcm4, chaf1a	1036	119	13373	1.73557	0.429134	0.409944
GOTERM_BP	GO:0090092~regulation of transmembrane receptor protein serine/threonine kinase signaling pathway	16	0.04378	-1.35872	lzts2a, bmp3, inhbab, gdf6b, mstna, osr1, skilb, smad5, neo1a, sfrp1a, tgif1, chrd, dab2, bmp7b, tgfb2l, fstl1a	1036	120	13373	1.72111	0.454553	0.434226
GOTERM_BP	GO:0061564~axon development	38	0.0447473	-1.34923	gli2a, kif26bb, boc, cyfip1, sema6d, sema3fb, dpysl2b, ascl1a, neo1a, e2f8, lamb1a, erbb2, sema3gb, cnp, casp3a, rest, mmp25b, gli1, lama1, sema4e, grna, lingo4b, mmp14a, clcf1, rtn4r, cxcr4b, slit1a, notch1b, smo, kif26ab, mmp2, her4.2, erbb3b, robo4, fezf2, apoeb, notch1a, efna1b	1036	359	13373	1.36634	0.462238	0.441568
GOTERM_BP	GO:0045839~negative regulation of mitotic nuclear division	5	0.0455428	-1.34158	mad2l1, mcl1b, bub1, fbxo5, mcl1a	1036	18	13373	3.58564	0.468079	0.447148
GOTERM_BP	GO:0035239~tube morphogenesis	26	0.0464906	-1.33264	gli2a, nkd1, foxj1a, cenpf, dvl2, jag1b, smad5, cemip2, neo1a, fgf1a, pkd2, foxn4, dvl3a, s1pr2, fzd2, adgrg6, vangl2, shroom3, zic5, nek8, smo, fn1a, dld, ponzr1, chrd, pdlim7	1036	227	13373	1.47848	0.468768	0.447806
GOTERM_BP	GO:0051216~cartilage development	16	0.0465586	-1.332	inka1a, mmp14a, notch2, foxd3, pappa2, gpc4, smo, jag1b, tfap2a, mmp14b, dcn, ctsk, edn1, yap1, ednraa, wnt5b	1036	121	13373	1.70688	0.468768	0.447806
GOTERM_BP	GO:0043408~regulation of MAPK cascade	20	0.0474114	-1.32412	map3k5, zak, tnfrsf1b, gadd45ba, fas, bmp3, inhbab, gdf6b, cart2, tnfrsf19, mstna, gadd45bb, zgc:153759, cart3, spry4, pik3r5, bmp7b, tgfb2l, dusp6, ccl34b.1	1036	163	13373	1.58384	0.468768	0.447806
GOTERM_BP	GO:0048703~embryonic viscerocranium morphogenesis	13	0.0474732	-1.32355	prdm5, wls, lrp5, smo, fn1a, zic2b, ponzr1, egr1, edn1, s1pr2, pkn2, fsta, wnt5b	1036	91	13373	1.84404	0.468768	0.447806
GOTERM_BP	GO:0035329~hippo signaling	4	0.047683	-1.32164	tead3a, tead1a, ajuba, tead3b	1036	11	13373	4.69393	0.468768	0.447806
GOTERM_BP	GO:0060351~cartilage development involved in endochondral bone morphogenesis	4	0.047683	-1.32164	jag1b, notch2, foxd3, edn1	1036	11	13373	4.69393	0.468768	0.447806
GOTERM_BP	GO:0090175~regulation of establishment of planar polarity	4	0.047683	-1.32164	vangl2, dvl3a, ptk7a, dvl2	1036	11	13373	4.69393	0.468768	0.447806
GOTERM_BP	GO:0060350~endochondral bone morphogenesis	4	0.047683	-1.32164	jag1b, notch2, foxd3, edn1	1036	11	13373	4.69393	0.468768	0.447806
GOTERM_BP	GO:0045661~regulation of myoblast differentiation	4	0.047683	-1.32164	fosl2, boc, robo4, cdon	1036	11	13373	4.69393	0.468768	0.447806
GOTERM_BP	GO:0014004~microglia differentiation	3	0.0511234	-1.29138	irf8, csf1ra, slc7a7	1036	5	13373	7.74498	0.490736	0.468792
GOTERM_BP	GO:0051591~response to cAMP	3	0.0511234	-1.29138	junba, jund, junbb	1036	5	13373	7.74498	0.490736	0.468792
GOTERM_BP	GO:0003319~cardioblast migration to the midline involved in heart rudiment formation	3	0.0511234	-1.29138	fn1a, s1pr2, hspb7	1036	5	13373	7.74498	0.490736	0.468792
GOTERM_BP	GO:0048852~diencephalon morphogenesis	3	0.0511234	-1.29138	gli2a, gli2b, gli1	1036	5	13373	7.74498	0.490736	0.468792
GOTERM_BP	GO:0048850~hypophysis morphogenesis	3	0.0511234	-1.29138	gli2a, gli2b, gli1	1036	5	13373	7.74498	0.490736	0.468792
GOTERM_BP	GO:0034645~cellular macromolecule biosynthetic process	242	0.0524921	-1.27991	foxl2a, mybl1, pparg, ajuba, foxj1a, rorcb, si:ch211-13k12.2, nfatc4, mms22l, b3gnt7, nr1d2b, irf9, mcm6, fgf1a, foxn4, e2f8, pole, si:dkey-18a10.3, egr3, gli1, cry-dash, dre-mir-212, notch1b, nfil3, hist1h2a11, nr1d4a, mafk, hivep1, sfrp1a, nfil3-5, her8.2, id3, lzts2a, nfe2l1a, notch2, cdca7a, jdp2b, irak1, cry1bb, slc25a25a, rrm1, uhrf1, wt1b, slc25a23a, nfatc1, mcm2, stat6, phkg1a, recql4, he…	1036	2840	13373	1.09993	0.499228	0.476904
GOTERM_BP	GO:0001655~urogenital system development	20	0.0524987	-1.27985	gli2a, ap1m2, anln, dcdc2b, vangl2, shroom3, mafba, cenpf, foxc1a, wwtr1, nek8, cxadr, osr1, wt1b, ponzr1, fgf1a, pkd2, crb2b, pkd1b, yap1	1036	165	13373	1.56464	0.499228	0.476904
GOTERM_BP	GO:0030916~otic vesicle formation	6	0.0533344	-1.27299	sox3, smad5, tfap2a, chrd, tfap2c, fsta	1036	27	13373	2.86851	0.502479	0.480009
GOTERM_BP	GO:0001841~neural tube formation	6	0.0533344	-1.27299	neo1a, vangl2, shroom3, zic5, dvl3a, dvl2	1036	27	13373	2.86851	0.502479	0.480009
GOTERM_BP	GO:0010647~positive regulation of cell communication	33	0.0541456	-1.26644	map3k5, lzts2a, bbc3, gadd45ba, tespa1, bmp3, inhbab, cart2, gdf6b, CABZ01109021.1, tnfrsf19, f2r, cart3, neo1a, fgf1a, lpar6a, tgfb2l, ccl34b.1, gli1, zak, tnfrsf1b, vangl2, fas, gpr55a, mstna, smo, tradd, zgc:153759, gadd45bb, sfrp1a, robo4, pik3r5, bmp7b	1036	308	13373	1.38303	0.504335	0.481782
GOTERM_BP	GO:0033504~floor plate development	5	0.0542748	-1.2654	dla, gli2a, gli2b, smo, gli1	1036	19	13373	3.39692	0.504335	0.481782
GOTERM_BP	GO:0048702~embryonic neurocranium morphogenesis	5	0.0542748	-1.2654	pdgfrb, pdgfra, ndnf, prdm5, smo	1036	19	13373	3.39692	0.504335	0.481782
GOTERM_BP	GO:0007229~integrin-mediated signaling pathway	8	0.0559663	-1.25207	adam8a, itgb6, itgae.2, itgb2, itga9, itgb4, itgb7, itgb5	1036	45	13373	2.29481	0.517688	0.494538
GOTERM_BP	GO:0048732~gland development	24	0.0572504	-1.24222	grna, pkd1a, gli2a, notch2, cdca7a, cdipt, gli2b, foxc1a, dkk2, lrp5, smo, jag1b, fn1a, uhrf1, dld, ascl1a, e2f8, dmrta2, fads2, notch1a, jag1a, mcm2, met, gli1	1036	210	13373	1.47523	0.52717	0.503597
GOTERM_BP	GO:0030334~regulation of cell migration	19	0.0599679	-1.22208	sema4e, rtn4rl2a, gpc4, sema6d, rac2, cxcr4b, sema3fb, tnfrsf19, inpp5d, mt2, smad5, csf1ra, mmp14b, fgf1a, robo4, s1pr2, sema3gb, wasb, lama1	1036	157	13373	1.56215	0.54286	0.518584
GOTERM_BP	GO:0021594~rhombomere formation	4	0.0600214	-1.22169	spry4, mafba, egr2b, notch1b	1036	12	13373	4.30277	0.54286	0.518584
GOTERM_BP	GO:0060323~head morphogenesis	4	0.0600214	-1.22169	jag1b, tcf7l1a, notch2, edn1	1036	12	13373	4.30277	0.54286	0.518584
GOTERM_BP	GO:0060606~tube closure	4	0.0600214	-1.22169	adgrg6, shroom3, dvl3a, dvl2	1036	12	13373	4.30277	0.54286	0.518584
GOTERM_BP	GO:0014031~mesenchymal cell development	17	0.0606185	-1.21739	sema4e, foxd3, foxc1b, sema6d, tfap2c, foxc1a, sema3fb, lrp5, dla, zic2b, tfap2a, prrx1a, erbb3b, erbb2, sema3gb, col18a1a, rcc2	1036	136	13373	1.61354	0.545835	0.521426
GOTERM_BP	GO:0007369~gastrulation	27	0.0621163	-1.20679	fzd7b, lzts2a, mylipb, dusp2, dusp4, pcdh18a, osr1, smad5, snrkb, sox19b, mmp14b, s1pr2, dusp5, fzd2, mmp14a, apoc1, vangl2, pfn1, gpc4, snai1b, fzd7a, chrd, crb2b, notch1a, dusp6, gna13b, wnt5b	1036	245	13373	1.42255	0.556858	0.531957
GOTERM_BP	GO:0045995~regulation of embryonic development	11	0.0626459	-1.20311	smad5, cdk1, nkd1, chrd, dvl3a, notch1a, foxc1a, dusp6, dvl2, lama1, osr1	1036	75	13373	1.89322	0.559142	0.534139
GOTERM_BP	GO:0001822~kidney development	19	0.0661707	-1.17933	gli2a, ap1m2, anln, dcdc2b, shroom3, mafba, cenpf, foxc1a, wwtr1, nek8, cxadr, osr1, wt1b, ponzr1, fgf1a, pkd2, crb2b, pkd1b, yap1	1036	159	13373	1.5425	0.587645	0.561367
GOTERM_BP	GO:0021953~central nervous system neuron differentiation	13	0.0664169	-1.17772	gli2a, gli2b, notch1b, dlc, smo, dla, dld, foxn4, otpb, fezf2, notch1a, met, gli1	1036	96	13373	1.748	0.587645	0.561367
GOTERM_BP	GO:0060562~epithelial tube morphogenesis	22	0.0676551	-1.1697	fzd2, vangl2, shroom3, nkd1, zic5, foxj1a, cenpf, nek8, dvl2, smo, fn1a, smad5, cemip2, ponzr1, neo1a, fgf1a, pkd2, foxn4, chrd, dvl3a, s1pr2, pdlim7	1036	192	13373	1.47908	0.59601	0.569358
GOTERM_BP	GO:0001838~embryonic epithelial tube formation	6	0.0691734	-1.16006	neo1a, vangl2, shroom3, zic5, dvl3a, dvl2	1036	29	13373	2.67068	0.604154	0.577138
GOTERM_BP	GO:0048919~posterior lateral line neuromast development	6	0.0691734	-1.16006	smad5, rtn4rl2a, shroom3, erbb2, s1pr2, tnfrsf19	1036	29	13373	2.67068	0.604154	0.577138
GOTERM_BP	GO:0043065~positive regulation of apoptotic process	10	0.0721525	-1.14175	tradd, caspb, esco2, bbc3, bmf1, osgn1, casp8, fas, casp3a, dusp6	1036	67	13373	1.92661	0.617419	0.58981
GOTERM_BP	GO:0010942~positive regulation of cell death	10	0.0721525	-1.14175	tradd, caspb, esco2, bbc3, bmf1, osgn1, casp8, fas, casp3a, dusp6	1036	67	13373	1.92661	0.617419	0.58981
GOTERM_BP	GO:0043068~positive regulation of programmed cell death	10	0.0721525	-1.14175	tradd, caspb, esco2, bbc3, bmf1, osgn1, casp8, fas, casp3a, dusp6	1036	67	13373	1.92661	0.617419	0.58981
GOTERM_BP	GO:0072001~renal system development	19	0.0727965	-1.13789	gli2a, ap1m2, anln, dcdc2b, shroom3, mafba, cenpf, foxc1a, wwtr1, nek8, cxadr, osr1, wt1b, ponzr1, fgf1a, pkd2, crb2b, pkd1b, yap1	1036	161	13373	1.52334	0.617419	0.58981
GOTERM_BP	GO:0048853~forebrain morphogenesis	3	0.072816	-1.13777	gli2a, gli2b, gli1	1036	6	13373	6.45415	0.617419	0.58981
GOTERM_BP	GO:0003315~heart rudiment formation	3	0.072816	-1.13777	fn1a, s1pr2, hspb7	1036	6	13373	6.45415	0.617419	0.58981
GOTERM_BP	GO:0042542~response to hydrogen peroxide	3	0.072816	-1.13777	cat, per1a, per2	1036	6	13373	6.45415	0.617419	0.58981
GOTERM_BP	GO:0021511~spinal cord patterning	4	0.0736838	-1.13263	tcf7l1a, foxn4, rfx4, gli1	1036	13	13373	3.97178	0.621651	0.593853
GOTERM_BP	GO:0051784~negative regulation of nuclear division	5	0.0742316	-1.12941	mad2l1, mcl1b, bub1, fbxo5, mcl1a	1036	21	13373	3.07341	0.621651	0.593853
GOTERM_BP	GO:0003170~heart valve development	5	0.0742316	-1.12941	cemip2, foxn4, jupa, slc2a12, pdlim7	1036	21	13373	3.07341	0.621651	0.593853
GOTERM_BP	GO:0010948~negative regulation of cell cycle process	8	0.0745522	-1.12754	mad2l1, fanci, e2f8, mcl1b, bub1, ccnd1, fbxo5, mcl1a	1036	48	13373	2.15138	0.621778	0.593973
GOTERM_BP	GO:0048545~response to steroid hormone	13	0.0752064	-1.12374	paqr5b, pparg, abhd2a, nr4a3, esr1, paqr8, rorcb, nr1d1, nr4a1, nr1d2a, nr1d2b, rorca, nr1d4a	1036	98	13373	1.71233	0.624674	0.59674
GOTERM_BP	GO:0002521~leukocyte differentiation	12	0.0765972	-1.11579	jak3, cd79b, csf3r, irf8, tmem178, csf1ra, slc7a7, si:ch211-214p13.9, spi1a, casp8, spi1b, zgc:194469	1036	88	13373	1.76022	0.633639	0.605305
GOTERM_BP	GO:0008593~regulation of Notch signaling pathway	7	0.0772752	-1.11196	dla, pappa2, fezf2, chac1, CABZ01109021.1, foxc1a, egfl6	1036	39	13373	2.31687	0.63666	0.60819
GOTERM_BP	GO:0035850~epithelial cell differentiation involved in kidney development	6	0.0779637	-1.10811	anln, wt1b, shroom3, crb2b, foxc1a, osr1	1036	30	13373	2.58166	0.637174	0.608681
GOTERM_BP	GO:0060788~ectodermal placode formation	6	0.0779637	-1.10811	sox3, smad5, tfap2a, chrd, tfap2c, fsta	1036	30	13373	2.58166	0.637174	0.608681
GOTERM_BP	GO:0048812~neuron projection morphogenesis	37	0.0783573	-1.10592	gli2a, kif26bb, boc, cyfip1, nyap2b, sema6d, sema3fb, dpysl2b, bdnf, neo1a, e2f8, lamb1a, sema3gb, casp3a, rest, mmp25b, gli1, lama1, sema4e, grna, lingo4b, mmp14a, rbpms2b, rtn4r, cxcr4b, slit1a, notch1b, smo, si:ch211-195b13.1, kif26ab, mmp2, her4.2, robo4, fezf2, apoeb, notch1a, efna1b	1036	365	13373	1.30851	0.637829	0.609307
GOTERM_BP	GO:0001755~neural crest cell migration	12	0.0816087	-1.08826	sema4e, erbb3b, foxd3, erbb2, sema3gb, foxc1b, col18a1a, sema6d, foxc1a, sema3fb, rcc2, lrp5	1036	89	13373	1.74045	0.661648	0.632061
GOTERM_BP	GO:0051271~negative regulation of cellular component movement	10	0.0835885	-1.07785	sema4e, smad5, rtn4rl2a, s1pr2, sema3gb, sema6d, cxcr4b, sema3fb, tnfrsf19, inpp5d	1036	69	13373	1.87077	0.67501	0.644826
GOTERM_BP	GO:0008203~cholesterol metabolic process	7	0.0852613	-1.06925	sqlea, fgf1a, cyp51, sc5d, apoeb, insig1, ch25h	1036	40	13373	2.25895	0.681646	0.651165
GOTERM_BP	GO:0045861~negative regulation of proteolysis	7	0.0852613	-1.06925	tfpia, mcl1b, edn1, serpine1, chac1, pak2a, mcl1a	1036	40	13373	2.25895	0.681646	0.651165
GOTERM_BP	GO:0061326~renal tubule development	5	0.0854152	-1.06847	ponzr1, fgf1a, pkd2, nek8, osr1	1036	22	13373	2.9337	0.681646	0.651165
GOTERM_BP	GO:0061005~cell differentiation involved in kidney development	6	0.0873235	-1.05887	anln, wt1b, shroom3, crb2b, foxc1a, osr1	1036	31	13373	2.49838	0.693332	0.662328
GOTERM_BP	GO:0032098~regulation of appetite	4	0.088583	-1.05265	npy, cart3, pyyb, cart2	1036	14	13373	3.68809	0.693332	0.662328
GOTERM_BP	GO:0021508~floor plate formation	4	0.088583	-1.05265	gli2a, gli2b, smo, gli1	1036	14	13373	3.68809	0.693332	0.662328
GOTERM_BP	GO:0033505~floor plate morphogenesis	4	0.088583	-1.05265	gli2a, gli2b, smo, gli1	1036	14	13373	3.68809	0.693332	0.662328
GOTERM_BP	GO:0046688~response to copper ion	4	0.088583	-1.05265	mt2, entpd1, cat, entpd2a.1	1036	14	13373	3.68809	0.693332	0.662328
GOTERM_BP	GO:0090100~positive regulation of transmembrane receptor protein serine/threonine kinase signaling pathway	9	0.0899232	-1.04613	lzts2a, neo1a, sfrp1a, bmp3, inhbab, bmp7b, gdf6b, tgfb2l, mstna	1036	60	13373	1.93625	0.701125	0.669773
GOTERM_BP	GO:1902652~secondary alcohol metabolic process	7	0.0936839	-1.02834	sqlea, fgf1a, cyp51, sc5d, apoeb, insig1, ch25h	1036	41	13373	2.20386	0.727659	0.69512
GOTERM_BP	GO:0071622~regulation of granulocyte chemotaxis	3	0.0968355	-1.01397	csf1ra, cxcr4b, inpp5d	1036	7	13373	5.53213	0.738129	0.705121
GOTERM_BP	GO:0003314~heart rudiment morphogenesis	3	0.0968355	-1.01397	fn1a, s1pr2, hspb7	1036	7	13373	5.53213	0.738129	0.705121
GOTERM_BP	GO:0048566~embryonic digestive tract development	3	0.0968355	-1.01397	gli2a, ascl1a, smo	1036	7	13373	5.53213	0.738129	0.705121
GOTERM_BP	GO:0009826~unidimensional cell growth	3	0.0968355	-1.01397	gpc4, gna13b, wnt5b	1036	7	13373	5.53213	0.738129	0.705121
GOTERM_BP	GO:0030902~hindbrain development	14	0.0968454	-1.01392	vangl2, gli2b, mafba, egr2b, notch1b, dvl2, smo, zic2b, ascl1a, tfap2a, ascl1b, spry4, met, gli1	1036	113	13373	1.59926	0.738129	0.705121
