# Supplementary material for: Brain Regeneration Resembles Brain Cancer at Its Early Wound Healing Stage and Diverges From Cancer Later at Its Proliferation and Differentiation Stages
Source: Front Cell Dev Biol. 2022 Feb 10;10:813314. doi: 10.3389/fcell.2022.813314 (PMC8868567; doi:10.3389/fcell.2022.813314)
Supplement: Supplementary file 3 [file Table9.XLSX]

## Sheet: 1dpl-LGG_shared_genes
Supplementary Table 9: KEGG pathways are enriched based on transcriptional changes in comparison of three different stages of zebrafish brain regeneration with LGG (E) and GBM (F) by using human identifiers of shared DEGs.
Category	Term	Count	PValue	log10(Pvalue)	Genes	List.Total	Pop.Hits	Pop.Total	Fold.Enrichment	Benjamini	FDR
KEGG_PATHWAY	hsa03010:Ribosome	61	1.39449e-27	-26.8556	RPS8, RPS13, RPLP2, RPS7, RPL13A, MRPL24, RPS9, RPS16, RPL34, RPL13, RPL23, RPS24, RPL35, MRPL11, FAU, RPSA, RPS28, RPL12, RPS6, RPS18, RPL19, RPL29, RPS14, RPL21, RPS11, RPL35A, RPS3, RPL23A, RPL27, RPL37, RPS12, RPL17, RPL37A, RPL39, RPL22L1, RPS10, RPL6, RPL30, RPS2, RPS23, RPL18, RPS19, RPL14, RPLP1, RPS4X, RPS25, RPS5, RPL4, RPL10A, RPS3A, RPL7, RPL22, RPL24, RPL3, RPS27L, RPL5, RPLP0, RPS17…	634	136	6879	4.86661	3.61172e-25	3.09576e-25
KEGG_PATHWAY	hsa04010:MAPK signaling pathway	46	9.58754e-06	-5.01829	IKBKB, MAPK10, RAPGEF2, FGF13, RASGRF2, KRAS, CACNA2D1, PAK2, MAPK8IP2, ARRB1, MYC, MAP2K4, CACNA1I, CACNB1, DUSP8, CACNA1F, HSPA8, TP53, NFATC3, MAPK1, MAP3K1, TGFBR1, CACNA1C, RPS6KA2, MAPKAPK3, CACNA1D, CACNA1E, BRAF, CACNA2D3, GADD45G, MAPK13, FLNA, AKT3, PPM1A, RASGRF1, ELK1, PPP3R1, MAPKAPK2, MAPK8IP1, TAOK3, PRKCB, CACNB2, NLK, GNA12, CACNB3, RPS6KA4	634	253	6879	1.97276	0.000768355	0.00065859
KEGG_PATHWAY	hsa04723:Retrograde endocannabinoid signaling	25	1.00567e-05	-4.99755	MAPK10, SLC17A7, SLC17A6, GNAI3, KCNJ9, CNR1, GABRD, RIMS1, GRM5, CACNA1F, GABRA4, GABRA1, MAPK1, CACNA1C, GABRG2, GNG5, CACNA1D, KCNJ6, MAPK13, GNB4, GNAO1, GABRA5, PRKCB, ADCY1, GABRB2	634	101	6879	2.68568	0.000768355	0.00065859
KEGG_PATHWAY	hsa04921:Oxytocin signaling pathway	32	1.18665e-05	-4.92568	ROCK2, KRAS, GNAI3, KCNJ9, PRKAA2, CACNA2D1, KCNJ12, CAMK1, CACNB1, PPP1R12C, CAMK2B, CACNA1F, NFATC3, CAMK4, MAPK1, PRKAB1, CACNA1C, GUCY1B1, CACNA1D, KCNJ6, CACNA2D3, CAMK2D, GNAO1, CAMKK1, CAMK2A, ELK1, PPP3R1, CAMK1D, PRKCB, CACNB2, ADCY1, CACNB3	634	150	6879	2.3147	0.000768355	0.00065859
KEGG_PATHWAY	hsa04150:mTOR signaling pathway	17	4.4145e-05	-4.35512	IKBKB, MAPK1, ULK1, CAB39, RPS6KA2, PRKAA2, PTEN, BRAF, EIF4E, PIK3CB, AKT3, RPS6, EIF4EBP1, EIF4B, PRKCB, DDIT4, RPTOR	634	58	6879	3.18022	0.00228671	0.00196004
KEGG_PATHWAY	hsa04725:Cholinergic synapse	24	0.000151081	-3.82079	CHRM3, CAMK4, MAPK1, CACNA1C, GNG5, KRAS, GNAI3, KCNQ2, CACNA1D, CHRM2, KCNJ6, CAMK2D, GNB4, PIK3CB, GNAO1, AKT3, KCNJ12, CAMK2A, KCNQ5, KCNQ3, CAMK2B, ADCY1, PRKCB, CACNA1F	634	111	6879	2.34598	0.00646442	0.00554094
KEGG_PATHWAY	hsa05032:Morphine addiction	21	0.000174714	-3.75767	GABRA1, GRK6, GABBR2, GNG5, GABRG2, GNAI3, KCNJ9, KCNJ6, OPRM1, ARRB1, PDE4A, GNB4, GNAO1, GABRD, GABRA5, GRK3, ADCY1, PRKCB, GABRB2, DRD1, GABRA4	634	91	6879	2.50388	0.00646442	0.00554094
KEGG_PATHWAY	hsa04727:GABAergic synapse	20	0.000199724	-3.69957	GABRA1, CACNA1C, GAD1, GLS, GABBR2, GNG5, GABRG2, GNAI3, CACNA1D, KCNJ6, GNB4, GNAO1, GABRD, GABRA5, ADCY1, PRKCB, GABRB2, NSF, CACNA1F, GABRA4	634	85	6879	2.55298	0.00646605	0.00554233
KEGG_PATHWAY	hsa04020:Calcium signaling pathway	32	0.000382985	-3.41682	TNNC2, F2R, PLCD3, HTR7, HTR4, ADRA1B, PTK2B, CACNA1I, GRIN2A, GRM5, CAMK2B, CACNA1F, DRD1, CHRM3, CAMK4, CACNA1C, ADRB1, SLC8A2, CACNA1D, CACNA1E, CHRM2, CAMK2D, CAMK2A, ATP2B2, EDNRA, SLC8A1, GNAL, PPP3R1, NTSR1, PRKCB, ADCY1, PPIF	634	179	6879	1.93969	0.0110215	0.00944696
KEGG_PATHWAY	hsa04721:Synaptic vesicle cycle	16	0.000450701	-3.34611	UNC13A, NAPA, DNM1, SLC17A7, SLC17A6, ATP6V0E1, RAB3A, STX1B, CLTCL1, ATP6V1E1, STXBP1, CPLX2, RIMS1, ATP6V0C, ATP6V0A2, NSF	634	63	6879	2.7556	0.0116731	0.0100056
KEGG_PATHWAY	hsa04024:cAMP signaling pathway	34	0.000514946	-3.28824	MAPK10, ROCK2, F2R, GNAI3, HTR4, GRIN2B, GRIN2A, ATP1B1, CAMK2B, ATP1B4, CACNA1F, DRD1, CAMK4, MAPK1, CACNA1C, ADRB1, TIAM1, GABBR2, CACNA1D, CHRM2, BRAF, PDE4A, CAMK2D, PIK3CB, AKT3, CAMK2A, ATP2B2, EDNRA, ATP1A1, ADCYAP1R1, PTCH1, ADCY1, ABCC4, NPY1R	634	198	6879	1.86316	0.0121246	0.0103925
KEGG_PATHWAY	hsa04724:Glutamatergic synapse	23	0.000596198	-3.22461	MAPK1, CACNA1C, DLG4, GLS, GNG5, SLC17A7, SLC17A6, GNAI3, GRM2, GRM3, CACNA1D, GNB4, GRIN2B, SHANK3, GNAO1, GRIN2A, GRM5, PPP3R1, GRK3, ADCY1, PRKCB, HOMER3, SHANK2	634	114	6879	2.18907	0.0128679	0.0110297
KEGG_PATHWAY	hsa04261:Adrenergic signaling in cardiomyocytes	26	0.000699364	-3.1553	GNAI3, CACNA2D1, PPP2R5A, PPP2CA, ADRA1B, CACNB1, ATP1B1, CAMK2B, ATP1B4, CACNA1F, MAPK1, CACNA1C, ADRB1, PPP2R2C, CACNA1D, CACNA2D3, MAPK13, CAMK2D, TPM3, AKT3, CAMK2A, ATP2B2, ATP1A1, CACNB2, ADCY1, CACNB3	634	138	6879	2.04423	0.0139335	0.011943
KEGG_PATHWAY	hsa04713:Circadian entrainment	20	0.000880218	-3.05541	MAPK1, CACNA1C, GNG5, GUCY1B1, GNAI3, KCNJ9, CACNA1D, KCNJ6, CAMK2D, GNB4, GRIN2B, NOS1AP, GNAO1, CAMK2A, CACNA1I, GRIN2A, CAMK2B, ADCYAP1R1, ADCY1, PRKCB	634	95	6879	2.28424	0.016284	0.0139577
KEGG_PATHWAY	hsa04360:Axon guidance	24	0.00113397	-2.9454	ROCK2, SEMA5A, UNC5D, MAPK1, SRGAP3, KRAS, PLXNA2, GNAI3, SEMA6B, PAK2, PAK6, NGEF, UNC5A, SEMA4F, PLXNA1, NCK1, SEMA4B, EPHA6, CXCR4, DPYSL2, PLXNA3, PPP3R1, NFATC3, EFNA5	634	127	6879	2.05042	0.0195799	0.0167828
KEGG_PATHWAY	hsa04728:Dopaminergic synapse	24	0.0012659	-2.8976	MAPK10, CACNA1C, GSK3A, GNG5, PPP2R2C, GNAI3, KCNJ9, PPP2R5A, CACNA1D, KCNJ6, CLOCK, PPP2CA, MAPK13, CAMK2D, GNB4, GRIN2B, GNAO1, AKT3, CAMK2A, GNAL, GRIN2A, CAMK2B, PRKCB, DRD1	634	128	6879	2.0344	0.0204918	0.0175644
KEGG_PATHWAY	hsa04720:Long-term potentiation	15	0.00228983	-2.6402	CAMK4, MAPK1, CACNA1C, RPS6KA2, KRAS, BRAF, CAMK2D, GRIN2B, CAMK2A, GRIN2A, GRM5, CAMK2B, PPP3R1, ADCY1, PRKCB	634	66	6879	2.46594	0.0348862	0.0299024
KEGG_PATHWAY	hsa04012:ErbB signaling pathway	17	0.00526589	-2.27853	MAPK10, MAPK1, KRAS, PAK2, PAK6, MYC, BRAF, MAP2K4, CAMK2D, NCK1, PIK3CB, AKT3, EIF4EBP1, CAMK2A, CAMK2B, ELK1, PRKCB	634	87	6879	2.12015	0.0753028	0.0645452
KEGG_PATHWAY	hsa05212:Pancreatic cancer	14	0.00552414	-2.25774	MAPK10, IKBKB, MAPK1, TGFBR1, CDK6, KRAS, BRAF, CDK4, RAD51, RALB, STAT3, PIK3CB, AKT3, TP53	634	65	6879	2.33696	0.0753028	0.0645452
KEGG_PATHWAY	hsa04071:Sphingolipid signaling pathway	21	0.00621999	-2.20621	MAPK10, ROCK2, MAPK1, ASAH1, KRAS, PPP2R2C, GNAI3, PPP2R5A, PRKCE, PTEN, PPP2CA, MAPK13, PRKCZ, SGPL1, PIK3CB, AKT3, BAX, GNA13, PRKCB, GNA12, TP53	634	120	6879	1.89878	0.0805488	0.0690418
KEGG_PATHWAY	hsa04910:Insulin signaling pathway	23	0.00724215	-2.14013	MAPK10, IKBKB, MAPK1, PRKAB1, HKDC1, SH2B2, KRAS, PRKAR1A, PRKAA2, PRKAR1B, BRAF, PRKAR2B, EIF4E, PRKCZ, PIK3CB, AKT3, RPS6, EIF4EBP1, PKLR, TRIP10, ELK1, RPTOR, INPPL1	634	138	6879	1.80836	0.0893199	0.0765599
KEGG_PATHWAY	hsa04912:GnRH signaling pathway	17	0.0082042	-2.08596	MAPK10, MAP3K1, MAPK1, CACNA1C, KRAS, CACNA1D, MAP2K4, MMP14, MAPK13, CAMK2D, PTK2B, CAMK2A, CAMK2B, ELK1, ADCY1, PRKCB, CACNA1F	634	91	6879	2.02695	0.0965858	0.0827878
KEGG_PATHWAY	hsa05033:Nicotine addiction	10	0.00906279	-2.04274	GRIN2B, GABRA1, GABRD, GABRG2, SLC17A7, SLC17A6, GABRA5, GRIN2A, GABRB2, GABRA4	634	40	6879	2.71254	0.101882	0.0873272
KEGG_PATHWAY	hsa04022:cGMP-PKG signaling pathway	25	0.00944077	-2.02499	ROCK2, GNAI3, MEF2A, ADRA1B, ATP1B1, ATP1B4, CACNA1F, NFATC3, MAPK1, CACNA1C, ADRB1, SLC8A2, GUCY1B1, PRKCE, CACNA1D, AKT3, ATP2B2, EDNRA, SLC8A1, PPP3R1, GNA13, ATP1A1, ADCY1, GNA12, PPIF	634	158	6879	1.7168	0.101882	0.0873272
KEGG_PATHWAY	hsa04911:Insulin secretion	16	0.00995932	-2.00177	CHRM3, KCNN1, CACNA1C, RAB3A, CACNA1D, CAMK2D, PCLO, CAMK2A, ATP1B1, CAMK2B, ADCYAP1R1, ATP1A1, ADCY1, PRKCB, ATP1B4, CACNA1F	634	85	6879	2.04238	0.103179	0.0884388
KEGG_PATHWAY	hsa04930:Type II diabetes mellitus	11	0.0106339	-1.97331	MAPK10, IKBKB, MAPK1, CACNA1C, HKDC1, PIK3CB, PKLR, PRKCE, CACNA1D, CACNA1E, PRKCZ	634	48	6879	2.48649	0.10593	0.0907973
KEGG_PATHWAY	hsa04144:Endocytosis	34	0.0126633	-1.89745	SH3GLB2, BIN1, ZFYVE9, ARRB1, SNX5, CXCR4, PSD, SH3GL2, IQSEC2, SH3GL3, ARFGEF2, HSPA8, MVB12A, EHD3, TGFBR1, GRK6, AGAP3, DNM1, SPG21, ARF3, CLTCL1, SH3GLB1, AGAP1, RAB11FIP5, PRKCZ, VPS25, NEDD4L, IQSEC1, IQSEC3, PIP5K1C, PARD3, RAB11FIP2, GRK3, CHMP1B	634	241	6879	1.53073	0.11821	0.101323
KEGG_PATHWAY	hsa05161:Hepatitis B	23	0.0127795	-1.89349	MAPK10, ATP6AP1, IKBKB, MAP3K1, MAPK1, TGFBR1, PCNA, CDK6, KRAS, EGR3, PTEN, MYC, MAP2K4, CDK4, STAT3, PIK3CB, AKT3, PTK2B, BAX, ELK1, PRKCB, TP53, NFATC3	634	145	6879	1.72106	0.11821	0.101323
KEGG_PATHWAY	hsa05214:Glioma	13	0.014229	-1.84683	MAPK1, CDK6, KRAS, PTEN, BRAF, CDK4, CAMK2D, PIK3CB, AKT3, CAMK2A, CAMK2B, PRKCB, TP53	634	65	6879	2.17003	0.127079	0.108925
KEGG_PATHWAY	hsa04070:Phosphatidylinositol signaling system	17	0.016369	-1.78598	DGKH, PLCD3, PI4KA, DGKB, DGKE, PTEN, DGKZ, SYNJ1, PIP4P1, INPP4A, PIK3CB, PPIP5K1, PIP5K1C, INPP5J, IP6K1, PRKCB, INPPL1	634	98	6879	1.88217	0.141319	0.121131
KEGG_PATHWAY	hsa04260:Cardiac muscle contraction	14	0.0182286	-1.73925	COX5A, CACNA1C, CACNA2D1, COX7A2L, CACNA1D, CACNA2D3, TPM3, ATP1B1, CACNB1, ATP1A1, CACNB2, ATP1B4, CACNA1F, CACNB3	634	75	6879	2.02536	0.144803	0.124117
KEGG_PATHWAY	hsa05213:Endometrial cancer	11	0.0184498	-1.73401	MAPK1, PIK3CB, AKT3, KRAS, ELK1, CTNNA1, AXIN1, PTEN, MYC, BRAF, TP53	634	52	6879	2.29523	0.144803	0.124117
KEGG_PATHWAY	hsa05110:Vibrio cholerae infection	11	0.0184498	-1.73401	ATP6AP1, PDIA4, KDELR2, SEC61B, ATP6V0E1, ATP6V0A2, ATP6V0C, ERO1A, ATP6V1E1, SEC61A1, PRKCB	634	52	6879	2.29523	0.144803	0.124117
KEGG_PATHWAY	hsa04730:Long-term depression	12	0.0194372	-1.71137	GNAZ, MAPK1, GNAO1, KRAS, GUCY1B1, GNAI3, GNA13, BRAF, PPP2CA, PRKCB, GNA12, CRHR1	634	60	6879	2.17003	0.148066	0.126914
KEGG_PATHWAY	hsa05231:Choline metabolism in cancer	17	0.0213658	-1.67028	MAPK10, DGKH, MAPK1, SLC44A2, KRAS, DGKB, DGKE, DGKZ, PIK3CB, WASF2, AKT3, EIF4EBP1, HIF1A, PIP5K1C, WASF1, PDGFC, PRKCB	634	101	6879	1.82626	0.158107	0.13552
KEGG_PATHWAY	hsa04726:Serotonergic synapse	18	0.0244563	-1.61161	MAPK1, CACNA1C, GNG5, HTR7, KRAS, GNAI3, KCNJ9, APP, HTR4, CACNA1D, KCNJ6, BRAF, GNB4, TPH2, GNAO1, PRKCB, GABRB2, CACNA1F	634	111	6879	1.75949	0.172533	0.147886
KEGG_PATHWAY	hsa05410:Hypertrophic cardiomyopathy (HCM)	14	0.0246476	-1.60822	PRKAB1, CACNA1C, ITGB8, PRKAA2, CACNA2D1, CACNA1D, CACNA2D3, DAG1, ITGA9, TPM3, CACNB1, CACNB2, CACNA1F, CACNB3	634	78	6879	1.94746	0.172533	0.147886
KEGG_PATHWAY	hsa04810:Regulation of actin cytoskeleton	29	0.0282247	-1.54937	ROCK2, F2R, FGF13, ITGB8, KRAS, PAK2, PAK6, BAIAP2, ITGA9, NCKAP1, SSH1, ENAH, PDGFC, PPP1R12C, CHRM3, MAPK1, PFN1, TIAM1, CHRM2, BRAF, IQGAP2, CYFIP2, PIK3CB, WASF2, PIP5K1C, WASF1, PXN, GNA13, GNA12	634	210	6879	1.49836	0.192374	0.164892
KEGG_PATHWAY	hsa05230:Central carbon metabolism in cancer	12	0.0302297	-1.51957	MAPK1, HKDC1, GLS, PIK3CB, AKT3, HIF1A, KRAS, SIRT6, PTEN, MYC, TP53, PGAM1	634	64	6879	2.0344	0.200756	0.172077
KEGG_PATHWAY	hsa04925:Aldosterone synthesis and secretion	14	0.0325999	-1.48678	CAMK4, CACNA1C, PRKCE, CACNA1D, CAMK2D, CAMK2A, CAMK1, CACNA1I, CAMK2B, CAMK1D, ADCY1, PRKCB, CACNA1F, KCNK9	634	81	6879	1.87534	0.211085	0.18093
KEGG_PATHWAY	hsa04141:Protein processing in endoplasmic reticulum	24	0.0358163	-1.44592	MAPK10, DNAJC5, DAD1, PDIA4, TRAM1, SEC61B, LMAN1, HSPA4L, ERO1A, PRKCSH, SEC61A1, DNAJC5G, NFE2L2, DNAJC1, SEC13, PRKN, BAX, SSR4, P4HB, HYOU1, PPP1R15A, DNAJA1, HSPA8, SSR2	634	169	6879	1.54085	0.223753	0.191788
KEGG_PATHWAY	hsa05031:Amphetamine addiction	12	0.0369895	-1.43192	CAMK2D, GRIN2B, CAMK4, CACNA1C, PDYN, CAMK2A, GRIN2A, CAMK2B, CACNA1D, PPP3R1, PRKCB, DRD1	634	66	6879	1.97276	0.223753	0.191788
KEGG_PATHWAY	hsa04068:FoxO signaling pathway	20	0.0371481	-1.43006	MAPK10, BCL6, IKBKB, MAPK1, PRKAB1, TGFBR1, KRAS, PRKAA2, PTEN, BRAF, GADD45G, MAPK13, STAT3, PIK3CB, AKT3, RBL2, NLK, BNIP3, HOMER3, PLK2	634	134	6879	1.61943	0.223753	0.191788
KEGG_PATHWAY	hsa04270:Vascular smooth muscle contraction	18	0.0384162	-1.41549	ROCK2, RAMP2, MAPK1, CACNA1C, GUCY1B1, PRKCE, CACNA1D, BRAF, ARHGEF11, ADRA1B, CALCRL, EDNRA, PPP1R12C, GNA13, ADCY1, PRKCB, CACNA1F, GNA12	634	117	6879	1.66926	0.226132	0.193827
KEGG_PATHWAY	hsa05412:Arrhythmogenic right ventricular cardiomyopathy (ARVC)	12	0.0407383	-1.39	ITGA9, CACNA1C, ITGB8, CACNA2D1, CACNB1, CTNNA1, CACNA1D, CACNA2D3, CACNB2, CACNB3, DAG1, CACNA1F	634	67	6879	1.94331	0.229862	0.197025
KEGG_PATHWAY	hsa04350:TGF-beta signaling pathway	14	0.0422545	-1.37413	MAPK1, TGFBR1, TFDP1, ACVR1B, SMAD5, ZFYVE9, ID3, MYC, PPP2CA, E2F5, BMPR2, BMP2, ACVR2A, ID1	634	84	6879	1.80836	0.229862	0.197025
KEGG_PATHWAY	hsa05414:Dilated cardiomyopathy	14	0.0422545	-1.37413	CACNA1C, ADRB1, ITGB8, CACNA2D1, CACNA1D, CACNA2D3, DAG1, ITGA9, TPM3, CACNB1, ADCY1, CACNB2, CACNA1F, CACNB3	634	84	6879	1.80836	0.229862	0.197025
KEGG_PATHWAY	hsa03013:RNA transport	24	0.0425999	-1.37059	EIF3G, CLNS1A, NUP37, NCBP2, EEF1A1, NMD3, EIF3E, RBM8A, EIF4E, EIF4EBP3, CYFIP2, NUP35, EIF4EBP1, NXT2, SEC13, EIF4B, THOC7, EIF5, PRMT5, EIF3D, EIF3F, NUP43, AAAS, EIF3H	634	172	6879	1.51398	0.229862	0.197025
KEGG_PATHWAY	hsa04722:Neurotrophin signaling pathway	18	0.0472417	-1.32567	MAPK10, CAMK4, IKBKB, MAP3K1, MAPK1, SH2B2, RPS6KA2, KRAS, BRAF, MAPK13, CAMK2D, PIK3CB, AKT3, CAMK2A, BAX, MAPKAPK2, CAMK2B, TP53	634	120	6879	1.62752	0.249706	0.214034
KEGG_PATHWAY	hsa05210:Colorectal cancer	11	0.0550577	-1.25918	MAPK10, MAPK1, TGFBR1, PIK3CB, AKT3, KRAS, BAX, AXIN1, MYC, BRAF, TP53	634	62	6879	1.92503	0.285199	0.244456
KEGG_PATHWAY	hsa04710:Circadian rhythm	7	0.0599309	-1.22235	PRKAB1, BHLHE40, PRKAA2, RORB, CRY1, CLOCK, NR1D1	634	31	6879	2.45004	0.304355	0.260876
KEGG_PATHWAY	hsa04960:Aldosterone-regulated sodium reabsorption	8	0.0622648	-1.20576	MAPK1, PIK3CB, KRAS, ATP1B1, ATP1A1, PRKCB, ATP1B4, NEDD4L	634	39	6879	2.22567	0.310127	0.265823
KEGG_PATHWAY	hsa05205:Proteoglycans in cancer	26	0.0695118	-1.15794	ROCK2, KRAS, ANK3, MYC, STAT3, HIF1A, PPP1R12C, CAMK2B, TP53, MAPK1, TIAM1, HPSE2, BRAF, MAPK13, FLNA, CAMK2D, PIK3CB, AKT3, RPS6, CAMK2A, FZD3, EIF4B, PXN, ELK1, PRKCB, PTCH1	634	200	6879	1.41052	0.33969	0.291163
KEGG_PATHWAY	hsa04015:Rap1 signaling pathway	27	0.0714019	-1.14629	F2R, RAPGEF2, FGF13, RAP1GAP, KRAS, GNAI3, SIPA1L1, CNR1, GRIN2B, TLN2, ID1, GRIN2A, PDGFC, EFNA5, MAPK1, PFN1, TIAM1, BRAF, PRKCZ, MAPK13, RALB, GNAO1, PIK3CB, AKT3, PARD3, PRKCB, ADCY1	634	210	6879	1.39502	0.342465	0.293541
KEGG_PATHWAY	hsa05030:Cocaine addiction	9	0.0766087	-1.11572	GRIN2B, DLG4, PDYN, GNAI3, GRM2, GRM3, GRIN2A, CDK5R1, DRD1	634	49	6879	1.99289	0.360757	0.309221
KEGG_PATHWAY	hsa05142:Chagas disease (American trypanosomiasis)	15	0.0940928	-1.02644	MAPK10, IKBKB, MAPK1, TGFBR1, PPP2R2C, GNAI3, PPP2CA, MAP2K4, MAPK13, PIK3CB, GNAO1, AKT3, GNAL, ADCY1, IL12A	634	104	6879	1.56493	0.435179	0.373011
KEGG_PATHWAY	hsa04320:Dorso-ventral axis formation	6	0.0964539	-1.01568	CPEB3, MAPK1, CPEB1, KRAS, NOTCH1, CPEB2	634	27	6879	2.41115	0.438273	0.375663

## Sheet: 3dpl-LGG_shared_genes
Category	Term	Count	PValue	log10(Pvalue)	Genes	List.Total	Pop.Hits	Pop.Total	Fold.Enrichment	Benjamini	FDR
KEGG_PATHWAY	hsa03010:Ribosome	59	1.67027e-35	-34.7772	RPS8, RPS13, RPLP2, RPS7, RPL13A, RPS9, RPS16, RPL34, RPL13, RPL23, RPS24, RPL35, FAU, RPSA, RPS28, RPL12, RPS6, RPS18, RPL19, RPL29, RPS14, RPL21, RPS11, RPL35A, RPS3, RPL23A, RPL27, RPL37, RPS12, RPL17, RPL37A, RPL39, RPL22L1, RPS10, RPL6, RPL30, RPS2, RPS23, RPL18, RPS19, RPL14, RPLP1, RPS4X, RPS25, RPS5, RPL4, RPL10A, RPS3A, RPL7, RPL22, RPL24, RPL3, RPS27L, RPL5, RPLP0, RPS17, RPL10, RPL11, …	422	136	6879	7.07173	4.2425e-33	4.14228e-33
KEGG_PATHWAY	hsa04110:Cell cycle	27	1.97599e-08	-7.70422	CDKN2C, DBF4, TTK, CDK1, MYC, RB1, CCNB2, CDK4, E2F5, CCNE2, CDC20, ORC1, CHEK1, TP53, PCNA, RBL1, MCM3, ESPL1, GADD45G, CCND1, BUB1, WEE1, MCM7, CCNA2, CDC45, MCM5, CHEK2	422	124	6879	3.5494	2.50951e-06	2.45023e-06
KEGG_PATHWAY	hsa03030:DNA replication	13	7.69573e-07	-6.11375	RFC4, PCNA, MCM3, PRIM1, RNASEH2A, POLD2, POLD1, POLA1, POLE2, PRIM2, MCM7, POLE, MCM5	422	36	6879	5.88645	6.51572e-05	6.3618e-05
KEGG_PATHWAY	hsa04115:p53 signaling pathway	14	0.000170707	-3.76775	GTSE1, CCNG1, STEAP3, CDK1, CCNB2, CDK4, GADD45G, CCNE2, CCND1, CD82, RRM2, CHEK1, CHEK2, TP53	422	67	6879	3.40617	0.0108399	0.0105838
KEGG_PATHWAY	hsa05200:Pathways in cancer	41	0.000894987	-3.04818	ROCK2, F2R, ETS1, FGF13, TCF7L1, GLI2, LAMB2, CTNNA1, DVL2, MYC, CKS1B, PDGFRA, RB1, CDK4, CCNE2, STAT3, COL4A1, HIF1A, CXCR4, DVL3, MMP2, BIRC5, BIRC7, TP53, GNG13, PLCB3, BRCA2, GNG5, ITGAV, PGF, RAD51, CCND1, RALB, CKS2, PIK3CB, TPM3, EDNRA, LAMB4, SMO, GNA13, GNA12	422	393	6879	1.70061	0.0454653	0.0443914
KEGG_PATHWAY	hsa04020:Calcium signaling pathway	23	0.00127992	-2.89282	CHRM3, CAMK4, P2RX7, F2R, HTR5A, HRH2, ADRB1, PLCB3, HTR7, PLCD1, ITPR1, GRM1, PDGFRA, TACR2, CAMK2D, PTK2B, EDNRA, SLC8A1, GRIN2A, ITPR2, ORAI1, TACR3, PHKG1	422	179	6879	2.09454	0.0541832	0.0529032
KEGG_PATHWAY	hsa05222:Small cell lung cancer	14	0.00181876	-2.74022	ITGAV, LAMB2, MYC, RB1, CKS1B, CDK4, CCNE2, CCND1, COL4A1, PIK3CB, CKS2, LAMB4, TP53, BIRC7	422	85	6879	2.68486	0.0659952	0.0644362
KEGG_PATHWAY	hsa05161:Hepatitis B	19	0.003088	-2.51032	ATP6AP1, MAP3K1, PCNA, EGR3, MYC, RB1, STAT4, CDK4, CCNE2, CCND1, STAT3, PIK3CB, PTK2B, BIRC5, CCNA2, CREB3L2, TP53, NFATC3, STAT6	422	145	6879	2.13599	0.0980441	0.0957281
KEGG_PATHWAY	hsa04114:Oocyte meiosis	15	0.00747497	-2.12639	CPEB1, RPS6KA2, FBXO5, ESPL1, PPP2R5A, ITPR1, CDK1, CCNB2, CCNE2, CAMK2D, BUB1, CDC20, AURKA, ITPR2, SGO1	422	111	6879	2.20283	0.21096	0.205977
KEGG_PATHWAY	hsa03410:Base excision repair	7	0.0136919	-1.86353	POLD1, PCNA, POLE2, POLD2, PARP4, POLE, NEIL3	422	33	6879	3.45778	0.347775	0.33956
KEGG_PATHWAY	hsa04330:Notch signaling pathway	8	0.0255338	-1.59289	MFNG, DLL1, NOTCH2, MAML1, DVL3, NOTCH1, DVL2, LFNG	422	48	6879	2.71682	0.589598	0.57567
KEGG_PATHWAY	hsa03440:Homologous recombination	6	0.0294467	-1.53096	POLD1, RAD51, BRCA2, RAD51B, POLD2, EME1	422	29	6879	3.37261	0.623289	0.608566
KEGG_PATHWAY	hsa05212:Pancreatic cancer	9	0.0435155	-1.36136	RAD51, CCND1, RALB, STAT3, PIK3CB, BRCA2, RB1, CDK4, TP53	422	65	6879	2.25705	0.794921	0.776143
KEGG_PATHWAY	hsa04723:Retrograde endocannabinoid signaling	12	0.0438145	-1.35838	GABRA1, KCNJ3, PLCB3, GNG5, SLC17A7, RIMS1, KCNJ9, ITPR1, ITPR2, GRM1, GABRB2, GNG13	422	101	6879	1.93675	0.794921	0.776143
KEGG_PATHWAY	hsa03430:Mismatch repair	5	0.0485365	-1.31393	POLD1, RFC4, EXO1, PCNA, POLD2	422	23	6879	3.54368	0.821885	0.80247
KEGG_PATHWAY	hsa04925:Aldosterone synthesis and secretion	10	0.0581536	-1.23542	CAMK2D, CAMK4, PLCB3, PRKD3, ITPR1, ITPR2, ORAI1, CREB3L2, PRKD2, KCNK9	422	81	6879	2.01246	0.877813	0.857078
KEGG_PATHWAY	hsa04725:Cholinergic synapse	12	0.0762996	-1.11748	CAMK2D, CHRM3, CAMK4, KCNJ3, PIK3CB, PLCB3, KCNJ12, GNG5, ITPR1, ITPR2, CREB3L2, GNG13	422	111	6879	1.76226	0.877813	0.857078
KEGG_PATHWAY	hsa04310:Wnt signaling pathway	14	0.0789637	-1.10257	ROCK2, NKD1, PLCB3, VANGL2, TCF7L1, DVL2, MYC, CAMK2D, CCND1, DVL3, LRP5, PRICKLE2, TP53, NFATC3	422	138	6879	1.65372	0.877813	0.857078
KEGG_PATHWAY	hsa04915:Estrogen signaling pathway	11	0.0799589	-1.09713	KCNJ3, PIK3CB, PLCB3, KCNJ9, PRKCD, ITPR1, MMP2, ITPR2, GRM1, CREB3L2, HSPA8	422	99	6879	1.81122	0.877813	0.857078
KEGG_PATHWAY	hsa04080:Neuroactive ligand-receptor interaction	24	0.0821276	-1.08551	CHRM3, GABRA1, P2RX7, F2R, GPR50, HTR5A, HRH2, VIPR2, ADRB1, TSHR, HTR7, GRM2, GRM1, GRM8, S1PR2, TACR2, CALCRL, GLRA2, EDNRA, GRIN2A, TACR3, MC4R, GABRB2, CRHR2	422	277	6879	1.41236	0.877813	0.857078
KEGG_PATHWAY	hsa04360:Axon guidance	13	0.0875057	-1.05796	ROCK2, EPHB4, PAK2, PAK6, NGEF, RND1, SRGAP1, NCK1, EPHA6, RASA1, CXCR4, LIMK1, NFATC3	422	127	6879	1.6686	0.877813	0.857078
KEGG_PATHWAY	hsa04724:Glutamatergic synapse	12	0.0884029	-1.05353	KCNJ3, PLCB3, GNG5, SLC17A7, ITPR1, GRM2, GRIN2A, ITPR2, GRM1, GRM8, GNG13, SHANK2	422	114	6879	1.71589	0.877813	0.857078
KEGG_PATHWAY	hsa00240:Pyrimidine metabolism	11	0.0887102	-1.05203	POLD1, PRIM1, POLA1, RRM2, TYMS, POLE2, POLD2, PRIM2, POLE, DTYMK, TK1	422	101	6879	1.77535	0.877813	0.857078
KEGG_PATHWAY	hsa04919:Thyroid hormone signaling pathway	12	0.0926843	-1.03299	CCND1, NOTCH2, PIK3CB, PLCB3, HIF1A, NOTCH1, PLCD1, ITGAV, ATP1B1, MYC, TP53, PDPK1	422	115	6879	1.70097	0.877813	0.857078
KEGG_PATHWAY	hsa04670:Leukocyte transendothelial migration	12	0.0926843	-1.03299	ROCK2, VCAM1, PIK3CB, PTK2B, THY1, CXCR4, PXN, NCF4, MMP2, CTNNA1, CD99, JAM2	422	115	6879	1.70097	0.877813	0.857078
KEGG_PATHWAY	hsa05213:Endometrial cancer	7	0.0960803	-1.01737	CCND1, PIK3CB, TCF7L1, CTNNA1, MYC, TP53, PDPK1	422	52	6879	2.19436	0.877813	0.857078
KEGG_PATHWAY	hsa05166:HTLV-I infection	22	0.0974592	-1.01118	MAP3K1, PCNA, ETS1, CDKN2C, POLD2, DVL2, MYC, PDGFRA, RB1, CDK4, POLD1, CCND1, CDC20, VCAM1, PIK3CB, POLE2, DVL3, POLE, CHEK1, CHEK2, TP53, NFATC3	422	254	6879	1.41189	0.877813	0.857078
KEGG_PATHWAY	hsa05216:Thyroid cancer	5	0.098041	-1.00859	CCND1, TPM3, TCF7L1, MYC, TP53	422	29	6879	2.81051	0.877813	0.857078

## Sheet: 14dpl-LGG_shared_genes
Category	Term	Count	PValue	log10(Pvalue)	Genes	List.Total	Pop.Hits	Pop.Total	Fold.Enrichment	Benjamini	FDR
KEGG_PATHWAY	hsa04330:Notch signaling pathway	7	0.000560538	-3.25139	MFNG, DLL1, NOTCH2, DVL3, NOTCH1, DVL2, LFNG	151	48	6879	6.64363	0.111547	0.111547
KEGG_PATHWAY	hsa04020:Calcium signaling pathway	12	0.00175824	-2.75492	CAMK2D, F2R, HTR5A, ADRB1, HRH2, HTR7, EDNRA, HTR2A, HTR2C, GRIN2A, PDGFRA, PHKG1	151	179	6879	3.05405	0.174945	0.174945
KEGG_PATHWAY	hsa04080:Neuroactive ligand-receptor interaction	14	0.00725061	-2.13963	F2R, HTR5A, HRH2, VIPR2, ADRB1, HTR7, GLRB, S1PR2, CALCRL, EDNRA, HTR2A, HTR2C, GRIN2A, CRHR2	151	277	6879	2.30248	0.452149	0.452149
KEGG_PATHWAY	hsa04310:Wnt signaling pathway	9	0.0103413	-1.98543	CAMK2D, CCND1, ROCK2, NKD1, VANGL2, TCF7L1, DVL3, LRP5, DVL2	151	138	6879	2.97106	0.452149	0.452149
KEGG_PATHWAY	hsa05200:Pathways in cancer	17	0.0113605	-1.9446	ROCK2, F2R, TCF7L1, GLI2, CTNNA1, DVL2, PDGFRA, CCND1, COL4A1, HIF1A, CXCR4, EDNRA, DVL3, SMO, MMP2, GNA13, GNG13	151	393	6879	1.97063	0.452149	0.452149
KEGG_PATHWAY	hsa04110:Cell cycle	8	0.0183721	-1.73584	CCND1, BUB1, MCM3, MCM7, CCNA2, CDK1, MCM5, GADD45G	151	124	6879	2.93912	0.609343	0.609343
KEGG_PATHWAY	hsa05231:Choline metabolism in cancer	7	0.0226166	-1.64557	DGKH, SLC44A2, WASF2, HIF1A, PIP5K1B, PDGFRA, DGKZ	151	101	6879	3.15737	0.642956	0.642956
KEGG_PATHWAY	hsa04024:cAMP signaling pathway	10	0.0287223	-1.54178	CAMK2D, ROCK2, F2R, ADRB1, VIPR2, CNGA3, BDNF, EDNRA, ATP1B1, GRIN2A	151	198	6879	2.30082	0.654139	0.654139
KEGG_PATHWAY	hsa05217:Basal cell carcinoma	5	0.0295842	-1.52894	TCF7L1, GLI2, DVL3, SMO, DVL2	151	54	6879	4.21818	0.654139	0.654139
KEGG_PATHWAY	hsa04810:Regulation of actin cytoskeleton	10	0.0396559	-1.40169	ROCK2, F2R, ITGA9, PFN1, WASF2, PAK2, PIP5K1B, GNA13, PDGFRA, BAIAP2	151	210	6879	2.16935	0.772514	0.772514
KEGG_PATHWAY	hsa03030:DNA replication	4	0.0429531	-1.36701	MCM3, MCM7, POLE, MCM5	151	36	6879	5.06181	0.772514	0.772514
KEGG_PATHWAY	hsa04390:Hippo signaling pathway	8	0.0465837	-1.33177	CCND1, AJUBA, TCF7L1, GLI2, DVL3, CTNNA1, BMP7, DVL2	151	151	6879	2.41358	0.772514	0.772514
KEGG_PATHWAY	hsa04115:p53 signaling pathway	5	0.0578825	-1.23745	CCND1, GTSE1, CD82, CDK1, GADD45G	151	67	6879	3.39972	0.833232	0.833232
KEGG_PATHWAY	hsa04360:Axon guidance	7	0.0586193	-1.23196	ROCK2, EPHA6, CXCR4, DPYSL2, EPHB4, PAK2, NGEF	151	127	6879	2.51098	0.833232	0.833232
KEGG_PATHWAY	hsa04520:Adherens junction	5	0.0687293	-1.16286	WASF2, TCF7L1, CTNNA1, NECTIN1, BAIAP2	151	71	6879	3.20819	0.911809	0.911809

## Sheet: 1dpl-GBM_shared_genes
Category	Term	Count	PValue	log10(Pvalue)	Genes	List.Total	Pop.Hits	Pop.Total	Fold.Enrichment	Benjamini	FDR
KEGG_PATHWAY	hsa03010:Ribosome	68	6.95232e-23	-22.1579	RPS8, RPS13, RPLP2, RPS7, RPL13A, RPL9, RPS21, RPS9, RPS16, RPL34, RPL13, RPL23, MRPL23, RPS15, RPL35, MRPL11, FAU, RPSA, RPS28, RPL12, RPS6, UBA52, RPS18, MRPL32, RPL19, RPL29, RPS14, RPL21, RPS11, RPL35A, RPS3, MRPL13, MRPL35, RPL23A, RPL27, RPS12, RPL17, RPL37A, MRPL3, RPL36, RPL39, RPL22L1, RPS10, RPL6, RPL30, RPS2, RPS23, RPL18, RPL38, RPS19, MRPS6, RPL14, RPLP1, RPS4X, RPS25, RPS5, RPL4, RP…	980	136	6879	3.50969	1.87018e-20	1.57818e-20
KEGG_PATHWAY	hsa04010:MAPK signaling pathway	69	5.82712e-08	-7.23455	RAPGEF2, FGF13, KRAS, CACNA2D1, FGFR2, MAPK8IP2, CACNA2D2, TAOK2, RRAS, CACNA1I, CACNB1, RPS6KA5, DUSP8, CACNA1F, DDIT3, MAPK8, MAP3K1, TGFBR1, JUND, MAPKAPK3, GADD45A, CACNA1A, MAP3K8, PDGFRB, CACNA1D, CACNA1E, NF1, MAP3K14, PPM1A, RASGRF1, PPP3R1, MAPKAPK2, MAPK8IP1, CACNB2, CACNB3, RAP1B, GNA12, IKBKB, MAPK10, RASGRF2, RASGRP3, PRKCA, ARRB1, MYC, MAP2K4, NRAS, FGF14, MAPT, TP53, GNG12, MAPK1, …	980	253	6879	1.91438	7.83747e-06	6.61378e-06
KEGG_PATHWAY	hsa04727:GABAergic synapse	30	2.79286e-06	-5.55395	GLS, GNAI3, PRKCA, GNG7, PLCL1, GABRA3, GABRD, CACNA1F, NSF, GABRA4, GNG12, GABRA1, CACNA1C, GAD1, GABBR2, CACNA1A, GABRG2, GNG5, GABBR1, CACNA1D, KCNJ6, SLC6A1, GNB4, GPHN, GNAO1, GABRA5, GABRR1, PRKCB, ADCY1, GABRB2	980	85	6879	2.47743	0.000250427	0.000211327
KEGG_PATHWAY	hsa04723:Retrograde endocannabinoid signaling	33	5.30509e-06	-5.27531	MAPK10, SLC17A7, SLC17A6, GNAI3, KCNJ9, PRKCA, GNG7, GABRA3, GABRD, RIMS1, GRM5, PLCB1, ABHD6, CACNA1F, GABRA4, GNG12, GABRA1, MAPK1, MAPK8, CACNA1C, CACNA1A, GABRG2, GNG5, CACNA1D, KCNJ6, MAPK13, GNB4, GNAO1, GABRA5, GABRR1, PRKCB, ADCY1, GABRB2	980	101	6879	2.29346	0.000321096	0.000270962
KEGG_PATHWAY	hsa04810:Regulation of actin cytoskeleton	55	5.96833e-06	-5.22415	ROCK2, F2R, FGF13, ARPC5, KRAS, FGFR2, BAIAP2, ARHGEF7, RRAS, ARPC1B, ITGB2, WAS, TIAM1, MSN, ARPC3, PDGFRB, CHRM2, ABI2, PIK3CB, WASF2, PIP4K2A, PIP5K1C, GNA12, PIK3CG, ITGB8, CYFIP1, PIK3R5, PAK6, FN1, ITGA9, NCKAP1, SSH1, NRAS, ENAH, MYL9, PDGFC, PPP1R12C, FGF14, ACTG1, GNG12, CHRM3, MAPK1, PFN1, RAC2, BRAF, FGF12, APC, PDGFD, IQGAP2, CYFIP2, ITGAE, WASF1, PXN, GNA13, IQGAP1	980	210	6879	1.83841	0.000321096	0.000270962
KEGG_PATHWAY	hsa03030:DNA replication	17	1.11002e-05	-4.95467	RFC4, RFC3, PCNA, SSBP1, MCM3, MCM2, RFC2, RNASEH2A, RPA2, MCM6, MCM4, POLD1, PRIM2, MCM5, RPA3, POLA2, LIG1	980	36	6879	3.31471	0.000497658	0.000419957
KEGG_PATHWAY	hsa04015:Rap1 signaling pathway	53	2.76117e-05	-4.55891	F2R, RAPGEF2, RAP1GAP, FGF13, KRAS, GNAI3, LCP2, FGFR2, MAGI3, ID1, RRAS, ITGB2, GRIN2A, DOCK4, EFNA5, VEGFA, TIAM1, PDGFRB, PRKCZ, PIK3CB, ADCY1, RAP1B, PIK3CG, MAGI1, SIPA1, PIK3R5, NGFR, RASGRP3, SIPA1L1, PRKCA, MAGI2, RAPGEF5, GRIN2B, TLN2, RALGDS, NRAS, PDGFC, FGF14, ANGPT2, PLCB1, ACTG1, MAPK1, PFN1, RAC2, VEGFB, BRAF, FGF12, PDGFD, MAPK13, GNAO1, AKT3, VASP, PRKCB	980	210	6879	1.77156	0.00106108	0.000895406
KEGG_PATHWAY	hsa05032:Morphine addiction	29	3.71864e-05	-4.42962	GNAI3, KCNJ9, PRKCA, GNG7, ARRB1, PDE8B, GABRA3, GABRD, DRD1, GABRA4, GNG12, GABRA1, GABBR2, CACNA1A, GABRG2, GNG5, GABBR1, KCNJ6, OPRM1, PDE1C, PDE4A, GNB4, GNAO1, GABRA5, GABRR1, GRK3, PRKCB, ADCY1, GABRB2	980	91	6879	2.23695	0.00125039	0.00105516
KEGG_PATHWAY	hsa04930:Type II diabetes mellitus	19	5.23934e-05	-4.28072	MAPK10, IKBKB, PIK3CG, MAPK1, MAPK8, CACNA1C, HKDC1, MTOR, CACNA1A, PIK3R5, HK2, PRKCE, CACNA1D, CACNA1E, PRKCZ, PIK3CB, PKLR, SOCS2, SOCS1	980	48	6879	2.77851	0.00156598	0.00132148
KEGG_PATHWAY	hsa04910:Insulin signaling pathway	38	6.73802e-05	-4.17147	IKBKB, MAPK10, PIK3CG, SHC3, KRAS, PRKAR1A, PIK3R5, PRKAA2, HK2, GSK3B, PRKAR2B, SHC1, PCK2, SOCS2, NRAS, ACACA, SOCS1, MAPK1, MAPK8, PRKAB1, HKDC1, SH2B2, MTOR, SREBF1, PYGM, PRKAR1B, BRAF, PRKCZ, FASN, PIK3CB, AKT3, RPS6, EIF4EBP1, PKLR, ELK1, TRIP10, RPTOR, INPPL1	980	138	6879	1.93287	0.00181253	0.00152953
KEGG_PATHWAY	hsa04724:Glutamatergic synapse	33	8.01084e-05	-4.09632	DLG4, GLS, SLC17A7, SLC17A6, GNAI3, PRKCA, GRM3, GNG7, GRIN2B, SHANK3, GRIN2A, GRM5, PLCB1, GNG12, MAPK1, CACNA1C, CACNA1A, GRIN2C, GNG5, SLC1A2, GRM2, CACNA1D, GNB4, GNAO1, TRPC1, PPP3R1, GRK3, PRKCB, ADCY1, SLC1A6, HOMER3, GRIK4, SHANK2	980	114	6879	2.03193	0.00195702	0.00165146
KEGG_PATHWAY	hsa04713:Circadian entrainment	29	8.73019e-05	-4.05898	PER3, GNAI3, KCNJ9, PRKCA, GNG7, GUCY1A2, GRIN2B, CACNA1I, GRIN2A, RPS6KA5, CAMK2B, PLCB1, GNG12, MAPK1, NOS1, CACNA1C, PER2, GRIN2C, GNG5, GUCY1B1, CACNA1D, KCNJ6, RYR1, GNB4, NOS1AP, GNAO1, CAMK2A, PRKCB, ADCY1	980	95	6879	2.14276	0.00195702	0.00165146
KEGG_PATHWAY	hsa04725:Cholinergic synapse	32	0.00011434	-3.9418	PIK3CG, KRAS, GNAI3, PIK3R5, PRKCA, GNG7, KCNJ12, NRAS, CAMK2B, ACHE, PLCB1, CACNA1F, GNG12, CHRM3, CAMK4, MAPK1, CACNA1C, CACNA1A, GNG5, KCNQ2, CACNA1D, CHRM2, KCNJ6, GNB4, GNAO1, PIK3CB, AKT3, CAMK2A, KCNQ5, KCNQ3, PRKCB, ADCY1	980	111	6879	2.02361	0.0023087	0.00194823
KEGG_PATHWAY	hsa04012:ErbB signaling pathway	27	0.000120155	-3.92026	MAPK10, PIK3CG, SHC3, KRAS, PIK3R5, PAK6, PRKCA, GSK3B, MYC, MAP2K4, SHC1, NRAS, CAMK2B, MAPK1, MAPK8, STAT5A, MTOR, ERBB4, BRAF, NCK1, PIK3CB, AKT3, EIF4EBP1, CAMK2A, ELK1, PRKCB, ABL2	980	87	6879	2.17843	0.0023087	0.00194823
KEGG_PATHWAY	hsa04921:Oxytocin signaling pathway	39	0.00019798	-3.70338	ROCK2, KRAS, GNAI3, KCNJ9, PRKAA2, CACNA2D1, PRKCA, GUCY1A2, CACNA2D2, KCNJ12, CAMK1, NRAS, MYL9, CACNB1, PPP1R12C, CAMK2B, PLCB1, ACTG1, CACNA1F, CAMK4, MAPK1, PRKAB1, CACNA1C, GUCY1B1, CACNA2D4, CACNA1D, KCNJ6, CACNA2D3, RYR1, GNAO1, CAMKK1, CAMK2A, ELK1, PPP3R1, CAMK1D, PRKCB, CACNB2, ADCY1, CACNB3	980	150	6879	1.82504	0.00355045	0.0029961
KEGG_PATHWAY	hsa04014:Ras signaling pathway	53	0.000213889	-3.66981	SHC3, FGF13, KRAS, HTR7, FGFR2, SHC1, RRAS, GRIN2A, EFNA5, MAPK8, VEGFA, TIAM1, GNG5, PDGFRB, NF1, KSR2, GNB4, PIK3CB, RASGRF1, RGL1, RAP1B, IKBKB, MAPK10, PIK3CG, RASGRF2, PIK3R5, NGFR, RASGRP3, PAK6, PRKCA, GNG7, RAPGEF5, GRIN2B, RALGDS, NRAS, PDGFC, FGF14, ANGPT2, GAB2, GNG12, MAPK1, RAC2, RASA2, VEGFB, FGF12, RASGRP4, PDGFD, KSR1, AKT3, ZAP70, ELK1, PRKCB, ABL2	980	226	6879	1.64614	0.00359601	0.00303455
KEGG_PATHWAY	hsa04150:mTOR signaling pathway	20	0.000264658	-3.57732	IKBKB, PIK3CG, MAPK1, ULK1, CAB39, MTOR, RPS6KA2, PIK3R5, PRKAA2, PRKCA, PTEN, BRAF, PIK3CB, AKT3, RPS6, EIF4EBP1, RICTOR, PRKCB, DDIT4, RPTOR	980	58	6879	2.42048	0.00418782	0.00353396
KEGG_PATHWAY	hsa04730:Long-term depression	20	0.000431441	-3.36508	GNAZ, NOS1, MAPK1, CACNA1A, KRAS, GUCY1B1, GNAI3, PRKCA, BRAF, PPP2CA, GUCY1A2, RYR1, GNAO1, NRAS, LYN, GNA13, PLCB1, PRKCB, GNA12, CRHR1	980	60	6879	2.3398	0.0062174	0.00524666
KEGG_PATHWAY	hsa05161:Hepatitis B	37	0.000439147	-3.35739	IRF7, ATP6AP1, IKBKB, MAPK10, PIK3CG, CDK6, KRAS, EGR3, IKBKE, PIK3R5, DDB2, PRKCA, MYC, MAP2K4, PTEN, CDK4, STAT3, PTK2B, MMP9, NRAS, BAX, TP53, MAPK1, MAPK8, MAP3K1, TGFBR1, PCNA, STAT5A, FADD, LAMTOR5, MYD88, PIK3CB, APAF1, AKT3, ELK1, PRKCB, HSPG2	980	145	6879	1.79115	0.0062174	0.00524666
KEGG_PATHWAY	hsa05212:Pancreatic cancer	21	0.000469124	-3.32871	MAPK10, IKBKB, PIK3CG, MAPK1, VEGFA, MAPK8, TGFBR1, CDK6, RAC2, SMAD3, KRAS, PIK3R5, BRAF, CDK4, RAD51, STAT3, PIK3CB, AKT3, RALGDS, TGFBR2, TP53	980	65	6879	2.2678	0.00630972	0.00532456
KEGG_PATHWAY	hsa04071:Sphingolipid signaling pathway	32	0.000520788	-3.28334	MAPK10, ROCK2, PIK3CG, ASAH1, PPP2R3A, SPTLC3, KRAS, GNAI3, PIK3R5, CERS5, PRKCA, PPP2CA, PTEN, NRAS, BAX, PLCB1, TP53, GAB2, MAPK1, MAPK8, RAC2, PPP2R2C, PRKCE, PRKCZ, MAPK13, SGPL1, PIK3CB, AKT3, SGPP1, GNA13, PRKCB, GNA12	980	120	6879	1.87184	0.00667105	0.00562947
KEGG_PATHWAY	hsa05231:Choline metabolism in cancer	28	0.000661586	-3.17941	DGKH, MAPK10, PIK3CG, KRAS, PIK3R5, PRKCA, DGKE, DGKZ, HIF1A, RALGDS, NRAS, PDGFC, DGKG, MAPK1, MAPK8, WAS, MTOR, RAC2, PDGFRB, DGKB, PDGFD, PIK3CB, WASF2, AKT3, EIF4EBP1, PIP5K1C, WASF1, PRKCB	980	101	6879	1.94597	0.00808939	0.00682637
KEGG_PATHWAY	hsa05214:Glioma	20	0.0012906	-2.88921	PIK3CG, MAPK1, SHC3, CDK6, MTOR, KRAS, PIK3R5, PDGFRB, PRKCA, PTEN, BRAF, CDK4, PIK3CB, SHC1, AKT3, CAMK2A, NRAS, CAMK2B, PRKCB, TP53	980	65	6879	2.15981	0.0150944	0.0127376
KEGG_PATHWAY	hsa04360:Axon guidance	32	0.00144116	-2.84129	ROCK2, SEMA5A, UNC5D, LRRC4, SRGAP3, KRAS, GNAI3, SEMA6B, PAK6, NGEF, GSK3B, SEMA4F, LRRC4C, CXCR4, DPYSL2, NRAS, SEMA4G, PLXNA3, UNC5C, EFNA5, MAPK1, SEMA3F, RAC2, PLXNA2, PLXNB3, UNC5A, L1CAM, PLXNA1, NCK1, EPHA6, SLIT1, PPP3R1	980	127	6879	1.76866	0.016153	0.0136309
KEGG_PATHWAY	hsa04144:Endocytosis	52	0.00186623	-2.72904	CYTH1, EHD2, ARPC5, SMAD3, ZFYVE9, FGFR2, CXCR4, SH3GL2, ARPC1B, RAB11FIP3, IQSEC2, SH3GL3, ARFGEF2, MVB12A, EHD3, TGFBR1, WAS, ARPC3, SPG21, ARF3, SH3GLB1, AGAP1, NEDD4L, PRKCZ, IQSEC3, IQSEC1, RAB22A, PIP5K1C, RAB11FIP2, CYTH4, CAV1, SH3GLB2, BIN1, RBSN, ARRB1, MVB12B, PIP5KL1, RAB8A, SNX5, PSD, WWP1, EPS15L1, AGAP3, DNM1, SNX3, AP2B1, RAB11FIP5, VPS25, KIF5B, TGFBR2, GRK3, CHMP1B	980	241	6879	1.51456	0.0193194	0.016303
KEGG_PATHWAY	hsa05210:Colorectal cancer	19	0.00186731	-2.72878	MAPK10, PIK3CG, MAPK1, MAPK8, TGFBR1, RAC2, SMAD3, KRAS, PIK3R5, GSK3B, MYC, BRAF, APC, PIK3CB, AKT3, RALGDS, TGFBR2, BAX, TP53	980	62	6879	2.1511	0.0193194	0.016303
KEGG_PATHWAY	hsa04024:cAMP signaling pathway	44	0.00247278	-2.60681	MAPK10, ROCK2, F2R, PIK3CG, GNAI3, PIK3R5, HTR4, GRIN2B, RRAS, MYL9, GRIN2A, ATP1B1, CAMK2B, CACNA1F, DRD1, CAMK4, MAPK1, MAPK8, CACNA1C, ADRB1, TIAM1, GABBR2, RAC2, GRIN2C, GABBR1, CACNA1D, CHRM2, SSTR1, BRAF, PDE4A, HCN4, HHIP, PIK3CB, AKT3, CAMK2A, ATP2B2, EDNRA, SSTR2, PPARA, ATP1A1, ADCY1, ABCC4, RAP1B, NPY1R	980	198	6879	1.55986	0.023961	0.0202199
KEGG_PATHWAY	hsa04670:Leukocyte transendothelial migration	29	0.00249408	-2.60309	ROCK2, PIK3CG, SIPA1, GNAI3, PIK3R5, PRKCA, NCF2, PTK2B, MMP9, CXCR4, MYL9, ITGB2, NCF4, ACTG1, MSN, RAC2, THY1, PECAM1, CD99, MAPK13, PIK3CB, RHOH, PXN, ARHGAP5, VASP, ESAM, PRKCB, CYBA, RAP1B	980	115	6879	1.77011	0.023961	0.0202199
KEGG_PATHWAY	hsa05033:Nicotine addiction	14	0.00262313	-2.58118	GABRA1, CACNA1A, GABRG2, SLC17A7, GRIN2C, SLC17A6, GRIN2B, GABRA3, GABRD, GABRA5, GABRR1, GRIN2A, GABRB2, GABRA4	980	40	6879	2.45679	0.0243318	0.0205328
KEGG_PATHWAY	hsa05230:Central carbon metabolism in cancer	19	0.00275332	-2.56014	PIK3CG, MAPK1, HKDC1, GLS, MTOR, KRAS, NTRK3, PIK3R5, PDGFRB, FGFR2, HK2, SIRT3, PTEN, MYC, PIK3CB, AKT3, HIF1A, NRAS, TP53	980	64	6879	2.08388	0.0246881	0.0208334
KEGG_PATHWAY	hsa03430:Mismatch repair	10	0.00288452	-2.53993	POLD1, RFC4, EXO1, RFC3, PCNA, SSBP1, RFC2, RPA2, RPA3, LIG1	980	23	6879	3.05191	0.0250302	0.0211222
KEGG_PATHWAY	hsa04728:Dopaminergic synapse	31	0.00331487	-2.47953	MAPK10, PPP2R3A, GNAI3, KCNJ9, PRKCA, GSK3B, GNG7, CLOCK, PPP2CA, GRIN2B, GRIN2A, CAMK2B, PLCB1, DRD1, GNG12, MAPK8, CACNA1C, GSK3A, CACNA1A, PPP2R2C, GNG5, CACNA1D, KCNJ6, MAPK13, GNB4, GNAO1, AKT3, KIF5B, CAMK2A, GNAL, PRKCB	980	128	6879	1.70001	0.0278657	0.0235149
KEGG_PATHWAY	hsa04020:Calcium signaling pathway	40	0.00362145	-2.44112	TNNC2, F2R, HTR7, PRKCA, HTR4, ADRA1B, SLC25A5, PTK2B, CACNA1I, GRIN2A, GRM5, CAMK2B, PLCB1, CACNA1F, DRD1, CHRM3, CAMK4, NOS1, CACNA1C, ADRB1, CACNA1A, SLC8A2, GRIN2C, PDGFRB, CACNA1D, CACNA1E, CHRM2, PDE1C, ERBB4, RYR1, CAMK2A, SLC8A3, ATP2B2, EDNRA, SLC8A1, GNAL, PPP3R1, NTSR1, PRKCB, ADCY1	980	179	6879	1.56858	0.0295203	0.0249112
KEGG_PATHWAY	hsa04720:Long-term potentiation	19	0.00396512	-2.40174	CAMK4, MAPK1, CACNA1C, RPS6KA2, KRAS, GRIN2C, PRKCA, BRAF, GRIN2B, CAMK2A, NRAS, GRIN2A, GRM5, CAMK2B, PPP3R1, PLCB1, ADCY1, PRKCB, RAP1B	980	66	6879	2.02073	0.0313711	0.026473
KEGG_PATHWAY	hsa05220:Chronic myeloid leukemia	20	0.00464561	-2.33296	IKBKB, PIK3CG, MAPK1, BCR, TGFBR1, SHC3, STAT5A, CDK6, KRAS, PIK3R5, MYC, BRAF, CDK4, PIK3CB, SHC1, AKT3, TGFBR2, NRAS, TP53, GAB2	980	72	6879	1.94983	0.035607	0.0300475
KEGG_PATHWAY	hsa04722:Neurotrophin signaling pathway	29	0.00476525	-2.32191	IKBKB, MAPK10, PIK3CG, SHC3, KRAS, NTRK3, PIK3R5, NGFR, GSK3B, SHC1, NRAS, BAX, RPS6KA5, CAMK2B, TP53, CAMK4, MAPK1, MAPK8, MAP3K1, SH2B2, RPS6KA2, SH2B1, BRAF, MAPK13, PIK3CB, AKT3, CAMK2A, MAPKAPK2, RAP1B	980	120	6879	1.69635	0.035607	0.0300475
KEGG_PATHWAY	hsa05205:Proteoglycans in cancer	43	0.00522464	-2.28194	ROCK2, PIK3CG, CAV1, HCLS1, KRAS, PTPN6, ANK3, PIK3R5, PRKCA, FN1, VMP1, MYC, STAT3, HIF1A, MMP9, NRAS, RRAS, PPP1R12C, CAMK2B, ACTG1, TP53, MAPK1, VEGFA, FZD7, TIAM1, MSN, MTOR, FZD2, ERBB4, BRAF, MAPK13, FLNA, PIK3CB, AKT3, RPS6, CAMK2A, GPC1, PXN, ELK1, PRKCB, HSPG2, DCN, IQGAP1	980	200	6879	1.50917	0.0379846	0.0320539
KEGG_PATHWAY	hsa04721:Synaptic vesicle cycle	18	0.00566769	-2.24659	UNC13A, NAPA, DNM1, CACNA1A, SLC17A7, SLC17A6, ATP6V0E1, RAB3A, STX1B, ATP6V1G1, ATP6V1E1, AP2B1, STXBP1, CPLX2, RIMS1, ATP6V0C, TCIRG1, NSF	980	63	6879	2.00554	0.0401213	0.033857
KEGG_PATHWAY	hsa04666:Fc gamma R-mediated phagocytosis	22	0.00595676	-2.22499	PIK3CG, MAPK1, WAS, ARPC5, RAC2, ARPC3, PIK3R5, BIN1, PRKCE, PRKCA, PIK3CB, WASF2, AKT3, PIP5K1C, WASF1, ARPC1B, HCK, VASP, LYN, PRKCB, GAB2, INPPL1	980	84	6879	1.83841	0.0410863	0.0346714
KEGG_PATHWAY	hsa04510:Focal adhesion	43	0.00888264	-2.05146	MAPK10, ROCK2, PIK3CG, SHC3, CAV1, COL5A1, ITGB8, PIK3R5, PAK6, PRKCA, GSK3B, FN1, TNC, PTEN, ITGA9, SHC1, TLN2, COL1A2, MYL9, PDGFC, PPP1R12C, ACTG1, MAPK1, MAPK8, VEGFA, RAC2, THBS3, PARVG, PDGFRB, VEGFB, BRAF, COL5A2, PDGFD, FLNA, PIK3CB, AKT3, RASGRF1, PXN, ARHGAP5, VASP, ELK1, PRKCB, RAP1B	980	206	6879	1.46521	0.0586763	0.0495149
KEGG_PATHWAY	hsa04917:Prolactin signaling pathway	19	0.00899741	-2.04588	MAPK10, PIK3CG, MAPK1, MAPK8, SHC3, STAT5A, CISH, KRAS, PIK3R5, GSK3B, MAPK13, STAT3, PIK3CB, SHC1, AKT3, SOCS2, IRF1, NRAS, SOCS1	980	71	6879	1.87843	0.0586763	0.0495149
KEGG_PATHWAY	hsa04070:Phosphatidylinositol signaling system	24	0.00926879	-2.03298	DGKH, PIK3CG, PI4KA, PIK3R5, PIK3C2B, DGKB, PRKCA, DGKE, PTEN, DGKZ, SYNJ1, PIP4P1, INPP4A, ITPK1, PIK3CB, PIP4K2A, PPIP5K1, PIP5K1C, INPP5J, DGKG, IP6K1, PLCB1, PRKCB, INPPL1	980	98	6879	1.71903	0.0586763	0.0495149
KEGG_PATHWAY	hsa04370:VEGF signaling pathway	17	0.00956114	-2.01949	PIK3CG, MAPK1, VEGFA, RAC2, MAPKAPK3, KRAS, PIK3R5, PRKCA, MAPK13, PIK3CB, AKT3, NRAS, PXN, MAPKAPK2, PPP3R1, PRKCB, HSPB1	980	61	6879	1.95622	0.0586763	0.0495149
KEGG_PATHWAY	hsa05219:Bladder cancer	13	0.00959761	-2.01784	MAPK1, VEGFA, KRAS, TYMP, DAPK1, MMP1, MYC, BRAF, CDK4, MMP9, NRAS, RPS6KA5, TP53	980	41	6879	2.22566	0.0586763	0.0495149
KEGG_PATHWAY	hsa05142:Chagas disease (American trypanosomiasis)	25	0.00987487	-2.00547	IKBKB, MAPK10, PIK3CG, SMAD3, GNAI3, PIK3R5, PPP2CA, MAP2K4, PLCB1, SERPINE1, MAPK1, MAPK8, TGFBR1, C1QA, PPP2R2C, C1QC, FADD, MAPK13, MYD88, GNAO1, PIK3CB, AKT3, TGFBR2, GNAL, ADCY1	980	104	6879	1.68735	0.0590298	0.0498132
KEGG_PATHWAY	hsa04664:Fc epsilon RI signaling pathway	18	0.0126219	-1.89888	MAPK10, PIK3CG, MAPK1, MAPK8, RAC2, KRAS, LCP2, PIK3R5, PRKCA, MAP2K4, MAPK13, BTK, PIK3CB, AKT3, NRAS, LYN, PRKCB, GAB2	980	68	6879	1.85807	0.0738107	0.0622864
KEGG_PATHWAY	hsa05200:Pathways in cancer	72	0.0172457	-1.76332	ROCK2, F2R, BCR, FGF13, SMAD3, KRAS, GLI2, GNAI3, FGFR2, GSK3B, CKS1B, PTEN, ARHGEF11, CDK4, STAT3, BMP2, MMP9, CXCR4, BAX, MAPK8, VEGFA, TGFBR1, FZD7, GNG5, FZD2, PDGFRB, RAD51, GNB4, CSF3R, SKP2, PIK3CB, ADCY1, GNA12, IKBKB, MAPK10, PIK3CG, CDK6, PLEKHG5, PIK3R5, RASGRP3, PRKCA, FN1, GNG7, MYC, HIF1A, RALGDS, NRAS, FGF14, PLCB1, TP53, GNG12, MAPK1, STAT5A, MTOR, RAC2, SPI1, LPAR6, DAPK1, VEGFB,…	980	393	6879	1.28599	0.0987041	0.083293
KEGG_PATHWAY	hsa05218:Melanoma	18	0.0192632	-1.71527	PIK3CG, MAPK1, CDK6, FGF13, KRAS, PIK3R5, PDGFRB, PTEN, BRAF, FGF12, CDK4, PDGFD, PIK3CB, AKT3, NRAS, PDGFC, FGF14, TP53	980	71	6879	1.77956	0.107954	0.0910988
KEGG_PATHWAY	hsa04726:Serotonergic synapse	25	0.0215846	-1.66586	KRAS, HTR7, GNAI3, KCNJ9, PRKCA, HTR4, GNG7, TPH2, NRAS, PLCB1, CACNA1F, GNG12, MAPK1, CACNA1C, CACNA1A, GNG5, APP, CACNA1D, KCNJ6, BRAF, GNB4, GNAO1, TRPC1, PRKCB, GABRB2	980	111	6879	1.58094	0.118495	0.0999938
KEGG_PATHWAY	hsa05221:Acute myeloid leukemia	15	0.0224106	-1.64955	IKBKB, PIK3CG, MAPK1, STAT5A, MTOR, KRAS, PIK3R5, SPI1, MYC, BRAF, STAT3, PIK3CB, AKT3, EIF4EBP1, NRAS	980	56	6879	1.88019	0.120569	0.101744
KEGG_PATHWAY	hsa05412:Arrhythmogenic right ventricular cardiomyopathy (ARVC)	17	0.0233044	-1.63256	CACNA1C, DSP, ITGB8, CACNA2D4, CACNA2D1, CACNA1D, CACNA2D3, DAG1, CACNA2D2, DMD, SGCD, ITGA9, CACNB1, CACNB2, ACTG1, CACNA1F, CACNB3	980	67	6879	1.78104	0.121343	0.102397
KEGG_PATHWAY	hsa05100:Bacterial invasion of epithelial cells	19	0.0234566	-1.62973	PIK3CG, SHC3, CAV1, HCLS1, WAS, ARPC5, DNM1, ARPC3, PIK3R5, FN1, PIK3CB, WASF2, SHC1, SEPTIN2, WASF1, ARPC1B, PXN, SEPTIN9, ACTG1	980	78	6879	1.70985	0.121343	0.102397
KEGG_PATHWAY	hsa04350:TGF-beta signaling pathway	20	0.0247523	-1.60638	MAPK1, TGFBR1, TFDP1, ACVR1B, LTBP1, SMAD3, SMAD5, ZFYVE9, ID3, FST, MYC, PPP2CA, TGIF1, E2F5, BMPR2, BMP2, ACVR2A, ID1, TGFBR2, DCN	980	84	6879	1.67128	0.12563	0.106015
KEGG_PATHWAY	hsa05110:Vibrio cholerae infection	14	0.0272175	-1.56515	ATP6AP1, PDIA4, SEC61B, ATP6V0E1, PRKCA, ATP6V1G1, ATP6V1E1, SEC61A1, SEC61G, KDELR2, ATP6V0C, PRKCB, ACTG1, TCIRG1	980	52	6879	1.88984	0.133118	0.112334
KEGG_PATHWAY	hsa05213:Endometrial cancer	14	0.0272175	-1.56515	PIK3CG, MAPK1, KRAS, PIK3R5, GSK3B, PTEN, MYC, BRAF, APC, PIK3CB, AKT3, NRAS, ELK1, TP53	980	52	6879	1.88984	0.133118	0.112334
KEGG_PATHWAY	hsa04662:B cell receptor signaling pathway	17	0.0302123	-1.51982	IKBKB, PIK3CG, MAPK1, MALT1, RAC2, KRAS, PIK3R5, PTPN6, RASGRP3, GSK3B, BTK, PIK3CB, AKT3, NRAS, LYN, PPP3R1, INPPL1	980	69	6879	1.72941	0.145127	0.122468
KEGG_PATHWAY	hsa04960:Aldosterone-regulated sodium reabsorption	11	0.0422093	-1.37459	MAPK1, PIK3CG, PIK3CB, KRAS, PIK3R5, NR3C2, ATP1B1, PRKCA, ATP1A1, PRKCB, NEDD4L	980	39	6879	1.97983	0.197243	0.166447
KEGG_PATHWAY	hsa04611:Platelet activation	27	0.0425283	-1.37132	ROCK2, F2R, PIK3CG, COL5A1, GNAI3, LCP2, PIK3R5, GUCY1A2, TLN2, TBXAS1, COL1A2, PLCB1, ACTG1, MAPK1, GUCY1B1, FERMT3, COL5A2, PRKCZ, MAPK13, BTK, PIK3CB, AKT3, VASP, LYN, GNA13, ADCY1, RAP1B	980	130	6879	1.45787	0.197243	0.166447
KEGG_PATHWAY	hsa05410:Hypertrophic cardiomyopathy (HCM)	18	0.0448464	-1.34827	PRKAB1, CACNA1C, ITGB8, CACNA2D4, PRKAA2, CACNA2D1, CACNA1D, CACNA2D3, DAG1, CACNA2D2, DMD, SGCD, ITGA9, CACNB1, CACNB2, ACTG1, CACNA1F, CACNB3	980	78	6879	1.61986	0.204469	0.172545
KEGG_PATHWAY	hsa05223:Non-small cell lung cancer	14	0.0474109	-1.32412	PIK3CG, MAPK1, CDK6, KRAS, PIK3R5, PRKCA, BRAF, CDK4, PIK3CB, AKT3, EML4, NRAS, PRKCB, TP53	980	56	6879	1.75485	0.208631	0.176056
KEGG_PATHWAY	hsa04062:Chemokine signaling pathway	36	0.0475633	-1.32273	IKBKB, ROCK2, PIK3CG, SHC3, KRAS, GNAI3, PIK3R5, CCR9, GSK3B, GNG7, ARRB1, STAT3, SHC1, PTK2B, CXCR4, NRAS, HCK, PLCB1, GNG12, MAPK1, WAS, TIAM1, GSK3A, RAC2, GNG5, BRAF, PRKCZ, GNB4, PIK3CB, AKT3, FGR, PXN, LYN, GRK3, ADCY1, RAP1B	980	186	6879	1.35859	0.208631	0.176056
KEGG_PATHWAY	hsa04066:HIF-1 signaling pathway	21	0.0480858	-1.31798	ENO3, PIK3CG, MAPK1, VEGFA, HKDC1, HMOX1, MTOR, PIK3R5, HK2, PRKCA, STAT3, PIK3CB, AKT3, RPS6, EIF4EBP1, CAMK2A, HIF1A, CAMK2B, ANGPT2, PRKCB, SERPINE1	980	96	6879	1.53549	0.208631	0.176056
KEGG_PATHWAY	hsa04931:Insulin resistance	23	0.049263	-1.30748	MAPK10, IKBKB, PIK3CG, PRKAB1, MAPK8, MLX, MTOR, RPS6KA2, SREBF1, PIK3R5, PRKAA2, PYGM, PRKCE, GSK3B, PPARGC1B, PTEN, PRKCZ, STAT3, PIK3CB, AKT3, PCK2, PPARA, TRIB3	980	108	6879	1.49487	0.2101	0.177296
KEGG_PATHWAY	hsa04261:Adrenergic signaling in cardiomyocytes	28	0.0499866	-1.30115	PPP2R3A, GNAI3, CACNA2D1, PRKCA, PPP2CA, CACNA2D2, ADRA1B, CACNB1, ATP1B1, RPS6KA5, CAMK2B, PLCB1, CACNA1F, MAPK1, CACNA1C, ADRB1, PPP2R2C, CACNA2D4, CACNA1D, CACNA2D3, MAPK13, AKT3, CAMK2A, ATP2B2, ATP1A1, CACNB2, ADCY1, CACNB3	980	138	6879	1.42422	0.2101	0.177296
KEGG_PATHWAY	hsa04912:GnRH signaling pathway	20	0.0520653	-1.28345	MAPK10, MAP3K1, MAPK1, MAPK8, CACNA1C, KRAS, PRKCA, CACNA1D, MAP2K4, MMP14, MAPK13, PTK2B, CAMK2A, NRAS, CAMK2B, ELK1, PLCB1, ADCY1, PRKCB, CACNA1F	980	91	6879	1.54272	0.21547	0.181828
KEGG_PATHWAY	hsa04919:Thyroid hormone signaling pathway	24	0.0540357	-1.26732	THRA, PIK3CG, MAPK1, MTOR, KRAS, PIK3R5, PRKCA, GSK3B, RCAN2, MYC, NOTCH3, NCOA2, NCOA1, SLC16A10, PIK3CB, AKT3, HIF1A, NRAS, ATP1B1, ATP1A1, PLCB1, PRKCB, ACTG1, TP53	980	115	6879	1.46492	0.220237	0.18585
KEGG_PATHWAY	hsa04260:Cardiac muscle contraction	17	0.0598733	-1.22277	CACNA1C, CACNA2D4, CACNA2D1, MT-CO2, CACNA1D, CACNA2D3, MT-CO1, CACNA2D2, MT-CYB, MT-CO3, UQCRQ, ATP1B1, CACNB1, ATP1A1, CACNB2, CACNA1F, CACNB3	980	75	6879	1.59106	0.240387	0.202854
KEGG_PATHWAY	hsa04914:Progesterone-mediated oocyte maturation	19	0.0620689	-1.20713	CPEB3, MAPK10, PIK3CG, MAPK1, MAPK8, CPEB1, RPS6KA2, KRAS, CDC26, PIK3R5, GNAI3, CPEB2, BRAF, MAPK13, ANAPC11, PIK3CB, AKT3, MAD2L1, ADCY1	980	87	6879	1.53297	0.244117	0.206002
KEGG_PATHWAY	hsa05131:Shigellosis	15	0.0629984	-1.20067	MAPK10, IKBKB, ROCK2, MAPK1, MAPK8, PFN1, HCLS1, WAS, ARPC5, ARPC3, MAPK13, WASF2, WASF1, ARPC1B, ACTG1	980	64	6879	1.64517	0.244117	0.206002
KEGG_PATHWAY	hsa04710:Circadian rhythm	9	0.0635249	-1.19706	PRKAB1, PER2, PER3, PRKAA2, CRY2, RORB, CRY1, CLOCK, NR1D1	980	31	6879	2.03789	0.244117	0.206002
KEGG_PATHWAY	hsa04540:Gap junction	19	0.0681196	-1.16673	MAPK1, ADRB1, TUBB, TUBB6, KRAS, GUCY1B1, GNAI3, PDGFRB, PRKCA, GUCY1A2, PDGFD, TUBB2B, NRAS, PDGFC, GRM5, PLCB1, ADCY1, PRKCB, DRD1	980	88	6879	1.51555	0.254108	0.214433
KEGG_PATHWAY	hsa04110:Cell cycle	25	0.0686537	-1.16334	CDK6, MCM2, SMAD3, MCM6, GSK3B, MYC, CDK4, E2F5, ANAPC11, CDC20, ORC1, CDC6, TP53, TFDP1, PCNA, MCM3, GADD45A, CDC26, MCM4, YWHAG, SKP2, WEE1, MAD2L1, MCM5, CHEK2	980	124	6879	1.4152	0.254108	0.214433
KEGG_PATHWAY	hsa04660:T cell receptor signaling pathway	21	0.0689587	-1.16141	IKBKB, PIK3CG, MAPK1, MALT1, KRAS, LCP2, PIK3R5, MAP3K8, PTPN6, PAK6, GSK3B, CDK4, MAPK13, NCK1, PIK3CB, ZAP70, AKT3, MAP3K14, NRAS, PPP3R1, CD4	980	100	6879	1.47407	0.254108	0.214433
KEGG_PATHWAY	hsa05132:Salmonella infection	18	0.0739813	-1.13088	MAPK10, ROCK2, MAPK1, MAPK8, PFN1, WAS, ARPC5, ARPC3, MAPK13, FLNA, MYD88, WASF2, WASF1, ARPC1B, PKN1, ACTG1, KLC1, KLC3	980	83	6879	1.52228	0.268932	0.226943
KEGG_PATHWAY	hsa04141:Protein processing in endoplasmic reticulum	32	0.0785837	-1.10467	MAPK10, CANX, DNAJC5, DAD1, SEC61B, HSPA5, HSPA4L, SEC61A1, SEC61G, NFE2L2, PDIA3, DNAJC1, BAX, PDIA6, DDIT3, MAPK8, RPN1, PDIA4, TRAM1, LMAN1, DDOST, DNAJB1, SSR3, DNAJC5G, SEC13, DNAJB12, UBXN6, PRKN, SSR4, P4HB, DNAJA1, SSR2	980	169	6879	1.32911	0.281853	0.237847
KEGG_PATHWAY	hsa05414:Dilated cardiomyopathy	18	0.0810403	-1.0913	CACNA1C, ADRB1, ITGB8, CACNA2D4, CACNA2D1, CACNA1D, CACNA2D3, DAG1, CACNA2D2, DMD, SGCD, ITGA9, CACNB1, ADCY1, CACNB2, ACTG1, CACNA1F, CACNB3	980	84	6879	1.50415	0.28684	0.242055
KEGG_PATHWAY	hsa04068:FoxO signaling pathway	26	0.0907807	-1.04201	BCL6, IKBKB, MAPK10, PIK3CG, SMAD3, KRAS, PIK3R5, PRKAA2, PTEN, STAT3, PCK2, NRAS, PLK2, MAPK1, MAPK8, PRKAB1, TGFBR1, GADD45A, BRAF, MAPK13, SKP2, PIK3CB, AKT3, TGFBR2, NLK, HOMER3	980	134	6879	1.36197	0.317143	0.267626
KEGG_PATHWAY	hsa03060:Protein export	7	0.0973762	-1.01155	SRP9, IMMP2L, SEC61B, HSPA5, SEC11A, SEC61A1, SEC61G	980	23	6879	2.13634	0.335823	0.28339

## Sheet: 3dpl-GBM_shared_genes
Category	Term	Count	PValue	log10(Pvalue)	Genes	List.Total	Pop.Hits	Pop.Total	Fold.Enrichment	Benjamini	FDR
KEGG_PATHWAY	hsa03010:Ribosome	60	3.95837e-24	-23.4025	RPS8, RPS13, RPLP2, RPS7, RPL13A, RPS21, RPS9, RPS16, RPL34, RPL13, RPL23, RPS15, RPL35, FAU, RPSA, RPS28, RPL12, RPS6, UBA52, RPS18, RPL19, RPL29, RPS14, RPL21, RPS11, RPL35A, RPS3, RPL23A, RPL27, RPS12, RPL17, RPL37A, RPL36, RPL39, RPL22L1, RPS10, RPL6, RPL30, RPS2, RPS23, RPL18, RPL38, RPS19, RPL14, RPLP1, RPS4X, RPS25, RPS5, RPL4, RPL10A, RPS3A, RPL7, RPL24, RPS27L, RPL5, RPLP0, RPS17, RPL10,…	707	136	6879	4.29258	1.08855e-21	1.00147e-21
KEGG_PATHWAY	hsa03030:DNA replication	21	1.94299e-11	-10.7115	RFC4, PCNA, MCM3, PRIM1, MCM2, RFC2, RNASEH2A, RPA2, MCM6, POLD2, MCM4, POLD1, POLA1, POLE2, PRIM2, MCM7, POLE, MCM5, RPA3, POLA2, LIG1	707	36	6879	5.67574	2.67161e-09	2.45788e-09
KEGG_PATHWAY	hsa04110:Cell cycle	39	2.3098e-10	-9.63643	CDKN2C, MCM2, SMAD3, MCM6, DBF4, CCNB1, TTK, CDK1, MYC, RB1, CCNB2, CDK4, E2F5, CDC20, ORC1, E2F1, CHEK1, PTTG1, CDC6, TP53, TGFB2, PCNA, RBL1, MCM3, ORC6, GADD45A, ESPL1, MCM4, CCND1, BUB1, SKP2, WEE1, MCM7, MAD2L1, CCNA2, CDC45, MCM5, CHEK2, CDKN1A	707	124	6879	3.06019	2.11732e-08	1.94793e-08
KEGG_PATHWAY	hsa05200:Pathways in cancer	74	2.04572e-07	-6.68915	ROCK2, F2R, ETS1, FGF13, SMAD3, GLI2, COL4A2, LAMB2, CKS1B, RB1, DVL2, LAMA2, CDK4, WNT7A, WNT7B, STAT3, COL4A1, MMP9, CXCR4, ERBB2, MMP2, FZD6, GNG13, MAPK8, FZD7, BRCA2, GNG5, FZD2, LAMB1, PDGFRB, ITGAV, ADCY2, RAD51, CCND1, CSF3R, SKP2, PIK3CB, FASLG, PTK2, CASP3, LAMB4, SMO, GNA12, CDKN1A, PIK3CG, LPAR1, TCF7L1, PIK3R5, FN1, MYC, LPAR2, ITGA3, HIF1A, E2F1, BIRC5, FGF14, TP53, TGFB2, GNG12, KI…	707	393	6879	1.83208	1.40643e-05	1.29392e-05
KEGG_PATHWAY	hsa05205:Proteoglycans in cancer	43	3.91668e-06	-5.40708	ROCK2, PIK3CG, HPSE, HCLS1, KDR, PTPN6, PIK3R5, FN1, VMP1, MYC, WNT7A, WNT7B, STAT3, HIF1A, MMP9, ERBB2, RRAS, MMP2, ITGB3, ACTG1, TP53, TGFB2, FZD6, FZD7, MSN, FZD2, ITGAV, ITPR1, FLNA, CCND1, ITGB5, FASLG, PIK3CB, RPS6, PTK2, CASP3, PXN, SMO, HSPG2, DCN, CDKN1A, PDPK1, IQGAP1	707	200	6879	2.09192	0.000215417	0.000198184
KEGG_PATHWAY	hsa05161:Hepatitis B	34	7.29502e-06	-5.13697	IRF7, ATP6AP1, PIK3CG, EGR3, IKBKE, PIK3R5, MYC, RB1, STAT4, CDK4, CASP10, CREB3L3, STAT3, PTK2B, MMP9, E2F1, BIRC5, TP53, TGFB2, MAPK8, MAP3K1, PCNA, FADD, IFIH1, CCND1, MYD88, FASLG, PIK3CB, APAF1, CASP3, CCNA2, CREB3L2, HSPG2, CDKN1A	707	145	6879	2.28148	0.000334355	0.000307607
KEGG_PATHWAY	hsa05222:Small cell lung cancer	23	3.06566e-05	-4.51348	PIK3CG, LAMB1, PIK3R5, COL4A2, ITGAV, LAMB2, FN1, MYC, LAMA2, RB1, CKS1B, CDK4, ITGA3, CCND1, SKP2, COL4A1, PIK3CB, CKS2, APAF1, PTK2, E2F1, LAMB4, TP53	707	85	6879	2.63278	0.00120437	0.00110802
KEGG_PATHWAY	hsa04510:Focal adhesion	41	4.59699e-05	-4.33753	ROCK2, PIK3CG, COL1A1, COL5A1, KDR, PIK3R5, COL4A2, LAMB2, PAK6, FN1, DOCK1, LAMA2, ITGA3, COL4A1, ERBB2, MYL9, ITGB3, ACTG1, MAPK8, RAC2, VWF, LAMB1, PARVG, PDGFRB, ITGAV, COL2A1, ZYX, PGF, PDGFD, FLNA, CCND1, ITGB5, PIK3CB, RASGRF1, PTK2, COL6A3, PXN, VASP, LAMB4, RAP1B, PDPK1	707	206	6879	1.93652	0.00158022	0.0014538
KEGG_PATHWAY	hsa04810:Regulation of actin cytoskeleton	41	7.21122e-05	-4.14199	ROCK2, F2R, PIK3CG, FGF13, ARPC5, CYFIP1, PIK3R5, PAK6, FN1, DOCK1, ITGA3, BAIAP2, RRAS, ARPC1B, MYL9, ITGB2, FGF14, ITGB3, ACTG1, GNG12, CHRM3, IQGAP3, WAS, PFN1, MSN, RAC2, DIAPH3, PDGFRB, ITGAV, PDGFD, IQGAP2, ITGB5, PIK3CB, WASF2, ITGAE, PTK2, PXN, PIP5K1B, GNA13, GNA12, IQGAP1	707	210	6879	1.89964	0.00208929	0.00192215
KEGG_PATHWAY	hsa04670:Leukocyte transendothelial migration	27	7.59743e-05	-4.11933	ROCK2, F11R, PIK3CG, PIK3R5, CLDN10, JAM2, VCAM1, PTK2B, MMP9, CXCR4, MYL9, ITGB2, NCF4, MMP2, ACTG1, NCF1, MSN, RAC2, THY1, PECAM1, CD99, PIK3CB, PTK2, PXN, VASP, CYBA, RAP1B	707	115	6879	2.2844	0.00208929	0.00192215
KEGG_PATHWAY	hsa05166:HTLV-I infection	45	0.000310811	-3.5075	CANX, PIK3CG, ETS1, CDKN2C, SMAD3, PIK3R5, POLD2, DVL2, MYC, RB1, CDK4, WNT7A, CDC20, POLD1, VCAM1, WNT7B, MYB, IL15RA, RRAS, E2F1, ITGB2, CHEK1, POLE, IL2RB, PTTG1, TP53, TGFB2, FZD6, MAP3K1, PCNA, FZD7, FZD2, SPI1, PDGFRB, ADCY2, CCND1, PIK3CB, MAP3K14, POLE2, TERT, TGFBR2, IL2RG, MAD2L1, CHEK2, CDKN1A	707	254	6879	1.72379	0.00777027	0.00714865
KEGG_PATHWAY	hsa05212:Pancreatic cancer	17	0.000669732	-3.1741	PIK3CG, MAPK8, BRCA2, RAC2, SMAD3, PIK3R5, RB1, CDK4, RAD51, CCND1, STAT3, PIK3CB, TGFBR2, ERBB2, E2F1, TP53, TGFB2	707	65	6879	2.54473	0.015348	0.0141202
KEGG_PATHWAY	hsa04151:PI3K-Akt signaling pathway	55	0.000908807	-3.04153	F2R, COL1A1, COL5A1, FGF13, COL4A2, LAMB2, LAMA2, CDK4, CREB3L3, MYB, COL4A1, IL2RB, PKN1, GNG13, GNG5, LAMB1, PDGFRB, ITGAV, COL2A1, CCND1, CSF3R, ITGB5, PIK3CB, FASLG, RPS6, PTK2, LAMB4, CREB3L2, CDKN1A, PDPK1, PIK3CG, ANGPT1, LPAR1, KDR, PIK3R5, NGFR, FN1, MYC, LPAR2, ITGA3, PCK2, BCL2L11, FGF14, ITGB3, TP53, GNG12, KIT, PKN2, VWF, LPAR6, PGF, PDGFD, COL6A3, IL2RG, PKN3	707	345	6879	1.55113	0.0192248	0.0176868
KEGG_PATHWAY	hsa03430:Mismatch repair	9	0.00142599	-2.84588	POLD1, RFC4, EXO1, PCNA, RFC2, RPA2, POLD2, RPA3, LIG1	707	23	6879	3.80733	0.0280106	0.0257697
KEGG_PATHWAY	hsa03440:Homologous recombination	10	0.00181419	-2.74132	POLD1, RAD51, RAD54L, RAD54B, BRCA2, RAD51B, RPA2, POLD2, EME1, RPA3	707	29	6879	3.35512	0.0332602	0.0305994
KEGG_PATHWAY	hsa03460:Fanconi anemia pathway	14	0.00216776	-2.66399	FAAP24, POLN, BRCA2, RPA2, FANCC, CENPS, EME1, UBE2T, RAD51, CENPX, FANCA, FANCI, FANCD2, RPA3	707	53	6879	2.57015	0.0372583	0.0342777
KEGG_PATHWAY	hsa04115:p53 signaling pathway	16	0.00270905	-2.56718	GTSE1, GADD45A, CCNG1, STEAP3, CCNB1, CDK1, CCNB2, CDK4, CCND1, APAF1, RRM2, CASP3, CHEK1, CHEK2, TP53, CDKN1A	707	67	6879	2.32354	0.0417013	0.0383652
KEGG_PATHWAY	hsa04512:ECM-receptor interaction	19	0.00272954	-2.56391	SV2B, COL1A1, COL5A1, VWF, LAMB1, COL4A2, ITGAV, LAMB2, COL2A1, HMMR, FN1, LAMA2, ITGA3, ITGB5, COL4A1, COL6A3, LAMB4, ITGB3, HSPG2	707	87	6879	2.12491	0.0417013	0.0383652
KEGG_PATHWAY	hsa04611:Platelet activation	25	0.00300772	-2.52176	ROCK2, F2R, PIK3CG, COL1A1, COL5A1, LCP2, PIK3R5, P2RY1, PTGIR, ORAI1, ITGB3, ACTG1, PLCB3, VWF, FERMT3, ITPR1, COL2A1, PLA2G4A, ADCY2, BTK, PIK3CB, VASP, LYN, GNA13, RAP1B	707	130	6879	1.87112	0.0435327	0.0400501
KEGG_PATHWAY	hsa04666:Fc gamma R-mediated phagocytosis	18	0.00449291	-2.34747	PIK3CG, NCF1, WAS, ARPC5, RAC2, PIK3R5, BIN1, PIK3CB, WASF2, PLPP2, HCK, ARPC1B, PRKCD, VASP, LYN, PIP5K1B, MARCKS, INPPL1	707	84	6879	2.08497	0.0617775	0.0568353
KEGG_PATHWAY	hsa05219:Bladder cancer	11	0.00714195	-2.14618	CCND1, MMP9, ERBB2, E2F1, MMP2, MMP1, MYC, RB1, CDK4, TP53, CDKN1A	707	41	6879	2.61045	0.0935255	0.0860435
KEGG_PATHWAY	hsa04015:Rap1 signaling pathway	34	0.00813666	-2.08955	F2R, PIK3CG, ANGPT1, LPAR1, FGF13, KDR, LCP2, PIK3R5, NGFR, LPAR2, MAGI3, ARAP3, P2RY1, ID1, RRAS, ITGB2, GRIN2A, FGF14, ITGB3, PARD6A, ACTG1, KIT, PFN1, PLCB3, RAC2, PRKD3, PDGFRB, PGF, ADCY2, PDGFD, PIK3CB, VASP, PRKD2, RAP1B	707	210	6879	1.57531	0.101708	0.0935716
KEGG_PATHWAY	hsa05210:Colorectal cancer	14	0.00903881	-2.04389	PIK3CG, MAPK8, RAC2, SMAD3, TCF7L1, PIK3R5, MYC, CCND1, PIK3CB, CASP3, TGFBR2, BIRC5, TP53, TGFB2	707	62	6879	2.19706	0.108073	0.0994269
KEGG_PATHWAY	hsa05146:Amoebiasis	20	0.0107172	-1.96992	SERPINB1, PIK3CG, COL1A1, COL5A1, PLCB3, LAMB1, PIK3R5, COL4A2, LAMB2, COL2A1, FN1, LAMA2, COL4A1, PIK3CB, PTK2, CASP3, ITGB2, LAMB4, TGFB2, HSPB1	707	106	6879	1.83582	0.122802	0.112978
KEGG_PATHWAY	hsa04668:TNF signaling pathway	20	0.0118228	-1.92728	RIPK3, SELE, PIK3CG, MAPK8, CASP7, PIK3R5, MAP3K8, FADD, CEBPB, MMP14, CASP10, CREB3L3, VCAM1, RIPK1, PIK3CB, MAP3K14, MMP9, CASP3, CREB3L2, NOD2	707	107	6879	1.81866	0.130051	0.119647
KEGG_PATHWAY	hsa00240:Pyrimidine metabolism	19	0.013548	-1.86812	PRIM1, DCTD, TYMS, DCTPP1, POLD2, DTYMK, CANT1, POLD1, RRM1, PNP, POLA1, RRM2, UMPS, POLE2, PRIM2, POLE, TK1, NME1, POLA2	707	101	6879	1.83037	0.143297	0.131833
KEGG_PATHWAY	hsa03410:Base excision repair	9	0.0160792	-1.79374	POLD1, PCNA, PARP2, POLE2, POLD2, PARP4, POLE, NEIL3, LIG1	707	33	6879	2.65359	0.15963	0.14686
KEGG_PATHWAY	hsa04010:MAPK signaling pathway	38	0.0162532	-1.78906	BDNF, FGF13, RASGRF2, CACNA2D1, MYC, RASA1, RRAS, MAP3K20, FGF14, TP53, TGFB2, GNG12, DDIT3, MAPK8, MAP3K1, JUND, GADD45A, RPS6KA2, RAC2, MAPKAPK3, MAP3K8, PDGFRB, DUSP6, PLA2G4A, FLNA, DUSP2, FASLG, HSPA2, MAP3K14, RASGRF1, CASP3, TGFBR2, MECOM, CACNB2, GNA12, CACNB3, RAP1B, HSPB1	707	253	6879	1.4614	0.15963	0.14686
KEGG_PATHWAY	hsa04068:FoxO signaling pathway	23	0.0173023	-1.7619	BCL6, PIK3CG, MAPK8, GADD45A, SMAD3, PIK3R5, CCNB1, PRKAG2, GRM1, CCNB2, CCND1, SKP2, STAT3, FASLG, PIK3CB, PCK2, TGFBR2, BCL2L11, PLK4, TGFB2, CDKN1A, PLK2, PDPK1	707	134	6879	1.67005	0.164074	0.150948
KEGG_PATHWAY	hsa04020:Calcium signaling pathway	28	0.0256672	-1.59062	F2R, HTR5A, HTR7, PLCD1, GRM1, ADRA1A, TACR2, PTAFR, PTK2B, ERBB2, GRIN2A, ORAI1, PHKG1, CHRM3, CAMK4, HRH2, ADRB1, PLCB3, GRIN2C, PDGFRB, ITPR1, PDE1C, RYR1, ADCY2, EDNRA, SLC8A1, AGTR1, TACR3	707	179	6879	1.52199	0.230316	0.211891
KEGG_PATHWAY	hsa05100:Bacterial invasion of epithelial cells	15	0.0259629	-1.58565	PIK3CG, HCLS1, WAS, ARPC5, PIK3R5, FN1, DOCK1, PIK3CB, WASF2, PTK2, SEPTIN2, ARPC1B, PXN, SEPTIN9, ACTG1	707	78	6879	1.87112	0.230316	0.211891
KEGG_PATHWAY	hsa04024:cAMP signaling pathway	30	0.0303873	-1.51731	ROCK2, F2R, PIK3CG, BDNF, PIK3R5, CREB3L3, ARAP3, RRAS, MYL9, GRIN2A, ATP1B1, ORAI1, HTR1A, CAMK4, MAPK8, ADRB1, TSHR, RAC2, GRIN2C, SSTR1, HCN4, ADCY2, HHIP, PIK3CB, EDNRA, CREB3L2, GRIA3, ABCC4, RAP1B, NPY	707	198	6879	1.47422	0.261141	0.24025
KEGG_PATHWAY	hsa04080:Neuroactive ligand-receptor interaction	39	0.0372523	-1.42885	F2R, HTR5A, LPAR1, RXFP2, HTR7, LTB4R, CHRNA2, C3AR1, GRM1, GRM8, LPAR2, ADRA1A, TACR2, CALCRL, PTAFR, GLRA2, P2RY1, PTGIR, GRIN2A, HTR1A, CHRM3, GABRA1, HRH2, ADRB1, TSHR, GRIN2C, LPAR6, GRM2, SSTR1, S1PR2, HCRTR2, EDNRA, AGTR1, NPFFR1, TACR3, MC4R, GABRB2, GRIA3, CRHR2	707	277	6879	1.36991	0.310436	0.285601
KEGG_PATHWAY	hsa05217:Basal cell carcinoma	11	0.0455487	-1.34152	WNT7B, FZD7, HHIP, FZD2, TCF7L1, GLI2, SMO, DVL2, WNT7A, TP53, FZD6	707	54	6879	1.98201	0.367105	0.337737
KEGG_PATHWAY	hsa03420:Nucleotide excision repair	10	0.0467225	-1.33047	POLD1, RFC4, PCNA, POLE2, RFC2, RPA2, POLD2, POLE, RPA3, LIG1	707	47	6879	2.07018	0.367105	0.337737
KEGG_PATHWAY	hsa04210:Apoptosis	12	0.0487075	-1.3124	PIK3CG, RIPK1, FASLG, CASP7, PIK3CB, APAF1, MAP3K14, PIK3R5, CASP3, FADD, TP53, CASP10	707	62	6879	1.8832	0.372071	0.342306
KEGG_PATHWAY	hsa04520:Adherens junction	13	0.0559798	-1.25197	PTPRJ, WAS, RAC2, SMAD3, TCF7L1, PTPN6, NECTIN1, BAIAP2, WASF2, TGFBR2, ERBB2, ACTG1, IQGAP1	707	71	6879	1.78152	0.401221	0.369123
KEGG_PATHWAY	hsa05218:Melanoma	13	0.0559798	-1.25197	PIK3CG, FGF13, PIK3R5, PDGFRB, RB1, CDK4, PDGFD, CCND1, PIK3CB, E2F1, FGF14, TP53, CDKN1A	707	71	6879	1.78152	0.401221	0.369123
KEGG_PATHWAY	hsa04390:Hippo signaling pathway	23	0.0569004	-1.24488	AJUBA, FZD7, SMAD3, FZD2, TCF7L1, GLI2, LATS2, TEAD3, DVL2, MYC, WNT7A, CCND1, YAP1, WNT7B, WWTR1, ID1, TGFBR2, ITGB2, BIRC5, PARD6A, ACTG1, TGFB2, FZD6	707	151	6879	1.48203	0.401221	0.369123
KEGG_PATHWAY	hsa05131:Shigellosis	12	0.0592177	-1.22755	ROCK2, MAPK8, PFN1, HCLS1, WASF2, WAS, ARPC5, ARPC1B, NOD1, NOD2, DOCK1, ACTG1	707	64	6879	1.82435	0.404666	0.372293
KEGG_PATHWAY	hsa05220:Chronic myeloid leukemia	13	0.0612052	-1.21321	PIK3CG, PIK3R5, MYC, RB1, CDK4, CCND1, PIK3CB, TGFBR2, E2F1, MECOM, TP53, TGFB2, CDKN1A	707	72	6879	1.75678	0.404666	0.372293
KEGG_PATHWAY	hsa04141:Protein processing in endoplasmic reticulum	25	0.0618036	-1.20899	CANX, DAD1, SEC61B, HSPA5, SEC61A1, SEC24D, SEC61G, NFE2L2, PDIA3, PDIA6, DDIT3, MAPK8, PDIA4, TRAM1, DDOST, DNAJB1, SSR3, DNAJC5G, HSPA2, PRKN, TXNDC5, SSR4, P4HB, SSR1, SSR2	707	169	6879	1.43933	0.404666	0.372293
KEGG_PATHWAY	hsa05215:Prostate cancer	15	0.0633631	-1.19816	PIK3CG, TCF7L1, PIK3R5, PDGFRB, RB1, PDGFD, CCND1, CREB3L3, PIK3CB, ERBB2, E2F1, CREB3L2, TP53, CDKN1A, PDPK1	707	88	6879	1.6585	0.405229	0.372811
KEGG_PATHWAY	hsa04915:Estrogen signaling pathway	16	0.0791089	-1.10177	PIK3CG, KCNJ3, PLCB3, PIK3R5, KCNJ9, ITPR1, FKBP5, GRM1, ADCY2, CREB3L3, HSPA2, PIK3CB, MMP9, PRKCD, MMP2, CREB3L2	707	99	6879	1.5725	0.494431	0.454876
KEGG_PATHWAY	hsa04014:Ras signaling pathway	31	0.0833792	-1.07894	PIK3CG, ANGPT1, ETS1, FGF13, RASGRF2, HTR7, KDR, PIK3R5, NGFR, PAK6, RASA1, RRAS, GRIN2A, FGF14, GNG13, GNG12, KIT, MAPK8, RAC2, GNG5, PDGFRB, PLA2G4A, PGF, PDGFD, KSR1, FASLG, PIK3CB, ZAP70, RASGRF1, RGL1, RAP1B	707	226	6879	1.33462	0.50954	0.468776
KEGG_PATHWAY	hsa05231:Choline metabolism in cancer	16	0.0905568	-1.04308	DGKH, PCYT1B, PIK3CG, MAPK8, WAS, RAC2, PIK3R5, PDGFRB, PLA2G4A, PDGFD, PIK3CB, WASF2, HIF1A, PLPP2, PIP5K1B, PDPK1	707	101	6879	1.54136	0.541372	0.498062

## Sheet: 14dpl-GBM_shared_genes
Category	Term	Count	PValue	log10(Pvalue)	Genes	List.Total	Pop.Hits	Pop.Total	Fold.Enrichment	Benjamini	FDR
KEGG_PATHWAY	hsa05200:Pathways in cancer	34	2.77674e-05	-4.55646	ROCK2, F2R, SMAD3, TCF7L1, PIK3R5, GLI2, FN1, DVL2, LAMA2, WNT7B, COL4A1, HIF1A, CXCR4, ERBB2, E2F1, MMP2, GNG13, MAPK8, FZD7, RAC2, FZD2, LAMB1, SPI1, PDGFRB, LPAR6, CCND1, CSF3R, SKP2, FZD1, EDNRA, CASP3, SMO, AGTR1, GNA13	273	393	6879	2.17996	0.00646981	0.0061366
KEGG_PATHWAY	hsa04110:Cell cycle	16	0.00010112	-3.99516	MCM3, MCM2, SMAD3, MCM6, MCM4, CDK1, CCND1, BUB1, SKP2, E2F1, CDKN1C, MCM7, MAD2L1, CCNA2, MCM5, CDC6	273	124	6879	3.25133	0.0117805	0.0111738
KEGG_PATHWAY	hsa04810:Regulation of actin cytoskeleton	21	0.000221828	-3.65398	IQGAP3, ROCK2, F2R, PFN1, WAS, RAC2, CYFIP1, PIK3R5, PDGFRB, DIAPH3, FN1, BAIAP2, ITGA9, ITGB5, WASF2, ITGAE, ARPC1B, ITGB2, PIP5K1B, GNA13, IQGAP1	273	210	6879	2.51978	0.0172287	0.0163413
KEGG_PATHWAY	hsa05205:Proteoglycans in cancer	20	0.000328785	-3.48309	ROCK2, FZD7, HCLS1, FZD2, PIK3R5, PTPN6, ANK1, FN1, CCND1, ITGB5, WNT7B, FZD1, HIF1A, CASP3, ERBB2, SMO, MMP2, HSPG2, DCN, IQGAP1	273	200	6879	2.51978	0.0191517	0.0181653
KEGG_PATHWAY	hsa04520:Adherens junction	11	0.00043236	-3.36415	PTPRJ, WASF2, WAS, RAC2, SMAD3, TCF7L1, PTPN6, ERBB2, NECTIN1, BAIAP2, IQGAP1	273	71	6879	3.90388	0.020148	0.0191103
KEGG_PATHWAY	hsa04512:ECM-receptor interaction	12	0.000583279	-3.23412	COL6A1, ITGA9, ITGB5, COL1A1, COL4A1, LAMB1, COL1A2, COL6A3, COL2A1, FN1, LAMA2, HSPG2	273	87	6879	3.47556	0.0226507	0.0214841
KEGG_PATHWAY	hsa04974:Protein digestion and absorption	11	0.00234257	-2.63031	COL6A1, SLC7A7, COL1A1, COL4A1, SLC3A2, COL1A2, COL6A3, SLC1A5, COL2A1, ATP1B1, COL18A1	273	88	6879	3.14973	0.0665344	0.0631077
KEGG_PATHWAY	hsa04390:Hippo signaling pathway	15	0.00249643	-2.60268	AJUBA, FZD7, SMAD3, FZD2, TCF7L1, GLI2, TEAD3, DVL2, CCND1, YAP1, WNT7B, WWTR1, FZD1, ITGB2, SERPINE1	273	151	6879	2.50309	0.0665344	0.0631077
KEGG_PATHWAY	hsa03030:DNA replication	7	0.00258955	-2.58678	MCM3, MCM2, MCM6, MCM7, POLE, MCM4, MCM5	273	36	6879	4.89957	0.0665344	0.0631077
KEGG_PATHWAY	hsa04310:Wnt signaling pathway	14	0.00306791	-2.51316	SFRP1, ROCK2, MAPK8, FZD7, RAC2, VANGL2, FZD2, TCF7L1, DVL2, CCND1, WNT7B, NKD2, FZD1, LRP5	273	138	6879	2.5563	0.0665344	0.0631077
KEGG_PATHWAY	hsa04510:Focal adhesion	18	0.00314111	-2.50292	ROCK2, MAPK8, COL1A1, RAC2, LAMB1, PIK3R5, PDGFRB, COL2A1, FN1, LAMA2, CCND1, COL6A1, ITGA9, ITGB5, COL4A1, COL1A2, COL6A3, ERBB2	273	206	6879	2.20175	0.0665344	0.0631077
KEGG_PATHWAY	hsa05217:Basal cell carcinoma	8	0.00503931	-2.29763	WNT7B, FZD7, FZD1, FZD2, TCF7L1, GLI2, SMO, DVL2	273	54	6879	3.73301	0.0944349	0.0895713
KEGG_PATHWAY	hsa04670:Leukocyte transendothelial migration	12	0.00558683	-2.25283	F11R, ROCK2, RAC2, CXCR4, PIK3R5, ITGB2, NCF4, MMP2, PECAM1, ESAM, CYBA, JAM2	273	115	6879	2.62934	0.0944349	0.0895713
KEGG_PATHWAY	hsa04666:Fc gamma R-mediated phagocytosis	10	0.0056742	-2.2461	WASF2, WAS, RAC2, PIK3R5, ARPC1B, HCK, PRKCD, LYN, PIP5K1B, MARCKS	273	84	6879	2.99974	0.0944349	0.0895713
KEGG_PATHWAY	hsa04151:PI3K-Akt signaling pathway	24	0.0093751	-2.02802	F2R, ANGPT1, COL1A1, PKN2, SGK3, LAMB1, PIK3R5, PDGFRB, LPAR6, COL2A1, FN1, LAMA2, CCND1, CSF3R, COL6A1, ITGA9, ITGB5, MYB, COL4A1, COL1A2, IL2RG, COL6A3, IL2RB, GNG13	273	345	6879	1.75289	0.145627	0.138127
KEGG_PATHWAY	hsa05131:Shigellosis	8	0.0126607	-1.89754	ROCK2, MAPK8, PFN1, WASF2, HCLS1, WAS, ARPC1B, NOD1	273	64	6879	3.14973	0.184371	0.174876
KEGG_PATHWAY	hsa05231:Choline metabolism in cancer	10	0.0180358	-1.74386	DGKH, MAPK8, WASF2, WAS, RAC2, HIF1A, PIK3R5, PDGFRB, PIP5K1B, DGKZ	273	101	6879	2.49483	0.247197	0.234466
KEGG_PATHWAY	hsa05166:HTLV-I infection	18	0.0230747	-1.63686	FZD7, SMAD3, FZD2, PIK3R5, SPI1, PDGFRB, DVL2, CCND1, WNT7B, MYB, FZD1, TERT, IL2RG, ITGB2, E2F1, POLE, MAD2L1, IL2RB	273	254	6879	1.78567	0.293593	0.278473
KEGG_PATHWAY	hsa05146:Amoebiasis	10	0.0239411	-1.62086	COL1A1, COL4A1, LAMB1, PIK3R5, COL1A2, CASP3, ITGB2, COL2A1, FN1, LAMA2	273	106	6879	2.37715	0.293593	0.278473
KEGG_PATHWAY	hsa04080:Neuroactive ligand-receptor interaction	19	0.0254638	-1.59408	F2R, HTR5A, HRH2, ADRB1, HTR7, GLRB, LPAR6, SSTR1, S1PR2, NPFFR2, CALCRL, HCRTR2, EDNRA, GABRR1, HTR2A, HTR2C, GRIN2A, AGTR1, CRHR2	273	277	6879	1.72837	0.296653	0.281375
KEGG_PATHWAY	hsa04710:Circadian rhythm	5	0.0324836	-1.48834	PER2, PER3, CRY2, CRY1, NR1D1	273	31	6879	4.06416	0.345387	0.327598
KEGG_PATHWAY	hsa04611:Platelet activation	11	0.0326902	-1.48558	ROCK2, F2R, COL1A1, FERMT3, LCP2, PIK3R5, COL1A2, COL2A1, LYN, GNA13, GUCY1A1	273	130	6879	2.13212	0.345387	0.327598
KEGG_PATHWAY	hsa05210:Colorectal cancer	7	0.0349175	-1.45696	CCND1, MAPK8, RAC2, SMAD3, TCF7L1, PIK3R5, CASP3	273	62	6879	2.84491	0.345387	0.327598
KEGG_PATHWAY	hsa04066:HIF-1 signaling pathway	9	0.0355763	-1.44884	ENO3, ANGPT1, HMOX1, HIF1A, PIK3R5, ERBB2, HK2, IFNGR1, SERPINE1	273	96	6879	2.36229	0.345387	0.327598
KEGG_PATHWAY	hsa05212:Pancreatic cancer	7	0.0425857	-1.37074	CCND1, MAPK8, RAC2, SMAD3, PIK3R5, ERBB2, E2F1	273	65	6879	2.71361	0.395121	0.374772
KEGG_PATHWAY	hsa05132:Salmonella infection	8	0.0451807	-1.34505	ROCK2, MAPK8, PFN1, WASF2, WAS, PKN2, ARPC1B, IFNGR1	273	83	6879	2.4287	0.395121	0.374772
KEGG_PATHWAY	hsa05120:Epithelial cell signaling in Helicobacter pylori infection	7	0.0482428	-1.31657	F11R, MAPK8, CASP3, LYN, NOD1, PTPRZ1, JAM2	273	67	6879	2.63261	0.395121	0.374772
KEGG_PATHWAY	hsa05130:Pathogenic Escherichia coli infection	6	0.0498287	-1.30252	ROCK2, ARHGEF2, HCLS1, WAS, TUBB, ARPC1B	273	51	6879	2.96445	0.395121	0.374772
KEGG_PATHWAY	hsa05222:Small cell lung cancer	8	0.0503057	-1.29838	CCND1, SKP2, COL4A1, LAMB1, PIK3R5, E2F1, FN1, LAMA2	273	85	6879	2.37156	0.395121	0.374772
KEGG_PATHWAY	hsa04020:Calcium signaling pathway	13	0.050874	-1.2935	F2R, HTR5A, HRH2, ADRB1, HTR7, PDGFRB, EDNRA, ERBB2, HTR2A, HTR2C, GRIN2A, AGTR1, PHKG1	273	179	6879	1.83001	0.395121	0.374772
KEGG_PATHWAY	hsa05161:Hepatitis B	11	0.0608398	-1.21581	CCND1, MAPK8, EGR3, IKBKE, PIK3R5, CASP3, DDB2, E2F1, CCNA2, HSPG2, IFIH1	273	145	6879	1.91156	0.457279	0.433729
KEGG_PATHWAY	hsa04360:Axon guidance	10	0.0637507	-1.19552	ROCK2, SEMA3F, EPHA6, RAC2, SLIT1, CXCR4, DPYSL2, EPHB4, NGEF, NTN4	273	127	6879	1.98408	0.464185	0.440278
KEGG_PATHWAY	hsa00561:Glycerolipid metabolism	6	0.0781035	-1.10733	DGKH, GPAM, AGPAT4, DGAT2, LIPG, DGKZ	273	58	6879	2.60667	0.551458	0.523057
KEGG_PATHWAY	hsa05100:Bacterial invasion of epithelial cells	7	0.087337	-1.0588	WASF2, HCLS1, WAS, PIK3R5, ARPC1B, SEPTIN9, FN1	273	78	6879	2.26134	0.598516	0.567691
KEGG_PATHWAY	hsa04024:cAMP signaling pathway	13	0.0925271	-1.03373	ROCK2, F2R, MAPK8, ADRB1, CNGA3, BDNF, RAC2, PIK3R5, SSTR1, EDNRA, ATP1B1, GRIN2A, NPY	273	198	6879	1.6544	0.615966	0.584242
