# Supplementary material for: Brain Regeneration Resembles Brain Cancer at Its Early Wound Healing Stage and Diverges From Cancer Later at Its Proliferation and Differentiation Stages
Source: Front Cell Dev Biol. 2022 Feb 10;10:813314. doi: 10.3389/fcell.2022.813314 (PMC8868567; doi:10.3389/fcell.2022.813314)
Supplement: Supplementary file 4 [file Table6.XLSX]

## Sheet: Top10 GO-BP terms by modules
Supplementary Table 6: Most significantly enriched GO-BP terms based on the transcriptional changes of each significant module and their associated enrichment p-values for Top 10 gene ontology biological process (GO-BP) terms.
Module	Category	Term	Count	PValue	log10(Pvalue)	Genes	List.Total	Pop.Hits	Pop.Total	Fold.Enrichment	Benjamini	FDR
Turquoise (M1)	GOTERM_BP	GO:0000398~mRNA splicing, via spliceosome	40	3.09992e-07	-6.50865	snrpa1, dbr1, si:ch1073-335m2.2, snrpa, smn1, mettl3, phf5a, bcas2, hnrnpm, nova1, ddx39aa, sf3b6, bud31, sf3b5, u2af1, snrpe, prpf31, ddx39b, snrpb, ncbp2, dhx38, rbmx2, rbm15b, lsm5, snrpg, zmat2, nono, txnl4a, snw1, snrpb2, prpf4, dqx1, lsm6, lsm8, nova2, rbm15, lsm7, dhx8, lsm3, snrpf	3302	82	14912	2.20295	0.000774361	0.000773121
Turquoise (M1)	GOTERM_BP	GO:0015031~protein transport	71	5.98528e-06	-5.22292	gosr1, ap1m1, sec61a1l, zgc:194281, gle1, xpo6, timm13, rab4b, mia3, atg3, timm50, ist1, sec22ba, timm8a, unc119.1, timm23a, chmp1b, cplane2, ap2m1b, fam160a2, chmp4bb, si:dkey-181m9.8, timm9, exoc4, nup35, wash1, xpo4, stx18, ap3s2, uevld, bbs7, timm10, ap3d1, chmp7, spire2, chmp2bb, chmp2a, kpna4, ap1g1, kpna6, rab4a, vps26bl, copz2, ap4s1, gdi1, timm10b, ap1s3b, ap1m3, snf8, cep41, vps36, copz…	3302	194	14912	1.65278	0.00747562	0.00746365
Turquoise (M1)	GOTERM_BP	GO:0008033~tRNA processing	27	3.23841e-05	-4.48967	gtpbp3, thg1l, urm1, pop5, rpp30, trmu, elac2, ftsj1, fars2, trmt1, dus1l, pus1, dus3l, adat3, qtrt1, pop7, trnt1, ctu1, zbtb8os, tsen2, cdkal1, trmt13, rpp14, mettl1, tyw5, dus2, tsen34	3302	55	14912	2.21697	0.0266284	0.0265857
Turquoise (M1)	GOTERM_BP	GO:0006810~transport	303	4.26395e-05	-4.37019	slc9a7, sec14l7, ap1m1, asic1c, pitpnm3, kcnd3, sec61a1l, ndufs6, slc5a6a, slc52a3, abca2, trpa1a, acbd3, atg3, acbd5b, cacna1i, aqp3a, ndufb8, kcnj10a, slc6a6a, kctd4, slc1a2b, timm8a, chmp1b, cplane2, slc25a5, cnih4, fabp10b, fyco1b, gabra2a, slc10a7, wash1, ptgdsa, stx18, pafah1b1a, sv2c, slc25a22a, selenok, slc25a19, fyco1a, mtch2, chmp2a, rhcgb, slc35b4, abcc10, slc11a2, rab4a, rhbg, gabrb4,…	3302	1120	14912	1.22175	0.0266284	0.0265857
Turquoise (M1)	GOTERM_BP	GO:0006412~translation	100	6.32871e-05	-4.19868	mrpl13, eif3bb, BX248510.1, slc25a3b, tcea1, eif1axa, mrpl23, mrps17, rsl24d1, mrpl34, eif4bb, nhp2, guf1, mrpl12, rpl29, rps21, mrpl17, slc25a5, faub, mrpl37, mrpl11, slc25a22a, mrpl4, zgc:153247, tufm, mrpl16, rps27.2, slc25a6, slc25a51a, slc25a17, mrps7, eif2b1, slc25a47a, mrps23, aarsd1, slc25a42, mrps18a, lars2, eif2s2, nipbla, rpl38, slc25a18, slc25a29, mrpl32, mrps18b, mrps6, mrpl14, rps28…	3302	314	14912	1.43823	0.0270066	0.0269634
Turquoise (M1)	GOTERM_BP	GO:0051056~reg. of small GTPase med. signal trans.	13	6.48678e-05	-4.18797	ralgapa1, zmp:0000001168, rap1gap2b, rap1gap, sipa1l1, si:dkey-166d12.2, sipa1l2, rap1gap2a, sipa1l3, diaph2, si:ch211-182d3.1, ralgapb, chn2	3302	18	14912	3.26159	0.0270066	0.0269634
Turquoise (M1)	GOTERM_BP	GO:0015986~ATP synthesis coupled proton transport	16	8.98663e-05	-4.0464	atp5pd, atp5mc1, atp5mc3b, atp6v0a1b, atp5f1e, atp5mea, atp5f1c, mt-atp6, atp5po, atp5pf, atp5pb, atp5mc3a, atp6v0a2b, atp5meb, atp5l, atp5f1d	3302	26	14912	2.77911	0.0320694	0.0320181
Turquoise (M1)	GOTERM_BP	GO:0030150~protein import into mitochondrial matrix	11	0.000114544	-3.94103	grpel1, timm23a, TIMM21, timm50, tomm40l, pam16, dnlz, tomm22, tomm20b, timm44, tomm7	3302	14	14912	3.54833	0.0357663	0.0357091
Turquoise (M1)	GOTERM_BP	GO:0032543~mitochondrial translation	15	0.000238335	-3.62281	mrps16, mrps18a, hars, lars2, mrpl23, mrpl16, mrpl47, mrps17, mrps24, mrps7, ptcd3, mrpl57, mrps18c, chchd1, mrpl10	3302	25	14912	2.70963	0.0661511	0.0660451
Turquoise (M1)	GOTERM_BP	GO:0042254~ribosome biogenesis	22	0.00173862	-2.7598	rpf1, eif6, wdr12, noc4l, gnl1, kri1, setd4, rsl24d1, ddx51, riox1, rrs1, nip7, pes, mrto4, nom1, mphosph10, rcl1, mrpl10, nhp2, nop10, riox2, krr1	3302	51	14912	1.9481	0.414565	0.413901
Blue (M2)	GOTERM_BP	GO:0061300~cerebellum vasculature development	5	0.000819002	-3.08671	vegfba, pdgfrb, pdgfra, foxc1b, foxc1a	1087	7	14912	9.79892	0.934316	0.934316
Blue (M2)	GOTERM_BP	GO:0051666~actin cortical patch localization	4	0.00344512	-2.4628	wipf2a, wipf2b, wipf1a, wipf1b	1087	5	14912	10.9748	0.934316	0.934316
Blue (M2)	GOTERM_BP	GO:0000147~actin cortical patch assembly	4	0.00344512	-2.4628	wipf2a, wipf2b, wipf1a, wipf1b	1087	5	14912	10.9748	0.934316	0.934316
Blue (M2)	GOTERM_BP	GO:0030048~actin filament-based movement	4	0.00344512	-2.4628	wipf2a, wipf2b, wipf1a, wipf1b	1087	5	14912	10.9748	0.934316	0.934316
Blue (M2)	GOTERM_BP	GO:0051127~positive regulation of actin nucleation	4	0.00344512	-2.4628	wipf2a, wipf2b, wipf1a, wipf1b	1087	5	14912	10.9748	0.934316	0.934316
Blue (M2)	GOTERM_BP	GO:0006915~apoptotic process	18	0.00780533	-2.10761	jade1, boka, pawr, casp3b, dffa, map1sa, tax1bp1a, tradd, six1a, map3k8, prune2, sav1, pak7, atcaya, tp53, pycard, badb, ppp1r13l	1087	123	14912	2.00758	1	1
Blue (M2)	GOTERM_BP	GO:0050900~leukocyte migration	4	0.0107918	-1.96691	CU861476.1, fpr1, mmp9, CABZ01041494.1	1087	7	14912	7.83914	1	1
Blue (M2)	GOTERM_BP	GO:0042127~regulation of cell proliferation	17	0.0134318	-1.87187	bcl6ab, tec, tfap2d, tnfrsf11a, btk, yrk, jak1, nradd, tgfb1b, sav1, fyna, si:ch211-112c15.8, hck, tnfrsf1a, tgfb2l, ngfrb, tes	1087	120	14912	1.94345	1	1
Blue (M2)	GOTERM_BP	GO:0043547~positive regulation of GTPase activity	11	0.0150266	-1.82314	chn1, arhgap23b, ccl44, elmod1, arhgap21b, abr, ccl38.1, rasa1b, myo9aa, myo9b, rasgef1ba	1087	63	14912	2.39529	1	1
Blue (M2)	GOTERM_BP	GO:0005975~carbohydrate metabolic process	22	0.0162614	-1.78884	naga, glb1l, fuca2, chst2a, manba, fbp1a, zgc:158423, man2b1, zgc:101663, ugdh, hpse, hyal2b, chst2b, galm, slc3a2a, taldo1, si:dkey-199f5.8, gpd1c, mdh1b, amdhd2, gnpda1, fuca1.2	1087	175	14912	1.72461	1	1
Brown (M3)	GOTERM_BP	GO:0006412~translation	85	3.71885e-32	-31.4296	rps18, rpl5a, eef1b2, rps26, eif5a2, rps23, rpl6, rpl27, rps15, rps3a, slc25a20, rpl11, rpl28, rps9, qars, rpl19, rpl21, rps14, eif3ha, rps19, rpl24, eif2s1a, ucp1, rpl18, eif3f, rps16, gars, eif3d, faua, rpl23a, mars, rps13, rps2, rpl36, rpl22l1, rps15a, eif5a, rpl13, eif4eb, rpl23, rps17, rpl34, rps8a, eif2a, rps11, rps5, pelo, rps4x, rrbp1a, slc25a25a, uba52, rpl5b, eif3i, rps7, rps29, eif4e1c…	913	314	14912	4.42134	4.52956e-29	4.49237e-29
Brown (M3)	GOTERM_BP	GO:0002181~cytoplasmic translation	12	2.8893e-08	-7.53921	rpl15, rpl6, rplp2l, rpl36, rpl31, rpl7, rplp0, rplp2, rplp1, rpl22, rpl35a, rpl8	913	23	14912	8.52155	1.41307e-05	1.40147e-05
Brown (M3)	GOTERM_BP	GO:0043009~chordate embryonic development	27	3.48047e-08	-7.45836	stra6, rps8a, rpl5a, rps4x, gne, pitpnaa, rpl6, rps15, rps3a, rplp2l, rpl11, rps7, rpl28, rps29, atxn7, rpl35, rps3, rps14, lin28a, rps19, rpl24, gas7a, insra, prmt8b, rplp0, rps15a, rpl35a	913	126	14912	3.49992	1.41307e-05	1.40147e-05
Brown (M3)	GOTERM_BP	GO:0051726~regulation of cell cycle	17	1.0193e-06	-5.9917	gadd45aa, rps18, rps8a, ccng1, jun, bop1, rpl23a, rpl36, phactr4a, rps15a, rps7, ssrp1a, rpl13, rpl7, rps29, phactr4b, rpl35	913	64	14912	4.33844	0.000310376	0.000307828
Brown (M3)	GOTERM_BP	GO:0045899~pos. reg. of RNA pol II trans. preinitiation comp. assembly	6	4.82358e-06	-5.31663	psmc1a, psmc5, psmc1b, psmc6, psmc4, psmc2	913	6	14912	16.333	0.00117502	0.00116538
Brown (M3)	GOTERM_BP	GO:0051603~proteolysis inv. in cellular prot. cat. process	15	6.02272e-06	-5.22021	psmb5, ctsla, ctss2.1, psmb10, psmb4, si:ch211-122f10.4, psma5, lgmn, cpvl, psma4, psma2, psmb1, si:rp71-45k5.4, psma8, psmb2	913	57	14912	4.29815	0.00122261	0.00121258
Brown (M3)	GOTERM_BP	GO:0042254~ribosome biogenesis	13	4.39585e-05	-4.35696	snu13b, dcaf13, rpl7a, rps18, rpl34, gar1, rplp0, bms1, tsr1, bop1, urb2, ftsj3, sdad1	913	51	14912	4.16331	0.00764878	0.00758598
Brown (M3)	GOTERM_BP	GO:0006364~rRNA processing	14	7.76029e-05	-4.11012	utp15, dcaf13, nat10, gar1, bms1, bop1, ncl, ftsj3, ddx56, rps7, si:dkey-251i10.3, nol6, pop4, fbl	913	62	14912	3.68809	0.011815	0.011718
Brown (M3)	GOTERM_BP	GO:0030163~protein catabolic process	8	0.000119851	-3.92136	psmc1a, psmc5, psmc3, psmc1b, psmc6, ctsd, psmc4, psmc2	913	20	14912	6.53319	0.0162199	0.0160867
Brown (M3)	GOTERM_BP	GO:0000462~mat. of SSU-rRNA from tricistronic rRNA trans.	9	0.000148279	-3.82892	rps24, dcaf13, wdr3, wdr46, rps8a, rps16, bms1, tsr1, rps14	913	27	14912	5.44432	0.0180604	0.0179121
Yellow (M4)	GOTERM_BP	GO:0042773~ATP synthesis coupled electron transport	4	0.000493632	-3.3066	mt-nd5, mt-co2, mt-nd4l, mt-nd4	446	6	14912	22.29	0.36391	0.36391
Yellow (M4)	GOTERM_BP	GO:0016569~covalent chromatin modification	10	0.000878879	-3.05607	h2afy2, meaf6, ing2, bmi1a, msl1a, bmi1b, suz12b, brd9, jmjd6, setd1ba	446	84	14912	3.98035	0.36391	0.36391
Yellow (M4)	GOTERM_BP	GO:0032402~melanosome transport	6	0.00128894	-2.88977	inpp5e, cdc42, bbip1, bbs5, rab11bb, rab11ba	446	28	14912	7.16464	0.36391	0.36391
Yellow (M4)	GOTERM_BP	GO:0007399~nervous system development	13	0.00264701	-2.57724	ap1s1, nrn1a, impact, disc1, smo, dla, dld, cyb5d2, ascl1b, foxn4, mdkb, fezf2, chac1	446	157	14912	2.7685	0.509009	0.509009
Yellow (M4)	GOTERM_BP	GO:0060041~retina development in camera-type eye	9	0.00472195	-2.32588	inpp5e, mpp5a, atp6v1h, cdc42, tfap2a, wrb, atp6v1e1b, rpgrb, smo	446	88	14912	3.41949	0.509009	0.509009
Yellow (M4)	GOTERM_BP	GO:0008299~isoprenoid biosynthetic process	4	0.00474992	-2.32331	mvda, mvk, fdps, hmgcs1	446	12	14912	11.145	0.509009	0.509009
Yellow (M4)	GOTERM_BP	GO:0006995~cellular response to nitrogen starvation	4	0.00474992	-2.32331	map1lc3a, becn1, gabarapl2, gabarapa	446	12	14912	11.145	0.509009	0.509009
Yellow (M4)	GOTERM_BP	GO:0007420~brain development	13	0.00480764	-2.31807	ap1m2, cdipt, disc1, kctd13, dpysl2b, h2afy2, mpp5a, bdnf, ascl1b, mdkb, gabarapa, birc6-as2, lama1	446	169	14912	2.57192	0.509009	0.509009
Yellow (M4)	GOTERM_BP	GO:0005975~carbohydrate metabolic process	13	0.00632194	-2.19915	zgc:171967, chst7, pygb, pgm5, hhipl2, mlec, slc3a2b, hhipl1, gfpt1, chst10, chid1, b3gat2, man2a1	446	175	14912	2.48374	0.594965	0.594965
Yellow (M4)	GOTERM_BP	GO:0008380~RNA splicing	7	0.0110537	-1.95649	zcrb1, srsf1b, zmat5, syf2, jmjd6, si:ch211-212k18.4, cwc22	446	63	14912	3.715	0.852125	0.852125
Green (M5)	GOTERM_BP	GO:0051607~defense response to virus	12	1.32002e-12	-11.8794	mxf, ifit9, ifit14, ifit15, mxa, tlr3, ifit10, mxe, rsad2, mxc, ifit8, mxb	191	39	14912	24.0226	5.21406e-10	5.17446e-10
Green (M5)	GOTERM_BP	GO:0009615~response to virus	7	2.84763e-08	-7.54552	mxa, tlr3, pkz, mxe, rsad2, mxc, mxb	191	16	14912	34.1571	5.62407e-06	5.58136e-06
Green (M5)	GOTERM_BP	GO:0048285~organelle fission	5	8.67459e-07	-6.06175	mxf, mxa, mxe, mxc, mxb	191	7	14912	55.7666	0.000114215	0.000113348
Green (M5)	GOTERM_BP	GO:0006954~inflammatory response	11	1.29682e-05	-4.88712	cxcl11.6, BX323596.1, BX323596.2, ccl19a.1, cxcl11.7, cxcl11.5, fas, tlr3, cxcl11.1, cd40, cxcl20	191	141	14912	6.09082	0.00128061	0.00127088
Green (M5)	GOTERM_BP	GO:0002690~positive regulation of leukocyte chemotaxis	4	6.86304e-05	-4.16348	cxcl11.6, cxcl11.7, cxcl11.5, cxcl20	191	7	14912	44.6133	0.0054218	0.00538062
Green (M5)	GOTERM_BP	GO:0042127~regulation of cell proliferation	9	0.000149225	-3.82616	cxcl11.6, dusp22b, cxcl11.7, blk, cxcl11.5, fas, jag2b, cd40, cxcl20	191	120	14912	5.8555	0.00937075	0.00929958
Green (M5)	GOTERM_BP	GO:0045087~innate immune response	10	0.000166064	-3.77972	mxf, blk, hist1h2a4, mxa, tlr3, pkz, mxe, rsad2, mxc, mxb	191	155	14912	5.03699	0.00937075	0.00929958
Green (M5)	GOTERM_BP	GO:0006935~chemotaxis	6	0.000385559	-3.41391	cxcl11.6, ccl19a.1, cxcl11.7, cxcl11.5, ackr4b, cxcl11.1	191	49	14912	9.56	0.0186097	0.0184684
Green (M5)	GOTERM_BP	GO:0032496~response to lipopolysaccharide	6	0.000424018	-3.37262	cxcl11.6, cxcl11.7, cxcl11.5, fas, cd40, cxcl20	191	50	14912	9.3688	0.0186097	0.0184684
Green (M5)	GOTERM_BP	GO:0070098~chemokine-mediated signaling pathway	5	0.000694544	-3.1583	cxcl11.6, ccl19a.1, cxcl11.7, cxcl11.5, cxcl20	191	32	14912	12.199	0.0274345	0.0272261
Black (M7)	GOTERM_BP	GO:0007067~mitotic nuclear division	11	2.7559e-07	-6.55974	aurka, ndc80, zwilch, ncaph, ska1, wee1, mis12, cdca8, ncapd2, nek8, ska3	219	81	14912	9.24697	0.000102039	0.00010037
Black (M7)	GOTERM_BP	GO:0051301~cell division	12	4.17339e-07	-6.37951	ndc80, ccne1, zwilch, ncaph, ska1, cdc6, cdca8, ncapd2, rgs14a, nek8, cdc20, ska3	219	106	14912	7.70845	0.000102039	0.00010037
Black (M7)	GOTERM_BP	GO:0007049~cell cycle	14	7.45343e-07	-6.12764	ndc80, ccne1, mis12, cdca8, ncapd2, nek8, ska3, aurka, zwilch, ncaph, ska1, cdc20, chaf1a, ccnd2b	219	162	14912	5.88444	0.000121491	0.000119503
Black (M7)	GOTERM_BP	GO:0006270~DNA replication initiation	6	1.07232e-05	-4.96968	mcm5, mcm6, gins4, cdc6, mcm3, pola2	219	21	14912	19.4547	0.00131091	0.00128946
Black (M7)	GOTERM_BP	GO:0000070~mitotic sister chromatid segregation	5	2.00621e-05	-4.69762	nsl1, ncaph, mis12, cdca8, ncapd2	219	12	14912	28.3714	0.00196207	0.00192997
Black (M7)	GOTERM_BP	GO:0006260~DNA replication	9	3.0823e-05	-4.51113	mcm5, pold1, mcm6, pcna, prim1, gins4, mcm3, chaf1a, pola2	219	84	14912	7.2955	0.00251207	0.00247098
Black (M7)	GOTERM_BP	GO:0006955~immune response	14	0.000384904	-3.41465	lcp2a, si:ch73-158p21.3, fybb, traf6, si:dkey-23c22.5, si:rp71-36a1.5, enpp1, zgc:153759, tnfsf10, ctss2.2, tlr1, zgc:153631, tnfsf12, zgc:123107	219	293	14912	3.25351	0.0268883	0.0264484
Black (M7)	GOTERM_BP	GO:0007052~mitotic spindle organization	4	0.000615012	-3.21112	aurka, ndc80, stil, cenph	219	12	14912	22.6971	0.0375926	0.0369776
Black (M7)	GOTERM_BP	GO:0090024~negative regulation of neutrophil chemotaxis	3	0.00125199	-2.9024	cxcr4b, inppl1a, inpp5d	219	4	14912	51.0685	0.0680247	0.0669118
Black (M7)	GOTERM_BP	GO:0007059~chromosome segregation	5	0.00146088	-2.83539	ndc80, ska1, nek2, cenph, ska3	219	34	14912	10.0134	0.0714371	0.0702683
Pink (M8)	GOTERM_BP	GO:0051673~membrane disruption in other organism	7	1.82734e-07	-6.73818	hist1h2a11, hist1h2a11, hist1h2a11, hist1h2a4, hist1h2a4, hist1h2a11, hist1h2a4	151	26	14912	26.5879	6.68806e-05	6.63324e-05
Pink (M8)	GOTERM_BP	GO:0050830~defense response to Gram-positive bacterium	7	9.98942e-07	-6.00046	hist1h2a11, hist1h2a11, hist1h2a11, hist1h2a4, hist1h2a4, hist1h2a11, hist1h2a4	151	34	14912	20.3319	0.000182806	0.000181308
Pink (M8)	GOTERM_BP	GO:0006342~chromatin silencing	7	1.68437e-06	-5.77356	hist1h2a11, hist1h2a11, hist1h2a4, hist1h2a10, CU457819.1, hist1h2a4, hist1h2a4	151	37	14912	18.6834	0.000205493	0.000203808
Pink (M8)	GOTERM_BP	GO:0006334~nucleosome assembly	9	5.04574e-06	-5.29707	FP340257.1, zgc:153405, CU459186.3, si:ch1073-159d7.7, si:dkey-108k21.10, si:ch73-368j24.12, si:ch211-113a14.24, HIST1H4D, hist2h3c, si:dkey-261m9.12, zgc:173552	151	95	14912	9.35573	0.000461685	0.000457901
Pink (M8)	GOTERM_BP	GO:0007219~Notch signaling pathway	5	0.00146626	-2.83379	jag1b, maml1, notch1a, dlb, dab2	151	49	14912	10.077	0.10733	0.10645
Pink (M8)	GOTERM_BP	GO:0045087~innate immune response	7	0.00479864	-2.31888	hist1h2a11, hist1h2a11, hist1h2a11, hist1h2a4, hist1h2a4, hist1h2a11, hist1h2a4	151	155	14912	4.4599	0.292717	0.290318
Pink (M8)	GOTERM_BP	GO:0016055~Wnt signaling pathway	6	0.00918173	-2.03708	tcf7l1a, trabd2a, csnk1g2b, dvl3a, tcf7l1b, wls	151	127	14912	4.66559	0.443106	0.439474
Pink (M8)	GOTERM_BP	GO:0048699~generation of neurons	3	0.00968538	-2.01388	tcf7l1a, notch1a, tcf7l1b	151	15	14912	19.751	0.443106	0.439474
Pink (M8)	GOTERM_BP	GO:0060847~endothelial cell fate specification	2	0.0200175	-1.69859	tcf7l1a, tcf7l1b	151	2	14912	98.755	0.666037	0.660578
Pink (M8)	GOTERM_BP	GO:0010456~cell proliferation in dorsal spinal cord	2	0.0200175	-1.69859	tcf7l1a, tcf7l1b	151	2	14912	98.755	0.666037	0.660578
Magenta (M9)	GOTERM_BP	GO:0006334~nucleosome assembly	12	2.00383e-08	-7.69814	si:ch1073-153i20.4, CR354435.1, zgc:173585, si:ch73-368j24.11, si:ch211-113a14.12, si:ch211-113a14.11, si:dkey-23a13.17, zgc:163061, si:ch211-113a14.18, si:dkey-23a13.9, zgc:173552, si:dkey-108k21.21	182	95	14912	10.3496	7.59451e-06	7.55443e-06
Magenta (M9)	GOTERM_BP	GO:0007018~microtubule-based movement	8	4.79799e-05	-4.31894	kif20a, kif22, dnah6, kif20bb, kif2c, cenpe, kifc1, dync1i1	182	79	14912	8.29712	0.00909219	0.00904421
Magenta (M9)	GOTERM_BP	GO:0006260~DNA replication	7	0.00054645	-3.26245	dtl, pold3, rfc1, pole, poln, pif1, pola1	182	84	14912	6.82784	0.0593429	0.0590297
Magenta (M9)	GOTERM_BP	GO:0001654~eye development	6	0.00062631	-3.20321	rab18a, vangl2, lamc1, nfkb1, lamb1a, gpc4	182	57	14912	8.62464	0.0593429	0.0590297
Magenta (M9)	GOTERM_BP	GO:0051673~membrane disruption in other organism	4	0.00372362	-2.42903	si:ch211-113a14.11, hist1h2a3, hist1h2a11, hist1h2a4	182	26	14912	12.6052	0.282251	0.280761
Magenta (M9)	GOTERM_BP	GO:0050830~defense response to Gram-positive bacterium	4	0.00798371	-2.0978	si:ch211-113a14.11, hist1h2a3, hist1h2a11, hist1h2a4	182	34	14912	9.6393	0.504304	0.501643
Magenta (M9)	GOTERM_BP	GO:0006974~cellular response to DNA damage stimulus	6	0.0113607	-1.94459	dtl, flj11011l, wdr76, mastl, pif1, tonsl	182	111	14912	4.42887	0.615101	0.611855
Magenta (M9)	GOTERM_BP	GO:0030903~notochord development	4	0.0152095	-1.81789	vangl2, lamc1, lamb1a, gpc4	182	43	14912	7.62177	0.691028	0.687381
Magenta (M9)	GOTERM_BP	GO:0006281~DNA repair	7	0.0167123	-1.77696	flj11011l, rfc1, rad52, pole, poln, pif1, tonsl	182	168	14912	3.41392	0.691028	0.687381
Magenta (M9)	GOTERM_BP	GO:0006935~chemotaxis	4	0.021542	-1.66671	si:ch211-207g17.3, fes, cxcr3.1, xcr1a.1	182	49	14912	6.6885	0.691028	0.687381
Purple (M10)	GOTERM_BP	GO:0007049~cell cycle	12	9.5655e-08	-7.01929	uhrf1, esco2, cdk1, mybl2b, e2f8, aurkb, spc24, fbxo5, cdc45, ttk, zgc:63587, ercc6l	124	162	14912	8.908	2.91748e-05	2.86965e-05
Purple (M10)	GOTERM_BP	GO:0007059~chromosome segregation	5	0.000168792	-3.77265	top2a, kif11, aurkb, knstrn, cenpn	124	34	14912	17.685	0.0246687	0.0242643
Purple (M10)	GOTERM_BP	GO:0051301~cell division	7	0.000242643	-3.61503	cdk1, spc24, fbxo5, cdc45, ttk, zgc:63587, ercc6l	124	106	14912	7.94157	0.0246687	0.0242643
Purple (M10)	GOTERM_BP	GO:0007018~microtubule-based movement	6	0.000487177	-3.31231	kif14, kif11, kif4, kif15, kif20ba, kif23	124	79	14912	9.13352	0.0371473	0.0365383
Purple (M10)	GOTERM_BP	GO:0006270~DNA replication initiation	4	0.000653419	-3.18481	cdc7, cdc45, mcm2, mcm4	124	21	14912	22.9063	0.0398586	0.0392051
Purple (M10)	GOTERM_BP	GO:0051276~chromosome organization	3	0.00290823	-2.53637	smc2, smc4, fbxo5	124	10	14912	36.0774	0.139685	0.137396
Purple (M10)	GOTERM_BP	GO:0000278~mitotic cell cycle	4	0.0032059	-2.49405	esco2, fbxo5, chaf1b, plk1	124	36	14912	13.362	0.139685	0.137396
Purple (M10)	GOTERM_BP	GO:0007067~mitotic nuclear division	5	0.00449717	-2.34706	aurkb, spc24, cenpn, fbxo5, ercc6l	124	81	14912	7.42334	0.1561	0.153541
Purple (M10)	GOTERM_BP	GO:0000281~mitotic cytokinesis	3	0.00496001	-2.30452	aurkb, fbxo5, kif23	124	13	14912	27.7519	0.1561	0.153541
Purple (M10)	GOTERM_BP	GO:0006260~DNA replication	5	0.00511802	-2.2909	rrm1, recql4, rrm2, mcm2, mcm4	124	84	14912	7.15822	0.1561	0.153541
