# Supplementary material for: Brain Regeneration Resembles Brain Cancer at Its Early Wound Healing Stage and Diverges From Cancer Later at Its Proliferation and Differentiation Stages
Source: Front Cell Dev Biol. 2022 Feb 10;10:813314. doi: 10.3389/fcell.2022.813314 (PMC8868567; doi:10.3389/fcell.2022.813314)
Supplement: Supplementary file 5 [file Table4.XLSX]

## Sheet: KEGG_1dpl
Supplementary Table 4: KEGG pathways enriched at three different stages of zebrafish brain regeneration by using all DEGs.
Category	Term	Count	PValue	log10(Pvalue)	Genes	List.Total	Pop.Hits	Pop.Total	Fold.Enrichment	Benjamini	FDR
KEGG_PATHWAY	dre03010:Ribosome	111	1.68147e-35	-34.7743	mrpl13, rps18, mrpl23, mrps17, rps25, rpl27, rplp2l, mrpl34, si:dkey-17e16.10, rpl28, rplp2, rpl21, mrpl12, rps14, rpl29, rpl24, rps21, rpl18, mrpl17, rps13, rps2, rpl22l1, mrpl11, rpl7, mrpl4, rpl23, rpl34, rps8a, mrpl16, rps11, rplp1, rps27.2, mrpl18, mrps7, rpl5b, rps7, rpl30, rps29, rpl35, rpl32, rps3, mrps18a, rplp0, rpl38, mrpl32, mrps6, mrpl14, rps28, rpl22, rpl39, mrpl30, rps10, mrps2, rp…	1663	134	5405	2.69229	2.57265e-33	2.47176e-33
KEGG_PATHWAY	dre03050:Proteasome	40	8.66948e-10	-9.06201	psmc1a, psmb5, psme1, psmb3, psmd6, psmb6, psma3, psmd11b, psmd8, psma6l, psmd13, psma4, psme3, psmd14, psma2, psmc6, psmd7, si:rp71-45k5.4, psmb2, psma1, psma6b, psmd11a, psmd4b, psmc1b, psmb10, psma6a, psmb4, psmd12, psmc2, psma5, psmb7, psmc5, psmc3, pomp, psmb1, psme2, psmd3, psma8, psmc4, psmd4a	1663	55	5405	2.36375	6.63215e-08	6.37207e-08
KEGG_PATHWAY	dre00190:Oxidative phosphorylation	77	3.97118e-09	-8.40108	cox8a, mt-nd4, ndufs6, mt-atp6, atp6ap1b, mt-co3, mt-nd3, atp5pf, ndufa12, mt-nd5, ppa1b, ndufab1b, cox5aa, sdhc, atp5l, atp5f1d, ndufb8, NDUFC1, ndufb2, ndufb10, ndufb4, atp6v0a1b, cyc1, atp5po, cox5ab, mt-cyb, ndufa11, ndufab1a, mt-nd2, ndufa3, atp6v0a2b, cox6b2, cox4i1, mt-nd1, atp6v0ca, atp5meb, cox7a3, COX5B, atp5mf, ndufb3, atp6v0e1, tcirg1b, cox7a2a, ndufa4l, cox6b1, atp5mc1, ndufs4, atp6v…	1663	140	5405	1.78758	2.0253e-07	1.94588e-07
KEGG_PATHWAY	dre04141:Protein processing in endoplasmic reticulum	75	0.00209829	-2.67813	sec61a1l, ube2g2, herpud1, calr3b, mogs, hspbp1, dnajb11, mapk8b, ssr2, sec31b, hsp90b1, ssr4, ube2d2l, mapk10, lman1, ddost, sec61g, eif2s1b, zgc:175088, hspa4l, sec61b, ubxn6, rbx1, erlec1, dnajb12a, dnajb1a, ube2g1a, dnajc1, bcl2b, ssr3, calr3a, capn2a, hyou1, edem1, tram1, p4hb, nsfl1c, mapk8a, pdia3, pdia4, ube2d1a, sec61a1, capn2b, rrbp1b, rrbp1a, dnajc5gb, ube2g1b, derl2, rpn1, hspa5, dnaj…	1663	181	5405	1.34675	0.0802597	0.0771123
KEGG_PATHWAY	dre03030:DNA replication	21	0.00391243	-2.40755	prim2, pold1, rnaseh2a, ssbp1, pcna, si:dkey-28b4.7, mcm3, rpa3, pola2, mcm5, rfc4, rpa2, mcm6, rfc2, pole3, fen1, mcm2, mcm4, zgc:110269, lig1, rfc3	1663	38	5405	1.79614	0.11972	0.115025
KEGG_PATHWAY	dre03008:Ribosome biogenesis in eukaryotes	35	0.0052329	-2.28126	utp15, rpp25l, eif6, gnl3l, imp4, rpp30, xrn2, zgc:86811, riok1, si:dkey-251i10.3, ran, fcf1, nhp2, nop58, rpp40, utp6, emg1, snu13b, gnl3, nat10, gar1, rrp7a, dkc1, nxt2, bms1, riok2, wdr75, nmd3, wdr3, utp4, rcl1, pop4, nop10, nop56, fbl	1663	75	5405	1.51674	0.133439	0.128206
KEGG_PATHWAY	dre04010:MAPK signaling pathway	118	0.00736142	-2.13304	cacna1ab, cacnb1, gng12a, braf, rac3b, fgf6a, mapta, nf1b, fgf1a, mapk8b, nlk2, cacna1i, mapk10, pak2a, rac1a, taok3b, mapkapk2a, map4k3b, map3k14a, ppp3cca, map3k2, cdc42l, map3k8, rasgrp4, fosab, ppp3ccb, map3k12, gadd45ab, rasgrp3, gna12a, jun, ikbkb, si:zfos-2326c3.2, zgc:55558, prkcba, nras, pdgfrb, MAP3K13, RASGRP2, taok3a, tgfbr2b, map2k4a, cacnb3a, arrb1, map2k7, cacna2d2b, ppm1ba, nr4a1,…	1663	315	5405	1.21752	0.1609	0.15459
KEGG_PATHWAY	dre04150:mTOR signaling pathway	33	0.00944526	-2.02479	cab39, ptenb, rictorb, braf, ikbkb, mtor, irs1, prkcba, eif4ebp1, eif4bb, eif4e1c, ddit4, pik3cd, akt3a, rps6ka3a, pik3ca, rragcb, PRKCA, rps6ka2, mapk1, akt1s1, cab39l1, pik3cb, ulk1b, rhebl1, pik3r2, rragca, pik3cg, akt3b, pik3r5, rptor, akt2l, rps6	1663	72	5405	1.48965	0.180641	0.173557
KEGG_PATHWAY	dre05132:Salmonella infection	41	0.0145082	-1.83839	arpc5b, tlr5b, jun, wasf1, arpc4, rhogb, mapk13, pfn2, arpc1a, wasa, arpc3, rock2a, klc1a, actb2, caspa, mapk8b, mapk10, arpc1b, wasb, rac1a, cxcl8a, flna, klc3, mapk1, rhogc, rhogd, wasf2, arpc5a, rilp, cdc42l, si:ch211-153j24.3, fosaa, fosab, arpc4l, pycard, flnca, arpc2, flncb, actb1, myd88, mapk8a	1663	96	5405	1.38809	0.24664	0.236968
KEGG_PATHWAY	dre04210:Apoptosis	33	0.0186491	-1.72934	fadd, cycsb, ikbkb, capn2b, tnfsf10, tp53, pik3cd, akt3a, pik3ca, zgc:153993, cflara, csf2rb, fas, map3k14a, bcl2l1, pik3cb, apaf1, baxa, pik3r2, pik3cg, tradd, casp7, hdr, nfkbiaa, akt3b, bcl2b, casp8, capn2a, endog, pik3r5, akt2l, tnfrsf1a, capn1a	1663	75	5405	1.43007	0.285331	0.274142
KEGG_PATHWAY	dre03013:RNA transport	61	0.0259643	-1.58562	rpp25l, EIF1B, eif4g1a, eif4ebp3l, rpp30, lyn, eif3ea, eif4bb, eif4a1a, gemin7, clns1a, eif3ha, eif2s1b, eif3f, alyref, eif5, eif3d, nup35, cyfip2, eif2b4, magoh, nup210, sap18, eef1a1l2, pop4, eif2s3, eif5b, prmt5, cyfip1, gemin8, eef1a1l1, eif3jb, ube2ib, nup62l, eif4ebp1, eif4a2, eif3i, ran, eif4e1c, aaas, rpp40, ncbp2, rbm8a, nup37, eif2s2, thoc7, nxt2, nup43, thoc5, snupn, nmd3, eif3ba, pabp…	1663	157	5405	1.2628	0.361139	0.346977
KEGG_PATHWAY	dre04623:Cytosolic DNA-sensing pathway	19	0.0304402	-1.51655	irf7, irf3, ikbkb, polr1d, tmem173, ripk3, polr3d, nfkbiaa, polr1c, caspa, polr3f, polr2l, pycard, polr2eb, polr2f, polr2k, polr2h, ikbke, polr3k	1663	39	5405	1.58341	0.388113	0.372893
KEGG_PATHWAY	dre03020:RNA polymerase	15	0.0355553	-1.4491	polr1d, polr1e, twistnb, polr2c, polr3d, polr2i, polr1c, polr3f, polr2d, polr2l, polr2eb, polr2f, polr2k, polr2h, polr3k	1663	29	5405	1.68111	0.418459	0.402049
KEGG_PATHWAY	dre03060:Protein export	12	0.0456552	-1.34051	spcs1, spcs3, sec11a, immp2l, srp9, srprb, hspa5, sec61b, sec61a1l, srp19, sec61a1, sec61g	1663	22	5405	1.77281	0.498946	0.479379
KEGG_PATHWAY	dre04115:p53 signaling pathway	30	0.0533404	-1.27294	siah2l, cdk2, chek2, ccne1, gadd45ab, sesn2, ptenb, cycsb, gtse1, ccng2, si:dkey-42i9.6, tp53, cdk6, cd82b, zmat3, ccnd2a, zgc:153993, cd82a, gadd45aa, ccng1, cdk4, fas, serpine1, igfbp3, apaf1, baxa, casp8, perp, ddb2, gadd45ga	1663	72	5405	1.35423	0.544072	0.522736
KEGG_PATHWAY	dre04144:Endocytosis	106	0.0864574	-1.0632	sh3glb1a, grk5l, iqsec3b, grk7b, acap1, asap2b, unm_sa1614, cyth1a, arpc1a, ehd1b, rab8a, rab22a, arpc1b, washc3, chmp1b, chmp4bb, snx5, pip5k1ca, agap1, wash1, cdc42l, vps25, bin1b, asap1b, arf6b, zgc:109949, mvb12ba, wipf1b, snx1b, tgfbr2b, arf6a, asap1a, itcha, wasb, rab11fip5a, ehd3, kif5c, arrb1, snx3, arpc5a, acap3b, igf2r, sh3gl1a, arfgef1, cxcr4a, eps15l1a, kif5ab, igf1ra, rbsn, rab5ab, s…	1663	305	5405	1.12956	0.826749	0.794328
KEGG_PATHWAY	dre00230:Purine metabolism	68	0.0990589	-1.00411	adssl1, nudt9, CABZ01079080.1, zgc:86811, adprm, polr3d, polr2c, polr2i, polr3f, nme3, gart, polr2d, pde4a, polr2f, polr2k, adcy1a, PDE3B, ampd3b, itpa, pde4ba, polr3k, si:ch211-132f19.7, polr1e, si:dkey-28b4.7, pde10a, dguok, enpp4, enpp1, pde11a, polr1c, nt5c1aa, pde5ab, polr2l, polr2eb, atic, adss, gucy1b1, prim2, pold1, ada, pgm2, polr1d, impdh2, gda, twistnb, rrm1, nt5c2b, ada2b, adssl, nudt…	1663	190	5405	1.16321	0.850833	0.817467

## Sheet: KEGG_3dpl
Category	Term	Count	PValue	log10(Pvalue)	Genes	List.Total	Pop.Hits	Pop.Total	Fold.Enrichment	Benjamini	FDR
KEGG_PATHWAY	dre03010:Ribosome	79	1.35124e-21	-20.8693	rps18, rpl5a, rps26, rps25, rps23, rpl6, rpl27, rps15, rps3a, rplp2l, rpl11, rpl28, rplp2, rps9, rpl19, rpl21, rps14, rpl29, rps19, rpl24, rps21, rpl18, rps16, faua, rpl23a, rps13, rps2, rpl36, mrpl2, rpl22l1, rps15a, rpl13, rpl7, rpl36a, rps6, rpl3, rpl23, rps17, rpl34, rps8a, rps11, rps5, rps4x, rplp1, rpsa, uba52, rpl5b, rps7, rps29, rpl30, rpl35, rpl32, rpl10, rps3, rps27a, rps27.1, rps26l, r…	1134	134	5405	2.80999	2.05389e-19	1.90525e-19
KEGG_PATHWAY	dre04060:Cytokine-cytokine receptor interaction	56	2.41326e-07	-6.6174	il7r, tnfrsf11a, il21, tnfsf10, il2rga, tnfrsf9a, tgfb3, il6r, il13ra1, cxcl8a, csf1rb, fas, cxcr4b, tnfb, csf3r, tnfsf13b, cxcr3.2, BX537113.1, tnfrsf1a, ngfrb, cxcl11.1, ifng1, il2rb, il6st, cxcr3.1, tnfrsf19, acvr2aa, nradd, epor, osmr, il6, crfb4, il11a, faslg, il21r.1, si:dkey-13m1.2, tgfb2, cd27, tnfrsf1b, csf2rb, relt, il12rb2, ngfra, clcf1, ccr9a, zgc:153759, tgfb1a, il17ra1a, csf1ra, tgf…	1134	138	5405	1.93416	1.83408e-05	1.70135e-05
KEGG_PATHWAY	dre04110:Cell cycle	55	6.24935e-07	-6.20416	cdk2, cdc7, cdkn1a, ccne1, pttg1, orc4, ccnb2, rbl1, cdc25b, orc1, mcm6, e2f1, tgfb3, mcm4, bub1bb, ccnb1, gadd45aa, espl1, e2f3, skp2, cdc6, pcna, E2F2, ccna2, mcm3, smad3a, orc5, mycb, ccnd1, cdkn2c, ccne2, ttk, cdc20, dbf4, chek2, orc3, bub1, orc6, plk1, mcm5, cdk1, rb1, wee1, tp53, tgfb2, mcm2, mad2l1, cdk4, cdc45, anapc10, gadd45bb, tgfb1a, tgfb1b, chek1, e2f5	1134	138	5405	1.89962	3.16634e-05	2.9372e-05
KEGG_PATHWAY	dre03030:DNA replication	22	3.38509e-06	-5.47043	prim2, dna2, pold1, rnaseh2a, pcna, mcm3, pold2, rpa3, pola1, pola2, mcm5, pole2, rfc4, rpa2, mcm6, rfc2, pole, prim1, fen1, mcm2, mcm4, lig1	1134	38	5405	2.75944	0.000128633	0.000119324
KEGG_PATHWAY	dre04115:p53 signaling pathway	32	1.72563e-05	-4.76305	cdk2, casp8l2, cdkn1a, chek2, ccne1, sesn2, gtse1, ccnb2, rrm2, cdk1, si:dkey-42i9.6, tp53, casp3a, cd82b, ccnb1, cd82a, gadd45aa, bida, ccng1, cdk4, fas, casp3b, rrm2, apaf1, baxa, gadd45bb, pmaip1, ccnd1, casp8, chek1, ccne2, perp	1134	72	5405	2.11836	0.00052459	0.000486626
KEGG_PATHWAY	dre04210:Apoptosis	32	4.5507e-05	-4.34192	casp8l2, fadd, CAPN1, akt1, zgc:55262, tnfsf10, tp53, faslg, casp3a, badb, cflara, csf2rb, bida, tnfrsfa, fas, casp3b, map3k14a, pik3cb, ripk1l, apaf1, pik3cg, tradd, baxa, casp7, bcl2a, nfkbiaa, casp8, capn2a, pik3r5, akt2l, tnfrsf1a, traf2b	1134	75	5405	2.03363	0.00115284	0.00106941
KEGG_PATHWAY	dre04620:Toll-like receptor signaling pathway	38	0.000115994	-3.93556	casp8l2, fadd, ticam1, akt1, tlr5b, traf6, jun, irf3, stat1a, irak1, irak4, il6, rac1b, ikbke, rac1a, cxcl8a, irf5, irf7, tlr3, stat1b, tlr5a, pik3cb, ripk1l, pik3cg, si:ch211-153j24.3, map3k8, nfkbiaa, tlr1, fosaa, fosab, casp8, pik3r5, ctsk, akt2l, myd88, cd40, cxcl11.1, mapk8a	1134	99	5405	1.82949	0.00251874	0.00233646
KEGG_PATHWAY	dre04512:ECM-receptor interaction	30	0.00137322	-2.86226	col1a1b, col4a2, itgb1a, col4a5, lamb4, lamc3, itga2.2, lamb1a, col5a1, lamb2, itgb3b, sdc4, cd44b, lama1, col4a1, hspg2, col2a1a, hmmr, itgb6, lama4, vwf, sv2bb, itgb4, itgav, sv2, itga5, lamc1, itga3b, col1a1a, itgb5	1134	81	5405	1.7653	0.0249384	0.0231337
KEGG_PATHWAY	dre05132:Salmonella infection	34	0.00147662	-2.83073	ifng1, arpc5b, tlr5b, jun, pkn3, arpc4, rhogb, wasa, actb2, caspa, il6, rac1b, arpc1b, wasb, pkn2, rac1a, cxcl8a, rock2b, flna, PKN2 (1 of many), rhogd, wasf2, arpc5a, tlr5a, cdc42l, si:ch211-153j24.3, fosaa, fosab, pycard, flnca, pkn1a, actb1, myd88, mapk8a	1134	96	5405	1.68807	0.0249384	0.0231337
KEGG_PATHWAY	dre04145:Phagosome	48	0.00299129	-2.52414	tcirg1b, ctsla, tubb4b, tap1, ctss2.1, tuba8l3, mhc2dab, itgb1a, atp6ap1b, calr3b, sec61a1, ncf4, c3a.1, itga2.2, colec11, mrc1b, tuba8l4, tubb5, stx7l, actb2, rac1b, itgb2, mhc2b, itgb3b, tcirg1a, ncf1, rac1a, sec61g, cyba, coro1a, tuba1b, sec61b, pla2r1, tuba8l, marco, itgav, vamp3, zgc:55461, canx, si:busm1-194e12.11, atpv0e2, ctss2.2, itga5, calr3a, actb1, atp6v0e1, si:busm1-266f07.2, itgb5	1134	154	5405	1.4856	0.0454676	0.0421771
KEGG_PATHWAY	dre04630:Jak-STAT signaling pathway	36	0.00470234	-2.32769	il2rb, ifng1, il6st, socs3b, stat4, akt1, il7r, stat1a, stat3, il21, irf9, epor, il2rga, osmr, il6, crfb4, il11a, il21r.1, si:dkey-13m1.2, stat6, il6r, il13ra1, csf2rb, il12rb2, stat1b, jak1, pik3cb, socs1a, pik3cg, csf3r, mycb, ccnd1, pik3r5, ptpn6, pim1, akt2l	1134	110	5405	1.55988	0.0649778	0.0602755
KEGG_PATHWAY	dre04510:Focal adhesion	69	0.00785947	-2.10461	col1a1b, col4a2, pdgfra, pak4, mylk4b, itgb1a, col4a5, pxnb, parvaa, lamb4, lamc3, rap1b, vaspb, actb2, myl9a, lamb1a, erbb2, lamb2, pak2a, rac1a, col4a1, pgfb, itgav, pik3cg, cdc42l, itga5, ccnd1, capn2a, pik3r5, itga3b, flnca, akt2l, pak6b, actb1, rhocb, mapk8a, itgb5, akt1, ilk, vaspa, jun, tln1, pdgfrb, itga2.2, rac1b, col5a1, kdr, badb, itgb3b, met, lama1, rock2b, flna, col2a1a, zyx, itgb6, …	1134	248	5405	1.32611	0.0995532	0.0923487
KEGG_PATHWAY	dre05168:Herpes simplex infection	52	0.0104015	-1.9829	cdk2, fadd, socs3b, ticam1, mhc2dab, eef1da, c3a.1, irf9, ifih1, mhc2b, casp3a, ikbke, skp2, fas, tlr3, casp3b, cfp, cdc34a, tnfb, si:ch211-153j24.3, fosab, tnfrsf1a, myd88, traf2b, mapk8a, ifng1, traf1, casp8l2, tap1, traf6, per1a, jun, irf3, stat1a, cfp, cdk1, il6, tp53, faslg, nop53, irf7, pkz, stat1b, jak1, cd74a, zgc:153759, si:busm1-194e12.11, nfkbiaa, eef1db, fosaa, casp8, si:busm1-266f07.2	1134	180	5405	1.37694	0.121618	0.112817
KEGG_PATHWAY	dre03050:Proteasome	20	0.0133395	-1.87486	psmb5, ifng1, psmd4b, psmf1, psmb10, psme1, psma6a, psmb3, psma5, psmb9a, psma6l, psmb8a, psma4, psma2, psmb1, psme2, si:rp71-45k5.4, psma8, psma1, psmb2	1134	55	5405	1.73321	0.144829	0.134348
KEGG_PATHWAY	dre00670:One carbon pool by folate	9	0.0212442	-1.67276	aldh1l1, tyms, dhfr, mthfd1l, gart, shmt1, mthfd1b, shmt2, amt	1134	18	5405	2.38316	0.215275	0.199696
KEGG_PATHWAY	dre03430:Mismatch repair	10	0.0266669	-1.57403	rfc4, rpa2, pold1, exo1, rfc2, pcna, msh6, lig1, pold2, rpa3	1134	22	5405	2.16651	0.253335	0.235002
KEGG_PATHWAY	dre00240:Pyrimidine metabolism	30	0.0491356	-1.3086	prim2, pold1, dtymk, rrm2, pnp6, rrm1, nt5c2b, cant1b, pole, prim1, cmpk2, umps, ctps1a, entpd1, nme2b.1, polr3g, dctpp1, rrm2, nme2a, entpd8, pold2, pola2, pola1, pole2, dctd, dck, tyms, tk1, nt5c1bb, zgc:110540	1134	103	5405	1.38825	0.437916	0.406225
KEGG_PATHWAY	dre04622:RIG-I-like receptor signaling pathway	19	0.0538399	-1.2689	casp8l2, trim25, fadd, irf7, traf6, map3k1, irf3, cyldl, tmem173, ripk1l, tradd, nfkbiaa, casp8, ifih1, ikbke, traf2b, mapk8a, cxcl8a, dhx58	1134	59	5405	1.53491	0.437916	0.406225
KEGG_PATHWAY	dre00100:Steroid biosynthesis	9	0.0547395	-1.2617	sqlea, dhcr24, lipf, nsdhl, lss, msmo1, cyp51, sc5d, hsd17b7	1134	21	5405	2.04271	0.437916	0.406225
KEGG_PATHWAY	dre03440:Homologous recombination	11	0.0644567	-1.19073	rad51d, rad51b, rpa2, pold1, rad51, rad54b, brca2, rad54l, eme1, pold2, rpa3	1134	29	5405	1.80791	0.489871	0.45442
KEGG_PATHWAY	dre03410:Base excision repair	13	0.0695396	-1.15777	neil1, pold1, pcna, neil3, parp2, pold2, pole2, parp4, zgc:110224, pole, fen1, CT025742.1, lig1	1134	37	5405	1.67465	0.503334	0.466909
KEGG_PATHWAY	dre04330:Notch signaling pathway	18	0.0831439	-1.08017	maml1, her9, notch2, si:dkey-40c23.2, her15.1, dlb, mfng, zgc:66440, notch1b, dlc, dvl2, jag1b, dla, dld, dvl3a, notch1a, jag1a, lfng	1134	58	5405	1.4792	0.574449	0.532877
KEGG_PATHWAY	dre00380:Tryptophan metabolism	15	0.0978406	-1.00948	IL4I1, haao, ogdhl, tph1a, ddc, acat2, cyp1b1, aanat1, si:ch211-127i16.2, ido1, hadhaa, ehhadh, kmo, aldh9a1a.1, hadh	1134	47	5405	1.52116	0.621404	0.576434
KEGG_PATHWAY	dre00980:Metabolism of xenobiotics by cytochrome P450	13	0.0981165	-1.00826	ugt2a4, dhdhl, mgst2, cbr1l, zgc:101723, gstt1a, gsto2, cyp1b1, mgst3a, gstt1b, ugt5g1, adh5, gstp1	1134	39	5405	1.58877	0.621404	0.576434

## Sheet: KEGG_14dpl
Category	Term	Count	PValue	log10(Pvalue)	Genes	List.Total	Pop.Hits	Pop.Total	Fold.Enrichment	Benjamini	FDR
KEGG_PATHWAY	dre05168:Herpes simplex infection	31	0.000122342	-3.91242	cdk2, per1a, irf3, cfp, irf9, per1b, cdk1, ifih1, per2, mhc2b, casp3a, arntl1b, ikbke, ifngr1l, skp2, per3, fas, tlr3, pkz, stat1b, cfp, cdc34a, cd74a, zgc:153759, si:busm1-194e12.11, arntl1a, fosaa, fosab, casp8, mapk8a, tlr9	445	180	5405	2.09182	0.00814043	0.00789923
KEGG_PATHWAY	dre00100:Steroid biosynthesis	9	0.000151865	-3.81854	sqlea, ebp, dhcr24, nsdhl, lss, msmo1, cyp51, sc5d, hsd17b7	445	21	5405	5.20546	0.00814043	0.00789923
KEGG_PATHWAY	dre04330:Notch signaling pathway	15	0.000180898	-3.74257	her9, notch2, her15.1, dlb, mfng, notch1b, dlc, dvl2, jag1b, dla, dld, dvl3a, notch1a, jag1a, lfng	445	58	5405	3.14122	0.00814043	0.00789923
KEGG_PATHWAY	dre04115:p53 signaling pathway	16	0.000599719	-3.22205	cdk2, ccne1, gadd45ba, gtse1, fas, serpine1, rprma, igf1, gadd45bb, cdk1, casp8, ccnd1, perp, casp3a, ddb2, cd82b	445	72	5405	2.69913	0.0202405	0.0196408
KEGG_PATHWAY	dre04512:ECM-receptor interaction	16	0.00212717	-2.6722	col1a1b, col4a1, hspg2, col2a1a, itgb6, itgb4, lamc3, col1a2, fn1a, col6a1, thbs4a, lamb1a, col1a1a, itga9, itgb5, lama1	445	81	5405	2.39922	0.0537605	0.0521676
KEGG_PATHWAY	dre04310:Wnt signaling pathway	26	0.00238936	-2.62172	fzd7b, camk2d1, nkd1, nfatc4, lrp5, nkd2a, dvl2, nfatc1, dvl3a, fzd10, fzd4, fzd2, vangl2, tbl1x, gpc4, rac2, dkk2, tcf7l1a, fosl1a, sfrp1a, fzd7a, ccnd1, wnt3a, wnt7bb, wnt5b, mapk8a	445	168	5405	1.87975	0.0537605	0.0521676
KEGG_PATHWAY	dre04110:Cell cycle	21	0.00844461	-2.07342	cdc7, cdk2, mad2l1, ccne1, gadd45ba, skp2, bub1, cdc6, ccna2, mcm3, smad3a, plk1, gadd45bb, mcm5, mcm6, cdk1, e2f1, ccnd1, cdkn1ca, mcm2, mcm4	445	138	5405	1.84831	0.16286	0.158035
KEGG_PATHWAY	dre04060:Cytokine-cytokine receptor interaction	20	0.0170096	-1.76931	il2rb, csf1rb, ifngr1l, tnfrsf1b, fas, clcf1, prlra, cxcr4b, ccr9a, tnfrsf19, zgc:153759, csf3r, tnfsf10, il2rga, csf1ra, bmp7b, cxcr3.2, tnfsf12, il13ra1, zmp:0000000936	445	138	5405	1.7603	0.287037	0.278532
KEGG_PATHWAY	dre04620:Toll-like receptor signaling pathway	15	0.0305	-1.5157	tlr5b, irf3, tlr3, irak1, stat1b, tlr5a, ripk1l, fosaa, fosab, casp8, pik3r5, ctsk, ikbke, mapk8a, tlr9	445	99	5405	1.84031	0.427373	0.41471
KEGG_PATHWAY	dre04510:Focal adhesion	30	0.0316572	-1.49953	col1a1b, pdgfra, mylk4b, parvaa, lamc3, mylk5, pdgfrb, col6a1, thbs4a, lamb1a, erbb2, pak2a, met, lama1, rock2b, col4a1, col2a1a, itgb6, rac2, itgb4, igf1, col1a2, fn1a, ccnd1, capn2a, pik3r5, col1a1a, itga9, mapk8a, itgb5	445	248	5405	1.46928	0.427373	0.41471
KEGG_PATHWAY	dre04810:Regulation of actin cytoskeleton	31	0.0547903	-1.2613	pip5k1bb, pdgfra, mylk4b, cyfip1, mylk5, f2r, wasa, cfl1l, pdgfrb, scinla, fgf1a, fgfr4, itgae.2, itgb2, arpc1b, wasb, pak2a, tmsb, rock2b, itgb6, iqgap1, wasf2, rac2, itgb4, fn1a, pik3r5, scinlb, itga9, NCKAP1L, baiap2b, itgb5	445	271	5405	1.3894	0.672427	0.652503
KEGG_PATHWAY	dre04520:Adherens junction	14	0.0642894	-1.19186	iqgap1, wasf2, rac2, smad3a, wasa, ptprja, tcf7l1a, erbb2, ptpn6, wasb, farp2, met, ctnna1, baiap2b	445	100	5405	1.70045	0.723255	0.701825
KEGG_PATHWAY	dre05132:Salmonella infection	13	0.0927036	-1.0329	rock2b, ifngr1l, tlr5b, wasf2, rhogb, tlr5a, wasa, fosaa, fosab, arpc1b, wasb, pkn2, mapk8a	445	96	5405	1.64478	0.962692	0.934167
