# Supplementary material for: Brain Regeneration Resembles Brain Cancer at Its Early Wound Healing Stage and Diverges From Cancer Later at Its Proliferation and Differentiation Stages
Source: Front Cell Dev Biol. 2022 Feb 10;10:813314. doi: 10.3389/fcell.2022.813314 (PMC8868567; doi:10.3389/fcell.2022.813314)
Supplement: Supplementary file 7 [file Table10.XLSX]

## Sheet: 1dpl-LGG_unshared_genes
Supplementary Table 10: KEGG pathways are enriched based on transcriptional changes in comparison of three different stages of zebrafish brain regeneration with LGG (E) and GBM (F) by using zebrafish identifiers of DEGs unique to zebrafish brain regeneration.
Category	Term	Count	PValue	log10(Pvalue)	Genes	List.Total	Pop.Hits	Pop.Total	Fold.Enrichment	Benjamini	FDR
KEGG_PATHWAY	dre03050:Proteasome	36	8.93304e-12	-11.049	psmb5, psmb3, psmd6, psmb6, psma3, psmd11b, psma6l, psmd13, psma4, psme3, psmd14, psmc6, psmd7, si:rp71-45k5.4, psmb2, psma1, psma6b, psmd11a, psmd4b, psmc1b, psmb10, psma6a, psmb4, psmd12, psmc2, psma5, psmb7, psmc5, psmc3, pomp, psmb1, psme2, psmd3, psma8, psmc4, psmd4a	1143	55	5405	3.0952	1.33996e-09	1.32209e-09
KEGG_PATHWAY	dre00190:Oxidative phosphorylation	64	1.23151e-10	-9.90956	cox8a, mt-nd4, ndufs6, mt-atp6, mt-co3, mt-nd3, atp5pf, ndufa12, mt-nd5, ppa1b, ndufab1b, cox5aa, sdhc, atp5l, atp5f1d, NDUFC1, ndufb2, ndufb10, ndufb4, cyc1, atp5po, mt-cyb, ndufa11, ndufab1a, mt-nd2, ndufa3, cox6b2, cox4i1, mt-nd1, atp5meb, COX5B, atp5mf, ndufb3, tcirg1b, cox7a2a, cox6b1, atp5mc1, ndufs4, atp6v1g1, ndufa2, atp5f1e, atp5f1c, cox6a1, ndufa7, ndufa6, ndufb6, ndufb9, cox7c, uqcrh, …	1143	140	5405	2.16173	9.23632e-09	9.11317e-09
KEGG_PATHWAY	dre03010:Ribosome	49	5.25368e-05	-4.27954	mrpl13, mrpl23, rps26, rpl9, mrps17, rps15, mrpl34, si:dkey-17e16.10, rpl28, mrps18c, rplp2, mrpl27, mrpl19, mrpl12, mrpl28, mrps16, rps21, mrpl21, mrpl17, rpl36, rps15a, rpl36a, mrpl4, rps17, mrps11, mrpl16, rps27.2, mrps10, mrpl18, uba52, mrps7, mrps21, mrpl35, rpl32, rps27a, rps27.1, mrps18a, rps26l, rpl7a, rpl31, rpl38, rpl15, mrpl32, mrps6, mrpl14, mrpl3, mrpl30, mrps2, mrpl1	1143	134	5405	1.72918	0.00262684	0.00259182
KEGG_PATHWAY	dre04210:Apoptosis	28	0.00204201	-2.68994	fadd, cycsb, capn2b, tnfsf10, pik3cd, pik3ca, zgc:153993, cflara, csf2rb, fas, map3k14a, bcl2l1, apaf1, pik3r2, pik3cg, tradd, casp7, hdr, nfkbiaa, akt3b, bcl2b, casp8, capn2a, endog, pik3r5, akt2l, tnfrsf1a, capn1a	1143	75	5405	1.76541	0.0765752	0.0755542
KEGG_PATHWAY	dre04623:Cytosolic DNA-sensing pathway	16	0.00992732	-2.00317	irf7, irf3, tmem173, ripk3, nfkbiaa, polr1c, caspa, polr3f, polr2l, pycard, polr2eb, polr2f, polr2k, polr2h, ikbke, polr3k	1143	39	5405	1.94001	0.289548	0.285688
KEGG_PATHWAY	dre05132:Salmonella infection	31	0.0124836	-1.90366	arpc5b, tlr5b, jun, arpc4, rhogb, pfn2, arpc1a, wasa, arpc3, actb2, caspa, mapk8b, arpc1b, wasb, rac1a, cxcl8a, rhogc, rhogd, arpc5a, cdc42l, si:ch211-153j24.3, fosaa, fosab, arpc4l, pycard, flnca, arpc2, flncb, actb1, myd88, mapk8a	1143	96	5405	1.527	0.289548	0.285688
KEGG_PATHWAY	dre04141:Protein processing in endoplasmic reticulum	52	0.0135123	-1.86927	ube2g2, herpud1, calr3b, mogs, hspbp1, dnajb11, mapk8b, sec31b, hsp90b1, ube2d2l, ddost, sec61g, eif2s1b, zgc:175088, ubxn6, rbx1, erlec1, dnajb12a, dnajb1a, ube2g1a, bcl2b, ssr3, calr3a, capn2a, edem1, nsfl1c, mapk8a, pdia3, ube2d1a, capn2b, rrbp1b, rrbp1a, ube2g1b, derl2, rpn1, hspa5, dnajc3a, ckap4, zgc:153993, pkz, map2k7, canx, derl1, pdia6, dnajb2, ube2d1b, RNF5, ube2j1, xbp1, si:ch211-1i11…	1143	181	5405	1.35855	0.289548	0.285688
KEGG_PATHWAY	dre04630:Jak-STAT signaling pathway	34	0.0171241	-1.76639	il6st, socs3b, socs2, socs5b, il4, il21, pim2, irf9, cishb, crfb4, il11a, pik3cd, il21r.1, il13ra1, ccnd2a, pik3ca, stat5a, csf2rb, lifra, cish, bcl2l1, stat1b, jak1, socs1a, pik3r2, pik3cg, csf3r, pias1b, ep300a, akt3b, ptpn11b, pik3r5, ptpn6, akt2l	1143	110	5405	1.46162	0.297204	0.293242
KEGG_PATHWAY	dre03008:Ribosome biogenesis in eukaryotes	25	0.0178323	-1.74879	utp15, rpp25l, eif6, gnl3l, imp4, rpp30, zgc:86811, riok1, si:dkey-251i10.3, ran, nhp2, nop58, rpp40, utp6, gnl3, nat10, rrp7a, bms1, riok2, wdr3, utp4, rcl1, pop4, nop10, nop56	1143	75	5405	1.57626	0.297204	0.293242
KEGG_PATHWAY	dre03020:RNA polymerase	12	0.0285817	-1.54391	polr2c, polr2i, polr1c, polr3f, polr2d, polr2l, polr2eb, polr2f, polr2k, polr2h, polr3k, twistnb	1143	29	5405	1.95674	0.428726	0.423009
KEGG_PATHWAY	dre00240:Pyrimidine metabolism	31	0.0330548	-1.48076	tk2, twistnb, rrm1, nt5c2b, polr2c, polr2i, polr3f, nme3, polr2d, polr2f, polr2k, umps, polr2h, polr3k, ctps1a, cmpk, entpd1, tymp, nme2b.1, dctpp1, si:dkey-28b4.7, entpd8, entpd5a, pola2, dctd, dck, polr1c, nt5c1aa, pole3, polr2l, polr2eb	1143	103	5405	1.42323	0.450748	0.444738
KEGG_PATHWAY	dre03030:DNA replication	14	0.0426336	-1.37025	ssbp1, si:dkey-28b4.7, rpa3, pola2, rpa2, mcm6, rfc2, pole3, fen1, mcm2, mcm4, zgc:110269, lig1, rfc3	1143	38	5405	1.74218	0.53292	0.525814
KEGG_PATHWAY	dre00230:Purine metabolism	51	0.0478408	-1.3202	adssl1, nudt9, CABZ01079080.1, zgc:86811, polr2c, polr2i, polr3f, nme3, polr2d, polr2f, polr2k, PDE3B, ampd3b, itpa, pde4ba, polr3k, si:ch211-132f19.7, si:dkey-28b4.7, pde10a, dguok, enpp4, enpp1, pde11a, polr1c, nt5c1aa, pde5ab, polr2l, polr2eb, atic, ada, pgm2, twistnb, rrm1, nt5c2b, ada2b, adssl, adsl, adcy6a, npr1a, pde6gb, polr2h, entpd1, nme2b.1, ppat, pde8b, entpd8, entpd5a, pola2, dck, po…	1143	190	5405	1.26931	0.552009	0.544649
KEGG_PATHWAY	dre04620:Toll-like receptor signaling pathway	29	0.0544301	-1.26416	fadd, ticam1, tlr5b, jun, irf3, mapk8b, pik3cd, ikbke, rac1a, cxcl8a, pik3ca, irf5, irf7, map2k7, stat1b, pik3r2, pik3cg, si:ch211-153j24.3, map3k8, nfkbiaa, fosaa, fosab, akt3b, casp8, pik3r5, ctsk, akt2l, myd88, mapk8a	1143	99	5405	1.3852	0.58318	0.575404
KEGG_PATHWAY	dre05168:Herpes simplex infection	48	0.0604417	-1.21866	traf1, cdk2, socs3b, fadd, ticam1, cycsb, per1a, eef1da, jun, irf3, cfp, srsf3b, c3a.1, irf9, per1b, mapk8b, per2, ikbke, eif2s1b, hcfc1b, irf7, skp2, srsf6a, alyref, per3, fas, pkz, stat1b, jak1, cfp, cdc34a, cd74a, zgc:153759, srsf1a, c1qbp, tnfb, ep300a, si:ch211-153j24.3, ube2r2, srpk1b, nfkbiaa, fosaa, fosab, ptpn11b, casp8, tnfrsf1a, myd88, mapk8a	1143	180	5405	1.26101	0.604417	0.596358
KEGG_PATHWAY	dre04144:Endocytosis	76	0.074939	-1.12529	igf1ra, grk5l, rbsn, grk7b, asap2b, acap1, rab5ab, unm_sa1614, cyth1a, rab11fip3, src, arpc1a, capza1a, ehd1b, arpc3, rab8a, cav1, rab22a, cyth4b, arpc1b, ehd2b, grk4, CYTH2, snx1a, ehd1a, washc3, chmp4bb, pip5k1ca, clint1a, wash1, cdc42l, zgc:162872, arpc4l, asap1b, arf6b, zgc:109949, arpc2, zfyve16, BX537113.1, chmp2bb, rhocb, mvb12ba, zgc:194578, arpc5b, vps26bl, arpc4, git2a, pip5kl1, wipf1b,…	1143	305	5405	1.17832	0.702553	0.693186
KEGG_PATHWAY	dre00760:Nicotinate and nicotinamide metabolism	11	0.0828339	-1.08179	mibp2, nt5c2b, naprt, zgc:64002, nt5c1aa, aox6, NMNAT3, mibp, nampta, nadsyn1, enpp1	1143	30	5405	1.73389	0.730888	0.721142

## Sheet: 1dpl-GBM_unshared_genes
Category	Term	Count	PValue	log10(Pvalue)	Genes	List.Total	Pop.Hits	Pop.Total	Fold.Enrichment	Benjamini	FDR
KEGG_PATHWAY	dre03050:Proteasome	32	1.2559e-11	-10.901	psmc1a, psmb5, psmd6, psmb6, psma3, psmd11b, psmd8, psma6l, psmd13, psma4, psme3, psmd14, psmc6, psmd7, si:rp71-45k5.4, psmb2, psma1, psma6b, psmd11a, psmd4b, psmc1b, psma6a, psmd12, psma5, psmb7, psmc5, psmc3, pomp, psmd3, psma8, psmc4, psmd4a	886	55	5405	3.54935	1.83361e-09	1.82106e-09
KEGG_PATHWAY	dre00190:Oxidative phosphorylation	55	1.36053e-10	-9.86629	cox8a, ndufs6, mt-atp6, atp5pf, ndufa12, ndufab1b, cox5aa, sdhc, atp5l, atp5f1d, NDUFC1, ndufb2, ndufb10, ndufb4, cyc1, atp5po, cox5ab, ndufa11, ndufab1a, ndufa3, atp6v0a2b, cox6b2, cox4i1, atp5meb, cox7a3, COX5B, atp5mf, ndufb3, cox7a2a, ndufa4l, cox6b1, atp5mc1, ndufs4, ndufa2, atp5f1e, atp5f1c, cox6a1, ndufa6, ndufb6, ndufb9, cox7c, uqcrh, cox17, ndufv2, ndufa1, ndufc2, ndufb5, atp5pd, atp6v1f…	886	140	5405	2.39661	9.9319e-09	9.86387e-09
KEGG_PATHWAY	dre03010:Ribosome	41	5.88535e-05	-4.23023	rpl3, rps17, mrps11, mrpl24, mrpl16, rps27.2, rps26, mrps17, mrps10, mrpl18, mrps7, mrpl34, si:dkey-17e16.10, mrps18c, rplp2, mrps21, rpl32, mrpl27, mrpl19, mrpl12, rps27a, mrpl28, mrps16, rps27.1, mrps18a, rps26l, rpl7a, mrpl21, rpl31, mrpl17, rpl37, rps24, rpl15, rps15a, mrpl14, rpl36a, rpl22, mrpl30, mrpl4, mrps2, mrpl1	886	134	5405	1.86656	0.0028642	0.00284458
KEGG_PATHWAY	dre04210:Apoptosis	22	0.00742601	-2.12924	pik3ca, zgc:153993, cflara, csf2rb, cycsb, fas, bcl2l1, capn2b, pik3r2, tradd, tnfsf10, hdr, nfkbiaa, akt3b, bcl2b, casp8, capn2a, endog, pik3cd, akt2l, tnfrsf1a, capn1a	886	75	5405	1.78947	0.27105	0.269193
KEGG_PATHWAY	dre04141:Protein processing in endoplasmic reticulum	42	0.0158247	-1.80067	ube2d1a, ube2g2, herpud1, capn2b, calr3b, rrbp1b, rrbp1a, mogs, hspbp1, derl2, ube2g1b, dnajb11, sec31b, hsp90b1, dnajc3a, ube2d2l, ero1a, ckap4, zgc:153993, eif2s1b, zgc:175088, erlec1, rbx1, pkz, map2k7, ube2g1a, derl1, prkcsh, bcl2b, hyou1, dnajb2, calr3a, ube2d1b, capn2a, edem1, RNF5, xbp1, ube2j1, nsfl1c, si:ch211-1i11.3, capn1a, sil1	886	181	5405	1.41557	0.46208	0.458915
KEGG_PATHWAY	dre03008:Ribosome biogenesis in eukaryotes	20	0.0301745	-1.52036	utp15, gnl3, rpp25l, gnl3l, nat10, imp4, rpp30, zgc:86811, riok2, wdr75, utp4, riok1, ran, si:dkey-251i10.3, rcl1, fcf1, pop4, nhp2, nop56, nop58	886	75	5405	1.62679	0.734246	0.729217
KEGG_PATHWAY	dre05132:Salmonella infection	23	0.0582414	-1.23477	rhogc, rhogd, tlr5b, jun, rhogb, rilp, arpc4, pfn2, arpc1a, wasa, cdc42l, si:ch211-153j24.3, fosaa, caspa, fosab, arpc4l, pycard, flnca, flncb, arpc2, actb1, rac1a, cxcl8a	886	96	5405	1.46157	1	1
KEGG_PATHWAY	dre00601:Glycosphingolipid biosynthesis - lacto and neolacto series	9	0.0616092	-1.21035	st3gal4, b3gnt3.4, b3gnt2b, b4galt2, b3galt1a, st3gal3b, b4galt1l, b4galt3, st8sia1	886	27	5405	2.03348	1	1
KEGG_PATHWAY	dre05168:Herpes simplex infection	38	0.0778303	-1.10885	traf1, cdk2, socs3b, ticam1, cycsb, per1a, eef1da, jun, irf3, cfp, c3a.1, irf9, per1b, nop53, eif2s1b, hcfc1b, srsf6a, alyref, fas, pkz, stat1b, jak1, cfp, cdc34a, cd74a, zgc:153759, srsf1a, tnfb, ep300a, si:ch211-153j24.3, ube2r2, srpk1b, nfkbiaa, fosaa, fosab, ptpn11b, casp8, tnfrsf1a	886	180	5405	1.28787	1	1
KEGG_PATHWAY	dre04630:Jak-STAT signaling pathway	25	0.0800455	-1.09666	il6st, socs3b, socs5b, il4, il21, pim2, irf9, cishb, crfb4, il11a, pik3cd, il21r.1, il13ra1, ccnd2a, pik3ca, csf2rb, lifra, bcl2l1, stat1b, jak1, pik3r2, ep300a, akt3b, ptpn11b, akt2l	886	110	5405	1.38647	1	1
KEGG_PATHWAY	dre03020:RNA polymerase	9	0.0886683	-1.05223	polr2c, polr2i, polr3f, polr2d, polr2eb, polr1d, polr2k, polr3k, twistnb	886	29	5405	1.89324	1	1
KEGG_PATHWAY	dre04260:Cardiac muscle contraction	22	0.0947865	-1.02325	cox7a2a, cox8a, cox6b1, myh7ba, cacng5b, cyc1, atp1b4, tpm4a, cacnb4a, cox5ab, cox6a1, tpm3, cox7c, cox6b2, uqcrh, cox4i1, tpma, cox5aa, cacna1fa, cox7a3, ACTC1, COX5B	886	96	5405	1.39802	1	1

## Sheet: 3dpl-LGG_unshared_genes
Category	Term	Count	PValue	log10(Pvalue)	Genes	List.Total	Pop.Hits	Pop.Total	Fold.Enrichment	Benjamini	FDR
KEGG_PATHWAY	dre04060:Cytokine-cytokine receptor interaction	49	1.10882e-09	-8.95514	il7r, il21, tnfsf10, il2rga, tnfrsf9a, tgfb3, il6r, il13ra1, cxcl8a, csf1rb, fas, tnfb, csf3r, cxcr3.2, BX537113.1, tnfrsf1a, ngfrb, cxcl11.1, ifng1, il2rb, il6st, cxcr3.1, nradd, epor, osmr, il6, crfb4, il11a, faslg, il21r.1, si:dkey-13m1.2, tgfb2, cd27, tnfrsf1b, csf2rb, relt, il12rb2, ngfra, clcf1, zgc:153759, tgfb1a, il17ra1a, csf1ra, tgfb1b, tnfsf13, tnfsf12, xcr1a.1, cd40, zmp:0000000936	782	138	5405	2.45418	1.65214e-07	1.56343e-07
KEGG_PATHWAY	dre04210:Apoptosis	30	1.76566e-07	-6.75309	casp8l2, fadd, CAPN1, akt1, zgc:55262, tnfsf10, faslg, casp3a, badb, cflara, csf2rb, bida, tnfrsfa, fas, casp3b, map3k14a, ripk1l, apaf1, pik3cg, tradd, baxa, casp7, bcl2a, nfkbiaa, casp8, capn2a, pik3r5, akt2l, tnfrsf1a, traf2b	782	75	5405	2.76471	1.31542e-05	1.24479e-05
KEGG_PATHWAY	dre04620:Toll-like receptor signaling pathway	35	4.43137e-07	-6.35346	casp8l2, fadd, ticam1, akt1, tlr5b, traf6, jun, irf3, stat1a, il6, rac1b, ikbke, rac1a, cxcl8a, irf5, irf7, tlr3, stat1b, tlr5a, ripk1l, pik3cg, si:ch211-153j24.3, map3k8, nfkbiaa, tlr1, fosaa, fosab, casp8, pik3r5, ctsk, akt2l, myd88, cd40, cxcl11.1, mapk8a	782	99	5405	2.44355	2.20091e-05	2.08274e-05
KEGG_PATHWAY	dre05168:Herpes simplex infection	47	4.73267e-05	-4.32489	ifng1, traf1, cdk2, casp8l2, socs3b, fadd, ticam1, mhc2dab, traf6, per1a, eef1da, jun, irf3, stat1a, cfp, c3a.1, irf9, il6, ifih1, faslg, mhc2b, casp3a, ikbke, irf7, skp2, fas, tlr3, casp3b, pkz, stat1b, jak1, cfp, cdc34a, cd74a, zgc:153759, si:busm1-194e12.11, tnfb, si:ch211-153j24.3, nfkbiaa, fosaa, fosab, casp8, tnfrsf1a, myd88, traf2b, mapk8a, si:busm1-266f07.2	782	180	5405	1.80474	0.00176292	0.00166827
KEGG_PATHWAY	dre05132:Salmonella infection	28	0.000341866	-3.46614	ifng1, arpc5b, tlr5b, jun, pkn3, arpc4, rhogb, wasa, actb2, caspa, il6, rac1b, arpc1b, wasb, rac1a, cxcl8a, rhogd, arpc5a, tlr5a, cdc42l, si:ch211-153j24.3, fosaa, fosab, pycard, flnca, actb1, myd88, mapk8a	782	96	5405	2.01593	0.0101876	0.00964061
KEGG_PATHWAY	dre04145:Phagosome	39	0.000457382	-3.33972	tcirg1b, ctsla, tubb4b, ctss2.1, mhc2dab, tuba8l3, itgb1a, calr3b, c3a.1, itga2.2, colec11, mrc1b, tuba8l4, tubb5, stx7l, actb2, rac1b, itgb2, mhc2b, itgb3b, tcirg1a, ncf1, rac1a, sec61g, cyba, tuba1b, pla2r1, tuba8l, marco, zgc:55461, canx, si:busm1-194e12.11, atpv0e2, ctss2.2, itga5, calr3a, actb1, si:busm1-266f07.2, itgb5	782	154	5405	1.75038	0.0113583	0.0107485
KEGG_PATHWAY	dre04630:Jak-STAT signaling pathway	30	0.00068143	-3.16658	il2rb, ifng1, il6st, socs3b, akt1, il7r, stat1a, il21, irf9, epor, il2rga, osmr, il6, crfb4, il11a, il21r.1, si:dkey-13m1.2, il6r, il13ra1, csf2rb, il12rb2, stat1b, jak1, socs1a, pik3cg, csf3r, pik3r5, ptpn6, pim1, akt2l	782	110	5405	1.88503	0.0145047	0.013726
KEGG_PATHWAY	dre04512:ECM-receptor interaction	23	0.00194298	-2.71153	col1a1b, col4a2, hspg2, col2a1a, itgb1a, lama4, vwf, col4a5, itgb4, lamc3, sv2, itga2.2, itga5, lamb1a, lamc1, col5a1, itga3b, col1a1a, itgb3b, sdc4, cd44b, itgb5, lama1	782	81	5405	1.9626	0.0361879	0.0342449
KEGG_PATHWAY	dre04510:Focal adhesion	53	0.00276588	-2.55817	col1a1b, col4a2, pak4, mylk4b, itgb1a, col4a5, parvaa, lamc3, rap1b, vaspb, actb2, myl9a, lamb1a, erbb2, rac1a, pik3cg, cdc42l, itga5, capn2a, pik3r5, itga3b, flnca, akt2l, actb1, rhocb, mapk8a, itgb5, akt1, ilk, vaspa, jun, pdgfrb, itga2.2, rac1b, col5a1, kdr, badb, itgb3b, met, lama1, col2a1a, zyx, pdgfd, lama4, vwf, rac2, itgb4, bcl2a, myl9b, pdgfba, parvg, lamc1, col1a1a	782	248	5405	1.47711	0.0457907	0.0433322
KEGG_PATHWAY	dre04622:RIG-I-like receptor signaling pathway	18	0.00314487	-2.5024	casp8l2, trim25, fadd, irf7, traf6, irf3, cyldl, tmem173, ripk1l, tradd, nfkbiaa, casp8, ifih1, ikbke, traf2b, mapk8a, cxcl8a, dhx58	782	59	5405	2.10867	0.0468586	0.0443427
KEGG_PATHWAY	dre03050:Proteasome	16	0.00932591	-2.03031	psmb5, ifng1, psmd4b, psmf1, psmb10, psma6a, psmb3, psma5, psma6l, psma4, psmb1, psme2, si:rp71-45k5.4, psma8, psma1, psmb2	782	55	5405	2.0107	0.126324	0.119541
KEGG_PATHWAY	dre04920:Adipocytokine signaling pathway	21	0.0186648	-1.72898	acsl1b, tnfrsf1b, socs3b, akt1, irs2b, prkag2b, ppargc1a, rxrgb, npy, prkag3a, tradd, pck2, irs2a, nfkbiaa, nfkbie, akt2l, cpt1ab, tnfrsf1a, rxraa, traf2b, mapk8a	782	86	5405	1.68776	0.21744	0.205765
KEGG_PATHWAY	dre04623:Cytosolic DNA-sensing pathway	12	0.0189713	-1.7219	ripk3, polr3g, nfkbiaa, irf7, mb21d1, caspa, il6, irf3, pycard, tmem173, ripk1l, ikbke	782	39	5405	2.1267	0.21744	0.205765
KEGG_PATHWAY	dre04110:Cell cycle	30	0.0215834	-1.66588	cdc7, cdk2, cdkn1a, ccne1, pttg1, orc3, orc4, orc6, plk1, cdc25b, mcm6, e2f1, tgfb3, mcm2, tgfb2, mcm4, bub1bb, ccnb1, mad2l1, gadd45aa, e2f3, skp2, cdc6, E2F2, smad3a, anapc10, orc5, gadd45bb, tgfb1a, tgfb1b	782	138	5405	1.50256	0.229709	0.217376
KEGG_PATHWAY	dre00100:Steroid biosynthesis	8	0.0235892	-1.62729	sqlea, lipf, nsdhl, lss, msmo1, cyp51, sc5d, hsd17b7	782	21	5405	2.63305	0.232712	0.220217
KEGG_PATHWAY	dre04115:p53 signaling pathway	18	0.0249892	-1.60225	cdk2, casp8l2, cdkn1a, ccne1, gadd45aa, bida, sesn2, fas, casp3b, apaf1, gadd45bb, baxa, pmaip1, casp8, si:dkey-42i9.6, perp, casp3a, ccnb1	782	72	5405	1.72794	0.232712	0.220217
KEGG_PATHWAY	dre00980:Metabolism of xenobiotics by cytochrome P450	11	0.0460497	-1.33677	ugt2a4, gsto2, dhdhl, cyp1b1, gstt1b, mgst2, cbr1l, ugt5g1, gstp1, adh5, gstt1a	782	39	5405	1.94947	0.403612	0.381942
KEGG_PATHWAY	dre04530:Tight junction	23	0.061312	-1.21245	myh9b, hcls1, cldn11a, f11r.1, patj, cldn7a, jam3b, cldn5a, cdc42l, mpp5a, cldn5b, myl9b, actb2, myl9a, myh11a, cldnh, myh9a, pard6a, actb1, cgna, rhocb, cldn10a, cldn11b	782	109	5405	1.45845	0.507527	0.480277
KEGG_PATHWAY	dre03030:DNA replication	10	0.0873761	-1.05861	dna2, rpa2, mcm6, rfc2, fen1, mcm2, mcm4, lig1, rpa3, pola2	782	38	5405	1.81889	0.685212	0.648422

## Sheet: 3dpl-GBM_unshared_genes
Category	Term	Count	PValue	log10(Pvalue)	Genes	List.Total	Pop.Hits	Pop.Total	Fold.Enrichment	Benjamini	FDR
KEGG_PATHWAY	dre04060:Cytokine-cytokine receptor interaction	41	5.47352e-10	-9.26173	ifng1, il6st, il7r, tnfrsf11a, il21, tnfsf10, nradd, epor, osmr, tnfrsf9a, il6, crfb4, il11a, tgfb3, il21r.1, si:dkey-13m1.2, il6r, il13ra1, cd27, cxcl8a, csf1rb, csf2rb, relt, il12rb2, fas, zgc:153759, tnfb, tgfb1a, il17ra1a, csf1ra, tgfb1b, tnfsf13, bmp7b, cxcr3.2, BX537113.1, tnfsf12, tnfrsf1a, xcr1a.1, cd40, cxcl11.1, zmp:0000000936	560	138	5405	2.86756	7.71766e-08	7.38925e-08
KEGG_PATHWAY	dre05168:Herpes simplex infection	38	2.67917e-05	-4.572	ifng1, traf1, cdk2, socs3b, ticam1, mhc2dab, traf6, per1a, eef1da, jun, irf3, stat1a, cfp, c3a.1, irf9, il6, mhc2b, nop53, fas, tlr3, pkz, stat1b, jak1, cfp, cdc34a, cd74a, zgc:153759, si:busm1-194e12.11, tnfb, si:ch211-153j24.3, nfkbiaa, eef1db, fosaa, fosab, casp8, tnfrsf1a, traf2b, si:busm1-266f07.2	560	180	5405	2.0376	0.00188881	0.00180844
KEGG_PATHWAY	dre04620:Toll-like receptor signaling pathway	23	0.000373727	-3.42745	ticam1, akt1, tlr5b, traf6, jun, irf3, tlr3, stat1a, stat1b, tlr5a, si:ch211-153j24.3, nfkbiaa, tlr1, fosaa, fosab, casp8, il6, rac1b, akt2l, cxcl11.1, cd40, rac1a, cxcl8a	560	99	5405	2.24233	0.0166503	0.0159417
KEGG_PATHWAY	dre04210:Apoptosis	19	0.000472348	-3.32574	cflara, csf2rb, CAPN1, akt1, bida, zgc:55262, fas, tnfrsfa, tradd, baxa, tnfsf10, bcl2a, nfkbiaa, casp8, capn2a, akt2l, badb, tnfrsf1a, traf2b	560	75	5405	2.44512	0.0166503	0.0159417
KEGG_PATHWAY	dre04630:Jak-STAT signaling pathway	24	0.000696301	-3.1572	ifng1, il6st, csf2rb, socs3b, akt1, il12rb2, il7r, stat1a, stat1b, jak1, il21, irf9, epor, osmr, il6, crfb4, il11a, il21r.1, si:dkey-13m1.2, pim1, akt2l, stat6, il6r, il13ra1	560	110	5405	2.10584	0.0196357	0.0188001
KEGG_PATHWAY	dre05132:Salmonella infection	20	0.00382286	-2.41761	ifng1, rhogd, tlr5b, jun, rhogb, tlr5a, arpc4, wasa, cdc42l, si:ch211-153j24.3, fosaa, caspa, fosab, il6, rac1b, pycard, flnca, actb1, rac1a, cxcl8a	560	96	5405	2.01079	0.0898371	0.0860143
KEGG_PATHWAY	dre00980:Metabolism of xenobiotics by cytochrome P450	11	0.00512674	-2.29016	ugt2a4, gsto2, dhdhl, cyp1b1, mgst3a, gstt1b, cbr1l, ugt5g1, gstp1, adh5, gstt1a	560	39	5405	2.7223	0.0937224	0.0897342
KEGG_PATHWAY	dre04330:Notch signaling pathway	14	0.00531758	-2.27429	maml1, her9, si:dkey-40c23.2, her15.1, dlb, zgc:66440, notch1b, dlc, jag1b, dla, dld, dvl3a, notch1a, jag1a	560	58	5405	2.32974	0.0937224	0.0897342
KEGG_PATHWAY	dre04145:Phagosome	27	0.00769672	-2.11369	ctsla, tubb4b, ctss2.1, mhc2dab, tuba8l3, itgb1a, calr3b, c3a.1, itga2.2, colec11, tuba8l4, rac1b, mhc2b, rac1a, tuba1b, pla2r1, tuba8l, marco, vamp3, zgc:55461, si:busm1-194e12.11, atpv0e2, ctss2.2, itga5, calr3a, actb1, si:busm1-266f07.2	560	154	5405	1.6922	0.120582	0.115451
KEGG_PATHWAY	dre00380:Tryptophan metabolism	11	0.0196809	-1.70596	IL4I1, cyp1b1, aanat1, si:ch211-127i16.2, ido1, tph1a, hadhaa, ddc, acat2, ehhadh, kmo	560	47	5405	2.25893	0.2775	0.265692
KEGG_PATHWAY	dre03050:Proteasome	12	0.0230362	-1.63759	psmb5, ifng1, psmd4b, psma4, psmf1, psma6a, si:rp71-45k5.4, psma8, psmb2, psma1, psma5, psma6l	560	55	5405	2.10584	0.295282	0.282717
KEGG_PATHWAY	dre00982:Drug metabolism - cytochrome P450	9	0.0276903	-1.55767	ugt2a4, gsto2, mgst3a, si:ch211-127i16.2, gstt1b, ugt5g1, gstp1, adh5, gstt1a	560	36	5405	2.41295	0.325361	0.311516
KEGG_PATHWAY	dre04115:p53 signaling pathway	14	0.0313365	-1.50395	cdk2, ccne1, cd82a, bida, sesn2, fas, gadd45bb, baxa, pmaip1, casp8, si:dkey-42i9.6, ccne2, perp, cd82b	560	72	5405	1.87674	0.33988	0.325417
KEGG_PATHWAY	dre04672:Intestinal immune network for IgA production	9	0.0489141	-1.31057	si:busm1-194e12.11, tgfb1a, tgfb1b, mhc2dab, tnfsf13, il6, mhc2b, cd40, si:busm1-266f07.2	560	40	5405	2.17165	0.492635	0.471671
KEGG_PATHWAY	dre04920:Adipocytokine signaling pathway	15	0.0565801	-1.24734	acsl1b, socs3b, akt1, irs2b, rxrgb, prkag3a, tradd, irs2a, nfkbiaa, nfkbie, akt2l, cpt1ab, tnfrsf1a, rxraa, traf2b	560	86	5405	1.68345	0.51543	0.493497
KEGG_PATHWAY	dre00100:Steroid biosynthesis	6	0.0584885	-1.23293	sqlea, lipf, nsdhl, lss, msmo1, cyp51	560	21	5405	2.75765	0.51543	0.493497

## Sheet: 14dpl-LGG_unshared_genes
Category	Term	Count	PValue	log10(Pvalue)	Genes	List.Total	Pop.Hits	Pop.Total	Fold.Enrichment	Benjamini	FDR
KEGG_PATHWAY	dre05168:Herpes simplex infection	29	4.36911e-06	-5.35961	cdk2, per1a, irf3, cfp, irf9, per1b, ifih1, per2, mhc2b, casp3a, arntl1b, ikbke, skp2, per3, fas, tlr3, pkz, stat1b, cfp, cdc34a, cd74a, zgc:153759, si:busm1-194e12.11, arntl1a, fosaa, fosab, casp8, mapk8a, tlr9	336	180	5405	2.59168	0.000554877	0.000550508
KEGG_PATHWAY	dre00100:Steroid biosynthesis	8	0.00017991	-3.74494	sqlea, ebp, nsdhl, lss, msmo1, cyp51, sc5d, hsd17b7	336	21	5405	6.12812	0.0114243	0.0113344
KEGG_PATHWAY	dre04512:ECM-receptor interaction	13	0.00385438	-2.41405	col1a1b, hspg2, col2a1a, itgb4, lamc3, col1a2, fn1a, col6a1, thbs4a, lamb1a, col1a1a, itgb5, lama1	336	81	5405	2.58175	0.139122	0.138027
KEGG_PATHWAY	dre04115:p53 signaling pathway	12	0.00438181	-2.35835	gadd45bb, cdk2, ccne1, gadd45ba, casp8, fas, serpine1, rprma, ddb2, perp, casp3a, igf1	336	72	5405	2.68105	0.139122	0.138027
KEGG_PATHWAY	dre04620:Toll-like receptor signaling pathway	14	0.00763955	-2.11693	tlr5b, irf3, tlr3, stat1b, tlr5a, ripk1l, fosaa, fosab, casp8, pik3r5, ctsk, ikbke, mapk8a, tlr9	336	99	5405	2.27483	0.194045	0.192517
KEGG_PATHWAY	dre04310:Wnt signaling pathway	18	0.0301727	-1.52039	fzd2, fzd7b, tbl1x, gpc4, rac2, dkk2, nfatc4, nkd2a, fzd7a, fosl1a, sfrp1a, nfatc1, fzd10, wnt3a, wnt7bb, fzd4, mapk8a, wnt5b	336	168	5405	1.72353	0.638655	0.633627
KEGG_PATHWAY	dre04060:Cytokine-cytokine receptor interaction	15	0.0456452	-1.3406	il2rb, csf1rb, tnfrsf1b, fas, clcf1, prlra, zgc:153759, csf3r, tnfsf10, il2rga, csf1ra, cxcr3.2, tnfsf12, il13ra1, zmp:0000000936	336	138	5405	1.74851	0.724618	0.718912
KEGG_PATHWAY	dre04110:Cell cycle	15	0.0456452	-1.3406	cdc7, cdk2, mad2l1, ccne1, gadd45ba, skp2, cdc6, smad3a, plk1, gadd45bb, mcm6, e2f1, cdkn1ca, mcm2, mcm4	336	138	5405	1.74851	0.724618	0.718912
KEGG_PATHWAY	dre04510:Focal adhesion	23	0.0551414	-1.25852	col1a1b, col2a1a, mylk4b, rac2, parvaa, itgb4, lamc3, igf1, mylk5, col1a2, fn1a, pdgfrb, col6a1, thbs4a, lamb1a, capn2a, pik3r5, erbb2, col1a1a, met, mapk8a, itgb5, lama1	336	248	5405	1.49188	0.778107	0.77198
KEGG_PATHWAY	dre04622:RIG-I-like receptor signaling pathway	8	0.070527	-1.15164	tradd, casp8, ifih1, irf3, ripk1l, ikbke, mapk8a, dhx58	336	59	5405	2.18119	0.895693	0.88864
KEGG_PATHWAY	dre04210:Apoptosis	9	0.0911072	-1.04045	tradd, tnfsf10, zgc:55262, casp8, capn2a, pik3r5, fas, casp3a, ripk1l	336	75	5405	1.93036	1	0.993226
KEGG_PATHWAY	dre04145:Phagosome	15	0.094593	-1.02414	cyba, ctss2.1, tuba8l3, pla2r1, tuba8l, marco, calr3b, si:busm1-194e12.11, mrc1b, tubb5, thbs4a, ctss2.2, itgb2, mhc2b, itgb5	336	154	5405	1.56685	1	0.993226

## Sheet: 14dpl-GBM_unshared_genes
Category	Term	Count	PValue	log10(Pvalue)	Genes	List.Total	Pop.Hits	Pop.Total	Fold.Enrichment	Benjamini	FDR
KEGG_PATHWAY	dre05168:Herpes simplex infection	22	5.03911e-05	-4.29765	cdk2, per1a, fas, irf3, tlr3, pkz, stat1b, cfp, cfp, cdc34a, cd74a, si:busm1-194e12.11, zgc:153759, irf9, per1b, arntl1a, fosaa, fosab, casp8, mhc2b, arntl1b, tlr9	245	180	5405	2.69637	0.00584537	0.00584537
KEGG_PATHWAY	dre04330:Notch signaling pathway	11	0.000224649	-3.6485	dla, jag1b, dld, her9, her15.1, dvl3a, notch1a, dlb, jag1a, notch1b, dlc	245	58	5405	4.18403	0.0130296	0.0130296
KEGG_PATHWAY	dre00100:Steroid biosynthesis	6	0.00201944	-2.69477	sqlea, ebp, nsdhl, lss, msmo1, cyp51	245	21	5405	6.30321	0.078085	0.078085
KEGG_PATHWAY	dre04115:p53 signaling pathway	10	0.00474334	-2.32392	gadd45bb, cdk2, ccne1, gadd45ba, casp8, fas, rprma, perp, cd82b, igf1	245	72	5405	3.06406	0.137557	0.137557
KEGG_PATHWAY	dre04310:Wnt signaling pathway	13	0.0762317	-1.11786	camk2d1, nkd1, tbl1x, gpc4, dkk2, nfatc4, fosl1a, nfatc1, dvl3a, fzd10, wnt3a, fzd4, wnt5b	245	168	5405	1.70712	1	1
KEGG_PATHWAY	dre00982:Drug metabolism - cytochrome P450	5	0.0771435	-1.1127	mgst3a, si:ch211-127i16.2, gstt1b, ugt5g1, adh5	245	36	5405	3.06406	1	1
KEGG_PATHWAY	dre04620:Toll-like receptor signaling pathway	9	0.0774514	-1.11097	fosaa, fosab, tlr5b, casp8, irf3, tlr3, stat1b, tlr5a, tlr9	245	99	5405	2.00557	1	1
KEGG_PATHWAY	dre04060:Cytokine-cytokine receptor interaction	11	0.0929787	-1.03162	zgc:153759, csf1rb, tnfsf10, csf1ra, fas, prlra, bmp7b, cxcr3.2, tnfsf12, il13ra1, zmp:0000000936	245	138	5405	1.7585	1	1
KEGG_PATHWAY	dre00980:Metabolism of xenobiotics by cytochrome P450	5	0.0972003	-1.01233	ephx1, mgst3a, gstt1b, ugt5g1, adh5	245	39	5405	2.82836	1	1
