# Supplementary material for: Brain Regeneration Resembles Brain Cancer at Its Early Wound Healing Stage and Diverges From Cancer Later at Its Proliferation and Differentiation Stages
Source: Front Cell Dev Biol. 2022 Feb 10;10:813314. doi: 10.3389/fcell.2022.813314 (PMC8868567; doi:10.3389/fcell.2022.813314)
Supplement: Supplementary file 8 [file Table5.XLSX]

## Sheet: vst counts by module
Supplementary Table 5: Variance-stabilizing transformed (vst) counts gene by module.
ZebrafishID	GeneName	Module	Ctrl-1	Ctrl-2	Ctrl-3	Ctrl-4	Ctrl-5	1dpl-1	1dpl-2	1dpl-3	1dpl-4	1dpl-5	3dpl-1	3dpl-2	3dpl-3	3dpl-4	14dpl-1	14dpl-2	14dpl-3	14dpl-4
ENSDARG00000000018	nrf1	Turquoise (M1)	9.50719	9.68024	9.50435	9.78339	9.63749	10.1772	10.1512	10.4716	10.1468	10.3575	9.56372	9.60651	9.61893	9.61905	9.71258	9.64418	9.63862	9.72173
ENSDARG00000000019	ube2h	Turquoise (M1)	11.4945	11.3614	11.4873	11.5165	11.4853	11.0936	10.8617	11.2106	11.4019	10.7751	11.3109	11.3921	11.3701	11.5348	11.4503	11.2948	11.5009	11.2845
ENSDARG00000000069	dap	Turquoise (M1)	9.2037	9.34345	9.33787	9.32065	9.32621	10.3056	10.5409	10.2032	10.0127	10.5814	9.77943	9.47703	9.50908	9.13856	9.24156	9.38039	9.39145	9.32002
ENSDARG00000000086	itsn1	Turquoise (M1)	12.5195	12.6423	12.6897	12.6584	12.6205	10.5789	10.5875	11.024	11.1993	10.2432	12.3727	12.441	12.5221	12.5494	12.5387	12.645	12.6587	12.6812
ENSDARG00000000103	myh10	Turquoise (M1)	12.6786	12.7881	12.8584	12.8592	12.828	12.0936	12.1339	12.5617	12.5138	12.0464	12.6562	12.6396	12.7041	12.7619	12.7783	12.6293	12.804	12.6847
ENSDARG00000000142	tmem267	Turquoise (M1)	9.5858	9.59037	9.77001	9.67138	9.68769	7.96048	8.02101	8.08656	8.37877	7.47181	9.13388	9.45428	9.47185	9.41521	9.52604	9.47304	9.62749	9.62507
ENSDARG00000000189	sema6e	Turquoise (M1)	11.5024	11.7012	11.7235	11.8256	11.6922	10.716	10.3009	10.7042	10.7767	10.8346	11.143	11.094	11.2257	11.2599	11.5569	11.6901	11.534	11.5851
ENSDARG00000000241	slc40a1	Turquoise (M1)	10.9085	10.4039	10.7293	10.6377	10.6816	9.85596	9.31178	10.0994	9.76697	9.50369	10.1916	10.6732	10.3552	10.4109	10.415	10.1831	10.5526	10.3459
ENSDARG00000000370	triob	Turquoise (M1)	13.9317	13.9063	14.0297	13.7292	13.9165	12.0191	12.2356	12.5778	12.6386	11.6628	12.978	13.6756	13.8047	13.6776	13.7982	13.7013	14.0004	13.7804
ENSDARG00000000472	cntn2	Turquoise (M1)	11.1454	11.2591	11.4386	11.1563	11.2571	8.55281	8.86468	9.18092	9.15055	8.06787	10.307	11.1866	11.1864	11.1219	11.1696	11.0575	11.3719	10.9575
ENSDARG00000000540	asdurf	Turquoise (M1)	9.12773	9.21108	8.93013	9.16685	9.12804	9.55847	9.11617	9.36535	9.43964	9.52285	9.12709	9.24581	9.14574	9.0411	9.27414	9.11444	9.11168	9.06439
ENSDARG00000000760	znf511	Turquoise (M1)	6.99838	6.73507	6.70281	6.5253	6.7597	7.37725	7.43912	7.30756	7.03463	7.38137	6.7222	6.72265	6.43901	6.861	6.91911	6.83463	6.87878	6.64075
ENSDARG00000000779	scfd1	Turquoise (M1)	10.3994	10.3243	10.4671	10.427	10.4134	10.8027	10.4471	10.5561	10.6675	10.693	10.3308	10.3108	10.1865	10.3199	10.1618	10.2129	10.2435	10.264
ENSDARG00000000935	unk	Turquoise (M1)	9.24493	9.29583	9.2947	9.19069	9.25605	8.54576	8.42468	8.60169	8.78536	8.0835	8.93067	9.21489	9.20428	9.17044	9.37861	9.37919	9.31029	9.29928
ENSDARG00000000966	ncor2	Turquoise (M1)	13.2659	13.4257	13.4152	13.3481	13.371	12.7757	13.0075	13.0729	13.0621	12.8491	13.0546	13.2417	13.3147	13.3036	13.2615	13.3695	13.5302	13.4025
ENSDARG00000001015	znf384l	Turquoise (M1)	9.91528	10.2822	10.3445	10.113	10.1781	9.36812	9.73073	9.72881	9.26311	9.33615	9.85387	10.1621	9.91887	10.1071	10.2478	10.3184	10.3192	10.2081
ENSDARG00000001127	slc17a6a	Turquoise (M1)	13.9384	13.9699	14.0739	13.8559	13.9852	11.7935	12.0466	12.233	12.3561	11.2682	13.0626	13.4747	13.9245	13.6758	13.6913	13.6368	13.8384	13.7104
ENSDARG00000001210	arl14ep	Turquoise (M1)	7.77842	7.64866	7.86775	7.91535	7.83483	8.52081	8.75307	8.53798	8.20057	8.58904	8.1037	8.19772	7.85574	8.03863	8.17146	7.89932	7.93985	7.86909
ENSDARG00000001220	mycbp2	Turquoise (M1)	14.8747	14.9686	15.0544	14.8384	14.9321	13.8538	14.2363	14.382	14.3471	13.7716	14.5698	14.7614	14.9128	14.9261	14.8993	14.8299	15.1298	14.9264
ENSDARG00000001234	map4k2	Turquoise (M1)	7.68875	7.79373	7.52833	7.94382	7.74609	9.00466	8.81977	8.09151	8.1583	8.59268	8.04231	7.65984	7.38069	7.60567	7.65236	7.70935	7.77395	7.29261
ENSDARG00000001241	puf60b	Turquoise (M1)	10.8502	10.8608	10.9067	10.8667	10.8999	11.4745	11.5785	11.2032	11.3188	11.6208	10.7887	10.7826	10.7067	10.7831	10.7593	10.7336	10.7679	10.7111
ENSDARG00000001249	pcgf1	Turquoise (M1)	7.42502	7.09481	7.25549	7.46204	7.31209	7.97107	7.92699	7.58694	7.41929	8.03073	7.13507	7.40379	7.60189	7.29124	7.29262	7.49001	7.29568	7.47191
ENSDARG00000001559	csmd2	Turquoise (M1)	13.7347	13.9076	13.868	13.8677	13.7769	11.5923	12.005	12.1412	12.1549	11.2573	13.0612	13.2912	13.7017	13.6221	13.926	13.843	14.0089	13.8305
ENSDARG00000001578	echs1	Turquoise (M1)	9.15461	9.08506	8.94417	9.04784	9.09268	9.66135	9.70805	9.34483	9.41798	9.6796	9.19354	9.09548	9.14574	9.13856	8.90951	8.94515	8.81077	8.81314
ENSDARG00000001676	gpm6bb	Turquoise (M1)	12.169	11.7716	12.106	12.0522	12.0404	9.4627	9.3461	9.93216	9.77474	8.97061	11.8763	12.402	12.3715	12.2912	12.4437	12.4828	12.4737	12.5994
ENSDARG00000001754	noc2l	Turquoise (M1)	8.64458	8.35173	8.5103	8.12865	8.42063	8.96825	9.71682	9.30079	9.8054	10.0508	9.29588	8.35382	8.86332	8.63268	8.26308	8.03678	8.84961	8.54424
ENSDARG00000001769	ptpra	Turquoise (M1)	10.9882	10.924	11.0083	10.9335	10.9649	9.40359	9.55219	9.6084	10.0008	8.84825	11.0928	11.0227	10.9202	10.9624	10.8534	11.1396	11.0498	11.0619
ENSDARG00000001776	stim2b	Turquoise (M1)	9.02948	8.83803	8.86665	8.12865	8.68905	7.88963	7.75277	8.05142	7.82721	7.37285	8.46176	8.82756	8.71674	8.82383	8.7793	8.02761	8.89365	8.55304
ENSDARG00000001781	tspan11	Turquoise (M1)	9.0222	8.37488	8.33354	7.834	8.41587	7.05416	6.89087	7.15351	6.84271	6.36312	8.02288	8.07874	8.65155	8.29217	8.37131	8.15658	8.92126	8.13895
ENSDARG00000001788	atp5po	Turquoise (M1)	11.1184	11.0491	11.2391	11.1729	11.1736	12.2648	12.2075	12.0599	12.0278	12.6983	11.5224	11.2326	11.02	11.2678	11.1426	10.8774	10.8954	10.8724
ENSDARG00000001817	zmp:0000000521	Turquoise (M1)	8.89243	9.33406	9.29251	9.28509	9.154	6.35922	6.29597	6.62316	6.79339	5.99378	8.55245	8.76912	9.16797	9.12109	9.03929	9.18327	9.10634	9.05514
ENSDARG00000001857	aff4	Turquoise (M1)	10.8665	10.8444	10.9636	10.78	10.8497	9.02253	9.37298	9.43103	9.62639	8.67389	10.7032	10.947	10.8029	10.9847	10.9371	10.8871	10.9085	10.8689
ENSDARG00000001881	cacnb3a	Turquoise (M1)	10.5662	10.6096	10.7943	10.6815	10.6322	8.04812	8.38994	8.35279	8.8545	7.85959	9.71608	10.1761	10.3082	10.3209	10.2176	10.3741	10.5219	10.4245
ENSDARG00000001888	ppm1ba	Turquoise (M1)	11.809	11.7906	11.8795	11.8289	11.8304	10.5173	10.2045	10.6163	10.7231	9.93975	11.1215	11.4604	11.5645	11.6082	11.5973	11.5236	11.7338	11.4611
ENSDARG00000001898	manea	Turquoise (M1)	8.08951	8.01671	8.19917	8.25879	8.15464	8.75577	8.544	8.62573	8.64645	8.81752	8.17141	8.0225	8.08162	8.25138	8.26308	7.99346	8.13649	8.02314
ENSDARG00000001929	pink1	Turquoise (M1)	9.57838	9.68579	9.52877	9.65648	9.66381	8.75577	8.21236	8.88942	8.66665	8.19318	8.89116	9.23146	9.48764	9.25521	9.40291	9.40058	9.46828	9.30449
ENSDARG00000001937	LO018422.1	Turquoise (M1)	5.17407	4.76265	4.89714	5.46137	5.0344	5.87327	5.60108	5.27263	5.47814	6.27072	4.79455	4.85994	4.74046	5.14793	5.00326	4.95218	4.92193	4.78628
ENSDARG00000001940	dnajc1	Turquoise (M1)	9.71552	9.58245	9.78568	9.5173	9.67779	10.6843	11.1853	10.3514	10.5611	11.1413	10.3436	9.89866	9.65609	9.74648	9.53584	9.57062	9.55889	9.46206
ENSDARG00000001993	myhb	Turquoise (M1)	5.77878	5.47127	5.41085	5.36297	5.5134	8.10689	8.77677	7.5147	7.62059	8.56332	6.35553	6.14321	5.20368	5.24767	5.39077	5.36698	5.70197	5.03884
ENSDARG00000001999	adamts18	Turquoise (M1)	6.83826	6.79258	6.72974	6.4242	6.69653	5.52958	5.87939	6.17544	5.81822	5.66703	6.49412	6.64831	6.71397	6.90935	6.99358	7.04033	7.05852	7.40486
ENSDARG00000002020	rictorb	Turquoise (M1)	10.9807	11.026	11.0582	11.0953	11.0471	10.1496	10.3968	10.4009	10.4559	9.80696	10.7406	10.8518	10.8752	10.9998	10.9682	10.9688	11.1281	11.0214
ENSDARG00000002026	qkib	Turquoise (M1)	10.7315	10.4708	10.7147	10.3876	10.5401	8.83881	8.86784	9.13864	9.50462	8.47935	11.0841	10.9457	10.7886	10.8804	10.9573	11.0687	10.8411	11.0511
ENSDARG00000002071	adss	Turquoise (M1)	10.2749	10.4306	10.2528	10.4357	10.3674	8.49175	8.49174	8.95318	9.13855	8.12939	9.41204	9.78543	10.0523	10.0983	9.92322	10.069	9.98203	9.85733
ENSDARG00000002131	celf2	Turquoise (M1)	13.8924	13.9082	14.1184	13.8278	13.9466	12.1454	12.1891	12.5506	12.6358	11.642	13.0864	13.5481	13.7487	13.7368	13.7453	13.9189	13.9891	14.0824
ENSDARG00000002167	cacnb1	Turquoise (M1)	11.9881	12.0221	12.2176	12.1224	12.0894	10.5298	10.6828	10.864	11.3452	10.2421	11.4482	11.4302	11.8989	11.7641	11.6713	11.8798	11.8476	11.7358
ENSDARG00000002190	chmp2bb	Turquoise (M1)	9.4268	9.30789	9.29251	9.17584	9.32621	10.623	10.6355	10.0508	10.4712	10.6448	9.81643	9.54323	9.50327	9.44157	9.43469	9.11444	9.4662	9.14798
ENSDARG00000002204	hspb11	Turquoise (M1)	4.5503	4.76265	4.73353	4.16044	4.67012	6.35922	6.89087	6.7824	7.79069	8.5143	4.86801	4.7873	4.82872	4.16044	4.81693	4.41364	4.50414	4.78628
ENSDARG00000002240	psmb6	Turquoise (M1)	9.06534	9.35279	9.43449	9.22285	9.30578	10.528	10.5439	10.2067	10.3876	11.0799	10.197	9.55644	9.57525	9.58308	9.33155	9.17778	9.23166	9.24065
ENSDARG00000002264	mrpl41	Turquoise (M1)	7.4797	7.60208	7.43511	7.52018	7.55004	8.22653	8.15656	7.84391	8.00233	8.55961	7.67571	7.38145	7.46372	7.78219	7.81513	7.23028	7.36057	7.24946
ENSDARG00000002271	zfand5b	Turquoise (M1)	10.3363	10.2932	10.4466	10.5039	10.411	10.8159	11.2829	10.6509	10.9361	11.2441	10.2279	10.1469	10.0707	10.0157	10.0938	10.1421	10.1456	10.1485
ENSDARG00000002333	fam102bb	Turquoise (M1)	11.34	11.3025	11.2998	11.3009	11.3492	9.53734	9.29782	9.6887	9.53238	8.7956	10.6647	11.0351	11.1912	11.1609	11.2432	11.1565	11.3769	12.0711
ENSDARG00000002355	shpk	Turquoise (M1)	6.49215	6.76412	6.80748	6.61929	6.68027	6.09887	5.9332	5.86242	6.36927	5.75762	6.95967	6.90313	6.78138	7.03421	6.77399	6.86995	6.95349	6.72329
ENSDARG00000002365	cers5	Turquoise (M1)	8.75419	8.66124	8.59114	8.69015	8.69299	9.65483	9.78176	9.56473	9.33424	10.2921	9.3159	8.89936	8.7499	8.80519	8.7793	8.67341	8.55267	8.93586
ENSDARG00000002377	mief2	Turquoise (M1)	7.92685	7.9	8.08179	7.80322	7.93183	7.17959	7.02372	7.23717	7.00264	7.23851	7.72478	7.64746	7.68015	7.44509	7.64325	7.84807	7.73276	7.6722
ENSDARG00000002401	gale	Turquoise (M1)	6.65696	6.38496	6.54429	6.5253	6.54262	8.14478	8.46279	7.83211	8.01292	8.51813	7.67571	7.15386	6.76816	6.64849	6.73955	6.49508	6.7585	6.84576
ENSDARG00000002411	pde4cb	Turquoise (M1)	8.34487	8.16239	8.55129	8.76757	8.40146	7.61299	7.9209	8.20546	8.14393	7.44771	8.3992	7.98374	8.8265	8.6812	8.99376	8.09355	8.18804	8.6005
ENSDARG00000002445	prdm1a	Turquoise (M1)	6.30403	6.36576	6.51335	6.11776	6.32672	7.77326	7.38678	6.49008	6.99181	7.31175	6.92815	6.33397	6.17709	5.78466	5.98563	5.88424	6.19386	6.37841
ENSDARG00000002463	arhgef37	Turquoise (M1)	9.61511	9.78049	9.89662	9.63925	9.70535	8.15873	8.44174	8.47509	8.89786	7.91894	8.94875	9.42756	9.53402	9.5849	9.68862	9.56642	9.77925	9.4783
ENSDARG00000002487	noc3l	Turquoise (M1)	8.04696	8.46392	8.37567	8.37286	8.33228	8.96033	9.20114	8.79573	9.09452	9.2094	8.89915	8.63216	8.34343	8.27419	8.38224	8.32559	8.36411	8.27832
ENSDARG00000002552	mapkapk2a	Turquoise (M1)	9.8157	9.40758	9.43449	9.58857	9.56413	10.3222	10.3792	10.2635	10.1985	10.3913	10.2716	9.56953	9.59179	9.59397	9.38404	9.49751	9.41752	9.40982
ENSDARG00000002564	syngr1a	Turquoise (M1)	11.5231	11.4175	11.5176	11.6557	11.5621	9.75738	9.98119	10.1236	10.1623	9.32309	10.7377	10.9743	11.307	11.2305	11.333	11.0481	11.2642	11.0379
ENSDARG00000002571	tmod2	Turquoise (M1)	10.1866	10.1002	10.2	10.2652	10.1767	8.22653	8.5161	8.41327	8.78536	7.95341	10.5578	10.2912	10.3379	10.3693	10.2492	10.0428	10.2215	10.1899
ENSDARG00000002587	dpysl3	Turquoise (M1)	13.1117	13.3388	13.171	13.2848	13.2438	12.7587	12.5008	12.986	12.8878	12.6915	13.3523	13.0108	13.3199	13.2366	13.3889	13.5575	13.4927	13.8026
ENSDARG00000002600	pcsk1	Turquoise (M1)	12.8174	12.8443	13.1767	13.0012	12.9813	10.2165	10.719	10.7848	11.3994	10.257	12.5445	12.262	12.8525	12.6758	12.5664	12.7368	12.639	12.4148
ENSDARG00000002609	rnf145a	Turquoise (M1)	10.9797	10.8118	10.9732	11.0357	10.9632	10.435	10.0904	10.5939	10.5293	10.6587	11.1272	10.8498	10.8616	10.8121	10.9591	11.0627	11.0636	11.0627
ENSDARG00000002690	rabif	Turquoise (M1)	8.33313	7.20361	6.928	7.7396	7.55004	8.76793	9.19613	8.46751	8.58406	8.47935	8.07097	7.40379	7.28333	7.19788	7.73179	7.66653	7.50673	7.87615
ENSDARG00000002707	her11	Turquoise (M1)	4.83168	4.76265	4.73353	4.80149	4.78307	5.42378	5.49048	5.57478	5.44122	5.86837	4.4794	5.18641	4.49681	4.82578	4.81693	4.66491	4.16044	4.52365
ENSDARG00000002731	sdc2	Turquoise (M1)	9.58333	9.29825	9.59786	9.54068	9.52931	8.63148	8.87099	8.81078	8.96735	8.09896	9.61146	9.49086	9.54915	9.44157	9.41358	9.51614	9.37159	9.56987
ENSDARG00000002754	pdcd2l	Turquoise (M1)	7.22145	7.31428	7.40261	7.21395	7.31209	7.68575	7.93909	7.28157	7.35369	7.88957	7.29905	7.42578	7.13864	7.08745	6.91911	7.21404	7.1666	7.2162
ENSDARG00000002760	gdf5	Turquoise (M1)	5.02199	5.2927	5.37081	5.25359	5.22308	4.48577	4.16044	4.4888	4.8164	4.16044	4.71069	5.64206	5.50166	5.33763	5.74587	5.41341	5.27513	5.56143
ENSDARG00000002779	pdx1	Turquoise (M1)	5.30345	5.24239	5.23972	4.98364	5.10212	6.71228	6.08174	5.81034	6.01498	6.04055	5.10246	5.18641	4.82872	5.14793	5.58279	4.8253	5.05742	4.96431
ENSDARG00000002790	ap2m1b	Turquoise (M1)	11.7314	11.8106	11.9201	11.8857	11.87	12.305	12.2962	12.3293	12.4169	12.463	12.3229	11.7936	11.8266	11.8373	11.7799	11.6478	11.6598	11.7257
ENSDARG00000002816	rasgrf2b	Turquoise (M1)	12.5432	12.7627	12.7155	12.8701	12.6839	9.41329	9.41454	10.0684	10.0464	9.04145	11.2283	11.7104	12.1402	12.3759	12.0165	12.2155	12.3728	12.3038
ENSDARG00000002830	trmt2a	Turquoise (M1)	7.55286	7.74462	7.63684	7.53904	7.63504	8.31635	8.79014	8.25039	8.21896	8.28158	7.8843	7.82275	7.64511	7.64136	7.81513	7.63859	7.79411	7.57124
ENSDARG00000002877	reps1	Turquoise (M1)	10.4217	10.4761	10.4406	10.4567	10.4581	10.1565	9.93986	10.1416	10.3559	9.93117	10.4969	10.4561	10.3924	10.2978	10.4216	10.3807	10.3878	10.3992
ENSDARG00000002880	vps50	Turquoise (M1)	9.96356	10.0891	10.0588	9.97742	10.0257	9.41715	9.27663	9.27933	9.52687	8.73109	9.83319	9.78122	9.80375	9.87402	9.90065	9.97792	10.0307	9.97147
ENSDARG00000002909	tjp3	Turquoise (M1)	4.16044	4.85417	5.02847	4.16044	4.67012	6.01352	6.56297	5.93652	5.7061	5.89451	5.43626	4.16044	4.74046	5.33763	5.00326	4.66491	4.75298	5.33551
ENSDARG00000002916	sec31b	Turquoise (M1)	10.445	10.73	10.7645	10.5437	10.6105	9.17633	9.3141	9.63397	9.62467	8.79245	10.674	10.5704	10.6872	10.5365	10.6246	10.6333	10.6064	10.7383
ENSDARG00000002947	abcd3b	Turquoise (M1)	9.4268	9.41205	9.20428	9.29887	9.34386	9.64498	9.8278	9.68707	9.86773	9.77056	9.19354	9.24581	9.44378	9.08036	9.36492	9.17778	9.23655	9.40497
ENSDARG00000002949	ppp6c	Turquoise (M1)	10.5321	10.4151	10.5139	10.4943	10.5092	10.7901	10.9506	10.5596	10.6131	11.1628	10.6506	10.3039	10.4122	10.4201	10.4322	10.3059	10.3318	10.3357
ENSDARG00000002967	pdap1b	Turquoise (M1)	8.63027	8.62311	8.61242	8.37286	8.60363	9.64663	9.77673	9.22424	9.56679	10.0011	8.68166	8.67221	8.67246	8.53798	8.41986	8.45189	8.69108	8.42944
ENSDARG00000002994	itpkca	Turquoise (M1)	9.41296	9.5685	9.55095	9.47667	9.53152	9.12765	9.06488	8.88942	8.95646	9.04941	9.11343	9.32128	9.51295	9.47925	9.548	9.50081	9.57249	9.54587
ENSDARG00000003041	CABZ01111496.1	Turquoise (M1)	7.3797	7.81427	8.42864	7.51065	7.77629	6.44087	7.04656	6.75712	7.14602	6.04055	7.67571	7.62236	8.06586	7.84465	7.76571	7.92592	7.56279	7.89015
ENSDARG00000003046	sorbs2a	Turquoise (M1)	10.9675	11.0971	11.1929	11.2243	11.0745	9.64827	9.80989	9.90581	10.1055	9.05205	10.6948	10.8711	10.7176	11.05	11.1735	11.274	11.0505	11.224
ENSDARG00000003058	fgfr1op	Turquoise (M1)	9.37347	9.31268	9.31212	9.33141	9.34886	9.82287	9.59086	9.6424	9.80994	10.0228	9.24666	9.24988	9.25363	9.05693	9.32308	9.20775	9.32644	9.27823
ENSDARG00000003069	btbd7	Turquoise (M1)	9.09687	9.4754	9.71542	9.52201	9.41712	7.61976	7.89629	8.06659	8.17253	7.21003	9.51606	9.46307	9.30134	9.39252	9.68422	9.64119	9.62749	9.743
ENSDARG00000003084	spire2	Turquoise (M1)	9.91332	10.1479	10.0857	9.85598	9.99889	9.14639	9.18099	9.6084	9.72269	8.9367	9.82762	10.0252	10.0536	10.211	9.81472	10.1085	10.114	9.91297
ENSDARG00000003087	ubxn6	Turquoise (M1)	8.89243	9.04528	8.95808	8.90012	8.98109	8.19529	8.32245	8.42115	8.44662	7.71959	8.915	9.15099	8.91099	9.01702	8.93568	9.12448	9.05189	9.02702
ENSDARG00000003109	rcan1a	Turquoise (M1)	11.3473	11.1983	11.2905	11.2781	11.3132	10.5598	11.0216	10.4744	10.7415	11.0825	11.1474	11.2134	11.2008	11.0546	11.2236	11.1463	11.1861	11.3287
ENSDARG00000003132	apip	Turquoise (M1)	7.85457	7.86764	8.10204	7.91535	7.94516	8.90636	8.34983	8.70843	8.4388	8.9734	8.42159	8.19772	8.1579	7.84465	8.07357	8.13683	8.07207	7.96482
ENSDARG00000003151	skp1	Turquoise (M1)	11.9717	11.7572	11.9444	11.8031	11.8967	12.3269	12.4378	12.095	12.4914	12.6581	11.9406	11.8161	11.9051	12.0412	11.6089	11.5231	11.647	11.2931
ENSDARG00000003153	nudt21	Turquoise (M1)	8.99642	9.02497	9.0877	9.0248	9.05949	9.55847	9.87399	9.39757	9.3757	9.86516	9.3159	9.26203	9.1079	9.15826	9.10004	9.01157	8.97786	9.12164
ENSDARG00000003165	nr2f6b	Turquoise (M1)	7.84631	8.11912	8.312	7.9009	8.06598	8.87017	8.34983	9.00641	8.89786	8.86638	8.10832	8.26383	8.25366	8.04926	8.29815	8.11679	8.34154	8.35587
ENSDARG00000003205	ngly1	Turquoise (M1)	8.86419	8.83136	8.91595	9.13032	8.96162	9.31735	9.36408	9.10243	9.35304	9.37041	9.09268	9.07267	9.03449	9.0411	9.08342	8.68121	8.84	9.03332
ENSDARG00000003235	nup88	Turquoise (M1)	9.11067	9.16411	9.13498	9.1426	9.16255	9.56545	9.33247	9.43686	9.47822	9.7593	9.29386	9.0448	9.0291	9.13359	8.97946	8.98506	9.10099	9.13633
ENSDARG00000003250	pik3cd	Turquoise (M1)	11.3603	11.652	11.482	11.3165	11.4671	10.1623	10.7687	10.3899	10.6372	10.2932	10.6771	11.0463	11.2669	11.4208	11.3935	11.1977	11.4065	11.2706
ENSDARG00000003251	zbtb22b	Turquoise (M1)	9.04033	9.1956	9.39007	9.10857	9.17949	7.31161	7.18657	7.43859	7.62752	6.74786	8.93327	9.04246	8.93136	9.14598	9.12623	9.14293	9.33558	9.20764
ENSDARG00000003287	wdr12	Turquoise (M1)	8.7975	8.61147	8.57316	8.52154	8.64494	9.44011	9.17082	9.13147	9.28721	9.36192	8.89383	8.60058	8.55725	8.54923	8.53695	8.39844	8.52091	8.31503
ENSDARG00000003290	dab1b	Turquoise (M1)	8.70498	8.96227	9.13008	8.91093	8.92187	6.92739	6.579	7.15351	7.32828	6.46605	8.44728	8.30365	8.65505	8.80206	8.93568	9.2358	8.96613	8.89149
ENSDARG00000003293	sox9a	Turquoise (M1)	10.2977	10.5172	10.5502	10.1192	10.3954	9.11344	8.94754	9.46374	9.52503	8.42732	10.2173	10.9514	10.3204	10.7815	10.5395	10.6473	10.5108	10.7659
ENSDARG00000003308	emc2	Turquoise (M1)	10.152	10.1639	10.2392	10.2312	10.2264	10.5316	10.4628	10.6534	10.7359	10.8739	10.5629	10.2348	10.1159	10.3155	10.2313	10.0413	10.114	10.0848
ENSDARG00000003403	tenm1	Turquoise (M1)	14.3045	14.4051	14.5675	14.3862	14.4077	13.2087	13.5004	13.5248	13.7235	12.8167	13.6173	14.0331	14.027	14.0957	14.3507	14.1428	14.4517	14.3579
ENSDARG00000003421	igf2bp2a	Turquoise (M1)	9.21651	9.36207	9.47178	9.08012	9.26137	8.20428	8.33163	8.60515	8.10982	7.59381	8.85875	9.60174	9.15071	9.33959	9.32025	9.12162	9.27508	9.15088
ENSDARG00000003449	pde10a	Turquoise (M1)	10.2703	10.3606	10.2392	10.3094	10.2928	8.32874	8.13046	8.8979	8.82485	8.32162	9.34542	9.8187	9.9619	9.77865	9.90821	9.99051	9.93018	9.80129
ENSDARG00000003462	fech	Turquoise (M1)	7.76094	7.91275	8.20853	8.29783	8.02892	6.54735	6.51369	6.76982	6.57604	6.10758	8.3338	9.00197	8.70326	8.64671	8.53695	8.25147	8.48019	8.24609
ENSDARG00000003517	impa1	Turquoise (M1)	8.54639	8.48535	8.46421	8.66481	8.56541	9.46457	9.34384	9.13386	9.10196	9.69994	8.9767	8.63216	8.2629	8.72483	8.68102	8.31057	8.32323	8.37586
ENSDARG00000003519	aprt	Turquoise (M1)	7.98817	7.81427	7.71146	7.97174	7.89794	8.54928	9.46953	8.4976	8.56264	8.59268	8.38408	7.67822	7.66624	8.0117	8.09369	7.69004	7.8783	7.85488
ENSDARG00000003527	mak16	Turquoise (M1)	7.67012	7.84786	7.41081	7.71499	7.6837	9.48679	9.53445	9.022	9.20678	9.97495	8.21911	8.01291	7.7932	7.76291	7.84715	7.76204	8.10464	7.81136
ENSDARG00000003531	tcea1	Turquoise (M1)	9.60541	9.44953	9.55461	9.53137	9.56198	9.96547	10.0452	9.88039	9.95507	10.2593	9.91156	9.67472	9.65784	9.58308	9.70391	9.68349	9.62935	9.8732
ENSDARG00000003544	adarb1b	Turquoise (M1)	10.2092	10.4084	10.5693	10.3417	10.3362	8.35319	8.43324	8.70521	8.83678	7.91894	9.73106	9.69278	9.95624	10.1071	9.97816	10.0489	10.1624	10.1514
ENSDARG00000003564	dohh	Turquoise (M1)	8.44644	8.31868	8.36734	8.50259	8.43955	9.37607	9.41454	8.94774	9.26311	9.59161	8.89915	8.59418	8.52312	8.34482	8.46168	8.13398	8.38191	8.15641
ENSDARG00000003573	dctn5	Turquoise (M1)	9.1141	9.02789	8.95808	9.30435	9.1222	9.69831	9.92934	9.56473	9.69839	10.2246	9.32186	8.96527	9.00734	9.1286	8.97946	8.79877	8.95133	9.00477
ENSDARG00000003584	pla2g7	Turquoise (M1)	7.98817	7.9379	7.91435	8.32508	8.05373	8.53155	8.74623	8.17316	8.53359	8.53335	8.39166	8.13284	7.76087	7.74336	7.86289	7.6142	7.77395	7.91091
ENSDARG00000003592	surf1	Turquoise (M1)	7.84631	7.96873	7.63684	7.87895	7.86322	8.70291	8.39433	8.28965	8.32886	8.95939	7.9372	8.01291	8.01752	8.08068	7.79063	7.91268	7.90941	7.95153
ENSDARG00000003616	arih1	Turquoise (M1)	9.89551	9.99687	9.91098	9.92688	9.9553	9.47572	9.62106	9.70809	9.88074	9.0678	9.92465	9.93955	9.89242	9.99666	10.0241	9.93053	10.018	10.0387
ENSDARG00000003631	clockb	Turquoise (M1)	10.0285	10.0638	9.94067	10.3707	10.0987	8.90636	9.24545	9.1146	9.39397	8.63209	9.62276	9.73114	9.59544	9.9295	10.0345	9.85595	10.152	10.0055
ENSDARG00000003675	cryl1	Turquoise (M1)	7.42502	7.41687	7.459	7.3701	7.45025	7.73018	7.89629	7.873	7.26715	7.86563	7.65053	7.46875	7.25556	7.27305	7.07798	7.18098	7.22766	7.1354
ENSDARG00000003681	eif5	Turquoise (M1)	11.8756	11.8009	11.9023	11.7368	11.8613	12.4507	12.4105	12.1822	12.4524	12.825	12.1642	11.9213	12.001	11.8502	11.7963	11.6712	11.947	11.6853
ENSDARG00000003684	obsl1a	Turquoise (M1)	6.171	5.72527	6.17637	5.71127	5.95872	6.59051	7.38678	6.65103	7.72765	7.95341	6.08571	5.84934	6.09131	6.4305	5.85457	6.27557	5.8235	5.93812
ENSDARG00000003693	hars	Turquoise (M1)	9.57589	9.64268	9.49675	9.76366	9.6598	10.6222	10.672	10.2414	10.614	10.8739	10.2737	9.72968	9.64205	9.79603	9.70391	9.57585	9.62563	9.56987
ENSDARG00000003749	polb	Turquoise (M1)	8.24812	7.97482	7.98151	8.05886	8.08416	8.40088	8.37225	8.43677	8.47365	8.70446	7.92154	8.02727	8.0972	7.95062	8.22713	8.14815	8.06657	8.12127
ENSDARG00000003757	cnpy1	Turquoise (M1)	7.28444	7.12835	7.27362	7.34882	7.25927	9.3581	9.42528	9.02974	8.88355	9.17831	8.07097	7.65984	7.53449	7.43697	7.46849	7.25693	7.13505	7.51792
ENSDARG00000003795	idh2	Turquoise (M1)	11.3045	11.2609	11.4045	11.1087	11.3003	12.0827	11.798	11.9414	11.9551	12.512	11.6823	11.132	11.397	11.1157	11.1418	11.1435	10.999	11.1693
ENSDARG00000003808	aqp3a	Turquoise (M1)	4.83168	4.85417	4.73353	4.53257	4.78307	5.84823	6.70082	5.35711	6.53109	6.54611	4.71069	4.92525	4.74046	5.66549	5.4422	4.98981	4.92193	5.10688
ENSDARG00000003822	ankrd16	Turquoise (M1)	7.30887	7.62556	7.84387	7.1781	7.50555	6.69928	7.05785	7.09482	7.08637	6.95848	7.28266	7.56422	7.31055	7.76291	7.23283	7.57681	7.60913	7.50884
ENSDARG00000003827	snapc1b	Turquoise (M1)	7.6417	7.5782	7.58724	7.71499	7.64327	8.11646	7.8198	8.14487	8.07488	8.41504	7.64416	7.70235	7.68015	7.52383	7.76571	7.77308	7.78742	7.78909
ENSDARG00000003835	stom	Turquoise (M1)	10.737	10.8827	10.528	11.1878	10.8585	9.89939	9.81479	10.1296	9.51207	9.4018	10.0755	10.5865	10.5954	10.6573	11.0144	10.5093	10.6382	10.8583
ENSDARG00000003841	usb1	Turquoise (M1)	7.68875	7.69375	7.86182	7.52018	7.69956	8.23093	7.73202	8.2636	8.23712	8.46354	7.61189	7.62868	7.65219	7.54662	7.79063	7.63455	7.58615	7.81136
ENSDARG00000003846	mrpl21	Turquoise (M1)	7.89518	7.64866	7.79487	7.68995	7.78374	8.57721	8.43324	8.48263	8.5114	8.99553	7.97311	7.72019	7.82481	7.91616	7.96119	7.54703	7.60913	7.75119
ENSDARG00000003860	cbx3a	Turquoise (M1)	10.0608	9.8823	9.99154	9.96711	10.0084	10.7668	10.886	10.5272	10.6131	11.1506	10.1687	9.95584	10.0967	9.9151	9.91948	9.95321	9.96447	9.95168
ENSDARG00000003867	cdk20	Turquoise (M1)	10.1045	9.96223	9.73976	10.0509	9.99091	8.62146	8.69027	8.56665	9.34888	8.70109	9.52469	9.67321	9.91304	9.69517	9.81874	9.6796	10.0123	9.6209
ENSDARG00000003910	med13b	Turquoise (M1)	11.6388	11.6262	11.835	11.6864	11.7	10.9498	11.1764	11.4903	11.3999	10.7687	11.1963	11.6099	11.5234	11.6069	11.6444	11.627	11.8149	11.7592
ENSDARG00000003920	setb	Turquoise (M1)	11.5024	11.4489	11.3513	11.4999	11.4819	11.9641	12.1796	11.7702	12.0634	12.3088	11.768	11.4847	11.5523	11.5761	11.4721	11.3917	11.4544	11.6126
ENSDARG00000003941	rrs1	Turquoise (M1)	7.82964	7.75882	7.6507	7.6472	7.7537	9.13001	9.32331	8.74022	9.17189	9.59704	8.63456	8.06024	7.84345	8.00626	7.47878	7.5384	7.58615	7.36507
ENSDARG00000003952	pfn2	Turquoise (M1)	12.1268	12.3094	12.2371	12.2269	12.2395	12.9391	13.2644	12.4776	12.8627	12.9538	12.8227	12.3633	12.2906	12.2078	12.2763	12.1052	12.3753	12.2191
ENSDARG00000003971	isl2a	Turquoise (M1)	4.83168	4.5098	4.73353	4.53257	4.67012	5.38594	5.32189	4.95637	5.08045	4.9727	4.71069	4.7873	4.49681	4.90271	4.81693	4.91247	4.75298	4.78628
ENSDARG00000003973	chordc1a	Turquoise (M1)	8.12404	8.01671	7.62285	8.0458	7.97796	6.65951	6.81262	6.63717	6.89033	6.28973	7.65686	7.82275	7.82481	7.56905	7.83123	7.80571	7.63174	7.69636
ENSDARG00000003989	crhr1	Turquoise (M1)	11.4238	11.5007	11.5186	11.6249	11.4642	9.23441	9.28373	9.51236	9.60389	8.61789	10.5426	10.9369	11.1972	11.2276	11.4606	11.515	11.5654	11.4441
ENSDARG00000004017	spag1a	Turquoise (M1)	8.22923	8.44218	8.37981	8.60832	8.43484	9.48679	9.21853	8.84334	9.31091	9.69319	8.74512	8.30757	8.4114	8.33184	8.07357	8.13683	8.01036	7.86909
ENSDARG00000004074	bach2b	Turquoise (M1)	10.0715	10.1705	10.2163	9.99614	10.0748	9.12529	9.49422	9.31773	9.73389	8.64266	9.64191	9.58572	9.93047	10.1967	10.354	10.6202	10.5358	10.6632
ENSDARG00000004151	rab23	Turquoise (M1)	9.55588	9.84144	9.89373	9.48874	9.69557	8.20876	8.68312	8.1257	8.63623	8.10408	9.14735	9.01639	9.31247	9.41521	9.36492	9.10723	9.32644	9.13047
ENSDARG00000004154	orai1b	Turquoise (M1)	7.98817	7.88067	8.12695	7.7396	7.91837	6.79999	6.94067	6.99115	7.18442	6.46605	7.94755	7.91843	8.03921	7.6343	8.25715	7.73217	7.84651	7.87615
ENSDARG00000004158	tmem63c	Turquoise (M1)	11.4058	11.3299	11.4181	11.3579	11.3958	10.1986	9.63593	10.3483	10.2507	9.83022	10.7295	11.0089	11.0979	11.0819	11.0048	11.3115	11.3857	11.3107
ENSDARG00000004160	reep3b	Turquoise (M1)	8.81868	8.731	8.79095	8.92878	8.8282	9.54618	9.68322	9.5197	9.18128	9.89487	8.65043	8.7491	8.51155	8.4725	8.70731	8.72901	8.89983	8.75335
ENSDARG00000004177	fam169ab	Turquoise (M1)	8.52075	8.35639	8.34631	8.5121	8.43955	7.08412	7.16592	7.29029	7.35369	6.60689	8.30195	8.35002	8.2397	8.2877	8.24522	8.25671	8.2764	8.07305
ENSDARG00000004184	nf1b	Turquoise (M1)	11.6919	11.9151	12.0099	11.8761	11.8393	10.3677	11.0181	11.0703	10.8141	10.3109	11.6357	11.7569	11.5396	11.7793	11.9443	11.7434	11.9615	11.9437
ENSDARG00000004189	cbx1a	Turquoise (M1)	10.4409	10.4825	10.3821	10.4847	10.4878	10.1703	9.8677	10.2314	10.0956	10.1216	10.229	10.4159	10.4838	10.5459	10.644	10.6218	10.7913	10.6844
ENSDARG00000004227	pde3a	Turquoise (M1)	7.3797	8.01671	8.05088	7.59415	7.7537	6.93841	7.06904	6.65103	7.48962	6.48245	7.932	7.64746	7.60189	7.76291	7.86289	8.26453	7.58615	7.86909
ENSDARG00000004256	wnt11	Turquoise (M1)	5.10153	4.5098	4.82077	4.80149	4.78307	6.50275	5.56546	5.3158	6.24285	6.60689	4.71069	4.70437	4.74046	5.29372	4.81693	5.18413	5.27513	5.03884
ENSDARG00000004261	tmed9	Turquoise (M1)	9.8241	9.75783	9.79964	9.80285	9.82321	11.0693	11.0717	10.572	10.8637	11.3046	10.7815	10.2099	9.98711	9.98016	9.78832	9.74701	9.88887	9.85733
ENSDARG00000004282	zgc:77375	Turquoise (M1)	10.3509	10.594	10.6782	10.2254	10.4627	8.28279	8.69027	8.81973	9.0491	8.01993	10.5056	10.5029	10.7301	10.3209	10.4177	10.2689	10.3352	10.1014
ENSDARG00000004291	hecw1b	Turquoise (M1)	11.7326	11.8953	11.9148	11.8141	11.8397	10.0058	10.2974	10.5227	10.6389	9.69657	11.07	11.6567	11.6581	11.7876	11.7644	11.7016	11.8383	11.8515
ENSDARG00000004305	vangl1	Turquoise (M1)	9.05468	9.22387	9.11774	8.95687	9.09864	8.61474	8.60582	8.95588	8.8691	8.09896	9.15849	9.14444	9.09248	9.1607	9.41889	9.56852	9.39801	9.58065
ENSDARG00000004306	klhl18	Turquoise (M1)	8.57655	8.57997	8.60182	8.61716	8.61615	7.99722	8.28983	8.28534	8.41907	7.75915	8.80589	8.65386	8.52312	8.43659	8.65424	8.53606	8.57604	8.75716
ENSDARG00000004336	exoc4	Turquoise (M1)	11.0977	11.1422	11.2567	11.2974	11.2036	9.36612	9.18858	9.6084	9.76542	8.98451	10.8414	10.9413	11.0335	11.0806	11.1703	11.0238	11.1229	11.1148
ENSDARG00000004392	hdr	Turquoise (M1)	5.8893	5.58741	5.71567	6.60101	5.92987	6.89379	7.04656	7.70835	6.78077	7.36429	6.14441	6.44226	6.29585	5.66549	5.39077	5.98396	6.03468	5.78186
ENSDARG00000004402	elovl6	Turquoise (M1)	9.85923	9.86447	9.87774	9.87634	9.90696	10.1286	10.7164	10.2078	10.2585	10.9165	9.88635	9.78543	10.0092	9.77865	9.84656	9.74701	9.68763	9.76206
ENSDARG00000004427	dpy30	Turquoise (M1)	7.919	7.91908	7.84988	8.09735	7.97796	9.05513	8.49174	8.74336	8.72884	9.408	8.61527	8.14166	8.23031	8.13655	7.83921	7.94229	7.90941	7.86909
ENSDARG00000004436	fam92a1	Turquoise (M1)	6.9678	7.02521	6.89294	7.14132	7.02549	8.12122	8.06028	7.81422	7.86868	8.3563	7.21514	7.18872	6.89494	7.21706	7.47878	7.00915	6.90414	7.15896
ENSDARG00000004452	tardbpl	Turquoise (M1)	11.7486	11.7283	11.7805	11.7609	11.7841	12.0635	12.1913	12.1188	12.1875	12.228	11.7215	11.7462	11.7514	11.6322	11.7497	11.6971	11.6859	11.6808
ENSDARG00000004459	unc119.2	Turquoise (M1)	4.16044	5.0718	4.89714	4.80149	4.78307	9.26044	9.37298	8.68575	6.48458	8.60714	5.65807	4.85994	4.74046	5.53213	5.74587	4.59788	5.32222	4.78628
ENSDARG00000004470	prkcsh	Turquoise (M1)	10.0767	10.125	10.073	10.0942	10.1164	10.9624	11.1351	10.7595	11.1132	11.089	10.7295	10.4561	10.0051	10.053	10.0585	10.1491	10.1074	10.1163
ENSDARG00000004502	rcor3	Turquoise (M1)	9.04033	9.0738	9.41447	8.93938	9.10456	8.14478	8.28983	8.66602	8.52991	7.67889	8.65673	8.9174	9.19949	9.16558	9.08676	9.33172	9.23655	9.36562
ENSDARG00000004517	ppat	Turquoise (M1)	6.9678	6.52931	6.34682	6.63733	6.6132	7.9498	8.34076	7.55128	7.73408	8.16409	7.65053	6.84923	6.72772	6.57464	6.88816	6.71508	6.49744	6.31474
ENSDARG00000004525	zgc:63882	Turquoise (M1)	7.7253	7.39876	7.69149	7.51065	7.61007	8.74659	8.84561	8.24596	8.45051	9.18795	7.8843	7.66599	7.55732	7.37026	7.64325	7.44914	8.03874	7.4905
ENSDARG00000004527	pin4	Turquoise (M1)	7.78709	7.74462	7.67124	7.70669	7.7688	8.92277	8.77677	8.53435	8.52254	9.21176	8.3338	7.97389	7.81855	8.02792	8.04629	7.75091	7.82708	7.76647
ENSDARG00000004537	kmt2a	Turquoise (M1)	13.5933	13.6785	13.5985	13.7903	13.6491	12.2664	12.4599	12.6781	12.7263	11.8359	13.1637	13.604	13.3613	13.6007	13.4732	13.4304	13.6458	13.3992
ENSDARG00000004597	lrrc4ba	Turquoise (M1)	13.1424	13.1592	13.1659	13.1687	13.1109	11.2077	11.2645	11.3265	11.9022	11.2244	12.247	12.5873	12.8294	12.8872	12.9456	12.9793	13.0702	12.9313
ENSDARG00000004632	egln1b	Turquoise (M1)	8.28517	8.0343	7.93709	8.44913	8.20531	8.76793	8.28037	8.38537	8.21439	8.81752	8.26113	8.22702	8.14296	7.92774	8.12661	7.99973	7.9814	7.98453
ENSDARG00000004633	epn3b	Turquoise (M1)	8.71406	9.27388	9.39825	8.90373	9.07467	8.3122	8.72202	8.67592	9.23409	8.24502	8.78592	8.76912	9.22564	9.32005	9.07335	9.11444	9.23898	9.21597
ENSDARG00000004634	osbp	Turquoise (M1)	10.0573	10.3373	10.4921	10.091	10.2427	9.07238	9.07855	9.28795	9.58634	8.36909	10.6227	10.3596	10.2937	10.3469	10.0855	10.3849	10.3678	10.3459
ENSDARG00000004648	kctd16a	Turquoise (M1)	9.50719	9.56448	9.62599	9.74164	9.59603	7.26028	7.23689	7.55848	7.70163	6.88777	8.55245	8.98006	9.40895	9.2958	9.30886	9.20235	9.41321	9.43618
ENSDARG00000004721	mpp5b	Turquoise (M1)	8.01786	8.34237	7.71146	7.80322	7.98443	6.39249	6.579	5.75584	6.41993	6.56157	7.19774	6.89251	7.90977	7.92774	7.47878	7.68225	7.00115	7.43399
ENSDARG00000004735	hnrnpub	Turquoise (M1)	12.2432	12.1854	12.1709	12.1197	12.2131	12.3763	12.6017	12.3485	12.755	12.6693	12.1293	12.1319	12.1321	12.0349	12.1855	12.232	12.218	12.2831
ENSDARG00000004789	lrp1ba	Turquoise (M1)	11.326	11.6496	11.5832	11.3807	11.4404	9.64003	9.57744	10.2403	10.1717	9.50369	11.207	10.9768	11.0791	11.3418	11.2319	11.5171	11.2315	11.393
ENSDARG00000004796	mgrn1b	Turquoise (M1)	11.8497	11.9699	11.7605	11.923	11.8925	11.4308	11.356	11.3662	11.4828	11.3303	11.6831	11.662	11.8524	11.5456	11.7487	11.7855	11.8638	11.6763
ENSDARG00000004823	asz1	Turquoise (M1)	5.10153	4.76265	4.16044	4.80149	4.78307	5.38594	5.32189	6.13525	6.03748	6.39833	5.2842	4.92525	4.82872	4.7379	4.81693	4.95218	4.99273	4.52365
ENSDARG00000004843	foxp1a	Turquoise (M1)	9.80515	9.32933	9.59786	8.7636	9.38583	8.40478	8.42468	8.92303	8.73203	8.11426	8.83396	9.46307	9.27199	9.25749	9.47091	9.27879	10.0279	9.35561
ENSDARG00000004891	pex19	Turquoise (M1)	10.1486	10.1085	9.87041	10.1499	10.0913	10.5316	10.6018	10.3728	10.3128	10.6955	10.0338	9.99274	10.1609	10.0264	10.1665	9.77275	9.96152	9.76206
ENSDARG00000004925	immp2l	Turquoise (M1)	6.83826	7.09481	7.40261	7.07776	7.08771	8.1541	7.63847	7.63539	7.83321	8.05736	7.09796	6.97521	7.06564	6.41348	6.7909	6.82025	7.12437	7.43399
ENSDARG00000004930	lmo7a	Turquoise (M1)	9.06534	8.80777	8.78159	8.8523	8.88788	10.4081	10.518	9.93079	10.0944	10.1759	9.25291	9.50626	9.34318	9.31347	9.548	9.10867	9.02103	9.01116
ENSDARG00000004931	slc8a3	Turquoise (M1)	11.0609	11.1989	11.2443	11.0349	11.0858	8.84743	9.00883	9.27717	9.43769	8.40265	10.2279	10.3059	10.8938	10.7807	10.8767	11.0003	10.935	10.8915
ENSDARG00000004939	mtdhb	Turquoise (M1)	10.6394	10.5682	10.6664	10.4955	10.6363	9.78304	10.0014	10.1091	10.4616	9.50562	10.7054	10.4944	10.5331	10.4613	10.4925	10.5957	10.7128	10.5383
ENSDARG00000004948	bccip	Turquoise (M1)	9.79664	9.64268	9.73815	9.68193	9.7608	10.536	10.7398	10.2558	10.4007	10.9143	9.81643	9.69278	9.73595	9.67652	9.87772	9.44358	9.66967	9.68424
ENSDARG00000004956	zmat2	Turquoise (M1)	8.41894	8.43338	8.312	8.35711	8.42539	9.09185	9.18099	8.73707	8.82185	8.97896	8.37263	8.23116	8.3989	8.34051	8.38224	8.27747	8.49253	8.25151
ENSDARG00000005126	large1	Turquoise (M1)	10.4437	10.73	10.8294	10.5086	10.5853	8.36125	8.44174	8.80177	8.92047	7.90139	10.3801	10.5433	10.6587	10.4593	10.653	10.7341	10.8029	10.7507
ENSDARG00000005128	rnaseh2b	Turquoise (M1)	7.65123	7.64866	7.50559	7.80322	7.66767	8.30804	8.01531	8.27234	7.81514	8.43139	7.8843	7.8767	7.77389	7.47711	7.53904	7.4023	7.27658	7.56249
ENSDARG00000005134	psmd11b	Turquoise (M1)	9.96545	9.72226	9.79035	9.6924	9.81601	10.2558	10.521	10.3637	10.5403	10.6422	10.1532	10.0534	9.9477	9.87699	9.87579	9.86794	9.88576	9.978
ENSDARG00000005154	aspa	Turquoise (M1)	8.57157	8.24518	8.32496	8.23599	8.33228	6.76309	7.15548	7.13422	7.21254	6.34516	7.3392	8.45978	7.84345	8.11143	8.15241	8.04892	8.21314	7.95153
ENSDARG00000005163	efr3a	Turquoise (M1)	10.8127	10.9011	10.9649	10.9932	10.9319	10.0122	10.0171	10.283	10.2684	9.51139	10.8936	10.68	10.7782	10.7348	10.9185	10.7048	10.8791	10.7527
ENSDARG00000005220	pdcd6	Turquoise (M1)	9.22288	9.37358	9.13008	9.2458	9.26666	9.99289	10.034	9.56827	9.4416	10.0269	9.02617	9.12239	9.38596	9.10849	8.77101	8.67536	8.97786	8.50849
ENSDARG00000005236	srcap	Turquoise (M1)	13.3741	13.3241	13.3986	13.4315	13.3782	12.7561	13.2812	13.083	13.0347	12.7363	13.0469	13.3708	13.2486	13.3934	13.3324	13.2461	13.3775	13.3892
ENSDARG00000005251	rpe	Turquoise (M1)	8.19068	8.1355	8.19447	8.37286	8.24352	8.79195	9.06762	8.74649	8.55543	8.87834	8.59901	8.48423	7.92733	7.94493	8.66322	8.03678	8.11533	8.21311
ENSDARG00000005356	tyro3	Turquoise (M1)	8.86419	8.33766	8.63338	8.62594	8.57827	6.30768	6.70082	6.40997	6.56123	5.99378	8.85875	8.57805	8.56846	8.59699	8.89815	8.77346	8.6104	8.93586
ENSDARG00000005364	grin3ba	Turquoise (M1)	7.12821	7.78682	7.55809	7.77177	7.55004	6.30768	6.27608	6.27072	6.96989	6.34516	7.52439	7.1361	7.39769	7.49286	7.47878	7.48552	7.55491	7.6057
ENSDARG00000005394	dnmt3aa	Turquoise (M1)	11.1537	11.3151	11.329	11.1684	11.218	8.55982	8.99158	9.11702	9.38588	8.34339	11.1141	11.1781	11.4315	11.2746	11.4002	11.6947	11.5265	11.9044
ENSDARG00000005423	pgam1a	Turquoise (M1)	9.38486	9.54629	9.4205	9.45715	9.50039	10.7105	10.2463	10.4294	10.5201	10.8453	10.3562	9.49086	9.38596	9.44759	9.39216	9.10143	9.22675	9.21597
ENSDARG00000005425	wdfy1	Turquoise (M1)	9.77083	9.5725	10.0143	9.6924	9.77759	8.8842	8.81324	9.2332	9.14576	8.5143	9.91287	9.86588	9.85182	9.64546	9.76142	9.87898	9.8189	9.852
ENSDARG00000005448	mtfmt	Turquoise (M1)	7.67946	7.74462	7.51321	7.7396	7.6837	7.98159	7.95704	7.94597	7.80907	8.14437	7.79534	7.59682	7.70076	7.52383	7.86289	7.5078	7.53103	7.6057
ENSDARG00000005463	slc30a1a	Turquoise (M1)	10.1436	9.84806	10.117	9.75369	9.98129	10.511	10.7137	10.7242	10.3382	10.2775	9.75911	10.1793	10.0064	9.90202	9.88348	9.78455	9.79093	9.88368
ENSDARG00000005476	nav3	Turquoise (M1)	13.1185	13.2034	13.0957	13.0961	13.1235	12.2233	12.3805	12.7383	12.5715	12.1547	12.8895	12.5615	13.0572	13.0379	12.758	12.9376	12.9797	12.897
ENSDARG00000005536	ubr7	Turquoise (M1)	9.19401	9.24408	9.0877	9.11793	9.19068	9.53379	9.53841	9.51236	9.63495	9.38095	9.37053	9.29984	9.23737	9.24603	9.18349	9.03912	9.06294	9.1767
ENSDARG00000005540	xpo7	Turquoise (M1)	10.7326	10.7688	10.8504	10.9974	10.8514	10.2461	10.4011	10.4391	10.3213	10.1441	10.8015	10.8131	10.618	10.6822	10.9545	10.871	11.0189	11.0214
ENSDARG00000005544	btbd3a	Turquoise (M1)	9.64384	10.0538	9.78256	9.99951	9.83573	8.50271	8.63576	8.40932	8.64983	7.7329	9.42131	9.70023	9.48764	9.66452	9.74251	9.79804	10.1127	9.81414
ENSDARG00000005551	hnrnph1l	Turquoise (M1)	9.76866	9.68395	9.71542	9.90903	9.80877	10.4283	10.7093	10.2862	10.4501	10.8491	10.2141	10.0742	9.92468	9.89764	9.79445	9.70083	9.80745	9.69022
ENSDARG00000005565	entpd8	Turquoise (M1)	5.36201	5.24239	5.71567	5.46137	5.4257	7.58558	8.4999	6.59471	7.18442	7.27561	7.0006	5.80089	5.34264	5.99197	5.53796	5.61871	5.70197	4.88126
ENSDARG00000005576	mphosph8	Turquoise (M1)	10.5461	10.3756	10.4593	10.5391	10.5214	11.0625	11.2531	10.6417	10.6899	11.3962	10.2737	10.3577	10.3552	10.4119	10.3909	10.4558	10.4553	10.4774
ENSDARG00000005612	aph1b	Turquoise (M1)	8.73649	8.6423	8.68115	8.84856	8.74709	10.0549	10.1615	9.77092	9.77009	10.2034	9.55869	9.16831	9.0532	8.93941	9.23556	8.56797	8.93938	8.86349
ENSDARG00000005625	maco1a	Turquoise (M1)	10.2043	10.2489	10.2058	10.4093	10.2811	9.68716	9.71332	9.85887	9.96325	9.22118	9.7952	10.2068	10.0747	10.053	10.4875	10.1258	10.416	10.3509
ENSDARG00000005626	si:ch211-133l11.10	Turquoise (M1)	7.7253	7.67138	7.84988	7.81098	7.78374	7.15163	7.29499	7.26398	7.51979	6.93531	7.50341	7.58387	7.82481	7.64136	7.79885	7.67833	7.89705	7.99751
ENSDARG00000005629	smyd2b	Turquoise (M1)	6.32907	6.0619	6.39902	6.26824	6.21546	6.89379	6.579	7.04395	6.7159	7.16123	6.14441	6.00501	6.29585	5.89278	6.10405	5.94222	6.12808	6.12787
ENSDARG00000005640	adat3	Turquoise (M1)	6.47005	6.7203	6.46555	6.44505	6.52438	7.38524	6.92838	7.20983	6.78077	7.2938	6.32265	6.58308	6.25746	6.3249	6.4914	6.69144	6.49744	6.51601
ENSDARG00000005643	gcat	Turquoise (M1)	7.53234	7.22439	7.15136	7.16595	7.2912	7.95515	7.98064	7.70835	8.11474	8.12436	7.89504	7.31224	7.69392	7.23597	7.09156	7.1414	7.11361	7.18214
ENSDARG00000005648	olfml2a	Turquoise (M1)	7.88715	7.1611	7.6507	7.29419	7.49648	6.54735	6.54674	6.62316	6.24285	6.0633	7.57887	7.67212	7.63085	7.46119	8.22713	7.4023	7.48201	7.96482
ENSDARG00000005670	ttbk2a	Turquoise (M1)	11.7508	11.7772	11.8418	11.6748	11.7243	9.50686	9.85981	9.96478	10.2112	9.18072	11.1795	11.5348	11.6646	11.6171	11.4804	11.5403	11.7625	11.5531
ENSDARG00000005673	f3b	Turquoise (M1)	6.44757	6.08618	6.38185	6.35962	6.32672	7.31161	8.40307	7.18195	7.82119	8.10918	7.18896	6.62259	6.31462	6.16929	6.40479	6.4483	6.15039	6.43914
ENSDARG00000005675	sec61a1l	Turquoise (M1)	9.78379	9.63122	9.81804	9.76762	9.76829	10.6371	10.8562	10.481	10.5931	10.7989	10.2173	9.9218	9.88648	9.71857	9.70608	9.66102	9.68047	9.77338
ENSDARG00000005704	eps8l3b	Turquoise (M1)	4.5503	4.76265	4.73353	5.36297	4.78307	5.49549	5.98472	5.3158	5.23277	6.32694	5.15154	4.47571	4.74046	4.82578	4.54163	4.77675	4.50414	4.78628
ENSDARG00000005716	olfml2ba	Turquoise (M1)	8.97017	8.51481	8.51784	8.8448	8.70866	7.82095	8.04917	8.15908	7.79069	7.34699	8.63456	8.4096	8.73673	9.06739	9.07671	8.8148	8.5799	8.7723
ENSDARG00000005738	rpf1	Turquoise (M1)	8.51557	8.74527	8.66087	8.78727	8.69299	9.83591	9.97973	9.24653	9.39397	10.0134	8.57258	8.55186	8.58693	8.41214	8.61311	8.60944	8.58375	8.52648
ENSDARG00000005754	ptprfb	Turquoise (M1)	12.1833	12.1854	12.2921	12.0469	12.1777	11.4241	11.2263	11.8582	11.9647	11.181	12.4132	12.2678	11.9824	12.2499	12.2378	12.4349	12.2897	12.4764
ENSDARG00000005772	tsr2	Turquoise (M1)	6.85513	6.86123	7.03885	7.19015	7.0127	8.47329	8.51207	7.95687	8.30755	8.69434	7.97311	7.41116	7.28333	7.37026	7.17038	7.05871	7.01282	6.88901
ENSDARG00000005774	ddx3b	Turquoise (M1)	12.0605	12.2195	12.3783	12.0334	12.2041	12.3148	12.6441	12.3971	12.6961	12.5727	12.2261	12.1976	12.2244	12.1956	12.0827	12.1607	12.0162	12.0923
ENSDARG00000005780	npy8br	Turquoise (M1)	9.76648	9.61579	9.86008	9.83156	9.75516	7.74262	7.72504	8.28534	8.12941	7.44771	8.8642	9.13125	9.23269	9.43149	8.97946	9.21716	9.29162	9.05204
ENSDARG00000005783	ncanb	Turquoise (M1)	11.1645	11.6707	11.7393	11.572	11.4904	8.69656	9.23816	9.46183	9.90924	8.45557	11.5033	10.8323	11.0528	11.352	11.3874	11.8205	11.3917	11.5786
ENSDARG00000005786	ppm1f	Turquoise (M1)	8.86826	9.06246	9.11774	9.29887	8.99072	6.76309	7.05785	6.84363	7.07617	6.30847	8.99172	8.93015	8.82027	9.10849	9.31171	9.39348	9.48276	9.50344
ENSDARG00000005800	ampd3a	Turquoise (M1)	6.171	6.01188	6.15596	5.50725	5.95872	4.94917	5.40971	5.17973	5.40292	5.03592	5.79309	5.84934	5.73304	5.72662	6.23796	6.02433	5.8235	5.90845
ENSDARG00000005821	ncf2	Turquoise (M1)	8.54639	8.6423	9.075	8.98784	8.82101	10.2644	9.35736	9.96209	10.0832	10.2328	9.53326	9.33285	8.74003	9.0464	8.88286	8.61963	8.40821	8.64233
ENSDARG00000005834	gatad2b	Turquoise (M1)	11.7005	12.079	12.3919	11.718	11.9642	9.42484	9.55219	9.85307	10.2169	8.78293	11.1914	11.8906	11.904	11.9971	11.899	12.1429	12.1559	12.1386
ENSDARG00000005853	slc25a6	Turquoise (M1)	10.7078	10.7001	10.7454	10.7341	10.7587	9.40553	9.39936	9.66242	9.97409	9.09879	10.2489	10.1931	10.5482	10.5365	10.4913	10.3729	10.4236	10.2905
ENSDARG00000005891	cyb5r3	Turquoise (M1)	8.74093	8.68734	8.60182	8.61274	8.67317	9.45333	9.65065	9.10487	9.11915	9.88898	9.25083	8.87845	8.87238	8.62206	8.67215	8.65372	8.74703	8.50849
ENSDARG00000005908	clk4b	Turquoise (M1)	9.58827	9.43201	9.2434	9.50784	9.46398	10.5056	10.7611	10.1605	10.1587	10.791	9.46678	9.41674	9.45387	9.29802	9.34276	9.36233	9.50116	9.44092
ENSDARG00000005915	tcf3a	Turquoise (M1)	10.1963	10.2724	10.4327	10.0345	10.1879	8.78598	8.95645	8.9147	9.06186	8.06787	10.3533	10.5358	10.2469	10.4353	10.6212	10.671	10.5506	10.5406
ENSDARG00000006065	znf385b	Turquoise (M1)	8.96259	9.1956	9.2947	9.0511	9.1222	7.2947	7.13437	8.02578	7.75952	7.14123	7.9372	8.86257	8.8542	9.01702	8.95773	9.08977	9.2292	8.8564
ENSDARG00000006079	gpr37l1a	Turquoise (M1)	6.8718	6.79258	6.95089	5.94687	6.66381	5.2179	5.49048	5.57478	5.7061	5.03592	7.10733	6.90313	7.0763	6.70481	7.03642	6.99648	6.7585	6.91711
ENSDARG00000006094	igf2r	Turquoise (M1)	12.0877	12.112	12.1496	12.1508	12.0815	10.899	11.0385	11.0464	11.2548	10.3197	12.1214	12.0607	11.9521	11.9799	11.9864	11.9979	12.0321	11.9653
ENSDARG00000006225	ddx39aa	Turquoise (M1)	9.90938	9.92517	10.0023	9.95846	9.97322	10.9106	10.6872	10.6257	10.8768	11.153	10.3639	10.1037	9.96613	9.85755	10.102	9.8525	10.0668	10.1118
ENSDARG00000006242	ptp4a1	Turquoise (M1)	12.0163	12.0846	12.0661	12.2607	12.1371	13.1379	13.6254	13.2874	13.6561	13.6828	12.6113	12.4143	12.5706	12.3619	12.3843	12.1012	12.4605	12.2498
ENSDARG00000006253	mier3a	Turquoise (M1)	9.39335	9.44953	9.68567	9.44975	9.52711	8.63481	8.78012	8.95318	9.15055	8.41092	9.20861	9.51475	9.48568	9.42946	9.51617	9.46178	9.51329	9.61042
ENSDARG00000006290	ndufs5	Turquoise (M1)	9.16125	9.24659	9.36941	9.22574	9.2772	10.4818	10.4206	10.1248	10.2462	10.953	9.67947	9.32128	9.34535	9.57211	9.33155	9.10143	9.05743	8.92913
ENSDARG00000006299	arhgef7a	Turquoise (M1)	11.4539	11.5927	11.6364	11.827	11.6417	10.3046	11.1312	10.7305	10.8861	10.1867	10.9075	11.3543	11.1496	11.2259	11.3894	11.4825	11.2902	11.535
ENSDARG00000006300	psmd9	Turquoise (M1)	8.06839	8.16771	7.96502	7.74771	8.01002	8.59439	8.54795	8.59127	8.55182	8.93956	8.07569	7.78374	7.81855	7.86889	7.8707	7.95203	7.83359	7.84052
ENSDARG00000006301	raph1a	Turquoise (M1)	10.619	10.894	10.8571	10.6699	10.7662	9.22342	9.52649	9.60667	9.91206	9.00101	10.4587	10.3521	10.5799	10.7494	10.6143	10.7892	10.6881	10.7383
ENSDARG00000006392	exosc9	Turquoise (M1)	7.6029	7.77289	7.84988	7.86412	7.79115	8.71553	9.0287	8.53798	8.55182	9.01732	7.9057	7.84458	7.73447	7.79491	7.65236	7.54703	7.82708	7.76647
ENSDARG00000006395	rbm25b	Turquoise (M1)	10.4341	10.4729	10.5139	10.3135	10.4707	11.0613	11.1732	10.8876	10.7798	11.3562	10.2706	10.3624	10.3466	10.3724	10.3033	10.3669	10.3723	10.4233
ENSDARG00000006396	nrcama	Turquoise (M1)	12.8591	12.9675	12.9739	12.9146	12.91	11.78	11.9841	12.2274	12.2801	11.5711	12.3917	12.5267	12.7533	12.8248	12.7731	12.7958	12.8924	12.7263
ENSDARG00000006408	hmgb3b	Turquoise (M1)	9.3504	9.32697	9.50056	9.43236	9.43134	10.4378	10.7207	9.99535	10.3826	10.4485	9.79377	9.22734	9.27199	9.25978	9.25349	8.96444	9.24142	8.98866
ENSDARG00000006413	rpl38	Turquoise (M1)	9.46487	9.40534	9.35897	9.49832	9.47774	11.2678	11.4697	10.7602	10.6857	11.7216	10.6817	10.2652	9.67173	9.74648	9.65304	9.61093	9.48276	9.46439
ENSDARG00000006427	fabp2	Turquoise (M1)	5.61284	5.2927	5.23972	4.98364	5.27791	7.02354	6.0097	6.02879	6.24285	7.12093	4.79455	5.18641	5.6717	5.66549	5.27911	5.58068	4.92193	4.52365
ENSDARG00000006434	polr1e	Turquoise (M1)	7.51152	7.40784	7.19013	7.71499	7.46892	8.46583	8.29923	7.95687	8.03906	8.22638	7.7546	7.58387	7.11817	7.42058	7.58736	7.38794	7.47368	7.48123
ENSDARG00000006524	supt6h	Turquoise (M1)	11.997	11.9416	12.0122	12.0135	12.002	11.3543	11.7484	11.5816	11.8055	11.2533	11.9004	11.9321	11.9205	11.9934	11.9295	11.917	12.0963	12.0225
ENSDARG00000006544	c1qtnf6b	Turquoise (M1)	4.93326	5.18916	5.14064	4.98364	5.0344	7.18879	7.08014	6.70511	7.72765	7.87166	5.81831	5.18641	5.57289	5.41994	5.49117	5.41341	5.36712	5.28348
ENSDARG00000006584	phf8	Turquoise (M1)	11.4952	11.4036	11.4944	11.5277	11.4927	10.5986	10.6419	10.6758	10.9506	10.1963	11.027	11.3174	11.3058	11.3179	11.4632	11.303	11.4167	11.4382
ENSDARG00000006585	DMWD	Turquoise (M1)	9.52016	9.78739	10.0627	9.48633	9.72855	8.28279	7.85217	8.59823	8.65995	7.91312	9.20002	9.52989	9.53781	9.60477	9.71689	9.8891	9.90891	9.83409
ENSDARG00000006600	lsm14aa	Turquoise (M1)	10.329	10.3196	10.3707	10.2095	10.3236	9.76345	9.04272	9.48825	9.98752	9.59342	10.4186	10.298	10.3126	9.93522	10.0838	10.2644	10.2471	10.3009
ENSDARG00000006601	kaznb	Turquoise (M1)	9.37347	9.72406	10.3048	9.66075	9.7608	8.59097	8.20237	8.48639	9.47059	8.5854	9.77076	9.23557	9.46389	9.73506	9.60264	10.1307	9.67328	9.45505
ENSDARG00000006609	map2k2a	Turquoise (M1)	10.2901	10.2871	10.3424	10.3364	10.3362	10.5737	10.8538	10.5089	10.6363	10.6785	10.3629	10.213	10.2699	10.1956	10.2611	10.1582	10.2227	10.215
ENSDARG00000006666	si:dkeyp-69c1.6	Turquoise (M1)	8.33313	8.07451	8.06642	8.13483	8.17738	8.5978	8.67594	8.33206	8.52254	8.9049	8.05193	7.94895	8.20658	8.19989	8.07357	8.07883	8.24755	8.00396
ENSDARG00000006760	slc24a3	Turquoise (M1)	11.0067	10.9357	11.1841	11.02	11.0655	8.29547	8.30856	8.78663	9.11181	8.0835	10.0999	11.0017	10.9071	10.9736	10.9166	10.5005	10.8176	10.3672
ENSDARG00000006773	elovl4a	Turquoise (M1)	10.6987	10.8908	11.0774	10.8207	10.8862	9.25398	9.85187	9.78925	10.0374	9.12411	10.3416	10.5012	10.6171	10.71	10.7676	10.7819	10.9939	10.8396
ENSDARG00000006786	copz2	Turquoise (M1)	7.92685	7.97482	8.0246	8.03922	8.02892	8.94703	9.24787	8.40932	8.94548	9.25367	8.46176	8.12397	8.1579	8.21883	8.07357	8.08473	8.11533	8.13308
ENSDARG00000006797	nt5dc1	Turquoise (M1)	10.0066	10.2363	10.2023	10.1545	10.1753	8.67412	8.9021	8.9147	9.39397	8.48719	9.88635	9.74563	10.1597	10.1273	10.0189	10.0131	10.0051	10.0635
ENSDARG00000006840	gnmt	Turquoise (M1)	6.42471	5.87714	5.85491	5.88418	5.98691	7.89521	8.26127	7.57988	7.29368	7.66506	7.06946	6.50038	5.99925	6.75888	5.78324	6.27557	6.12808	6.15277
ENSDARG00000006877	enpp4	Turquoise (M1)	8.57655	8.731	8.81255	8.79896	8.70085	6.89379	7.10209	7.43074	7.47429	6.70709	8.37263	8.54192	8.42379	8.53798	8.6452	8.57427	8.40821	8.44371
ENSDARG00000006894	oprk1	Turquoise (M1)	8.48937	8.7699	9.02567	8.71916	8.728	6.83592	7.62351	7.15351	8.20519	7.21959	9.05267	8.0879	8.24437	8.56409	8.61774	8.89241	8.62167	8.46252
ENSDARG00000006900	impdh2	Turquoise (M1)	8.68667	8.26019	8.39627	9.27955	8.66114	9.57758	10.2107	9.45228	9.66535	10.2999	9.05981	8.61013	8.25829	8.36195	8.09369	7.98717	8.50476	8.04831
ENSDARG00000006990	creld1b	Turquoise (M1)	8.72307	9.15613	9.01772	8.86348	9.00664	8.34508	8.72897	8.44837	8.75108	8.1344	8.70617	8.88371	9.01554	8.83306	9.07335	8.85154	9.03514	8.84928
ENSDARG00000007045	cnot4a	Turquoise (M1)	9.48089	9.49662	9.42651	9.48874	9.49589	8.40867	8.3767	8.84918	8.90638	8.24964	9.27762	9.46483	9.369	9.67993	9.5285	9.45384	9.45576	9.51473
ENSDARG00000007065	mrps18b	Turquoise (M1)	8.15107	7.85448	7.83177	7.92966	7.97146	8.77096	8.74279	8.19631	8.48508	9.03345	8.22761	7.76096	7.97876	7.92774	7.83921	7.77308	7.93985	7.84052
ENSDARG00000007077	ankrd50l	Turquoise (M1)	9.4941	9.7753	9.69731	9.76366	9.6936	9.1922	9.02587	9.13386	9.01538	8.69772	9.35706	9.25799	9.38596	9.52737	9.73189	9.56326	9.79425	9.60409
ENSDARG00000007081	pias4a	Turquoise (M1)	10.2749	10.2944	10.2895	10.2638	10.298	9.64169	9.98264	9.86175	10.1623	10.0548	10.0918	10.1899	10.1121	10.1812	10.3004	10.2395	10.2495	10.2733
ENSDARG00000007092	xab2	Turquoise (M1)	8.95113	8.77338	8.91595	8.71505	8.86361	8.4807	8.66509	8.64601	8.55182	8.01993	8.88581	8.88894	8.8265	8.85436	8.90194	8.84462	9.07937	8.9919
ENSDARG00000007125	asb6	Turquoise (M1)	8.49465	8.48535	8.67442	8.4882	8.54809	7.97634	8.13572	8.14962	8.18194	7.54172	8.48674	8.65386	8.4279	8.42033	8.53205	8.5122	8.59904	8.61738
ENSDARG00000007130	mrto4	Turquoise (M1)	6.78635	6.65958	6.86906	6.65513	6.77505	8.36926	8.95349	7.87875	8.53359	8.49499	7.84606	6.87104	6.59864	6.82359	7.07798	6.71508	6.87878	6.81615
ENSDARG00000007135	cnot3a	Turquoise (M1)	10.8837	10.9043	10.9732	11.0142	10.9608	10.5624	10.5961	10.8112	10.728	10.412	10.7901	10.9262	10.8812	11.0301	10.8709	10.8317	10.932	10.96
ENSDARG00000007136	sh3bp5lb	Turquoise (M1)	11.2549	11.2341	11.3322	11.1669	11.2538	9.41715	9.53048	9.57533	9.93442	8.82989	10.5418	10.818	11.0395	10.9292	11.0275	11.2096	11.1893	11.0269
ENSDARG00000007149	l1cama	Turquoise (M1)	12.2909	12.387	12.5133	12.2412	12.3697	10.3717	10.512	10.9163	11.013	10.0322	12.0854	12.0406	12.2504	12.3806	12.249	12.2828	12.3827	12.1328
ENSDARG00000007151	kcnk2b	Turquoise (M1)	8.85603	8.98046	8.91595	8.92522	8.90498	7.24275	7.05785	7.59396	7.74048	7.33826	8.1802	8.25573	8.66899	8.72483	8.63154	8.52309	8.75046	8.79101
ENSDARG00000007172	plxna3	Turquoise (M1)	13.068	13.1806	13.1922	12.8957	13.0558	11.1785	11.2239	11.6563	11.6961	10.6272	12.732	13.2083	13.0909	13.1666	13.2777	13.3652	13.4593	13.3092
ENSDARG00000007186	ppp1r8a	Turquoise (M1)	7.27206	7.20361	7.40261	7.42191	7.34286	6.13946	6.37261	6.42639	6.53109	5.86837	6.84041	7.14501	7.11817	7.54662	7.49915	7.42122	7.66865	7.20494
ENSDARG00000007196	rae1	Turquoise (M1)	9.37347	9.27388	9.27484	9.30435	9.32621	9.69355	9.70629	9.7304	9.97139	9.83329	9.52297	9.34432	9.30803	9.07778	9.26827	9.26201	9.19444	9.17385
ENSDARG00000007207	cnpy2	Turquoise (M1)	7.08626	7.60208	7.25549	7.27173	7.32242	7.07421	6.91599	6.65103	7.02405	6.49865	7.22376	7.52409	7.47975	7.10819	7.25706	7.32898	7.32386	7.75119
ENSDARG00000007220	ncam1b	Turquoise (M1)	11.8609	11.8663	12.0215	11.9168	11.9267	11.1323	11.5035	11.5613	11.5175	10.6378	11.5365	11.857	12.0055	11.9737	11.9122	11.5807	11.9256	11.3553
ENSDARG00000007245	rundc3aa	Turquoise (M1)	10.3037	10.3927	10.3934	10.4641	10.399	8.95502	9.12674	9.45802	9.745	9.09623	10.002	9.80908	10.2492	10.1979	10.2313	10.0526	10.2041	10.0245
ENSDARG00000007257	rab5ab	Turquoise (M1)	10.0139	10.0835	10.1256	10.059	10.0823	9.27328	9.35287	9.12667	9.74184	9.35124	9.91419	9.95709	9.93911	9.96905	9.92695	9.96203	10.0886	9.93665
ENSDARG00000007264	nipsnap2	Turquoise (M1)	8.27293	8.95921	8.97459	8.58148	8.7203	8.98136	9.1657	9.15523	9.30019	9.65028	8.72727	8.91996	8.54597	8.84527	8.78342	8.55316	8.71232	8.60896
ENSDARG00000007271	mynn	Turquoise (M1)	8.57157	8.62311	8.4406	8.67754	8.60363	7.99202	7.83931	8.18246	8.26394	7.58649	8.63136	8.85724	8.52312	8.65367	8.57553	8.65966	8.78093	8.86349
ENSDARG00000007285	mrpl57	Turquoise (M1)	7.70714	7.88714	7.80728	7.87155	7.87721	8.76187	8.69027	8.55953	8.59465	9.22587	7.60535	7.74943	7.97876	7.74336	7.6704	7.31891	7.43124	7.57993
ENSDARG00000007323	chmp4bb	Turquoise (M1)	9.8975	9.87098	9.80272	9.94626	9.90357	10.705	10.428	10.4226	10.8149	10.9649	10.2737	10.0358	10.1731	9.8991	9.66871	9.87305	9.8764	9.71587
ENSDARG00000007347	degs1	Turquoise (M1)	9.21651	9.21108	9.19021	9.3098	9.24804	10.1132	9.93836	9.77246	9.64515	10.0963	9.83873	9.33477	9.19228	9.27565	9.01144	8.82187	8.84	9.10381
ENSDARG00000007359	zgc:56596	Turquoise (M1)	8.35652	8.20438	8.4406	8.39874	8.37222	9.04767	8.92044	8.57725	9.0644	9.10643	8.30998	8.24759	8.4523	8.00079	8.28655	8.07586	8.30934	8.26229
ENSDARG00000007362	sft2d1	Turquoise (M1)	8.32129	8.45091	8.34206	8.16533	8.32721	9.49595	9.45283	8.93407	8.93996	9.42439	8.78879	8.81661	8.29925	8.3956	8.22713	8.14815	8.35963	8.15641
ENSDARG00000007387	irf2a	Turquoise (M1)	9.0222	9.10454	9.0877	9.1426	9.1016	9.23441	9.29314	9.30928	9.34262	9.47446	9.09963	9.0864	9.18503	9.1286	8.94307	9.08537	8.89365	8.97237
ENSDARG00000007398	lrrk1	Turquoise (M1)	10.0555	10.3513	10.2629	10.1223	10.1497	8.59097	8.28983	9.09998	8.88643	8.40265	10.383	10.2491	10.3892	10.2482	10.2699	10.3991	10.3352	10.5127
ENSDARG00000007405	strap	Turquoise (M1)	9.80515	9.8612	9.91952	9.96711	9.91204	10.3252	10.538	10.298	10.6431	10.5369	10.1894	9.82144	9.88051	9.93949	9.85637	9.66985	9.8254	9.71196
ENSDARG00000007413	arid2	Turquoise (M1)	10.5128	10.7956	10.8937	10.6453	10.7235	9.87854	10.3581	10.4885	10.5348	10.1027	10.6114	10.7024	10.6726	10.7413	10.7414	10.8946	10.8791	10.9575
ENSDARG00000007429	ndor1	Turquoise (M1)	8.1776	8.15705	8.13679	8.5633	8.2702	9.38201	9.9503	8.93407	9.10935	9.58797	8.29792	8.08332	8.07113	8.19512	8.0668	8.18709	8.22305	8.01677
ENSDARG00000007438	ube2ib	Turquoise (M1)	9.72002	9.76484	9.684	9.84476	9.77759	10.4225	10.4076	10.2258	10.2395	10.7534	9.97586	9.9307	9.73098	9.8844	9.94545	9.662	9.87012	9.68424
ENSDARG00000007526	ndufs2	Turquoise (M1)	10.591	10.5439	10.7542	10.7442	10.6885	11.1544	10.9304	11.0945	11.0156	11.315	10.788	10.6972	10.5927	10.7446	10.6743	10.3759	10.4511	10.5636
ENSDARG00000007531	zcchc9	Turquoise (M1)	6.73239	6.86123	7.04946	6.96963	6.91975	7.49266	7.32316	7.16305	7.21254	7.50331	6.94924	6.8382	6.85812	7.05575	6.77399	6.79838	6.90414	6.98495
ENSDARG00000007566	appbp2	Turquoise (M1)	11.0186	11.0691	11.0575	11.1342	11.091	9.9799	9.99278	10.1768	10.4197	9.52475	10.8233	10.8227	10.8084	10.9068	10.925	10.917	10.9544	11.0387
ENSDARG00000007597	bloc1s4	Turquoise (M1)	7.45808	7.1611	7.43511	7.3163	7.363	7.97107	7.87125	7.66902	7.65492	7.57912	7.24931	7.46875	7.34606	7.31807	7.40508	7.54703	7.35148	7.4997
ENSDARG00000007601	zmynd8	Turquoise (M1)	10.9427	11.4796	11.4887	11.0882	11.2644	10.1874	10.0466	10.3596	10.5584	10.0639	10.6291	11.2019	11.1706	11.3674	11.1711	11.2763	11.1301	11.0023
ENSDARG00000007657	ccnh	Turquoise (M1)	8.08951	7.74462	7.84387	7.91535	7.91159	8.38516	8.40742	8.13051	8.05964	8.26341	7.87348	7.73781	7.66624	7.64136	7.99012	7.77308	7.88458	7.71224
ENSDARG00000007682	ppdpfa	Turquoise (M1)	6.42471	5.38599	5.71567	6.26824	5.92987	6.82405	7.59312	7.34983	7.03463	8.02534	5.91412	6.39694	5.73304	5.91834	6.21228	5.83884	6.05869	5.93812
ENSDARG00000007715	lgsn	Turquoise (M1)	5.46968	5.7884	5.77337	5.74796	5.70566	7.72391	8.92348	8.53072	8.45826	8.52576	6.94924	6.52852	7.18855	6.58974	6.23796	5.75908	6.5796	6.07654
ENSDARG00000007720	sub1b	Turquoise (M1)	10.4852	10.3302	10.2663	10.2511	10.3575	11.3808	11.3671	10.9668	11.0319	11.8069	10.2479	10.1686	10.3281	10.174	10.1363	10.0816	10.0791	9.84307
ENSDARG00000007723	efnb1	Turquoise (M1)	10.0994	10.0423	10.3487	9.95672	10.0958	8.59097	8.83597	8.95859	9.01538	8.06263	9.71608	9.95584	9.90718	9.87996	10.0483	9.96602	10.0194	9.91638
ENSDARG00000007727	rgl2	Turquoise (M1)	9.60053	9.73303	9.61375	9.69657	9.62929	8.8758	8.75988	9.23766	9.14816	8.5066	9.55195	9.56463	9.76378	9.67481	9.50124	9.52048	9.68584	9.56987
ENSDARG00000007745	uqcrfs1	Turquoise (M1)	10.9891	11.0061	11.2122	10.8168	11.0425	11.486	11.2823	11.3291	11.6124	11.8355	11.2161	10.9589	11.085	10.961	10.9654	10.865	10.9016	10.9902
ENSDARG00000007760	spg21	Turquoise (M1)	8.26676	7.81427	7.96502	7.97174	8.01635	9.05265	8.84561	8.74022	8.60166	9.29439	8.14919	8.29577	7.90977	7.88086	7.95386	8.02761	8.0555	7.78909
ENSDARG00000007795	cst3	Turquoise (M1)	10.5063	10.7905	10.5729	10.6082	10.6786	11.289	11.4105	10.874	11.3607	11.6851	10.3562	10.6254	10.6018	10.609	10.6765	10.4277	10.4553	10.3967
ENSDARG00000007856	rtn4rl1a	Turquoise (M1)	9.42404	9.70049	9.81193	9.46938	9.60442	8.23533	8.2419	8.58428	8.62939	7.71288	9.14288	9.31158	9.58813	9.69686	9.29449	9.3465	9.51329	9.25688
ENSDARG00000007863	tra2a	Turquoise (M1)	10.4545	10.4372	10.5121	10.4407	10.4844	10.9925	11.3738	10.8697	10.7759	11.3046	10.1319	10.4159	10.4779	10.4221	10.19	10.2461	10.2854	10.2288
ENSDARG00000007869	ehd3	Turquoise (M1)	10.7883	11.0527	10.9138	11.1319	10.9477	8.5668	8.66146	8.88089	8.97816	8.00359	10.5886	10.5556	10.8225	10.7372	10.9034	10.9363	10.7337	10.9649
ENSDARG00000007892	pdcd2	Turquoise (M1)	7.14191	7.11726	7.22785	7.46204	7.23758	7.96048	7.78668	7.70835	7.97007	8.36484	7.46048	7.20583	7.17871	7.2075	7.36117	7.27269	7.21767	7.40486
ENSDARG00000007916	xpnpep3	Turquoise (M1)	8.36231	8.35173	8.37567	8.54025	8.42063	8.77096	9.5245	8.8227	8.96191	9.30106	8.41044	8.22702	8.20658	8.38307	8.19647	8.25932	8.28589	8.55304
ENSDARG00000007918	ttc27	Turquoise (M1)	9.38486	9.70597	9.71542	9.53603	9.58971	10.3527	10.3366	9.98611	10.5727	10.6175	9.64032	9.15751	9.48764	9.52358	9.39486	9.60275	9.68763	9.68024
ENSDARG00000007943	gabpb2a	Turquoise (M1)	7.77842	7.86764	7.67124	7.89362	7.80586	8.11646	8.5161	7.83211	7.997	8.40679	7.94755	7.83915	7.78036	7.72354	7.80701	7.86536	8.06104	7.74348
ENSDARG00000007960	hnrnpaba	Turquoise (M1)	12.1878	12.1403	12.101	12.2284	12.2117	12.585	12.6326	12.4698	12.7239	12.6544	12.4305	12.1934	12.2177	12.2163	12.1963	12.1832	12.2606	12.194
ENSDARG00000007989	nedd8	Turquoise (M1)	9.2197	9.27388	9.17124	9.26558	9.25605	10.2644	10.1705	9.98876	9.96733	10.5896	9.47036	9.39668	9.13574	9.5592	9.26238	8.87042	8.90291	8.93586
ENSDARG00000007996	pou2f1b	Turquoise (M1)	10.9741	11.001	11.0569	10.7044	10.9336	9.33175	9.60604	9.78773	9.86482	8.87536	10.2426	10.8207	10.6777	10.9155	11.1703	11.1814	11.1536	11.1934
ENSDARG00000008020	med31	Turquoise (M1)	7.74323	7.67138	7.93144	7.95785	7.8491	8.55281	8.48353	8.18246	8.36232	8.68755	7.96294	7.86073	7.84345	7.95628	7.93166	7.69004	7.75351	7.91091
ENSDARG00000008068	tma16	Turquoise (M1)	6.6952	6.10999	6.39902	6.89749	6.52438	7.93905	7.95108	7.47716	7.58541	8.18837	7.0006	6.77004	6.58351	6.81089	6.63065	6.3799	6.49744	6.60627
ENSDARG00000008097	srsf9	Turquoise (M1)	8.67277	8.59974	8.78159	8.7476	8.73949	9.24531	9.13462	9.07529	9.03881	9.39141	8.80022	8.78044	8.75644	8.95076	8.73739	8.79877	8.72282	9.04271
ENSDARG00000008100	slc7a10a	Turquoise (M1)	8.19068	7.93165	7.6507	8.25879	8.01635	8.99435	8.34076	8.70198	8.8691	8.84825	7.96294	7.84998	7.90977	7.74991	8.17146	7.67833	7.90941	7.50884
ENSDARG00000008107	src	Turquoise (M1)	10.1486	10.3994	10.495	10.2225	10.3211	8.69974	8.85518	9.15523	9.48012	8.60714	9.95048	9.94835	10.0903	10.2239	10.3004	10.4404	10.4074	10.3672
ENSDARG00000008127	pcdh15b	Turquoise (M1)	10.5762	10.8779	10.9052	10.8593	10.7653	9.79347	9.84069	10.4029	10.6533	9.96518	10.7987	10.3839	10.6691	10.7551	10.8237	10.8521	10.7128	10.7412
ENSDARG00000008140	kcnab1a	Turquoise (M1)	9.99919	10.0249	10.7065	9.34476	10.0052	7.57865	8.14618	8.62573	8.99955	7.4232	8.61204	9.79661	10.0051	9.76907	9.95095	10.356	9.97328	9.54587
ENSDARG00000008184	mia3	Turquoise (M1)	11.0847	11.1402	11.2266	11.0682	11.1416	10.8591	10.8208	11.1803	11.0319	10.5463	11.1147	11.0901	11.0673	11.0599	11.0778	11.1371	11.0936	11.0969
ENSDARG00000008191	tmeff1a	Turquoise (M1)	8.92403	9.05103	9.12269	8.98443	9.04106	7.8671	8.21733	8.35691	8.69972	7.77853	8.63775	8.4738	8.85725	8.74127	8.80386	8.96444	8.81077	8.71467
ENSDARG00000008192	pank1a	Turquoise (M1)	10.501	10.4994	10.674	10.5157	10.5715	8.63481	8.71151	8.85209	9.16954	8.22169	10.1205	10.3521	10.461	10.3544	10.548	10.512	10.651	10.5636
ENSDARG00000008209	myt1la	Turquoise (M1)	12.5612	12.8781	12.9568	12.6723	12.7957	11.2672	11.2404	11.776	11.6128	10.923	12.1595	12.2301	12.5625	12.6717	12.5895	12.7485	12.8827	12.8111
ENSDARG00000008212	kcnk13a	Turquoise (M1)	8.12404	8.41564	8.29453	8.59943	8.36729	7.03382	7.01216	7.02307	7.82721	6.91174	7.99821	7.47579	7.87398	8.08068	8.23921	8.34046	8.13649	8.02947
ENSDARG00000008255	cnot6a	Turquoise (M1)	11.9646	11.7768	11.8864	12.0114	11.9103	10.9808	11.3749	11.2106	11.3028	10.5227	11.576	11.8746	11.7015	11.813	11.9824	11.9632	11.9692	12.0707
ENSDARG00000008275	klhl24b	Turquoise (M1)	8.59632	8.46392	8.63685	8.56787	8.58253	7.72391	7.38678	7.89585	7.80907	6.93531	8.16699	8.85724	8.02841	8.38726	9.00792	9.13586	9.11699	8.99512
ENSDARG00000008279	map2k7	Turquoise (M1)	9.94059	10.0132	10.0781	10.0213	9.93715	8.09242	8.10923	8.47509	8.67997	7.84129	9.51606	9.66865	9.80375	9.94375	9.86027	9.91658	10.025	9.96325
ENSDARG00000008322	ambra1a	Turquoise (M1)	10.0573	10.0807	10.2584	10.174	10.1135	8.5136	8.57525	8.80778	8.94823	8.01993	9.97586	10.3108	9.99404	10.0569	10.3651	10.2303	10.2983	10.2693
ENSDARG00000008329	asic1a	Turquoise (M1)	11.5768	11.5426	11.6595	11.4795	11.576	10.112	10.3748	10.4735	10.5656	9.59342	11.0582	11.3082	11.5377	11.5893	11.5611	11.5491	11.8165	11.5199
ENSDARG00000008363	mcl1b	Turquoise (M1)	9.05468	9.0539	8.81255	9.24864	9.04106	10.8718	10.9251	10.0871	10.2956	10.7631	9.55195	9.01639	9.24436	9.05167	8.61774	8.35029	8.42976	8.07917
ENSDARG00000008372	spred2b	Turquoise (M1)	10.9125	11.1253	11.2817	10.9554	11.0692	9.19445	9.36184	9.46183	9.93719	8.8019	10.5886	10.9262	11.1246	11.0553	10.9472	11.0496	11.056	10.9027
ENSDARG00000008383	arpc1a	Turquoise (M1)	11.0592	10.8852	10.9902	10.9991	11.0105	12.0194	12.1818	11.5904	11.8558	12.1516	11.561	11.1348	11.0901	11.11	11.0711	10.8491	10.9743	11.0635
ENSDARG00000008395	snupn	Turquoise (M1)	8.04696	7.91908	7.73114	8.13483	7.97146	8.477	8.88351	8.56665	8.49265	8.88725	8.08976	8.13284	7.88	7.93349	7.92418	7.85155	7.88458	8.02314
ENSDARG00000008398	cacna1c	Turquoise (M1)	13.1551	13.2592	13.2434	13.135	13.1891	11.6185	12.0765	12.2314	12.4403	11.5975	12.3938	12.7774	13.001	13.05	13.1244	13.0162	13.3301	13.0473
ENSDARG00000008434	bcl2l1	Turquoise (M1)	10.8502	10.7836	10.7935	10.7947	10.831	9.77854	9.77841	9.91279	10.4177	9.7512	10.7546	10.5679	10.7694	10.6197	10.5212	10.4535	10.7224	10.4843
ENSDARG00000008447	fkbp4	Turquoise (M1)	11.0012	11.0245	10.7228	11.0233	10.9939	9.96942	9.62293	9.99667	9.95781	9.98189	10.8331	10.7903	10.9554	11.0194	10.8573	11.0204	10.9161	10.7995
ENSDARG00000008457	faah2a	Turquoise (M1)	8.76732	8.70569	8.88133	8.66481	8.7734	9.07727	9.15283	9.41931	9.22277	9.27869	8.92024	8.75198	9.01554	8.90774	8.63611	8.66556	8.72978	8.42465
ENSDARG00000008472	apex2	Turquoise (M1)	7.57309	7.56206	7.76336	7.80322	7.69165	8.27854	8.29923	7.94597	8.02343	8.54841	7.56545	7.63497	7.63085	7.64136	7.9391	7.55987	7.80739	7.76647
ENSDARG00000008485	lrp3	Turquoise (M1)	10.5996	10.6528	10.834	10.7229	10.6944	9.67593	9.729	9.99535	9.78401	8.92809	9.80373	10.4241	10.4368	10.4493	10.4017	10.4219	10.5319	10.3061
ENSDARG00000008490	ltv1	Turquoise (M1)	8.44644	8.46392	8.2724	8.35711	8.40628	8.85315	8.96826	8.61548	8.82185	8.69434	8.71525	8.25573	8.44016	8.38307	8.44614	8.32559	8.50882	8.3659
ENSDARG00000008491	si:ch211-107o10.3	Turquoise (M1)	6.88827	6.76412	6.74301	7.2021	6.91975	7.52912	8.0931	7.46953	7.49722	7.84129	7.16227	7.24772	7.13864	7.17844	7.03642	6.88383	6.94132	7.18214
ENSDARG00000008494	myl6	Turquoise (M1)	10.6262	10.6556	10.5864	10.6678	10.6556	11.6703	11.7199	11.1872	11.4937	12.2142	11.3415	10.4866	10.4936	10.4191	10.2237	10.4552	10.5068	10.3534
ENSDARG00000008503	glcci1a	Turquoise (M1)	10.1914	10.3927	10.4327	10.0735	10.2719	8.63148	9.2111	9.21297	9.35511	8.48719	9.38197	9.87513	10.1373	10.2436	10.0987	10.356	10.4074	10.1044
ENSDARG00000008551	pole3	Turquoise (M1)	7.87095	7.5375	7.21852	7.6815	7.61845	8.46209	8.3039	8.14487	8.47365	8.68415	8.10832	7.86607	8.02841	7.88086	7.77407	7.56836	7.70463	7.81136
ENSDARG00000008560	brap	Turquoise (M1)	9.16456	9.21108	9.37149	9.17584	9.25339	8.73734	8.35434	8.96398	8.93996	8.52576	8.95897	9.22113	9.20906	9.19687	9.24156	9.11875	9.32873	9.14798
ENSDARG00000008575	lyst	Turquoise (M1)	12.0218	12.0716	12.2566	11.9425	12.0446	10.1072	10.3446	10.6086	10.6088	9.59161	11.4105	11.6163	11.8355	11.7808	11.689	11.8365	11.9268	11.7616
ENSDARG00000008593	nbas	Turquoise (M1)	11.5391	11.6726	11.681	11.9137	11.6473	10.6272	10.4033	10.8946	10.8506	9.96097	11.2414	11.3805	11.6737	11.441	11.8464	11.7239	11.6765	11.4245
ENSDARG00000008623	cops3	Turquoise (M1)	9.70647	9.66346	9.8058	9.90002	9.78683	10.1612	10.129	10.0697	10.2054	10.2797	9.80373	9.69577	9.71598	9.83632	9.74251	9.5935	9.77422	9.68424
ENSDARG00000008660	coro1b	Turquoise (M1)	10.4984	10.2413	10.4025	10.4506	10.417	9.76345	9.58704	10.0445	9.82198	9.52095	10.3397	10.5752	10.6305	10.417	10.5432	10.6676	10.6027	10.8078
ENSDARG00000008678	snx3	Turquoise (M1)	9.30314	9.16146	9.24113	9.26558	9.27194	10.0299	9.97243	9.69843	9.78092	10.3371	9.71608	9.33093	9.24436	9.27339	9.24156	9.06019	9.2292	9.11572
ENSDARG00000008723	prkcba	Turquoise (M1)	12.6429	12.5503	12.6569	12.508	12.6153	10.3211	10.4784	10.6375	10.8096	9.69488	11.3676	12.2208	12.4322	12.3191	12.5448	12.3094	12.5165	12.3899
ENSDARG00000008727	ranbp3a	Turquoise (M1)	9.26665	9.0738	9.34846	9.4645	9.23729	7.70496	7.70389	8.37324	8.01292	7.36429	8.81999	8.93269	8.66899	9.24603	9.38675	9.44243	9.40455	9.07358
ENSDARG00000008740	esf1	Turquoise (M1)	7.80426	8.16239	7.58724	8.02598	7.93851	9.26474	9.03992	8.70843	8.76677	9.31652	8.41789	8.0225	7.89198	8.08585	7.9091	7.54703	8.2524	7.68836
ENSDARG00000008748	ube2na	Turquoise (M1)	11.1184	11.0789	10.9649	11.1016	11.0985	11.7367	11.6962	11.4866	11.5381	12.0739	11.3993	11.1103	11.1724	11.2633	11.0761	10.9355	10.964	11.1118
ENSDARG00000008767	tle2b	Turquoise (M1)	9.95212	10.1533	10.2851	9.72745	10.0303	8.41643	9.04551	9.14102	9.12646	8.5409	9.33172	9.57926	9.65784	9.90202	9.85049	10.0161	10.0627	9.94502
ENSDARG00000008784	prpf4ba	Turquoise (M1)	10.9779	10.8344	11.1841	10.8101	10.9526	9.8883	9.96067	10.4098	10.5957	9.48818	10.3542	10.8282	10.4539	10.7535	10.6765	10.9862	10.7492	10.764
ENSDARG00000008785	dldh	Turquoise (M1)	10.625	10.5611	10.6622	10.6345	10.6525	10.9912	10.9988	10.9561	11.1235	11.1364	10.8359	10.6456	10.6359	10.4403	10.5013	10.3723	10.5358	10.4797
ENSDARG00000008790	actr3b	Turquoise (M1)	9.04752	9.16676	9.20428	9.34741	9.19347	6.65951	6.74383	7.03355	6.84271	6.04055	7.82935	8.45978	8.8542	8.77358	8.72886	8.88905	9.06019	8.25691
ENSDARG00000008818	hsf1	Turquoise (M1)	10.6226	10.593	10.6015	10.6539	10.6074	9.15567	9.93235	9.41144	9.64515	9.00919	10.229	10.3511	10.4818	10.4201	10.515	10.3578	10.5788	10.2983
ENSDARG00000008858	cyp7b1	Turquoise (M1)	7.34473	7.15027	7.04946	7.12883	7.17039	6.23561	6.29597	6.60901	6.08131	5.86837	7.06946	7.08141	7.01104	7.13873	6.63065	7.02171	7.08081	7.12346
ENSDARG00000008886	msx1b	Turquoise (M1)	5.17407	4.76265	4.49276	4.53257	4.78307	5.71434	5.22523	5.72761	5.13429	6.25143	5.32449	4.85994	4.74046	4.90271	5.39077	4.66491	4.50414	5.43193
ENSDARG00000008904	smarca2	Turquoise (M1)	11.8832	12.0235	11.788	11.8733	11.9082	10.6487	10.506	10.8546	10.9424	10.5217	11.4281	11.6536	11.8732	11.6887	11.7487	11.875	11.96	11.8815
ENSDARG00000008920	mrpl53	Turquoise (M1)	7.18224	6.91379	6.88105	6.94122	7.02549	7.91181	7.95704	7.60791	7.65492	8.44353	7.2744	6.73465	6.95421	6.94454	6.94938	6.79101	6.90414	6.35753
ENSDARG00000008936	sec11a	Turquoise (M1)	8.8804	8.83803	8.84885	9.00812	8.91513	10.2665	10.4141	10.047	10.0374	10.7453	9.40083	9.06806	8.95997	8.73471	8.9902	8.69475	8.90291	8.72638
ENSDARG00000008966	tbl1xr1b	Turquoise (M1)	10.4984	10.4633	10.605	10.6159	10.5467	10.2515	10.526	10.2873	10.4384	10.0613	10.3839	10.549	10.4916	10.4272	10.49	10.5223	10.4967	10.5161
ENSDARG00000008983	sh3glb2a	Turquoise (M1)	9.773	9.99984	10.1464	10.0622	10.01	7.5363	7.4813	8.14487	8.29893	7.50331	8.93067	9.55644	9.60633	9.89324	9.74673	9.71228	9.75901	9.55026
ENSDARG00000009018	rhbg	Turquoise (M1)	8.5914	7.78682	8.60889	8.01261	8.27548	6.34226	6.35387	6.8316	6.12366	5.66703	7.71267	8.74044	8.77267	8.48427	8.146	8.44044	9.00965	8.12127
ENSDARG00000009020	cnr1	Turquoise (M1)	12.7555	12.7662	13.2169	12.4913	12.8143	10.5334	10.7721	11.1031	11.2074	9.94827	11.9778	12.8677	12.769	12.6327	12.8665	12.6974	12.9321	12.7632
ENSDARG00000009031	tnikb	Turquoise (M1)	13.0238	12.8499	13.0387	12.8087	12.9239	11.6164	11.9161	12.0071	12.2211	11.4009	12.0787	12.6412	12.7639	12.6995	12.86	12.8414	12.884	12.9785
ENSDARG00000009133	myo1eb	Turquoise (M1)	5.41727	5.84829	5.48649	6.33737	5.74044	7.54345	8.28037	7.60095	7.15572	7.58649	6.00289	5.64206	6.15618	6.1898	5.49117	5.65547	5.63599	5.84684
ENSDARG00000009134	hlx1	Turquoise (M1)	6.25245	6.3064	6.00301	6.29169	6.23849	7.43228	7.17628	6.90225	6.66168	7.33826	6.55137	6.8382	6.45586	6.64849	6.07548	6.32878	6.42787	6.43914
ENSDARG00000009214	mfsd13a	Turquoise (M1)	9.93091	9.49028	10.073	9.76366	9.81781	10.2993	10.2182	10.1018	10.4057	10.1588	10.0008	9.82417	9.44984	9.68672	9.81472	9.61398	9.61816	9.66005
ENSDARG00000009215	zgc:112437	Turquoise (M1)	4.5503	4.5098	4.73353	4.16044	4.52177	5.94541	5.32189	5.5415	6.01498	6.53048	5.32449	4.92525	4.49681	4.82578	4.16044	4.66491	4.16044	4.16044
ENSDARG00000009217	tom1l2	Turquoise (M1)	10.4826	10.5601	10.5629	10.6762	10.5553	8.79493	8.94754	9.08026	9.23859	8.33472	10.0848	10.2162	10.2492	10.4829	10.5025	10.3873	10.4977	10.3357
ENSDARG00000009253	rtraf	Turquoise (M1)	9.24493	9.0738	9.22052	9.05435	9.16822	9.81996	10.0171	9.49012	9.82797	10.1927	9.41204	9.01639	9.09248	9.16558	8.97586	8.91076	9.12756	8.80947
ENSDARG00000009262	si:dkey-97m3.1	Turquoise (M1)	9.1141	9.37587	9.41043	9.53603	9.35384	7.78533	7.63847	7.91276	8.32038	7.5568	8.80589	8.85991	9.11045	9.14598	9.00086	9.11875	9.36267	9.10381
ENSDARG00000009266	uevld	Turquoise (M1)	8.07547	7.56206	6.75615	7.99232	7.57608	8.02289	8.29453	8.53435	8.48508	9.01732	8.00317	7.23111	7.68015	8.00079	7.84715	7.52537	7.75351	8.01038
ENSDARG00000009281	dnm1b	Turquoise (M1)	13.1136	13.1703	13.1519	13.1168	13.1579	11.2277	11.3694	11.7648	11.7051	10.8315	12.3401	12.7423	13.046	12.9129	13.0138	12.9192	13.2543	12.9842
ENSDARG00000009299	dusp8a	Turquoise (M1)	11.3393	11.5364	11.6617	11.4625	11.4994	9.7905	9.75477	10.171	10.4539	9.35552	11.2257	11.5791	11.3296	11.6357	11.5024	11.633	11.5909	11.3967
ENSDARG00000009350	atg3	Turquoise (M1)	9.46219	9.27142	9.32075	9.35534	9.3834	10.112	9.81969	9.81928	9.88218	10.0442	9.58367	9.44187	9.40272	9.40081	9.37041	9.12876	9.25112	9.33283
ENSDARG00000009372	diras1b	Turquoise (M1)	6.61761	7.11726	7.15136	7.05151	6.9998	5.34661	4.9217	5.17973	5.58171	5.03592	6.16339	5.69749	6.85812	6.4305	6.38222	6.85594	6.67199	6.81615
ENSDARG00000009390	npl	Turquoise (M1)	7.70714	7.60208	7.74412	7.92966	7.77629	8.86735	8.08224	8.69226	8.39906	8.49109	7.91628	8.12397	7.72108	7.51615	7.76571	7.63859	7.74663	7.4905
ENSDARG00000009447	atp5mc3b	Turquoise (M1)	10.2977	10.4039	10.7023	10.18	10.4348	11.5815	11.6944	11.247	11.3751	11.7701	11.0783	10.6371	10.5927	10.5487	10.4374	10.2728	10.1598	10.382
ENSDARG00000009459	slc35e4	Turquoise (M1)	9.69507	9.72406	9.90238	10.102	9.82501	7.50002	7.6084	7.84978	8.21896	7.32065	8.89383	9.08184	9.43159	9.27339	9.39755	9.30424	9.32414	9.08877
ENSDARG00000009482	slc38a8a	Turquoise (M1)	5.10153	5.51141	4.73353	4.98364	5.0344	6.39249	5.98472	5.81034	5.92059	5.99378	5.19798	5.31165	5.42526	5.24767	4.81693	5.36698	5.22554	5.28348
ENSDARG00000009493	MAP3K13	Turquoise (M1)	10.6512	10.8714	10.9301	10.5298	10.7032	8.20876	8.22721	8.42507	8.83083	7.61556	9.71909	9.99759	10.4867	10.4858	10.2961	10.7256	10.5594	10.5711
ENSDARG00000009524	rnf150b	Turquoise (M1)	9.67665	9.99389	10.1403	9.83912	9.9305	9.19445	9.18353	9.41144	9.48202	8.62501	9.48457	9.75282	9.67691	9.80387	9.98175	9.96761	10.0094	9.86264
ENSDARG00000009549	ubr4	Turquoise (M1)	14.1782	14.1784	14.3438	14.3544	14.256	13.5167	13.8624	13.9739	13.8957	13.2008	14.1875	14.3004	14.4196	14.2755	14.3313	14.1418	14.3557	14.3133
ENSDARG00000009568	ca10b	Turquoise (M1)	8.24812	8.30428	8.34206	8.8448	8.43955	9.32765	9.36408	9.42323	9.08705	9.56782	8.59573	8.31927	8.30819	8.6812	9.14557	8.05495	8.65862	8.54424
ENSDARG00000009585	papola	Turquoise (M1)	11.9169	11.9116	11.8677	11.927	11.9288	12.1402	12.2797	12.2786	12.1348	12.1881	11.7738	11.9593	11.8766	11.9495	11.9094	11.7898	11.9306	11.8555
ENSDARG00000009610	rgs12a	Turquoise (M1)	8.33313	8.24014	8.31633	7.91535	8.19977	7.03382	7.01216	7.4923	7.43523	7.36429	8.1175	8.34239	8.04993	8.20939	8.146	8.39844	8.24268	8.62991
ENSDARG00000009626	nrbp2b	Turquoise (M1)	11.4806	11.5277	11.5386	11.6859	11.576	10.3025	10.0029	10.5399	10.5736	9.77377	10.7302	11.1059	11.1253	11.274	11.0318	11.1236	11.3585	11.2779
ENSDARG00000009629	unc119.1	Turquoise (M1)	10.4585	10.2274	10.2403	10.1963	10.2954	9.81118	9.45911	9.83113	9.90642	9.73157	9.93633	10.0958	10.263	9.99255	10.2699	10.3481	10.3965	10.3009
ENSDARG00000009733	kif21b	Turquoise (M1)	10.1619	10.5337	11.0289	10.6225	10.5499	9.16489	9.05937	9.67069	9.57571	8.62855	10.4899	10.3359	10.4985	10.729	10.6429	10.948	10.9267	10.8179
ENSDARG00000009738	cacnb4a	Turquoise (M1)	10.5799	10.8526	10.7261	11.0349	10.7625	8.8185	9.00883	9.42518	9.48581	8.61073	10.1774	10.5308	10.5548	10.7575	10.6875	10.6899	10.7535	10.5808
ENSDARG00000009748	dffb	Turquoise (M1)	6.83826	6.83418	6.41597	6.94122	6.7597	7.21603	7.38678	7.55128	6.93635	7.47975	6.78258	6.97521	6.75482	6.61944	6.7909	6.72286	6.85294	6.67437
ENSDARG00000009753	sf3b6	Turquoise (M1)	9.44596	9.21108	9.30561	9.37108	9.35384	10.2439	9.85981	10.0356	9.93303	10.3682	9.25706	9.26404	9.03449	9.36524	9.14237	8.96125	9.16139	9.2132
ENSDARG00000009754	zc3h11a	Turquoise (M1)	11.2004	10.9542	10.9435	11.1563	11.0925	11.5507	11.9248	11.7194	11.3215	12.0493	10.7923	10.9872	10.8201	10.9363	11.2061	10.9937	11.1574	11.078
ENSDARG00000009771	ppme1	Turquoise (M1)	11.2068	11.3299	11.2684	11.5053	11.3529	12.1469	12.4378	12.0846	12.2559	12.6911	11.4689	11.0451	11.2947	11.4996	11.3231	10.944	11.1993	11.155
ENSDARG00000009779	mcl1a	Turquoise (M1)	9.61511	9.68024	9.76528	9.72745	9.71118	11.0352	11.736	11.1657	10.8388	11.6411	10.3436	10.1426	9.97456	9.43755	9.0044	9.24896	9.02951	9.23793
ENSDARG00000009783	dirc2	Turquoise (M1)	9.52016	9.68579	9.52877	9.74768	9.6334	9.33787	8.88973	9.45993	9.22957	9.07301	9.58861	9.71798	9.49548	9.55178	9.69519	9.77184	9.8189	9.7715
ENSDARG00000009796	klc1a	Turquoise (M1)	11.9232	12.1419	12.1233	12.1193	12.1196	10.5994	10.6819	10.9322	11.1512	10.1819	11.8777	11.87	12.0417	12.1126	12.0931	12.0539	12.15	12.0607
ENSDARG00000009806	smfn	Turquoise (M1)	8.63982	8.52312	8.61242	8.7068	8.64086	9.27754	9.63223	8.86368	9.17659	9.2094	8.84778	8.5319	8.5535	8.53421	8.65424	8.45872	8.67674	8.69096
ENSDARG00000009837	agk	Turquoise (M1)	8.9162	8.98948	8.47974	8.57242	8.75843	9.50323	9.06762	9.21974	9.01012	9.57702	8.75983	8.65386	8.83579	8.85738	8.53695	8.78798	8.6513	8.77981
ENSDARG00000009844	dusp23a	Turquoise (M1)	4.5503	4.76265	4.49276	4.89868	4.67012	5.6856	6.54674	5.63844	6.10267	6.34516	5.2842	4.98497	5.03879	4.97182	4.81693	4.66491	4.50414	4.78628
ENSDARG00000009864	ddx55	Turquoise (M1)	7.57309	7.42583	7.25549	7.40141	7.43132	8.20428	8.46696	8.04122	8.16306	8.64616	7.57887	7.84998	7.60189	7.38723	7.65236	7.521	7.83359	7.45308
ENSDARG00000009870	mapk8b	Turquoise (M1)	10.3022	10.3652	10.3571	10.3377	10.335	7.88403	7.97478	8.28102	8.32886	7.46382	10.1741	10.1621	10.2081	10.3597	10.3387	10.345	10.5259	10.1955
ENSDARG00000009899	znf385a	Turquoise (M1)	8.90436	8.95001	8.91879	9.07693	8.95507	6.32508	6.17178	6.73136	6.90198	6.57685	8.02776	7.94391	8.4999	8.71154	8.32106	8.57007	8.35963	8.34069
ENSDARG00000009930	cadm2a	Turquoise (M1)	10.3392	10.3314	10.4661	10.3026	10.3375	8.3122	8.68312	8.68901	9.0644	8.09383	10.0601	10.0788	10.2235	10.3544	10.4177	10.4318	10.5068	10.4077
ENSDARG00000009941	erc1a	Turquoise (M1)	11.5972	11.7292	11.8153	11.6067	11.7209	10.6388	10.5566	11.1814	11.0866	10.4821	11.2341	11.393	11.6742	11.4996	11.4689	11.5467	11.6299	11.6778
ENSDARG00000009950	edf1	Turquoise (M1)	9.24493	9.41205	9.15926	9.54531	9.38826	9.99159	9.89422	9.64408	9.88935	10.2987	9.56372	9.29591	9.22564	9.35247	9.35665	9.14716	9.18182	8.92236
ENSDARG00000009958	cbl	Turquoise (M1)	10.818	10.9279	10.9725	10.9432	10.911	9.60153	9.83587	10.0419	10.2772	9.29439	11.2038	10.9551	11.026	10.9512	10.8025	10.9183	10.8845	10.9674
ENSDARG00000010002	gna11a	Turquoise (M1)	11.0977	11.1239	11.26	11.2025	11.1807	9.09908	9.34836	9.52153	9.68197	8.77335	10.8268	11.1647	11.0627	11.1706	11.2213	11.2133	11.4097	11.464
ENSDARG00000010021	grpel1	Turquoise (M1)	8.9162	8.85128	9.0017	8.98784	8.96814	9.4439	9.64147	9.21523	9.53421	9.80696	9.22141	9.00438	9.07166	8.73799	8.88286	8.64577	8.7263	8.75716
ENSDARG00000010023	CU856539.1	Turquoise (M1)	11.8962	12.0268	12.2708	12.1251	12.0946	9.99418	10.467	10.3171	10.4949	9.42846	11.3429	11.6704	11.798	11.8543	11.4142	11.4343	11.5315	11.4669
ENSDARG00000010032	cmtm7	Turquoise (M1)	6.14266	6.2442	6.19646	6.11776	6.16812	8.35722	8.65417	8.00493	7.86283	8.64966	7.40114	6.69832	6.25746	6.39623	6.31209	6.48585	6.42787	6.47813
ENSDARG00000010042	dnm1a	Turquoise (M1)	12.8352	13.0404	13.1422	12.9748	12.9724	10.5823	10.9952	10.761	11.2453	10.0975	12.4419	12.6279	12.9454	12.9243	12.9387	12.8314	12.9202	12.7743
ENSDARG00000010051	ufd1l	Turquoise (M1)	9.6391	9.62738	9.74778	9.93395	9.75516	10.145	9.99854	10.1103	9.97274	10.3021	9.8607	9.69875	9.45588	9.73669	9.67759	9.53989	9.67688	9.49663
ENSDARG00000010059	itpkb	Turquoise (M1)	9.24493	9.44298	9.17838	9.63709	9.35881	7.21603	7.37787	7.43074	7.23098	6.57685	8.2735	8.29182	8.72344	9.0411	8.48721	8.88399	8.77421	8.94257
ENSDARG00000010078	nup133	Turquoise (M1)	8.93571	9.31268	9.25696	9.12723	9.17949	9.39382	9.55415	9.6015	9.4416	9.66588	9.38765	9.37634	9.18503	9.13856	9.09341	9.0721	9.09022	9.33283
ENSDARG00000010098	pank1b	Turquoise (M1)	11.0095	10.9185	11.0459	11.039	11.0371	9.57412	9.83265	9.92666	10.2282	9.32528	10.8435	10.7889	10.8092	10.7191	10.9924	10.9199	10.9062	10.9788
ENSDARG00000010108	bri3bp	Turquoise (M1)	9.81991	9.95612	10.0717	9.88184	9.9651	8.67735	9.07583	9.02974	9.37774	8.42732	9.8108	9.61915	9.91741	9.77546	9.87772	9.82025	9.96447	9.8732
ENSDARG00000010113	ndufb8	Turquoise (M1)	9.61027	9.62545	9.64329	9.97055	9.74192	10.6222	10.7023	10.4216	10.4117	10.9809	10.029	9.70321	9.70251	9.89471	9.69519	9.36233	9.4745	9.37308
ENSDARG00000010132	dacha	Turquoise (M1)	9.41017	9.853	10.0666	9.72949	9.77387	9.08943	8.98288	8.43677	9.50835	9.05994	9.8415	9.96577	9.84877	9.64546	9.89305	9.88742	9.89352	10.0818
ENSDARG00000010194	eif4bb	Turquoise (M1)	9.71552	9.82812	9.81499	9.75169	9.81058	10.8224	10.8249	10.5254	10.7821	11.0747	10.5578	10.106	9.90571	10.0829	9.74251	9.76453	9.79425	9.83949
ENSDARG00000010207	smad3b	Turquoise (M1)	9.4568	9.27634	9.29907	9.32335	9.33884	8.21767	8.15656	8.45606	8.56264	7.87765	9.13162	9.27607	9.38596	9.36947	9.23255	9.38516	9.35595	9.30189
ENSDARG00000010246	prmt1	Turquoise (M1)	12.0631	11.9877	12.1783	12.4128	12.171	12.6822	12.8113	12.2436	12.6384	12.7729	12.5815	12.0959	11.9914	12.0794	12.117	11.8092	12.0147	12.081
ENSDARG00000010276	ptgs2b	Turquoise (M1)	7.32092	7.343	6.84476	6.80563	7.11183	7.7113	7.43912	7.56565	7.83918	8.57072	7.16227	7.04372	6.91896	7.02331	6.66793	6.83463	6.61111	6.99813
ENSDARG00000010281	xpo4	Turquoise (M1)	9.27892	9.28124	9.38184	9.51494	9.3687	9.7297	10.1844	9.91558	9.80084	10.0402	9.57206	9.27607	9.3583	9.16558	9.33436	9.33913	9.13805	9.35561
ENSDARG00000010300	traf3ip1	Turquoise (M1)	8.81446	8.87417	8.82475	8.87825	8.86361	7.93364	8.17199	8.21909	8.35403	7.54172	8.21055	8.54524	8.65855	8.86939	8.77101	8.80592	8.72282	8.84928
ENSDARG00000010331	si:ch211-26b3.2	Turquoise (M1)	6.71393	6.67502	6.72974	6.69004	6.69653	5.71434	5.60108	5.91232	5.96869	5.46006	6.5791	6.92411	6.68605	6.63404	6.70421	6.63465	6.87878	6.53455
ENSDARG00000010400	lrrfip2	Turquoise (M1)	9.1345	8.98948	8.91879	9.08012	9.05644	9.70465	9.88024	9.5142	9.4318	10.0963	8.84778	9.06806	8.94288	8.76718	9.02543	8.93867	8.94536	9.08877
ENSDARG00000010408	igsf9b	Turquoise (M1)	6.88827	6.44095	6.86906	6.48578	6.68027	5.06755	4.99249	5.43489	5.23277	5.0944	6.78258	7.3201	6.67186	6.9675	7.22056	7.6586	7.33313	7.66406
ENSDARG00000010487	sae1	Turquoise (M1)	8.30334	8.56395	8.39218	8.59048	8.48578	9.38596	9.27663	9.38155	9.17894	9.79125	9.17173	8.81386	8.4999	8.61137	8.65424	8.50782	8.48019	8.81314
ENSDARG00000010515	dvl1a	Turquoise (M1)	8.93571	9.24408	9.075	8.93585	9.04106	8.15873	8.66146	8.34867	8.49265	7.91312	8.97165	8.80003	9.04788	8.95358	8.80386	8.96444	9.03233	8.97891
ENSDARG00000010524	si:ch211-282j22.3	Turquoise (M1)	9.64384	9.45387	9.4562	9.59081	9.52931	8.92277	9.22592	9.06529	9.1577	8.47935	9.88501	9.56953	9.6648	9.53681	9.55283	9.40411	9.62935	9.59349
ENSDARG00000010553	mmgt1	Turquoise (M1)	9.8241	9.85793	9.62946	9.86527	9.81601	10.2537	10.5789	9.91697	10.3631	10.6596	9.63874	9.69128	9.60994	9.78658	9.61656	9.41933	9.41752	9.31227
ENSDARG00000010583	pard3ab	Turquoise (M1)	10.0942	10.0877	10.2651	10.059	10.1002	9.33175	8.95645	9.44651	9.87786	9.19274	10.2374	10.3913	10.2129	10.2978	10.2947	10.3819	10.235	10.2288
ENSDARG00000010601	mtmr10	Turquoise (M1)	11.1361	10.9972	11.1268	11.1219	11.1022	10.52	10.3229	10.6905	10.5164	10.1379	10.6786	10.8076	10.9311	10.8451	10.9663	10.83	11.0338	10.8467
ENSDARG00000010681	tjap1	Turquoise (M1)	10.5359	10.5682	10.6605	10.2355	10.5081	9.67915	9.84229	10.1152	9.90075	9.58251	9.97837	10.3774	10.4276	10.4741	10.411	10.4518	10.6224	10.3967
ENSDARG00000010717	chchd10	Turquoise (M1)	7.919	8.01671	8.29453	7.82637	8.04757	8.73734	8.69739	8.50873	8.77609	9.27191	8.4067	8.11055	8.0972	8.05454	7.88618	7.82705	7.49854	7.64763
ENSDARG00000010732	xrcc4	Turquoise (M1)	7.18224	7.46983	7.21852	7.11624	7.25927	8.3122	8.63946	8.34039	8.33309	8.63562	7.4532	7.53086	7.37211	7.17844	7.13153	7.27269	7.35148	7.40486
ENSDARG00000010831	churc1	Turquoise (M1)	8.63982	8.57997	8.51784	8.39874	8.55244	9.05265	9.23328	8.66602	9.06694	9.47839	8.55919	8.45272	8.56846	8.36195	8.19647	8.3156	8.12065	7.6057
ENSDARG00000010844	kras	Turquoise (M1)	10.2298	10.2871	10.3016	10.293	10.2679	8.42798	8.26127	8.53798	8.8691	7.9815	10.1587	10.1393	10.1133	10.2978	10.1838	10.267	10.2435	10.4197
ENSDARG00000010873	si:dkey-156n14.5	Turquoise (M1)	11.7197	11.7768	11.7389	11.8627	11.8061	10.9418	10.529	10.9363	10.6507	10.8672	10.987	11.6424	11.4376	11.6967	11.8909	11.6729	11.6935	11.656
ENSDARG00000010933	cacna1fa	Turquoise (M1)	4.5503	5.58741	4.73353	5.36297	5.0344	6.99222	7.6084	5.39675	7.41929	7.66506	4.71069	5.58372	5.6717	4.82578	5.39077	5.36698	5.90707	5.47689
ENSDARG00000010934	syt14a	Turquoise (M1)	11.2346	11.3346	11.3654	11.2655	11.2637	8.54576	8.4586	8.96667	8.96735	7.98706	10.1068	10.6534	11.0843	11.0858	10.9995	11.0204	11.2155	11.081
ENSDARG00000010941	pomgnt2	Turquoise (M1)	10.4679	10.2438	10.4217	10.2426	10.3513	8.48439	8.7255	8.77132	9.0644	8.13939	9.61631	9.8445	9.99127	9.92376	10.0363	9.93948	10.143	9.88889
ENSDARG00000010956	sh3glb1b	Turquoise (M1)	8.90436	8.8644	9.27039	8.81824	8.97463	9.83447	10.1945	9.73671	9.57571	10.3263	9.35319	9.29393	8.97126	8.84527	8.92825	9.28008	8.87494	8.8058
ENSDARG00000010978	trmt1	Turquoise (M1)	8.53106	8.55588	8.45245	8.50259	8.52615	8.856	8.95645	8.88658	8.92885	8.95093	8.38027	8.51506	8.42379	8.21883	8.57077	8.38417	8.48843	8.54865
ENSDARG00000010981	zdhhc3a	Turquoise (M1)	9.16456	9.02497	9.02303	8.97072	9.04723	7.98681	8.2419	7.70835	8.10982	7.44771	9.2817	9.38006	9.26284	9.19925	8.61774	9.24371	9.22675	8.62574
ENSDARG00000011023	pdlim3a	Turquoise (M1)	4.83168	4.5098	4.82077	4.98364	4.78307	5.2179	5.11696	5.35711	5.76352	5.84164	4.71069	5.14045	4.74046	4.90271	5.08118	4.91247	4.75298	4.78628
ENSDARG00000011026	zgc:92907	Turquoise (M1)	7.28444	7.39876	7.22785	7.45212	7.35297	7.73018	7.6084	7.74662	7.41126	7.71288	7.35494	7.28035	7.29246	7.03421	7.32731	7.1414	7.18725	7.18214
ENSDARG00000011042	pgbd5	Turquoise (M1)	10.8686	10.983	11.1151	10.7917	10.9444	8.92277	9.08127	9.25315	9.35925	8.326	10.4324	10.3577	11.0036	10.8004	10.7676	10.7801	10.8371	10.7725
ENSDARG00000011125	snrpb	Turquoise (M1)	8.44644	8.86767	9.06988	8.95687	8.88099	9.93078	10.1844	9.70166	9.76386	10.301	9.61793	9.14006	9.05054	8.99527	9.18661	9.1681	8.7263	9.25957
ENSDARG00000011141	dpysl5a	Turquoise (M1)	11.9184	11.9752	12.0035	11.9724	12.0004	11.2451	11.8201	11.5851	11.7313	11.3233	12.1293	11.9444	12.1093	12.0573	12.2937	12.3326	12.3484	12.5413
ENSDARG00000011152	rpp14	Turquoise (M1)	7.4797	7.31428	7.62285	7.6385	7.54126	8.26571	8.42468	8.08656	7.94815	8.70446	7.65686	7.24772	7.32842	7.2075	7.3833	7.21404	7.48201	7.50884
ENSDARG00000011219	akt2	Turquoise (M1)	11.4362	11.3912	11.4641	11.3347	11.4197	10.8369	10.6996	11.1297	11.1332	10.515	11.2715	11.316	11.2913	11.3102	11.3663	11.2464	11.407	11.2566
ENSDARG00000011222	ccdc28b	Turquoise (M1)	8.29731	8.27504	8.45638	8.42415	8.38692	6.94934	6.71531	7.04395	7.08637	6.51466	8.01306	8.21035	8.34777	8.12656	8.60381	8.35274	8.41687	8.47647
ENSDARG00000011246	krr1	Turquoise (M1)	7.57309	7.75882	7.62285	8.2011	7.79853	8.32462	8.41176	8.39739	8.37057	8.61789	7.97816	7.94895	7.77389	7.74991	7.76571	7.68225	7.84651	7.83328
ENSDARG00000011259	trpm1a	Turquoise (M1)	6.25245	4.93424	4.96576	5.41337	5.27791	7.38524	6.79914	8.57019	6.85477	8.64966	5.50447	6.25074	6.11331	5.33763	5.08118	5.82332	5.56586	5.33551
ENSDARG00000011272	uqcc2	Turquoise (M1)	7.6417	7.6333	7.46687	7.67301	7.64327	8.43563	8.48353	8.03609	8.31184	8.94525	8.08509	7.49669	7.69392	7.48501	7.26901	7.24633	7.26693	7.36507
ENSDARG00000011317	adra1ba	Turquoise (M1)	10.7818	10.9519	11.0295	10.886	10.9169	8.98136	9.13723	9.41341	9.41401	8.30396	9.25291	10.2358	10.7597	10.6556	10.3387	10.1617	10.4658	10.4412
ENSDARG00000011333	arhgap33	Turquoise (M1)	11.8085	12.0242	11.9496	12.003	11.9338	10.0223	10.1447	10.4573	10.4423	9.62391	11.1608	11.4244	11.5967	11.6536	11.7481	11.7886	11.8865	12.0166
ENSDARG00000011360	nfatc2ip	Turquoise (M1)	8.04696	7.9	8.0246	8.27005	8.06598	8.81264	8.79346	8.68248	8.56982	8.73439	7.84606	7.95397	8.29025	8.00079	8.07357	8.05194	8.11	8.17936
ENSDARG00000011371	zgc:64106	Turquoise (M1)	5.02199	5.34046	4.89714	5.05986	5.10212	6.35922	6.46253	6.47444	5.81822	6.66505	5.43626	4.92525	4.74046	4.97182	4.81693	4.16044	4.92193	5.28348
ENSDARG00000011473	calcrla	Turquoise (M1)	10.2155	10.1154	10.1219	10.18	10.1454	8.23093	8.04358	8.69226	8.73841	8.19797	9.09268	9.70023	9.75238	9.61728	9.94177	9.84472	9.8842	9.83229
ENSDARG00000011487	gnaq	Turquoise (M1)	9.90147	10.068	10.1657	9.94975	10.0458	8.9497	9.31871	9.25095	9.76542	8.85734	9.69484	9.63013	10.0615	9.85152	9.95095	9.97476	9.75901	9.90613
ENSDARG00000011506	lpcat1	Turquoise (M1)	7.072	6.86123	6.88105	7.12883	6.98677	7.92277	7.58542	7.2006	7.45098	7.7721	7.30717	7.00499	7.39769	6.93291	7.13153	7.28309	7.34233	7.40486
ENSDARG00000011549	c1ql4a	Turquoise (M1)	6.67622	6.79258	6.41597	6.5253	6.6132	5.34661	5.63558	5.69866	5.58171	5.38092	6.30589	5.8959	6.23784	6.06144	6.7909	6.48585	6.77239	6.64075
ENSDARG00000011553	atp5pb	Turquoise (M1)	11.2244	11.2226	11.2403	11.3513	11.2997	12.3404	12.4167	12.1079	12.1793	12.8458	11.6645	11.3391	11.2941	11.3471	11.2213	11.0208	11.0636	11.0023
ENSDARG00000011570	pou6f1	Turquoise (M1)	9.15461	9.01912	9.21126	9.11793	9.154	8.43944	8.87726	8.90071	8.70624	8.68755	9.095	8.97515	9.36473	9.05955	9.32308	9.26331	9.20944	9.35561
ENSDARG00000011582	sox5	Turquoise (M1)	12.9023	12.7603	12.886	12.4961	12.7719	11.5277	11.2549	11.9871	11.9929	11.1586	11.9152	12.8857	12.7016	12.7617	12.7713	12.7899	12.9979	12.9828
ENSDARG00000011597	atxn2l	Turquoise (M1)	10.8927	10.9303	11.0387	10.9796	10.9559	11.0514	11.2537	11.7648	11.6622	11.4656	11.1357	11.0815	10.9946	11.0618	10.893	10.8845	10.9418	10.9934
ENSDARG00000011600	epha4b	Turquoise (M1)	11.3495	11.6957	11.6735	11.5177	11.567	8.91732	9.15283	9.39757	9.78862	8.52956	10.8748	11.1176	11.1527	11.5221	11.2091	11.7996	11.5895	11.7526
ENSDARG00000011648	snrpd1	Turquoise (M1)	8.41894	8.31868	8.60182	8.28678	8.43012	9.50686	10.1473	9.30504	9.28721	9.99977	8.89383	8.51166	8.63389	8.51521	8.51229	8.59506	8.55267	8.63406
ENSDARG00000011665	aldoaa	Turquoise (M1)	12.5895	12.6706	12.8332	12.5495	12.6967	13.0213	12.9269	13.3382	13.259	13.0548	12.8653	12.745	12.7942	12.7327	12.6435	12.5766	12.6309	12.5925
ENSDARG00000011672	sema3b	Turquoise (M1)	7.81277	7.62556	8.0246	7.82637	7.83483	6.64599	7.10209	6.99115	7.25819	6.46605	7.84606	7.83371	7.78679	7.83238	7.96119	7.8411	7.44837	8.07917
ENSDARG00000011673	si:ch211-246m6.5	Turquoise (M1)	4.83168	4.85417	4.73353	4.53257	4.67012	6.75056	7.56989	6.52081	6.22374	7.91312	5.43626	5.38679	5.1522	4.90271	4.54163	4.95218	4.75298	5.28348
ENSDARG00000011703	clocka	Turquoise (M1)	10.9154	10.7999	11.0556	11.0349	10.8957	9.09667	9.27425	9.49943	9.82048	8.75725	10.3397	10.4797	10.7343	10.7016	11.2617	11.4668	11.4065	11.3395
ENSDARG00000011727	b9d1	Turquoise (M1)	7.67946	7.74462	7.70483	7.7797	7.73844	8.46583	8.544	8.25481	8.22352	8.29951	7.82374	7.63497	7.81855	7.81377	7.9091	7.86536	7.61671	7.62262
ENSDARG00000011740	u2af2b	Turquoise (M1)	10.7236	10.7706	10.7494	10.6356	10.7436	11.1631	11.3498	11.0597	11.0872	11.1798	10.7908	10.8545	10.7343	10.6338	10.7104	10.7573	10.8127	10.8133
ENSDARG00000011764	ints13	Turquoise (M1)	8.71406	8.83803	8.95808	8.99463	8.89132	9.53023	9.48603	9.19245	9.31731	9.6433	8.93327	8.82483	8.88735	8.95921	8.97586	8.84462	8.83032	8.92236
ENSDARG00000011783	stag2a	Turquoise (M1)	11.0529	11.1006	11.1524	11.1342	11.1242	10.6835	10.879	10.7726	10.6907	10.4037	10.8768	11.0185	10.9891	10.9638	11.1011	11.0538	11.1962	11.0916
ENSDARG00000011809	mical1	Turquoise (M1)	10.7236	10.649	10.8638	10.5792	10.7483	7.52912	7.87125	7.94049	8.19593	7.26643	9.91024	10.1015	10.5188	10.5626	10.4084	10.4085	10.6428	10.4269
ENSDARG00000011837	zgc:100846	Turquoise (M1)	9.89352	9.89833	10.1268	9.77946	9.95693	8.79789	8.52413	8.94774	9.02062	8.37333	9.26532	9.56299	9.73098	9.81632	9.95461	9.52914	10.0123	9.75827
ENSDARG00000011841	atp5l	Turquoise (M1)	10.4866	10.7047	10.7542	10.5275	10.6505	11.7126	11.5146	11.4635	11.3524	12.1299	11.1215	10.7506	10.745	10.5828	10.6349	10.4352	10.3812	10.2693
ENSDARG00000011845	chn2	Turquoise (M1)	9.17445	9.51336	9.17838	9.95324	9.42662	7.65972	8.25645	8.16379	8.22807	7.45579	8.84503	9.28998	8.9628	9.38627	9.35111	9.08243	9.21688	9.35561
ENSDARG00000011855	aak1a	Turquoise (M1)	10.1503	10.2236	10.2829	10.1331	10.1397	7.72391	8.12518	8.35279	8.54091	7.71288	9.60822	9.57926	9.86397	9.88144	9.90633	10.003	10.0627	10.0134
ENSDARG00000011885	mrpl19	Turquoise (M1)	8.15775	8.17828	8.10705	8.28678	8.21633	8.95236	9.0867	8.64937	9.03364	9.21648	8.65673	8.0879	8.24902	8.21883	8.32673	8.11391	8.19309	8.21311
ENSDARG00000011941	bmpr2a	Turquoise (M1)	11.4079	11.5272	11.5049	11.4539	11.4682	9.88552	10.5537	10.3839	10.3754	9.65202	11.0888	11.1204	11.3367	11.2461	11.4848	11.4035	11.4711	11.457
ENSDARG00000011973	slc35d1a	Turquoise (M1)	8.26058	7.85448	7.89124	8.08464	8.04138	8.73424	8.64315	8.56665	8.45826	8.61431	7.98822	7.78374	8.1579	7.69667	8.17146	8.03373	8.19309	8.13895
ENSDARG00000011999	ybey	Turquoise (M1)	5.41727	5.72527	5.55702	5.36297	5.55465	6.01352	6.33485	6.11467	5.94488	6.72081	5.53699	5.58372	5.73304	5.4587	5.39077	5.58068	5.56586	5.33551
ENSDARG00000012002	slc38a7	Turquoise (M1)	8.87232	8.83803	8.49891	9.01147	8.82461	9.90077	9.72379	9.69032	9.58987	9.81786	9.3159	9.11348	8.9908	8.65714	8.89052	8.82187	8.87494	8.75335
ENSDARG00000012044	polr3gla	Turquoise (M1)	5.36201	5.2927	5.23972	5.59345	5.37886	6.07807	6.08174	5.83666	5.89581	5.89451	5.84299	5.52209	5.42526	5.33763	5.4422	5.43585	5.27513	5.33551
ENSDARG00000012051	mettl21a	Turquoise (M1)	6.0536	5.7884	5.93122	5.88418	5.92987	6.35922	6.25589	6.17544	6.14432	6.49865	6.02412	5.94072	5.99925	5.60083	5.66728	5.70845	6.12808	6.05006
ENSDARG00000012060	thbs3b	Turquoise (M1)	5.17407	5.00613	5.52234	5.36297	5.27791	4.88191	4.99249	4.95637	4.89229	4.49568	5.47093	5.42232	5.34264	5.24767	5.15227	5.52102	5.56586	5.56143
ENSDARG00000012126	zgc:109965	Turquoise (M1)	5.17407	4.85417	4.73353	5.30984	5.0344	5.84823	6.08174	5.43489	6.10267	5.94515	5.15154	5.34994	5.6717	5.33763	5.33655	5.09273	5.22554	4.96431
ENSDARG00000012135	fbxl2	Turquoise (M1)	9.66502	9.92047	10.0588	9.81823	9.86918	8.77398	8.85199	8.95859	9.24532	8.3084	9.26532	9.70321	9.6872	9.77865	9.65304	9.83516	9.9392	9.89581
ENSDARG00000012137	cyp46a1.1	Turquoise (M1)	5.51956	5.93284	5.41085	5.74796	5.66978	6.27214	6.74383	6.45861	6.36927	7.13112	5.47093	5.72422	5.25234	5.86666	5.98563	5.59986	6.15039	5.84684
ENSDARG00000012177	rab4b	Turquoise (M1)	9.96356	10.0638	10.0355	10.059	10.0443	9.21679	8.8488	9.28795	9.44939	8.99003	9.56372	9.59695	9.8069	9.78341	9.88156	9.98894	10.0859	9.78834
ENSDARG00000012184	zgc:162872	Turquoise (M1)	9.78379	9.97739	10.0511	10.0179	9.96347	8.25277	8.38554	8.40932	8.66331	7.69258	9.4596	9.82826	9.87001	9.78974	9.86222	9.89078	10.0433	9.95002
ENSDARG00000012196	fer	Turquoise (M1)	9.3504	9.46468	9.49294	9.25714	9.3687	7.83844	7.89007	8.04633	8.45439	7.66506	9.12936	9.38006	9.3583	9.40288	9.66649	9.49641	9.41321	9.34553
ENSDARG00000012204	CDK18	Turquoise (M1)	10.0466	10.4372	10.3424	10.4919	10.3375	8.23533	8.26127	8.53798	9.14816	8.15918	9.95814	9.45956	10.107	10.2157	10.1086	10.1071	10.102	9.77901
ENSDARG00000012222	nup35	Turquoise (M1)	8.18416	7.95031	8.18975	7.75578	8.03516	8.90361	9.221	8.4713	8.69972	8.82371	8.61204	7.98374	8.08162	8.1807	8.05316	8.10231	8.2329	7.97142
ENSDARG00000012234	psme3	Turquoise (M1)	9.36774	9.29825	9.24567	9.26558	9.32113	10.3416	10.5409	9.90581	10.3434	10.6166	9.95176	9.46132	9.33229	9.58308	9.38675	9.10723	9.34013	9.30968
ENSDARG00000012248	rgma	Turquoise (M1)	11.3538	11.2239	11.7605	11.5743	11.5006	10.4139	10.2366	10.5209	10.8811	10.3252	10.9745	10.9694	11.276	11.2148	11.7476	11.5325	11.7299	11.7271
ENSDARG00000012325	zgc:110269	Turquoise (M1)	7.55286	7.64866	7.50559	7.81098	7.64327	8.38516	8.48353	8.38133	8.2595	8.80817	7.62489	7.62236	7.70076	7.52383	7.9091	7.56836	7.872	7.58857
ENSDARG00000012340	ptpn11b	Turquoise (M1)	11.946	11.7328	11.768	12.0732	11.8925	10.2601	10.197	10.5922	10.6278	9.81165	10.9663	11.4903	11.8083	11.6601	11.3351	11.1473	11.7561	11.3152
ENSDARG00000012347	nacad	Turquoise (M1)	13.1735	13.2472	13.2323	13.3836	13.2628	12.272	12.3939	12.8204	12.8521	12.288	13.2344	13.3232	13.6672	13.386	13.1375	13.113	13.2146	13.1581
ENSDARG00000012367	trim46a	Turquoise (M1)	10.7403	10.8908	10.9322	11.0125	10.8922	9.68236	9.84389	10.0969	10.1299	9.23752	10.0192	10.6223	10.6838	10.809	10.7975	10.7129	10.7535	10.901
ENSDARG00000012368	ttc21b	Turquoise (M1)	9.9192	9.89514	9.96427	10.0735	9.96997	9.38201	9.49218	9.57004	9.83541	9.04941	9.76349	9.72384	9.77025	9.94941	9.91198	9.82991	9.83188	9.92317
ENSDARG00000012388	cox4i1l	Turquoise (M1)	5.65667	5.55008	6.00301	5.94687	5.7742	7.96048	5.79384	7.11466	6.29854	7.37285	6.8959	4.98497	5.03879	5.66549	5.33655	5.24015	4.99273	5.03884
ENSDARG00000012389	adar	Turquoise (M1)	11.575	11.6557	11.7002	11.7328	11.6719	11.0483	11.0552	11.4753	11.2464	10.6657	11.2674	11.7637	12.2156	11.7337	11.5908	11.5592	11.6461	11.5743
ENSDARG00000012407	mgat1a	Turquoise (M1)	8.01786	7.65627	7.59443	7.89362	7.79853	8.59097	8.59062	8.43288	8.32038	8.78293	8.1802	7.80617	7.63085	7.66929	7.45811	7.67833	7.63174	7.36507
ENSDARG00000012432	fam76b	Turquoise (M1)	9.94636	10.0322	10.001	9.90002	9.98611	10.1144	10.6428	10.1733	10.6725	10.5463	9.8702	9.89216	9.99404	9.87104	9.86417	9.71323	9.87953	9.85555
ENSDARG00000012449	si:ch211-169p10.1	Turquoise (M1)	8.87636	9.00437	8.96911	7.98549	8.69692	6.56189	6.25589	6.85556	6.64778	5.9201	7.91628	8.7288	8.52695	8.72813	8.89052	8.96444	8.95727	8.65464
ENSDARG00000012453	rnls	Turquoise (M1)	7.838	7.67138	7.55071	7.82637	7.73075	8.54222	8.23702	8.51609	8.47747	8.77015	8.06148	7.76096	7.89198	7.81377	8.19026	7.99346	7.96374	7.99751
ENSDARG00000012468	aacs	Turquoise (M1)	10.3896	10.4173	10.4217	10.3176	10.393	8.37723	8.76327	8.88089	9.19987	8.44755	10.6355	10.3502	10.7958	10.4191	10.309	10.1851	10.351	10.4305
ENSDARG00000012495	mphosph10	Turquoise (M1)	8.27293	8.194	8.14656	8.24172	8.25425	8.69656	8.71502	8.45988	8.46598	8.78293	8.48674	8.1807	8.13795	8.44465	8.26308	8.11391	8.33242	8.30984
ENSDARG00000012519	hcfc1b	Turquoise (M1)	12.0609	12.2492	12.2896	12.0923	12.1787	11.4393	11.4697	11.6098	11.8948	11.4582	12.2165	12.2597	12.1302	12.2344	12.2453	12.4052	12.3775	12.4865
ENSDARG00000012534	slc6a6a	Turquoise (M1)	11.8491	11.5303	11.6325	11.5136	11.6304	9.36011	9.48808	9.7097	9.93719	8.86036	10.8079	11.5912	11.432	11.2808	11.7183	11.6006	11.7705	11.5132
ENSDARG00000012553	rap1aa	Turquoise (M1)	9.52532	9.28124	9.30561	9.51494	9.4384	9.97467	9.9503	9.8326	9.82348	10.1637	9.66862	9.68077	9.46389	9.44759	9.54072	9.37078	9.65696	9.5828
ENSDARG00000012563	pdss2	Turquoise (M1)	7.56301	7.4436	7.45108	7.38061	7.47817	8.40867	8.42039	8.18246	8.24163	8.62145	7.66317	7.40379	7.61645	7.29124	7.245	7.44452	7.26693	7.36507
ENSDARG00000012572	polr3f	Turquoise (M1)	7.59303	7.57016	7.52833	7.78758	7.63504	8.29126	8.69739	8.16848	8.32038	8.29505	7.51743	7.38145	7.62367	7.65539	7.59683	7.47651	7.33313	7.68836
ENSDARG00000012581	AL590149.1	Turquoise (M1)	8.97772	8.77338	8.81255	8.28123	8.73567	10.259	11.1108	10.9087	10.3476	10.6879	9.16291	8.59418	9.32791	8.54549	9.07335	8.64378	9.50724	9.02702
ENSDARG00000012588	ptdss1a	Turquoise (M1)	11.0934	11.2099	11.2098	11.2697	11.1736	10.5298	9.92026	10.6417	10.6088	10.3164	10.8149	10.9166	11.02	11.1244	11.0144	11.0579	11.1393	10.9425
ENSDARG00000012603	eif3ja	Turquoise (M1)	8.74978	8.86767	8.57677	8.82968	8.7734	9.74668	10.2833	9.53245	9.93442	10.4996	9.55532	9.3557	8.95997	9.10341	9.07671	8.4968	8.86233	8.44371
ENSDARG00000012632	zgc:92749	Turquoise (M1)	5.02199	5.2927	5.19157	4.98364	5.16471	5.49549	5.82305	5.66895	5.58171	5.66703	5.19798	5.18641	4.74046	5.24767	4.81693	4.95218	4.75298	5.28348
ENSDARG00000012642	si:ch211-266d19.4	Turquoise (M1)	9.89152	9.90786	9.94067	9.83345	9.88991	8.66113	8.83919	9.1434	9.12159	8.39433	9.80515	9.84988	9.8503	9.91366	9.90065	10.0131	9.98494	10.1074
ENSDARG00000012649	SMAD4 (1 of many)	Turquoise (M1)	8.6061	8.81455	8.97733	8.78727	8.78453	7.79133	7.42189	8.10626	8.15352	7.52648	8.61204	8.6477	8.51927	8.69138	8.79163	8.83241	8.7088	8.92913
ENSDARG00000012672	gtf2e2	Turquoise (M1)	9.28805	9.43861	9.37771	9.42233	9.40517	9.99934	9.9503	9.72881	9.80994	10.282	9.38954	9.46307	9.43566	9.48706	9.41358	9.31179	9.46203	9.43855
ENSDARG00000012688	eif1b	Turquoise (M1)	12.1645	12.2253	12.2714	12.446	12.303	12.7907	12.9519	12.5655	12.7813	13.1436	12.2734	12.2402	12.152	12.302	12.0489	11.8428	11.8177	11.8141
ENSDARG00000012723	rbm14a	Turquoise (M1)	11.0707	11.1102	11.1144	11.0985	11.1147	10.4302	10.34	10.6325	10.6062	10.1625	10.8372	11.1523	11.0972	11.0059	11.0118	11.0165	11.1242	11.18
ENSDARG00000012745	poc1bl	Turquoise (M1)	8.44098	8.42454	8.37981	8.61716	8.46285	7.35299	7.73897	7.62172	7.66169	7.00369	8.58915	8.61013	8.43608	8.43659	8.41986	8.3231	8.35513	8.42465
ENSDARG00000012747	rer1	Turquoise (M1)	9.8694	9.62545	9.69731	9.62839	9.72471	10.7246	11.042	10.441	10.6018	11.1326	9.86478	9.7384	9.77025	9.65934	9.54315	9.6048	9.4807	9.57204
ENSDARG00000012776	smarca1	Turquoise (M1)	10.445	10.6038	10.321	10.8321	10.5693	9.66135	9.87712	9.78469	9.74184	9.58251	10.0895	10.2099	10.3237	10.4272	10.6687	10.6034	10.7913	10.5306
ENSDARG00000012801	pfkpb	Turquoise (M1)	9.72002	9.78739	9.73654	9.67138	9.75892	9.34397	8.74623	9.37144	8.90921	8.83603	10.018	9.76425	9.80375	9.95364	9.67981	9.79983	9.81237	9.6722
ENSDARG00000012816	dia1a	Turquoise (M1)	9.12773	9.34111	9.59786	8.4882	9.13674	7.50736	7.60078	8.11601	7.73408	6.76119	8.46535	9.32515	9.36473	9.21345	9.22044	9.32552	9.09292	9.02386
ENSDARG00000012820	nop56	Turquoise (M1)	10.0066	9.84144	9.96013	10.0079	9.9957	11.3664	11.5756	10.7848	11.0696	11.6516	10.5401	10.2203	10.0023	9.93949	9.95278	9.90913	9.91654	9.96325
ENSDARG00000012823	dlgap4b	Turquoise (M1)	9.99362	10.2031	10.2197	10.0973	10.112	8.23093	8.94754	8.60515	8.72563	7.95907	9.48103	9.63947	9.95624	9.9064	10.0721	10.0504	10.0736	10.1118
ENSDARG00000012827	mettl3	Turquoise (M1)	8.41894	8.24014	8.52908	8.55413	8.43955	9.04017	9.04272	8.71484	8.97816	9.32964	8.70313	8.69929	8.47233	8.42848	8.71597	8.51001	8.48019	8.58771
ENSDARG00000012833	foxn3	Turquoise (M1)	10.3022	10.4665	10.5611	10.1666	10.3438	8.53867	8.66872	8.78358	9.30663	8.39433	9.68564	9.73114	10.0309	10.017	10.0449	10.3462	10.2054	10.1339
ENSDARG00000012892	ammecr1	Turquoise (M1)	9.36774	9.52786	9.55826	9.42233	9.46858	8.27	8.4375	8.71804	8.90638	8.00906	9.5126	9.5399	9.28109	9.41521	9.34833	9.39111	9.36267	9.44092
ENSDARG00000012899	ddx49	Turquoise (M1)	8.14436	8.1081	7.80728	7.99232	8.04138	8.41643	8.41176	8.24152	8.31184	8.754	8.09443	8.08332	7.83105	8.10125	8.10695	7.87222	8.14695	8.11533
ENSDARG00000012914	arhgef4	Turquoise (M1)	13.099	13.1057	13.2085	13.0921	13.146	12.6295	12.5679	12.9454	12.8826	12.5163	12.8756	12.8524	12.9767	13.1418	13.1093	13.046	13.054	13.0129
ENSDARG00000012929	eif2d	Turquoise (M1)	8.74536	8.80096	8.69783	8.89287	8.80289	9.49046	9.59086	9.21523	9.08455	9.43859	8.78592	8.88633	8.66899	8.66406	8.73739	8.71768	8.83356	8.6382
ENSDARG00000012945	tnfsf13b	Turquoise (M1)	6.02245	6.01188	6.04865	5.94687	5.98691	8.34508	7.40444	8.0206	7.20323	7.65109	6.92815	7.00499	6.48894	6.01556	6.10405	6.15017	5.93368	6.67437
ENSDARG00000012972	cfl1l	Turquoise (M1)	5.61284	5.7884	5.93122	6.06336	5.87002	7.31161	7.79337	7.22811	7.35369	8.64266	7.34709	5.31165	5.6717	6.5283	5.08118	5.26691	5.17307	5.47689
ENSDARG00000012982	nf1a	Turquoise (M1)	12.7778	12.8649	12.8901	12.8866	12.8498	11.9355	11.9183	12.113	12.0788	11.6559	12.3425	12.6096	12.6455	12.6551	12.8292	12.7999	12.8833	12.8869
ENSDARG00000013004	tdg.1	Turquoise (M1)	9.4323	9.29583	9.39007	9.3098	9.38096	10.0147	9.80989	9.7304	9.90642	9.98741	9.51779	9.58411	9.61354	9.07259	9.56724	9.48977	9.36267	9.59774
ENSDARG00000013005	opcml	Turquoise (M1)	10.348	10.435	10.4988	10.8667	10.5137	9.04767	9.5064	9.22873	9.2205	8.80817	9.90497	9.76282	10.156	10.3067	10.3568	10.3813	10.4956	10.5239
ENSDARG00000013009	ubiad1	Turquoise (M1)	8.78894	8.78379	8.94975	8.76757	8.85659	9.25614	9.41238	9.2332	9.1906	9.30991	8.92547	8.833	8.9908	8.69476	8.7585	8.74956	8.7088	8.65872
ENSDARG00000013016	pole4	Turquoise (M1)	7.78709	7.67888	7.58724	7.59415	7.70742	8.1354	8.4999	7.81422	8.01819	8.61431	7.49634	7.5443	7.60189	7.30918	7.51923	7.60598	7.45686	7.2162
ENSDARG00000013020	dtnbb	Turquoise (M1)	12.1382	12.1791	12.3222	12.1549	12.1731	9.62676	9.84549	9.95263	10.2203	9.25137	11.417	11.8736	11.9044	11.9174	12.2021	11.8371	12.0126	11.8617
ENSDARG00000013044	ndufv2	Turquoise (M1)	9.74012	9.7366	9.85712	9.75369	9.79784	10.5396	10.2499	10.3317	10.4949	10.8361	9.80373	9.65029	9.66306	9.81632	9.45292	9.46291	9.51329	9.24608
ENSDARG00000013072	mmp15b	Turquoise (M1)	9.68128	9.50292	9.76211	9.38406	9.57057	7.97107	8.41176	8.27234	8.1678	7.56428	9.72359	10.0924	9.82721	9.85152	9.67759	10.227	9.8559	9.9731
ENSDARG00000013075	mrpl11	Turquoise (M1)	8.05414	8.18878	8.39218	8.09735	8.21633	9.18768	9.12146	8.855	8.94548	9.38724	8.19762	8.06024	8.20658	8.18552	8.22713	8.05194	8.07207	8.09132
ENSDARG00000013128	pdk1	Turquoise (M1)	10.3082	10.4062	10.4187	10.8667	10.473	8.8814	8.92044	9.10243	9.19756	8.40265	9.90497	10.0417	10.151	10.2343	10.4269	10.1865	10.3018	10.3967
ENSDARG00000013161	zgc:55558	Turquoise (M1)	8.90436	8.66124	8.90162	8.87825	8.85659	9.50141	9.97536	9.12907	9.47822	9.81631	9.4176	9.05648	9.07428	8.74127	8.7793	8.79518	8.8718	8.82771
ENSDARG00000013245	wbp1la	Turquoise (M1)	7.67946	7.73746	7.69149	7.9009	7.76127	7.05416	6.98873	7.16305	7.51979	6.83853	7.86257	7.72609	7.80593	7.95062	7.67933	7.62238	7.66865	7.81136
ENSDARG00000013279	znf76	Turquoise (M1)	7.55286	7.86764	7.97054	7.72324	7.81316	8.27428	8.50802	8.08656	7.92027	8.65314	7.70657	7.93377	7.76087	7.86889	7.83123	7.66653	7.73971	7.88317
ENSDARG00000013317	pygmb	Turquoise (M1)	12.6199	12.4812	12.6692	12.5601	12.6075	11.0954	10.5827	11.3374	11.3178	10.8315	11.7342	12.0362	12.5445	12.4396	12.3981	12.2818	12.4471	12.2335
ENSDARG00000013333	ndufa10	Turquoise (M1)	10.2977	10.1692	10.2595	10.4245	10.3109	11.0815	10.9952	10.9628	10.8911	11.1695	10.4587	10.3039	10.1913	10.0358	10.2069	9.96043	9.95412	10.1044
ENSDARG00000013351	cirbpb	Turquoise (M1)	13.514	13.5125	13.384	13.367	13.4755	14.3359	14.6298	14.3273	14.1893	14.4676	13.9194	13.7245	13.6505	13.6192	13.7857	13.6795	13.686	13.8185
ENSDARG00000013389	gabra4	Turquoise (M1)	10.3201	10.6743	10.6209	10.553	10.5014	8.59097	8.34983	8.75585	9.31091	8.40265	10.0398	9.86455	10.4049	10.4453	10.2298	10.3059	10.3533	10.3087
ENSDARG00000013422	slc8a1a	Turquoise (M1)	8.44644	8.77338	8.85481	8.59943	8.6571	7.36921	7.32316	7.56565	7.62752	6.74786	8.1175	7.80059	7.95613	7.80751	7.93166	8.27747	8.03311	8.41984
ENSDARG00000013443	atp6v1ba	Turquoise (M1)	11.6792	11.6108	11.8256	11.8232	11.7636	12.1802	12.0322	11.826	11.7448	12.2283	11.7767	11.5452	11.678	11.6024	11.508	11.5366	11.5374	11.5711
ENSDARG00000013477	gata1a	Turquoise (M1)	6.11366	5.2927	5.65489	7.26036	5.95872	9.36212	8.3362	10.1745	9.75131	9.15884	6.806	6.36583	6.85812	5.41994	5.33655	5.63724	7.05852	6.29281
ENSDARG00000013478	rrp15	Turquoise (M1)	7.072	6.98905	6.74301	7.11624	7.02549	7.94444	8.0658	7.61483	7.75952	8.18355	7.15326	6.95499	6.83302	6.70481	7.09156	6.91793	7.29568	7.02411
ENSDARG00000013491	map3k9	Turquoise (M1)	8.98148	9.17468	9.26369	9.03472	9.12512	7.69858	8.25162	8.09151	8.2946	7.35567	8.41044	8.65694	9.06378	9.01702	8.88286	9.10433	9.02669	8.83132
ENSDARG00000013492	zbtb34	Turquoise (M1)	8.52591	8.51064	8.64031	8.59048	8.47207	7.36112	7.77996	7.873	7.93707	7.25718	8.45454	8.4738	8.41554	8.65367	8.61311	8.62974	8.6513	8.66279
ENSDARG00000013500	abca2	Turquoise (M1)	13.0433	13.1507	13.193	13.3595	13.2018	12.196	12.9387	12.6247	12.5818	11.946	12.9908	13.2454	13.2819	13.3457	13.3167	13.116	13.4417	13.1333
ENSDARG00000013647	cntn3a.2	Turquoise (M1)	11.3553	11.4064	11.4004	11.2864	11.2644	8.90361	9.07036	9.36738	9.4552	8.49109	10.2747	10.8357	11.1724	11.0133	11.2491	11.2843	11.511	11.5064
ENSDARG00000013659	brox	Turquoise (M1)	10.6861	10.6992	10.8173	10.7219	10.7559	9.27966	9.18606	9.64911	9.79321	9.08596	10.4084	10.6379	10.5826	10.5431	10.5553	10.5185	10.6881	10.6021
ENSDARG00000013669	napba	Turquoise (M1)	13.2001	12.8454	12.8603	12.9722	12.9847	10.2319	10.6943	10.7486	11.2142	10.2865	12.5071	12.282	13.0779	12.5589	12.6944	12.5723	13.1367	12.4807
ENSDARG00000013694	stimate	Turquoise (M1)	8.84781	8.84798	8.91023	8.87088	8.89132	8.35319	8.52413	8.63252	8.88355	8.16409	8.71827	8.7491	8.81401	8.72813	8.70731	8.83241	8.93637	8.87756
ENSDARG00000013708	usp9	Turquoise (M1)	13.3773	13.4735	13.476	13.515	13.4698	12.7324	13.0974	12.8198	13.1907	12.6438	13.49	13.4508	13.3388	13.3932	13.4444	13.4486	13.4055	13.5059
ENSDARG00000013729	srsf6a	Turquoise (M1)	10.4746	10.6203	10.755	10.437	10.6063	11.1428	11.1495	11.0343	11.0696	11.5948	10.6138	10.6526	10.4788	10.6382	10.7061	10.5952	10.613	10.65
ENSDARG00000013730	slc4a4a	Turquoise (M1)	12.0136	11.6258	12.181	11.9425	11.9642	11.0021	10.7577	11.5254	11.5031	10.833	11.8934	12.318	11.9921	12.0355	12.2438	12.1123	12.046	12.0994
ENSDARG00000013775	si:dkey-246g23.4	Turquoise (M1)	4.16044	5.2927	4.89714	4.80149	4.78307	6.05692	5.40971	6.11467	5.27824	6.23184	4.71069	5.14045	5.20368	4.7379	4.91637	4.98981	4.99273	5.2284
ENSDARG00000013802	pcid2	Turquoise (M1)	7.96548	7.77289	8.1755	7.93676	7.98443	8.45458	8.3767	8.2636	8.22807	8.36057	8.1037	8.03203	7.96749	7.83238	8.146	7.94229	7.97554	8.17366
ENSDARG00000013804	capns1b	Turquoise (M1)	10.4286	10.1318	10.1835	10.2483	10.2679	10.9491	11.092	10.4866	10.7359	11.4916	10.8558	10.2409	10.2699	10.163	10.102	9.99754	10.094	9.60409
ENSDARG00000013813	fam219ab	Turquoise (M1)	10.9891	11.0267	10.9704	11.0341	11.0417	9.40942	9.5639	9.69195	9.98618	9.13661	10.3668	10.5687	10.8005	10.7831	10.8025	10.5283	10.7294	10.5059
ENSDARG00000013822	anapc16	Turquoise (M1)	8.18416	8.11912	8.06642	8.02598	8.13734	8.67412	8.77341	8.54159	8.41907	9.14653	7.932	8.0225	7.96749	7.88086	8.13956	7.85847	7.75351	7.68836
ENSDARG00000013828	snx13	Turquoise (M1)	10.527	10.4481	10.6485	10.6731	10.5412	9.67432	9.99134	9.9688	9.96189	9.16129	10.2416	10.5622	10.2607	10.2573	10.2947	10.1783	10.4438	10.2178
ENSDARG00000013856	amy2a	Turquoise (M1)	4.93326	5.0718	4.16044	5.30984	4.87758	8.32462	7.19678	7.8082	5.13429	8.09383	6.16339	4.47571	5.89974	4.16044	5.58279	4.59788	4.75298	4.78628
ENSDARG00000013861	armc1	Turquoise (M1)	10.1011	10.1154	10.1415	10.0638	10.1281	8.9336	8.96237	9.22649	9.416	8.63209	9.88501	10.0132	10.0536	10.0021	10.0066	10.01	10.1061	10.1163
ENSDARG00000013863	fam133b	Turquoise (M1)	8.46269	8.50645	8.46811	8.59048	8.57399	9.57239	9.78008	9.16462	9.08455	9.9984	8.3338	8.4738	8.36502	8.3956	8.34919	8.54464	8.52892	8.49028
ENSDARG00000013892	sorl1	Turquoise (M1)	11.6884	11.8308	11.7715	11.9056	11.8079	11.1056	11.1796	11.4568	11.4376	10.992	11.5851	11.4302	11.5306	11.6225	11.838	11.7685	11.6716	11.6236
ENSDARG00000013921	frya	Turquoise (M1)	13.557	13.4822	13.4634	13.6526	13.5428	12.2252	12.5572	12.6332	12.1557	11.8914	12.5302	13.2644	13.4643	13.3195	13.2753	13.126	13.3165	13.1991
ENSDARG00000013938	psmb3	Turquoise (M1)	9.77516	9.60802	9.60494	9.83912	9.73238	11.0644	10.8562	10.8911	10.911	11.4661	10.8015	10.3069	9.88051	9.89177	9.84262	9.72458	9.80745	9.77338
ENSDARG00000013950	pdf	Turquoise (M1)	7.23427	7.22439	6.13522	5.88418	6.57837	7.84997	7.37787	7.75915	7.0659	7.83513	7.02063	7.03414	6.91896	6.84865	6.01631	6.18561	6.59544	6.70718
ENSDARG00000013966	psma6b	Turquoise (M1)	8.85603	8.63082	8.61242	8.73953	8.73567	9.82142	9.78176	9.44459	9.499	9.95957	9.30192	8.91996	8.84503	8.8813	8.80386	8.54891	8.66952	8.68297
ENSDARG00000013973	pex3	Turquoise (M1)	8.72307	8.49805	8.59114	8.49301	8.59101	8.96298	8.9113	8.75274	8.78536	8.84521	8.57591	8.53525	8.45633	8.41214	8.43568	8.3231	8.5799	8.50849
ENSDARG00000013976	anxa13	Turquoise (M1)	11.1132	10.9488	10.9962	11.0937	11.0609	12.4386	11.8363	12.1418	12.0326	12.1495	11.908	11.3396	11.0515	11.1505	11.1361	10.7266	10.9655	10.7659
ENSDARG00000014004	eif2b4	Turquoise (M1)	10.2075	10.2338	10.1403	10.3746	10.2613	11.0402	11.2294	10.6994	10.9299	11.3112	10.2644	10.1942	10.2399	10.2945	10.2932	10.1838	10.264	10.2356
ENSDARG00000014041	smarcad1a	Turquoise (M1)	10.043	9.65216	9.67224	9.68403	9.77573	10.1203	10.7216	10.6426	10.136	10.595	10.1465	9.59855	9.87302	9.87699	10.0311	9.66887	9.50116	9.73337
ENSDARG00000014047	cldn7b	Turquoise (M1)	6.53529	6.79258	6.91641	6.69004	6.72848	7.31161	7.38678	7.30756	6.56123	7.65809	6.52305	6.62259	6.65753	6.61944	6.31209	6.29711	5.85201	6.72329
ENSDARG00000014058	rab36	Turquoise (M1)	7.59303	7.59417	7.40261	7.71499	7.60165	8.50271	8.35434	8.45222	8.26394	8.89904	7.74275	7.33569	7.70757	7.4288	7.83921	7.45832	7.80739	7.51792
ENSDARG00000014085	atp6v1e1a	Turquoise (M1)	8.69127	8.43338	8.42062	8.66054	8.58253	9.4627	9.45911	8.93955	8.57695	9.32964	8.24865	8.45978	8.17757	8.33618	8.37679	8.47677	8.28589	7.95153
ENSDARG00000014103	dkk1a	Turquoise (M1)	4.5503	5.0718	4.16044	4.53257	4.67012	6.7878	7.18657	5.5415	7.17492	7.53412	5.50447	5.14045	4.74046	4.49531	4.81693	4.66491	4.75298	4.78628
ENSDARG00000014138	acot8	Turquoise (M1)	7.29671	7.18252	7.50559	7.27173	7.33268	8.36926	7.91479	8.25039	8.14393	8.03609	7.77802	7.28839	7.11817	7.08745	7.29262	7.44452	7.32386	6.78589
ENSDARG00000014169	CABZ01041610.1	Turquoise (M1)	8.1776	8.52725	8.73387	8.67754	8.50835	5.38594	5.56546	5.81034	6.31658	5.60232	6.82903	7.52409	7.97876	8.07028	7.42653	7.65063	7.81399	7.07467
ENSDARG00000014171	bloc1s1	Turquoise (M1)	7.3797	7.38042	7.48249	7.54837	7.46892	8.5244	8.3678	8.09645	7.93707	8.95093	7.77802	7.40379	7.22723	7.7758	7.17038	7.50337	7.30514	7.62262
ENSDARG00000014181	foxp1b	Turquoise (M1)	8.35652	8.55588	8.54392	8.16533	8.38692	7.9173	7.50601	7.19131	7.72119	6.81323	8.89915	8.30365	8.13795	8.32312	8.46168	8.98033	8.55267	8.62574
ENSDARG00000014218	mecp2	Turquoise (M1)	9.34458	9.63505	9.78568	9.46205	9.56413	7.09397	7.20691	7.52945	7.8745	6.96992	9.35319	9.44897	9.43159	9.56659	9.43469	9.60582	9.62377	9.53925
ENSDARG00000014222	zgc:86598	Turquoise (M1)	10.2931	10.2871	10.4307	10.2708	10.3375	10.3446	10.8086	10.5218	10.7303	10.7363	10.3905	10.3156	10.1829	10.4272	10.2522	10.1035	10.2688	10.2411
ENSDARG00000014230	dlst	Turquoise (M1)	10.3839	10.4751	10.7317	10.3811	10.5236	11.0295	11.0273	10.9655	11.2011	11.4035	10.7743	10.5383	10.6036	10.5375	10.3787	10.3633	10.3306	10.4305
ENSDARG00000014233	sept8b	Turquoise (M1)	7.82964	7.20361	7.32664	7.54837	7.53241	6.61853	6.31555	6.99115	6.28024	6.67921	7.13507	7.63497	7.70076	7.62006	7.69703	7.45832	7.58615	7.0622
ENSDARG00000014244	rbmx	Turquoise (M1)	11.0449	11.1054	10.8894	10.9379	11.02	11.3847	11.3156	11.2792	11.1854	11.3926	10.8036	10.9981	11.0281	11.0813	10.9128	10.8097	10.8977	10.8387
ENSDARG00000014280	dlgap1a	Turquoise (M1)	11.6682	11.9304	12.2487	11.5962	11.8255	9.64003	9.4778	10.3107	10.2373	9.14406	10.9381	11.3538	11.8247	11.7609	11.5333	11.8192	11.6047	11.7559
ENSDARG00000014292	med15	Turquoise (M1)	9.02585	8.87741	9.03882	9.13032	9.02552	9.2079	9.51648	9.38958	9.51207	9.71668	9.32581	9.18967	9.09248	9.21345	8.96138	9.06169	8.9924	8.90872
ENSDARG00000014302	brinp2	Turquoise (M1)	12.5098	12.593	12.6843	12.681	12.6096	11.2089	11.479	11.7194	11.6676	10.8246	11.6105	12.0998	12.3779	12.4158	12.1994	12.3269	12.4224	12.2423
ENSDARG00000014313	atp5pf	Turquoise (M1)	10.4491	10.4195	10.6528	10.4823	10.5236	11.6976	11.5106	11.3998	11.3545	12.2218	10.851	10.5114	10.4388	10.5718	10.3882	10.2223	10.1507	10.2178
ENSDARG00000014357	amh	Turquoise (M1)	5.41727	5.18916	5.14064	5.41337	5.27791	6.23561	5.95923	5.75584	5.79119	6.19175	5.19798	4.98497	5.20368	5.37963	5.4422	5.36698	5.45125	5.28348
ENSDARG00000014477	sstr3	Turquoise (M1)	10.1882	10.0102	10.0678	9.70694	9.99251	8.83881	9.49218	9.01163	9.62639	8.71784	9.30793	9.70913	10.1889	9.81321	9.93252	9.7037	10.1764	9.58922
ENSDARG00000014488	ca2	Turquoise (M1)	9.50719	9.5196	9.6312	9.89096	9.66181	7.73018	7.91479	7.93499	8.04939	7.25718	8.75102	8.6477	8.97687	9.15826	9.13271	8.73277	8.83356	8.49028
ENSDARG00000014496	trpv6	Turquoise (M1)	4.83168	4.93424	4.89714	4.16044	4.78307	5.6561	5.32189	4.88852	5.13429	5.29493	4.79455	4.70437	4.74046	4.7379	4.81693	4.59788	4.75298	4.78628
ENSDARG00000014506	tmem126a	Turquoise (M1)	8.24812	8.1081	8.1755	8.18333	8.1942	9.3256	9.63962	9.03998	9.2763	9.65723	8.56255	8.11055	8.13292	8.12656	8.21494	7.83057	8.2524	8.02947
ENSDARG00000014527	pdk3a	Turquoise (M1)	10.2626	10.1889	10.255	10.4332	10.2587	8.33284	8.32705	8.63252	8.89786	8.00359	9.73553	9.93955	9.94341	10.1496	9.97816	9.97792	10.1061	9.90955
ENSDARG00000014536	pfdn1	Turquoise (M1)	8.28517	8.47681	8.11703	8.37808	8.33733	9.02506	9.35287	9.03231	8.74476	9.47249	8.61204	8.23939	8.30373	8.3662	7.99012	8.20074	7.93985	7.99751
ENSDARG00000014550	rfx3	Turquoise (M1)	9.90938	10.1533	10.3571	9.92688	10.1164	8.0827	8.28037	8.68901	8.77299	7.79765	9.65139	9.88955	9.94484	9.96207	10.0804	10.2163	10.143	10.2219
ENSDARG00000014556	serpinb1l3	Turquoise (M1)	7.22145	7.67138	7.93144	7.42191	7.59318	8.80086	9.02587	8.80778	8.90355	9.75607	8.62173	7.93377	7.81855	7.73018	7.34997	7.63859	7.547	7.34474
ENSDARG00000014591	ilf2	Turquoise (M1)	10.9713	10.8294	10.9017	10.8425	10.9135	11.749	11.8942	11.5103	11.8797	12.1333	11.6476	11.1187	11.0588	10.9833	11.124	10.989	11.0671	11.3087
ENSDARG00000014592	dennd1a	Turquoise (M1)	9.88151	9.92673	9.84521	9.99614	9.90016	8.53155	8.5161	8.99592	9.03364	8.36909	9.63874	9.70321	9.64205	9.9295	9.96008	9.88067	9.96447	9.87845
ENSDARG00000014623	si:ch211-212d10.1	Turquoise (M1)	7.55286	7.52088	7.73114	7.82637	7.6837	8.90086	8.02669	8.34867	9.01012	9.27869	8.30998	7.5376	7.53449	7.2075	7.34997	7.19761	7.52298	6.75495
ENSDARG00000014652	ankrd13b	Turquoise (M1)	11.5436	11.3527	11.5242	11.4391	11.4728	10.1589	10.2058	10.5895	10.3413	9.54925	10.6299	10.8329	11.3219	11.38	11.0118	11.2805	11.5009	11.1514
ENSDARG00000014704	pgm2l1	Turquoise (M1)	8.97395	9.07662	8.74995	8.7636	8.90157	9.0576	9.53246	9.09753	9.30234	9.24677	8.92024	8.90454	8.90217	8.86639	8.98663	8.91572	8.8655	8.91896
ENSDARG00000014717	dync1h1	Turquoise (M1)	12.5697	13.1423	13.4019	12.5172	12.9289	10.6429	10.919	11.6505	11.5621	10.2684	13.0611	13.1388	13.1958	13.0427	12.8966	13.2983	13.1239	13.3063
ENSDARG00000014731	cacybp	Turquoise (M1)	9.07241	9.13192	9.07244	9.00812	9.11341	9.2079	9.37298	9.12907	9.56141	9.73978	9.16512	8.89936	8.9486	9.0464	8.98663	8.88905	8.83356	8.78728
ENSDARG00000014775	zgc:113220	Turquoise (M1)	8.67742	8.6423	8.5947	8.7636	8.68113	7.5363	7.45614	7.82021	8.01819	7.38984	8.2776	8.61646	8.56473	8.69476	8.76685	8.75511	8.72282	8.89495
ENSDARG00000014792	lrrc4bb	Turquoise (M1)	11.9979	12.2567	12.3361	12.1037	12.1871	10.9598	10.8938	11.3555	11.4861	10.5731	11.6535	11.9286	12.0544	12.0872	12.1243	12.076	12.1956	12.1243
ENSDARG00000014794	uqcrc2a	Turquoise (M1)	9.62955	9.43861	9.93365	9.48874	9.65577	10.2054	9.89577	10.0292	10.1834	10.1999	9.79377	9.4805	9.58446	9.52737	9.57677	9.26071	9.47243	9.37308
ENSDARG00000014854	reep1	Turquoise (M1)	10.1652	10.1113	9.97933	10.2412	10.0642	7.7488	8.12518	8.09645	8.08495	7.16123	9.43235	9.87776	9.83649	9.92088	10.0636	10.2611	9.83026	9.96654
ENSDARG00000014871	syngr3a	Turquoise (M1)	11.379	11.4086	11.8489	12.1305	11.7228	10.7592	11.2458	10.9601	11.3498	10.4505	11.8098	11.1182	11.5042	11.6304	11.977	11.3801	11.7684	11.6823
ENSDARG00000014875	abi2b	Turquoise (M1)	11.1132	11.195	11.3897	11.2802	11.271	10.8955	10.5885	11.0324	10.9292	10.5547	11.1221	11.1446	11.149	11.2171	11.0601	11.0428	11.1536	11.1059
ENSDARG00000014891	robo2	Turquoise (M1)	12.0873	12.3285	12.3747	12.1224	12.2331	11.6231	11.8286	12.0384	12.2282	11.4873	11.9649	12.2057	12.195	12.1911	12.4168	12.3671	12.6061	12.5418
ENSDARG00000014898	ncbp2	Turquoise (M1)	7.4797	7.85448	7.91435	7.9009	7.82042	8.79195	8.4586	8.31947	8.50018	8.77655	7.83494	7.91843	7.84345	7.68304	7.99012	7.76204	7.75351	8.12127
ENSDARG00000014914	lamp2	Turquoise (M1)	11.518	11.1655	11.5218	11.5515	11.4601	12.0002	12.1694	12.0198	11.9473	11.7761	11.7423	11.4324	11.4427	11.3244	11.288	11.2598	11.4696	11.3235
ENSDARG00000014915	ndufab1b	Turquoise (M1)	9.1141	9.04528	9.35267	9.11793	9.1851	10.0819	10.3056	9.79077	10.0087	10.6725	9.26943	8.99227	9.07951	8.88426	9.27414	8.94191	8.90598	8.98542
ENSDARG00000014927	uts1	Turquoise (M1)	9.80515	9.91732	10.009	9.84664	9.97483	10.4864	12.0856	11.0013	11.6551	11.4168	10.1948	8.97022	10.1498	9.34604	9.57201	9.33172	9.75901	9.21873
ENSDARG00000014939	KCNN2	Turquoise (M1)	7.53234	7.69375	7.53583	7.67301	7.60165	6.7878	6.42729	7.00187	7.18442	6.86337	7.30717	7.15386	7.28333	7.29124	7.36117	7.67047	7.53904	7.58857
ENSDARG00000014956	diablob	Turquoise (M1)	6.9678	7.31428	7.12157	7.45212	7.23758	8.16796	8.12518	7.92946	7.6818	8.17385	7.78959	7.5376	7.21766	7.42058	7.3833	7.2622	7.19746	7.29261
ENSDARG00000014962	ppp3cca	Turquoise (M1)	11.8645	11.8404	12.1091	12.2523	12.0357	10.7744	10.4022	11.0052	11.2016	10.487	11.3168	11.8154	11.6524	11.8072	11.7747	11.6376	11.9619	11.7483
ENSDARG00000014963	triap1	Turquoise (M1)	6.75062	6.79258	6.83245	6.99746	6.87791	7.33658	7.48959	7.06452	7.30241	7.63699	6.82903	6.52852	6.75482	6.84865	6.80759	6.76867	6.85294	6.84576
ENSDARG00000014976	lims2	Turquoise (M1)	5.02199	5.38599	5.71567	5.94687	5.5134	8.02797	7.10209	7.43074	6.26168	7.47181	4.71069	5.27176	5.60682	5.53213	5.78324	5.61871	5.27513	5.38488
ENSDARG00000014994	tbp	Turquoise (M1)	8.776	8.74172	8.67442	8.66054	8.73567	9.16719	9.18606	8.91749	8.95919	9.49012	8.67857	8.69929	8.56473	8.65367	8.61774	8.5122	8.72978	8.71467
ENSDARG00000015025	l1camb	Turquoise (M1)	12.7177	12.9618	12.9414	12.8834	12.857	10.7097	10.9137	11.1924	11.3141	10.2763	12.7433	12.7133	12.8895	12.8914	12.8512	12.9363	13.0005	12.9724
ENSDARG00000015033	slc23a1	Turquoise (M1)	5.51956	6.08618	5.52234	6.09086	5.7742	7.30318	6.91599	7.52945	6.46871	7.33826	5.91412	5.96253	5.79127	5.66549	5.98563	5.58068	5.32222	6.29281
ENSDARG00000015050	calm3a	Turquoise (M1)	14.1715	14.1146	14.0951	14.2697	14.1969	14.5462	14.7972	14.4969	14.8107	15.1315	13.8448	13.9484	14.0438	14.1854	14.1419	13.7628	14.0179	13.971
ENSDARG00000015053	grip1	Turquoise (M1)	10.4327	10.7619	10.9393	10.4919	10.6536	9.52308	9.73764	9.7161	10.4007	9.74795	10.489	10.0788	10.4539	10.646	10.5815	10.8858	10.6027	10.5161
ENSDARG00000015057	ube2d4	Turquoise (M1)	9.95594	9.89354	9.87188	9.93042	9.91035	8.95768	9.34157	9.22649	9.40202	8.59993	9.53497	9.71651	9.91741	9.97462	9.97456	9.86195	10.0037	9.8732
ENSDARG00000015110	slc18a2	Turquoise (M1)	7.6029	8.47681	8.85778	8.54025	8.32721	6.90508	7.46458	6.70511	7.46656	6.32694	7.68194	7.81725	7.68015	7.78219	8.08701	8.48793	8.13649	8.17936
ENSDARG00000015153	wdr91	Turquoise (M1)	8.94344	9.09344	9.2159	8.95339	9.07165	8.2571	8.68312	8.40535	8.37057	7.69258	9.14063	9.16616	8.88138	8.86939	9.08342	8.89911	9.22675	9.02386
ENSDARG00000015156	fbln2	Turquoise (M1)	8.33901	8.33766	8.47974	8.85604	8.49485	9.97467	11.1934	10.047	10.4703	10.3219	9.20432	8.2435	8.64451	8.73799	9.10004	7.81642	8.60662	8.12127
ENSDARG00000015161	zgc:92664	Turquoise (M1)	8.30334	7.99292	8.02989	8.32508	8.17173	8.63148	8.69027	8.60169	8.38692	8.76693	8.05671	8.35382	8.07113	8.13156	8.1331	8.41258	8.2181	8.21866
ENSDARG00000015164	mknk2b	Turquoise (M1)	12.4779	12.5086	12.6469	12.7155	12.5865	11.7793	11.8447	12.0756	11.9815	11.2091	12.1083	12.3619	12.4232	12.4719	12.3548	12.1755	12.3972	11.9324
ENSDARG00000015174	atp6v0a1b	Turquoise (M1)	13.346	13.3441	13.5365	13.4317	13.4481	12.0972	12.1919	12.4114	12.6551	11.6906	12.8963	13.033	13.2555	13.2219	13.2183	13.1804	13.3474	13.1484
ENSDARG00000015221	nsrp1	Turquoise (M1)	6.98318	7.12835	6.79483	6.96963	7.02549	7.69218	7.54627	7.32462	7.31971	7.60835	6.94924	6.99513	7.04405	7.03421	6.8565	7.02794	7.09183	7.31369
ENSDARG00000015228	ero1a	Turquoise (M1)	8.49991	8.61147	8.36316	8.57242	8.53056	9.47387	9.1241	9.21297	8.90355	9.23983	8.82839	8.08332	8.29925	8.26511	8.26308	8.21964	8.30934	8.30984
ENSDARG00000015290	sacm1la	Turquoise (M1)	10.3334	10.3291	10.3707	10.3759	10.3686	9.73744	9.93986	9.89033	10.2618	9.47446	10.1642	10.0557	10.2235	10.2039	10.1298	10.17	10.1713	10.2329
ENSDARG00000015292	ube2g1a	Turquoise (M1)	10.1486	9.86283	10.0932	10.1469	10.0687	10.618	10.8233	10.5025	10.8681	11.137	10.1319	10.1513	10.0915	10.1422	10.1586	10.0556	10.0859	10.0449
ENSDARG00000015325	u2af1	Turquoise (M1)	9.181	9.09065	9.08263	9.21415	9.1823	9.87433	9.74794	9.6015	9.7114	10.149	9.65139	9.30963	9.34968	9.25749	9.18349	9.09707	9.32873	9.20764
ENSDARG00000015349	mfge8a	Turquoise (M1)	11.3966	10.8649	11.2567	11.1373	11.1939	10.3139	10.1264	10.6008	10.1893	9.82096	10.361	11.2945	11.2299	11.2148	11.4268	11.1964	11.3994	11.4894
ENSDARG00000015374	st3gal3a	Turquoise (M1)	8.57655	8.69471	8.41659	8.63031	8.57827	9.62342	9.43168	9.14102	8.8749	9.31212	8.86692	8.833	8.48815	8.42441	8.46168	8.48793	8.68393	8.42465
ENSDARG00000015385	ndufs3	Turquoise (M1)	9.99176	9.91417	9.94626	10.0411	9.9957	10.5289	10.5419	10.4284	10.4626	10.8924	9.9645	9.66865	9.95197	9.87699	9.94177	9.62008	9.63862	9.83769
ENSDARG00000015394	thoc7	Turquoise (M1)	7.57309	7.56206	7.25549	7.42191	7.47817	8.75272	8.87413	8.56309	8.56624	9.22353	8.01306	7.86607	7.62367	7.59114	7.51923	7.34891	7.52298	7.57993
ENSDARG00000015427	hdac1	Turquoise (M1)	11.6202	11.4849	11.6036	11.6123	11.6056	11.9518	11.9848	11.9778	12.3746	12.3611	11.8814	11.7469	11.5779	11.7378	11.6635	11.6643	11.6202	11.7958
ENSDARG00000015536	sox6	Turquoise (M1)	10.9863	11.2112	11.2127	11.2954	11.1793	10.8541	10.0452	10.3899	10.4097	10.657	11.0136	10.8744	11.1334	11.1742	11.1297	11.2096	11.3596	11.3546
ENSDARG00000015540	psen2	Turquoise (M1)	9.48089	9.66346	9.66209	9.69031	9.63545	9.07971	8.94156	9.21974	9.40001	8.79875	9.66081	9.67321	9.56598	9.52168	9.36492	9.46742	9.49505	9.35058
ENSDARG00000015543	s100a1	Turquoise (M1)	4.16044	4.16044	4.73353	4.16044	4.52177	5.06755	6.05819	4.81301	5.13429	5.38092	4.71069	4.16044	4.74046	4.16044	4.16044	4.59788	4.75298	4.16044
ENSDARG00000015589	ankrd33bb	Turquoise (M1)	5.02199	5.24239	4.89714	5.30984	5.10212	4.48577	4.16044	4.72677	4.49053	4.16044	4.71069	5.23008	5.25234	5.4587	5.33655	5.09273	4.99273	4.78628
ENSDARG00000015638	gemin2	Turquoise (M1)	7.98817	7.90639	7.75698	7.81098	7.88415	8.44324	8.65417	8.29395	8.37467	8.67389	7.932	7.62868	7.83726	7.68987	7.83123	7.66257	7.85931	7.68836
ENSDARG00000015649	rap2c	Turquoise (M1)	10.43	10.459	10.5233	10.4763	10.4991	10.7308	11.0024	10.5117	10.7752	10.9906	10.3416	10.3502	10.3498	10.3618	10.3719	10.2572	10.4679	10.3584
ENSDARG00000015653	tnip1	Turquoise (M1)	12.8731	12.9856	12.8362	12.8523	12.9121	12.1035	11.7121	12.3953	12.4669	12.0612	12.4046	12.7217	12.8477	12.8976	12.6949	12.706	12.7937	12.8652
ENSDARG00000015722	kctd5a	Turquoise (M1)	8.88843	8.72382	8.88133	8.8448	8.85659	9.77102	9.40372	9.40947	9.54151	9.99017	9.34931	9.32708	9.01554	8.86639	8.90194	8.91572	9.08752	9.19647
ENSDARG00000015732	cax2	Turquoise (M1)	9.54068	9.33406	9.27484	9.49832	9.40996	8.5978	8.6867	8.80478	8.68328	8.09383	8.99172	8.91484	9.13574	8.98978	9.2265	9.17226	9.34919	9.51922
ENSDARG00000015747	aarsd1	Turquoise (M1)	8.26676	8.1355	8.12695	7.94382	8.13734	8.69974	8.4586	8.55596	8.71597	8.5854	8.09443	8.06024	8.17757	8.18552	8.13956	7.99973	8.11	8.02314
ENSDARG00000015749	hps3	Turquoise (M1)	8.9162	9.11281	9.23886	9.07693	9.11341	8.66764	8.59443	8.7927	8.86036	8.04677	9.3952	9.12683	9.04788	9.06739	9.38946	9.08537	9.09292	9.25419
ENSDARG00000015765	iah1	Turquoise (M1)	6.78635	6.08618	6.70281	6.29169	6.46811	7.80326	7.55419	7.92946	7.74048	7.54172	7.10733	6.41222	6.71397	6.37876	6.70421	6.45779	6.35443	6.64075
ENSDARG00000015823	vps26b	Turquoise (M1)	9.4323	9.38045	9.35267	9.19659	9.36376	9.64333	9.86455	9.37549	9.70816	9.83636	9.55869	9.46832	9.32791	9.39667	9.34833	9.22518	9.25835	9.31227
ENSDARG00000015835	eif4e2rs1	Turquoise (M1)	8.5914	8.57598	8.74354	8.50735	8.64086	9.17633	8.80996	8.66933	8.88929	9.11404	8.70617	8.72588	8.52312	8.62915	8.83598	8.54035	8.4552	8.48569
ENSDARG00000015851	pnn	Turquoise (M1)	10.4905	10.5651	10.5007	10.5507	10.5821	11.1193	10.8378	10.9621	10.7046	11.4522	10.312	10.2703	10.4459	10.6347	10.4057	10.4789	10.4844	10.4588
ENSDARG00000015860	mtmr9	Turquoise (M1)	10.0942	10.0176	10.1976	10.1978	10.1682	8.27854	8.4586	8.69551	8.88643	8.11932	9.79377	9.85523	9.7831	9.9295	10.0804	9.86452	10.0349	9.978
ENSDARG00000015889	zc3h15	Turquoise (M1)	9.58827	9.4754	9.34846	9.61744	9.549	9.95223	9.87399	9.72088	9.92329	10.1416	9.8318	9.47703	9.6243	9.60656	9.43207	9.28264	9.52733	9.51922
ENSDARG00000015905	lztr1	Turquoise (M1)	11.1653	11.1918	11.2784	11.4228	11.2893	10.5343	10.3468	10.8444	10.7272	10.2058	10.8896	10.8438	10.8849	11.0381	11.2625	11.2032	11.1169	11.0727
ENSDARG00000015930	rwdd1	Turquoise (M1)	8.29731	8.34237	8.1755	8.36763	8.33228	9.60153	9.36631	9.22424	9.40001	9.99703	9.2817	8.78606	8.4523	8.7182	8.38224	8.35518	8.44253	8.50396
ENSDARG00000015931	SNAP91 (1 of many)	Turquoise (M1)	12.7121	12.8953	13.019	12.7751	12.8831	11.682	11.9244	12.0243	12.262	11.4204	12.3416	12.3947	12.8035	12.7455	12.7494	12.7833	12.8327	12.7485
ENSDARG00000015968	rabgef1l	Turquoise (M1)	8.34487	8.63082	8.82779	8.4688	8.53936	7.16102	8.28037	7.57278	7.63442	7.06886	8.15367	8.51166	8.48815	8.54174	8.46682	8.60535	8.62541	8.23518
ENSDARG00000015970	phip	Turquoise (M1)	11.4984	11.6382	11.913	11.6221	11.6528	10.3056	10.428	10.8253	10.5736	9.78015	11.4368	11.5988	11.5621	11.7345	11.5357	11.7732	11.8539	11.6952
ENSDARG00000015978	COX5B	Turquoise (M1)	9.76866	10.0028	9.94207	9.9515	9.9845	11.1999	10.9521	10.8582	10.8246	11.5157	10.0482	9.80632	9.87602	9.83784	9.88732	9.83516	9.90277	9.50344
ENSDARG00000015997	mfsd5	Turquoise (M1)	8.29731	8.28485	8.27685	8.57242	8.37222	8.90636	8.79346	8.73392	8.79151	8.99003	8.50433	8.38755	8.27664	8.25138	8.26308	8.32559	8.08301	8.2889
ENSDARG00000016038	hacd3	Turquoise (M1)	8.8804	8.7699	8.80334	9.00812	8.88099	9.13939	9.51246	9.2901	9.05932	9.13163	8.85875	8.72001	8.7662	8.77038	8.89434	8.81126	8.66226	8.8564
ENSDARG00000016085	mbnl3	Turquoise (M1)	12.7157	12.75	12.8164	12.7242	12.7565	12.2462	12.2282	12.4603	12.3106	12.0314	12.462	12.6081	12.6113	12.5844	12.6892	12.7382	12.9547	12.6339
ENSDARG00000016088	rtn2a	Turquoise (M1)	8.69127	8.58394	8.68115	8.57242	8.63677	7.52912	7.44766	7.89585	7.7783	7.17113	8.38787	8.39125	8.561	8.74127	8.77101	8.84635	8.86233	8.74185
ENSDARG00000016089	bicral	Turquoise (M1)	9.8428	9.8823	10.0289	10.1223	9.95201	9.07971	9.59277	9.2421	9.67534	8.92521	9.91156	10.0417	9.89834	10.1172	10.2903	9.97	10.1611	10.1543
ENSDARG00000016122	ptrhd1	Turquoise (M1)	6.61761	6.52931	6.60411	6.63733	6.5959	8.40478	8.40742	7.72122	8.04423	8.64966	7.48924	7.07208	6.62841	6.74556	6.68619	6.65928	6.7585	6.87475
ENSDARG00000016153	dag1	Turquoise (M1)	12.3108	12.2764	12.4457	12.3388	12.3387	11.5392	11.4202	11.7606	11.9822	11.2653	12.377	12.2453	12.3138	12.4573	12.2796	12.3478	12.3092	12.4348
ENSDARG00000016163	usp33	Turquoise (M1)	11.7387	11.7184	11.7758	11.7679	11.7711	10.9458	11.392	11.0628	11.4307	11.2226	11.3483	11.4968	11.6655	11.6793	11.6585	11.4822	11.6671	11.611
ENSDARG00000016238	arl6ip5b	Turquoise (M1)	10.4491	10.4579	10.4277	10.4604	10.4799	10.8746	11.1121	10.8275	10.6499	11.1942	10.4009	10.2214	10.408	10.365	10.2626	10.1107	10.2818	9.81961
ENSDARG00000016239	psmd13	Turquoise (M1)	9.57838	9.54425	9.6364	9.57731	9.61276	10.5849	10.6037	10.5227	10.5727	11.0806	10.4093	9.9988	9.71765	9.68163	9.83669	9.5313	9.52733	9.63545
ENSDARG00000016253	ralab	Turquoise (M1)	8.33313	8.3282	8.40444	8.32508	8.36729	8.94435	9.22592	8.59475	8.82784	8.67045	8.62495	8.4738	8.37782	8.29664	8.51229	8.51438	8.34609	8.19633
ENSDARG00000016256	nudt3a	Turquoise (M1)	10.5787	10.3994	10.3738	10.347	10.4523	8.78299	8.98288	8.89508	9.20448	8.1344	9.80939	10.0569	10.3204	10.1956	10.1993	10.5033	10.431	10.1163
ENSDARG00000016260	fxr2	Turquoise (M1)	10.7203	10.8469	10.9449	10.6688	10.823	10.4139	10.2329	10.1698	10.8615	10.3306	10.7107	10.5416	10.6812	10.8183	10.5898	10.7646	10.7475	10.7612
ENSDARG00000016280	eif1ad	Turquoise (M1)	7.4797	7.40784	7.43511	7.53904	7.50555	8.32874	8.4502	7.99439	8.04939	8.57808	7.43852	7.70235	7.43109	7.67618	7.6704	7.44452	7.63174	7.76647
ENSDARG00000016304	tfdp1b	Turquoise (M1)	7.32092	7.20361	7.2826	7.3163	7.2912	8.32874	8.62461	8.39339	8.03906	8.15918	7.83494	7.65366	7.31951	7.31807	7.1831	7.16415	7.34233	7.56249
ENSDARG00000016307	mrpl46	Turquoise (M1)	7.90316	7.75882	7.74412	7.56686	7.77629	8.17713	8.11457	7.98909	8.3373	8.58174	8.17141	7.84998	7.88	7.42058	7.49915	7.69392	7.59385	7.69636
ENSDARG00000016318	med7	Turquoise (M1)	8.04696	7.93165	8.18975	7.95785	8.05373	8.71866	8.98579	8.55953	8.57339	9.19274	8.26113	7.99353	7.9215	8.19989	7.79063	7.87222	7.86567	7.95153
ENSDARG00000016336	tmco6	Turquoise (M1)	7.072	7.18252	7.29152	7.46204	7.25927	7.40896	7.6084	7.89585	7.78451	7.83513	7.30717	7.41116	7.1688	7.50066	7.13153	7.21947	7.26693	7.36507
ENSDARG00000016348	dip2bb	Turquoise (M1)	12.1162	12.3261	12.3201	12.1515	12.2127	10.6859	11.0469	11.1558	11.099	10.257	11.7434	12.1097	12.2796	12.2151	12.4178	12.2529	12.4394	12.392
ENSDARG00000016364	gna15.1	Turquoise (M1)	6.75062	6.79258	6.72974	6.69004	6.74418	5.12068	5.70154	5.57478	5.18491	5.38092	6.38761	5.94072	6.11331	6.51249	6.07548	6.27557	5.98522	6.12787
ENSDARG00000016368	zbtb8os	Turquoise (M1)	7.92685	7.81427	7.72461	7.9009	7.85618	8.81557	8.90517	8.62573	8.3415	9.04941	7.82374	7.64746	7.77389	7.43697	7.63409	7.57681	7.82708	7.51792
ENSDARG00000016375	asns	Turquoise (M1)	8.47876	8.34237	8.46421	8.97072	8.56541	9.71409	9.50438	9.52518	10.0932	9.65897	9.57539	8.8028	8.69987	8.71154	8.34361	8.22499	8.24268	8.45314
ENSDARG00000016396	fam219aa	Turquoise (M1)	10.1148	10.0394	10.0691	10.1377	10.0672	8.21767	8.40307	8.43677	8.69644	7.74609	9.89036	9.92562	9.9348	10.0777	10.1201	9.93704	9.9362	9.68424
ENSDARG00000016399	riok1	Turquoise (M1)	8.89243	9.04528	8.79406	9.06084	8.95835	10.1542	9.97682	9.98479	10.0258	9.82405	9.19354	8.97022	9.01554	8.77038	8.97586	8.72525	9.07392	8.78728
ENSDARG00000016404	ptch1	Turquoise (M1)	10.12	10.2438	10.295	10.1036	10.1781	8.91732	8.8424	9.38356	9.44939	8.76048	9.69789	10.1172	10.0523	10.07	10.2207	10.2415	10.1991	10.5059
ENSDARG00000016464	cdc42bpab	Turquoise (M1)	11.1686	11.2733	11.4331	10.9458	11.2078	9.60153	9.82618	10.1652	10.2848	9.43455	10.6771	10.8947	11.0528	11.0903	11.0197	11.3262	11.2932	11.2891
ENSDARG00000016474	galcb	Turquoise (M1)	8.52591	8.30428	8.38394	8.44913	8.43484	9.27541	9.25512	9.3303	9.5524	9.59342	9.07399	8.79446	8.93136	8.51903	8.53205	8.28004	8.48432	8.15641
ENSDARG00000016477	eif4a2	Turquoise (M1)	10.6382	10.6687	10.5529	10.6731	10.6706	9.81118	9.86613	9.64911	9.91065	9.94117	10.2603	10.1502	10.4317	10.3693	10.4163	10.5347	10.6168	10.3992
ENSDARG00000016484	dkc1	Turquoise (M1)	8.06128	8.11912	7.91435	8.1952	8.10804	10.3737	10.3681	9.69357	9.91206	10.7599	9.69178	8.77479	8.51155	8.24678	8.29815	8.19529	8.24268	8.48569
ENSDARG00000016490	rab11fip3	Turquoise (M1)	12.4659	12.4836	12.5069	12.4665	12.442	10.5128	11.0053	10.9398	11.0646	10.2022	11.8505	12.2373	12.3947	12.3199	12.5405	12.3538	12.6023	12.436
ENSDARG00000016496	cdk8	Turquoise (M1)	9.66034	9.50711	9.46984	9.59974	9.57911	9.75738	9.75647	9.77859	9.97003	10.1843	9.72209	9.6223	9.68549	9.57943	9.53095	9.39111	9.44524	9.40982
ENSDARG00000016516	rbm8a	Turquoise (M1)	9.30914	9.18518	9.23429	9.2458	9.30578	10.2385	10.3423	9.79833	10.0452	10.5648	9.44876	9.20443	9.34535	9.19925	9.11973	9.19148	9.25112	9.00477
ENSDARG00000016531	klhl4	Turquoise (M1)	8.46269	8.63848	8.54392	8.61716	8.55244	7.5219	7.22697	7.54404	7.98629	7.24788	8.21483	8.07874	8.1075	8.32312	8.38768	8.57007	8.48019	8.44843
ENSDARG00000016536	npas2	Turquoise (M1)	9.68589	9.61579	9.13008	9.096	9.39795	7.05416	7.01216	7.45414	7.65492	6.82594	8.67237	8.89676	9.47383	9.18732	9.306	9.5935	9.35145	9.42186
ENSDARG00000016548	eif5b	Turquoise (M1)	10.3966	10.3004	10.2392	10.2638	10.3587	11.1773	11.2361	10.8268	11.0156	11.6965	10.931	10.6564	10.5548	10.6027	10.2552	10.3147	10.2747	10.3009
ENSDARG00000016607	echdc2	Turquoise (M1)	5.95768	6.08618	5.80118	5.94687	5.95872	8.03808	7.53031	7.94597	7.39505	8.44353	7.37823	6.89251	6.45586	6.44731	6.40479	6.18561	5.85201	6.15277
ENSDARG00000016613	mcat	Turquoise (M1)	5.77878	6.01188	6.15596	6.11776	6.04142	5.42378	5.60108	5.43489	5.61414	5.14899	6.20052	6.10525	6.15618	6.1898	6.13198	6.22008	6.29652	5.71305
ENSDARG00000016649	akr7a3	Turquoise (M1)	7.42502	7.20361	7.16116	6.94122	7.20439	8.54928	8.4586	8.32787	8.34987	8.55589	7.9057	7.58387	7.64511	7.30024	7.51923	7.07685	7.21767	7.40486
ENSDARG00000016667	gabbr1b	Turquoise (M1)	13.7657	13.7815	13.9777	13.7915	13.7987	10.7871	10.9513	11.227	11.4179	10.2605	12.9467	13.3355	13.5	13.6067	13.6037	13.7433	13.9148	13.743
ENSDARG00000016676	gnao1a	Turquoise (M1)	13.459	13.4653	13.5849	13.4784	13.5309	12.3351	12.3484	12.7584	12.8556	12.2047	12.9956	12.9787	13.3052	13.3117	13.3532	13.3888	13.4713	13.529
ENSDARG00000016691	cd9b	Turquoise (M1)	8.46269	8.50645	8.37981	8.50735	8.50386	9.49412	10.6702	9.83701	9.31305	10.0653	8.53544	7.84458	8.65505	8.24678	8.46168	8.37216	8.43403	7.87615
ENSDARG00000016699	trpa1a	Turquoise (M1)	4.5503	4.5098	5.28546	4.16044	4.67012	5.74238	5.49048	5.75584	6.33438	5.56848	4.79455	4.47571	4.16044	4.16044	4.16044	4.98981	4.50414	4.16044
ENSDARG00000016706	atic	Turquoise (M1)	8.29731	7.9	7.75056	7.62093	7.88415	9.73435	8.97997	9.38356	9.32368	9.05732	8.96406	8.23939	7.73447	8.23287	7.51923	8.23033	7.73971	7.81136
ENSDARG00000016724	NKAPD1	Turquoise (M1)	7.838	7.88714	7.77605	7.87895	7.86322	8.66764	8.99735	8.51977	8.27716	8.99278	7.57887	7.85536	7.81225	7.68987	8.08701	7.84807	8.11	7.94484
ENSDARG00000016754	tbca	Turquoise (M1)	9.68819	9.44735	9.43846	9.63057	9.58759	10.5754	10.5933	10.2635	10.3181	10.9899	9.74589	9.60651	9.45387	9.59758	9.65754	9.29285	9.34919	9.38789
ENSDARG00000016773	cishb	Turquoise (M1)	5.8893	5.42952	5.48649	5.41337	5.55465	7.21603	7.80665	7.11466	7.42728	6.91174	5.5992	5.14045	5.34264	5.78466	5.08118	5.59986	5.05742	5.33551
ENSDARG00000016782	huwe1	Turquoise (M1)	13.8358	13.9494	14.0635	13.9033	13.9318	13.2352	13.4301	13.6487	13.6697	13.0984	13.9489	14.0378	13.958	14.0059	13.9334	13.9371	13.9907	14.0639
ENSDARG00000016788	zeb1a	Turquoise (M1)	10.6274	10.8625	10.9202	10.8453	10.7985	8.69338	8.63206	8.9827	9.28938	8.28158	10.4056	10.6441	10.5771	10.7216	10.7028	10.8039	10.8419	10.8538
ENSDARG00000016793	crybb1l2	Turquoise (M1)	5.65667	6.10999	5.71567	5.59345	5.80702	6.59051	6.94067	6.60901	7.37865	8.39433	5.95931	4.85994	5.89974	5.4587	5.78324	5.82332	5.70197	5.67703
ENSDARG00000016830	rimkla	Turquoise (M1)	12.5962	12.5981	12.8131	12.3946	12.6238	12.2036	12.1688	12.5595	12.4779	12.1324	12.6418	12.5114	12.7692	12.6597	12.8436	12.9607	12.9648	12.9184
ENSDARG00000016855	sf3b5	Turquoise (M1)	7.96548	7.79373	7.6507	8.2011	7.92511	9.03264	8.93255	8.93955	8.95098	9.54738	8.17141	7.91843	7.83726	7.84465	7.84715	7.96811	7.96374	7.84052
ENSDARG00000016866	fam102ab	Turquoise (M1)	9.15461	9.1588	9.92802	9.76564	9.50712	8.03303	7.84576	8.70521	8.27716	7.27561	9.18703	9.18116	8.89922	9.49289	9.41358	9.35139	9.51531	8.50849
ENSDARG00000016867	rnf128a	Turquoise (M1)	8.63982	8.49805	8.36316	8.62594	8.53936	9.10628	8.93856	9.05774	8.83083	9.05469	8.23606	8.6446	8.48421	8.49982	8.48214	8.4196	8.34609	8.27832
ENSDARG00000016868	rhobtb2a	Turquoise (M1)	11.8143	11.5174	11.6454	11.5094	11.5792	8.68699	8.86152	9.13864	9.24755	8.28608	11.1974	11.3566	11.5504	11.6171	11.4022	11.6378	11.4481	11.9138
ENSDARG00000016871	smarce1	Turquoise (M1)	11.1595	11.2124	11.4161	11.2725	11.2984	11.7313	11.9267	11.6851	12.1658	12.0961	11.4698	11.3884	11.3785	11.5263	11.3834	11.3729	11.3325	11.3709
ENSDARG00000016934	ttyh2	Turquoise (M1)	10.2219	10.1399	10.1693	10.2778	10.1767	9.76951	9.49626	9.83848	9.61085	9.04145	10.456	10.2743	10.1744	9.98154	10.3733	10.2901	10.3306	10.6335
ENSDARG00000016977	snx27b	Turquoise (M1)	10.3711	10.2325	10.3934	10.3484	10.3587	9.17405	9.41238	9.50868	9.61085	8.83603	9.84976	10.0393	10.1273	10.1021	10.1443	10.1498	10.2016	10.1715
ENSDARG00000016979	pmpcb	Turquoise (M1)	8.52075	8.58394	8.51784	8.38327	8.53497	8.93899	9.0731	8.73707	8.73523	9.27869	8.52859	8.69631	8.5535	8.44866	8.46168	8.41258	8.48843	8.40533
ENSDARG00000016994	ssrp1b	Turquoise (M1)	10.4396	10.594	10.5792	10.8121	10.6373	9.86305	10.3009	9.73355	10.063	9.58797	10.317	10.3311	10.4214	10.5543	10.6143	10.4632	10.5778	10.5161
ENSDARG00000017006	dennd5a	Turquoise (M1)	12.5205	12.7042	12.7724	12.5741	12.642	10.8962	10.9424	11.306	11.5427	10.4841	12.4451	12.6867	12.673	12.6696	12.5045	12.6586	12.5892	12.5588
ENSDARG00000017047	slc27a4	Turquoise (M1)	10.157	10.1626	10.2774	10.0638	10.1266	8.06798	8.17199	8.4637	8.84271	7.88363	9.82204	9.8445	10.1621	9.89177	9.86805	9.93542	9.7624	10.0214
ENSDARG00000017049	adsl	Turquoise (M1)	8.04696	7.98691	8.29453	8.17735	8.1489	9.03515	9.22592	8.87518	8.83678	9.20229	8.79737	8.0225	8.5535	8.33184	8.28072	7.84807	7.9814	8.35587
ENSDARG00000017067	chordc1b	Turquoise (M1)	8.70498	8.78724	8.52159	8.93938	8.7734	9.36612	9.43168	9.10975	9.12403	9.75445	9.0115	8.65694	8.71674	8.688	8.7585	8.4968	8.65862	8.60896
ENSDARG00000017084	bud31	Turquoise (M1)	8.91226	8.81793	8.95808	8.97759	8.94188	9.77403	10.0057	9.44459	9.62982	10.1698	9.33565	8.89676	8.9486	8.95358	9.11973	8.68703	8.69108	8.84928
ENSDARG00000017086	asb12a	Turquoise (M1)	6.95226	7.15027	6.98453	6.9268	7.0127	7.68575	7.89007	7.59396	7.74686	7.61556	7.49634	7.20583	7.11817	7.00126	7.10501	7.07685	7.05852	7.2162
ENSDARG00000017108	kcna1b	Turquoise (M1)	11.0259	11.1212	11.0729	11.0349	10.9907	8.98917	9.132	9.4751	9.6281	8.55961	9.91156	10.4926	10.8256	10.6719	10.5444	10.6055	10.9618	10.5239
ENSDARG00000017162	kif3ca	Turquoise (M1)	10.501	10.6125	10.7598	10.5621	10.6219	8.56332	8.75988	9.00641	9.31305	8.35201	10.3299	10.3699	10.6252	10.5955	10.5673	10.6503	10.6809	10.7062
ENSDARG00000017173	si:dkey-29p10.4	Turquoise (M1)	9.13787	9.02497	9.02303	9.14565	9.07165	7.66627	7.68242	7.96769	8.06474	7.17113	8.94875	9.30767	9.46787	9.41111	9.03929	9.24371	9.16908	9.23247
ENSDARG00000017211	plxnb1b	Turquoise (M1)	12.1115	11.4996	11.867	11.852	11.8259	10.3487	10.0071	10.6708	10.6516	10.0201	12.3643	12.3917	12.1051	12.1932	12.2483	12.094	12.0047	12.2003
ENSDARG00000017220	otud7b	Turquoise (M1)	10.2377	10.3172	10.4267	10.3863	10.3198	8.62815	8.6505	8.76206	9.16008	8.32162	10.2468	10.3968	10.2584	10.2732	10.3204	10.2123	10.2795	10.3126
ENSDARG00000017234	npy8ar	Turquoise (M1)	10.9281	10.9442	11.1584	10.9554	10.9608	7.99722	8.42468	8.31947	8.53359	7.4955	9.5704	10.5938	10.8326	10.8067	11.1183	10.6086	11.0636	10.7469
ENSDARG00000017254	kcnk1b	Turquoise (M1)	10.7689	10.8714	10.9414	11.039	10.8991	7.93364	8.11988	8.28965	8.56264	7.60835	9.91681	10.2368	10.5973	10.3045	10.3855	10.3633	10.4585	10.4412
ENSDARG00000017266	scml4	Turquoise (M1)	9.57341	9.74902	9.81956	9.54992	9.63953	7.20701	7.70389	7.74662	8.23712	7.3028	9.31789	9.20863	9.35184	9.52548	9.60264	9.86708	9.65148	9.55026
ENSDARG00000017316	bag5	Turquoise (M1)	9.83036	10.2822	10.1752	10.1254	10.1179	8.40088	8.77677	9.01163	9.12159	8.61073	9.81783	9.79522	9.95907	10.013	9.97456	10.1179	10.2508	10.1913
ENSDARG00000017337	zgc:77929	Turquoise (M1)	7.51152	7.36184	7.24634	7.23735	7.363	7.93905	7.95704	7.60095	7.70163	8.20274	7.81245	7.42578	7.56484	7.15873	7.29262	7.30877	7.11361	7.14723
ENSDARG00000017365	slc23a2	Turquoise (M1)	11.1175	10.974	11.1811	11.005	11.0309	9.4344	9.26232	9.63397	10.0413	9.1216	10.8254	10.6785	10.8372	10.7981	11.1208	11.171	11.0684	10.9723
ENSDARG00000017366	prdm4	Turquoise (M1)	9.02585	9.12376	9.16646	8.88192	9.06862	8.477	8.73935	8.69551	8.88643	8.29057	8.95897	9.05415	9.09506	9.15826	9.16466	9.03912	9.30332	9.13047
ENSDARG00000017385	b9d2	Turquoise (M1)	6.75062	7.15027	7.05999	6.89749	6.97363	7.2339	7.6084	7.31611	7.34527	7.90139	7.13507	6.81585	6.96576	6.94454	7.17038	7.07685	6.94132	7.11142
ENSDARG00000017391	unc13ba	Turquoise (M1)	11.306	11.444	11.2784	11.3179	11.3485	10.6396	10.535	10.5462	10.954	10.3798	11.0794	11.1663	11.1681	11.3941	11.3975	11.0842	11.3619	11.1303
ENSDARG00000017398	slc44a5a	Turquoise (M1)	8.48937	8.82466	8.81255	9.06729	8.74709	7.60619	6.68618	7.2551	7.49722	7.32065	8.20625	7.99353	8.40725	8.64321	8.33238	8.6636	8.49662	8.83853
ENSDARG00000017400	klf1	Turquoise (M1)	6.14266	5.87714	5.93122	7.3701	6.28335	7.65314	7.63101	8.05649	8.1678	7.82895	6.44952	6.41222	6.72772	5.53213	5.27911	5.82332	7.09183	6.45877
ENSDARG00000017427	phf20l1	Turquoise (M1)	10.278	10.3938	10.3413	10.3694	10.3587	9.92673	10.0701	9.8326	10.0413	9.74306	10.1341	10.3088	10.2129	10.2989	10.2146	10.2702	10.2471	10.3022
ENSDARG00000017431	mindy2	Turquoise (M1)	10.5849	10.5601	10.6112	10.4407	10.5618	9.90352	10.5576	9.94992	10.0819	9.62391	10.3648	10.2368	10.4439	10.386	10.5187	10.6952	10.5279	10.5733
ENSDARG00000017466	ncam2	Turquoise (M1)	11.3725	11.4187	11.5823	11.4735	11.4853	10.7796	10.9632	11.0006	10.9479	10.2188	11.1855	10.9198	11.199	11.1833	11.2822	11.2814	11.3708	11.2766
ENSDARG00000017522	ctdp1	Turquoise (M1)	9.95975	10.1758	10.2012	9.92155	10.0381	9.23878	9.55415	9.74924	9.55421	8.86638	9.64508	10.1049	9.9477	10.079	10.2222	10.2296	10.2747	9.95168
ENSDARG00000017525	ccnt1	Turquoise (M1)	9.84073	9.90151	10.0511	9.95672	9.93715	9.01999	9.41022	9.54509	9.36132	8.95093	9.75325	9.91028	9.84571	9.87402	9.96734	9.91987	9.9362	9.94001
ENSDARG00000017542	fgf1a	Turquoise (M1)	8.06839	8.194	7.98697	7.86412	8.04138	6.63233	6.71531	6.7824	7.18442	6.59195	7.30717	7.28035	7.66624	7.76291	7.68821	7.64262	7.547	7.18214
ENSDARG00000017579	si:ch211-195b15.7	Turquoise (M1)	6.02245	5.95976	6.72974	7.05151	6.40936	7.22499	8.66509	7.29029	7.78451	8.14437	6.60627	6.10525	6.40466	6.93291	7.03642	6.1739	6.62659	6.07654
ENSDARG00000017591	fat1a	Turquoise (M1)	13.1854	13.3202	13.2113	13.0026	13.1413	12.1805	12.8095	12.9739	12.9816	12.3182	13.0318	12.7037	13.1428	13.1988	13.2626	13.1798	13.2684	13.2331
ENSDARG00000017602	ccng2	Turquoise (M1)	8.64932	8.63848	8.88716	8.79508	8.76593	8.27	7.93909	8.40932	8.2098	7.81652	8.57258	8.81661	8.432	8.63268	8.7793	8.94029	8.84961	8.78355
ENSDARG00000017605	rpp40	Turquoise (M1)	6.75062	6.93933	6.51335	6.89749	6.77505	8.29547	8.30856	7.5147	7.76581	8.18837	6.95967	6.95499	6.71397	6.74556	6.40479	6.52238	6.37317	6.81615
ENSDARG00000017606	sys1	Turquoise (M1)	8.33901	8.3091	8.30329	8.43919	8.36729	9.19445	8.76666	8.81973	9.05932	9.23752	8.44364	8.35382	8.13795	8.29664	8.28655	8.11102	8.31399	8.08526
ENSDARG00000017617	alg6	Turquoise (M1)	7.73429	7.62556	7.74412	7.91535	7.74609	8.92005	9.11086	8.49014	8.64645	8.95658	8.14021	7.91843	7.86184	7.94493	7.76571	7.75834	7.94586	7.84052
ENSDARG00000017636	rnf167	Turquoise (M1)	9.78379	9.66721	9.88793	9.82966	9.79234	8.72179	8.75988	8.96667	9.05932	8.17385	9.87156	10.0275	9.7815	9.81786	9.89685	9.82377	9.83026	9.78834
ENSDARG00000017658	gmppb	Turquoise (M1)	9.2037	9.18518	9.1028	9.26277	9.20179	10.5065	10.7129	10.2503	10.694	11.0591	10.319	9.65644	9.25824	9.36524	9.27414	9.08243	9.14067	9.29142
ENSDARG00000017661	braf	Turquoise (M1)	11.356	11.4721	11.4902	11.5065	11.4722	10.1874	10.388	10.6807	10.6122	9.8875	10.6608	11.1226	11.2163	11.4054	11.3082	11.324	11.4301	11.2666
ENSDARG00000017665	snrkb	Turquoise (M1)	11.1529	11.2622	11.2391	11.5765	11.3164	9.00209	8.93255	9.19474	9.6195	8.81752	10.0684	10.1447	10.2306	10.4868	10.3882	10.4575	10.5477	10.226
ENSDARG00000017673	nova2	Turquoise (M1)	14.5927	14.6183	14.6481	14.6144	14.6298	13.6819	13.7874	14.1501	14.0226	13.8715	14.1719	14.3685	14.4915	14.609	14.5912	14.6581	14.7404	14.6794
ENSDARG00000017708	lrrc40	Turquoise (M1)	8.55146	8.70204	8.39627	8.83726	8.63267	9.12765	9.16057	8.988	9.18828	9.4626	8.83117	8.58129	8.50379	8.61137	8.60381	8.50562	8.5683	8.72249
ENSDARG00000017728	phb2b	Turquoise (M1)	8.44644	8.49805	8.55129	8.48338	8.51727	9.53023	9.46953	9.1786	9.60563	9.77856	9.0115	8.71707	8.65855	8.49982	8.50231	8.46777	8.68034	8.62991
ENSDARG00000017740	sec63	Turquoise (M1)	11.0751	10.9603	10.978	11.0167	11.0262	11.4446	11.6657	11.3202	11.4762	11.4858	11.1536	10.9319	10.971	10.9104	10.9081	10.8816	10.9447	10.8872
ENSDARG00000017742	grm6a	Turquoise (M1)	7.42502	8.1081	8.21319	7.9009	7.91159	6.15928	6.08174	6.37652	7.31109	6.30847	8.02776	7.08141	7.55732	7.6343	7.88618	8.52526	8.0555	8.05453
ENSDARG00000017762	srrt	Turquoise (M1)	10.3739	10.4622	10.3779	10.3668	10.4441	10.8012	10.8506	10.6223	10.4712	11.1151	10.3387	10.5148	10.457	10.4333	10.6143	10.3358	10.5038	10.545
ENSDARG00000017775	atp5mc3a	Turquoise (M1)	10.1768	10.3373	10.5747	10.437	10.4146	11.3202	11.3402	11.1356	11.129	11.7931	10.7235	10.5257	10.5255	10.5515	10.4875	10.3462	10.2783	10.1629
ENSDARG00000017781	hsd17b10	Turquoise (M1)	8.7975	8.61147	8.96084	8.61716	8.77712	9.4344	9.3461	9.22873	9.36955	9.53044	8.86148	8.76912	8.67246	8.7182	8.85961	8.55953	8.69108	8.56179
ENSDARG00000017785	zgc:158689	Turquoise (M1)	11.0049	11.2529	11.3706	11.1503	11.1673	10.6552	10.8466	10.9432	9.80084	10.4253	11.0391	11.3009	11.0627	11.2706	11.1797	11.359	11.1347	11.2212
ENSDARG00000017809	stard3	Turquoise (M1)	8.66344	8.6499	8.69783	8.64766	8.68113	9.16489	9.45702	9.09508	9.07199	9.13412	8.78304	8.9174	8.76296	8.71154	8.71165	8.593	8.64026	8.50396
ENSDARG00000017813	pigs	Turquoise (M1)	9.4729	9.49662	9.55461	9.67561	9.56628	9.94422	9.73246	9.7663	9.88648	9.80696	9.67947	9.37261	9.49938	9.51023	9.57677	9.44128	9.46828	9.55683
ENSDARG00000017821	gata5	Turquoise (M1)	4.5503	4.76265	4.16044	5.36297	4.67012	5.71434	5.11696	4.72677	5.47814	5.49745	4.71069	4.70437	4.49681	4.16044	4.54163	4.16044	4.16044	4.78628
ENSDARG00000017841	cand1	Turquoise (M1)	12.1809	12.0283	12.0988	12.1561	12.1277	11.4796	11.5252	11.5089	11.8172	11.4512	12.1473	11.9662	12.0414	12.0948	11.9984	11.9832	12.0602	12.1603
ENSDARG00000017842	syvn1	Turquoise (M1)	9.28805	9.37358	9.6225	9.32065	9.42188	9.91449	9.97243	9.80284	9.67368	9.9805	9.70702	9.65029	9.53971	9.60477	9.46322	9.35626	9.45576	9.59986
ENSDARG00000017844	copz1	Turquoise (M1)	9.73122	9.64458	9.689	9.77553	9.74192	10.3974	10.444	10.2602	10.0857	10.8679	9.8607	9.63169	9.47383	9.62967	9.76767	9.52482	9.36043	9.76206
ENSDARG00000017860	rgs5b	Turquoise (M1)	7.95015	8.1246	8.32065	8.38327	8.21083	8.82142	9.15024	8.91749	9.12159	9.9326	8.00317	7.33569	7.66624	7.76291	7.76571	8.06395	7.67592	7.57993
ENSDARG00000017886	zbtb11	Turquoise (M1)	9.99919	9.96375	10.0588	9.91441	10.0084	9.44011	9.42099	9.67398	9.83541	9.35766	9.75765	9.96701	10.1498	9.90056	10.0013	9.94838	9.93169	10.0308
ENSDARG00000017901	tln2a	Turquoise (M1)	11.2849	11.4635	11.6138	11.66	11.5195	10.1829	11.1897	10.7494	10.6406	10.1795	11.0541	10.9939	11.199	11.213	11.3421	11.3666	11.4216	11.4744
ENSDARG00000017910	pdss1	Turquoise (M1)	7.6321	7.64866	7.44311	7.54837	7.58466	8.64474	9.10552	8.49387	8.60864	9.20703	8.23606	7.83371	7.90977	7.42058	7.53904	7.39753	7.09183	7.45308
ENSDARG00000017929	ncoa2	Turquoise (M1)	12.0318	12.0822	12.2141	11.9975	12.0935	11.3166	11.6221	11.6855	11.576	11.0877	11.69	12.0079	12	12.0104	12.0217	12.0002	12.1776	12.073
ENSDARG00000017931	ints6l	Turquoise (M1)	9.65565	9.71504	9.63812	9.45715	9.61898	8.73424	8.58679	8.6627	8.80979	8.27706	9.22988	9.37634	9.3169	9.51788	9.57439	9.3055	9.44101	9.49207
ENSDARG00000017960	sfxn2	Turquoise (M1)	7.18224	6.91379	7.25549	7.07776	7.09982	8.88977	9.00597	8.12086	8.46982	8.82371	7.82935	7.28035	7.06564	7.07696	7.40508	7.33898	7.44837	7.4905
ENSDARG00000017985	zgc:77739	Turquoise (M1)	6.5975	6.44095	6.54429	7.16595	6.69653	7.98681	7.95704	7.46953	7.22179	7.66506	7.35494	6.82707	6.89494	6.37876	7.10501	6.32878	6.49744	6.69087
ENSDARG00000017986	vps13d	Turquoise (M1)	12.2004	12.231	12.3033	12.3681	12.2503	11.2543	11.58	11.5412	11.6813	10.8338	12.0153	12.2422	12.2073	12.1361	12.1615	12.1209	12.2633	12.1696
ENSDARG00000018000	ubp1	Turquoise (M1)	10.8897	10.983	10.9138	11.1729	11.0018	9.32765	9.11086	9.50129	9.86773	9.149	10.4775	10.7413	10.688	10.8759	10.6654	10.4632	10.6764	10.5317
ENSDARG00000018002	eci1	Turquoise (M1)	7.81277	8.21982	8.21319	8.47368	8.18301	9.56545	9.31178	9.65411	8.80979	9.14406	8.95642	8.78044	8.6088	8.41624	8.50231	8.3937	8.21314	8.44843
ENSDARG00000018006	vrk1	Turquoise (M1)	8.78894	8.82466	8.96911	9.07051	8.9185	9.41135	9.13462	9.41538	9.06186	9.52855	8.75983	8.90454	8.94288	8.88722	8.77101	8.74025	8.7436	8.67493
ENSDARG00000018025	tbx2a	Turquoise (M1)	4.93326	5.55008	5.59062	5.46137	5.37886	6.68615	8.26127	6.02879	7.48962	7.06886	6.53728	5.80089	5.46417	5.24767	5.39077	5.82332	5.8235	5.52
ENSDARG00000018040	msantd4	Turquoise (M1)	8.41894	8.69471	8.66767	8.67331	8.60782	6.7878	6.95284	6.86738	7.12642	6.25143	7.81245	7.98374	8.38206	8.49982	8.60381	8.72525	8.70174	8.72638
ENSDARG00000018065	ntm	Turquoise (M1)	8.45188	8.77686	8.91595	8.73142	8.69692	7.64652	7.84576	7.64894	8.2946	7.23851	8.46176	8.38012	8.60154	8.52664	8.8439	9.07654	8.67674	8.72638
ENSDARG00000018073	mrps22	Turquoise (M1)	8.54639	8.49383	8.48744	8.61716	8.55678	9.19445	8.82627	9.09508	9.13855	9.30106	8.47252	8.30757	8.23031	8.50754	8.28072	8.24358	8.50882	8.47647
ENSDARG00000018096	scap	Turquoise (M1)	10.4733	10.3537	10.5233	10.3324	10.3978	8.97875	9.16314	9.22649	9.52503	8.60354	10.4641	10.6301	10.3903	10.386	10.6598	10.4155	10.5219	10.545
ENSDARG00000018107	rab3da	Turquoise (M1)	7.36814	7.12835	6.928	7.4117	7.23758	6.09887	5.87939	6.39335	6.20434	5.8143	7.21514	6.81585	7.62367	7.61288	7.51923	7.41651	7.35148	7.11142
ENSDARG00000018109	mafga	Turquoise (M1)	6.11366	6.01188	6.27382	6.11776	6.14378	4.80706	4.64522	4.95637	4.89229	4.63349	6.08571	5.84934	6.2179	5.99197	6.26314	6.56668	6.35443	6.5887
ENSDARG00000018146	gpx1a	Turquoise (M1)	9.16456	8.94384	9.51567	10.0312	9.41712	10.0185	9.87868	10.5172	10.1858	10.846	9.80798	9.616	9.46787	9.37369	8.82802	8.86871	9.30797	8.95257
ENSDARG00000018149	slc38a4	Turquoise (M1)	9.25738	9.75783	8.69118	9.79704	9.39553	7.33658	7.73202	7.15351	7.56387	8.27706	8.26113	9.66561	8.23031	8.76718	9.32025	9.35626	9.35819	9.86087
ENSDARG00000018162	ctnnal1	Turquoise (M1)	9.8157	9.68579	9.79035	9.73962	9.76829	8.1541	8.66146	8.50503	9.14337	8.62145	9.07164	9.11124	9.65784	9.44157	9.31171	9.56957	9.39801	9.26225
ENSDARG00000018178	pgm2	Turquoise (M1)	9.04033	8.84135	8.91595	8.98784	8.95507	9.53734	10.1756	9.84141	10.0284	9.79283	9.66706	9.0864	9.41309	9.06999	9.03584	9.01928	9.16396	9.28088
ENSDARG00000018192	ubr5	Turquoise (M1)	12.6181	12.8639	13.0001	12.6453	12.7913	12.2194	12.5682	12.7099	12.86	12.0523	12.8556	12.8814	12.7639	12.8165	12.8294	12.9241	12.8533	13.0055
ENSDARG00000018257	ncoa1	Turquoise (M1)	11.7899	11.9436	12.0402	11.8631	11.8679	10.1554	10.1819	10.5922	10.6882	9.71335	11.153	11.6647	11.6806	11.8041	11.9085	11.8369	12.0526	11.8422
ENSDARG00000018264	trim101	Turquoise (M1)	5.51956	5.34046	4.96576	5.36297	5.27791	5.94541	5.56546	6.02879	5.76352	6.0633	5.714	5.23008	5.57289	5.24767	5.39077	5.12431	5.05742	5.28348
ENSDARG00000018270	olfm1a	Turquoise (M1)	13.3472	13.1849	13.5279	12.6886	13.2296	11.659	12.2483	12.2888	12.6654	11.4076	12.3293	12.8583	13.1561	13.1041	13.1067	13.2027	13.2782	13.2309
ENSDARG00000018312	rell1	Turquoise (M1)	7.53234	7.81427	7.74412	7.92966	7.76127	8.14478	8.71151	8.21456	8.16306	8.65662	8.05193	7.72019	7.64511	7.6343	7.76571	7.5977	7.86567	7.69636
ENSDARG00000018393	kank2	Turquoise (M1)	10.5836	10.6919	10.7518	10.5263	10.5842	9.29654	9.59086	9.62039	9.70654	8.74096	10.3299	10.554	10.4739	10.5883	10.869	10.7462	10.8078	10.5862
ENSDARG00000018411	mknk1	Turquoise (M1)	7.7957	7.85448	8.16592	8.06535	7.99728	8.9497	9.79341	9.15287	8.90921	9.46062	8.28576	8.1807	8.19215	8.0117	8.29815	7.81286	7.81399	7.75119
ENSDARG00000018426	aldh7a1	Turquoise (M1)	9.62475	9.53813	9.59786	9.75769	9.66381	10.2547	10.129	10.0124	10.0981	10.3153	9.97837	9.6081	9.52064	9.62791	9.63035	9.48755	9.46412	9.60409
ENSDARG00000018461	zgc:56095	Turquoise (M1)	8.26058	8.0226	8.03517	8.32508	8.17173	8.94703	8.64683	9.13625	8.65321	9.24677	8.75102	8.48423	8.36073	8.21883	8.43568	8.38656	8.46358	8.65055
ENSDARG00000018494	smn1	Turquoise (M1)	7.78709	7.56206	7.84988	7.93676	7.79853	8.05808	8.13046	8.11601	8.01292	8.41504	7.94755	7.66599	7.77389	7.83238	7.81513	7.5078	7.80739	7.74348
ENSDARG00000018562	cope	Turquoise (M1)	9.76212	9.77703	9.7919	9.96711	9.85167	10.6666	10.816	10.4468	10.5931	11.0138	10.3299	10.0499	9.7654	9.82866	9.79037	9.45043	9.61253	9.66005
ENSDARG00000018566	flnca	Turquoise (M1)	7.45808	7.20361	7.36091	6.48578	7.13555	8.34101	8.42039	8.5452	9.31944	9.72332	7.74869	8.09246	7.76087	8.30552	7.02229	7.1585	7.51488	7.18214
ENSDARG00000018593	parp16	Turquoise (M1)	8.50515	8.35639	8.44456	8.32508	8.41587	8.92277	8.95051	8.73707	8.5876	9.03879	8.59573	8.71412	8.48026	8.43659	8.48214	8.45872	8.45099	8.42465
ENSDARG00000018619	cers4b	Turquoise (M1)	9.81149	9.87584	9.84969	9.99783	9.88303	7.76718	8.09849	8.30251	8.4111	7.57172	8.95897	9.04715	9.54915	9.51788	9.51369	9.5313	9.46203	9.45035
ENSDARG00000018627	arl5a	Turquoise (M1)	8.7975	8.66124	8.68115	8.67331	8.7203	9.18994	9.40372	9.04508	9.10196	9.59161	8.82559	8.77762	8.74662	8.81454	8.68102	8.593	8.65862	8.67493
ENSDARG00000018643	igf2a	Turquoise (M1)	8.12404	8.47253	8.01928	8.41911	8.28074	10.8049	11.0315	10.5948	10.4798	10.3087	9.17612	8.9174	8.90217	9.06999	9.56724	8.55953	9.58979	8.67493
ENSDARG00000018650	gtpbp3	Turquoise (M1)	6.78635	6.88776	7.00651	6.4242	6.77505	6.32508	6.37261	6.62316	6.76804	6.28973	6.60627	6.62259	6.85812	6.81089	6.82409	6.97079	7.00115	6.98495
ENSDARG00000018687	itga2b	Turquoise (M1)	5.02199	5.2927	5.23972	6.40303	5.4257	6.34226	6.74383	5.93652	5.81822	7.18096	5.84299	5.91852	5.25234	5.4587	5.58279	5.18413	6.19386	5.28348
ENSDARG00000018721	npnt	Turquoise (M1)	9.85718	9.78739	10.1145	9.82014	9.91204	8.30386	8.3132	8.64601	9.07451	8.03609	8.96152	9.30572	9.38174	9.38418	9.50124	9.662	9.28927	9.4806
ENSDARG00000018726	slco3a1	Turquoise (M1)	9.8009	9.7366	9.89228	10.2138	9.87265	7.96578	8.3678	8.18246	8.09992	7.43142	9.15627	9.45956	9.58262	9.59035	9.54072	9.45043	9.57249	9.46904
ENSDARG00000018743	scamp5a	Turquoise (M1)	11.845	11.9068	11.9364	11.8543	11.8912	9.08943	9.30249	9.51787	9.77009	8.74749	11.5369	11.5125	11.7493	11.6145	11.6802	11.7909	11.9196	11.8132
ENSDARG00000018773	hivep2b	Turquoise (M1)	12.6211	12.4759	12.6378	12.4279	12.5071	9.59302	9.72379	9.92528	10.3096	9.13412	11.472	11.558	12.0738	12.2048	12.2269	12.4482	12.4197	12.4543
ENSDARG00000018782	kdm4aa	Turquoise (M1)	10.9154	11.115	10.9518	11.0423	10.9883	9.24531	9.25029	9.56473	9.5881	8.64616	10.4397	10.879	10.6508	10.9112	11.0144	11.0379	11.2037	11.0174
ENSDARG00000018788	st8sia2	Turquoise (M1)	8.21649	8.2946	8.24537	9.00812	8.41587	6.35922	6.46253	6.56564	6.9588	6.19175	7.63134	7.76096	7.80593	8.15634	8.49226	8.51001	8.2181	8.62991
ENSDARG00000018825	tmem248	Turquoise (M1)	9.52789	9.35279	9.5213	9.39949	9.42425	8.52081	8.32245	8.63928	8.48128	7.79765	9.72808	9.616	9.47779	9.52168	9.41358	9.45157	9.48687	9.46904
ENSDARG00000018890	snrpa	Turquoise (M1)	9.16125	9.1073	9.13743	8.94289	9.10456	9.89939	10.1641	9.57357	9.98885	10.0495	9.52297	9.28998	9.25824	9.10341	8.8557	9.11875	9.13019	9.06746
ENSDARG00000018896	mmp24	Turquoise (M1)	13.0781	12.8379	12.8878	12.9482	12.9157	10.5935	10.9357	10.8604	11.1113	10.1867	12.4287	12.7618	12.705	12.6802	12.9341	12.8492	13.0234	12.9516
ENSDARG00000018902	pes	Turquoise (M1)	9.67897	9.68579	9.68065	9.93395	9.76455	10.2109	10.3792	9.95263	10.6183	10.5274	9.68871	9.78122	9.5168	9.6226	9.93067	9.7691	9.73503	9.84486
ENSDARG00000018903	aimp2	Turquoise (M1)	8.04696	8.48535	8.75634	8.29783	8.42539	9.13705	9.35736	9.21974	9.3757	9.46062	9.05028	8.65078	8.80458	8.75428	8.34361	8.63175	8.46358	8.62574
ENSDARG00000018907	kat6a	Turquoise (M1)	12.6178	12.6875	12.8008	12.7096	12.6974	11.6524	11.6562	11.9688	12.0894	11.2412	12.1509	12.5416	12.4191	12.6103	12.6862	12.6661	12.7593	12.7663
ENSDARG00000018914	hnrnpk	Turquoise (M1)	10.7569	10.8625	10.8097	10.8905	10.8611	11.0717	10.857	11.0176	10.9845	11.2963	10.8721	10.8979	10.7301	10.7783	10.925	10.7628	10.7729	10.8653
ENSDARG00000018936	zcchc17	Turquoise (M1)	8.48937	8.37488	8.23167	8.51683	8.46285	9.07238	8.64683	8.88374	8.92606	9.32964	8.21055	8.31538	8.24437	8.55668	8.36029	8.11391	8.34154	8.23518
ENSDARG00000018953	gclm	Turquoise (M1)	8.04696	8.36567	8.19917	8.32508	8.25959	8.87299	9.36631	8.45222	8.93719	9.32746	8.31398	7.99353	8.25366	7.84465	8.04629	8.3181	8.21314	8.15061
ENSDARG00000018958	nrarpb	Turquoise (M1)	8.78894	8.51481	8.4406	8.08464	8.46746	7.43997	7.20691	7.80216	7.69505	6.78746	7.99821	8.74333	8.38206	8.44465	8.50231	8.93378	8.79427	8.87054
ENSDARG00000018967	gabbr1a	Turquoise (M1)	9.99919	10.2134	10.4416	10.0847	10.0566	9.02253	9.30249	9.07279	9.71302	8.26341	9.60171	9.58894	9.89834	9.69686	9.78627	10.4115	9.98639	10.2746
ENSDARG00000018971	b3gnt5a	Turquoise (M1)	5.65667	5.24239	5.23972	5.36297	5.37886	7.05416	7.77996	6.55086	6.41993	7.23851	6.46455	5.58372	5.29857	5.4587	5.15227	5.85417	5.8235	5.78186
ENSDARG00000019004	smarcd1	Turquoise (M1)	10.8169	10.9565	10.9393	10.8216	10.9042	10.5676	10.517	10.5614	10.9348	10.3745	10.6701	10.8417	10.8209	10.89	10.8435	10.7923	10.8004	10.7958
ENSDARG00000019144	rab4a	Turquoise (M1)	9.52016	9.53608	9.60494	9.80864	9.62724	9.15798	8.99158	9.2663	9.40001	8.52576	9.49163	9.30767	9.49548	9.31347	9.46322	9.52157	9.40888	9.4829
ENSDARG00000019208	camsap1a	Turquoise (M1)	11.0934	11.2647	11.3763	11.1729	11.2538	9.75585	9.89731	10.0162	10.6346	10.3511	10.6171	10.7854	10.9808	10.8915	11.1529	11.1838	10.9252	11.3087
ENSDARG00000019222	mrpl24	Turquoise (M1)	7.53234	7.5375	7.71146	7.69835	7.65145	8.49907	8.67233	8.01539	8.47365	8.73439	8.02288	7.53086	7.65219	7.85075	7.63409	7.35877	7.6975	7.72012
ENSDARG00000019231	sptan1	Turquoise (M1)	14.4614	14.5943	14.6378	14.5362	14.5896	13.559	13.5803	14.0671	13.9583	13.3872	14.3652	14.2573	14.4895	14.483	14.493	14.5588	14.6523	14.6815
ENSDARG00000019250	fancf	Turquoise (M1)	6.5139	6.13337	6.68914	6.58248	6.48713	7.02354	6.65642	7.02307	6.92499	7.06886	6.60627	6.21589	6.67186	6.64849	6.63065	6.34947	6.5796	6.69087
ENSDARG00000019278	GNB4	Turquoise (M1)	8.83954	8.89351	9.0362	8.81824	8.91513	7.22499	7.57768	7.77157	7.93707	7.00369	9.31391	9.17261	8.98246	9.00346	9.03584	9.26071	9.33102	9.4806
ENSDARG00000019299	znf687b	Turquoise (M1)	10.6346	10.6528	10.7228	10.7341	10.7032	10.1795	10.4576	10.2602	10.7296	10.0988	10.4578	10.5865	10.6216	10.6651	10.6304	10.7256	10.7251	10.8512
ENSDARG00000019300	ints7	Turquoise (M1)	9.37917	9.78222	9.54911	9.43486	9.51381	9.08215	8.9021	9.29438	9.05422	8.38177	9.33565	9.60014	9.20906	9.28464	9.46322	9.48644	9.75901	9.79575
ENSDARG00000019302	mid1ip1b	Turquoise (M1)	9.95975	9.92985	10.092	9.91441	9.9957	10.5554	10.8633	10.4058	10.8005	11.6572	10.4186	9.27807	9.77669	9.52927	9.14237	9.39822	9.41752	9.28352
ENSDARG00000019311	fbxo30b	Turquoise (M1)	7.4797	7.33349	7.43511	7.3701	7.41214	6.60459	6.86528	6.75712	7.03463	6.27072	7.77802	7.40379	7.40611	7.56905	7.1446	7.29342	7.49854	7.6057
ENSDARG00000019312	rab39ba	Turquoise (M1)	9.74675	9.72406	9.93506	9.76167	9.81781	9.26259	9.56584	9.33655	9.84872	9.25137	9.55532	9.7384	9.69572	9.77865	9.64174	9.70942	9.66424	9.75827
ENSDARG00000019332	ndufb4	Turquoise (M1)	9.19401	9.00437	8.91023	9.16685	9.1016	10.066	9.96362	9.73828	9.90075	10.3447	9.14512	8.83571	8.91976	9.11606	8.99376	8.71579	8.71583	8.88106
ENSDARG00000019338	adprhl2	Turquoise (M1)	8.99642	8.94693	9.31212	8.82588	9.05031	9.41908	9.39281	9.49571	9.49525	9.71668	8.93586	8.87845	8.9486	8.84527	9.10334	8.98977	9.00679	9.05514
ENSDARG00000019341	gpc1a	Turquoise (M1)	10.3552	10.8041	10.781	10.3863	10.6011	8.77096	8.85518	9.12667	9.018	7.82275	9.47926	10.405	10.367	10.5955	10.6542	10.7429	10.7363	10.5417
ENSDARG00000019355	coa7	Turquoise (M1)	7.18224	7.07199	7.22785	6.89749	7.12374	7.51465	7.90865	7.61483	7.72765	7.91312	7.10733	6.84923	7.08689	7.34441	7.10501	7.02171	6.90414	6.87475
ENSDARG00000019383	cdc42bpb	Turquoise (M1)	11.6942	11.8687	11.8122	11.6848	11.7762	11.0219	10.9401	11.2547	11.4927	10.9438	11.768	11.5771	11.7567	11.7508	11.767	11.809	11.7663	11.821
ENSDARG00000019392	stat5a	Turquoise (M1)	8.7975	9.0539	8.97459	9.02811	8.93856	6.79999	7.50601	7.33307	7.72119	6.91174	9.05267	8.79724	9.21144	8.67094	8.40386	8.4968	8.40821	8.39557
ENSDARG00000019398	psma6a	Turquoise (M1)	8.26058	8.34237	8.34206	8.28678	8.33733	9.70307	9.701	9.49757	9.46099	10.1027	9.44149	8.86257	8.56846	8.48818	8.26308	8.30805	8.46775	8.30984
ENSDARG00000019404	atp5f1d	Turquoise (M1)	9.47557	9.74726	10.0691	9.54531	9.74761	10.8484	10.9015	10.6077	10.6482	11.3331	10.0813	9.87249	9.71765	9.93093	9.65754	9.68832	9.58213	9.63545
ENSDARG00000019417	gadd45ga	Turquoise (M1)	8.90436	9.16146	9.15926	9.06407	9.11047	10.4818	10.7389	10.5199	10.6717	11.3276	9.39896	9.69278	9.61893	9.54618	9.41624	8.63376	9.27508	8.17936
ENSDARG00000019426	trioa	Turquoise (M1)	14.0636	14.3052	14.3703	14.0893	14.2022	12.4666	12.4132	12.9792	12.9369	12.0457	13.6391	13.9492	14.0303	14.0972	14.1491	14.1374	14.2644	14.2226
ENSDARG00000019442	AMOTL1	Turquoise (M1)	6.99838	6.84777	6.80748	6.89749	6.82008	6.07807	6.29597	6.63717	6.51577	6.01739	6.97001	6.67354	6.68605	6.74556	7.10501	7.10656	7.53904	7.03693
ENSDARG00000019451	pcsk2	Turquoise (M1)	11.6471	11.9401	12.2019	11.8421	11.9309	10.0337	10.0228	10.5632	10.6209	9.41006	11.0957	11.5747	11.687	11.7038	11.5485	11.742	11.6155	11.714
ENSDARG00000019457	tfe3b	Turquoise (M1)	8.29731	7.74462	7.77605	8.16533	7.96493	6.83592	7.13437	7.31611	7.34527	6.56157	8.39166	8.21035	7.77389	7.93349	7.83921	7.97767	8.06104	8.27832
ENSDARG00000019484	zdhhc7	Turquoise (M1)	9.08993	9.0014	9.14474	8.93585	9.03176	7.80918	7.87755	7.98909	8.33309	7.72626	9.02373	8.89416	9.1282	8.88722	9.04273	8.87382	8.98078	8.97237
ENSDARG00000019487	tmx1	Turquoise (M1)	7.81277	8.06314	8.08179	7.91535	7.99728	9.1922	9.21853	8.98004	8.90071	9.31432	8.58255	8.30757	8.01752	8.04926	7.99012	7.87563	8.01608	7.96482
ENSDARG00000019501	pcnxl3	Turquoise (M1)	11.1964	11.3475	11.3737	11.3644	11.2491	9.88273	10.2703	10.3411	10.4996	9.72332	11.0511	11.1087	11.2038	11.2484	11.2859	11.1759	11.3608	11.3414
ENSDARG00000019521	mpx	Turquoise (M1)	6.88827	7.03705	7.55071	6.16991	6.8493	9.42484	10.2869	7.77157	8.43487	9.33181	6.92815	6.36583	6.33313	6.89742	6.13198	6.27557	6.79977	5.47689
ENSDARG00000019525	tbcelb	Turquoise (M1)	9.12093	8.98046	8.85778	9.05435	8.97463	7.41678	7.30444	7.62857	7.57109	6.851	8.58915	9.06112	8.52312	8.73799	9.02891	8.87382	9.09292	8.77981
ENSDARG00000019529	parp1	Turquoise (M1)	10.7926	10.7282	10.84	10.8823	10.8382	10.1191	10.173	10.2337	10.3245	9.81631	10.562	10.7413	10.7499	10.7199	10.778	10.7331	10.7611	10.9053
ENSDARG00000019549	cds1	Turquoise (M1)	8.01786	8.01671	7.93709	7.87895	7.98443	6.75056	7.12369	6.93626	7.37865	6.57685	8.24027	7.89772	7.86184	7.91034	8.03245	8.03678	7.96374	7.99751
ENSDARG00000019572	taf7	Turquoise (M1)	9.79023	9.78222	9.75735	9.97571	9.84991	10.1589	10.0728	10.171	10.1516	10.5369	9.76349	9.59695	9.72932	9.66967	9.78627	9.65114	9.71766	9.74108
ENSDARG00000019588	chico	Turquoise (M1)	10.9854	10.9209	11.0043	11.005	10.9025	8.33693	8.544	8.44837	8.95919	8.0835	10.6925	10.8166	10.7589	10.8237	10.8416	10.6923	10.7754	10.7364
ENSDARG00000019595	senp8	Turquoise (M1)	7.27206	7.58621	7.1415	7.42191	7.39269	6.44087	6.33485	6.63717	6.68906	6.15036	7.24931	7.35876	7.28333	7.42058	7.34997	7.14712	7.79411	7.53592
ENSDARG00000019636	yif1a	Turquoise (M1)	8.88843	8.87741	8.74995	8.99463	8.89474	9.49229	9.81316	9.33447	9.35304	9.7512	9.24039	8.94028	8.82027	8.86039	8.65424	8.593	8.75046	8.67895
ENSDARG00000019651	zgc:162239	Turquoise (M1)	4.83168	4.85417	4.49276	4.53257	4.67012	5.06755	5.11696	5.66895	5.23277	5.24884	4.79455	4.70437	4.82872	4.7379	4.54163	4.95218	4.75298	4.78628
ENSDARG00000019658	pou2f2a	Turquoise (M1)	11.0323	11.4385	11.3215	11.4051	11.2637	9.67754	9.93536	9.97682	10.3202	9.25825	10.6678	10.7959	10.9019	11.05	11.3834	11.4228	11.3686	11.3087
ENSDARG00000019709	rhoua	Turquoise (M1)	9.4568	9.28612	9.56373	9.37888	9.44074	8.02797	7.56989	8.28534	7.92027	7.44771	8.38027	9.10451	9.34318	9.03044	9.14557	9.09123	9.24628	9.14798
ENSDARG00000019715	metap1d	Turquoise (M1)	7.36814	7.07199	7.03885	6.86755	7.08771	8.15873	7.83931	7.50727	7.59251	8.03609	7.10733	7.24772	7.11817	7.10819	7.45811	7.29342	7.27658	7.2162
ENSDARG00000019726	celsr2	Turquoise (M1)	12.1525	12.4339	12.6573	11.8829	12.2921	11.2879	11.2651	12.0549	11.1883	10.7623	11.553	12.2384	12.2079	12.3386	12.2679	12.4049	12.5193	12.3161
ENSDARG00000019732	mtch2	Turquoise (M1)	10.2092	10.1331	10.1597	10.3602	10.2427	10.8767	10.9198	10.6129	10.7557	11.1786	10.4351	10.1183	10.2959	10.1533	10.2343	10.102	10.2411	10.2025
ENSDARG00000019743	dctn1a	Turquoise (M1)	10.3825	10.98	11.102	10.2225	10.6865	9.49777	9.59277	9.98214	10.1752	9.01732	10.3299	10.563	10.9078	10.7704	10.3719	10.4806	10.8029	10.6095
ENSDARG00000019774	zhx3	Turquoise (M1)	10.1268	10.0394	10.2741	10.0541	10.1368	8.96825	8.95349	9.45802	9.35511	8.85129	9.52812	9.7413	9.73098	9.97184	10.0084	10.1385	10.1903	10.0711
ENSDARG00000019791	prmt3	Turquoise (M1)	7.67012	7.60208	7.44311	7.51065	7.55878	9.16259	9.23816	8.74649	9.19756	9.02002	8.40296	8.07874	7.74112	7.57645	8.05316	7.82351	7.77395	8.29417
ENSDARG00000019842	cnot3b	Turquoise (M1)	10.5036	10.6212	10.6304	10.5263	10.5747	10.2253	10.4238	10.1998	10.2695	10.0322	10.3887	10.6073	10.4327	10.5973	10.5756	10.6101	10.6996	10.6933
ENSDARG00000019877	rbks	Turquoise (M1)	6.85513	6.22279	6.57453	6.69004	6.56061	7.6265	7.04656	7.69536	7.45098	7.72626	6.79434	6.36583	6.62841	6.51249	6.31209	6.20869	6.61111	6.64075
ENSDARG00000019881	bsg	Turquoise (M1)	12.7805	12.771	12.6974	12.6752	12.7647	13.3986	13.4673	13.3591	13.1025	13.817	13.1474	12.929	12.7241	12.814	12.7744	12.7193	12.5849	12.6752
ENSDARG00000019897	gpat4	Turquoise (M1)	9.9192	9.90469	9.96839	9.93042	9.94872	10.5092	10.3592	10.4593	10.1575	10.6361	9.66706	9.88302	9.93047	9.91799	9.85637	9.79176	9.88887	9.91297
ENSDARG00000019924	cmpk	Turquoise (M1)	10.0679	9.97286	10.013	10.1874	10.0928	10.8181	11.1796	10.4458	10.8306	11.127	10.5861	10.0405	10.0429	10.0304	9.99068	10.0022	9.99074	10.0055
ENSDARG00000019930	tal1	Turquoise (M1)	7.27206	7.31428	7.22785	7.86412	7.42176	8.77999	8.41176	8.30677	8.09992	8.7956	7.82935	7.06269	7.46372	7.27305	7.17038	6.93799	7.48201	7.18214
ENSDARG00000019941	sgta	Turquoise (M1)	10.4409	10.2312	10.3655	10.5667	10.417	10.8195	10.7779	10.6077	10.7783	10.8821	10.3801	10.2812	10.3997	10.2133	10.3869	10.2015	10.3352	10.3178
ENSDARG00000019963	sfxn1	Turquoise (M1)	9.81149	9.92047	9.87627	9.77553	9.79234	8.13069	8.63576	8.69875	8.91485	8.01993	9.70398	9.25394	9.95197	9.77706	9.78832	9.7691	9.61816	9.75827
ENSDARG00000019969	smarcd3b	Turquoise (M1)	10.7101	10.7531	10.7147	10.6225	10.711	10.2065	10.027	10.1236	10.2956	10.5035	10.5065	10.6602	10.6648	10.7744	10.8709	11.0481	10.8355	10.9983
ENSDARG00000019998	slc30a7	Turquoise (M1)	9.17445	9.07098	9.35478	9.21706	9.21006	10.0499	10.288	9.76476	10.049	10.516	9.55195	9.33477	9.13574	9.35033	9.25942	9.23448	9.31261	9.19927
ENSDARG00000020001	rad23aa	Turquoise (M1)	9.1141	9.24909	9.38184	9.29062	9.28505	8.477	8.21733	8.78967	8.80068	8.0835	9.59518	9.12017	9.10278	9.45954	9.0044	9.09707	9.24628	9.12164
ENSDARG00000020015	mrps33	Turquoise (M1)	7.32092	7.5125	7.11149	7.27173	7.34286	8.36926	8.35884	7.94049	7.9755	8.70781	7.13507	7.04372	7.49561	7.29124	7.03642	7.18654	7.13505	7.15896
ENSDARG00000020024	fam151b	Turquoise (M1)	8.0105	7.9	7.61579	7.87155	7.85618	8.38516	8.63946	8.25039	8.54091	8.95939	7.72478	7.89772	7.43932	7.71017	7.80701	7.77675	7.6975	7.66406
ENSDARG00000020054	aox6	Turquoise (M1)	8.57655	8.66499	8.59114	8.88192	8.71255	7.80326	7.36889	7.93499	7.15572	7.39825	8.71827	9.27807	9.05054	9.33743	9.05982	9.01466	8.63286	9.25957
ENSDARG00000020057	bmpr2b	Turquoise (M1)	11.4866	11.66	11.7711	11.4649	11.56	9.33991	9.48192	9.82374	9.96597	8.92233	11.4212	11.316	11.4797	11.5377	11.5527	11.669	11.754	11.6933
ENSDARG00000020080	ek1	Turquoise (M1)	12.3067	12.2819	12.2894	12.1146	12.225	11.0772	11.3005	11.4043	11.8303	10.9049	11.6602	12.0508	12.0629	12.1075	12.1312	12.4061	12.5019	12.4121
ENSDARG00000020084	tg	Turquoise (M1)	5.17407	5.00613	5.32907	5.05986	5.16471	7.19793	7.73202	7.12447	7.10654	8.01993	6.12515	5.96253	7.33727	5.89278	4.81693	5.21258	5.41006	5.78186
ENSDARG00000020102	kctd16b	Turquoise (M1)	7.3797	7.48705	7.61579	7.29419	7.45025	6.42494	5.9332	6.45861	6.41993	5.96971	7.03053	7.33569	7.43109	7.45316	7.47878	7.59355	7.58615	7.51792
ENSDARG00000020114	slc20a1a	Turquoise (M1)	7.40254	6.93933	7.16116	9.07051	7.59318	9.97859	9.61545	8.92856	10.1575	9.57885	8.15367	7.30433	7.88601	6.71853	6.63065	6.56668	8.09387	6.15277
ENSDARG00000020131	fnbp1l	Turquoise (M1)	10.631	10.5172	10.6042	10.693	10.6475	9.59813	9.36408	9.91697	9.86627	9.32746	10.1829	10.4446	10.4689	10.4231	10.3033	10.2356	10.4117	10.1557
ENSDARG00000020134	sipa1l1	Turquoise (M1)	13.998	14.0371	14.2396	14.1773	14.1189	12.7938	12.9102	13.0958	13.1178	12.402	13.1041	13.5499	13.8557	13.8834	13.7916	13.764	13.931	13.7945
ENSDARG00000020149	acoxl	Turquoise (M1)	9.26973	9.24909	9.1078	9.16985	9.13963	7.5219	7.62351	7.84978	8.03387	7.21003	9.70094	9.21489	9.30134	9.04904	9.32873	9.11875	9.16908	9.36062
ENSDARG00000020176	zbtb22a	Turquoise (M1)	8.32129	8.71297	9.02303	8.33047	8.62444	7.1231	7.32316	7.50727	7.86868	6.8004	8.05193	8.35382	8.56846	8.64321	8.33801	8.69283	8.63286	8.66279
ENSDARG00000020178	nova1	Turquoise (M1)	10.2595	10.7111	10.8089	10.6082	10.6198	8.42798	8.38554	8.81973	9.499	8.33472	10.7429	10.1675	10.5614	10.6915	10.5921	10.9492	10.5788	10.7838
ENSDARG00000020217	cpsf4	Turquoise (M1)	8.67742	8.44218	8.25895	8.4688	8.47665	8.8786	8.94455	8.94502	8.82485	8.68074	8.60554	8.6415	8.28572	8.55668	8.53205	8.42425	8.45099	8.50849
ENSDARG00000020231	mapre3a	Turquoise (M1)	10.3896	10.6067	10.3759	10.9537	10.5938	8.49541	8.30856	8.55238	8.79151	7.83513	9.9645	10.3949	10.1853	10.4272	10.7821	10.4318	10.4637	10.2865
ENSDARG00000020232	eif6	Turquoise (M1)	8.23555	8.0914	8.03517	8.27565	8.17738	9.65483	9.73419	9.56827	9.39397	10.1254	9.26119	8.74333	8.37356	8.42033	8.12008	8.03373	8.18804	8.30984
ENSDARG00000020241	icmt	Turquoise (M1)	7.98817	7.56206	7.55071	7.69835	7.71524	8.19979	8.4502	8.23259	8.01292	8.06787	7.8789	7.72019	7.53449	7.78219	7.47878	7.48552	7.88458	7.6057
ENSDARG00000020301	os9	Turquoise (M1)	10.0394	10.0102	10.1597	10.1545	10.1193	10.669	10.5702	10.2754	10.5904	10.6175	10.3494	10.2224	9.79584	10.0944	9.85637	9.96043	10.0777	9.83229
ENSDARG00000020311	cnih1	Turquoise (M1)	10.3768	10.2325	10.3081	10.3876	10.35	10.927	10.9206	10.5381	10.7191	11.232	10.5477	10.4321	10.2959	10.3361	10.3261	10.2487	10.3723	10.3672
ENSDARG00000020387	nipsnap3a	Turquoise (M1)	6.2785	5.72527	5.52234	6.16991	5.90032	8.21322	7.66792	8.18709	7.8745	8.74096	7.2744	7.00499	6.48894	6.44731	6.21228	6.29711	6.15039	6.2247
ENSDARG00000020397	snx15	Turquoise (M1)	8.63982	8.72741	8.70445	8.8965	8.75843	9.03012	9.01168	8.99855	9.24979	9.23054	8.75396	8.70821	8.60154	8.65714	8.68984	8.63175	8.66952	8.57912
ENSDARG00000020443	xkr6a	Turquoise (M1)	9.43778	9.56046	9.70393	9.55682	9.48684	7.24275	7.53831	7.67565	7.83918	6.89981	8.65359	8.98251	9.38174	9.06739	9.37315	9.50411	9.52733	9.4074
ENSDARG00000020454	psmd8	Turquoise (M1)	9.83659	9.8079	9.73815	9.83912	9.83038	10.8369	10.9394	10.725	10.8513	11.1762	10.4614	10.024	9.91887	9.89764	9.95826	9.69122	9.63492	9.91638
ENSDARG00000020465	ewsr1b	Turquoise (M1)	10.5587	10.8278	10.7406	10.6027	10.7187	11.7359	11.8551	11.5139	11.4129	12.0765	10.933	10.8901	10.8139	10.6719	10.7435	10.8066	10.8078	10.8689
ENSDARG00000020482	nono	Turquoise (M1)	10.3567	10.3279	10.5289	10.3863	10.4206	10.6843	10.8845	10.8275	10.9506	11.0131	10.6955	10.5841	10.3997	10.4543	10.5529	10.4155	10.3134	10.5505
ENSDARG00000020494	znf330	Turquoise (M1)	8.65404	8.57198	8.44851	8.47368	8.57399	9.35609	9.65248	9.13864	9.45326	9.76575	8.99172	8.55845	8.65855	8.43659	8.54669	8.35274	8.30468	8.30464
ENSDARG00000020504	h3f3b.1	Turquoise (M1)	10.9213	10.7291	10.7795	10.7662	10.8176	12.048	12.3821	11.8621	11.893	12.5334	11.2299	11.1248	10.9849	10.8121	10.8116	10.7341	10.8127	10.8732
ENSDARG00000020527	nup62l	Turquoise (M1)	9.20691	9.31268	9.22972	9.44975	9.31858	9.87152	9.96215	9.8326	9.83244	10.2616	9.5704	9.42397	9.1282	9.56659	9.18037	9.1681	9.16396	9.31227
ENSDARG00000020594	txlnba	Turquoise (M1)	4.16044	4.76265	5.14064	4.89868	4.78307	5.34661	5.40971	5.69866	5.79119	6.57685	5.15154	4.7873	4.82872	5.14793	4.81693	5.02565	4.75298	4.78628
ENSDARG00000020595	gnl3l	Turquoise (M1)	8.66344	8.47681	8.45638	8.68175	8.59101	9.40164	9.92783	9.26848	9.43964	9.408	8.62173	8.43491	8.37356	8.29664	8.63611	8.30553	8.68034	8.65055
ENSDARG00000020607	emc3	Turquoise (M1)	10.7732	10.588	10.6799	10.833	10.7436	11.2731	11.3492	10.9702	11.1132	11.38	10.8107	10.554	10.6872	10.529	10.6497	10.4694	10.651	10.5494
ENSDARG00000020618	gatd3a	Turquoise (M1)	8.08951	8.35173	8.11703	8.57242	8.31189	9.06255	8.99447	8.69226	8.52623	9.10643	8.35722	8.30365	8.19697	7.94493	8.58974	8.3231	7.96374	8.11533
ENSDARG00000020621	ap1b1	Turquoise (M1)	11.7732	11.7444	11.7934	11.79	11.7878	11.1756	11.2805	11.3244	11.7756	11.2073	11.8857	11.5377	11.6755	11.5656	11.6147	11.625	11.7364	11.7445
ENSDARG00000020693	sesn1	Turquoise (M1)	11.8867	11.7492	11.8578	11.7599	11.8304	11.3916	11.0378	11.5684	11.6227	10.8483	11.6105	12.0341	11.5225	11.684	11.8712	12.0088	11.8087	11.6417
ENSDARG00000020718	slc25a22a	Turquoise (M1)	11.7481	11.7112	11.8747	11.7514	11.7664	9.06993	9.24545	9.38958	9.68197	8.79245	11.2984	11.4774	11.7789	11.6996	11.7602	11.5587	11.8238	11.7188
ENSDARG00000020771	tnr	Turquoise (M1)	11.7802	11.8728	12.0516	11.7594	11.86	9.23441	9.20862	9.82225	9.94822	8.95093	10.775	11.1711	11.5008	11.578	11.5767	11.9209	11.8908	11.8858
ENSDARG00000020795	rac3b	Turquoise (M1)	12.4176	12.7607	12.6383	12.4416	12.5986	11.6691	11.8347	11.6354	11.6953	11.339	12.1788	12.4261	12.7981	12.5188	12.443	12.7001	12.8638	12.552
ENSDARG00000020820	srp68	Turquoise (M1)	10.0976	10.0249	10.0627	10.1711	10.1061	10.5909	10.576	10.1055	10.5745	10.7189	10.4351	10.1382	10.156	10.2157	10.1697	10.0413	10.0805	10.1829
ENSDARG00000020841	rbm7	Turquoise (M1)	8.06839	8.18878	7.94833	7.84914	8.03516	8.76793	8.52413	8.4713	8.35403	8.71116	8.12207	7.89249	8.13795	7.95062	7.83921	8.05796	8.07207	8.03578
ENSDARG00000020872	nfat5a	Turquoise (M1)	10.701	11.0303	10.8894	10.833	10.7341	9.10388	9.79506	9.98346	9.79474	9.27869	10.4828	10.7113	10.7251	10.8322	10.9147	11.0794	10.9721	11.0527
ENSDARG00000020891	LO018197.1	Turquoise (M1)	7.76094	7.93165	7.91435	8.17735	7.96493	7.76108	7.72504	7.82617	8.13426	7.52648	7.97816	7.94895	8.12281	8.04395	8.09369	8.02761	8.13649	8.01038
ENSDARG00000020944	ezra	Turquoise (M1)	5.30345	5.18916	4.82077	5.36297	5.10212	6.35922	6.67138	6.02879	5.64564	6.28973	5.65807	5.64206	5.73304	4.7379	5.53796	5.12431	5.36712	5.33551
ENSDARG00000020957	pth1ra	Turquoise (M1)	5.56721	5.38599	5.59062	5.88418	5.59438	4.94917	4.84288	4.72677	5.13429	4.9727	5.714	5.34994	5.53787	5.72662	5.98563	5.58068	5.27513	5.90845
ENSDARG00000020960	hgs	Turquoise (M1)	11.0812	11.0655	11.4301	11.4272	11.2717	10.0019	10.0354	10.3545	10.6252	9.72497	10.9606	11.048	11.0693	11.3261	11.2822	11.053	11.3141	11.2018
ENSDARG00000020964	thap12b	Turquoise (M1)	8.13084	8.05167	8.02989	8.29783	8.13153	8.69656	8.4794	8.73392	8.51512	8.84825	8.18894	8.5319	8.07113	8.21412	8.33801	8.23033	8.38191	8.30464
ENSDARG00000020979	ripor3	Turquoise (M1)	6.35364	6.64397	6.34682	7.3163	6.64715	7.73018	8.15656	8.31947	7.49722	8.01993	7.02063	6.62259	6.75482	5.91834	6.33588	6.76867	7.22766	7.2162
ENSDARG00000020984	slc16a10	Turquoise (M1)	7.41383	7.96873	7.80108	7.834	7.76127	9.62842	8.58295	9.16228	8.92327	9.43455	8.82839	8.55845	7.9955	7.71017	7.53904	7.60598	7.6975	7.57124
ENSDARG00000020986	ctu1	Turquoise (M1)	8.41894	8.55182	8.82475	8.55413	8.60782	7.4011	7.66061	7.54404	8.03387	7.38137	8.4938	8.51506	8.32592	8.6606	8.7793	8.56797	8.71232	8.65055
ENSDARG00000021046	rhbdd1	Turquoise (M1)	6.78635	6.65958	6.55949	6.80563	6.7126	7.82681	7.89007	7.45414	7.24011	7.9981	6.92815	7.20583	7.21766	6.9675	6.47027	6.89072	7.00115	6.64075
ENSDARG00000021107	sf3a2	Turquoise (M1)	7.95015	8.55182	8.51784	8.41911	8.39663	9.51949	9.43168	9.15993	9.17659	9.63628	8.72428	8.69332	8.46435	8.36195	8.44614	8.25671	8.34609	8.53539
ENSDARG00000021112	c1d	Turquoise (M1)	7.45808	7.64866	7.19966	7.29419	7.43132	8.5668	8.61337	8.01017	8.37467	8.97061	7.68814	7.46168	7.51129	7.37877	7.40508	7.36367	7.34233	7.39502
ENSDARG00000021124	cfl1	Turquoise (M1)	13.4898	13.4791	13.2595	13.3365	13.431	14.3185	14.5685	14.0475	14.0968	14.654	14.1003	13.5138	13.6785	13.5867	13.3855	13.4064	13.3877	13.3742
ENSDARG00000021137	adgrv1	Turquoise (M1)	11.4686	11.0017	11.053	10.778	11.0609	9.27966	9.10819	9.88466	9.81898	9.58251	11.4486	11.1652	11.1334	11.2841	11.7354	11.6692	11.389	11.6702
ENSDARG00000021209	kctd9a	Turquoise (M1)	7.6029	7.80061	7.72461	7.99232	7.73844	7.03382	7.26624	7.16305	7.23098	6.49865	7.37051	7.64746	7.58719	7.68304	7.86289	7.75834	7.78742	7.57993
ENSDARG00000021288	mier3b	Turquoise (M1)	9.23552	9.28612	9.40028	9.27398	9.31091	8.20428	8.73935	8.65271	8.59816	8.00906	8.80022	9.23146	9.1079	9.2666	9.306	9.2064	9.35595	9.35058
ENSDARG00000021343	wsb1	Turquoise (M1)	11.419	11.1963	11.3253	11.2192	11.3208	12.0408	12.3439	12.0343	11.7249	12.291	11.2145	11.2233	11.2198	10.9328	11.1216	11.1375	11.1773	11.1636
ENSDARG00000021378	phf21ab	Turquoise (M1)	9.71777	10.0307	9.90668	9.86156	9.87092	9.25614	9.77506	9.60495	9.61258	8.94525	9.56873	9.99274	9.9534	10.0893	10.0345	10.1851	10.0123	10.1427
ENSDARG00000021398	mul1a	Turquoise (M1)	7.99565	8.36104	8.40036	8.66054	8.37714	7.61299	7.89629	7.97843	8.11474	7.26643	7.92678	8.70821	8.06586	8.56409	8.48214	8.6986	8.61417	8.65872
ENSDARG00000021402	mcm3ap	Turquoise (M1)	10.3768	10.4005	10.3769	10.5461	10.4289	10.0721	10.1421	10.1605	10.1611	9.65028	10.2447	10.4303	10.2779	10.3491	10.5601	10.4347	10.4501	10.6043
ENSDARG00000021442	cdh11	Turquoise (M1)	11.8476	11.6219	11.9279	11.4083	11.7146	10.8391	10.9461	11.4181	11.4084	10.751	11.1413	11.6817	11.6776	11.7737	11.7097	11.799	11.9369	11.7512
ENSDARG00000021539	ephb2b	Turquoise (M1)	10.3896	10.2932	10.3349	10.293	10.3261	9.27115	8.95645	9.40551	9.6902	9.24677	10.315	10.0393	10.1298	10.3766	10.2845	10.4889	10.3386	10.4341
ENSDARG00000021590	magi2a	Turquoise (M1)	11.909	12.1416	12.1544	12.3193	12.12	11.1561	11.2853	11.3421	11.6555	10.8422	11.5369	11.86	11.7493	12.0158	12.1917	12.0322	11.9608	11.9743
ENSDARG00000021607	negr1	Turquoise (M1)	12.2487	12.3621	12.241	12.1864	12.2774	10.5502	10.427	10.8488	11.0371	10.1698	11.6835	11.7444	12.051	12.0289	12.1384	12.2778	12.4057	12.2427
ENSDARG00000021611	si:dkey-151g10.3	Turquoise (M1)	11.1546	11.3157	11.444	11.3179	11.2984	9.83158	9.88803	10.1404	10.3917	9.48427	11.0074	11.0689	11.0301	11.1591	11.2206	11.2316	11.2509	11.272
ENSDARG00000021664	fzd3a	Turquoise (M1)	10.7247	10.754	10.9167	10.5541	10.7531	9.97073	10.192	10.4304	10.2339	9.408	10.2195	10.9274	10.9027	10.7478	10.8901	11.102	10.8954	10.9886
ENSDARG00000021720	col7a1	Turquoise (M1)	7.40254	7.42583	6.86906	6.86755	7.18182	8.14945	9.52849	8.07661	8.38285	8.51813	7.20647	6.30131	6.85812	6.64849	6.73955	7.13565	6.90414	6.81615
ENSDARG00000021753	ccdc25	Turquoise (M1)	7.80426	8.00487	7.85586	8.13483	7.98443	9.1967	9.03151	8.50503	8.80372	9.38095	8.41417	8.12397	7.98437	7.85075	7.78237	8.00909	7.79411	7.86909
ENSDARG00000021805	aes	Turquoise (M1)	11.0113	11.1006	11.1536	10.9957	11.0836	8.68699	8.88039	8.96935	9.31518	8.17385	10.51	10.7571	10.8631	10.9715	10.8287	10.9898	11.1458	10.875
ENSDARG00000021808	nmt2	Turquoise (M1)	10.8625	10.8616	10.8872	10.9736	10.9278	10.1738	10.281	10.4838	10.5182	9.75445	10.3811	10.7091	10.6279	10.7902	10.8631	10.8066	10.9085	10.8387
ENSDARG00000021846	hid1a	Turquoise (M1)	10.2626	10.4793	10.5092	10.385	10.43	8.89532	9.45073	9.46374	9.51949	8.66009	9.70398	9.94458	10.2869	10.2436	10.3936	10.3327	10.5139	10.0863
ENSDARG00000021855	arnt	Turquoise (M1)	10.4355	10.4184	10.3655	10.3746	10.3784	9.40748	9.60226	9.85307	9.90075	9.05469	10.0386	10.2245	10.2733	10.2086	10.1869	10.2676	10.2337	10.3659
ENSDARG00000021869	rcan2	Turquoise (M1)	9.41851	9.50292	9.55095	9.63057	9.52931	7.2339	7.28547	7.59396	8.14873	7.23851	9.09963	8.67524	9.21619	9.05693	9.07335	9.31179	8.92429	8.99512
ENSDARG00000021882	fbxl3b	Turquoise (M1)	8.07547	8.63848	8.62643	8.33047	8.45358	9.2079	9.41022	9.1146	8.79763	9.34048	8.39166	8.26786	8.46435	8.53043	8.60381	8.64776	8.32323	8.56179
ENSDARG00000021899	b4galt7	Turquoise (M1)	8.96259	8.65369	8.62643	8.85604	8.7919	9.30072	9.56778	9.15287	9.43964	9.53234	8.7392	8.85724	8.94001	8.7182	8.92078	8.81834	8.89365	8.8564
ENSDARG00000021909	VSTM2A	Turquoise (M1)	8.54639	8.83803	8.56954	9.00139	8.71255	6.29003	6.14987	6.7183	7.32828	6.32694	8.68475	7.65984	8.3989	8.64671	8.12008	8.61963	8.30468	7.80397
ENSDARG00000021938	smad9	Turquoise (M1)	7.89518	7.84786	6.9622	6.96963	7.35297	10.0032	10.7662	9.91	9.81748	9.05994	7.65686	7.25595	7.69392	6.9675	7.69703	7.10656	7.02438	7.0622
ENSDARG00000021948	tnc	Turquoise (M1)	12.2463	12.0453	12.2797	11.7459	12.0894	10.7886	10.3803	11.4544	10.8028	10.5236	12.5709	11.1588	11.8243	11.7641	11.6072	11.8805	11.912	12.0672
ENSDARG00000021973	st13	Turquoise (M1)	10.5512	10.5811	10.5456	10.7291	10.6505	10.3677	10.0185	10.5043	10.0844	9.92686	10.5358	10.5123	10.5236	10.6881	10.6908	10.5417	10.6737	10.6469
ENSDARG00000021984	ndufa2	Turquoise (M1)	8.71406	8.79068	8.79406	9.00812	8.85308	9.71252	9.73246	9.48451	9.33424	10.1428	8.90973	8.78044	8.80458	8.86039	8.99376	8.47003	8.50476	8.49028
ENSDARG00000021996	ppp2r2aa	Turquoise (M1)	10.1114	10.1519	10.4446	10.113	10.1865	8.30804	8.3362	8.59823	8.70624	7.83513	10.0168	10.0545	10.0668	10.0995	10.1411	9.99598	10.1469	10.1672
ENSDARG00000022000	traf3	Turquoise (M1)	8.67742	8.74172	8.78784	8.73953	8.7433	8.19529	7.96889	8.61204	7.93149	8.18837	8.38408	8.95782	8.79825	8.76396	8.53205	8.64776	8.93035	8.68697
ENSDARG00000022101	obscnb	Turquoise (M1)	8.45188	8.53138	8.46421	8.92878	8.49936	6.71228	6.21452	7.15351	7.13625	6.72081	7.50341	7.9984	8.1873	7.93349	7.99727	8.58885	8.60284	8.33048
ENSDARG00000022165	mgst1.2	Turquoise (M1)	6.35364	6.0619	6.13522	6.80563	6.32672	7.96578	7.85856	7.93499	7.13625	8.41914	7.33126	7.3201	6.2179	6.4305	6.64942	6.45779	6.70144	6.87475
ENSDARG00000022218	uck1	Turquoise (M1)	8.10342	8.17828	8.03517	8.32508	8.1942	6.93841	6.39109	7.07469	7.08637	6.81323	8.18894	8.06488	8.30819	8.45266	8.23921	8.24094	8.40386	7.93136
ENSDARG00000022232	ppan	Turquoise (M1)	7.45808	7.72304	7.41895	7.59415	7.59318	8.57028	8.54005	8.25039	8.54819	9.06257	8.05193	7.70235	7.66624	7.62006	7.56823	7.5078	7.6975	7.8971
ENSDARG00000022303	higd1a	Turquoise (M1)	9.4941	9.30789	9.21126	9.19954	9.34135	10.1829	10.7954	9.94039	10.4207	10.5995	9.63237	9.38006	9.53402	9.34604	8.7793	8.71199	8.58759	8.42465
ENSDARG00000022315	atp6v1g1	Turquoise (M1)	11.8776	11.8043	11.7766	11.8751	11.8687	12.3031	12.5927	12.2023	12.4164	12.8437	11.7756	11.5956	11.8417	11.487	11.6348	11.4797	11.6327	11.3325
ENSDARG00000022340	ufc1	Turquoise (M1)	8.4355	8.16239	8.22246	8.30879	8.31189	8.8097	9.44018	8.64601	9.28938	9.55299	8.4832	8.14166	8.38629	8.03863	7.99727	8.07883	7.93985	7.8187
ENSDARG00000022399	ntmt1	Turquoise (M1)	7.68875	7.52088	7.44311	7.93676	7.66767	9.03264	9.18099	8.35691	8.88355	8.9367	8.22336	7.83371	7.70757	7.89862	7.53904	7.42122	7.4226	7.4905
ENSDARG00000022413	ing5a	Turquoise (M1)	8.20365	8.3886	8.5328	8.41911	8.43955	6.75056	6.74383	6.93626	6.90198	6.21195	7.74869	8.06488	8.03921	8.01713	8.09369	8.09355	8.41254	8.1907
ENSDARG00000022438	cox6a1	Turquoise (M1)	10.3186	10.512	10.5801	10.3629	10.4878	11.4906	11.2752	11.2749	10.9978	11.7629	10.7302	10.5704	10.5743	10.7049	10.395	10.4387	10.3397	10.4257
ENSDARG00000022493	rad21l1	Turquoise (M1)	5.41727	5.2927	5.32907	5.67335	5.4257	6.44087	6.40931	5.96024	6.57604	7.05821	5.84299	5.58372	5.53787	5.14793	5.85457	5.54127	5.36712	5.38488
ENSDARG00000022564	zgc:56106	Turquoise (M1)	7.59303	7.56206	7.41895	7.56686	7.57608	8.30386	8.3132	8.21002	7.99165	8.61073	7.47494	7.42578	7.49561	7.42058	7.45811	7.21947	7.63174	7.55369
ENSDARG00000022623	fbxo44	Turquoise (M1)	8.57157	8.66124	8.52534	8.55413	8.59523	8.94435	8.86784	8.94774	8.96463	9.408	8.58915	8.50144	8.72344	8.46063	8.53205	8.45872	8.56051	8.43897
ENSDARG00000022684	fkbp1aa	Turquoise (M1)	12.0654	11.9877	12.1028	11.978	12.0687	12.8678	13.0071	12.5829	12.6961	13.2717	12.1002	11.9668	12.0517	12.0202	11.9141	11.7296	11.8799	11.8884
ENSDARG00000022718	casp8ap2	Turquoise (M1)	9.98616	9.90786	9.98613	10.1725	10.01	9.47201	9.62852	9.60667	9.63836	9.06257	10.002	10.0275	9.60994	10.0089	9.73827	9.70083	9.96152	10.0433
ENSDARG00000022730	aasdh	Turquoise (M1)	8.13084	8.00487	7.91435	8.02598	8.00367	7.14219	7.04656	7.32462	7.35369	6.8004	7.80677	7.89772	7.84345	8.02792	8.0668	8.08178	7.82708	7.72012
ENSDARG00000022788	cops7a	Turquoise (M1)	9.61753	9.70049	9.59608	9.75169	9.68572	10.2042	10.2739	10.1416	9.93858	10.5112	9.69789	9.57278	9.56784	9.73997	9.70825	9.4764	9.52733	9.46206
ENSDARG00000022795	golt1ba	Turquoise (M1)	7.81277	7.38042	7.58724	7.49141	7.57608	8.49175	8.29923	8.0816	8.12941	8.70781	7.59217	7.81725	7.61645	7.3617	7.50923	7.42122	7.58615	7.57993
ENSDARG00000022845	lias	Turquoise (M1)	8.69585	8.53959	8.51407	8.63901	8.6203	9.07727	9.07583	8.8979	9.06186	9.1391	8.55245	8.41688	8.3989	8.32312	8.37131	8.26453	8.36411	8.33559
ENSDARG00000022904	skilb	Turquoise (M1)	10.0802	10.3467	10.6562	10.2903	10.36	8.40867	8.22721	8.8979	8.81281	7.88957	9.38765	9.50626	9.59179	9.36312	9.58151	9.93297	9.62003	9.5828
ENSDARG00000022905	znf1163	Turquoise (M1)	6.8718	6.93933	7.16116	7.02475	7.02549	6.35922	6.05819	6.25222	6.72912	6.28973	6.74667	7.14501	7.1688	6.93291	6.77399	7.18654	7.13505	6.83104
ENSDARG00000022918	tbcc	Turquoise (M1)	8.11033	7.79373	8.03517	7.91535	7.97796	8.3891	8.22721	8.37729	8.25059	8.78611	7.77802	8.03203	7.93892	7.96754	7.74885	7.86536	7.81399	7.80397
ENSDARG00000022939	ino80e	Turquoise (M1)	7.23427	6.83418	7.24634	7.16595	7.14726	7.4778	7.49782	7.29895	7.35369	7.74609	7.08852	7.29638	6.94256	7.03421	6.97901	7.10656	7.27658	7.23846
ENSDARG00000023110	mapk7	Turquoise (M1)	9.40458	9.54017	9.34846	9.74365	9.52048	9.15798	9.07036	9.54149	9.31091	9.13661	9.44876	9.42756	9.38806	9.65068	9.67759	9.62614	9.61253	9.61042
ENSDARG00000023117	gopc	Turquoise (M1)	9.48089	9.28855	9.43051	9.18773	9.37116	7.83844	8.03234	8.30251	8.41907	7.65109	9.15182	9.28602	9.32571	9.20873	9.36492	9.33913	9.49096	9.41465
ENSDARG00000023190	kpna4	Turquoise (M1)	11.5455	11.6005	11.7207	11.6854	11.6694	11.1293	11.3655	11.4453	11.6517	11.0986	11.6598	11.6582	11.7103	11.7147	11.6095	11.4977	11.6525	11.6758
ENSDARG00000023214	mob2a	Turquoise (M1)	8.01786	7.88067	7.77605	8.07181	7.91159	7.37725	7.09116	7.41493	7.7783	7.01477	8.21911	8.11055	8.09203	8.02792	7.99727	8.12541	8.16764	8.07305
ENSDARG00000023217	crema	Turquoise (M1)	9.23552	9.23148	9.37771	9.27398	9.32367	7.22499	7.09116	7.66902	8.00233	7.28473	9.16512	8.68431	9.0291	8.8813	8.41986	8.69283	8.65862	8.25151
ENSDARG00000023220	selenot2	Turquoise (M1)	10.701	10.6706	10.6957	10.7147	10.7216	11.3197	11.663	10.9974	11.1326	11.5008	10.674	10.5466	10.6508	10.6223	10.6096	10.5406	10.7155	10.6973
ENSDARG00000023236	kcnh1a	Turquoise (M1)	6.14266	6.67502	5.93122	6.33737	6.21546	4.94917	4.9217	5.17973	5.13429	4.73853	6.35553	6.33397	6.40466	6.74556	6.57273	6.76867	6.49744	6.73921
ENSDARG00000023267	atad1a	Turquoise (M1)	9.41851	9.36207	9.25696	9.49593	9.40517	8.09242	8.26127	8.33206	8.5114	7.7721	9.15627	8.94028	9.16306	9.14351	9.27121	9.10143	9.25594	9.17954
ENSDARG00000023290	fabp3	Turquoise (M1)	10.7169	10.8518	10.6757	10.9632	10.831	11.3788	11.5699	11.1534	11.2514	12.0936	11.6213	10.7113	10.7958	10.8966	10.6497	10.6443	10.7586	10.7431
ENSDARG00000023298	rps27.1	Turquoise (M1)	10.2549	10.5068	10.3371	10.331	10.3772	12.1252	12.5691	11.8932	11.5016	12.7083	11.4756	11.314	10.5586	10.9847	10.6212	10.4341	10.3099	10.2288
ENSDARG00000023309	spryd4	Turquoise (M1)	7.6029	7.43474	7.52833	7.6815	7.60165	8.09242	7.9209	7.94597	8.10982	8.5854	7.43112	7.46875	7.33727	7.57645	7.50923	7.32898	7.44837	7.43399
ENSDARG00000023323	ywhaqb	Turquoise (M1)	14.2259	14.061	14.1405	14.2321	14.1952	14.4755	14.4408	14.3553	14.4711	14.9121	14.1719	13.9213	14.1621	14.0601	14.0457	13.9796	14.1773	14.1604
ENSDARG00000023369	mxd	Turquoise (M1)	6.42471	6.26527	6.61866	5.81804	6.26112	7.39319	6.67138	7.57278	6.81827	6.74786	6.38761	6.39694	6.15618	6.08376	5.92187	6.29711	5.98522	5.99536
ENSDARG00000023394	slc37a2	Turquoise (M1)	10.6734	10.6038	10.7293	10.569	10.6556	11.4053	11.2458	11.2722	10.8313	11.0799	10.8086	11.0065	10.5854	10.3469	10.4452	10.356	10.5575	10.4376
ENSDARG00000023396	atg5	Turquoise (M1)	9.48619	9.33406	9.3839	9.50784	9.44308	9.76497	9.63223	9.48075	9.59689	9.73322	9.48457	9.393	9.26971	9.26887	9.46322	9.2424	9.29631	9.21873
ENSDARG00000023495	ift74	Turquoise (M1)	9.24493	9.32222	9.45031	9.27955	9.36129	10.2363	10.0298	10.1356	10.4665	10.5648	9.24039	9.21905	9.09506	9.0224	9.16781	9.16394	9.23655	8.98542
ENSDARG00000023526	ggt1a	Turquoise (M1)	4.93326	4.76265	4.89714	4.80149	4.87758	6.48755	7.28547	6.23345	7.20323	7.27561	5.36317	5.34994	4.97537	4.90271	4.81693	4.91247	4.84308	4.78628
ENSDARG00000023532	pinx1	Turquoise (M1)	7.3797	7.4436	7.27362	7.56686	7.45961	9.21679	9.31871	8.65938	8.70624	9.59342	7.92678	7.5443	7.62367	7.74336	7.47878	7.57681	7.44837	7.39502
ENSDARG00000023536	nnt	Turquoise (M1)	12.6295	12.6731	12.8603	12.706	12.7385	12.3174	12.3182	12.3707	12.5886	12.1252	12.7534	12.5403	12.6198	12.6856	12.5942	12.632	12.5552	12.6337
ENSDARG00000023583	coq9	Turquoise (M1)	8.72307	8.8903	9.0124	8.8448	8.89132	9.4439	9.08399	9.02459	9.14337	9.32528	8.99172	8.96031	8.7662	8.93656	8.81599	8.78617	8.72978	8.74569
ENSDARG00000023672	timm8a	Turquoise (M1)	7.73429	7.39876	7.25549	7.6472	7.53241	8.47329	8.44598	8.16379	8.31611	8.85432	7.53821	7.32792	7.38921	7.42058	7.31584	7.33399	7.4226	7.08703
ENSDARG00000023712	mao	Turquoise (M1)	10.8378	10.9641	11.0736	10.994	10.9923	10.8232	10.4701	10.5108	10.5302	10.3328	10.8212	10.7024	10.7942	10.7981	11.1593	10.9716	11.136	11.0527
ENSDARG00000023852	lsm4	Turquoise (M1)	8.54639	8.86767	8.83685	8.66481	8.76218	9.69355	10.0368	9.41144	9.51579	10.2932	8.75983	8.78044	8.82027	8.58246	8.48214	8.54891	8.37304	8.13308
ENSDARG00000023858	ccdc174	Turquoise (M1)	7.86278	7.92538	7.86182	8.12865	7.97146	8.5244	8.7359	8.31947	8.46598	8.8391	8.00317	8.00325	7.85574	8.08068	8.19026	7.89259	7.89083	8.0669
ENSDARG00000023903	atf2	Turquoise (M1)	8.76732	9.15079	9.06732	8.87457	8.9185	7.2776	7.59312	7.74662	7.88608	7.01477	8.67547	8.89936	8.94001	9.32005	9.34276	9.2555	9.26793	9.34553
ENSDARG00000023914	mark4a	Turquoise (M1)	11.4579	11.6039	11.7545	11.5962	11.5961	8.79195	8.94156	9.35718	9.64006	8.64966	10.9516	11.1326	11.3637	11.4425	11.3745	11.449	11.4216	11.3894
ENSDARG00000023916	phactr1	Turquoise (M1)	9.75116	10.0538	10.1657	10.0113	10.0084	9.03766	9.56972	9.77092	9.52871	9.02272	9.50564	9.72384	9.96613	9.81632	9.87772	10.0556	9.84793	10.0665
ENSDARG00000023933	skila	Turquoise (M1)	9.822	10.0988	10.4086	10.0574	10.0748	8.11169	8.08768	8.76206	8.83381	7.88957	10.317	9.94333	10.2492	10.1496	10.1086	10.1913	10.008	10.0087
ENSDARG00000023940	si:ch73-362m14.4	Turquoise (M1)	10.9026	11.1682	11.3107	11.135	11.1772	9.43821	9.5064	9.82225	10.0516	9.02541	10.6986	10.8552	11.1043	11.1724	11.0677	10.9921	11.1149	11.0214
ENSDARG00000023958	rnf181	Turquoise (M1)	7.65123	7.22439	7.24634	7.32722	7.37297	8.71238	8.78347	8.36101	8.60864	9.05205	7.81245	7.77808	7.34606	7.24533	7.37228	7.30877	7.47368	7.29261
ENSDARG00000023963	tpm4a	Turquoise (M1)	7.82123	7.52088	7.67124	7.61206	7.67571	11.0251	11.0294	9.60667	10.2226	11.1413	9.94149	8.2435	8.1873	8.12656	7.96119	8.11102	7.59385	7.74348
ENSDARG00000024026	sdf2	Turquoise (M1)	7.86278	7.79373	7.59443	7.77177	7.78374	8.66439	8.79677	8.30677	8.4388	8.60714	8.05193	7.74943	7.64511	7.64136	7.57783	7.55987	7.58615	7.72795
ENSDARG00000024092	lmbr1	Turquoise (M1)	9.22605	9.20336	9.09023	9.42735	9.18789	7.60619	8.02669	7.90151	8.06982	7.31175	8.70313	8.89676	8.88138	8.86639	9.09341	9.0721	9.19444	9.14217
ENSDARG00000024112	gmppaa	Turquoise (M1)	8.75419	8.6499	8.71433	8.63901	8.70476	9.09908	9.21606	8.87231	9.03104	9.26053	8.80022	8.52855	8.53839	8.7182	8.6452	8.68703	8.51286	8.60896
ENSDARG00000024124	sde2	Turquoise (M1)	9.34458	9.06814	9.40232	8.92166	9.22374	8.52081	8.3678	8.64601	8.54819	7.97033	8.87234	9.15099	8.90217	9.1286	9.26238	9.00227	9.32184	8.9919
ENSDARG00000024167	kcnh1a	Turquoise (M1)	9.75775	10.0043	10.0563	10.156	9.94212	8.23533	8.96826	8.6189	9.38181	8.59268	9.50215	9.23968	9.57155	9.79131	9.54315	9.56221	9.5802	9.21873
ENSDARG00000024184	narf	Turquoise (M1)	8.94729	8.7594	8.75315	8.8523	8.84601	9.14872	9.20613	9.05269	9.33424	9.25825	8.75102	8.89676	8.90217	8.688	8.74587	8.64378	8.78093	8.83853
ENSDARG00000024219	zgc:55582	Turquoise (M1)	10.2377	10.1113	10.1281	10.2526	10.1583	9.47572	9.9157	9.92389	9.74658	8.99553	9.82902	10.2703	10.0628	10.2401	10.1427	10.1865	10.2783	10.1629
ENSDARG00000024277	pigm	Turquoise (M1)	5.8893	6.08618	6.36445	5.88418	6.0678	6.50275	6.87813	6.75712	6.7159	6.88777	6.52305	6.30131	6.17709	6.39623	6.21228	6.22008	6.05869	6.20117
ENSDARG00000024295	slc11a2	Turquoise (M1)	8.06839	8.194	8.19917	7.97174	8.13734	8.92548	9.29079	8.66602	8.76988	8.69434	8.69397	8.17642	8.14796	8.34482	8.12008	7.79492	7.93985	7.97142
ENSDARG00000024314	herpud1	Turquoise (M1)	9.36774	9.51544	9.26816	9.24295	9.3687	10.3915	10.2194	10.1404	9.81597	10.3671	9.73553	9.62387	9.33448	9.45557	9.33155	9.19828	9.20944	9.28879
ENSDARG00000024416	twistnb	Turquoise (M1)	7.34473	7.55392	7.22785	7.52964	7.44081	8.15873	8.92348	8.19171	8.15352	8.62145	7.34709	7.30433	7.53449	7.8868	7.23283	7.31385	7.654	7.55369
ENSDARG00000024465	mrps18a	Turquoise (M1)	8.82287	8.42454	8.44851	8.29783	8.52172	9.35207	9.10819	9.0703	8.99157	9.66588	8.80022	8.35382	8.67246	8.79578	8.36029	8.46551	8.51286	8.23518
ENSDARG00000024478	mpc2	Turquoise (M1)	9.4323	9.40309	9.3186	9.56368	9.45473	9.77403	9.69923	9.6015	9.83393	9.86966	9.35899	9.52654	9.48371	9.38418	9.64401	9.51614	9.24142	9.48749
ENSDARG00000024588	gpc5b	Turquoise (M1)	9.06534	8.6499	9.02567	8.59943	8.85308	6.39249	6.23537	6.85556	6.48458	5.96971	8.00317	8.67221	8.75318	8.30552	8.73739	9.05571	9.04911	9.29142
ENSDARG00000024619	foxo6b	Turquoise (M1)	10.1768	10.5388	10.4893	10.5564	10.4348	8.97089	9.221	9.48075	9.63324	8.77655	10.0578	10.1836	10.178	10.4242	10.542	10.4961	10.5807	10.5679
ENSDARG00000024651	snrpa1	Turquoise (M1)	8.81446	8.93764	8.69783	9.27398	8.97786	9.65483	10.3703	9.97415	9.47822	10.0653	9.09268	9.43474	9.00734	8.90774	9.17411	8.62974	8.82383	9.20764
ENSDARG00000024693	lysmd3	Turquoise (M1)	8.34487	8.2946	8.54392	8.27005	8.38204	8.59097	8.61712	8.41721	8.79151	8.88725	8.30998	8.43491	8.51927	8.30552	8.22713	8.24094	8.07755	8.21866
ENSDARG00000024728	hdhd2	Turquoise (M1)	7.57309	7.36184	7.30919	7.3701	7.40244	8.06304	8.50802	7.83211	7.93707	8.32162	7.2744	7.46875	7.47176	7.37877	7.61558	7.43989	7.38749	7.57993
ENSDARG00000024827	rnf150a	Turquoise (M1)	8.54129	8.54776	8.75315	8.7068	8.63267	7.25154	7.47296	7.60791	7.69505	6.98127	8.05671	8.25979	8.3989	8.49207	8.46168	8.25671	8.36411	8.2889
ENSDARG00000024940	rnf144b	Turquoise (M1)	7.919	7.52921	7.74412	8.21865	7.86322	8.60799	8.49174	8.38133	8.14873	8.69434	8.43633	8.03203	7.77389	7.91034	7.9091	7.6978	7.80739	7.4997
ENSDARG00000024967	fancg	Turquoise (M1)	6.0536	6.0619	6.04865	6.48578	6.16812	7.05416	7.17628	6.91368	6.56123	7.02576	6.64603	6.59638	6.19766	6.28771	6.10405	5.83884	6.03468	6.1772
ENSDARG00000025011	synj1	Turquoise (M1)	13.6614	13.6899	13.7704	13.6978	13.7208	12.8533	13.0521	13.0999	13.2747	12.6877	13.2303	13.4018	13.6852	13.5331	13.6266	13.5152	13.6608	13.5141
ENSDARG00000025012	tpi1a	Turquoise (M1)	9.06888	8.72021	8.42864	9.08967	8.84247	9.48679	9.69391	8.95588	9.57393	9.61143	8.80022	8.29577	8.85725	8.72483	8.82001	8.30046	8.34154	8.60896
ENSDARG00000025032	nr3c1	Turquoise (M1)	11.7585	11.7404	11.7934	11.6948	11.7599	10.9182	11.0866	11.3327	11.2165	10.7639	11.3253	11.4946	11.6251	11.6652	11.6388	11.745	11.8764	11.6933
ENSDARG00000025033	stx5a	Turquoise (M1)	9.81149	9.79255	9.96564	9.98425	9.90016	10.3787	10.4312	10.0932	10.3775	10.7164	9.65139	9.68077	9.90129	9.91221	9.84656	9.66495	9.6983	9.6942
ENSDARG00000025071	brd8	Turquoise (M1)	9.96924	10.0466	10.0328	10.059	10.0535	9.81411	9.74623	10.0097	10.0541	9.69657	9.92074	10.0263	9.99127	10.0983	10.0687	10.0269	10.1726	10.1514
ENSDARG00000025108	magixa	Turquoise (M1)	11.0268	11.3103	11.3407	11.3293	11.2221	9.73744	9.66883	10.1675	10.3361	9.4018	10.5502	10.7009	10.926	11.0916	11.1593	11.1957	11.2204	11.1736
ENSDARG00000025187	six6a	Turquoise (M1)	4.83168	4.85417	4.73353	4.80149	4.78307	5.74238	5.52863	5.47164	6.45265	7.4955	5.32449	4.70437	4.74046	4.7379	4.16044	4.98981	5.05742	4.16044
ENSDARG00000025189	cpne8	Turquoise (M1)	8.39655	8.75235	8.59114	8.58148	8.54809	6.56189	6.12756	6.7183	7.14602	6.36312	7.85159	7.1714	8.08162	8.26511	8.31537	8.67536	8.21314	8.39067
ENSDARG00000025206	syt2a	Turquoise (M1)	11.1038	11.215	11.2645	11.3233	11.1588	7.4011	7.12369	7.80216	8.03387	7.33826	9.81924	10.0569	10.6438	10.6	10.572	10.6086	10.788	10.5526
ENSDARG00000025226	znf668	Turquoise (M1)	8.08951	8.20955	8.25895	8.18333	8.1942	7.79133	7.36889	7.74662	7.74686	7.52648	7.932	7.95898	8.06586	7.94493	7.89386	8.03373	8.02178	7.81136
ENSDARG00000025233	lipt1	Turquoise (M1)	6.47005	6.2442	6.39902	6.50569	6.42923	6.73792	6.75787	6.37652	6.81827	7.2004	6.5653	6.28467	6.33313	6.28771	6.26314	6.54027	6.46311	6.33631
ENSDARG00000025299	tspan9a	Turquoise (M1)	7.838	7.95031	8.21783	8.09735	7.99728	6.40881	6.70082	6.32469	7.02405	6.43262	7.92678	7.59682	7.76087	7.7758	8.12661	8.12541	8.12595	8.09132
ENSDARG00000025319	fynb	Turquoise (M1)	9.61027	9.8431	9.95598	9.52201	9.73811	7.87841	7.98648	8.28534	8.86036	8.32162	9.26119	9.3557	9.42134	9.77865	9.52111	9.64518	9.86697	9.39524
ENSDARG00000025325	ccsapa	Turquoise (M1)	9.74012	9.79083	9.795	9.90903	9.86395	7.91181	7.93909	8.20089	8.24612	7.36429	8.9018	9.70617	9.65958	9.70525	9.92322	9.60685	9.94966	9.61881
ENSDARG00000025326	myl12.2	Turquoise (M1)	9.52016	9.5258	9.66209	9.52201	9.58971	10.0324	9.69036	9.81928	9.76542	10.2639	9.60171	9.40218	9.56784	9.38418	9.46579	9.27751	9.35819	9.33792
ENSDARG00000025340	tusc2b	Turquoise (M1)	8.83123	8.75235	8.8637	8.6985	8.81016	9.33991	9.53246	8.87803	9.26752	9.39765	8.8395	8.68431	8.80773	8.75428	8.6452	8.45645	8.66226	8.6005
ENSDARG00000025346	znf277	Turquoise (M1)	8.18416	8.11912	8.05088	8.0458	8.11395	8.95236	9.47367	8.63928	8.77609	9.17589	8.52859	8.31927	8.1873	8.11143	8.15878	8.08178	8.11533	8.25151
ENSDARG00000025391	pfdn2	Turquoise (M1)	8.52075	8.47681	8.64375	8.66481	8.61615	9.21235	9.58704	8.7927	9.18595	9.09623	9.00658	8.68431	8.60154	8.77358	8.78342	8.5847	8.57604	8.74185
ENSDARG00000025403	ftr83	Turquoise (M1)	5.56721	5.38599	5.55702	6.09086	5.63272	8.1354	8.94455	7.22811	7.96462	8.21225	5.86717	6.04608	5.92539	6.10569	5.49117	5.79164	5.70197	5.52
ENSDARG00000025404	ube2g2	Turquoise (M1)	8.33313	8.52312	8.55129	8.4882	8.50386	9.27966	9.22592	9.10243	8.85156	9.39973	8.5113	8.35382	8.57588	8.59337	8.38768	8.41492	8.29532	8.15061
ENSDARG00000025421	tdrd3	Turquoise (M1)	9.88352	9.8823	9.74137	10.1815	9.93549	9.39969	9.24787	9.63059	9.85019	9.22118	9.96196	9.95335	9.97456	10.1836	10.0568	9.87049	10.0994	9.9926
ENSDARG00000025428	socs3a	Turquoise (M1)	8.74093	9.0738	9.00973	8.2011	8.75843	10.9938	11.6235	10.0304	10.578	11.1762	10.6678	9.15099	9.84111	9.37369	9.32308	8.70435	8.79427	7.57993
ENSDARG00000025436	msrb1a	Turquoise (M1)	6.75062	7.12835	7.16116	6.5253	6.8493	8.95236	8.88039	7.5147	8.24163	8.73439	7.23233	7.00499	7.11817	6.84865	6.7909	7.16978	7.21767	6.73921
ENSDARG00000025468	bnip3la	Turquoise (M1)	10.0394	10.2096	10.3059	10.1874	10.2018	8.02797	8.04358	8.50873	8.48128	7.64406	9.76931	10.1952	10.2057	10.3745	10.2207	10.1693	10.2912	10.1266
ENSDARG00000025518	zgc:101679	Turquoise (M1)	9.18426	9.28612	9.36733	9.21415	9.28505	9.76497	9.43168	9.70166	9.73548	10.1077	9.17831	9.0092	9.08471	8.90774	9.15833	8.86015	9.10367	9.15088
ENSDARG00000025522	sgk1	Turquoise (M1)	10.9272	10.6762	10.6024	10.6442	10.7245	11.3813	11.4862	11.2174	11.4385	11.1756	11.2893	10.641	10.6081	10.6373	10.7435	10.5071	10.8021	10.3421
ENSDARG00000025554	wdr83os	Turquoise (M1)	8.19718	8.04011	7.94833	8.00588	8.07206	9.26044	9.44229	9.0678	9.15294	9.87115	8.69397	8.1807	8.06586	8.14648	8.09369	7.98717	8.03874	7.99751
ENSDARG00000025555	ormdl3	Turquoise (M1)	8.776	8.59581	8.41659	8.9464	8.66516	6.79999	6.49685	6.80722	7.10654	6.32694	7.78959	7.90292	8.07113	8.34051	7.96119	8.11391	7.75351	7.93136
ENSDARG00000025566	slc25a3b	Turquoise (M1)	11.7298	11.9323	12.1511	11.877	11.9553	12.7378	12.8077	12.7163	12.8832	13.0239	12.5374	12.1865	12.0414	12.1545	11.9626	11.7812	11.7701	11.7902
ENSDARG00000025607	ifnphi1	Turquoise (M1)	4.83168	4.76265	4.73353	4.89868	4.78307	5.49549	5.66905	5.5415	5.18491	6.17123	5.15154	5.31165	4.82872	5.03497	4.16044	5.02565	4.75298	4.78628
ENSDARG00000025699	mbd1b	Turquoise (M1)	9.83244	9.73481	9.66548	9.79315	9.77573	9.9509	10.4989	10.0317	9.98216	10.3054	9.68564	9.8445	9.68206	9.81321	9.74673	9.68446	9.7124	9.75827
ENSDARG00000025757	tspan35	Turquoise (M1)	4.93326	4.93424	5.14064	4.80149	4.96023	7.03382	7.76643	6.7443	8.22807	8.09896	6.00289	4.85994	5.25234	4.90271	5.08118	4.91247	5.17307	5.10688
ENSDARG00000025789	chd4b	Turquoise (M1)	12.3931	12.3223	12.3739	12.2208	12.3552	11.3901	11.2495	11.7729	11.6928	11.0077	12.2977	12.5585	12.3417	12.4558	12.3805	12.5206	12.5357	12.528
ENSDARG00000025808	taf5l	Turquoise (M1)	7.88715	8.0343	8.10705	7.72324	7.95837	7.20701	7.25652	7.45414	7.76581	7.03666	8.14021	8.13726	8.16777	8.03863	7.95386	8.05495	7.93381	8.31503
ENSDARG00000025850	rps21	Turquoise (M1)	10.5166	10.3756	10.4025	10.4169	10.4604	12.2562	12.2726	11.7923	11.6567	12.5957	11.5539	11.2479	10.7059	10.6478	10.7082	10.5299	10.5398	10.5733
ENSDARG00000025854	ddx51	Turquoise (M1)	7.18224	7.18252	7.1415	7.27173	7.2266	8.19077	8.78012	7.89585	7.997	7.8955	7.74275	7.61602	7.47975	7.46119	7.50923	7.48552	7.5784	7.46252
ENSDARG00000025875	kctd2	Turquoise (M1)	9.07241	9.23905	9.37771	9.38665	9.25605	7.54345	7.48959	7.74031	7.95366	7.06886	9.04068	8.89676	9.04788	9.02509	9.22044	9.24371	9.22182	9.16241
ENSDARG00000025920	tiam1b	Turquoise (M1)	11.9213	12.067	12.297	11.7846	11.9992	9.73125	10.0057	10.1067	10.2956	9.17104	11.0558	11.7313	11.7316	11.7761	11.8508	11.9961	12.1334	12.0897
ENSDARG00000025972	mcts1	Turquoise (M1)	9.32401	9.15613	9.21126	9.27955	9.26666	10.5083	10.4408	10.2021	10.4017	10.9788	10.0253	9.47356	9.41309	9.52737	9.23556	9.18053	9.27983	9.17954
ENSDARG00000025983	l3mbtl3	Turquoise (M1)	9.2197	9.49028	9.57279	9.52904	9.44308	7.30318	7.49782	7.89585	7.95366	6.98127	8.73026	8.87582	9.30357	9.24142	8.92078	9.51178	9.49096	9.37308
ENSDARG00000026028	ankrd44	Turquoise (M1)	10.4327	10.6404	10.5186	10.5157	10.5336	9.28601	9.51648	9.59283	9.84134	8.86938	10.437	10.4995	10.2745	10.3155	10.399	10.5524	10.3812	10.4912
ENSDARG00000026035	ube2b	Turquoise (M1)	9.80726	9.71142	9.80887	9.74365	9.78129	9.11344	8.95349	9.07778	9.40001	8.57808	9.28982	9.50796	9.60633	9.5555	9.6372	9.54737	9.7036	9.56987
ENSDARG00000026072	pdcd5	Turquoise (M1)	9.1345	8.82466	8.88716	8.94289	8.97463	9.42292	9.79672	9.13147	9.64685	9.79913	8.88849	8.7491	8.97967	8.78631	8.78753	8.61148	9.09292	8.70287
ENSDARG00000026098	si:dkey-13a21.4	Turquoise (M1)	4.5503	4.16044	4.49276	4.80149	4.52177	5.2179	5.52863	4.81301	5.08045	5.29493	4.71069	4.7873	4.82872	4.49531	4.16044	4.59788	4.92193	4.52365
ENSDARG00000026109	slc48a1b	Turquoise (M1)	8.72307	8.78724	8.77218	8.87457	8.81379	9.12293	9.0921	9.30292	9.08455	9.39765	8.75983	8.6477	8.49599	8.43659	8.7543	8.63978	8.6659	8.53539
ENSDARG00000026183	polr2eb	Turquoise (M1)	7.99565	8.00487	8.12695	8.23599	8.11395	9.46457	9.43594	9.22424	9.27849	9.81165	8.45454	8.26383	8.3347	7.93349	8.08701	8.02761	7.95184	7.91091
ENSDARG00000026185	yju2	Turquoise (M1)	8.28517	8.14632	8.35054	8.06535	8.23812	8.5978	8.40307	8.52343	8.48508	8.49499	8.29388	8.18498	8.26749	8.2787	8.17775	8.10231	8.34609	8.13895
ENSDARG00000026322	dhrs13a.1	Turquoise (M1)	8.38523	8.194	8.21783	8.31424	8.31701	9.11344	9.46745	9.02716	9.02844	9.52855	8.63136	8.45978	8.71338	8.53043	8.44614	8.3181	8.19813	8.45784
ENSDARG00000026387	pip4p1b	Turquoise (M1)	8.29731	8.20955	8.08688	8.28678	8.23812	7.19793	7.21698	7.24616	7.34527	6.62167	7.9372	8.0879	7.88	8.02792	8.28072	8.10231	8.42118	7.92458
ENSDARG00000026417	ccr12b.2	Turquoise (M1)	4.5503	4.16044	4.16044	4.98364	4.52177	7.59248	9.3393	7.47716	9.51949	9.19513	5.81831	4.47571	5.34264	5.24767	4.16044	4.66491	4.75298	4.16044
ENSDARG00000026476	tia1l	Turquoise (M1)	10.8797	10.7353	10.8279	10.7849	10.8337	11.3156	11.3898	10.9205	11.2964	11.4647	11.2283	10.8711	10.9056	10.7656	10.7593	10.6572	10.7788	10.7977
ENSDARG00000026499	ppm1e	Turquoise (M1)	11.6196	11.7346	11.9416	11.1365	11.6217	8.8786	9.17846	9.43492	9.9995	8.72448	11.4491	11.3735	11.7461	11.5984	11.4924	11.5877	11.4016	11.3646
ENSDARG00000026548	cyp2u1	Turquoise (M1)	8.38523	8.42454	8.95808	8.50259	8.58253	7.32831	7.09116	7.76538	7.51979	6.89981	8.08509	8.61646	8.37782	8.53043	8.69423	8.55741	8.83356	8.54424
ENSDARG00000026629	gmds	Turquoise (M1)	8.89642	8.94693	9.09023	9.0248	9.00664	9.64663	10.4397	9.50499	9.58987	9.72332	8.88581	8.73463	8.92847	8.91934	8.95773	8.87722	8.88744	8.72638
ENSDARG00000026654	gosr1	Turquoise (M1)	8.43	8.38404	8.57316	8.50259	8.49485	8.93899	9.04829	8.60515	8.82185	9.10643	8.50433	8.51844	8.47233	8.58974	8.41986	8.40081	8.48019	8.34069
ENSDARG00000026712	rab5c	Turquoise (M1)	11.2044	11.2175	11.321	11.1427	11.2458	11.7019	11.8531	11.2066	11.4979	11.8833	11.5522	11.2525	11.2275	11.2599	10.9772	11.162	11.1574	11.0749
ENSDARG00000026766	bcl2l10	Turquoise (M1)	9.59073	9.51544	9.40028	9.84476	9.60233	10.2836	10.5818	10.2225	10.0035	10.8528	9.32186	9.32515	9.27882	9.48316	9.86999	9.62311	9.03514	9.78088
ENSDARG00000026811	extl3	Turquoise (M1)	10.8977	10.9649	11.1082	11.0175	10.9955	9.24965	9.03713	9.42127	9.81597	8.98174	10.4899	10.6541	10.7605	10.768	10.9306	10.8727	10.9085	10.9862
ENSDARG00000026839	med21	Turquoise (M1)	6.9678	7.03705	7.12157	6.89749	7.03816	7.84422	7.67519	7.39087	7.55662	8.01451	7.15326	7.04372	7.22723	7.27305	7.09156	6.9512	7.14565	6.69087
ENSDARG00000026871	uchl1	Turquoise (M1)	11.9877	11.9261	11.8947	11.8898	11.9573	12.2397	12.5626	12.2565	12.2695	12.7703	12.1336	11.7866	12.0685	12.0335	11.9725	11.7556	11.9332	11.8569
ENSDARG00000026875	fam57ba	Turquoise (M1)	9.80515	9.77703	9.90812	9.92332	9.86918	8.99694	9.31641	9.51052	9.51764	8.85129	9.44149	9.67472	9.55853	9.70525	9.80665	9.80607	9.7876	9.75827
ENSDARG00000026907	slc48a1a	Turquoise (M1)	9.78379	9.81129	9.77786	10.0847	9.86744	8.02797	8.25645	8.38939	8.52623	7.61556	9.20432	9.54323	9.91304	9.60656	9.74673	9.56536	9.5802	9.43142
ENSDARG00000026908	tmed2	Turquoise (M1)	10.2626	10.2121	10.2128	10.1285	10.2332	11.215	11.4898	10.9862	11.4193	11.683	10.9851	10.5123	10.3681	10.2732	10.19	10.0269	10.053	9.99744
ENSDARG00000026972	si:ch211-119o8.6	Turquoise (M1)	6.19873	5.42952	5.77337	5.67335	5.70566	7.02354	6.8392	6.67834	5.92059	7.57912	5.93693	5.42232	5.92539	5.89278	5.92187	5.26691	5.27513	4.78628
ENSDARG00000026986	rexo1	Turquoise (M1)	9.18752	9.35744	9.24794	9.31794	9.29545	8.78598	8.86468	9.08769	9.22277	8.86938	9.03586	9.24377	9.18018	9.44759	9.18349	9.19828	9.28927	9.30189
ENSDARG00000026988	tbc1d22b	Turquoise (M1)	9.93866	9.91417	9.85415	9.89459	9.83038	7.55056	7.78668	8.01539	8.19128	7.5188	9.60008	9.8364	9.7143	9.7976	9.84262	9.79086	10.008	9.90955
ENSDARG00000027016	gbf1	Turquoise (M1)	11.8476	11.9319	12.0015	11.8816	11.9175	11.0668	11.7544	11.2651	11.6197	11.2418	11.7185	11.8818	11.7534	11.8558	11.8871	11.7857	11.9611	11.8945
ENSDARG00000027065	slc38a3a	Turquoise (M1)	13.331	12.9981	13.1815	13.2206	13.1846	12.0368	12.5943	12.6494	12.7842	12.2286	12.8051	12.8489	12.9158	12.8568	13.2101	13.0547	13.004	12.8884
ENSDARG00000027079	znf804a	Turquoise (M1)	11.3945	11.4103	11.6429	11.2592	11.4078	9.46644	9.30715	9.85742	10.2192	9.29215	10.4846	10.8869	11.1785	11.4152	11.4823	11.4592	11.5928	11.5743
ENSDARG00000027129	tmem218	Turquoise (M1)	7.04302	7.09481	6.78206	6.74078	6.91975	5.84823	5.79384	6.11467	6.16464	5.60232	6.44952	6.81585	6.67186	7.05575	7.05041	6.9901	6.85294	6.97164
ENSDARG00000027140	nup160	Turquoise (M1)	9.74012	9.97588	10.1941	10.0378	10.01	9.44768	9.46537	9.80884	9.85166	9.0911	10.1948	10.065	10.0051	9.96347	10.0551	10.0352	10.17	10.3113
ENSDARG00000027154	tpd52l2a	Turquoise (M1)	9.50458	9.4754	9.26369	9.41222	9.4337	10.1975	10.4897	10.0201	9.69512	10.3954	9.04309	9.55972	9.249	9.34604	9.34276	9.37919	9.64414	9.35309
ENSDARG00000027159	fbxo28	Turquoise (M1)	8.55146	8.79068	9.1078	8.41911	8.76967	7.49266	7.47296	7.81422	8.03906	7.00369	9.02617	8.88371	8.91684	8.81454	8.86351	9.01466	8.90291	9.01435
ENSDARG00000027182	rnf25	Turquoise (M1)	8.46269	8.45526	8.35054	8.34119	8.42539	8.90361	8.98869	8.74962	8.78536	9.26053	8.65043	8.65694	8.52312	8.58974	8.36029	8.58054	8.4552	8.36089
ENSDARG00000027290	nrp1b	Turquoise (M1)	10.0376	10.2438	10.2186	10.254	10.1583	8.70923	8.97412	9.27066	9.43573	8.46354	10.212	9.83776	10.0903	10.0008	10.1775	10.0757	10.143	9.87845
ENSDARG00000027353	zmym2	Turquoise (M1)	10.6873	10.7775	10.849	10.8387	10.7994	10.3396	10.2487	10.4265	10.7423	10.2235	10.6299	10.9325	10.7376	10.9349	10.8592	10.9199	10.9845	11.0055
ENSDARG00000027357	cd2bp2	Turquoise (M1)	8.62547	8.62311	8.60889	8.6985	8.70085	9.2366	9.03432	8.97471	9.01538	9.3935	8.41417	8.45978	8.40725	8.74127	8.56598	8.46551	8.61792	8.21311
ENSDARG00000027423	igf1ra	Turquoise (M1)	11.2425	11.2952	11.2656	11.1818	11.2022	9.53556	9.87399	9.9472	10.1893	9.26509	10.9414	10.881	11.0036	10.9582	11.2625	11.2575	11.3239	11.155
ENSDARG00000027428	rpp30	Turquoise (M1)	7.04302	6.91379	6.64729	6.86755	6.87791	7.8671	8.03797	7.30756	7.39505	7.95907	6.92815	6.80454	6.78138	6.64849	6.68619	6.86995	6.85294	7.1354
ENSDARG00000027497	mast1a	Turquoise (M1)	11.8222	12.0546	12.0379	12.1504	11.9695	9.56719	9.80661	10.0149	10.2146	9.15638	11.515	11.3165	11.5504	11.8138	11.6433	11.7848	11.805	11.7767
ENSDARG00000027552	mapk1	Turquoise (M1)	12.8494	12.8141	13.0496	12.9523	12.9293	10.3638	10.4794	10.7154	10.967	9.89781	12.1386	12.4386	12.5776	12.7737	12.8322	12.7827	12.8275	12.7934
ENSDARG00000027564	pak6a	Turquoise (M1)	9.8633	10.2749	10.3317	10.0163	10.0778	7.57865	8.0658	8.18709	8.26394	7.25718	9.1805	9.40218	9.81004	9.81321	9.84656	10.0794	9.96152	10.0939
ENSDARG00000027595	selenot1b	Turquoise (M1)	8.38523	8.14632	8.1755	8.2011	8.2489	9.05265	8.88351	8.85209	8.68988	9.27191	8.60554	8.45625	8.30819	8.24216	8.22713	8.03983	8.10464	8.20754
ENSDARG00000027602	lrfn1	Turquoise (M1)	9.96924	10.3606	10.4237	10.059	10.2059	8.34508	8.5791	9.08769	9.18595	8.09383	9.51779	9.88825	10.1273	10.1569	10.0363	10.4806	10.351	10.2852
ENSDARG00000027612	gatad1	Turquoise (M1)	9.30314	9.28124	8.99632	9.01147	9.15685	8.80381	8.52413	8.87803	8.98622	8.25425	8.92547	8.94531	9.00185	9.01161	9.0666	9.15976	9.01819	9.10679
ENSDARG00000027638	adra1ab	Turquoise (M1)	7.072	6.74967	6.84476	6.89749	6.91975	6.07807	5.90659	6.42639	6.35194	5.96971	6.78258	7.48976	7.17871	7.03421	7.36117	7.32396	7.36057	7.43399
ENSDARG00000027639	zgc:165539	Turquoise (M1)	4.5503	4.93424	4.16044	5.05986	4.67012	5.2628	5.32189	5.27263	5.64564	6.43262	4.9944	4.70437	4.74046	4.7379	4.81693	4.59788	4.92193	4.78628
ENSDARG00000027676	si:ch211-133l5.8	Turquoise (M1)	6.75062	6.88776	6.84476	6.86755	6.8493	6.17879	6.08174	6.39335	6.61954	6.46605	6.95967	6.69832	6.76816	7.02331	6.91911	7.02171	6.70144	6.99813
ENSDARG00000027724	dgkb	Turquoise (M1)	9.34458	9.46683	9.0124	9.08649	9.22374	7.25154	8.16172	7.54404	7.8745	7.65809	8.55919	8.4738	9.07166	9.26205	9.44253	9.29157	9.5432	9.63545
ENSDARG00000027749	hirip3	Turquoise (M1)	8.50515	8.47253	8.39218	8.8448	8.61615	9.42292	9.61357	9.25535	9.23183	10.0534	8.28576	8.38012	8.4763	8.6006	8.61311	8.48348	8.70174	8.27832
ENSDARG00000027777	tnfaip3	Turquoise (M1)	9.13787	9.37816	9.50813	9.37888	9.34886	7.9173	8.09849	8.44837	8.872	7.93052	9.29588	9.45251	9.31025	9.32005	9.07335	9.35016	9.13019	9.34553
ENSDARG00000027899	sem1	Turquoise (M1)	9.19725	9.17468	9.18549	9.28509	9.26666	10.2482	10.1277	9.82965	10.0021	10.6431	9.31391	9.18329	9.15813	9.204	9.15515	9.13586	8.96613	8.87756
ENSDARG00000027903	adamtsl3	Turquoise (M1)	11.534	11.4352	11.7501	11.5917	11.5508	9.06747	8.95941	8.88089	9.34053	8.28608	10.7265	10.7903	11.0627	11.0553	11.3146	11.5007	11.4597	11.2552
ENSDARG00000027916	fntb	Turquoise (M1)	8.81446	8.90626	8.75634	9.1334	8.9185	9.63009	9.94136	9.2016	9.58457	9.85914	9.00164	8.82756	8.74003	8.71154	8.66322	8.54035	8.83356	8.62991
ENSDARG00000027938	rad18	Turquoise (M1)	8.04696	7.98691	8.16592	8.22445	8.1021	8.50271	8.35434	8.45988	8.58406	8.78293	8.02776	8.01291	7.81225	8.21883	7.88618	8.00909	8.11	8.21311
ENSDARG00000027963	camkva	Turquoise (M1)	12.7267	12.5296	12.8055	12.3314	12.6486	10.6987	10.756	11.2824	11.3247	10.0282	11.143	12.1097	12.5529	12.337	12.4666	12.4141	12.5964	12.1866
ENSDARG00000027966	ap1s3b	Turquoise (M1)	6.14266	5.84829	6.02604	6.48578	6.11896	8.28279	9.39062	7.91835	8.07488	8.44353	6.86287	6.12438	5.99925	6.22986	6.10405	5.92798	5.49085	5.90845
ENSDARG00000028017	tp53inp1	Turquoise (M1)	7.53234	7.92538	8.07669	8.28678	7.97796	7.26897	7.08014	7.4998	7.52723	6.51466	8.15367	8.30365	7.5268	7.95062	7.99727	8.00286	8.09387	7.72795
ENSDARG00000028027	trim63a	Turquoise (M1)	6.02245	4.76265	5.23972	5.67335	5.27791	8.34101	6.35387	6.45861	8.34569	8.35201	4.93403	4.92525	4.49681	5.66549	5.15227	5.31825	4.75298	4.78628
ENSDARG00000028048	rdh8a	Turquoise (M1)	9.04033	7.81427	9.34846	8.99463	8.80653	6.93841	7.01216	7.4998	7.72765	7.87765	8.15367	8.53525	7.89198	9.44157	9.24156	8.89241	9.13019	8.11533
ENSDARG00000028082	mapkapk5	Turquoise (M1)	8.95878	8.95921	9.00438	9.15477	9.02552	9.22562	9.41669	9.04254	9.19756	9.55299	9.06455	9.10226	8.95145	9.05693	8.95773	8.99759	9.06294	9.19085
ENSDARG00000028099	sh2d3ca	Turquoise (M1)	10.2123	10.5337	10.7253	10.3914	10.4742	8.83014	9.04829	9.4751	9.5524	8.54841	10.018	10.3406	10.3193	10.5252	10.3289	10.5093	10.4741	10.5093
ENSDARG00000028119	sumo3a	Turquoise (M1)	11.613	11.5527	11.5469	11.5737	11.5904	11.9694	12.2103	11.8392	12.2057	12.2849	11.5194	11.5053	11.4203	11.5325	11.4823	11.4509	11.456	11.3991
ENSDARG00000028164	cst14a.1	Turquoise (M1)	5.8893	5.51141	5.71567	5.88418	5.7742	6.65951	6.62598	6.3422	6.31658	6.74786	6.20052	6.08584	5.92539	5.89278	5.53796	5.79164	5.90707	5.63982
ENSDARG00000028173	slc4a2a	Turquoise (M1)	7.62243	7.69375	8.4406	7.73145	7.8491	9.83879	9.77338	8.95046	9.69676	9.77696	9.26943	7.97389	7.78679	7.6343	7.60624	8.10522	7.25722	7.18214
ENSDARG00000028201	commd8	Turquoise (M1)	8.03248	7.8278	7.76336	8.17735	7.97796	9.00723	8.58295	8.70843	8.5114	9.05732	8.37263	8.11951	8.00104	8.12153	8.37131	7.95848	7.85931	8.07305
ENSDARG00000028222	itgb8	Turquoise (M1)	8.74978	8.87741	9.09527	8.92878	8.91513	7.18879	7.45614	7.82021	7.70818	6.93531	9.12255	8.76912	9.29012	8.79263	8.90951	9.17502	9.05743	9.19085
ENSDARG00000028257	cyb561a3b	Turquoise (M1)	4.83168	4.76265	4.49276	4.53257	4.67012	5.06755	5.49048	5.12934	5.08045	5.53356	4.4794	4.16044	4.74046	4.16044	4.16044	4.16044	4.16044	4.16044
ENSDARG00000028348	pax3b	Turquoise (M1)	5.36201	5.24239	5.02847	4.89868	5.16471	4.61956	4.7528	4.4888	4.62625	4.49568	5.10246	4.85994	4.74046	4.82578	4.91637	4.98981	4.99273	5.2284
ENSDARG00000028379	trub2	Turquoise (M1)	8.07547	8.18878	8.04042	8.07181	8.11983	8.61474	8.85199	8.55953	8.42303	9.08079	8.02776	8.07874	7.97876	8.29664	8.33801	8.03678	8.28589	8.24609
ENSDARG00000028389	rab44	Turquoise (M1)	7.22145	6.73507	6.51335	7.84914	7.03816	9.7297	9.91112	10.033	9.65865	9.39765	8.60554	7.63497	8.64451	8.66406	7.58736	7.14712	7.00115	7.31369
ENSDARG00000028393	daam2	Turquoise (M1)	10.4958	10.4449	10.7374	10.3965	10.4776	8.79789	8.05473	8.88374	8.27716	8.16898	9.86478	9.96948	10.6252	10.3078	10.3261	10.6889	10.872	10.6784
ENSDARG00000028442	cplane2	Turquoise (M1)	7.072	7.31428	7.18054	7.32722	7.2266	8.36926	8.38113	8.19171	7.80297	8.36909	7.05013	7.23111	7.45563	7.33568	7.53904	7.31891	7.36057	7.75119
ENSDARG00000028475	lin9	Turquoise (M1)	8.29731	8.28485	8.41659	8.39874	8.35737	8.5978	8.8488	8.57372	8.59465	8.88725	8.38408	8.60058	8.42379	8.25138	8.41986	8.35518	8.31862	8.65464
ENSDARG00000028523	inip	Turquoise (M1)	6.9678	6.93933	6.78206	6.75728	6.87791	7.7488	7.58542	7.33307	7.67513	8.07831	7.18012	6.97521	6.95421	7.15873	7.02229	6.91793	6.77239	7.08703
ENSDARG00000028533	macf1a	Turquoise (M1)	14.636	14.7561	14.8961	14.6759	14.7366	14.2464	14.3589	14.6154	14.5896	13.9628	14.6752	14.68	14.6537	14.6482	14.6755	14.7242	14.7161	14.7171
ENSDARG00000028539	morc2	Turquoise (M1)	10.6665	10.7318	10.6698	10.6323	10.6895	10.8907	11.2251	10.9921	10.9208	11.0624	10.6114	10.8444	10.6974	10.6856	10.6665	10.7153	10.7704	10.716
ENSDARG00000028541	si:ch211-121a2.4	Turquoise (M1)	6.9678	7.38962	6.98453	7.68995	7.24847	6.37596	5.90659	6.07246	6.05959	5.72822	6.79434	6.89251	7.04405	7.12862	7.81513	7.54703	7.34233	6.91711
ENSDARG00000028559	march5l	Turquoise (M1)	8.82706	8.7699	8.82779	8.80671	8.83178	9.72192	9.4612	9.39557	9.53969	9.63803	8.93067	9.0283	9.03449	8.91934	8.85178	8.45189	8.52091	8.42465
ENSDARG00000028586	gpr135	Turquoise (M1)	8.56155	8.54776	8.80334	8.4882	8.61615	7.06422	7.04656	7.53676	7.6818	6.95848	7.91628	7.97882	8.23031	8.27419	8.24522	8.46325	8.41254	8.33048
ENSDARG00000028614	mospd1	Turquoise (M1)	8.03248	8.10256	8.24537	8.13483	8.16036	8.56332	8.82951	8.4976	8.57695	8.43139	8.14021	8.38755	8.08162	8.00626	8.08701	8.15658	8.29532	8.20195
ENSDARG00000028628	gdap1l1	Turquoise (M1)	9.8694	10.0891	10.0932	10.1963	10.0642	9.02253	8.94754	9.30292	9.38181	8.76371	9.25498	9.68077	9.88051	9.9151	10.0259	9.78996	9.91197	9.8591
ENSDARG00000028688	exosc2	Turquoise (M1)	6.65696	6.73507	6.86906	7.14132	6.87791	7.52912	7.75277	7.16305	7.24918	7.67199	7.18896	7.16266	7.13864	7.12862	7.17038	7.02794	7.1666	7.07467
ENSDARG00000028786	chst12a	Turquoise (M1)	8.86826	8.93764	8.99632	9.03801	8.94519	7.42455	7.58542	7.68882	7.86283	7.03666	8.82839	8.60058	8.78871	8.67094	8.8557	8.89409	8.84961	8.92913
ENSDARG00000028793	nlk2	Turquoise (M1)	10.8347	11.0318	11.0387	10.9804	10.9762	8.68057	8.74623	9.07778	9.26972	8.25425	10.5902	10.5408	10.8084	10.6504	10.8237	10.9854	11.0352	10.9241
ENSDARG00000028800	CYTH2	Turquoise (M1)	10.0376	10.1705	10.2023	10.1845	10.0928	7.96048	8.00959	8.32787	8.62939	7.7721	9.73998	9.77841	9.98711	10.0184	10.1869	10.2349	10.2289	10.3268
ENSDARG00000028815	zgc:162945	Turquoise (M1)	8.0105	8.04011	7.91435	7.93676	7.99087	7.64652	7.19678	7.80216	7.49722	7.4232	7.61189	7.90811	7.83726	7.95062	7.96119	8.11102	8.21314	8.05453
ENSDARG00000028848	lsm12a	Turquoise (M1)	8.64458	8.67621	8.65405	8.44913	8.62444	9.22121	9.25752	9.1146	9.40802	9.90074	8.93845	8.68732	8.67591	8.43659	8.51229	8.60944	8.65862	8.73414
ENSDARG00000028857	sgsm1a	Turquoise (M1)	11.8817	11.9536	11.9748	12.207	11.9663	10.112	10.4897	10.316	10.7255	9.90659	11.5046	11.6315	11.6242	11.7197	12.1576	11.7251	11.9534	11.8604
ENSDARG00000028889	ndufb10	Turquoise (M1)	8.95878	8.93142	8.96911	9.12104	9.05337	10.0198	9.8278	9.96209	9.49525	10.2386	9.25291	8.96527	8.93425	9.08036	9.00086	8.72147	8.74016	8.87756
ENSDARG00000028894	mrgbp	Turquoise (M1)	8.63506	8.77338	8.65063	8.58148	8.68509	9.37806	9.31871	8.81675	9.25202	9.57702	8.46176	8.60695	8.54218	8.51138	8.55637	8.60944	8.79758	8.52648
ENSDARG00000028896	plpp2b	Turquoise (M1)	7.41383	7.343	7.22785	6.11776	7.03816	5.49549	6.08174	6.27072	5.44122	5.9201	6.43431	7.40379	7.06564	7.61288	7.29262	6.76867	7.27658	6.75495
ENSDARG00000028943	mtss1la	Turquoise (M1)	10.7602	10.4361	10.7966	10.587	10.6495	8.9363	9.63037	9.30716	9.74342	8.66009	10.4112	10.7986	10.618	10.3307	10.7913	10.8225	10.8045	10.6356
ENSDARG00000028971	cpsf2	Turquoise (M1)	8.97395	9.05103	9.0596	9.1426	9.07769	9.54088	9.97682	9.77553	9.60563	9.72828	9.58367	9.24377	9.10278	9.2779	9.19282	9.14997	9.19946	9.40255
ENSDARG00000029003	eif1axa	Turquoise (M1)	6.83826	6.83418	6.80748	6.89749	6.87791	8.3891	8.48353	7.89585	7.84513	8.40265	7.67571	7.30433	7.03314	7.2075	6.77399	6.76867	6.59544	6.73921
ENSDARG00000029063	clpxa	Turquoise (M1)	10.8148	10.4697	10.7857	10.8005	10.7474	10.0058	9.82942	10.0747	10.1006	9.55485	10.3905	10.692	10.6323	10.4672	10.5862	10.7072	10.8004	10.535
ENSDARG00000029064	uqcrq	Turquoise (M1)	9.57341	9.55238	9.45816	9.55452	9.549	10.9195	10.8578	10.5263	10.4722	11.1834	9.84701	9.56299	9.40272	9.49676	9.20516	9.06169	9.15881	8.91214
ENSDARG00000029071	creld2	Turquoise (M1)	7.27206	7.27504	7.55071	7.57602	7.43132	9.48679	9.48808	8.87803	9.11181	9.64154	8.51824	8.16781	7.72108	7.71017	7.47878	7.42591	7.55491	7.48123
ENSDARG00000029088	guf1	Turquoise (M1)	8.44098	8.42454	8.34631	8.43919	8.42539	9.06501	9.26711	8.91749	8.89501	9.16617	8.44364	8.45978	8.37782	8.25138	8.37131	8.20346	8.5448	8.42465
ENSDARG00000029100	chchd1	Turquoise (M1)	8.26058	8.16239	8.13679	8.35182	8.23812	9.49595	9.51447	8.99065	8.95646	9.31652	8.4938	8.21035	8.05526	8.21883	8.12008	8.10522	8.09387	8.15061
ENSDARG00000029107	ube2d1a	Turquoise (M1)	7.6321	7.83452	7.71146	7.92966	7.79115	8.40867	8.89593	8.5452	8.78844	9.18795	7.95783	8.03203	7.4475	8.09614	7.93166	7.6142	7.56279	7.85488
ENSDARG00000029133	tubgcp3	Turquoise (M1)	10.2471	10.2895	10.321	10.3203	10.316	9.93078	9.56972	10.0162	10.142	9.85007	10.0837	10.1294	10.178	10.1557	10.2918	10.2468	10.3076	10.3433
ENSDARG00000029234	stxbp5b	Turquoise (M1)	11.2385	11.3996	11.533	11.2257	11.3055	9.45896	10.0256	9.55226	10.1456	9.10897	10.9252	10.9526	11.2038	11.0248	11.124	11.1728	11.1023	11.0841
ENSDARG00000029248	fubp1	Turquoise (M1)	12.5397	12.4641	12.5396	12.5195	12.5468	12.1722	12.1488	12.4	12.4826	12.1733	12.4553	12.5309	12.6287	12.4831	12.5457	12.5521	12.5833	12.6227
ENSDARG00000029252	ssb	Turquoise (M1)	9.95594	9.89354	9.8332	9.85598	9.91541	10.6495	10.7277	10.4009	10.8201	10.7395	10.4899	9.97809	9.97035	9.74973	9.81874	9.87898	9.89042	9.75827
ENSDARG00000029307	rmc1	Turquoise (M1)	9.0222	8.97442	8.99092	8.97416	9.00347	8.12596	7.89007	8.55238	8.5114	8.11932	8.9666	9.0283	8.84196	8.85436	8.80386	8.86358	9.00679	8.94257
ENSDARG00000029370	ankrd6b	Turquoise (M1)	8.04696	8.01671	8.25895	7.49141	7.97796	6.64599	6.33485	7.219	6.6052	6.34516	8.10832	8.43491	8.06057	8.33618	8.20881	8.41023	7.96374	8.44371
ENSDARG00000029381	aldh3a2b	Turquoise (M1)	9.1345	9.20851	9.23886	9.19659	9.19902	8.23971	7.96889	8.37324	8.48887	7.73951	9.60171	9.54654	9.37113	9.33743	9.2829	9.24503	9.35145	9.31744
ENSDARG00000029445	EIF1B	Turquoise (M1)	10.043	9.90469	9.73976	9.80285	9.90016	10.9147	11.0517	10.7392	10.9417	11.5916	10.1872	9.98666	10.0092	10.0751	9.76142	9.76269	9.66967	9.70212
ENSDARG00000029463	asap1a	Turquoise (M1)	11.8675	12.0242	11.9978	12.0072	11.9881	11.1773	11.4409	11.4078	11.6697	11.1708	11.8881	11.8328	11.7709	12.0471	11.948	11.9272	12.0398	11.9824
ENSDARG00000029480	specc1	Turquoise (M1)	11.2487	11.422	11.4553	11.2746	11.369	10.0685	10.3321	10.3647	10.4374	9.59885	10.7421	10.9688	11.2468	11.103	11.0396	10.9253	11.1183	10.8431
ENSDARG00000029482	ush2a	Turquoise (M1)	8.57157	9.08225	8.49127	8.67331	8.66516	7.06422	7.58542	7.50727	8.02343	6.851	8.4067	7.89772	7.98437	8.76396	8.67659	9.07062	8.49253	8.69891
ENSDARG00000029501	gsk3aa	Turquoise (M1)	9.8694	9.94844	10.0653	9.91441	9.97806	8.78598	9.18099	9.08026	9.52318	8.69772	9.64032	9.64875	9.88946	9.77067	9.89305	9.89162	9.89969	9.83769
ENSDARG00000029615	zgc:77056	Turquoise (M1)	7.99565	7.74462	7.70483	7.7797	7.84198	8.78299	8.9113	8.19171	8.54091	8.82371	7.63134	7.80617	7.72108	7.86287	7.77407	7.98084	7.90941	7.23846
ENSDARG00000029639	tomm70a	Turquoise (M1)	11.2291	11.1722	11.3177	11.2878	11.2749	10.4235	10.444	10.6214	11.0071	10.1939	11.2336	11.098	11.0804	11.0474	11.0559	10.97	11.2143	11.117
ENSDARG00000029660	commd5	Turquoise (M1)	7.14191	7.31428	7.93144	7.21395	7.40244	8.1401	8.28983	8.07161	8.05452	8.75725	7.55869	7.47579	7.22723	7.30918	6.8565	7.07083	7.50673	7.31369
ENSDARG00000029668	crim1	Turquoise (M1)	10.8787	11.0789	11.3317	11.1024	11.0851	9.69514	10.1408	10.1236	10.3255	9.28544	11.0917	10.8042	11.1043	10.9184	11.1305	11.2621	11.2352	11.2074
ENSDARG00000029688	hsp70.1	Turquoise (M1)	5.10153	5.55008	6.19646	6.16991	5.74044	7.05416	8.35884	6.05082	6.45265	7.88957	6.65902	6.21589	4.82872	5.66549	5.66728	5.50037	4.99273	5.60132
ENSDARG00000029724	pqbp1	Turquoise (M1)	6.9678	6.93933	7.03885	7.14132	7.06315	7.41678	7.76643	7.34983	7.37865	7.65809	7.3392	6.97521	7.03314	6.82359	7.1957	7.12409	7.11361	7.36507
ENSDARG00000029761	mpp6b	Turquoise (M1)	7.0283	6.61219	6.86906	7.09071	6.90594	6.17879	5.90659	6.00636	5.8705	5.72822	6.55137	6.55607	6.85812	6.64849	7.36117	7.10656	6.81326	6.78589
ENSDARG00000029766	nr1i2	Turquoise (M1)	9.21332	8.59581	8.90737	9.19365	9.00347	7.4778	7.23689	7.7961	7.7147	7.32948	8.78879	8.6477	9.16306	9.38418	9.07335	8.47003	9.16396	8.69891
ENSDARG00000029768	waplb	Turquoise (M1)	11.5353	11.4859	11.5719	11.5799	11.5404	11.0105	11.1061	11.1947	11.3278	10.6281	11.1952	11.4405	11.3701	11.438	11.6274	11.4364	11.5885	11.4547
ENSDARG00000029907	trim54	Turquoise (M1)	5.8893	5.2927	5.23972	5.41337	5.4257	6.45661	6.65642	6.07246	6.43639	6.66505	5.43626	5.27176	5.20368	5.1992	5.15227	5.31825	5.49085	5.56143
ENSDARG00000029936	grtp1a	Turquoise (M1)	7.0283	7.09481	6.95089	6.35962	6.87791	8.9336	9.47574	7.66236	9.22957	9.39558	8.4067	6.50038	6.15618	6.54393	6.31209	6.70724	6.42787	6.91711
ENSDARG00000030020	agfg1a	Turquoise (M1)	9.50458	9.4818	9.55461	9.54299	9.53371	9.83879	10.2869	9.7097	9.83986	9.91676	9.5704	9.616	9.64381	9.44157	9.62117	9.63218	9.66605	9.52816
ENSDARG00000030064	plekha1a	Turquoise (M1)	9.50458	9.60411	9.44834	9.46938	9.52931	10.6843	10.9661	10.1546	10.7936	10.3639	9.97208	9.59535	9.39646	9.52927	9.39216	9.47975	9.42397	9.40982
ENSDARG00000030078	glipr1b	Turquoise (M1)	10.0249	9.70232	10.1281	10.046	10.0397	11.0588	10.9326	11.2607	11.8236	11.6961	9.8783	9.65337	10.076	9.65761	10.102	9.89078	9.80251	9.68024
ENSDARG00000030106	stmn4	Turquoise (M1)	12.6682	12.6499	12.824	12.8839	12.7945	13.7457	13.4748	13.6235	13.7204	13.4227	12.8622	13.3323	12.7018	13.1277	12.8086	12.4089	12.7646	12.6972
ENSDARG00000030108	sec22ba	Turquoise (M1)	7.57309	7.46114	7.27362	7.9009	7.55878	8.41643	8.64315	8.15908	8.34987	8.64966	7.67571	7.56422	7.62367	7.52383	7.62487	7.34891	7.58615	7.52695
ENSDARG00000030114	vps4a	Turquoise (M1)	9.40738	9.57848	9.55461	9.4046	9.50935	8.62481	8.93856	9.01682	9.06947	8.35201	9.18921	9.21905	9.48568	9.45954	9.36492	9.41233	9.41321	9.45505
ENSDARG00000030153	gnptab	Turquoise (M1)	9.87345	9.93607	9.98341	10.0246	9.96021	10.2899	10.4815	10.4688	10.3611	10.4475	10.2572	10.2141	10.0363	9.97462	10.0551	9.86024	9.90584	10.0788
ENSDARG00000030173	traf2a	Turquoise (M1)	9.58333	9.44298	9.58359	9.71106	9.57911	8.856	8.94455	9.23543	9.3468	8.55216	9.30392	9.82826	9.67	9.69011	9.69738	9.5085	9.63862	9.73337
ENSDARG00000030177	uchl3	Turquoise (M1)	9.2728	9.17468	9.06988	9.06407	9.17949	10.1426	9.89885	9.70649	9.89933	10.2605	9.62436	9.21489	9.50908	9.19687	9.18037	9.07506	9.23655	9.31227
ENSDARG00000030213	sap30l	Turquoise (M1)	8.76732	8.83136	8.77218	8.93938	8.86361	9.96547	9.96656	9.69519	9.77164	10.4445	8.82839	8.94782	8.79508	8.61137	8.86351	8.54035	8.78761	8.72638
ENSDARG00000030215	matn1	Turquoise (M1)	4.83168	5.00613	4.73353	4.53257	4.78307	5.7965	5.52863	5.66895	5.13429	6.12915	5.36317	5.58372	4.82872	4.7379	4.81693	4.77675	5.05742	4.52365
ENSDARG00000030224	ppp2ca	Turquoise (M1)	11.967	11.9996	11.9744	11.9547	11.9869	10.5146	10.6456	10.879	11.0474	10.0757	11.6765	11.7375	11.8071	11.9368	11.663	11.7956	11.823	11.9168
ENSDARG00000030236	tmem30aa	Turquoise (M1)	10.8543	10.9193	10.9915	10.9847	10.964	10.1975	10.7796	10.3929	10.5127	9.81941	10.6755	10.6246	10.8456	10.7736	10.7862	10.7828	10.8507	10.5765
ENSDARG00000030239	dennd6aa	Turquoise (M1)	9.74012	9.81636	9.66887	9.62839	9.70924	8.96033	9.22346	9.06278	8.99423	8.78293	9.27558	9.57278	9.52064	9.41521	9.61425	9.62412	9.65514	9.6209
ENSDARG00000030241	vbp1	Turquoise (M1)	9.41851	9.17205	9.07244	9.18773	9.22646	10.1496	10.1576	9.83994	10.0731	10.5425	9.89303	9.54323	9.19949	9.36947	9.20516	9.23315	9.37603	9.36062
ENSDARG00000030278	idh3a	Turquoise (M1)	10.0942	10.2031	10.2163	10.2526	10.2169	10.5815	10.468	10.4526	10.7102	10.516	10.3915	10.1138	10.1621	10.1508	10.1791	10.1477	10.0859	10.0848
ENSDARG00000030472	slc16a5a	Turquoise (M1)	7.65123	7.83452	7.76336	7.61206	7.6837	6.15928	6.53032	6.7824	6.85477	6.21195	8.03262	7.80617	7.78679	7.56905	7.61558	7.72839	7.61671	7.62262
ENSDARG00000030479	hmgb1b	Turquoise (M1)	11.4162	11.2837	11.3031	11.3273	11.3702	11.8834	12.1191	11.8249	12.0265	12.3838	11.2038	11.3097	11.3572	11.3826	11.1758	11.2233	11.1327	11.147
ENSDARG00000030560	helz	Turquoise (M1)	11.306	11.7067	11.9545	11.3612	11.617	10.8376	10.7535	11.4215	11.4738	10.7965	11.4184	11.5678	11.5871	11.641	11.5843	11.7403	11.6868	11.6205
ENSDARG00000030591	lrrc42	Turquoise (M1)	7.072	6.70537	6.98453	7.09071	6.94695	7.80326	7.53831	8.1257	7.542	7.72626	7.13507	6.75835	7.03314	6.67694	7.10501	6.97726	6.87878	6.78589
ENSDARG00000030598	nampta	Turquoise (M1)	10.6919	10.6309	10.8279	10.5926	10.709	9.24314	9.58129	9.72406	10.0258	9.00919	10.4802	11.0626	11.4988	10.9039	10.5661	10.5196	10.5408	10.7111
ENSDARG00000030633	plekhm3	Turquoise (M1)	9.75993	9.78739	9.92802	9.72337	9.80695	9.10628	9.15541	9.275	9.41996	8.95658	9.43601	9.6223	9.74419	9.87996	9.73827	9.81937	9.9211	9.71196
ENSDARG00000030644	gnai3	Turquoise (M1)	7.94243	7.95648	7.82569	7.7396	7.86322	6.79999	6.91599	6.89072	7.10654	6.28973	8.14021	7.82275	7.74112	7.66929	7.97573	8.02454	7.80739	8.01038
ENSDARG00000030722	xirp1	Turquoise (M1)	4.16044	4.85417	4.16044	4.16044	4.52177	5.2628	5.32189	6.39335	5.5138	5.7863	4.71069	4.47571	4.49681	4.7379	4.81693	4.41364	4.16044	4.52365
ENSDARG00000030761	syt16	Turquoise (M1)	8.04696	8.1355	8.09195	8.27005	8.14313	6.7755	6.82598	7.18195	7.29368	6.57685	7.21514	7.90811	8.1873	8.18552	8.19647	7.74345	8.0555	7.92458
ENSDARG00000030786	mpi	Turquoise (M1)	8.75419	8.8903	8.97733	8.73953	8.8671	7.11346	7.10209	7.24616	7.46656	6.70709	8.56255	8.66307	8.73673	8.76718	8.87128	8.7588	8.84321	8.97237
ENSDARG00000030803	zgc:110006	Turquoise (M1)	8.41894	8.2946	8.51784	8.21865	8.36234	6.7878	6.78552	6.99115	7.21254	6.36312	7.86257	7.96893	7.88	8.23287	8.24522	8.22766	8.1625	7.95153
ENSDARG00000030938	fermt3b	Turquoise (M1)	5.65667	6.08618	5.44937	5.81804	5.74044	7.93364	9.0031	8.38537	8.59816	8.61789	7.02063	6.81585	6.48894	6.64849	6.01631	5.65547	5.93368	6.12787
ENSDARG00000030949	srprb	Turquoise (M1)	8.76732	8.74172	8.77218	8.77942	8.79557	9.7297	9.83265	9.41144	9.40202	10.0402	9.0857	8.81935	8.73673	8.91355	8.62695	8.40081	8.4552	8.36089
ENSDARG00000030967	si:ch211-51a6.2	Turquoise (M1)	11.3509	10.8948	11.246	9.7028	10.8176	8.40478	8.20738	9.59283	8.88929	7.18096	8.3259	11.0065	10.7499	10.8199	10.8728	10.4911	10.9222	10.4089
ENSDARG00000030972	dnaja1	Turquoise (M1)	9.93866	9.92985	9.94207	9.85225	9.96347	8.84743	8.81651	8.77746	9.35719	8.60714	9.97208	10.1729	9.91157	9.81632	9.85832	9.68446	9.7124	9.91978
ENSDARG00000030981	tmem127	Turquoise (M1)	9.54576	9.45387	9.67224	9.44728	9.54247	8.1354	8.26127	8.44065	8.56624	7.72626	9.56706	9.60651	9.57894	9.6472	9.57439	9.43323	9.39364	9.62507
ENSDARG00000031015	dtna	Turquoise (M1)	10.6106	10.6687	10.5756	10.4919	10.5811	9.40553	9.93836	9.78773	10.3192	9.37885	10.0589	10.2663	10.4418	10.4965	10.515	10.48	10.6036	10.498
ENSDARG00000031075	cadm1a	Turquoise (M1)	11.0404	11.1375	11.1781	11.111	11.1322	9.09426	9.30482	9.54509	9.61258	8.57072	10.5951	10.6972	10.8827	11.0992	10.9324	11.1585	11.149	11.1266
ENSDARG00000031095	veph1	Turquoise (M1)	7.55286	7.47847	7.49793	7.42191	7.44081	5.38594	5.22523	5.63844	5.5138	5.20031	7.16227	7.42578	7.22723	7.15873	7.9091	7.90267	7.53103	7.95153
ENSDARG00000031098	timm50	Turquoise (M1)	8.26058	8.42454	8.36316	8.34119	8.37714	9.04017	9.28137	8.92026	9.10689	9.71668	8.86148	8.66307	8.53077	8.58246	8.55637	8.3181	8.3995	8.35587
ENSDARG00000031108	lrba	Turquoise (M1)	11.65	11.762	11.6587	11.653	11.6604	11.4004	11.5207	11.6055	11.5751	11.2337	11.5735	11.5377	11.5061	11.6427	11.6879	11.636	11.6716	11.7416
ENSDARG00000031116	dnal4a	Turquoise (M1)	8.93571	9.07662	9.01507	9.05435	9.01611	7.94444	7.50601	8.05649	8.00763	7.32948	8.37263	8.6259	9.01008	8.80206	9.00792	9.06019	9.28219	9.01116
ENSDARG00000031136	moxd1	Turquoise (M1)	6.98318	5.7884	5.41085	5.81804	5.92987	8.53155	9.17082	7.5147	8.74476	9.68471	8.03262	7.23111	6.29585	6.44731	7.34997	7.02794	6.12808	7.72795
ENSDARG00000031164	tuba8l2	Turquoise (M1)	9.28197	9.45604	9.50056	9.22285	9.38096	10.3767	9.58513	9.85887	9.79474	10.3087	9.65925	9.0116	9.26742	9.49289	8.71165	9.19828	9.17419	8.78728
ENSDARG00000031198	hmg20a	Turquoise (M1)	8.68667	8.80777	8.73063	8.55413	8.7203	9.0149	9.07855	8.92856	9.15055	9.12662	8.52859	8.72588	8.72344	8.58974	8.61311	8.71579	8.61417	8.72638
ENSDARG00000031202	alg11	Turquoise (M1)	8.86826	8.83803	8.82779	8.7636	8.84601	9.53379	9.93085	9.42518	9.50649	9.60785	8.89116	8.94782	8.81714	8.73471	8.80386	8.64378	8.72978	8.37586
ENSDARG00000031216	ssu72	Turquoise (M1)	9.12093	9.17468	9.40232	8.9464	9.19068	9.6727	9.80002	9.28365	9.73548	9.91821	9.12709	9.35192	9.18261	9.25292	9.07671	9.07062	9.12756	9.33283
ENSDARG00000031222	lhx2b	Turquoise (M1)	9.65565	9.25408	9.37149	8.71505	9.23999	7.98159	7.62351	8.38133	8.63281	7.6011	8.79166	9.74563	9.7863	9.3331	9.56724	9.75164	9.61816	10.048
ENSDARG00000031261	sap30bp	Turquoise (M1)	8.76732	8.83136	8.85481	8.81441	8.85308	9.23878	9.0894	9.05269	8.95919	9.26737	8.77148	8.81386	8.85725	8.74127	8.87515	8.73839	8.78761	8.83132
ENSDARG00000031269	rnf123	Turquoise (M1)	10.6953	10.8118	10.9238	10.7472	10.7559	9.17633	9.22838	9.70809	9.73389	8.96501	10.1687	10.5249	10.5881	10.5459	10.7212	10.7508	10.8845	10.8297
ENSDARG00000031293	dnajc9	Turquoise (M1)	8.57655	8.54776	8.66087	8.73953	8.6571	9.57758	9.59277	9.60322	9.37774	10.0834	8.92547	8.72295	8.7662	8.51138	8.43568	8.30046	8.5683	8.30984
ENSDARG00000031316	six6b	Turquoise (M1)	4.83168	4.5098	4.16044	4.53257	4.52177	5.84823	6.21452	4.81301	6.08131	6.19175	5.36317	4.47571	4.49681	4.16044	4.91637	4.41364	4.16044	4.16044
ENSDARG00000031325	tmed1a	Turquoise (M1)	4.16044	4.5098	4.16044	4.16044	4.52177	4.94917	4.7528	5.22737	5.32161	5.63515	4.79455	4.70437	4.49681	4.16044	4.16044	4.16044	4.16044	4.78628
ENSDARG00000031345	si:dkey-40c11.1	Turquoise (M1)	8.64458	8.41564	9.16406	9.1023	8.83891	6.91628	7.03519	7.29895	7.34527	6.39833	8.96406	8.52182	8.30819	8.75104	8.90951	8.88399	8.71583	8.73027
ENSDARG00000031387	cers4a	Turquoise (M1)	9.80515	9.79939	9.88793	9.86527	9.86569	8.75272	9.11352	9.14814	9.21822	8.33037	9.30392	9.70765	9.59544	9.58308	9.85637	9.79804	9.84953	9.66614
ENSDARG00000031422	igfbp2b	Turquoise (M1)	7.98817	8.16771	8.18026	8.13483	8.08416	6.91628	6.59484	6.94741	7.34527	6.30847	7.99821	7.86073	7.92733	8.36195	7.92418	8.51438	8.26205	8.33559
ENSDARG00000031494	prrc2a	Turquoise (M1)	13.5126	13.5132	13.594	13.5041	13.5411	12.6302	12.7448	12.8639	13.0885	12.3659	13.2131	13.3646	13.4179	13.4639	13.432	13.4233	13.4938	13.4386
ENSDARG00000031495	seta	Turquoise (M1)	11.3661	11.3049	11.2197	11.2329	11.301	12.0083	12.3345	11.9604	12.0678	12.2062	11.3747	11.3458	11.3136	11.203	11.1703	11.1089	11.1419	11.2706
ENSDARG00000031496	ap1ar	Turquoise (M1)	10.6873	10.6241	10.6656	10.6826	10.6606	11.556	11.6576	11.0877	11.3669	11.7986	10.5561	10.4978	10.6734	10.4702	10.598	10.5223	10.5388	10.5161
ENSDARG00000031540	tmem200a	Turquoise (M1)	10.2626	10.3767	10.495	10.3013	10.3587	8.46957	8.69027	8.90352	8.93996	7.9815	9.25706	9.67017	9.81631	9.73997	10.2343	10.0867	10.102	9.95002
ENSDARG00000031560	srpk1b	Turquoise (M1)	11.9218	12.0546	12.2388	12.2348	12.15	10.3757	10.1806	10.8029	10.7525	9.91096	11.0558	11.8706	11.8004	11.8192	11.8019	11.6077	11.9085	11.7559
ENSDARG00000031600	rd3	Turquoise (M1)	7.4797	7.43474	7.51321	6.72408	7.31209	6.25401	6.23537	6.32469	6.7159	5.86837	6.78258	7.14501	6.94256	7.17844	7.68821	7.1585	7.89083	7.2712
ENSDARG00000031618	unm_sa1261	Turquoise (M1)	10.7191	10.8436	10.8966	11.0092	10.8689	7.99202	8.3039	8.05142	8.81281	7.81025	9.67638	9.63481	9.7815	10.1967	9.9101	9.83079	10.1954	9.76584
ENSDARG00000031657	fahd1	Turquoise (M1)	6.30403	6.15632	6.13522	6.11776	6.19201	6.90508	6.72964	6.91368	6.5907	6.93531	6.78258	6.41222	6.04613	6.22986	5.98563	6.06343	6.15039	5.84684
ENSDARG00000031680	ercc1	Turquoise (M1)	7.7957	7.52921	7.63684	7.3701	7.59318	8.3122	8.27085	8.21909	7.92027	8.22169	7.80677	7.61602	7.57978	7.74991	7.83921	7.55132	7.85931	7.62262
ENSDARG00000031702	prkg1b	Turquoise (M1)	10.4176	10.2699	10.3903	10.3837	10.3475	9.08701	8.99735	9.54149	9.6902	9.57885	9.82204	9.77276	10.2881	10.1483	10.1411	10.094	10.5721	10.2411
ENSDARG00000031712	grm3	Turquoise (M1)	13.099	12.8138	13.0981	13.1571	12.9769	10.106	9.91265	10.5126	10.5521	9.47052	11.7512	12.3108	13.0011	12.904	13.1377	13.106	13.0532	13.3371
ENSDARG00000031751	npr1a	Turquoise (M1)	11.142	11.2554	11.3333	11.1095	11.196	10.0058	10.3114	10.1698	10.8035	9.88602	10.9369	10.7267	11.3399	10.9377	11.1101	10.9079	10.964	10.6541
ENSDARG00000031756	mef2aa	Turquoise (M1)	11.3319	11.5877	11.7525	11.585	11.5627	9.70307	10.4835	10.1344	10.0464	9.44664	10.9465	11.3062	11.4988	11.703	11.4606	11.4941	11.6806	11.4298
ENSDARG00000031774	pus7	Turquoise (M1)	8.44098	8.63082	8.83685	8.35182	8.58677	9.14639	9.57552	9.02974	9.13373	9.49401	8.63456	8.66307	8.53839	8.53798	8.48214	8.36491	8.58759	8.49942
ENSDARG00000031777	pparaa	Turquoise (M1)	9.17773	9.28855	9.47565	8.93585	9.23189	8.73114	8.78681	8.84041	8.46598	8.39433	8.84778	8.9947	9.33229	9.28015	9.35111	9.27494	9.20196	9.18803
ENSDARG00000031795	abcf1	Turquoise (M1)	10.2564	10.2198	10.255	10.2095	10.2811	11.6326	11.778	11.2803	11.4823	12.1922	11.0957	10.648	10.4028	10.4633	10.2729	10.1817	10.102	10.215
ENSDARG00000031817	trim2a	Turquoise (M1)	11.2244	10.8328	11.1662	10.9736	11.0517	8.01268	7.69677	8.2236	8.64645	7.64406	10.4515	10.4806	10.9512	10.3111	10.7382	10.9265	10.8649	10.5636
ENSDARG00000031845	mboat2a	Turquoise (M1)	10.0084	10.1154	10.2197	10.0638	10.055	9.51229	9.55806	9.96746	9.77164	9.11908	9.93375	10.2005	9.94341	10.0569	10.1962	10.1721	10.2227	10.237
ENSDARG00000031971	kdelc1	Turquoise (M1)	8.66344	8.69471	8.4406	8.55413	8.60363	9.38399	9.4716	9.56118	9.30877	9.14653	8.90973	8.67221	8.42379	8.23752	8.43568	8.3181	8.38191	8.6382
ENSDARG00000031976	nos2b	Turquoise (M1)	7.75211	7.80061	7.80728	7.834	7.81316	8.82433	8.35434	8.41721	8.02866	8.70781	7.70657	7.68429	7.65219	7.78219	7.7573	7.95526	7.91555	7.83328
ENSDARG00000032013	pafah1b1a	Turquoise (M1)	11.9503	11.9658	12.0623	11.8948	11.9893	11.2326	11.1319	11.4535	11.6908	10.8453	11.8625	11.8199	11.9172	11.9029	12.0689	12.0894	12.1491	12.0549
ENSDARG00000032037	bet1l	Turquoise (M1)	7.22145	7.29479	7.24634	7.14132	7.23758	7.84422	8.47527	7.99439	7.83321	8.15918	7.12589	7.1361	7.11817	7.12862	7.23283	7.2031	7.50673	7.1354
ENSDARG00000032039	mxd1	Turquoise (M1)	11.1736	11.2422	11.2179	11.1996	11.1552	9.3256	9.42313	9.5963	10.0361	8.96501	10.5048	10.9344	11.0555	11.14	11.003	10.9005	11.0428	10.7373
ENSDARG00000032072	cdk16	Turquoise (M1)	11.2894	11.2541	11.3871	11.2988	11.2893	9.31942	9.4716	9.7161	9.65023	8.8268	10.9864	11.0065	11.2577	11.1718	10.9591	11.0356	11.2266	11.1295
ENSDARG00000032079	acsl3a	Turquoise (M1)	8.32129	7.84786	8.25895	6.7897	7.80586	5.56261	5.45088	5.93652	6.12366	5.20031	6.6719	7.67212	7.60189	7.31807	8.19647	7.85501	8.1625	7.96482
ENSDARG00000032102	prdx3	Turquoise (M1)	8.99642	9.0539	9.3839	9.11793	9.16255	10.0223	9.88336	9.8178	9.81447	10.384	9.54009	9.19813	9.25363	9.37369	9.24156	8.98033	9.06844	9.02702
ENSDARG00000032129	gtf2f1	Turquoise (M1)	8.84368	8.81455	8.59826	8.37286	8.71643	9.59983	9.17082	9.25974	9.12403	9.90805	8.54567	8.80557	8.83579	8.6812	8.43043	8.67926	8.72978	8.46252
ENSDARG00000032155	ppm1aa	Turquoise (M1)	11.6292	11.6453	11.803	11.615	11.6774	9.58618	9.79506	10.024	10.2629	9.30328	11.3594	11.2382	11.5654	11.5563	11.4235	11.3958	11.4948	11.4382
ENSDARG00000032157	grk6	Turquoise (M1)	9.39616	9.46898	9.46596	9.3918	9.38826	7.79133	7.88383	8.20546	8.32038	7.51107	9.06692	9.19179	9.16797	9.19925	9.25349	9.37439	9.46412	9.30968
ENSDARG00000032175	puf60a	Turquoise (M1)	10.6953	10.5601	10.8571	10.569	10.6895	11.0295	11.2325	10.8408	11.2102	11.2687	10.5836	10.747	10.5872	10.5973	10.3815	10.7439	10.5139	10.5395
ENSDARG00000032197	klf12b	Turquoise (M1)	10.5231	10.4825	10.3954	10.9511	10.5423	7.79133	8.3039	7.91835	8.29026	7.39825	9.64191	10.2882	10.1386	10.3996	10.5088	10.49	10.5028	10.7335
ENSDARG00000032237	anapc4	Turquoise (M1)	8.97395	9.20594	8.81561	8.96034	9.00664	9.33175	9.36184	9.27933	8.90921	9.64154	9.0857	9.21905	8.99357	9.05955	8.96138	8.72901	8.91822	8.65464
ENSDARG00000032238	dnm3a	Turquoise (M1)	8.84368	8.95921	8.78472	8.75562	8.83891	9.59302	10.8418	9.65078	9.78401	10.0783	9.51779	8.66307	9.0291	8.90482	8.90194	8.87722	9.11168	9.49207
ENSDARG00000032296	pomp	Turquoise (M1)	9.29108	9.21877	9.14474	9.29887	9.26137	10.4836	10.9311	10.3307	10.1893	11.0151	10.1364	9.71061	9.40063	9.48316	9.31741	9.06765	9.10367	9.06131
ENSDARG00000032298	tbc1d20	Turquoise (M1)	8.70498	8.90626	9.13987	8.87088	8.92857	8.17713	8.74623	8.19171	8.50767	7.67889	8.61204	8.91484	8.8542	8.75428	8.7543	8.95804	8.81077	9.12754
ENSDARG00000032552	march5	Turquoise (M1)	9.67201	9.87584	9.83018	9.70072	9.80331	8.00754	8.11988	8.32787	8.63623	7.67199	9.28577	9.50796	9.5697	9.64021	9.48868	9.60991	9.71591	9.62299
ENSDARG00000032577	clcn6	Turquoise (M1)	10.43	10.6309	10.5111	10.7573	10.5693	9.33379	9.70629	9.84725	9.91628	9.02272	9.98339	10.2592	10.4111	10.3544	10.3936	10.4552	10.5139	10.5003
ENSDARG00000032601	macrod2	Turquoise (M1)	10.2931	10.4284	10.5317	10.6004	10.4833	9.71409	9.80661	10.1248	10.0477	9.34264	10.3328	10.3949	10.2926	10.5365	10.49	10.4115	10.473	10.5183
ENSDARG00000032627	SCYL2	Turquoise (M1)	10.8857	10.6817	10.9854	10.7731	10.8435	10.0287	10.5517	10.1756	10.1202	10.2987	10.6639	10.6587	10.8525	10.7981	10.6676	10.7531	10.8314	10.7209
ENSDARG00000032651	ppp1r10	Turquoise (M1)	11.4886	11.6108	11.4568	11.7564	11.5946	11.0483	11.6151	11.2331	11.3929	11.0571	11.5543	11.5231	11.5027	11.5586	11.5713	11.6057	11.6452	11.7208
ENSDARG00000032761	pde4d	Turquoise (M1)	10.7426	10.768	10.7873	10.7849	10.6954	8.66113	9.02022	8.9147	9.58634	8.58174	10.184	10.0311	10.2835	10.2867	10.3787	10.5729	10.4936	10.535
ENSDARG00000032780	pigf	Turquoise (M1)	7.88715	7.99292	8.1611	8.0458	8.03516	9.10867	9.04551	8.82863	8.83083	9.07301	8.26113	8.0225	7.83726	7.86889	7.80701	7.75091	8.13649	7.84052
ENSDARG00000032795	tmem8a	Turquoise (M1)	9.14794	9.31507	9.35267	8.67331	9.11928	7.97634	8.3132	8.73392	8.50393	7.67199	8.90973	8.87845	8.77589	9.17286	8.71165	8.93215	9.3333	9.14798
ENSDARG00000032816	tm7sf2	Turquoise (M1)	9.08295	9.03661	8.80334	8.58148	8.88099	9.39578	10.2535	9.49012	9.79779	10.2524	8.43633	8.25573	8.94001	8.32312	8.7793	8.45645	8.19813	8.41984
ENSDARG00000032859	fam84b	Turquoise (M1)	7.34473	6.74967	7.11149	6.86755	7.0127	7.95515	7.89007	7.39087	7.7783	7.73951	7.2744	6.90313	7.04405	6.30644	7.10501	6.93133	6.73027	6.91711
ENSDARG00000032865	pacsin1a	Turquoise (M1)	13.0279	13.0363	13.1691	13.103	13.11	10.7238	10.8546	11.0382	11.4351	10.384	12.3137	12.6562	12.8404	12.8587	12.8497	12.7916	12.9304	12.7587
ENSDARG00000032866	erh	Turquoise (M1)	9.72451	9.82812	9.60847	9.83156	9.78498	10.6163	10.6103	10.2851	10.3192	11.1251	10.002	9.80908	9.90129	9.82712	9.65304	9.64119	9.61441	9.56987
ENSDARG00000032919	chchd3a	Turquoise (M1)	8.74093	8.59974	8.7176	8.64766	8.68905	9.26044	9.09748	8.88374	8.95919	9.59523	9.15849	8.79446	8.79508	8.86639	8.76685	8.64776	8.8655	8.62574
ENSDARG00000032929	cryba1l1	Turquoise (M1)	4.83168	5.0718	4.89714	4.80149	4.87758	5.2628	5.49048	5.27263	5.54829	5.99378	5.10246	4.7873	4.74046	4.7379	5.27911	4.72375	4.92193	5.03884
ENSDARG00000032951	nrbp2a	Turquoise (M1)	10.2235	10.1195	10.1008	10.2582	10.1935	8.51721	8.75988	8.80177	8.86328	8.00906	9.26943	9.9307	9.98155	10.1285	10.0568	9.8525	10.1404	9.91297
ENSDARG00000032959	kcnc1b	Turquoise (M1)	10.1011	10.547	10.739	10.385	10.4604	8.79195	8.52413	9.32821	9.58457	8.71116	9.78231	9.66561	10.0092	10.2297	9.87772	10.2129	10.3678	10.3178
ENSDARG00000032970	cox4i1	Turquoise (M1)	11.5756	11.5148	11.6523	11.6711	11.6381	12.5516	12.5356	12.2491	12.2254	12.9098	11.7734	11.531	11.5898	11.5898	11.4102	11.2776	11.3702	11.2451
ENSDARG00000032985	mrpl27	Turquoise (M1)	6.67622	6.93933	6.72974	6.99746	6.86368	7.63988	7.56989	7.32462	7.51231	7.93052	7.43112	6.90313	7.28333	6.93291	6.91911	6.64291	6.82662	6.53455
ENSDARG00000032990	plxnb3	Turquoise (M1)	9.44868	9.97588	10.7032	9.92155	9.96997	8.40088	7.85856	8.03609	9.22504	7.94772	10.079	9.46832	9.68891	9.75135	10.1411	10.6904	9.95708	10.1485
ENSDARG00000032997	rnf185	Turquoise (M1)	8.82706	8.7699	8.91879	8.95687	8.89132	9.16948	9.23572	9.18323	9.05422	9.57151	8.63775	8.76912	8.60517	8.61851	8.55154	8.50342	8.55267	8.42465
ENSDARG00000033012	pcnt	Turquoise (M1)	11.0232	11.1266	11.1787	11.0906	11.1014	10.5892	10.5952	11.0521	10.7798	10.2363	11.0349	11.2641	10.9884	11.0986	11.2007	11.1547	11.1129	11.0886
ENSDARG00000033071	trim35-10	Turquoise (M1)	5.10153	5.0718	4.73353	5.25359	5.0344	7.52912	8.13572	7.73398	6.78077	6.93531	6.43431	5.94072	5.53787	5.72662	5.62584	5.26691	5.22554	5.67703
ENSDARG00000033175	snrpe	Turquoise (M1)	8.11033	7.9	7.89705	8.14711	8.04138	9.7328	9.94285	9.31983	9.4725	10.1807	8.55245	8.15043	8.00104	7.98426	8.0668	7.87563	7.92775	7.87615
ENSDARG00000033179	tmem243b	Turquoise (M1)	7.6321	7.29479	7.49793	7.7396	7.55004	8.10689	8.35884	7.86144	7.997	8.49887	7.40114	7.38145	7.28333	7.59114	7.10501	7.38794	7.23758	7.40486
ENSDARG00000033201	zgc:101840	Turquoise (M1)	9.4323	9.66346	9.71542	9.51021	9.61276	10.0274	10.0742	9.96746	10.7111	10.5805	9.75325	9.26404	9.38174	9.35033	9.59329	9.72552	9.5432	9.77713
ENSDARG00000033251	osbpl3a	Turquoise (M1)	5.17407	5.42952	4.82077	5.30984	5.16471	6.21695	5.95923	6.59471	6.83055	6.69322	6.20052	5.48988	5.1522	5.03497	5.08118	4.98981	5.17307	5.28348
ENSDARG00000033259	dis3l2	Turquoise (M1)	10.7926	10.6509	10.7253	10.7927	10.7436	9.53201	9.78343	9.95128	10.1764	9.48036	10.1498	10.4268	10.6367	10.5337	10.5553	10.5043	10.6243	10.5317
ENSDARG00000033296	gpr37b	Turquoise (M1)	11.4592	11.4456	11.6277	11.5549	11.5459	9.74514	9.81969	10.193	10.2793	9.1216	10.8822	10.8282	11.4331	11.6566	11.3344	11.6222	11.4649	11.4411
ENSDARG00000033327	unc5b	Turquoise (M1)	10.4799	9.79768	9.71869	9.54068	9.86395	8.53867	8.37225	8.66602	8.96463	8.11932	9.29386	9.32128	9.69572	9.2779	10.3047	9.69795	9.39364	9.852
ENSDARG00000033355	zgc:101699	Turquoise (M1)	4.5503	4.85417	4.16044	5.36297	4.78307	10.4283	8.5675	10.2525	9.3757	9.49401	6.74667	5.27176	6.95421	6.14844	4.54163	5.02565	4.16044	4.52365
ENSDARG00000033364	mgst3b	Turquoise (M1)	9.13787	8.83136	8.83685	9.45469	9.09268	10.0952	10.0466	9.9114	9.39195	10.2559	9.52297	9.46132	9.11045	9.25521	9.24156	9.0587	8.96023	9.13633
ENSDARG00000033367	rrm2b	Turquoise (M1)	9.55083	9.38273	9.5213	10.046	9.70924	8.22653	9.03713	8.23706	8.99157	8.57808	9.66706	9.25799	9.45989	9.86356	9.81069	9.29539	9.34919	9.35058
ENSDARG00000033370	ppil3	Turquoise (M1)	6.83826	6.38496	6.51335	6.48578	6.56061	7.84997	7.57768	7.56565	7.78451	7.63699	6.64603	6.81585	6.58351	6.58974	6.64942	6.60109	6.49744	6.70718
ENSDARG00000033418	gpatch1	Turquoise (M1)	9.4323	9.28855	9.21126	9.38665	9.35384	9.81704	9.97973	9.76322	9.48012	10.1027	9.27558	9.39116	9.34318	9.42134	9.46579	9.36233	9.36714	9.39279
ENSDARG00000033440	metap1	Turquoise (M1)	10.1768	10.31	10.1403	10.1845	10.2251	10.821	10.9015	10.6856	10.8528	10.9649	10.321	10.3426	10.2676	10.2215	10.4963	10.2129	10.2912	10.3783
ENSDARG00000033450	nkap	Turquoise (M1)	9.1345	9.01029	8.93013	9.15477	9.11341	9.91175	10.0014	9.60667	9.60563	10.3671	8.93327	8.96031	9.0291	9.08809	8.96864	8.97399	8.93035	8.94257
ENSDARG00000033451	fam173b	Turquoise (M1)	6.78635	6.2442	6.68914	6.69004	6.6132	7.4011	7.50601	7.2551	6.94762	7.15127	6.60627	6.58308	6.5682	6.36105	6.55286	6.47656	6.27663	6.29281
ENSDARG00000033489	ube2j1	Turquoise (M1)	10.5712	10.5722	10.5756	10.6356	10.5874	9.37409	9.31178	9.5963	9.76853	8.91364	9.95432	10.3577	10.3303	10.4078	10.2787	10.3523	10.4905	10.4866
ENSDARG00000033498	rorb	Turquoise (M1)	7.42502	7.5782	7.62285	7.05151	7.40244	5.30563	5.45088	5.91232	6.01498	5.60232	6.91748	7.66599	7.74112	7.7758	7.43714	7.87563	7.71877	7.99751
ENSDARG00000033533	ccdc115	Turquoise (M1)	7.6029	7.43474	7.37774	7.54837	7.54126	8.20876	8.13046	8.11601	8.21439	8.53713	7.56545	7.5376	7.49561	7.62006	7.57783	7.23028	7.33313	7.46252
ENSDARG00000033567	fkbp1ab	Turquoise (M1)	10.8053	10.5234	10.7097	10.5825	10.7283	9.34397	9.55611	9.63397	9.84872	8.90197	10.4623	10.4268	10.7958	10.2845	10.4875	10.4167	10.7458	10.2586
ENSDARG00000033587	CABZ01088134.1	Turquoise (M1)	4.16044	4.16044	4.16044	4.53257	4.52177	6.45661	6.49685	6.67834	5.73517	7.03666	4.71069	4.70437	5.25234	4.97182	4.81693	4.59788	4.50414	5.03884
ENSDARG00000033596	polr2c	Turquoise (M1)	8.27293	8.34706	8.34631	8.36763	8.35737	9.24096	9.26232	9.00117	9.03104	9.66243	8.78016	8.51844	8.51927	8.62206	8.50231	8.24094	8.20315	8.3202
ENSDARG00000033647	smarcb1a	Turquoise (M1)	9.80726	9.79426	9.81193	9.82205	9.83573	10.1715	10.1615	10.0419	10.202	10.3975	9.84426	9.70321	9.63498	9.75782	9.77803	9.70847	9.71766	9.8591
ENSDARG00000033666	pi4k2a	Turquoise (M1)	8.96259	9.03661	9.25246	9.16082	9.11635	8.43181	8.61712	8.92303	9.05677	8.45157	9.22141	9.20443	9.23034	9.24603	9.04959	9.12876	9.24628	9.10978
ENSDARG00000033754	rbm48	Turquoise (M1)	7.45808	7.47847	7.35242	7.42191	7.44081	7.97107	7.60078	7.72122	7.74048	8.19318	7.26608	7.57735	7.32842	7.60567	7.34997	7.23028	7.47368	7.43399
ENSDARG00000033789	ndufb7	Turquoise (M1)	8.30334	8.45526	8.62643	8.48338	8.52615	9.26688	9.27188	9.20843	8.94823	9.87712	8.4832	8.29577	8.3521	8.37043	8.33238	8.24884	8.12065	8.25691
ENSDARG00000033802	cyp27a7	Turquoise (M1)	8.13084	8.20438	7.94833	8.18333	8.14313	7.68575	8.04358	7.74662	7.6818	7.38984	7.98822	8.28388	7.94468	8.03863	8.37131	8.3181	8.37304	8.37586
ENSDARG00000033804	snx27a	Turquoise (M1)	10.0029	10.1915	10.3779	10.2254	10.2128	8.65787	8.80667	9.08522	8.90355	8.14932	10.2045	10.2358	10.0877	10.0516	9.97276	10.0215	10.018	10.1281
ENSDARG00000033840	fat3a	Turquoise (M1)	13.8748	13.9765	13.9405	13.8685	13.8417	12.0057	12.1508	12.3459	12.2562	11.4107	13.4837	13.5795	13.7717	13.8214	13.7539	13.7999	13.9584	13.8625
ENSDARG00000033845	igsf9ba	Turquoise (M1)	11.9741	12.2684	12.0574	12.183	12.132	11.4596	11.0259	11.7458	11.1058	11.2325	11.6579	11.8537	12.122	12.0983	12.0024	12.3653	12.2633	12.2494
ENSDARG00000033855	cnot9	Turquoise (M1)	8.72307	8.67621	8.75952	8.72734	8.73949	9.50505	9.24059	9.23988	9.30449	9.60964	9.03586	8.90712	8.64098	8.72813	8.58028	8.6909	8.59523	8.65872
ENSDARG00000033871	derl3	Turquoise (M1)	7.19543	7.47847	7.50559	7.84914	7.50555	8.03303	7.82634	7.68882	7.81514	8.36909	7.86257	7.52409	7.42281	7.59114	7.6704	7.29856	7.56279	7.14723
ENSDARG00000033899	ap2m1b	Turquoise (M1)	12.2966	12.3551	12.5234	12.3378	12.4202	11.5295	11.6793	11.9111	12.2384	11.4255	12.4557	12.2708	12.4296	12.3988	12.3917	12.2962	12.4181	12.293
ENSDARG00000033973	mrps23	Turquoise (M1)	7.82964	7.59417	7.83177	7.80322	7.79115	8.65787	8.44174	8.31525	8.41509	8.9049	8.12207	7.90811	7.90977	7.96754	7.73179	7.46289	7.71877	7.78909
ENSDARG00000033999	cyp26a1	Turquoise (M1)	7.42502	7.67138	7.60159	7.67301	7.61007	8.88977	9.3752	8.68575	8.89216	8.94525	8.61204	7.65984	7.78036	7.96754	7.9091	7.76204	7.8783	7.72795
ENSDARG00000034060	elac2	Turquoise (M1)	8.99642	8.99247	8.97185	8.98784	8.99711	9.56892	9.41669	9.30504	9.46867	9.77377	8.89116	8.69332	8.91684	8.86039	8.77101	8.65966	8.9837	8.77981
ENSDARG00000034076	lrp11	Turquoise (M1)	9.55588	9.74371	10.005	9.67561	9.78129	8.65132	8.88351	8.95859	9.28503	8.26798	9.47392	9.37447	9.68891	9.72354	9.61194	9.60991	9.70713	9.55465
ENSDARG00000034117	rarga	Turquoise (M1)	9.12093	9.34111	9.33574	9.40969	9.32367	8.74351	8.05473	8.72759	8.71273	8.34339	9.01885	9.25799	8.97687	9.35461	9.26827	9.30298	9.17928	9.29404
ENSDARG00000034160	slc4a1ap	Turquoise (M1)	10.6453	10.995	10.5855	10.7859	10.7709	9.1922	9.56196	9.14814	9.64515	9.43859	10.4195	10.4168	10.6552	10.3242	10.5613	10.6202	10.5798	10.5025
ENSDARG00000034165	lingo1a	Turquoise (M1)	11.3164	11.3591	11.4543	11.4285	11.3677	8.9309	9.18099	9.30716	9.59865	8.61789	10.7016	10.9262	11.1749	11.2473	11.0703	11.0459	11.1016	11.1347
ENSDARG00000034174	mrrf	Turquoise (M1)	7.78709	8.01671	7.84387	7.91535	7.90478	8.42798	8.3039	7.92946	8.29893	8.35201	7.96294	7.77808	7.74112	7.95628	7.9091	7.76204	7.77395	7.84052
ENSDARG00000034178	cpsf1	Turquoise (M1)	10.6334	10.5531	10.5747	10.6699	10.6219	10.0783	10.0591	10.5417	10.4588	10.0873	10.681	10.7179	10.3903	10.5224	10.7006	10.6004	10.613	10.5926
ENSDARG00000034195	top2b	Turquoise (M1)	12.9073	12.9326	12.8732	12.9059	12.923	12.4031	12.4826	12.6873	12.8624	12.4241	12.6418	12.7848	12.8097	12.8386	12.9048	12.9452	12.9873	13.0432
ENSDARG00000034210	si:dkey-240h12.4	Turquoise (M1)	8.97017	8.83136	8.94975	9.19365	8.98431	7.93905	8.10387	8.1401	8.53725	7.59381	9.25498	8.98006	8.97126	9.09065	9.25942	8.79338	9.06844	8.49028
ENSDARG00000034215	rab42a	Turquoise (M1)	10.2595	10.4184	10.38	10.3324	10.3612	9.03515	8.78681	9.04254	9.47441	8.70446	9.62276	9.77276	10.1411	10.0906	10.2903	10.2779	10.3567	10.2852
ENSDARG00000034227	si:dkey-243i1.1	Turquoise (M1)	8.84781	8.77338	8.73387	8.73953	8.82101	7.81508	8.41608	8.05649	8.59112	7.91894	8.5659	8.66307	8.88138	8.93656	8.95408	8.88905	9.07937	9.63958
ENSDARG00000034321	palmdb	Turquoise (M1)	10.1833	10.0408	10.1585	10.2652	10.2114	8.1354	8.0931	8.38939	8.70624	7.98706	9.33761	9.42577	9.88648	9.76907	9.84656	9.82728	9.99074	10.0134
ENSDARG00000034375	chst11	Turquoise (M1)	9.68359	10.0234	10.0983	9.92865	9.95693	9.24965	9.27663	9.65578	9.87786	9.06257	9.71156	9.99274	10.0993	9.96905	9.92322	10.0269	10.1101	10.0134
ENSDARG00000034453	unc119a	Turquoise (M1)	8.44098	8.58791	8.47974	8.77942	8.63267	6.99222	7.39564	7.03355	7.42728	6.7344	8.15367	8.07874	8.0972	8.22821	8.43043	8.13683	7.95184	8.38575
ENSDARG00000034503	per2	Turquoise (M1)	12.3736	12.231	12.5838	12.1838	12.3623	10.2857	10.8625	10.9928	11.229	10.5977	11.5077	11.8277	11.9482	11.9393	11.678	11.6594	11.653	11.6952
ENSDARG00000034568	fitm2	Turquoise (M1)	7.74323	7.75882	7.44311	7.59415	7.65958	8.21322	8.80996	7.98377	8.26394	8.14437	7.96294	7.44743	7.70076	7.61288	7.29262	7.36856	7.23758	7.35494
ENSDARG00000034633	emc9	Turquoise (M1)	8.74978	8.68364	8.71433	8.53093	8.69299	9.27754	9.46537	9.12186	9.36338	9.79125	8.83117	8.61646	8.5535	8.38726	8.78753	8.54035	8.58375	8.54865
ENSDARG00000034685	tmem198b	Turquoise (M1)	10.6653	10.5831	10.722	10.596	10.6716	11.0839	12.1041	11.5475	11.9819	11.957	10.9932	10.3995	10.7092	10.7282	10.6709	10.4473	10.6701	10.18
ENSDARG00000034768	phf3	Turquoise (M1)	10.6907	10.7922	10.7253	10.8283	10.7662	10.3139	10.3681	10.6692	10.6303	10.3186	10.6856	10.7201	10.7301	10.7744	10.7975	10.7751	10.8523	10.8197
ENSDARG00000034852	nt5c2l1	Turquoise (M1)	7.99565	7.0488	7.74412	9.43984	8.02892	9.72192	9.03432	10.4941	9.42787	10.2842	7.59217	8.15043	7.74112	6.75888	7.03642	6.80571	7.93381	7.08703
ENSDARG00000034871	mid2	Turquoise (M1)	10.1784	10.4405	10.4544	10.3694	10.3624	8.15873	8.4794	8.37324	8.84567	7.82275	10.0314	9.98544	10.0576	10.0008	10.1217	9.96203	9.97328	9.81779
ENSDARG00000034883	acbd5a	Turquoise (M1)	9.86534	9.8045	9.73169	9.86156	9.84461	9.25614	9.17591	9.30292	9.18828	8.94241	9.37053	9.69577	9.68549	9.56659	9.72762	9.93704	9.72811	9.6209
ENSDARG00000034893	rarab	Turquoise (M1)	9.37347	9.61579	9.59786	9.71518	9.57698	8.56332	8.77677	9.05016	9.097	8.47935	9.26119	9.53824	9.44378	9.61193	9.67094	9.45838	9.7624	9.65394
ENSDARG00000034896	ldb2b	Turquoise (M1)	10.7797	10.9162	10.751	10.9326	10.8716	9.7078	9.09479	9.7129	9.99817	9.70666	10.2067	10.6057	10.6639	10.6685	10.9324	10.9692	11.0118	10.9707
ENSDARG00000034907	paqr7b	Turquoise (M1)	10.9046	10.9995	11.0517	11.1327	11.02	9.16719	9.23328	9.44459	9.72269	8.84216	10.7619	10.7209	10.8812	10.8677	10.6897	10.5497	10.6391	10.717
ENSDARG00000034933	chchd3b	Turquoise (M1)	6.02245	5.6235	5.97955	5.71127	5.83894	6.83592	7.53031	6.89072	6.86673	6.70709	6.35553	5.98395	5.57289	5.89278	6.10405	6.05053	5.76433	6.02301
ENSDARG00000034957	hddc2	Turquoise (M1)	6.67622	6.73507	6.46555	6.80563	6.68027	7.57865	7.79337	7.2551	7.7147	8.15918	7.40114	6.97521	6.83302	6.89742	7.02229	6.76867	6.37317	6.91711
ENSDARG00000034982	zcchc8	Turquoise (M1)	8.95113	8.92204	8.76586	8.97416	8.92187	9.38004	9.63408	9.24653	9.19756	9.67789	8.71827	8.92761	8.87238	8.77996	9.08342	8.86015	9.00105	9.00477
ENSDARG00000034988	asb4	Turquoise (M1)	6.65696	6.90083	6.98453	6.50569	6.72848	8.78299	8.3132	8.75896	7.76581	8.17385	6.5653	7.5443	7.57978	7.24533	6.99358	7.21947	7.18725	7.38511
ENSDARG00000035043	pfdn5	Turquoise (M1)	9.09687	8.8999	8.93013	9.31794	9.08371	10.0236	10.1198	9.53607	9.69184	10.1304	9.55195	9.17689	9.20428	9.33743	9.31171	8.9091	8.81077	9.0207
ENSDARG00000035054	pdcd10a	Turquoise (M1)	9.93285	9.83146	9.84969	9.66501	9.84284	10.5271	10.5478	10.3044	10.4315	10.7354	9.66862	9.78964	9.76378	9.83632	9.62347	9.57689	9.70184	9.51248
ENSDARG00000035066	ubtf	Turquoise (M1)	11.9703	11.9513	12.0574	12.0982	12.0392	11.3768	11.3294	11.6341	11.4346	11.0552	11.5391	11.7648	11.7956	11.9913	11.8866	11.7891	11.7926	11.8736
ENSDARG00000035101	dicp2.1	Turquoise (M1)	4.16044	4.16044	4.16044	4.16044	4.16044	5.2179	5.27481	5.01838	4.96047	4.90352	4.79455	4.16044	4.49681	4.16044	4.54163	4.16044	4.16044	4.16044
ENSDARG00000035129	zgc:101858	Turquoise (M1)	7.22145	7.00121	7.15136	7.29419	7.18182	8.39696	8.47527	7.97843	8.19593	8.99003	7.96294	7.41116	7.06564	6.82359	6.88816	6.93799	7.09183	7.0622
ENSDARG00000035136	selenow1	Turquoise (M1)	9.26665	8.88065	9.02038	9.19659	9.13963	10.2165	10.4195	9.94175	9.81898	10.5593	9.69178	9.79382	9.29012	9.41521	9.56963	9.21448	9.29631	9.52816
ENSDARG00000035146	polr2j	Turquoise (M1)	7.86278	7.61777	7.29152	7.74771	7.65958	8.40088	8.4375	8.11601	8.14873	8.8391	7.80677	7.80059	7.43932	7.71017	7.64325	7.5384	7.60913	7.51792
ENSDARG00000035148	orai2	Turquoise (M1)	8.32129	8.88709	9.04925	8.50735	8.67715	7.46279	7.64589	7.65566	8.28154	7.10034	8.24027	8.0879	8.83579	8.40389	8.56598	8.31057	8.37304	8.27832
ENSDARG00000035152	ap2b1	Turquoise (M1)	13.0556	12.9854	13.1291	13.086	13.092	12.2301	12.3509	12.6128	12.742	12.3132	13.11	12.869	13.0025	12.9097	12.9906	12.9491	13.0322	12.9746
ENSDARG00000035161	pkdcca	Turquoise (M1)	9.32401	9.47967	9.71869	9.19954	9.43605	8.20428	8.7359	8.6627	8.78228	7.83513	9.05981	9.05182	9.32131	9.2779	9.30026	9.47752	9.4807	9.59774
ENSDARG00000035167	mrpl48	Turquoise (M1)	7.12821	7.31428	7.4747	7.62093	7.39269	8.55281	8.83597	8.18246	8.14393	8.91073	7.64416	7.57735	7.21766	7.44509	7.43714	7.04648	7.43124	7.36507
ENSDARG00000035184	tmem150ab	Turquoise (M1)	9.78594	9.84144	9.92236	9.86342	9.80513	7.91181	8.06028	8.2281	8.60516	7.59381	9.21289	9.6595	9.68035	9.82096	9.71689	9.76453	9.7624	9.58708
ENSDARG00000035193	fam81b	Turquoise (M1)	5.56721	5.93284	5.80118	5.46137	5.66978	5.01066	4.64522	5.01838	4.89229	4.82651	5.19798	5.58372	5.46417	5.53213	5.53796	5.41341	5.8235	5.56143
ENSDARG00000035198	gcnt4a	Turquoise (M1)	5.41727	5.34046	4.73353	5.05986	5.16471	6.96018	7.61598	6.1555	6.08131	6.32694	6.08571	5.72422	5.20368	5.24767	5.15227	5.24015	4.75298	5.33551
ENSDARG00000035257	akr1a1a	Turquoise (M1)	5.10153	4.93424	4.96576	5.50725	5.16471	5.6561	6.10486	5.93652	5.81822	6.69322	4.79455	5.09188	5.1522	5.24767	5.27911	5.31825	4.75298	4.88126
ENSDARG00000035264	riok2	Turquoise (M1)	8.28517	8.21469	8.25895	8.56787	8.35239	9.11344	9.42741	8.95859	9.05677	9.34048	8.72428	8.67221	8.20658	8.37043	8.48214	8.36005	8.52091	8.58342
ENSDARG00000035273	tmtc2b	Turquoise (M1)	9.15128	9.24408	9.32505	9.06084	9.154	7.84422	8.19232	8.32368	8.37467	7.5188	8.71525	8.70821	8.9543	9.01161	9.23255	9.28264	9.46412	9.12164
ENSDARG00000035282	emc6	Turquoise (M1)	8.40218	8.55182	8.61944	8.61716	8.58253	9.41715	9.49626	9.08274	9.31731	9.8054	9.06455	8.67221	8.49599	8.3956	8.45652	8.34046	8.2329	8.42944
ENSDARG00000035285	ncor1	Turquoise (M1)	12.7007	12.8083	12.9266	12.8743	12.8256	12.0954	12.0631	12.5255	12.4169	11.913	12.6824	12.7913	12.5753	12.752	12.7873	12.7759	12.8595	12.8936
ENSDARG00000035325	srsf7a	Turquoise (M1)	10.2703	10.2588	10.2961	10.427	10.3413	10.76	10.9045	10.7034	10.7199	11.2179	10.3357	10.3903	10.3324	10.334	10.1523	10.1385	10.2362	10.1281
ENSDARG00000035326	nccrp1	Turquoise (M1)	7.65123	7.62556	7.25549	7.1781	7.45025	9.82578	10.02	9.39557	9.565	10.6913	9.15404	8.41324	7.92733	8.01713	7.31584	7.43989	7.45686	7.62262
ENSDARG00000035338	tppp2	Turquoise (M1)	8.94344	9.09344	8.89006	9.36847	9.10752	8.18624	7.4813	8.10136	8.37877	7.79131	8.52515	8.54524	8.57588	9.10849	8.70296	9.01157	8.57604	8.68697
ENSDARG00000035352	pafah1b2	Turquoise (M1)	9.30014	9.26649	9.41648	9.37108	9.40036	7.55056	7.75277	7.7529	8.02343	7.2004	8.97921	9.14881	9.22328	9.33959	9.41092	9.31179	9.31261	9.35058
ENSDARG00000035398	enc1	Turquoise (M1)	11.2012	11.4731	11.222	11.2864	11.3029	10.3283	10.6037	10.6601	11.0658	10.6553	11.3208	10.9249	11.298	11.2317	11.3684	11.3946	11.3222	11.4848
ENSDARG00000035427	surf6	Turquoise (M1)	5.46968	5.2927	5.02847	5.25359	5.22308	6.15928	5.70154	5.5415	5.84465	6.32694	5.5992	5.09188	5.57289	5.29372	5.15227	5.31825	5.27513	4.88126
ENSDARG00000035433	arpc5lb	Turquoise (M1)	7.62243	7.83452	7.82569	7.97174	7.8491	8.50998	8.56361	7.97843	8.25059	8.86938	7.80677	7.40379	7.57978	7.68304	7.51923	7.62238	7.82708	7.50884
ENSDARG00000035452	camkk1a	Turquoise (M1)	10.8977	10.8502	11.2162	11.3091	11.0601	9.30281	9.42313	10.0458	9.76853	9.06257	10.5341	10.767	10.8116	10.8929	10.9147	10.9298	10.8475	10.6703
ENSDARG00000035458	atp2a1l	Turquoise (M1)	4.16044	4.16044	5.37081	4.53257	4.67012	5.92184	5.45088	5.01838	5.7061	5.42126	4.4794	4.85994	4.16044	4.7379	4.16044	4.66491	4.50414	5.10688
ENSDARG00000035459	spns3	Turquoise (M1)	5.17407	5.47127	5.28546	5.74796	5.4257	7.2339	7.69677	6.81947	7.44313	7.56428	6.06551	5.8959	6.33313	5.94338	6.01631	5.50037	5.36712	5.78186
ENSDARG00000035468	slc25a25b	Turquoise (M1)	9.76866	9.58839	9.49294	9.70072	9.67182	7.66627	7.8198	7.84978	8.32463	7.51107	9.03344	9.14881	9.26284	9.26433	9.07335	9.00693	9.33102	8.89841
ENSDARG00000035471	si:dkey-220k22.1	Turquoise (M1)	10.075	10.0538	10.3156	10.372	10.2128	8.77398	8.67594	9.21749	9.22957	8.23107	8.89915	9.87908	10.0268	10.1372	9.89875	9.79086	10.1259	9.81414
ENSDARG00000035514	adam28	Turquoise (M1)	5.30345	4.85417	4.49276	4.53257	4.78307	8.67088	9.83103	7.97843	8.01292	8.5744	6.60627	6.18007	4.82872	5.24767	5.4422	5.12431	5.27513	5.28348
ENSDARG00000035533	tacr1a	Turquoise (M1)	9.39335	9.76484	9.8226	9.80671	9.62724	8.01779	7.54627	8.01539	8.82185	8.10408	9.41204	8.98006	8.81401	9.22517	9.34833	9.65609	9.29162	9.25149
ENSDARG00000035552	agtr2	Turquoise (M1)	6.75062	6.2442	6.64729	6.63733	6.56061	9.16948	9.279	8.2636	7.91463	8.86036	7.57218	6.89251	6.48894	6.41348	6.63065	6.813	6.96556	6.78589
ENSDARG00000035565	atp6v0a2b	Turquoise (M1)	9.09687	8.87417	8.72413	8.97072	8.9185	9.3721	9.96067	9.30504	9.565	9.57518	9.30192	9.13125	9.06114	9.07259	8.76268	8.83241	8.87494	8.93586
ENSDARG00000035569	cyp1d1	Turquoise (M1)	7.0283	7.06044	6.88105	7.03819	7.02549	6.13946	6.27608	6.2144	6.51577	6.69322	7.0006	7.03414	7.0763	7.08745	7.32731	7.36856	7.23758	7.62262
ENSDARG00000035573	zgc:86811	Turquoise (M1)	7.072	7.37116	6.88105	7.45212	7.2266	8.33284	8.81324	7.95687	8.21896	8.58904	7.81245	7.40379	7.30154	7.16862	7.13153	7.21947	7.49854	7.40486
ENSDARG00000035596	ISCU (1 of many)	Turquoise (M1)	9.56842	9.41429	9.4872	9.53603	9.52711	10.0976	10.1211	9.68217	9.79168	10.2616	9.46319	9.50115	9.58079	9.46548	9.50624	9.26071	9.36714	9.01116
ENSDARG00000035607	ankle2	Turquoise (M1)	9.8009	10.0821	10.0781	10.0767	10.0319	8.11646	8.46696	8.50503	8.75423	7.86563	9.98838	10.0405	10.0851	9.91366	10.0804	9.9795	10.2178	10.2746
ENSDARG00000035608	pgam5	Turquoise (M1)	9.96924	9.95152	9.59608	9.66713	9.83038	10.3668	10.6828	10.2112	10.6956	10.7655	10.1068	9.87513	10.0389	9.81166	9.89685	9.68832	9.8842	9.86616
ENSDARG00000035618	coq5	Turquoise (M1)	7.18224	7.29479	7.36935	7.59415	7.38286	7.7113	7.68242	7.56565	7.62752	7.96471	7.59217	7.35876	7.27413	7.32691	7.51923	7.29342	7.26693	7.42435
ENSDARG00000035625	snrnp27	Turquoise (M1)	8.93571	9.03661	9.075	8.77942	8.99392	9.3899	9.53048	9.15051	9.32368	9.93832	8.70313	8.6415	8.89626	8.88722	8.57077	8.64178	8.68034	8.46718
ENSDARG00000035630	ypel1	Turquoise (M1)	9.68359	9.98191	10.174	10.1114	9.97968	8.50271	8.76666	8.99065	9.06694	7.8955	9.95687	9.71356	9.46787	9.79603	10.2373	10.3228	10.118	10.0788
ENSDARG00000035631	sdf2l1	Turquoise (M1)	8.29731	8.55182	8.81255	8.61274	8.60782	9.89386	10.3056	9.32612	9.52871	9.66588	8.93845	8.59418	8.59426	8.56779	8.7585	8.73277	8.61792	8.66279
ENSDARG00000035655	rad21b	Turquoise (M1)	11.4416	11.7479	11.8462	11.8265	11.7528	9.9812	9.65613	10.2202	10.2294	9.42236	11.1175	11.137	11.4336	11.5461	11.481	11.4797	11.4958	11.5064
ENSDARG00000035660	si:ch211-193k19.1	Turquoise (M1)	10.6711	10.5742	10.679	10.5758	10.6332	9.57412	9.02587	9.68707	9.67035	9.0678	10.4213	10.5441	10.6117	10.5892	10.591	10.7067	10.5941	10.7257
ENSDARG00000035676	ptp4a2b	Turquoise (M1)	11.8502	11.7044	11.9586	11.6963	11.8295	12.0821	12.67	12.1828	12.6737	12.7625	11.9987	11.3646	11.6308	11.4928	11.4651	11.4026	11.1741	11.3178
ENSDARG00000035677	bmp8a	Turquoise (M1)	5.17407	5.2927	5.48649	5.46137	5.3297	6.48755	6.42729	6.00636	6.14432	7.13112	5.32449	4.98497	5.25234	5.4587	5.27911	5.61871	5.32222	5.33551
ENSDARG00000035678	zgc:91910	Turquoise (M1)	9.37632	9.13463	9.0362	9.19069	9.2128	10.2482	10.5875	10.0188	10.2417	10.7574	9.84976	9.56299	9.33448	9.4193	9.28871	9.29157	9.2292	9.33792
ENSDARG00000035682	FP102018.1	Turquoise (M1)	8.54129	7.8278	8.08688	8.07824	8.13153	9.15336	10.1105	9.01163	10.2717	10.5198	9.60008	8.44917	8.3521	8.02792	8.29815	8.4196	8.1625	8.51751
ENSDARG00000035699	srp19	Turquoise (M1)	7.53234	7.46983	7.59443	7.58511	7.58466	8.26571	7.80665	8.10136	8.2326	8.41092	7.53821	7.5443	7.53449	7.54662	7.45811	7.69004	7.547	7.71224
ENSDARG00000035700	zgc:101664	Turquoise (M1)	6.71393	7.03705	7.09112	6.9268	6.97363	5.82265	5.87939	5.93652	6.18464	5.60232	7.36275	7.15386	6.95421	7.71017	7.32731	6.63465	7.02438	6.81615
ENSDARG00000035763	stx18	Turquoise (M1)	6.78635	6.76412	6.928	6.85233	6.87791	7.36921	7.48959	7.2006	7.24011	7.75915	6.806	6.64831	6.53706	6.94454	6.53269	6.82025	6.94132	6.64075
ENSDARG00000035765	CU633984.1	Turquoise (M1)	8.95113	9.21877	9.02567	8.88923	8.96162	6.25401	6.31555	6.58025	6.92499	5.89451	8.14021	8.0225	8.36502	8.67778	8.69423	9.28903	8.68034	9.06746
ENSDARG00000035781	ctdnep1b	Turquoise (M1)	8.29731	7.99292	8.30329	8.10996	8.17738	8.53867	8.78012	8.54159	8.89501	9.12662	8.21911	8.41324	8.38629	8.15142	8.19647	8.13683	8.31399	8.17936
ENSDARG00000035821	si:ch211-173p18.3	Turquoise (M1)	11.6907	11.6888	11.7672	11.7977	11.741	11.0092	11.0336	11.2202	11.1924	10.5179	11.3852	11.6674	11.5953	11.5646	11.7988	11.7739	11.8484	11.8727
ENSDARG00000035823	zmym4	Turquoise (M1)	10.3768	10.2822	10.3102	10.2312	10.3121	9.21457	9.51447	9.84433	9.64515	9.36617	9.93375	10.2703	10.2235	10.211	10.3787	10.3302	10.448	10.4494
ENSDARG00000035832	pyyb	Turquoise (M1)	8.71406	8.98046	8.78472	8.94289	8.90837	11.1608	10.6027	9.50129	10.7921	10.9381	10.212	8.39125	8.82027	8.83306	8.10695	8.42425	8.34154	8.30984
ENSDARG00000035860	rps28	Turquoise (M1)	9.53813	9.43641	9.1078	9.39693	9.42188	11.2565	11.3081	10.7202	10.7159	11.7523	10.722	10.2337	9.69912	9.66967	9.52111	9.59659	9.44524	9.42186
ENSDARG00000035869	azin1b	Turquoise (M1)	12.7869	12.7171	12.8173	12.8532	12.8181	12.2747	12.4449	12.2469	12.7671	12.2215	12.6609	12.5278	12.6173	12.6988	12.7107	12.5837	12.6084	12.684
ENSDARG00000035895	fndc5b	Turquoise (M1)	12.5023	12.375	12.4278	12.6326	12.4472	10.2098	10.7458	10.5782	10.6816	9.94827	11.2953	11.7964	12.0225	11.9646	12.2235	11.7496	12.0739	11.9653
ENSDARG00000035914	tmem167a	Turquoise (M1)	8.35652	8.24014	8.13679	8.33047	8.28598	9.47757	9.64881	9.24874	9.1906	9.95534	8.3992	8.26786	8.34777	8.10635	8.05316	8.03983	8.01608	7.96482
ENSDARG00000035949	tmem106bb	Turquoise (M1)	10.9919	11.1307	11.187	11.1055	11.1132	9.41329	9.55023	9.74142	9.89933	8.81441	10.523	10.8979	10.8983	10.8951	10.8267	10.8769	10.9838	10.6983
ENSDARG00000035952	cdr2a	Turquoise (M1)	7.27206	7.38962	8.03517	7.11624	7.46892	6.07807	5.82305	6.32469	6.80589	6.04055	7.48924	7.25595	7.43932	7.29124	7.32731	7.5977	7.5784	7.36507
ENSDARG00000035954	tdp2b	Turquoise (M1)	6.75062	6.86123	6.83245	6.85233	6.83477	7.33658	7.41319	7.34148	7.09649	7.35567	7.06946	6.82707	6.65753	7.05575	7.13153	6.63465	6.82662	6.70718
ENSDARG00000035957	gmnn	Turquoise (M1)	7.82964	7.79373	8.00859	7.44212	7.7688	8.67735	8.89283	8.49387	8.18194	8.98451	7.53821	7.96893	7.43932	7.46119	7.57783	8.02761	7.99305	7.34474
ENSDARG00000035985	fam210aa	Turquoise (M1)	9.05111	8.81793	8.83685	8.81056	8.91176	10.0312	9.80332	9.47887	9.38993	9.95816	9.16291	9.00197	8.9486	8.79263	8.85178	8.72525	8.68751	8.55742
ENSDARG00000035986	ptpn2b	Turquoise (M1)	9.02948	8.92517	8.95531	9.0511	9.01296	9.39382	9.23816	9.35718	9.24084	9.8007	8.85875	9.14881	9.18018	8.89605	9.0044	8.86358	8.93938	8.87756
ENSDARG00000035987	psmg2	Turquoise (M1)	7.95015	7.86764	8.01928	7.92966	7.94516	9.13236	8.96532	9.16228	8.78844	9.45265	8.28983	8.21871	8.20658	7.91034	7.9391	7.76204	7.67592	7.95153
ENSDARG00000036028	arrdc3b	Turquoise (M1)	9.78379	9.42096	10.222	9.25148	9.67779	10.6819	11.5051	11.1261	10.707	11.5641	10.31	9.18967	10.0799	9.31127	9.47091	9.97634	9.89352	8.99512
ENSDARG00000036031	sept5b	Turquoise (M1)	11.6388	11.5986	11.7022	11.4051	11.6191	9.26902	9.18353	9.80884	9.88935	8.59993	10.2056	11.3962	11.323	11.4909	11.1101	11.61	11.8579	11.8471
ENSDARG00000036041	f2	Turquoise (M1)	4.93326	4.5098	4.96576	4.89868	4.87758	5.56261	5.32189	5.07577	5.18491	5.0944	4.79455	4.85994	4.82872	4.82578	4.81693	4.77675	4.84308	4.88126
ENSDARG00000036045	penkb	Turquoise (M1)	9.711	10.2489	10.4227	10.3837	10.256	11.4516	11.4541	10.2146	11.6158	11.6371	10.8599	10.1793	9.90129	9.88588	10.2552	9.90498	10.0447	9.5828
ENSDARG00000036060	exosc6	Turquoise (M1)	6.8718	7.18252	7.34388	6.9268	7.12374	7.94444	7.87755	7.79001	7.88608	8.42324	7.34709	7.32792	7.21766	7.05575	6.93433	7.10656	7.00115	7.12346
ENSDARG00000036061	ogfod1	Turquoise (M1)	7.77842	7.84786	7.89124	7.75578	7.83483	8.43181	8.29923	8.32368	8.56264	8.34339	8.2776	7.86073	7.43932	7.57645	7.72318	7.70551	7.95184	7.83328
ENSDARG00000036069	ddx39b	Turquoise (M1)	9.57341	9.39408	9.45031	9.4645	9.49814	10.0574	10.2451	9.65411	9.90924	10.3819	9.35319	9.46307	9.46787	9.18732	9.52111	9.31304	9.39145	9.55683
ENSDARG00000036076	heatr3	Turquoise (M1)	8.45188	8.40668	8.47974	8.1952	8.39178	9.06008	9.78343	9.2421	9.04397	9.44664	8.65359	8.6446	8.49599	8.23287	8.49226	8.23033	8.35513	8.51751
ENSDARG00000036092	sdhaf3	Turquoise (M1)	7.62243	7.52921	7.49793	7.46204	7.54126	8.0827	8.09849	7.73398	7.84513	8.51046	7.60535	7.38894	7.53449	7.56905	7.3833	7.56836	7.47368	7.46252
ENSDARG00000036105	si:dkeyp-92c9.2	Turquoise (M1)	8.37953	8.40218	8.27685	8.27005	8.31189	6.03541	6.44503	6.30695	6.84271	6.01739	7.67571	7.85536	7.74112	7.76291	8.28072	8.29284	8.21314	7.78909
ENSDARG00000036136	tipin	Turquoise (M1)	7.15549	7.11726	7.09112	7.3163	7.18182	7.71762	7.6084	7.82021	7.73408	8.24964	7.5519	7.1361	7.22723	7.30918	7.23283	7.13565	7.01282	7.1354
ENSDARG00000036139	lctla	Turquoise (M1)	5.17407	4.93424	5.19157	4.89868	5.0344	6.67289	5.98472	6.19507	6.53109	6.76119	5.2421	5.45665	5.38481	5.1992	4.91637	4.98981	4.75298	5.2284
ENSDARG00000036147	ano5b	Turquoise (M1)	11.3832	10.9657	11.2243	10.5926	11.0647	10.3385	10.7164	10.7376	10.5275	10.012	10.8896	10.7952	11.2328	10.9757	11.2183	11.3077	11.3934	11.4269
ENSDARG00000036156	fnbp1a	Turquoise (M1)	11.1107	11.2105	11.174	11.1457	11.1308	8.67412	8.79014	9.16462	9.46675	8.55961	10.383	10.8152	11.0247	11.1887	11.0405	11.1247	11.306	11.266
ENSDARG00000036162	hnrnpa0b	Turquoise (M1)	11.3415	11.4242	11.4376	11.0578	11.3647	11.8813	11.9547	11.6945	11.8525	12.1988	11.6393	11.4839	11.431	11.3434	11.2859	11.3946	11.2926	11.4494
ENSDARG00000036175	pcdh1b	Turquoise (M1)	13.216	13.2902	13.3098	13.2741	13.2446	11.8851	11.8004	12.0314	12.3184	11.4397	12.5738	12.6124	12.9845	13.0282	13.0301	13.2931	13.2112	13.2048
ENSDARG00000036179	myo1ea	Turquoise (M1)	8.88843	9.0653	8.93013	9.24295	9.03486	10.1565	11.0961	9.85597	10.3795	10.3436	10.0082	8.82756	8.7662	8.85134	8.58974	8.70244	8.5566	8.6005
ENSDARG00000036190	txnl4a	Turquoise (M1)	8.75419	8.75235	8.56954	8.59048	8.70476	9.4344	9.44862	9.16228	9.41002	9.97216	8.77148	8.40595	8.76296	8.54923	8.58974	8.4968	8.53688	8.35587
ENSDARG00000036281	FO704915.1	Turquoise (M1)	9.93672	10.2173	10.1752	10.1223	10.1135	9.219	9.28373	9.55405	9.61432	8.74749	9.91024	10.1415	10.0389	10.2274	9.99068	9.97713	10.1865	9.9926
ENSDARG00000036282	rnaset2	Turquoise (M1)	8.39655	8.28485	8.44456	8.39874	8.39663	9.37607	9.39718	9.01682	8.90355	8.84216	8.90445	8.72588	8.36073	8.51138	8.46168	8.20617	8.49662	8.34577
ENSDARG00000036291	nucb2b	Turquoise (M1)	8.05414	8.21982	8.00859	8.23599	8.1489	8.64144	9.49829	8.43677	9.28286	9.15638	8.50433	7.94391	7.83105	7.91034	7.29262	7.73217	7.38749	7.6722
ENSDARG00000036293	gnb1l	Turquoise (M1)	6.9678	7.343	7.12157	7.21395	7.15888	6.32508	6.78552	6.32469	6.75519	6.10758	6.94924	7.09988	7.13864	6.89742	7.245	7.16978	7.4226	7.11142
ENSDARG00000036329	ndufa1	Turquoise (M1)	8.39655	8.55588	8.21319	8.50735	8.45822	9.46083	9.61357	9.15523	9.11671	10.0821	8.58255	8.23116	8.3989	8.65367	8.34361	8.21427	7.9814	7.84052
ENSDARG00000036337	cers3b	Turquoise (M1)	5.10153	4.76265	4.73353	4.80149	4.87758	6.76309	6.82598	5.98352	6.38637	7.15127	5.19798	4.7873	4.74046	4.7379	5.39077	4.8253	4.75298	4.78628
ENSDARG00000036359	riox2	Turquoise (M1)	6.71393	7.255	6.928	6.96963	6.9998	7.93364	8.10387	7.67565	7.73408	8.47935	7.43852	6.93448	7.21766	7.17844	7.13153	7.4023	7.05852	7.12346
ENSDARG00000036375	cyfip2	Turquoise (M1)	13.5185	13.4664	13.5902	13.5481	13.5551	12.5461	12.7476	12.8532	12.9218	12.3356	12.959	13.2075	13.3978	13.2714	13.4938	13.3902	13.5781	13.5469
ENSDARG00000036394	pop7	Turquoise (M1)	8.35652	8.82466	8.83383	8.4688	8.64901	9.15567	9.43381	8.94774	9.16481	9.59704	8.46894	8.41324	8.56473	8.7182	8.50231	8.58678	8.40821	8.52648
ENSDARG00000036424	pcdh20	Turquoise (M1)	8.38523	8.41564	8.39218	7.97174	8.28598	7.01318	7.21698	7.48475	8.19128	7.17113	8.08976	7.69636	8.24437	8.07028	8.10033	8.4968	7.88458	7.6803
ENSDARG00000036442	atp11c	Turquoise (M1)	10.613	10.7706	10.7582	10.7301	10.7129	9.88691	9.90653	10.0111	10.1939	9.28992	11.0582	10.6199	10.6438	10.5864	10.3855	10.5755	10.4321	10.3672
ENSDARG00000036445	serpinh2	Turquoise (M1)	6.25245	6.01188	5.88089	6.4242	6.14378	7.69218	8.30856	7.22811	7.13625	7.37285	7.13507	6.72265	6.25746	6.08376	6.40479	6.42912	6.03468	6.15277
ENSDARG00000036446	PRKAR2B	Turquoise (M1)	10.12	10.3004	10.541	10.1635	10.3261	8.33693	8.64315	8.9147	9.11181	8.09383	9.59681	9.79939	10.0642	10.1836	10.0084	10.0874	10.0335	10.1543
ENSDARG00000036473	snapc2	Turquoise (M1)	7.28444	7.12835	7.22785	7.11624	7.19315	7.77931	8.15656	7.96769	7.73408	7.95907	7.37051	7.53086	7.0763	7.3617	7.49915	7.2031	7.29568	6.98495
ENSDARG00000036481	tcn2	Turquoise (M1)	7.42502	7.1611	7.11149	7.12883	7.2266	6.71228	6.81262	6.32469	6.70255	6.15036	7.32327	7.10902	7.25556	7.33568	7.23283	7.19761	7.11361	6.94464
ENSDARG00000036482	hexim1	Turquoise (M1)	9.87748	9.91417	10.1083	9.85038	9.97806	10.1	10.0755	10.0797	10.3096	10.365	9.9946	9.88039	9.98433	10.0048	9.99246	9.97713	9.88732	9.97147
ENSDARG00000036483	c1ql3b	Turquoise (M1)	10.3596	10.5275	10.5693	10.9537	10.6525	12.0684	12.824	11.7162	11.8206	11.9353	10.5221	10.0511	10.791	10.7934	10.5792	9.75533	10.7155	9.87144
ENSDARG00000036542	pknox1.2	Turquoise (M1)	8.88843	9.0308	9.02038	9.06407	9.00347	8.00239	8.19736	8.30677	8.58051	7.82275	8.99917	8.89676	8.8265	9.10849	8.95773	8.79697	8.75046	8.90872
ENSDARG00000036546	pdxkb	Turquoise (M1)	10.1268	10.1154	10.255	10.2568	10.1781	8.20428	8.56361	8.5452	8.99955	8.06787	10.0601	9.8187	10.1247	10.0008	10.1053	9.99208	9.9362	9.91297
ENSDARG00000036584	st8sia5	Turquoise (M1)	10.8937	10.8908	11.1163	11.03	11.001	8.86735	9.06212	9.17163	9.59865	8.45956	10.2737	10.2501	10.7176	10.5042	10.6864	10.944	10.697	10.9266
ENSDARG00000036592	setd4	Turquoise (M1)	7.57309	7.38962	7.26458	7.48169	7.43132	8.19979	7.96889	7.7148	7.67513	8.17871	7.5519	7.5443	7.53449	7.4288	7.37228	7.68225	7.67592	7.42435
ENSDARG00000036619	mgat3b	Turquoise (M1)	10.0715	10.5959	10.5083	10.1316	10.3413	8.04812	8.04358	8.53435	8.74793	7.60835	10.0743	10.0661	10.4358	10.4109	10.2146	10.4318	10.2337	10.1629
ENSDARG00000036626	sema6ba	Turquoise (M1)	11.1537	11.2952	11.296	11.0961	11.1701	8.67735	8.96532	9.12667	9.20907	8.22638	10.6259	10.9644	11.1372	11.1905	11.193	11.2595	11.4423	11.3016
ENSDARG00000036675	hnrnpa1b	Turquoise (M1)	10.8645	10.9279	10.8504	10.8349	10.9093	11.3109	11.3688	11.035	11.3363	11.7112	11.1164	11.0918	10.9115	11.016	11.0787	11.0664	11.0725	11.0871
ENSDARG00000036678	trmt10a	Turquoise (M1)	7.30887	7.22439	7.01738	7.12883	7.19315	8.05808	8.11988	7.80216	8.06474	8.36484	7.59217	7.28839	7.31055	7.02331	7.02229	7.02794	7.22766	7.0622
ENSDARG00000036684	ndufa7	Turquoise (M1)	7.70714	7.64866	7.63684	7.80322	7.73075	8.53512	8.79014	8.40535	8.35403	8.99827	7.74869	7.51046	7.53449	7.73018	7.59683	7.32898	7.33313	7.24946
ENSDARG00000036685	ccnt2a	Turquoise (M1)	10.4813	10.5347	10.471	10.5169	10.5281	11.1791	11.3843	10.9418	10.9798	11.6485	10.197	10.3	10.3787	10.4702	10.4824	10.3271	10.4117	10.3534
ENSDARG00000036695	calcoco1a	Turquoise (M1)	10.3581	10.4273	10.4874	10.3337	10.45	9.95754	9.90347	9.85162	10.119	9.05994	10.2226	10.4259	10.1913	10.3242	10.4556	10.6592	10.7398	10.5037
ENSDARG00000036721	tomm40l	Turquoise (M1)	8.63027	8.6423	8.78472	8.60832	8.69299	9.31735	9.701	9.12427	9.27411	9.78809	8.79166	8.45625	8.51927	8.61137	8.70731	8.64776	8.52091	8.58342
ENSDARG00000036728	si:dkey-211g8.1	Turquoise (M1)	4.93326	5.00613	4.73353	4.89868	4.87758	5.17065	5.40971	5.5415	5.54829	5.94515	4.79455	4.70437	4.90597	4.7379	4.81693	4.98981	4.75298	5.2284
ENSDARG00000036764	hax1	Turquoise (M1)	7.6321	7.74462	7.57274	7.92966	7.7537	8.10209	8.54795	8.13051	7.81514	8.45956	7.74869	8.00325	7.62367	7.59114	7.7573	7.5384	7.5784	7.55369
ENSDARG00000036775	dtd2	Turquoise (M1)	6.47005	6.61219	6.4327	6.4242	6.50588	7.57168	7.27589	7.17254	6.86673	7.32065	6.6719	6.41222	6.62841	6.16929	6.64942	6.3799	6.79977	6.37841
ENSDARG00000036784	commd7	Turquoise (M1)	7.89518	7.92538	7.95391	8.03922	7.97146	9.12293	9.01453	8.62913	8.65321	9.14158	7.96294	8.23939	7.74112	7.86287	8.10033	7.59355	7.91555	7.86909
ENSDARG00000036793	ttll5	Turquoise (M1)	8.69585	8.94693	9.05702	8.92166	8.87406	7.72391	8.03234	8.31101	8.54091	7.90139	8.65043	8.84113	8.77589	8.94226	8.86351	8.80235	8.82383	9.04271
ENSDARG00000036811	ifrd2	Turquoise (M1)	9.50979	9.40085	9.4205	9.50547	9.48002	10.1783	10.146	9.79228	9.99684	10.0834	9.7952	9.60014	9.47779	9.32223	9.2829	9.42282	9.45576	9.50118
ENSDARG00000036818	hyal3	Turquoise (M1)	6.171	6.08618	6.02604	6.69004	6.23849	5.6856	5.95923	6.13525	5.73517	5.56848	6.10558	6.18007	6.23784	6.28771	6.55286	6.26466	6.49744	5.93812
ENSDARG00000036826	ankrd52a	Turquoise (M1)	10.5587	10.594	10.7374	10.6082	10.5927	8.12596	8.34983	8.53798	8.71919	7.77853	10.4722	10.464	10.5799	10.6241	10.4177	10.5364	10.5769	10.6774
ENSDARG00000036868	tbpl1	Turquoise (M1)	8.11033	7.85448	7.89124	8.02598	7.98443	8.67735	8.40742	8.41721	8.27716	8.40679	7.85159	7.78374	7.97876	8.08585	7.86289	7.8376	8.06104	7.92458
ENSDARG00000036893	f13a1b	Turquoise (M1)	7.14191	6.83418	7.87954	6.83694	7.17039	10.3638	11.088	9.94856	10.4779	10.6921	9.02617	7.35876	7.62367	8.48427	6.55286	6.64291	6.94132	7.12346
ENSDARG00000036911	scamp1	Turquoise (M1)	11.2283	11.3157	11.3856	11.2372	11.3157	9.53379	9.65977	9.85597	10.0681	9.01732	10.6291	10.634	11.2074	11.1075	11.1313	11.1769	11.2278	11.2267
ENSDARG00000036913	st6galnac6	Turquoise (M1)	9.07241	9.47326	9.54175	9.41728	9.38583	6.97095	6.98873	7.23717	7.45098	6.49865	8.95131	8.77762	9.26971	9.32659	9.18037	9.2555	9.19192	9.19647
ENSDARG00000036924	tatdn1	Turquoise (M1)	7.36814	7.46983	7.62285	7.3701	7.46892	8.17713	7.96298	8.10136	7.70818	8.3985	7.33126	7.46875	7.54214	7.17844	7.34997	7.18098	7.33313	7.36507
ENSDARG00000036944	ensaa	Turquoise (M1)	8.73203	8.98347	9.01772	9.27676	9.02864	7.89521	8.01531	8.4713	8.33309	7.62988	8.30195	8.52182	8.8265	9.1286	8.91328	8.6257	8.75729	8.49028
ENSDARG00000036952	zgc:198371	Turquoise (M1)	9.00383	9.28124	9.23886	8.96034	9.13385	7.7113	7.66792	7.90715	8.07992	7.16123	8.46535	8.80557	9.00185	8.84527	9.18661	9.23844	9.28691	9.35058
ENSDARG00000036965	rnf24	Turquoise (M1)	10.2123	10.0408	9.9181	10.0411	10.0611	8.71866	8.81324	8.90912	9.21594	8.38597	9.66238	9.46307	9.75238	9.63495	9.73402	9.65411	9.74536	9.68624
ENSDARG00000036985	plxnb2b	Turquoise (M1)	12.431	12.0982	12.2899	11.9903	12.1833	9.64169	9.75987	10.2536	10.3683	9.47249	11.6161	11.9525	11.9848	12.195	11.8185	12.2304	12.3052	12.4555
ENSDARG00000036995	lsm6	Turquoise (M1)	8.88843	8.77338	8.8637	9.02148	8.9185	9.88552	9.89422	9.56473	9.59339	10.385	9.14288	8.74333	8.91976	8.7182	8.65424	8.6557	8.68393	8.6005
ENSDARG00000036998	arf3b	Turquoise (M1)	11.5543	11.5813	11.7628	11.7767	11.6774	8.3891	8.70447	8.88658	9.16008	8.24964	11.1608	11.0861	11.7036	11.4605	11.5755	11.4752	11.5434	11.6798
ENSDARG00000036999	DISP3	Turquoise (M1)	10.5712	10.8168	10.7865	10.8302	10.7207	8.98917	9.34157	9.37144	9.61605	8.63914	10.562	10.5358	10.3766	10.6329	10.8844	10.8142	10.6674	10.9164
ENSDARG00000037000	fkbp11	Turquoise (M1)	5.69884	5.55008	5.44937	5.94687	5.70566	6.83592	7.52226	6.32469	6.53109	7.05821	6.44952	5.64206	6.68605	6.10569	5.58279	5.88424	5.70197	5.90845
ENSDARG00000037009	banf1	Turquoise (M1)	9.4541	9.38955	9.26816	9.33409	9.39069	10.7355	10.5702	10.2841	10.3455	11.0022	9.94278	9.86189	9.95197	9.53304	9.306	9.33172	9.33102	9.06439
ENSDARG00000037059	slc44a2	Turquoise (M1)	12.1209	12.1587	12.0821	12.3491	12.1889	11.4652	11.3046	11.4053	11.4203	10.6387	12.1057	11.7605	12.1019	12.0412	11.9612	12.2276	12.1962	12.392
ENSDARG00000037060	kmt2d	Turquoise (M1)	12.909	12.9159	13.0274	13.0223	12.9482	11.6699	11.788	12.1227	12.0532	11.326	12.4199	12.841	12.7102	12.8872	12.9529	12.8251	12.9266	12.9707
ENSDARG00000037066	lgals8a	Turquoise (M1)	8.23555	8.17828	7.97604	8.14099	8.12569	6.99222	6.91599	7.19131	7.23098	6.51466	8.24865	8.18924	7.94468	8.00626	8.08701	8.06395	8.13649	7.98453
ENSDARG00000037069	zdhhc14	Turquoise (M1)	10.4585	10.6154	10.7622	10.6625	10.5969	8.89255	9.0894	9.03487	9.43377	8.40679	9.60171	10.0204	10.327	10.2297	10.2237	10.2901	10.2276	10.1251
ENSDARG00000037073	si:dkey-60a16.1	Turquoise (M1)	7.65123	8.01671	7.55071	7.9009	7.79115	8.46583	8.59443	8.35279	8.29893	8.79875	7.72478	7.84458	7.63085	7.8868	8.07357	7.7397	7.80739	7.87615
ENSDARG00000037097	slc7a2	Turquoise (M1)	9.02585	9.39634	5.19157	4.98364	6.5959	12.1161	13.0738	12.0133	12.1649	9.01462	8.65359	8.75485	8.37782	8.46855	8.43568	7.99973	5.56586	6.60627
ENSDARG00000037108	pfdn6	Turquoise (M1)	8.22923	8.1246	8.0246	8.10996	8.1489	9.65319	9.69214	9.17628	9.25868	9.94827	8.58255	8.22702	8.00656	8.07028	7.95386	7.87904	7.93985	7.81136
ENSDARG00000037116	cxcl12a	Turquoise (M1)	9.67201	9.4276	9.41648	9.17584	9.46628	8.84457	8.18219	8.96935	8.68988	9.01462	9.50215	9.32515	9.41722	9.40906	9.61656	9.70083	9.40455	9.63338
ENSDARG00000037122	TENM2	Turquoise (M1)	12.2132	12.1873	12.1649	11.7082	12.0792	10.9154	10.919	11.4023	11.6672	10.6972	11.4331	12.0618	12.1093	12.3158	12.1994	12.3755	12.4807	12.132
ENSDARG00000037142	zgc:153146	Turquoise (M1)	5.41727	5.00613	5.14064	5.25359	5.16471	6.09887	6.95284	6.67834	6.24285	6.95848	5.19798	4.92525	5.29857	5.24767	5.39077	5.15474	5.17307	4.88126
ENSDARG00000037229	denr	Turquoise (M1)	8.47876	8.66124	8.52159	8.80671	8.66114	9.45709	9.65795	9.36331	9.53787	9.9984	8.99172	8.44917	8.52312	8.63268	8.51229	8.22499	8.35513	8.30984
ENSDARG00000037245	trmo	Turquoise (M1)	7.41383	7.41687	7.37774	7.6472	7.46892	7.1231	7.21698	7.12447	7.19386	6.95848	7.2744	7.56422	7.50347	7.56905	7.74034	7.37828	7.71877	7.72795
ENSDARG00000037259	ndufb6	Turquoise (M1)	8.37953	8.47681	8.36734	8.56787	8.47665	9.28601	9.42313	9.06026	9.23409	9.78174	8.78592	8.6446	8.36502	8.47643	8.48214	8.30046	8.30468	8.20754
ENSDARG00000037260	toporsa	Turquoise (M1)	8.52075	8.23002	8.10705	8.38327	8.31701	8.52798	8.79014	8.38537	8.49642	8.94809	8.26113	8.34239	8.03921	8.34051	8.23921	8.11391	8.41254	8.08526
ENSDARG00000037276	map9	Turquoise (M1)	7.12821	7.343	7.19013	6.8826	7.14726	7.8671	7.71098	7.74662	7.41929	7.84129	7.09796	6.97521	7.0763	7.46917	7.1446	7.2031	7.02438	7.24946
ENSDARG00000037281	fgg	Turquoise (M1)	5.02199	4.85417	4.16044	4.80149	4.78307	5.17065	5.27481	4.95637	4.96047	5.60232	4.71069	4.7873	4.74046	4.7379	4.81693	4.98981	4.92193	4.52365
ENSDARG00000037320	fam131c	Turquoise (M1)	8.94729	8.61147	8.89006	8.49301	8.75843	7.67928	7.05785	7.65566	7.93707	7.41493	8.21055	8.5748	8.4763	8.69138	8.65424	8.72901	8.89365	8.68697
ENSDARG00000037350	rpl9	Turquoise (M1)	6.73239	6.84777	6.80748	7.03819	6.8493	7.7488	7.84576	7.63539	7.57826	8.30396	7.12589	6.87104	7.08689	7.00126	6.91911	6.86995	6.90414	6.99813
ENSDARG00000037353	frs2b	Turquoise (M1)	8.20365	8.37488	8.49127	8.22445	8.34739	8.8814	8.79014	8.72441	8.54091	9.03078	8.46176	8.63216	8.40725	8.59337	8.45652	8.56375	8.31862	8.61738
ENSDARG00000037361	kdelr2b	Turquoise (M1)	7.95015	8.10256	8.10204	8.37286	8.1489	9.64498	9.7428	9.22873	9.29371	10.0808	9.23199	8.7288	8.31708	8.3662	8.12661	8.11102	8.01608	8.37586
ENSDARG00000037373	ephb2a	Turquoise (M1)	10.281	10.0877	10.1083	10.2369	10.1739	7.87841	8.11988	7.95687	8.29893	7.46382	9.54179	9.49601	10.0642	9.76907	10.3275	10.2913	10.258	10.4946
ENSDARG00000037383	pax5	Turquoise (M1)	4.83168	5.00613	4.73353	5.05986	4.96023	4.61956	4.64522	4.16044	4.62625	4.49568	4.79455	4.70437	4.82872	5.03497	4.81693	4.95218	5.22554	4.88126
ENSDARG00000037392	med19a	Turquoise (M1)	8.3909	8.2946	8.37567	8.52624	8.41587	9.27754	9.50235	9.06278	9.16481	9.81476	8.66613	8.55186	8.38206	8.7015	8.33801	8.3231	8.30001	8.10338
ENSDARG00000037403	si:dkey-4p15.3	Turquoise (M1)	9.81149	9.81467	10.1894	9.88549	10.0005	8.69656	8.28983	8.42507	8.93441	9.13412	9.85113	10.0719	9.65259	9.79131	10.1539	10.0526	10.0585	9.70409
ENSDARG00000037405	zgc:112083	Turquoise (M1)	7.87095	8.00487	7.77605	8.03262	7.93183	8.61137	8.75307	8.76206	8.20519	8.5854	7.70045	7.95898	7.89794	8.08585	7.95386	7.85501	7.8783	8.01038
ENSDARG00000037408	tbc1d10c	Turquoise (M1)	5.69884	5.2927	5.41085	5.46137	5.47048	7.11346	8.2419	7.29895	7.8803	8.31722	6.60627	5.91852	5.79127	5.72662	5.85457	5.92798	5.8235	6.35753
ENSDARG00000037409	tmem144a	Turquoise (M1)	7.75211	7.88714	7.75698	7.56686	7.7537	8.66764	8.49174	8.46751	8.65321	8.0731	8.08509	7.85536	7.65219	7.73018	7.69703	7.69392	7.83359	7.72795
ENSDARG00000037415	dlgap1b	Turquoise (M1)	9.17445	9.35279	9.36733	9.17584	9.19625	7.79133	8.58295	8.55238	8.77609	7.99259	8.90445	8.71412	8.95145	9.37999	9.1615	9.48977	9.29631	9.15954
ENSDARG00000037425	s100a10a	Turquoise (M1)	5.02199	5.00613	5.19157	5.12942	5.10212	5.6856	6.29597	5.88763	6.16464	6.54611	4.93403	4.98497	4.74046	4.97182	4.81693	4.91247	4.92193	4.78628
ENSDARG00000037432	haus7	Turquoise (M1)	6.98318	6.90083	6.61866	6.35962	6.69653	7.90629	7.4813	7.70187	7.45879	8.14932	7.43852	6.99513	6.87051	6.75888	6.70421	6.68347	6.46311	6.70718
ENSDARG00000037473	cd79a	Turquoise (M1)	5.17407	5.00613	5.02847	5.46137	5.10212	5.76976	5.95923	6.23345	5.47814	6.15036	4.9944	4.92525	5.20368	5.37963	5.08118	5.15474	5.36712	5.33551
ENSDARG00000037484	tmem192	Turquoise (M1)	8.05414	8.14632	8.04042	8.10996	8.10804	8.90361	8.82951	8.85209	9.05422	9.09623	8.26113	8.18498	8.01752	7.86889	8.01145	7.86536	7.96374	7.88317
ENSDARG00000037487	march1	Turquoise (M1)	8.03248	7.97482	8.05088	7.94382	8.01002	6.94934	6.49685	7.11466	6.98089	6.60689	7.66317	7.86073	7.94468	8.05454	7.9091	7.85155	8.06657	7.69636
ENSDARG00000037496	gria4a	Turquoise (M1)	10.4148	10.8771	10.9031	10.6214	10.7032	11.7371	11.3034	11.2969	11.2154	12.235	10.6033	9.93197	10.1621	10.4839	10.3719	10.7392	10.2165	10.3306
ENSDARG00000037506	prps1b	Turquoise (M1)	9.01488	8.72741	8.67105	8.87088	8.83891	9.44956	8.94455	9.26412	9.36132	9.23752	8.99917	8.98006	8.8542	8.80519	8.93568	8.71579	8.88744	8.44371
ENSDARG00000037517	slc35c2	Turquoise (M1)	7.75211	7.31428	7.27362	8.27565	7.65145	8.5668	9.27425	8.80478	8.56264	8.78293	8.09443	7.52409	7.62367	7.42058	7.68821	7.6586	7.872	7.4997
ENSDARG00000037570	polr1d	Turquoise (M1)	6.61761	6.49466	6.51335	6.5253	6.57837	7.58558	7.66061	7.1439	7.39505	8.06787	6.6719	6.51452	6.45586	6.79807	6.88816	6.52238	6.05869	6.2247
ENSDARG00000037603	zgc:162144	Turquoise (M1)	4.83168	5.00613	4.82077	4.98364	4.96023	5.30563	4.99249	5.01838	5.27824	5.49745	4.93403	4.7873	5.03879	4.97182	4.81693	4.8253	4.99273	4.78628
ENSDARG00000037607	nol4lb	Turquoise (M1)	9.51239	9.8079	9.94765	9.7696	9.75328	7.50002	7.66061	8.04122	8.18194	7.2938	9.18921	9.48569	9.54727	9.49869	9.61656	9.61602	9.73676	9.59774
ENSDARG00000037618	ddit4	Turquoise (M1)	8.91226	9.39182	9.21126	9.84851	9.33884	10.3263	10.689	9.98346	10.5647	10.4772	9.21928	9.35947	9.0899	9.31127	9.51121	9.22917	9.32184	9.07968
ENSDARG00000037652	zgc:56409	Turquoise (M1)	7.65123	7.96873	8.19917	8.67754	8.13734	7.40896	7.52226	7.43074	7.92589	6.91174	8.17141	8.23116	8.30819	7.87489	8.68984	8.30046	8.09387	8.00396
ENSDARG00000037691	pcdh2ab2	Turquoise (M1)	7.0283	6.84777	7.1415	6.80563	6.80523	5.2628	5.45088	5.63844	5.76352	5.29493	6.21869	6.62259	6.89494	6.67694	6.88816	7.07083	6.95349	7.11142
ENSDARG00000037695	pcdh2aa1	Turquoise (M1)	6.25245	6.01188	6.00301	6.09086	6.09364	5.2628	5.27481	5.39675	5.54829	5.24884	6.00289	5.77589	6.17709	6.16929	6.53269	6.20869	6.61111	6.2247
ENSDARG00000037748	slc43a1b	Turquoise (M1)	6.11366	5.51141	5.97955	5.81804	5.87002	5.30563	4.99249	5.27263	5.44122	4.9727	5.47093	5.80089	5.20368	5.78466	5.70725	5.70845	5.98522	5.78186
ENSDARG00000037773	rybpa	Turquoise (M1)	9.55083	9.75783	9.64329	9.62402	9.66982	8.92819	8.78681	9.05269	9.39397	9.30991	9.39332	9.45251	9.61174	9.54805	9.74251	9.81672	9.66967	9.83049
ENSDARG00000037781	acss2	Turquoise (M1)	10.4733	10.4062	10.5214	10.4847	10.4901	10.1953	9.92178	10.3411	10.3528	10.2164	10.4046	10.4159	10.4808	10.3307	10.4913	10.4682	10.613	10.5722
ENSDARG00000037782	sox8b	Turquoise (M1)	6.14266	5.34046	6.4327	6.48578	6.09364	5.2179	4.7528	5.35711	5.5138	5.0944	6.08571	6.26782	7.43109	6.20998	7.13153	6.47656	6.90414	6.69087
ENSDARG00000037813	zgc:113278	Turquoise (M1)	8.66344	8.75588	8.7176	8.78727	8.69299	7.60619	7.6084	7.85562	7.89757	7.22908	8.66301	8.76912	8.60154	8.74453	8.82802	8.62974	8.78093	8.89149
ENSDARG00000037815	b4galt5	Turquoise (M1)	9.85104	9.95152	10.0691	9.98766	9.71893	8.28703	8.4586	8.42898	8.61212	8.00359	9.66081	9.42756	9.79108	9.71026	9.75305	9.75441	9.87953	9.9731
ENSDARG00000037835	polr3k	Turquoise (M1)	7.34473	7.15027	6.84476	6.94122	7.11183	8.14478	8.00959	7.72761	7.75952	8.40679	7.43852	7.14501	7.25556	7.15873	7.07798	7.07083	7.27658	7.26037
ENSDARG00000037837	ogfr	Turquoise (M1)	10.2155	10.5151	10.6857	10.6247	10.5236	9.13001	9.132	9.44266	9.62295	9.31432	10.4018	10.3253	10.0363	10.3798	10.5444	10.0984	10.5692	10.0984
ENSDARG00000037846	hm13	Turquoise (M1)	10.3112	10.2198	10.295	10.275	10.3031	11.3837	11.6448	10.9862	11.2498	11.6411	10.529	10.2842	10.2926	10.2978	10.1135	10.13	10.2103	10.0788
ENSDARG00000037855	taf11	Turquoise (M1)	8.37953	8.54776	8.42464	8.58148	8.50835	9.04767	8.80667	8.61204	8.68328	8.95375	8.38408	8.4738	8.51155	8.44465	8.51229	8.44503	8.49662	8.26766
ENSDARG00000037859	il11a	Turquoise (M1)	5.10153	4.76265	4.16044	4.80149	4.67012	9.89662	10.445	8.18246	8.3415	10.0574	6.46455	4.7873	5.20368	4.97182	4.16044	4.16044	4.84308	4.52365
ENSDARG00000037860	cox6b2	Turquoise (M1)	10.9125	10.628	10.739	10.7533	10.7866	11.8588	12.1336	11.5706	11.653	12.2773	11.0824	10.8849	10.8722	10.8451	10.6908	10.5223	10.4595	10.3796
ENSDARG00000037867	atp5mf	Turquoise (M1)	9.95594	9.84971	10.3413	10.6867	10.2305	11.3397	11.3248	10.9901	10.9663	11.7503	10.5048	9.90641	9.9619	10.3297	10.5792	9.59556	9.98203	9.71783
ENSDARG00000037871	wipi2	Turquoise (M1)	10.9056	10.8972	10.9745	11.085	10.9851	10.4937	10.3079	10.6543	10.5674	9.99977	10.6195	10.7275	10.6846	10.8314	10.8005	10.7029	10.833	10.649
ENSDARG00000037872	foxk1	Turquoise (M1)	10.4355	10.5327	10.5935	10.587	10.5456	9.26902	9.25029	9.49385	9.69512	8.72116	10.0241	10.2286	10.0954	10.3231	10.1915	10.3681	10.4203	10.3783
ENSDARG00000037873	cyp3c3	Turquoise (M1)	5.30345	5.55008	5.28546	5.50725	5.37886	7.82681	7.99229	7.13422	7.38687	9.04941	5.93693	5.34994	5.03879	5.66549	5.70725	5.77547	5.32222	5.67703
ENSDARG00000037884	rab30	Turquoise (M1)	11.1744	11.0676	11.0774	11.0674	11.0791	9.17405	9.26472	9.49012	9.90359	8.8902	10.298	10.7571	10.966	10.729	10.8699	10.9629	10.9358	10.9484
ENSDARG00000037916	cdk5r1a	Turquoise (M1)	10.0802	10.2312	10.4988	10.3013	10.2993	7.98681	8.00959	8.31947	8.65321	7.62988	9.38386	9.60333	9.83957	9.89471	9.90065	9.93216	9.97474	9.91297
ENSDARG00000037919	rbbp6	Turquoise (M1)	11.8786	11.7854	11.7501	11.923	11.8406	12.3371	12.3439	12.1628	11.8991	12.5921	11.6676	11.848	11.7546	11.6954	11.7902	11.7694	11.8432	11.8489
ENSDARG00000037930	rnf113a	Turquoise (M1)	7.08626	7.43474	7.1415	7.2021	7.24847	7.82095	7.59312	7.73398	7.47429	7.59381	7.37051	7.33569	6.95421	7.38723	6.97901	7.14712	7.27658	7.38511
ENSDARG00000037932	lin7b	Turquoise (M1)	5.02199	8.63848	8.32925	9.41222	7.39269	14.4289	14.7596	14.6369	8.50767	13.9673	8.47252	8.27188	5.25234	9.25063	9.2265	5.05989	8.24755	9.32516
ENSDARG00000037954	tnnt1	Turquoise (M1)	6.11366	6.59602	6.27382	6.69004	6.38918	8.43181	8.63576	8.23259	7.66842	9.07561	5.95931	6.21589	5.6717	6.4803	6.7909	5.95629	6.5796	6.72329
ENSDARG00000037958	nosip	Turquoise (M1)	8.8804	9.0424	9.0596	9.26558	9.0807	9.81558	9.79837	9.64072	9.32156	9.92686	8.78304	8.93269	8.90217	8.92797	9.2174	8.72147	9.04633	8.97237
ENSDARG00000037962	psmb7	Turquoise (M1)	9.62715	9.7631	9.689	9.7912	9.74572	11.25	11.2525	10.8524	11.0772	11.699	10.8065	10.018	9.68549	10.0264	9.84262	9.62008	9.72984	9.68424
ENSDARG00000037966	thoc6	Turquoise (M1)	6.78635	6.79258	6.88105	6.96963	6.86368	7.80918	7.91479	7.77774	7.47429	7.94201	7.21514	7.08141	7.1688	7.30918	7.29262	6.93133	7.19746	7.36507
ENSDARG00000038005	med25	Turquoise (M1)	9.4323	9.49662	9.60847	9.45469	9.51158	9.77854	9.79672	9.93216	9.74025	9.88898	9.39896	9.47877	9.3775	9.44157	9.42681	9.41933	9.43464	9.39524
ENSDARG00000038006	osr2	Turquoise (M1)	5.02199	5.55008	5.37081	5.12942	5.27791	5.6856	5.63558	5.5415	6.12366	6.36312	5.50447	5.27176	5.1522	5.29372	5.08118	5.24015	5.36712	5.28348
ENSDARG00000038028	ndufa6	Turquoise (M1)	8.08951	8.59581	8.6845	8.28123	8.44424	9.40553	9.55023	9.15758	9.20448	10.0963	8.46535	8.61961	8.48421	8.58246	8.25715	8.40081	8.17788	8.26229
ENSDARG00000038030	rbx1	Turquoise (M1)	9.56342	9.28612	9.34423	9.15174	9.37851	10.5298	10.6647	10.2558	10.2462	11.0851	9.93763	9.56953	9.60271	9.32005	9.03929	9.12876	9.08752	9.15666
ENSDARG00000038068	ddx5	Turquoise (M1)	14.4782	14.4428	14.4856	14.5075	14.5035	16.0628	16.4743	15.8805	15.9174	16.659	14.1806	14.106	14.1839	14.2322	14.2306	14.0498	14.0949	13.9147
ENSDARG00000038074	ergic3	Turquoise (M1)	8.89243	8.81455	8.83383	8.79118	8.86361	9.58274	9.61919	9.35102	9.43377	9.79598	8.97165	8.80003	8.92557	8.99527	8.92825	8.78617	8.92429	8.89841
ENSDARG00000038075	cyc1	Turquoise (M1)	10.6453	10.7056	10.9024	10.7731	10.7903	11.3803	11.4598	11.0957	11.5202	11.6633	11.1435	10.791	10.9093	10.8283	10.8728	10.6612	10.6354	10.7903
ENSDARG00000038076	romo1	Turquoise (M1)	10.0285	9.95458	9.97524	10.1408	10.0611	10.8455	10.8514	10.3012	10.3754	10.948	9.94278	9.98421	10.0349	9.87551	10.0293	9.8849	9.92716	9.83049
ENSDARG00000038141	atf4b	Turquoise (M1)	12.0903	12.0585	12.1224	12.1989	12.1493	13.0962	12.8996	12.6863	12.9959	13.2194	12.3527	12.481	12.0994	12.2562	11.9887	11.9376	11.9813	11.9759
ENSDARG00000038151	zgc:92360	Turquoise (M1)	6.02245	5.84829	5.97955	6.33737	6.04142	8.12122	7.73897	7.46186	7.7147	8.54841	6.84041	6.30131	6.04613	6.16929	5.66728	5.95629	5.63599	6.20117
ENSDARG00000038156	dusp11	Turquoise (M1)	8.83954	8.83803	8.72413	8.79896	8.81016	9.52308	9.0867	9.30928	9.4725	9.55112	9.05267	8.88371	9.00734	8.95076	8.88286	8.75695	9.06019	9.07052
ENSDARG00000038207	aldh4a1	Turquoise (M1)	9.77733	9.6002	9.78724	9.92688	9.78683	8.23093	8.21733	8.7744	8.49642	8.05207	9.5126	9.31352	9.19709	9.54805	8.96864	9.1387	9.07392	9.36062
ENSDARG00000038213	slc35b1	Turquoise (M1)	9.06534	8.82466	9.08263	8.86348	8.97786	9.70622	9.90347	9.50868	9.73548	9.84247	9.34931	9.02116	8.85725	8.6812	8.95773	8.67536	8.92126	8.71467
ENSDARG00000038235	pkdccb	Turquoise (M1)	6.0536	5.7884	5.71567	5.74796	5.80702	6.73792	7.09116	6.75712	6.38637	7.3028	5.714	5.80089	5.42526	5.72662	5.74587	5.899	5.70197	5.99536
ENSDARG00000038290	thoc5	Turquoise (M1)	8.14436	8.50645	8.26793	8.39874	8.35239	8.85885	9.22592	8.90071	8.84567	8.84521	8.67237	8.69332	8.40725	8.43659	8.38768	8.32559	8.49662	8.57912
ENSDARG00000038312	rcl1	Turquoise (M1)	7.66071	8.20955	7.52833	8.17735	7.90478	8.85315	8.79346	8.42898	8.66999	9.11404	7.92678	7.83915	7.74112	7.76291	7.10501	7.70935	7.74663	7.56249
ENSDARG00000038360	thg1l	Turquoise (M1)	6.85513	7.15027	6.928	7.11624	7.02549	7.83844	7.40444	7.64894	7.70163	7.92474	7.32327	7.38145	7.11817	7.03421	7.02229	7.09475	7.48201	7.14723
ENSDARG00000038378	sagb	Turquoise (M1)	6.25245	5.47127	5.71567	5.63412	5.70566	6.35922	7.08014	6.40997	6.01498	6.57685	5.79309	5.69749	5.92539	5.49605	5.49117	5.52102	5.8235	5.78186
ENSDARG00000038398	pmm1	Turquoise (M1)	7.30887	7.49559	7.19013	7.6385	7.39269	5.49549	5.49048	5.60707	5.64564	5.20031	6.84041	7.18009	6.85812	7.17844	7.09156	6.9512	6.82662	7.02411
ENSDARG00000038445	spire1b	Turquoise (M1)	9.89152	10.2198	10.2651	10.174	10.1266	7.90629	8.27085	8.39739	8.47747	7.52648	9.18268	9.68678	9.90424	10.0621	9.91198	9.89915	10.143	9.86968
ENSDARG00000038446	nrp2b	Turquoise (M1)	12.6099	12.6492	12.7505	12.0354	12.516	11.8232	11.7173	12.2759	12.3029	11.5394	11.9146	12.5933	12.3739	12.6085	12.5387	12.8369	12.711	12.6031
ENSDARG00000038456	mrps35	Turquoise (M1)	7.7253	7.80061	7.87954	7.7797	7.82764	8.45458	8.63946	8.42507	8.27716	8.95658	8.1175	8.01291	7.78036	7.7758	7.92418	7.66653	7.95184	7.57993
ENSDARG00000038467	igsf8	Turquoise (M1)	9.57589	9.77008	10.0249	9.65433	9.79234	9.12056	8.99447	9.45036	9.49712	8.69095	9.43235	9.41493	9.81474	9.58126	9.58387	9.79804	9.66967	9.78088
ENSDARG00000038473	ube2d3	Turquoise (M1)	9.88151	9.84144	9.89083	10.0079	9.91878	10.2031	10.4022	10.0647	10.1092	10.6887	10.0637	9.80078	9.7863	9.80231	9.74462	9.72928	9.87953	9.7295
ENSDARG00000038500	cep41	Turquoise (M1)	8.29731	8.05167	7.74412	8.08464	8.07812	6.96018	7.21698	7.32462	7.42728	6.89981	8.07569	7.65984	7.78679	8.12153	7.99012	7.66257	7.86567	8.08526
ENSDARG00000038505	polr2h	Turquoise (M1)	7.04302	7.23467	7.09112	7.2021	7.15888	8.20876	7.74589	8.0206	7.90897	8.42732	7.71267	7.38894	7.1688	7.38723	7.1446	7.56836	7.51488	7.4905
ENSDARG00000038537	gga1	Turquoise (M1)	10.4866	10.435	10.3852	10.4357	10.4511	10.6146	10.8265	10.5154	10.5394	10.8528	10.6017	10.4814	10.4689	10.3122	10.4478	10.3308	10.5179	10.4553
ENSDARG00000038557	anks3	Turquoise (M1)	6.78635	6.40389	6.38185	6.60101	6.54262	7.86142	8.32705	7.90715	7.55662	7.90139	7.15326	7.38894	7.06564	7.08745	7.31584	7.00915	6.70144	6.99813
ENSDARG00000038566	gnptg	Turquoise (M1)	8.04696	8.20955	8.18026	8.29783	8.19977	8.83593	8.66509	8.75274	8.53725	8.70109	8.14919	8.08332	8.01752	7.94493	7.96119	7.93249	8.16764	7.76647
ENSDARG00000038576	ube2d1b	Turquoise (M1)	9.50458	9.29583	9.17601	9.43984	9.3687	10.0988	10.2927	9.99667	9.98082	10.4996	9.60497	9.53157	9.39227	9.39252	9.33996	9.09707	9.23655	9.22424
ENSDARG00000038608	sdhc	Turquoise (M1)	10.0715	10.1372	10.0983	10.162	10.1296	11.111	10.8394	10.9024	10.7086	11.3428	10.0434	9.90383	9.8503	10.07	9.92322	9.6796	9.68406	9.69817
ENSDARG00000038635	magoh	Turquoise (M1)	8.99642	8.86767	8.76586	8.83348	8.89474	9.92402	9.99998	9.73513	9.78247	10.5481	9.34931	8.94028	8.82027	8.76718	9.00792	8.70435	8.81405	8.47647
ENSDARG00000038655	ajap1	Turquoise (M1)	12.3757	12.5789	12.6198	12.4964	12.5096	10.5849	11.2693	11.2743	11.8059	11.0185	11.834	12.0028	12.3576	12.3923	12.2726	12.5025	12.5669	12.2782
ENSDARG00000038658	cavin4a	Turquoise (M1)	5.7395	5.7884	5.77337	5.30984	5.59438	6.51778	5.85155	6.35947	6.6052	6.76119	5.79309	5.31165	5.6717	5.66549	5.62584	5.52102	5.93368	6.02301
ENSDARG00000038667	fggy	Turquoise (M1)	6.5975	6.01188	6.15596	5.88418	6.16812	6.84769	6.92838	6.8316	6.53109	7.47181	6.79434	6.36583	6.17709	6.1898	6.21228	6.32878	6.37317	6.60627
ENSDARG00000038713	tep1	Turquoise (M1)	8.99642	9.08506	8.93857	9.1334	8.99392	7.26897	7.63101	7.72761	7.56387	6.88777	8.88044	8.84921	9.00185	8.89017	8.9902	9.03152	8.97786	8.77981
ENSDARG00000038768	mrpl12	Turquoise (M1)	9.2197	9.01618	9.17838	8.88192	9.10752	10.1874	10.1743	9.91697	10.014	10.5528	9.05028	9.00679	8.7301	9.01702	9.05982	8.57007	9.05189	9.10978
ENSDARG00000038784	faim2a	Turquoise (M1)	10.6429	10.5347	10.7598	10.7024	10.6546	8.63481	8.70093	8.93681	9.15055	8.16409	10.1752	10.3718	10.4286	10.5205	10.5038	10.5256	10.6308	10.4471
ENSDARG00000038786	smarcd3a	Turquoise (M1)	9.89352	9.98491	10.1464	9.96365	10.01	9.03515	9.45911	9.23766	9.77474	9.03078	9.4969	9.70321	9.74911	9.94941	9.91386	10.1315	9.96741	10.0542
ENSDARG00000038787	tmub1	Turquoise (M1)	8.12404	8.43338	8.472	8.38327	8.37714	8.90636	8.80667	8.78967	8.88643	9.00647	8.72727	8.35002	8.32592	8.43659	8.31537	8.19256	8.07755	8.3202
ENSDARG00000038789	tmem53	Turquoise (M1)	8.06128	7.90639	7.90861	8.02598	7.99728	8.77398	8.89593	8.61204	8.55543	8.8961	7.92154	8.15043	7.96182	8.10125	7.74034	7.89259	7.85931	8.08526
ENSDARG00000038812	e2f5	Turquoise (M1)	6.11366	6.08618	6.04865	5.46137	5.92987	7.50002	8.10923	7.06452	6.93635	7.36429	7.05013	6.36583	6.71397	6.06144	6.28785	6.27557	6.05869	6.57089
ENSDARG00000038835	ppid	Turquoise (M1)	9.4568	9.5725	9.47758	9.70694	9.58759	10.292	10.0284	10.0809	10.2695	10.6845	9.63077	9.40218	9.56412	9.50448	9.50624	9.32304	9.34467	9.51922
ENSDARG00000038865	acox3	Turquoise (M1)	9.00383	9.1183	9.11029	9.26558	9.13095	8.57721	8.95051	9.13147	8.78536	8.54841	9.02617	9.34812	9.13574	9.17286	9.17411	9.30298	9.19444	9.18238
ENSDARG00000038866	trappc8	Turquoise (M1)	10.7602	10.8526	11.0723	10.6909	10.8426	10.0337	10.2255	10.3889	10.4846	9.54551	10.7502	10.9224	10.7958	10.7799	10.8958	10.8913	10.8954	11.0387
ENSDARG00000038878	il12a	Turquoise (M1)	5.02199	4.16044	4.73353	4.98364	4.78307	6.23561	6.29597	5.78341	6.46871	7.10034	5.47093	5.14045	4.74046	4.97182	4.16044	4.95218	4.50414	4.78628
ENSDARG00000038898	zgc:113691	Turquoise (M1)	6.25245	5.55008	6.15596	5.46137	5.80702	7.36112	5.9332	6.73136	7.45098	7.62274	5.9813	5.72422	5.81934	5.1992	6.26314	6.25366	5.56586	5.2284
ENSDARG00000038905	hectd3	Turquoise (M1)	9.8694	9.82309	9.92236	9.86897	9.89162	10.5146	10.228	10.3789	10.1563	10.3682	10.2899	9.93324	9.95197	9.78974	9.9101	9.90166	9.76579	9.98937
ENSDARG00000038918	drd1b	Turquoise (M1)	7.53234	7.49559	7.55071	7.48169	7.50555	5.84823	6.27608	6.30695	6.70255	6.08564	7.43852	6.75835	7.38069	7.51615	7.29262	7.48552	7.32386	7.35494
ENSDARG00000038974	DPYSL2 (1 of many)	Turquoise (M1)	10.6358	11.0061	11.1596	10.7662	10.9118	8.21767	8.22228	8.65938	8.91766	7.74609	10.9656	10.6472	10.9159	10.9112	11.1052	11.3982	11.2364	11.4819
ENSDARG00000038980	txndc12	Turquoise (M1)	9.41851	9.17731	9.01507	9.3527	9.25605	10.3658	11.0434	10.1212	10.6997	11.1257	10.296	9.48569	9.249	9.14598	9.27121	9.21984	9.19444	9.448
ENSDARG00000038985	cdyl	Turquoise (M1)	8.80176	8.7594	9.01507	8.64766	8.79557	7.60619	7.88383	7.89585	8.4388	7.25718	9.05981	8.84113	8.74662	8.82383	8.70731	9.00693	8.66226	8.77981
ENSDARG00000039005	trappc1	Turquoise (M1)	8.77167	8.66124	8.64375	8.94289	8.7734	9.03766	9.0867	9.12667	9.02584	9.42643	8.8228	8.77479	8.66899	8.55668	8.51229	8.47677	8.6104	8.39067
ENSDARG00000039065	trpc2a	Turquoise (M1)	6.2785	5.95976	5.44937	5.67335	5.83894	8.856	9.9503	8.78358	8.5876	9.22353	7.70657	6.54237	7.22723	7.0664	6.47027	5.85417	6.70144	6.02301
ENSDARG00000039152	fbxo36b	Turquoise (M1)	5.46968	5.0718	5.19157	4.98364	5.16471	6.21695	6.44503	5.93652	6.67544	5.9201	5.86717	5.45665	5.50166	5.66549	5.39077	5.36698	5.36712	5.2284
ENSDARG00000039174	olfm3b	Turquoise (M1)	8.39655	8.38404	8.46421	8.18333	8.38204	10.2526	11.6851	10.2112	10.4597	10.4354	9.89303	8.30365	9.63498	8.84222	9.41092	8.39844	9.25835	8.46718
ENSDARG00000039181	trpm3	Turquoise (M1)	11.3882	11.4064	11.5353	11.4637	11.4415	10.0324	10.0999	10.3748	10.6874	9.90074	10.7392	10.8357	11.2479	11.1462	11.2676	11.0337	11.218	10.8051
ENSDARG00000039185	nfyba	Turquoise (M1)	9.34458	9.47326	9.26593	9.53603	9.4337	10.0045	9.83587	9.86031	9.82048	9.97634	9.42868	9.43831	9.369	9.37369	9.49372	9.37679	9.44101	9.45505
ENSDARG00000039213	prpf38a	Turquoise (M1)	7.7957	7.83452	7.67124	8.05886	7.87023	8.48439	8.75648	8.34039	8.45051	8.91944	8.11292	7.83915	7.82481	8.04926	8.00437	7.69004	7.82708	7.80397
ENSDARG00000039218	gpr101	Turquoise (M1)	9.26357	9.59037	9.50056	9.60196	9.47545	7.10375	7.11293	7.36639	7.79684	6.7344	8.78304	8.97022	9.17287	9.52358	9.37041	9.39111	8.91822	9.19927
ENSDARG00000039220	st6galnac5a	Turquoise (M1)	8.81868	9.0539	8.73063	9.49354	8.97786	8.01268	7.97478	8.23259	8.45439	7.56428	8.19762	8.67221	8.71674	9.03844	9.04273	8.6557	9.19444	9.10381
ENSDARG00000039225	vps13a	Turquoise (M1)	11.4673	11.8925	11.6856	11.8332	11.7267	11.0839	11.5435	11.2814	11.1247	10.6725	11.4778	11.5956	11.5547	11.44	11.8115	11.7159	11.5741	11.6833
ENSDARG00000039240	cacng5b	Turquoise (M1)	9.37917	9.45387	9.46984	9.39949	9.4195	7.87277	8.0713	8.2281	8.42303	7.43959	9.33761	9.22527	9.30357	9.23216	9.15833	9.5074	9.19946	9.33283
ENSDARG00000039264	igfbp5a	Turquoise (M1)	10.4984	10.4783	10.4998	10.6214	10.5434	8.99435	9.19362	9.42518	9.42392	8.60714	9.57206	9.80216	10.263	10.2516	10.1233	10.1093	10.2483	10.1514
ENSDARG00000039268	emc4	Turquoise (M1)	6.5139	6.62818	6.64729	6.7897	6.6132	7.08412	7.98648	7.10477	7.43523	7.47181	6.7222	6.67354	6.45586	6.75888	6.13198	6.15017	5.90707	6.05006
ENSDARG00000039335	st6gal2a	Turquoise (M1)	13.1202	12.966	13.0587	13.025	13.0531	12.5839	12.4857	12.8252	12.6672	12.1142	12.6432	13.1143	13.0973	12.9164	13.0966	13.0815	13.243	13.2362
ENSDARG00000039338	gadd45gip1	Turquoise (M1)	7.18224	7.52088	7.32664	7.07776	7.33268	8.32049	8.14096	8.03609	8.16306	8.86638	7.83494	7.71427	7.43109	7.46917	7.22056	7.38794	7.23758	7.2162
ENSDARG00000039345	drg1	Turquoise (M1)	9.34166	9.32697	9.35267	9.3918	9.37606	10.2098	10.1092	9.85742	10.1563	10.4099	9.87695	9.62857	9.354	9.43553	9.62577	9.27236	9.28927	9.4989
ENSDARG00000039346	ndufa5	Turquoise (M1)	8.89243	8.78724	8.89296	8.88923	8.91176	9.75585	9.66159	9.40353	9.29155	10.0679	8.7569	8.7288	8.7662	8.65367	8.76685	8.52743	8.59904	8.38575
ENSDARG00000039350	ssbp1	Turquoise (M1)	6.73239	7.20361	6.86906	7.11624	6.9998	7.95515	8.21236	7.66236	7.60662	8.27252	7.5519	7.18872	7.22723	7.34441	7.13153	7.16415	7.4226	7.18214
ENSDARG00000039363	dnajb12a	Turquoise (M1)	9.41851	9.28855	9.2837	9.35006	9.35633	10.1262	9.99567	9.86752	10.1129	10.3186	9.45419	9.42756	9.42134	9.31347	9.34833	9.13018	9.27032	9.30189
ENSDARG00000039373	epha3	Turquoise (M1)	9.87748	10.1412	10.1585	10.2095	10.035	9.03012	8.81977	9.08026	9.40603	8.43139	9.62917	9.92817	9.64205	9.70525	10.2685	10.2818	10.0695	10.7257
ENSDARG00000039385	dlg4b	Turquoise (M1)	11.0021	11.3996	11.4825	10.9554	11.2471	9.75433	10.7896	10.5525	10.7086	9.89045	10.5494	10.7187	11.1341	11.1706	11.0928	11.1998	11.3686	11.0379
ENSDARG00000039400	polr1c	Turquoise (M1)	7.82964	7.52921	7.36935	7.834	7.65958	9.24096	9.06762	8.60515	9.0022	9.35766	8.26939	7.85536	7.69392	7.65539	7.8707	7.75091	8.03874	7.86909
ENSDARG00000039422	fuom	Turquoise (M1)	5.65667	5.9861	5.37081	5.50725	5.63272	6.64599	7.38678	6.25222	6.20434	6.93531	5.74097	5.52209	5.6717	5.1992	5.08118	5.26691	5.49085	5.33551
ENSDARG00000039424	snrpb2	Turquoise (M1)	7.41383	7.41687	7.459	7.6385	7.50555	8.56332	8.51207	8.15908	8.21439	8.75725	7.9057	7.90292	7.63085	7.56905	7.34997	7.42122	7.48201	7.6722
ENSDARG00000039434	oprm1	Turquoise (M1)	9.34458	9.77008	9.72846	9.83534	9.6598	8.43944	8.28983	8.5452	8.96735	8.03609	9.32581	9.41855	9.26971	9.52168	9.47855	9.56852	9.45156	9.46904
ENSDARG00000039435	rgs17	Turquoise (M1)	9.92507	9.93297	9.95043	9.91976	9.95201	9.06008	9.25512	9.34896	9.53787	9.05994	9.6435	9.75568	9.89391	9.74486	10.0084	9.83079	10.0307	9.99422
ENSDARG00000039456	acbd6	Turquoise (M1)	9.56842	9.68024	9.70228	9.65433	9.66582	9.08701	9.31178	9.23988	9.3757	9.08596	9.52297	9.55644	9.53781	9.46548	9.67759	9.58833	9.63492	9.6519
ENSDARG00000039466	hnrnph3	Turquoise (M1)	8.49991	8.26019	8.25895	8.49301	8.41108	9.25614	9.08127	9.21523	9.02323	8.71784	8.17141	8.43849	8.08162	8.21883	8.40386	8.46777	8.07755	8.02314
ENSDARG00000039477	terb2	Turquoise (M1)	5.30345	5.0718	4.73353	4.89868	4.96023	6.45661	6.12756	5.66895	5.54829	6.01739	5.50447	5.23008	5.20368	5.24767	4.81693	4.98981	4.84308	5.03884
ENSDARG00000039482	calhm2	Turquoise (M1)	5.30345	5.2927	4.82077	4.80149	5.0344	6.67289	6.0097	5.86242	5.8705	6.65074	5.84299	5.18641	5.34264	5.72662	5.4422	5.12431	5.41006	5.2284
ENSDARG00000039493	naa20	Turquoise (M1)	8.29731	8.68734	8.5328	8.6985	8.59523	9.31942	9.35512	8.89508	9.15055	9.80384	8.81999	8.65386	8.9486	8.67094	8.61774	8.62974	8.58375	8.49028
ENSDARG00000039497	ccdc85a	Turquoise (M1)	9.96165	10.4028	10.2392	10.4919	10.285	8.41643	8.06028	8.64601	9.12159	8.38177	9.34347	9.14006	9.77186	9.96766	9.75094	9.84472	9.8351	9.82506
ENSDARG00000039500	LRFN3	Turquoise (M1)	9.87142	10.0538	10.0236	10.102	10.0303	8.42029	8.38113	8.58077	8.70298	7.69258	9.44513	9.20023	9.64557	9.94941	9.72334	10.0131	10.0377	10.0635
ENSDARG00000039512	ap1m3	Turquoise (M1)	6.9678	7.22439	6.68914	6.8826	6.94695	6.59051	6.6105	6.47444	6.7159	6.19175	6.86287	6.97521	6.95421	7.12862	7.17038	7.18654	6.94132	7.14723
ENSDARG00000039543	mrps6	Turquoise (M1)	7.14191	7.18252	7.03885	7.11624	7.15888	7.89521	8.00385	7.69536	7.68844	8.24038	7.37051	7.25595	7.28333	7.26388	7.46849	7.07685	7.12437	7.24946
ENSDARG00000039601	ier3ip1	Turquoise (M1)	8.56155	8.21469	8.472	8.38327	8.44892	9.16259	9.88647	8.79573	9.02584	9.52665	8.30195	8.11055	8.27664	8.04926	8.10033	8.26453	8.03311	8.07305
ENSDARG00000039649	mtif3	Turquoise (M1)	6.49215	6.64397	6.95089	6.75728	6.72848	7.54345	7.22697	7.08479	7.24011	7.7721	7.0006	7.00499	6.52121	6.81089	6.73955	6.69937	6.94132	6.72329
ENSDARG00000039667	mrpl38	Turquoise (M1)	8.47342	8.37488	8.45245	8.59048	8.50386	8.92005	9.03713	8.77132	9.05166	9.4305	8.83673	8.41324	8.4763	8.53043	8.58502	8.42193	8.24755	8.53539
ENSDARG00000039699	fam204a	Turquoise (M1)	8.52075	8.49383	8.30329	8.34119	8.43484	8.98917	8.85835	8.83158	8.84271	9.23983	8.30998	8.36891	8.11772	8.16613	8.33238	8.4196	8.19309	8.23518
ENSDARG00000039724	OSBPL8	Turquoise (M1)	10.4518	10.5439	10.5648	10.4144	10.399	9.02759	9.14505	9.08026	9.28067	8.32162	10.2311	10.2531	10.2422	10.3056	10.3162	10.495	10.4236	10.5071
ENSDARG00000039824	zgc:172182	Turquoise (M1)	8.52075	8.58791	8.37981	8.14711	8.42063	7.18879	7.38678	7.74031	7.62059	7.43959	7.74869	8.15043	8.37782	8.41214	8.65424	8.84635	8.60662	8.49942
ENSDARG00000039830	gng5	Turquoise (M1)	8.21008	7.96873	8.08179	7.95085	8.05373	9.99934	10.2727	9.71929	9.62122	10.5528	9.47214	8.68431	8.561	8.54549	8.28072	8.04287	8.2329	8.33559
ENSDARG00000039872	lamtor2	Turquoise (M1)	8.50515	8.40218	8.37567	8.49301	8.48578	9.30698	8.88351	9.07529	8.92327	9.44664	8.18894	8.31148	8.30819	8.12656	8.32106	8.0994	8.28115	8.17366
ENSDARG00000039880	arpp19b	Turquoise (M1)	8.69585	8.61147	8.35476	8.70266	8.61615	9.59302	9.30482	9.25095	9.13614	9.60065	8.99172	8.90454	8.7301	8.6606	8.51229	8.5122	8.43829	8.54424
ENSDARG00000039882	ap3s2	Turquoise (M1)	9.5858	9.40309	9.26369	9.52201	9.46858	9.81411	10.0563	9.60495	9.66368	10.0731	9.36861	9.16831	9.39646	9.38418	9.33436	9.30424	9.31261	9.1852
ENSDARG00000039887	c1qbp	Turquoise (M1)	8.5914	8.83803	8.6845	8.66481	8.72416	10.202	10.1499	9.79228	10.1117	10.3618	9.75325	9.06806	8.68965	8.84527	8.73739	8.61148	8.52892	8.94257
ENSDARG00000039899	zbtb7a	Turquoise (M1)	8.04696	8.30428	8.53652	8.15321	8.25425	6.47217	6.6105	6.7824	7.19386	6.28973	8.42898	8.23939	8.1873	8.31434	8.20265	8.30046	8.1625	8.19633
ENSDARG00000039901	sh3gl2b	Turquoise (M1)	9.9749	10.2083	10.4515	10.2254	10.1865	7.20701	7.56206	7.72122	7.83321	6.95848	9.55195	9.75282	9.98433	9.94941	10.0921	10.0998	10.1299	10.1163
ENSDARG00000039913	tmem147	Turquoise (M1)	8.85192	8.82466	8.59114	8.74357	8.7734	10.1203	9.83103	9.81034	9.70003	10.1759	9.41575	9.07267	8.70326	8.9564	8.87515	8.72901	8.80748	8.75716
ENSDARG00000039915	bola1	Turquoise (M1)	7.45808	7.20361	7.41081	7.29419	7.363	7.92277	7.99229	7.7148	7.61362	8.17871	7.2744	7.3201	7.53449	7.3617	7.34997	7.23028	7.23758	7.20494
ENSDARG00000039951	si:ch211-87j1.4	Turquoise (M1)	7.77842	8.0226	8.15627	7.6815	7.92511	6.88241	7.01216	7.23717	7.51231	6.78746	7.8843	7.76096	7.80593	7.95628	8.08701	7.99973	7.93985	8.15641
ENSDARG00000039958	utp11l	Turquoise (M1)	7.19543	6.98905	6.98453	6.86755	7.03816	7.94444	8.21236	7.50727	7.74686	8.24964	7.4087	7.10902	7.03314	6.93291	7.13153	7.03415	7.08081	6.78589
ENSDARG00000039969	akirin1	Turquoise (M1)	9.78594	9.8079	9.76528	9.87634	9.82859	10.1542	10.0728	9.98081	10.1682	10.4109	9.76203	9.8817	9.87151	9.88883	9.81874	9.68832	9.90584	9.68424
ENSDARG00000039979	tecrl2b	Turquoise (M1)	4.83168	4.85417	4.73353	4.80149	4.78307	5.87327	6.40931	5.60707	5.36311	6.46605	4.93403	4.47571	5.53787	5.1992	5.00326	4.8253	5.22554	4.96431
ENSDARG00000040005	scfd2	Turquoise (M1)	8.72307	8.7594	8.88716	8.91093	8.81741	7.77931	7.6084	7.93499	7.95366	7.24788	8.41044	8.52182	8.67591	8.54549	8.86351	8.867	8.89365	8.87054
ENSDARG00000040021	ebag9	Turquoise (M1)	9.37347	9.36899	9.47758	9.5173	9.45473	9.83302	9.80332	9.63059	9.8443	10.0349	9.3952	9.31158	9.23034	9.44759	9.20516	9.17778	9.38045	9.15666
ENSDARG00000040070	coil	Turquoise (M1)	7.51152	7.38042	7.55071	7.57602	7.51456	8.62815	9.221	8.39739	8.68988	9.25137	8.12207	7.51046	7.5268	7.50066	7.83921	7.41179	7.60913	7.45308
ENSDARG00000040081	zp3d.1	Turquoise (M1)	5.41727	5.2927	5.37081	5.55121	5.37886	6.81207	6.65642	6.35947	6.24285	7.4232	5.19798	5.77589	5.20368	5.89278	5.39077	5.95629	5.45125	5.67703
ENSDARG00000040137	jdp2a	Turquoise (M1)	7.18224	7.17185	7.34388	7.23735	7.23758	6.23561	5.90659	6.2144	6.46871	5.96971	7.15326	7.18872	7.08689	7.00126	6.82409	6.76867	7.03585	6.80111
ENSDARG00000040179	zgc:101562	Turquoise (M1)	5.17407	5.24239	5.48649	5.36297	5.3297	6.67289	5.85155	6.70511	6.33438	6.49865	5.93693	5.80089	5.42526	5.41994	5.4422	5.75908	5.49085	5.63982
ENSDARG00000040230	si:dkey-37m8.11	Turquoise (M1)	4.5503	4.76265	4.49276	4.80149	4.67012	6.09887	6.31555	6.17544	4.96047	6.21195	5.95931	4.70437	4.74046	4.90271	4.81693	4.77675	4.50414	4.52365
ENSDARG00000040246	rap2ab	Turquoise (M1)	9.711	10.1113	10.3852	9.4596	9.93216	7.32831	7.04656	7.7961	7.90897	6.81323	9.25083	9.65644	9.87001	9.95505	9.44513	9.91493	9.79093	9.7295
ENSDARG00000040249	tlr18	Turquoise (M1)	7.10038	5.95976	5.85491	5.81804	6.11896	8.19077	7.96298	7.39893	7.34527	8.28608	7.32327	6.69832	7.22723	6.41348	7.02229	5.82332	6.21506	6.12787
ENSDARG00000040265	mpdu1b	Turquoise (M1)	8.14436	8.61924	8.60889	8.4882	8.47665	9.69195	9.03992	8.6792	9.43964	9.29661	8.88044	8.78606	8.44016	8.54923	8.46168	8.39844	8.26205	8.05453
ENSDARG00000040277	fbxo32	Turquoise (M1)	7.18224	7.52921	7.49793	7.23735	7.38286	6.11933	5.85155	6.59471	6.38637	5.84164	6.60627	7.28035	7.22723	7.41232	7.40508	7.51661	7.76036	7.31369
ENSDARG00000040280	zgc:110182	Turquoise (M1)	5.61284	5.9861	5.71567	6.06336	5.87002	7.9173	8.20738	6.81947	6.91353	7.83513	6.53728	5.77589	5.89974	5.94338	6.13198	6.07619	5.76433	5.38488
ENSDARG00000040287	ywhabl	Turquoise (M1)	13.2783	13.2111	13.3263	13.3936	13.3353	13.6378	14.0733	13.7297	13.5481	13.874	13.3595	13.1236	13.2406	13.2641	13.243	13.381	13.2344	13.3586
ENSDARG00000040302	osgin2	Turquoise (M1)	8.53106	8.49383	8.35476	8.54025	8.44892	7.00274	6.67138	7.12447	7.28489	6.67921	7.57887	7.60325	8.11772	8.12656	7.89386	7.98717	8.09387	8.15641
ENSDARG00000040334	mat2aa	Turquoise (M1)	11.2749	11.3157	11.4146	11.3172	11.3628	10.7409	10.816	11.0666	11.2855	10.5045	11.0835	11.1517	11.1434	11.3091	11.149	11.0838	11.2624	11.0916
ENSDARG00000040387	mmd	Turquoise (M1)	10.0084	10.1058	10.2289	10.2022	10.154	8.50998	8.59443	8.7744	8.92047	7.96471	10.1091	10.0393	9.94198	9.9064	9.86417	9.74423	10.0123	9.68424
ENSDARG00000040396	bcl7bb	Turquoise (M1)	6.90455	7.27504	7.12157	6.9268	7.08771	8.03303	8.11457	8.03094	7.64812	8.28158	7.43852	7.27226	7.3548	6.9675	7.1446	7.11243	6.98939	7.0622
ENSDARG00000040432	klf2b	Turquoise (M1)	7.12821	7.0488	7.459	7.23735	7.2266	8.82724	8.98288	7.7148	8.08996	8.66009	7.84606	6.90313	6.98859	6.79807	6.91911	7.29342	7.08081	7.36507
ENSDARG00000040439	rsl24d1	Turquoise (M1)	10.0715	9.97588	9.8467	10.1933	10.0581	10.6096	10.7268	10.2547	10.4384	10.7558	10.3562	10.2521	10.0173	10.1545	10.0971	9.7581	9.80909	9.9731
ENSDARG00000040440	snrpd2	Turquoise (M1)	9.01488	8.82466	8.89585	8.90373	8.93856	10.2951	10.3748	9.97281	10.154	10.7469	9.68564	9.36324	9.09248	9.2368	9.07671	8.72147	8.82383	9.08575
ENSDARG00000040443	polr2i	Turquoise (M1)	7.56301	7.343	7.16116	7.51065	7.40244	8.74043	8.19232	8.47887	8.52623	8.95939	7.43112	7.62868	7.43932	7.3617	7.45811	7.36367	7.35148	7.20494
ENSDARG00000040455	unc50	Turquoise (M1)	8.04696	8.24518	8.24537	8.31967	8.23271	8.98657	8.96237	8.88658	8.86619	9.35124	8.24865	8.36891	8.20658	8.13655	8.12008	8.08768	8.21314	8.10338
ENSDARG00000040535	csgalnact1a	Turquoise (M1)	7.15549	7.36184	7.35242	7.53904	7.37297	6.87094	6.97687	6.66476	6.84271	6.25143	7.06946	7.02449	7.01104	7.10819	7.6704	7.60598	7.52298	7.38511
ENSDARG00000040547	b3gat1a	Turquoise (M1)	11.9731	12.0272	12.158	11.9385	12.008	10.1817	10.6215	10.8618	10.553	10.0093	10.9362	11.9072	11.6599	11.9629	11.8976	11.7886	11.7885	11.8489
ENSDARG00000040556	ift20	Turquoise (M1)	7.19543	7.0488	7.2826	6.65513	7.07548	7.55763	7.71098	7.46953	7.18442	7.87166	7.05013	7.07208	6.97722	7.12862	7.13153	7.21947	7.18725	7.1354
ENSDARG00000040557	exosc5	Turquoise (M1)	6.95226	7.36184	7.22785	7.52964	7.27	8.2571	8.59443	8.10626	7.94815	8.66701	7.43112	7.29638	7.04405	6.94454	7.29262	7.18098	7.33313	7.29261
ENSDARG00000040564	hnrnpul1	Turquoise (M1)	10.6699	10.6845	10.7023	10.8722	10.7709	10.2406	10.0157	10.4255	10.4295	9.93117	10.6403	10.5299	10.6288	10.8152	10.8267	10.6488	10.712	10.6824
ENSDARG00000040571	ube4a	Turquoise (M1)	10.5218	10.648	10.6339	10.6982	10.6281	10.0783	10.1666	10.2021	10.5503	9.76575	10.6474	10.634	10.4798	10.7008	10.5815	10.4739	10.5633	10.535
ENSDARG00000040584	eef1akmt1	Turquoise (M1)	6.71393	6.83418	6.86906	6.89749	6.83477	7.84422	8.00385	7.45414	7.24918	7.96471	6.82903	6.90313	6.65753	6.70481	6.70421	6.82746	6.7585	6.80111
ENSDARG00000040608	gcnt7	Turquoise (M1)	5.51956	5.24239	4.96576	5.25359	5.22308	5.94541	7.21698	6.23345	6.45265	6.78746	5.36317	4.98497	5.25234	5.33763	5.27911	5.52102	5.32222	5.90845
ENSDARG00000040610	si:ch73-352p4.8	Turquoise (M1)	7.40254	6.64397	6.72974	6.65513	6.86368	5.6856	5.32189	6.11467	5.7061	5.89451	6.87397	7.27226	7.42281	7.46917	7.57783	7.66257	7.11361	7.02411
ENSDARG00000040627	grik1b	Turquoise (M1)	7.072	7.343	7.6507	7.03819	7.2912	5.49549	5.60108	5.75584	5.79119	5.24884	6.84041	6.84923	7.14877	7.32691	7.05041	7.04648	7.40515	7.23846
ENSDARG00000040633	PRMT8	Turquoise (M1)	9.73345	9.29825	9.68232	9.77946	9.61484	7.79731	7.98648	7.52945	8.18194	7.32065	8.50433	8.82483	9.32131	9.05693	9.35665	9.31805	9.16908	9.37803
ENSDARG00000040635	rnf11b	Turquoise (M1)	9.70873	9.63887	9.59074	9.50547	9.6086	8.79493	8.99735	9.20616	9.57571	8.76048	9.58036	9.74995	9.58079	9.73013	9.73402	9.76453	9.89352	9.72368
ENSDARG00000040644	pxylp1	Turquoise (M1)	8.75419	8.57198	8.93013	8.37808	8.67715	8.06304	7.52226	8.2281	8.19128	7.87765	8.60554	8.75198	8.83579	8.58974	8.8439	8.89576	8.74703	8.83853
ENSDARG00000040650	gps1	Turquoise (M1)	9.85718	9.87584	9.89662	9.91082	9.90696	10.2109	10.2058	10.0124	10.2891	10.5035	10.1194	9.80632	9.81943	9.78658	9.84656	9.57271	9.79093	9.73337
ENSDARG00000040700	nab1b	Turquoise (M1)	9.66502	9.98491	10.5575	9.74768	9.96184	7.93905	8.03797	8.62232	8.77609	7.62274	8.91237	9.20863	9.40688	9.44759	9.42154	9.7581	9.6423	9.60831
ENSDARG00000040703	BX936415.1	Turquoise (M1)	8.06839	8.50645	8.70775	8.41911	8.45358	6.27214	6.75787	6.69179	6.92499	6.04055	7.37051	7.72609	8.01205	8.05454	7.86289	8.11102	8.30001	7.8971
ENSDARG00000040705	glsb	Turquoise (M1)	12.5855	12.6186	12.7509	12.8168	12.715	11.6405	11.6707	11.9901	11.9324	11.1804	12.0058	12.2557	12.4914	12.184	12.5405	12.2102	12.553	12.2845
ENSDARG00000040713	rbbp9	Turquoise (M1)	8.45188	8.66874	8.67442	8.74357	8.66516	9.61672	8.98579	9.05774	9.38588	9.45265	8.70313	8.73754	8.432	8.34051	8.63154	8.42425	8.72978	8.7723
ENSDARG00000040730	wdr75	Turquoise (M1)	9.58827	9.53608	9.40028	9.71928	9.56628	10.5676	9.98264	10.3728	10.3266	10.2752	9.74146	9.68978	9.36045	9.2368	9.79649	9.49198	9.53727	9.76206
ENSDARG00000040778	ralba	Turquoise (M1)	9.00383	8.72021	8.90737	8.91452	8.91513	8.19979	8.04917	8.31947	8.56982	7.78493	9.29588	8.89936	9.06378	8.88426	9.14557	9.04366	9.11434	8.95589
ENSDARG00000040853	shoc2	Turquoise (M1)	11.4511	11.6142	11.788	11.5526	11.5734	9.9049	10.3659	10.4127	10.8119	9.93404	11.3326	11.4809	11.4998	11.5646	11.5635	11.5534	11.636	11.7032
ENSDARG00000040861	tcf25	Turquoise (M1)	9.45139	9.47967	9.43449	9.57051	9.50264	10.1658	10.197	10.0445	9.73866	10.5977	9.50564	9.45604	9.39227	9.42134	9.40291	9.36717	9.34467	9.37308
ENSDARG00000040869	upp1	Turquoise (M1)	8.35652	8.1246	8.57677	8.57242	8.42539	6.7755	7.18657	7.01251	7.64812	6.83853	8.29792	7.94391	8.0972	7.96754	7.68821	7.75091	7.872	7.94484
ENSDARG00000040930	deptor	Turquoise (M1)	10.1419	10.1168	9.97933	10.2708	10.1382	8.7649	8.93556	8.90632	9.05422	8.49499	9.3952	9.71651	9.84571	9.90056	9.62117	9.69315	9.84634	9.4783
ENSDARG00000040984	hspa13	Turquoise (M1)	9.83036	9.77008	9.68232	9.88184	9.79051	10.6666	10.281	10.3012	10.6575	10.5574	9.73998	9.8364	9.94198	9.77865	9.64627	9.65609	9.64414	9.42904
ENSDARG00000040988	tpi1b	Turquoise (M1)	12.21	12.157	12.1562	12.1534	12.2086	12.5833	12.1997	12.3798	12.5061	12.6153	12.3544	11.9572	12.2685	12.0875	12.1067	12.0732	12.1597	12.1247
ENSDARG00000041011	gemin7	Turquoise (M1)	6.14266	6.2442	6.27382	6.09086	6.21546	7.26897	7.31383	7.09482	7.01339	7.73951	6.69728	6.80454	6.53706	6.5283	6.42698	6.45779	6.46311	6.31474
ENSDARG00000041022	pdcd4b	Turquoise (M1)	10.8584	11.001	11.2414	10.8593	11.0371	10.0198	9.64881	10.4754	10.1141	9.62745	10.2447	10.9526	10.8782	11.0735	10.892	10.9207	11.0567	10.714
ENSDARG00000041072	mier1a	Turquoise (M1)	8.71406	8.72741	8.79406	8.64766	8.73184	9.3256	9.11086	8.88374	8.94548	9.25137	8.68783	8.72295	8.77911	8.60779	8.61774	8.67341	8.78761	8.70681
ENSDARG00000041086	LO018380.1	Turquoise (M1)	11.1226	11.4187	11.3199	11.4477	11.324	9.4627	8.97412	9.46183	9.89221	8.754	10.3239	10.2162	10.6657	10.8368	10.4582	10.9009	10.6881	10.276
ENSDARG00000041110	dnajc3a	Turquoise (M1)	7.99565	7.87417	8.00859	8.23599	8.04757	9.54265	9.61357	9.37953	9.35304	9.9211	8.55245	8.34239	7.96182	8.01713	8.146	7.89932	8.03874	7.96482
ENSDARG00000041113	wdr18	Turquoise (M1)	8.52075	8.28485	8.34631	8.37808	8.39663	9.10867	9.21358	8.9827	9.19756	9.32964	8.69397	8.66307	8.48421	8.48427	8.7543	8.4196	8.60284	8.84928
ENSDARG00000041137	dhrs13a.3	Turquoise (M1)	8.55146	8.11912	8.38394	8.5121	8.38204	7.72391	7.6084	8.00493	7.75952	7.14123	8.21483	8.68732	8.54974	8.58974	8.97946	8.91572	9.13019	8.61738
ENSDARG00000041155	morf4l1	Turquoise (M1)	9.62715	9.61385	9.53249	9.61083	9.62518	9.97204	10.02	9.7113	9.76853	9.92686	9.62276	9.57278	9.48371	9.54805	9.67759	9.55375	9.66242	9.59349
ENSDARG00000041170	aagab	Turquoise (M1)	8.69585	8.81793	8.49127	8.7636	8.70476	9.01745	9.221	9.01163	9.20907	9.0911	8.74807	8.72295	8.58326	8.74127	8.77101	8.56164	8.62541	8.44371
ENSDARG00000041199	alg12	Turquoise (M1)	7.87095	7.74462	7.99241	7.84914	7.87721	8.62481	8.88351	8.61204	8.46598	9.25367	8.38408	8.11951	7.92733	8.0117	7.88618	7.75091	7.99884	8.05453
ENSDARG00000041203	drap1	Turquoise (M1)	9.72899	9.8045	10.2035	9.74164	9.90016	10.1179	10.2341	10.2656	10.4246	10.5453	10.0825	9.97071	9.97035	10.0358	9.81069	9.89078	9.90584	9.97147
ENSDARG00000041215	cetn4	Turquoise (M1)	7.6417	7.69375	7.61579	7.94382	7.7537	8.28703	8.19736	8.32368	8.02866	8.45956	7.49634	7.73196	7.72108	7.65539	7.42653	7.41179	7.55491	7.23846
ENSDARG00000041217	xpo6	Turquoise (M1)	11.0067	10.9725	11.1415	11.0033	11.0386	11.3176	11.7637	11.3519	11.0891	11.5535	10.9789	10.8417	10.8449	10.8722	10.9672	10.9059	10.9544	10.8915
ENSDARG00000041223	fam173a	Turquoise (M1)	6.90455	7.255	6.98453	7.03819	7.07548	7.55763	8.25645	7.46953	7.45879	7.84741	7.06946	7.15386	7.06564	7.05575	7.1446	6.99648	6.94132	6.99813
ENSDARG00000041239	wdr20b	Turquoise (M1)	8.74093	8.72741	8.78784	8.73953	8.75088	8.0827	7.60078	8.2281	8.22352	7.66506	8.46535	8.5748	8.64451	8.3662	8.53695	8.6257	8.63656	8.74953
ENSDARG00000041243	setdb1a	Turquoise (M1)	10.7146	10.7129	10.7261	10.8869	10.7681	10.3737	10.3614	10.6384	10.8498	10.4595	10.6701	10.6587	10.791	10.7736	10.7593	10.7308	10.6465	10.8609
ENSDARG00000041306	mrps25	Turquoise (M1)	8.63506	8.194	8.40036	8.35182	8.43484	9.53023	9.59847	9.02716	8.81281	9.52665	8.4067	7.99353	8.30819	7.88086	8.44092	7.96811	7.97554	8.01677
ENSDARG00000041314	ndufb9	Turquoise (M1)	10.1352	9.96679	9.98341	9.93042	10.0272	10.9038	10.7543	10.5658	10.6053	11.2464	10.1631	9.88563	10.0064	9.86656	9.81874	9.64816	9.65148	9.58708
ENSDARG00000041317	rangap1a	Turquoise (M1)	9.04752	9.13192	9.19726	9.09284	9.15113	9.25614	9.1911	9.31562	9.33002	9.29661	9.20002	9.0448	9.09248	9.11606	9.0666	8.99447	8.9866	9.06746
ENSDARG00000041362	chmp7	Turquoise (M1)	9.08644	9.24659	9.26816	9.30708	9.26931	9.61504	10.4291	9.58935	9.61605	9.84704	9.38006	9.20443	9.26742	9.21815	9.19591	9.06467	9.04074	8.97237
ENSDARG00000041376	rmi1	Turquoise (M1)	6.82117	6.93933	6.88105	6.83694	6.87791	7.28618	7.24674	7.19131	7.26715	7.7721	7.06946	6.51452	6.71397	6.4803	6.82409	6.89072	6.62659	6.83104
ENSDARG00000041391	tmed10	Turquoise (M1)	10.4693	10.3148	10.2807	10.355	10.3954	11.3887	11.7578	11.0716	11.3001	11.7245	10.9644	10.5769	10.4739	10.385	10.5395	10.3115	10.39	10.272
ENSDARG00000041400	ndufa3	Turquoise (M1)	9.15461	9.29825	9.28811	9.47667	9.33128	10.3014	10.3263	10.0214	9.86773	10.5959	9.32186	9.30572	9.12062	9.54618	9.25646	8.8077	8.86233	8.91896
ENSDARG00000041421	taz	Turquoise (M1)	8.72307	8.52312	8.64031	8.59048	8.64086	9.33379	8.9113	9.11702	9.01538	9.36192	8.44364	8.7288	8.51155	8.57147	8.53205	8.2723	8.61417	8.8058
ENSDARG00000041449	spred1	Turquoise (M1)	11.4753	11.5818	11.8585	11.4741	11.6417	10.8767	11.006	11.1218	11.3827	10.7711	11.3623	11.5452	11.6062	11.6109	11.4169	11.4538	11.6225	11.5781
ENSDARG00000041481	smg5	Turquoise (M1)	10.7044	10.8682	10.9351	10.8648	10.888	9.85311	9.85981	10.2646	10.2473	9.48818	10.5943	10.8498	10.7499	10.9017	10.7551	10.671	10.7805	10.7593
ENSDARG00000041493	ipo4	Turquoise (M1)	9.71552	9.63887	9.54727	9.72337	9.66381	10.3139	10.7181	10.2437	10.6009	10.0482	9.96576	9.87117	9.59179	9.67993	9.6372	9.59143	9.69475	9.78834
ENSDARG00000041511	pex10	Turquoise (M1)	7.4797	7.20361	7.36935	7.26036	7.33268	6.73792	7.02372	6.75712	6.99181	6.59195	6.87397	7.41116	7.22723	7.38723	7.42653	7.38794	7.3696	7.32412
ENSDARG00000041515	rasal1b	Turquoise (M1)	10.7645	10.8328	10.7114	10.7075	10.7474	9.53911	10.1958	10.0124	10.0297	9.39973	10.173	10.0958	10.8162	10.334	10.5125	10.4983	10.6093	10.5765
ENSDARG00000041530	ppih	Turquoise (M1)	7.75211	7.55392	7.63684	7.6815	7.67571	8.78897	8.87726	8.35691	8.49265	8.92233	8.34165	7.63497	7.55732	7.67618	7.9091	7.50337	7.547	7.93136
ENSDARG00000041533	ccdc130	Turquoise (M1)	7.57309	7.58621	7.35242	7.6385	7.56746	8.23971	8.34983	7.96769	7.92027	8.56332	7.4087	7.38145	7.43109	7.42058	7.67933	7.41651	7.39635	7.74348
ENSDARG00000041538	mrps28	Turquoise (M1)	7.08626	7.37116	7.22785	6.85233	7.17039	7.76718	7.23689	7.45414	7.66169	7.72626	7.18896	7.33569	7.32842	7.39565	7.17038	7.2622	7.11361	7.08703
ENSDARG00000041560	si:dkey-102f14.5	Turquoise (M1)	9.53302	9.65216	9.73008	9.70694	9.66582	8.37325	8.55188	8.75274	8.96735	7.90727	9.1805	9.57926	9.5283	9.5629	9.44513	9.6221	9.68763	9.448
ENSDARG00000041565	tnfaip1	Turquoise (M1)	7.88715	7.5125	7.89705	7.62974	7.73844	8.83304	8.92348	8.44065	8.84862	8.99278	8.53202	8.0462	7.78679	7.68987	7.84715	7.76573	7.90941	7.46252
ENSDARG00000041570	mrpl39	Turquoise (M1)	7.89518	8.33766	8.34631	8.10996	8.1942	8.79195	8.4794	8.93955	8.83083	9.01732	8.62173	8.48423	8.2256	8.3956	8.19026	8.24094	8.15215	8.23518
ENSDARG00000041572	zfpm1	Turquoise (M1)	8.15107	8.194	8.78472	8.76757	8.47207	7.34481	7.30444	7.83211	7.81514	7.03666	8.2735	8.06024	7.92733	8.12656	8.51229	8.52526	8.5566	8.42944
ENSDARG00000041607	eif4ebp3l	Turquoise (M1)	8.10342	7.98691	7.55071	8.43919	8.02265	9.7078	9.62666	9.1146	9.27192	9.55485	8.57591	8.03203	7.57978	7.84465	7.92418	7.1414	7.81399	7.20494
ENSDARG00000041617	nme5	Turquoise (M1)	7.78709	7.77987	7.49793	7.3163	7.61007	8.54222	8.74965	8.62913	8.38692	9.02541	7.64416	7.66599	7.7932	7.93349	7.83921	7.63051	7.60913	7.84052
ENSDARG00000041631	fam192a	Turquoise (M1)	8.63027	8.41564	8.59114	8.70266	8.61615	9.18768	8.97997	9.10975	9.00749	9.35124	8.47252	8.52855	8.52312	8.59699	8.68102	8.57427	8.37304	8.55742
ENSDARG00000041660	oprd1a	Turquoise (M1)	7.94243	8.16239	8.10705	8.32508	8.13734	6.91628	7.02372	7.44639	7.67513	6.95848	8.05193	7.86073	7.89198	8.14648	8.07357	8.12254	7.99305	7.97799
ENSDARG00000041720	arpc5la	Turquoise (M1)	8.52075	8.62311	8.61242	8.36763	8.57399	8.97351	8.92953	8.57372	8.95098	9.04676	8.44364	8.43132	8.41554	8.6812	8.37679	8.40081	8.3995	8.36089
ENSDARG00000041734	tbc1d32	Turquoise (M1)	11.5244	11.3917	11.4935	11.5153	11.4785	9.80971	10.0114	10.3255	10.3652	9.59523	10.6315	11.0666	11.2026	11.1627	11.3096	11.1558	11.2229	11.1835
ENSDARG00000041747	sspn	Turquoise (M1)	6.19873	6.49466	6.15596	6.16991	6.26112	5.49549	5.05716	5.47164	5.61414	5.60232	6.12515	5.96253	5.73304	6.1898	5.78324	6.3799	6.05869	6.07654
ENSDARG00000041791	mgat4c	Turquoise (M1)	10.278	10.3802	10.1083	10.2398	10.2046	8.37325	8.40742	8.69226	8.77299	7.82895	9.52297	9.65337	10.1633	10.1446	9.96914	10.0177	10.3932	10.048
ENSDARG00000041799	cx43	Turquoise (M1)	13.4811	12.7364	13.391	12.8532	13.1343	11.8938	11.177	12.4698	11.683	11.8412	12.0962	13.2466	12.97	13.1733	13.2864	13.263	13.1568	13.1754
ENSDARG00000041802	rnf141	Turquoise (M1)	9.95975	9.82477	9.87041	10.0163	9.94212	8.63813	8.71502	8.83158	9.11181	8.2075	9.19354	9.41855	9.56598	9.75621	9.56006	9.54737	9.5491	9.30189
ENSDARG00000041811	rps25	Turquoise (M1)	10.1833	10.2363	10.1403	10.1347	10.2142	12.3679	12.4959	11.9503	11.9068	12.9565	11.726	11.2367	10.6752	10.6796	10.5038	10.356	10.2227	10.4197
ENSDARG00000041828	si:dkeyp-28d2.4	Turquoise (M1)	4.83168	4.85417	4.82077	4.53257	4.78307	6.39249	6.94067	6.60901	6.70255	6.82594	5.714	5.38679	4.74046	5.41994	5.49117	5.15474	5.27513	5.10688
ENSDARG00000041839	tsc22d2	Turquoise (M1)	10.284	10.3064	10.471	10.3135	10.3587	9.97728	10.0214	10.0058	10.2772	9.95675	10.1034	10.3502	10.3702	10.2934	10.2433	10.3097	10.36	10.2505
ENSDARG00000041875	ube2v1	Turquoise (M1)	9.41851	9.65782	9.50435	9.50547	9.55334	10.2275	10.413	10.0058	10.1881	10.6674	9.80515	9.71798	9.67691	9.63319	9.58151	9.54417	9.43464	9.5742
ENSDARG00000041904	ankzf1	Turquoise (M1)	8.06839	8.23509	8.02989	7.82637	8.05987	8.96562	9.20862	8.42898	8.81281	9.25596	8.4832	8.37265	8.2397	8.30552	8.0668	8.30805	8.45099	8.15641
ENSDARG00000041921	hsbp1b	Turquoise (M1)	8.92012	8.44655	9.0596	9.16685	8.92522	9.71723	9.57744	9.30716	9.79168	10.1329	9.49515	9.07497	8.95145	8.67778	9.04273	8.87722	8.63286	8.79842
ENSDARG00000041926	dlg4a	Turquoise (M1)	12.9802	13.1982	13.2724	13.2357	13.1028	11.0693	11.7822	11.5335	11.5031	10.7056	11.9865	12.515	12.816	12.8681	12.8431	12.8219	13.0649	12.8234
ENSDARG00000041974	brk1	Turquoise (M1)	11.1866	10.9868	11.0478	11.1165	11.111	11.5603	11.6439	11.232	11.4331	11.9938	11.1702	10.957	10.9159	10.8988	11.0118	10.968	10.9395	10.7335
ENSDARG00000041982	adamts6	Turquoise (M1)	7.838	7.73746	7.84988	7.7797	7.77629	6.54735	7.24674	7.01251	6.93635	6.39833	7.74869	8.62276	7.9215	8.19989	8.01848	8.0994	8.37304	8.13308
ENSDARG00000041991	rrp9	Turquoise (M1)	6.78635	6.91379	6.89294	6.74078	6.8493	8.42798	8.64683	7.86144	8.2595	8.52195	7.79534	7.46168	6.89494	7.00126	6.7909	6.85594	6.81326	6.88901
ENSDARG00000042010	pklr	Turquoise (M1)	4.93326	5.18916	5.23972	4.98364	5.10212	6.21695	5.27481	5.91232	5.96869	6.27072	5.15154	5.14045	4.74046	5.24767	5.27911	5.15474	4.50414	4.78628
ENSDARG00000042014	cyp11c1	Turquoise (M1)	4.93326	5.24239	5.23972	5.46137	5.22308	5.74238	5.66905	5.66895	5.44122	6.12915	4.9944	5.48988	5.57289	5.03497	4.91637	5.41341	4.84308	5.2284
ENSDARG00000042018	fhl2a	Turquoise (M1)	5.36201	5.24239	4.96576	5.25359	5.22308	7.32831	6.78552	6.09374	6.96989	7.04747	6.5791	5.27176	5.38481	4.97182	5.00326	5.12431	5.17307	5.2284
ENSDARG00000042032	pou3f3a	Turquoise (M1)	9.26048	9.32697	9.689	8.91093	9.32367	8.80676	8.37225	8.9147	8.67333	7.92474	8.915	9.80632	9.38806	9.62614	9.55525	9.77184	9.40888	9.21873
ENSDARG00000042054	zgc:171971	Turquoise (M1)	9.05468	9.27142	9.14474	9.20247	9.17104	7.93905	7.93305	8.20089	8.48128	7.67889	8.54906	8.78886	9.07951	8.98978	9.16781	9.14434	9.10634	9.16815
ENSDARG00000042056	mau2	Turquoise (M1)	9.57589	9.69866	10.0077	9.61744	9.75139	9.16489	9.26232	9.62209	9.54697	8.80504	9.56204	9.76709	9.58262	9.67481	9.7739	9.86452	9.84953	9.85378
ENSDARG00000042072	fbxl17	Turquoise (M1)	9.46756	9.5258	9.56736	9.20247	9.40517	7.82681	7.98648	8.37729	8.51512	7.47975	8.71827	9.16184	9.44783	9.1509	9.2916	9.67376	9.58788	9.72562
ENSDARG00000042094	eef2a.1	Turquoise (M1)	8.01786	7.87417	7.73114	7.81098	7.87721	9.95754	10.4033	9.51603	9.42984	9.34695	8.95897	8.47031	8.1075	7.98426	8.09369	7.95526	8.09387	8.58771
ENSDARG00000042114	bin1a	Turquoise (M1)	11.3811	11.5613	11.556	11.5497	11.4899	8.82433	9.05107	9.32403	9.48581	8.5854	10.7743	11.0469	11.2907	11.3637	11.4522	11.3398	11.4721	11.3727
ENSDARG00000042115	tmem198a	Turquoise (M1)	10.5612	10.6594	10.6698	10.7702	10.6626	8.91732	9.08399	9.22424	9.398	8.41504	10.002	10.3634	10.2926	10.5167	10.531	10.5476	10.6836	10.6211
ENSDARG00000042120	si:dkey-97o5.1	Turquoise (M1)	8.39655	8.49805	8.25895	8.53093	8.42539	8.9309	8.83919	9.17163	8.78228	9.26053	8.1175	8.37265	8.27664	8.27419	8.54669	8.34784	8.40821	8.20754
ENSDARG00000042122	acot11b	Turquoise (M1)	6.19873	6.64397	6.15596	6.40303	6.34787	7.03382	7.19678	6.52081	7.25819	7.3028	5.9813	6.81585	6.23784	6.28771	6.61162	6.27557	6.21506	5.90845
ENSDARG00000042123	nudt3b	Turquoise (M1)	9.4568	9.55238	9.6225	9.5267	9.53152	7.32831	7.56989	7.54404	7.9809	7.16123	9.36669	9.36324	9.41309	9.48706	9.6073	9.52157	9.5936	9.69817
ENSDARG00000042124	si:dkey-4e7.3	Turquoise (M1)	6.75062	6.67502	6.61866	6.61929	6.66381	8.43181	8.42468	8.16379	7.89757	8.15426	7.57218	6.94477	6.76816	6.82359	6.70421	6.69937	6.53091	6.91711
ENSDARG00000042128	pacsin1b	Turquoise (M1)	8.67742	9.0738	8.99632	8.81441	8.92187	8.43563	8.21236	8.34867	8.38692	8.00359	8.50083	8.7288	8.69987	8.85134	9.02891	9.20505	8.9895	9.20764
ENSDARG00000042133	si:dkey-51e6.1	Turquoise (M1)	6.83826	6.88776	6.72974	6.85233	6.83477	7.05416	6.94067	7.08479	6.94762	7.40661	6.92815	6.77004	6.80744	6.66279	6.91911	6.70724	6.70144	6.57089
ENSDARG00000042138	selp	Turquoise (M1)	4.5503	4.16044	4.16044	4.16044	4.52177	5.94541	5.76389	5.93652	6.36927	6.44944	4.79455	4.85994	5.25234	4.97182	4.54163	4.59788	4.16044	4.52365
ENSDARG00000042214	tmem243a	Turquoise (M1)	5.95768	5.34046	5.65489	6.24435	5.74044	7.4778	7.55419	6.37652	6.99181	7.54928	5.5992	5.42232	6.04613	5.24767	6.31209	5.95629	5.45125	5.93812
ENSDARG00000042232	specc1lb	Turquoise (M1)	8.72307	8.8903	8.74675	8.91093	8.81379	7.43228	7.64589	7.66236	8.12941	7.12093	9.20432	9.09095	9.17775	8.89017	8.80386	8.98977	8.79427	9.13047
ENSDARG00000042236	atrx	Turquoise (M1)	13.6254	13.6147	13.6873	13.6349	13.658	12.9406	13.159	13.2969	13.4934	12.9508	13.4711	13.5317	13.528	13.5702	13.6981	13.7217	13.7544	13.8862
ENSDARG00000042249	FRMD4A	Turquoise (M1)	11.1777	11.4153	11.4607	11.2207	11.3016	9.04517	9.16314	9.52518	9.63324	8.63209	11.4368	11.4342	11.4285	11.4909	11.3982	11.5478	11.6429	11.6402
ENSDARG00000042252	eif4h	Turquoise (M1)	10.7135	10.7291	10.7188	10.6731	10.7312	11.1387	11.1501	10.9274	11.2542	11.404	10.7815	10.5898	10.7782	10.6737	10.6642	10.6636	10.7905	10.6366
ENSDARG00000042259	tgfbr1b	Turquoise (M1)	8.81868	9.02497	9.15443	8.69433	8.91513	7.20701	7.24674	7.89018	7.86868	6.89981	9.49339	9.32128	9.00734	9.09832	8.92078	9.38992	9.10367	9.23247
ENSDARG00000042270	arsa	Turquoise (M1)	9.0618	8.79068	9.02303	9.00139	8.99072	8.20876	7.96889	8.5488	8.43094	7.67199	9.03344	9.28602	9.04788	8.91065	9.03929	9.01466	8.93035	8.84928
ENSDARG00000042272	tmem231	Turquoise (M1)	7.57309	7.4436	7.37774	7.62093	7.48736	8.6046	9.57744	8.42507	8.59816	8.85129	7.98822	7.52409	7.57978	7.3617	7.69703	7.521	7.25722	7.8187
ENSDARG00000042277	efnb3b	Turquoise (M1)	10.501	10.6631	10.7097	10.7189	10.6332	8.98397	9.3752	9.5876	9.80994	8.60354	10.5273	10.1942	10.2676	10.5422	10.5613	10.8265	10.39	10.4728
ENSDARG00000042308	arhgef18b	Turquoise (M1)	9.2037	9.32933	9.59252	9.12104	9.30062	8.08757	8.80996	8.51609	8.60516	7.79765	9.37435	9.393	9.34318	9.2779	9.34555	9.39348	9.49301	9.55683
ENSDARG00000042329	si:dkey-91m11.5	Turquoise (M1)	11.8497	11.7426	12.0218	11.7544	11.8473	10.3885	10.2727	10.6384	10.543	9.62568	11.3521	12.2503	11.8848	11.9524	12.0108	11.9873	12.1649	12.2854
ENSDARG00000042337	chrac1	Turquoise (M1)	7.85457	7.74462	7.61579	7.66446	7.73075	8.34914	8.49583	8.27669	8.14873	8.68755	8.14919	7.73196	7.72108	7.76291	7.57783	7.64663	7.5784	7.86909
ENSDARG00000042338	lpar2a	Turquoise (M1)	5.8893	5.42952	5.65489	5.46137	5.59438	6.97095	7.63101	6.60901	6.54625	7.43959	6.28891	6.14321	5.6717	5.78466	5.53796	5.95629	5.63599	5.2284
ENSDARG00000042341	tmem251	Turquoise (M1)	8.22923	8.16771	8.2724	8.09735	8.22181	8.71238	8.63946	8.32787	8.61212	8.5409	8.14021	8.18498	8.20658	7.96754	8.15241	8.18709	8.19309	7.96482
ENSDARG00000042344	trmt6	Turquoise (M1)	7.89518	8.28485	8.08179	8.28123	8.16036	7.63321	7.70389	7.64218	7.94815	7.18096	8.07569	8.06024	8.12281	8.08068	8.01848	7.93903	8.1625	8.11533
ENSDARG00000042345	si:dkeyp-55f12.3	Turquoise (M1)	7.45808	7.4436	7.40261	7.2021	7.41214	8.04812	7.89629	7.83211	7.81514	8.46354	7.49634	7.31224	7.5268	7.42058	7.22056	7.25693	7.00115	7.11142
ENSDARG00000042383	zbtb25	Turquoise (M1)	7.87095	8.16771	8.22707	8.33047	8.17173	7.34481	7.71098	7.64894	7.70818	6.99253	7.84606	7.83915	7.96182	8.19989	8.36029	8.23829	8.3995	8.27832
ENSDARG00000042387	zgc:77752	Turquoise (M1)	5.02199	5.00613	4.82077	5.12942	5.0344	6.03541	5.63558	5.88763	5.76352	6.56157	4.79455	4.98497	5.38481	4.97182	5.15227	4.95218	4.75298	4.78628
ENSDARG00000042390	syndig1l	Turquoise (M1)	10.8378	10.8714	11.005	11.0398	10.9294	8.44703	8.73244	8.88089	9.07451	8.03073	9.63077	10.136	10.5854	10.5109	10.7093	10.4404	10.8029	10.3721
ENSDARG00000042401	derl2	Turquoise (M1)	8.04696	7.70847	7.65758	7.98549	7.87023	9.14173	9.03713	8.80478	8.63965	9.31652	8.43633	8.06488	7.7932	8.05454	7.79063	7.521	7.81399	7.80397
ENSDARG00000042409	si:ch211-251j10.3	Turquoise (M1)	9.12093	9.21108	9.13008	9.41981	9.21555	7.30318	6.87813	7.28157	7.38687	6.81323	8.73622	9.0448	9.01008	9.18251	9.16781	9.03609	9.15106	8.97891
ENSDARG00000042469	ndufa12	Turquoise (M1)	8.81446	8.89671	8.70445	9.0576	8.90837	9.99418	9.79341	9.88182	9.77009	10.3934	8.75983	8.67524	8.66552	8.85134	8.87128	8.57427	8.43403	8.29417
ENSDARG00000042492	si:dkey-250d21.1	Turquoise (M1)	10.5192	10.4039	10.4367	10.5724	10.4265	8.23971	8.69027	8.61204	8.80676	8.10408	10.5195	10.5507	10.4255	10.3618	10.672	10.4671	10.6391	10.8151
ENSDARG00000042508	ubr3	Turquoise (M1)	11.5892	11.6339	11.7636	11.7139	11.6739	10.7811	10.7754	11.1475	11.135	10.4703	11.2188	11.5053	11.4915	11.4811	11.6153	11.5794	11.742	11.6147
ENSDARG00000042509	glod4	Turquoise (M1)	8.0105	7.73746	7.81344	7.71499	7.84198	8.38516	8.48764	8.34867	8.04423	8.40679	7.81245	7.61602	7.70076	7.55414	7.79063	7.60598	7.55491	7.65587
ENSDARG00000042510	acot20	Turquoise (M1)	7.82964	8.11362	8.03517	8.16533	8.05373	6.63233	7.06904	6.76982	7.36206	6.81323	8.08509	8.07874	8.19697	8.0117	8.10695	7.99973	8.19309	7.97799
ENSDARG00000042518	hipk2	Turquoise (M1)	11.7503	11.9048	12.0337	11.8379	11.8406	9.90764	9.94733	10.4206	10.3927	9.47643	11.7338	11.9171	11.7296	11.9944	11.8215	11.9735	11.762	12.0074
ENSDARG00000042539	ywhaqa	Turquoise (M1)	12.2642	12.3267	12.4375	12.4398	12.4013	13.0124	13.3155	12.9129	13.2127	13.6482	13.1021	12.2827	12.4967	12.5016	12.4267	12.1642	12.389	12.242
ENSDARG00000042555	dym	Turquoise (M1)	9.52532	9.75783	9.74938	9.64358	9.65778	8.90086	8.95645	9.12907	9.41798	8.52956	9.40831	9.50626	9.43566	9.45954	9.53095	9.59556	9.54714	9.58922
ENSDARG00000042571	rnaseh1	Turquoise (M1)	8.37381	8.49383	8.19917	8.26443	8.36729	8.97613	8.79014	8.66933	8.80068	9.29661	8.37263	8.26786	8.27664	8.25597	8.27486	8.29539	8.2181	8.16218
ENSDARG00000042590	rbm19	Turquoise (M1)	8.47876	8.45091	8.18975	8.59943	8.44892	9.08458	9.42099	8.72759	8.99157	9.20466	8.70313	8.34239	8.53077	8.67436	8.58502	8.5339	8.42976	8.84928
ENSDARG00000042608	ica1	Turquoise (M1)	8.44644	8.82466	8.51784	8.57242	8.61199	7.55056	8.00385	8.17782	8.4388	7.71959	8.50083	8.51844	8.5535	8.76074	8.63154	8.74212	8.4552	8.2889
ENSDARG00000042620	gstr	Turquoise (M1)	10.0121	9.7631	9.85712	9.8144	9.90865	9.38201	9.25271	9.17163	8.81884	9.04145	9.93375	9.87645	9.76215	9.93236	9.88732	10.0668	9.87953	9.72173
ENSDARG00000042623	acbd3	Turquoise (M1)	9.96924	9.87746	9.99019	10.1469	10.0178	10.3304	10.845	10.178	10.3266	10.5722	10.0918	9.97071	9.90718	9.83784	9.89305	9.84125	10.0349	9.852
ENSDARG00000042658	acad8	Turquoise (M1)	8.81868	8.67621	8.32065	8.70266	8.6571	8.76187	9.07036	8.988	8.86328	9.32746	8.70313	8.7288	8.68965	8.4646	8.59444	8.53821	8.54085	8.45784
ENSDARG00000042660	fam32a	Turquoise (M1)	9.79451	9.89992	9.70886	9.73558	9.81601	10.2558	10.524	9.91279	9.99684	10.8098	9.88501	9.88433	9.58079	10.2086	9.69519	9.63318	9.52733	9.16241
ENSDARG00000042670	eps15l1a	Turquoise (M1)	11.7519	11.6675	11.7918	11.6791	11.7204	9.82578	10.1564	10.3118	10.4559	9.54738	11.3637	11.5904	11.6819	11.5898	11.721	11.7239	11.7625	11.7349
ENSDARG00000042671	odr4	Turquoise (M1)	8.12404	8.11912	8.14656	8.21282	8.16036	9.13001	8.74623	8.95318	8.78536	8.89904	8.15367	8.0225	7.93892	7.74991	7.88618	7.81997	8.03311	7.86909
ENSDARG00000042677	cadm1b	Turquoise (M1)	10.3896	10.4449	10.5205	10.3629	10.43	8.95502	9.40805	9.31983	9.50462	8.56702	10.2226	9.9345	10.2892	10.3144	10.3499	10.466	10.5594	10.2892
ENSDARG00000042689	zbtb37	Turquoise (M1)	8.76295	8.86767	8.93295	8.94289	8.89132	7.14219	7.21698	7.66236	7.75952	7.07943	8.58915	8.81935	8.94288	8.86939	8.48214	8.65966	8.7436	8.8058
ENSDARG00000042703	parp6a	Turquoise (M1)	10.8574	10.9224	11.0478	11.0763	10.9947	9.00209	9.41884	9.48263	9.71302	8.77655	10.0918	10.8651	10.7016	10.7736	11.0584	10.7587	11.0456	10.8872
ENSDARG00000042723	gfra2a	Turquoise (M1)	9.32401	9.43861	9.56009	9.63709	9.46858	7.08412	7.35078	7.70835	8.02866	7.07943	9.07399	8.77762	9.00185	9.22517	9.02195	9.44128	9.31029	9.30189
ENSDARG00000042725	cebpb	Turquoise (M1)	6.42471	5.58741	5.65489	5.81804	5.83894	10.1817	11.001	10.2101	10.1312	11.2203	8.17141	7.47579	8.4523	7.43697	5.98563	6.06343	5.8235	6.2247
ENSDARG00000042732	tmem189	Turquoise (M1)	9.49673	9.30067	9.0362	9.25148	9.29026	10.2472	10.6447	9.87611	9.88505	10.4977	10.1532	9.28998	9.44378	9.23216	9.17411	9.2555	9.22182	9.46439
ENSDARG00000042737	slc52a3	Turquoise (M1)	4.83168	4.5098	4.73353	4.80149	4.67012	5.62581	6.21452	5.12934	5.61414	6.41559	4.86801	4.70437	4.74046	4.16044	4.16044	4.59788	4.50414	4.16044
ENSDARG00000042742	stx6	Turquoise (M1)	10.5257	10.4062	10.4739	10.4823	10.5058	9.72192	9.96215	9.91419	10.3434	9.72	10.2603	10.3445	10.5614	10.31	10.6166	10.5321	10.3987	10.467
ENSDARG00000042777	ndufa11	Turquoise (M1)	8.61582	8.24014	8.46811	8.50735	8.48578	9.48863	9.62106	9.25755	9.24308	9.97634	8.57591	8.30757	8.37782	8.19989	8.48214	7.99346	8.19309	7.98453
ENSDARG00000042799	atpaf1	Turquoise (M1)	8.6061	8.53959	8.46811	8.53093	8.57399	9.07238	9.17082	8.72123	8.89786	9.30771	8.58915	8.18498	8.3521	8.2787	8.41986	8.32559	8.39073	8.26229
ENSDARG00000042821	agps	Turquoise (M1)	9.1141	9.29825	9.40638	9.13032	9.25072	8.32462	8.78681	8.28965	8.62939	7.82895	9.40271	9.19179	9.24436	9.18011	9.34555	9.39585	9.41105	9.47368
ENSDARG00000042825	rnf169	Turquoise (M1)	9.17445	8.94384	9.31212	9.26838	9.18789	8.6046	8.46279	8.95588	8.56982	8.2075	8.94875	8.99713	8.9908	8.92797	9.03929	9.17226	9.30797	9.01116
ENSDARG00000042839	dph6	Turquoise (M1)	8.14436	8.24518	8.06126	8.21865	8.17173	7.47032	7.33243	7.84978	7.82119	7.46382	8.01306	8.20615	7.86184	8.09614	8.12661	8.26972	8.4552	8.62991
ENSDARG00000042851	srp9	Turquoise (M1)	7.96548	7.86764	7.74412	8.00588	7.92511	8.91459	8.94156	8.57372	8.37467	9.17104	8.21911	7.92867	8.09203	8.10635	7.83123	7.89259	7.654	7.80397
ENSDARG00000042859	slc5a6a	Turquoise (M1)	9.35331	9.22387	9.4205	9.31794	9.29026	7.31998	7.53031	7.7148	7.96462	7.03666	9.36861	8.84113	8.72344	8.88722	9.54315	9.29285	8.95133	9.34553
ENSDARG00000042864	rpl7l1	Turquoise (M1)	8.53106	8.2946	7.93144	8.06535	8.22181	9.989	10.2643	9.56827	9.90359	10.2999	9.14288	8.76058	8.32592	8.26511	8.20265	7.93576	8.2524	8.23518
ENSDARG00000042874	phlda2	Turquoise (M1)	7.99565	8.01671	7.59443	8.29783	8.00367	8.82724	9.03151	8.21456	8.46213	9.23752	8.05193	7.06269	7.31055	7.21706	7.22056	7.10656	7.33313	7.14723
ENSDARG00000042892	paip1	Turquoise (M1)	9.31511	9.31984	9.60141	9.3098	9.40277	9.56545	9.48808	9.55584	9.49148	9.76092	9.33761	9.40948	9.31247	9.2666	9.39486	9.20235	9.39364	9.33028
ENSDARG00000042904	foxo3b	Turquoise (M1)	11.9218	11.9249	11.8157	12.3354	12.0076	10.9337	10.807	11.2286	11.3331	10.4222	11.7003	12.0435	11.8664	12.0888	11.8459	11.8906	12.0126	11.8533
ENSDARG00000042922	gpr173	Turquoise (M1)	10.1183	10.2871	10.3841	10.1254	10.2453	8.52081	8.59443	8.73076	9.08955	7.98706	9.61631	10.1105	10.0993	10.1273	10.2478	10.2939	10.326	10.3584
ENSDARG00000042929	tmem120b	Turquoise (M1)	8.48937	8.35173	8.37567	8.49301	8.42539	7.83844	8.27562	8.13532	8.50018	7.76564	8.1802	8.40595	8.40725	8.34051	8.29815	8.3937	8.37304	8.48569
ENSDARG00000042933	bloc1s6	Turquoise (M1)	8.40779	8.70204	8.74675	9.19365	8.7919	9.76497	9.279	9.37549	8.89216	9.74632	9.03827	8.79166	8.38206	8.41624	8.58028	8.54891	8.5683	8.17366
ENSDARG00000042936	fam228a	Turquoise (M1)	6.44757	5.7884	5.77337	5.94687	5.95872	7.43997	7.25652	7.83802	6.93635	7.75263	6.47942	5.69749	5.99925	5.89278	6.70421	5.95629	6.10537	6.47813
ENSDARG00000042948	dnajc5aa	Turquoise (M1)	11.3319	11.488	11.6168	11.6906	11.5475	10.0096	10.1251	10.2743	10.7159	10.3618	11.2151	11.3131	11.3849	11.6566	11.4702	11.5068	11.5552	11.5586
ENSDARG00000042962	dgcr2	Turquoise (M1)	11.7101	11.8258	11.8864	11.7544	11.6523	14.0526	13.7165	13.8348	13.3815	14.3722	11.1249	11.23	11.4573	11.3967	11.4804	11.6215	11.8169	11.6199
ENSDARG00000043077	nisch	Turquoise (M1)	10.8716	10.9763	11.0016	11.048	10.9859	10.0249	10.2951	10.4019	10.2562	9.77856	10.5178	10.9076	10.8029	11.0461	11.1019	10.865	11.0976	11.0015
ENSDARG00000043084	abhd17ab	Turquoise (M1)	9.25738	9.02497	9.51755	9.14565	9.22374	7.7113	7.95108	8.14487	8.30325	7.38137	9.34347	9.14006	9.34535	9.32005	9.26238	9.26719	9.22675	9.10978
ENSDARG00000043094	gnas	Turquoise (M1)	11.329	11.3533	11.3696	11.4637	11.3763	10.2783	10.2414	10.6265	10.7867	9.92542	11.0415	11.1652	11.1397	11.1923	11.2565	11.2747	11.2666	11.3042
ENSDARG00000043095	kctd6a	Turquoise (M1)	9.32401	9.20594	9.15443	9.30435	9.25605	7.82095	7.59312	8.04633	8.06982	7.50331	8.55245	8.44206	8.89626	8.65367	9.00086	9.00848	9.16139	9.30968
ENSDARG00000043105	qtrt1	Turquoise (M1)	7.18224	7.22439	7.16116	7.2021	7.21554	8.03808	8.11457	7.57988	8.09495	8.14437	7.61189	7.10902	7.39769	7.52383	7.37228	7.07685	7.35148	7.43399
ENSDARG00000043126	blf	Turquoise (M1)	5.10153	4.93424	5.14064	5.12942	5.10212	6.69928	6.4798	7.19131	5.89581	7.40661	5.2421	4.92525	4.97537	4.49531	4.54163	5.02565	5.32222	5.33551
ENSDARG00000043141	si:ch211-132f19.7	Turquoise (M1)	7.55286	7.12835	7.55071	6.16991	7.03816	8.80676	7.80665	8.74022	8.23712	8.99827	7.31525	7.20583	7.66624	7.21706	6.77399	7.07685	7.654	7.61418
ENSDARG00000043177	lsm1	Turquoise (M1)	6.99838	7.07199	6.83245	6.9268	6.98677	7.97634	8.41608	7.57988	7.95915	8.37333	7.2744	7.16266	7.08689	6.81089	6.97901	6.97726	7.23758	7.23846
ENSDARG00000043209	nsun5	Turquoise (M1)	7.32092	7.39876	7.30919	7.19015	7.33268	8.22653	8.41608	8.04122	8.35818	8.47935	7.94755	7.58387	7.62367	7.61288	7.68821	7.44452	7.71877	7.65587
ENSDARG00000043210	nfic	Turquoise (M1)	10.329	10.4783	10.6068	10.304	10.3772	8.96562	9.64147	9.42908	9.5632	9.14653	10.2458	10.5769	10.4669	10.4403	10.5	10.6014	10.7198	10.7412
ENSDARG00000043220	kcnh5a	Turquoise (M1)	9.25428	9.60411	9.6155	9.54992	9.40757	7.39319	7.96298	7.77774	8.55182	7.85351	8.66613	8.42412	8.55725	8.77996	8.95408	9.32677	9.25835	9.40255
ENSDARG00000043226	nfixa	Turquoise (M1)	12.4703	12.6492	12.9338	12.4398	12.559	9.65155	10.0796	10.258	10.4798	9.34479	11.9419	12.5642	12.6209	12.7103	12.8389	12.8302	12.7804	13.0964
ENSDARG00000043238	atg16l2	Turquoise (M1)	7.99565	8.08016	7.89124	8.32508	7.96493	6.57628	6.44503	6.90225	6.54625	6.17123	7.57887	7.63497	7.78679	7.96754	8.17146	8.11391	8.15215	7.85488
ENSDARG00000043241	arrb1	Turquoise (M1)	12.0999	12.0993	12.0454	12.0887	12.0807	9.7528	9.79009	10.3128	10.2562	9.31432	10.9631	11.8123	11.9321	11.8581	11.9585	11.9062	12.115	12.0122
ENSDARG00000043299	nmu	Turquoise (M1)	4.83168	4.76265	4.73353	4.53257	4.67012	7.07421	5.52863	6.25222	7.20323	6.92358	5.40038	4.85994	4.74046	4.16044	4.81693	4.59788	4.75298	4.52365
ENSDARG00000043304	nop2	Turquoise (M1)	8.50515	8.17828	8.22246	8.35711	8.33733	10.0096	10.0043	9.55047	9.84577	10.2639	9.48634	8.80003	8.73673	8.7182	8.34361	8.1733	8.48432	8.33559
ENSDARG00000043317	kita	Turquoise (M1)	9.4568	10.0307	9.91098	9.84851	9.78867	7.96048	8.35884	7.44639	8.32463	7.01477	9.96703	9.44543	9.33229	9.32005	9.73402	10.0076	9.94966	9.24065
ENSDARG00000043332	prkcz	Turquoise (M1)	11.3661	11.1872	11.4573	11.7328	11.4339	9.68236	9.5205	9.98876	10.1396	9.38724	10.8748	10.9804	11.1736	11.2077	11.2289	11.0204	11.1043	11.0612
ENSDARG00000043360	dph3	Turquoise (M1)	6.0536	5.7884	5.65489	6.06336	5.90032	6.93841	6.8523	6.60901	6.90198	7.35567	6.06551	6.06612	6.06892	5.78466	6.01631	5.50037	5.70197	5.52
ENSDARG00000043371	mdh2	Turquoise (M1)	12.0631	11.9056	12.0903	11.9869	12.0415	12.3272	12.5159	12.2724	12.3954	12.5709	12.2517	11.9286	12.0161	12.0087	12.0655	11.8295	11.9283	11.9257
ENSDARG00000043402	zgc:171480	Turquoise (M1)	7.53234	7.43474	7.83177	7.52018	7.60165	8.75577	8.88973	8.31947	8.23712	8.82062	8.07097	7.3201	7.66624	7.79491	7.73179	7.23028	7.44837	7.35494
ENSDARG00000043406	slc8a1b	Turquoise (M1)	13.2338	13.1592	13.2261	13.118	13.1531	11.4135	11.6094	11.7991	11.7679	10.9768	12.6619	13.0081	13.1466	13.059	13.278	13.0913	13.4327	13.3576
ENSDARG00000043417	eipr1	Turquoise (M1)	9.0618	9.20336	9.33787	8.96381	9.1597	9.55672	9.48808	9.43879	9.5524	9.56967	9.24666	9.21489	9.23034	9.13856	9.26533	9.27494	9.27032	9.28616
ENSDARG00000043451	cab39	Turquoise (M1)	10.089	10.185	10.2197	10.2138	10.1739	8.65132	8.48353	8.95046	9.05166	8.23107	9.82762	10.024	9.98155	9.87551	10.0602	10.0816	10.0818	10.1251
ENSDARG00000043460	wu:fj39g12	Turquoise (M1)	10.56	10.8118	10.9103	10.596	10.7587	12.419	12.2181	12.0867	11.9859	12.7946	10.4167	10.0156	10.8923	10.5394	10.9147	10.5724	11.1804	10.6753
ENSDARG00000043466	kcnk3a	Turquoise (M1)	6.65696	6.52931	6.46555	6.19521	6.44882	5.6856	5.52863	5.12934	5.36311	5.66703	6.43431	6.18007	6.06892	6.37876	6.68619	6.88383	6.40989	7.31369
ENSDARG00000043474	atp2b3a	Turquoise (M1)	13.6557	13.6872	13.866	13.6191	13.7184	12.2935	12.485	12.9661	13.0393	12.1763	12.9936	13.3377	13.5324	13.6542	13.482	13.4785	13.6004	13.3454
ENSDARG00000043480	rbbp8	Turquoise (M1)	7.41383	7.65627	7.60159	7.80322	7.61845	8.23093	8.4794	8.26797	7.7532	8.29951	7.65686	7.42578	7.4475	7.38723	7.65236	7.54272	7.83359	7.62262
ENSDARG00000043484	ube2d2	Turquoise (M1)	11.8962	11.7833	11.8252	11.8673	11.8644	12.3117	12.0535	12.1457	12.3777	12.5465	11.937	11.8399	11.9026	11.8772	11.8469	11.7169	11.8079	11.8661
ENSDARG00000043502	ccdc124	Turquoise (M1)	9.92312	9.9607	9.74137	9.97399	9.93715	10.4781	10.4429	10.0883	10.2772	10.7181	10.0953	9.88825	9.73098	9.9295	9.71042	9.73677	9.67868	9.57204
ENSDARG00000043511	prdx6	Turquoise (M1)	9.58827	9.46683	9.56191	9.68403	9.58971	11.6634	11.5046	11.1206	11.0627	11.7955	10.6498	10.212	10.1235	10.0503	9.82474	9.662	9.64046	9.60831
ENSDARG00000043527	plpp6	Turquoise (M1)	7.96548	8.26019	8.27685	7.87155	8.09615	6.67289	6.89087	6.99115	7.31971	6.41559	8.30998	8.06488	7.9955	8.04395	7.99012	8.10231	8.11	8.23518
ENSDARG00000043550	ENKD1	Turquoise (M1)	7.23427	7.48705	7.11149	7.07776	7.24847	6.48755	6.82598	6.99115	6.72912	6.60689	7.13507	7.22274	7.1688	7.24533	7.32731	7.28309	7.33313	7.40486
ENSDARG00000043553	ches1	Turquoise (M1)	9.2197	9.35744	9.54543	9.44975	9.33128	7.50002	7.60078	7.92391	8.04423	7.16123	8.81718	9.06344	9.05054	9.31127	9.17411	9.21716	9.10901	9.343
ENSDARG00000043554	mrpl40	Turquoise (M1)	7.6321	7.65627	7.63684	7.56686	7.65145	8.50998	8.4586	8.2636	8.38285	8.8902	7.96294	7.72019	7.69392	7.69667	7.9091	7.6142	7.49854	7.71224
ENSDARG00000043557	kcnk13b	Turquoise (M1)	6.5139	7.15027	7.04946	6.35962	6.7597	5.34661	4.9217	5.47164	5.61414	5.0944	6.78258	6.30131	6.95421	6.39623	6.38222	7.29856	7.29568	7.02411
ENSDARG00000043559	gle1	Turquoise (M1)	8.93571	8.87741	8.96911	8.69015	8.89474	9.15104	9.23328	9.10731	9.42787	9.35766	8.84778	8.8028	8.95997	8.7015	8.76685	8.6986	8.77421	8.8058
ENSDARG00000043589	ca4a	Turquoise (M1)	8.66344	8.95921	8.59114	8.57242	8.69299	6.98162	7.47296	7.00187	7.30241	6.54611	8.61204	8.37265	8.74003	8.23287	8.65424	8.60535	8.56051	8.74569
ENSDARG00000043593	rapgef1a	Turquoise (M1)	10.7135	10.6556	10.7912	10.7351	10.7042	9.25398	9.58895	9.80284	10.148	9.99017	10.8969	10.9476	10.7942	10.8237	10.7593	10.8088	10.8642	10.7912
ENSDARG00000043608	eif4ebp1	Turquoise (M1)	9.74012	9.75783	9.69731	9.95846	9.80331	10.6634	10.4639	10.2602	10.3937	10.4485	9.8783	10.0048	9.52639	9.87551	9.90821	9.81937	9.91197	9.77713
ENSDARG00000043624	pqlc2	Turquoise (M1)	7.42502	7.42583	7.41081	7.46204	7.44081	8.11169	7.85856	8.31101	8.08495	8.31722	7.51743	7.51046	7.13864	7.17844	7.34997	7.63051	7.33313	7.14723
ENSDARG00000043627	tbc1d9	Turquoise (M1)	10.4984	10.7723	10.9153	10.5553	10.6536	8.28703	8.46279	8.68248	8.85743	7.79765	10.4623	10.5341	10.5854	10.4543	10.6189	10.7536	10.7251	10.6632
ENSDARG00000043631	bcas2	Turquoise (M1)	8.43	8.28973	8.32496	8.50735	8.43484	9.27541	9.30249	8.90912	8.98085	9.57151	8.8228	8.54524	8.54597	8.49982	8.45652	8.37216	8.38191	8.23518
ENSDARG00000043644	vkorc1l1	Turquoise (M1)	9.14459	8.97139	9.22972	9.00812	9.07467	10.1646	9.90959	9.5876	9.70816	10.2898	9.18921	9.0116	8.97967	9.06999	9.01144	9.11875	9.04074	9.171
ENSDARG00000043646	slc6a8	Turquoise (M1)	11.0592	11.2315	11.2555	11.2315	11.1694	9.55497	9.93986	9.81333	10.3085	9.27417	11.0081	10.5207	10.8116	10.7736	10.7811	10.8225	10.7277	10.7697
ENSDARG00000043648	pnck	Turquoise (M1)	5.10153	4.93424	5.14064	5.12942	5.10212	4.48577	4.50403	4.62382	4.62625	4.49568	5.19798	5.09188	4.82872	5.03497	5.39077	4.98981	5.17307	5.03884
ENSDARG00000043661	cadpsa	Turquoise (M1)	11.9731	12.021	12.0616	12.2544	12.0728	10.8056	10.9228	10.67	10.9615	10.0963	11.4091	11.4656	12.0427	11.7361	12.1149	12.1191	12.0953	12.1154
ENSDARG00000043663	faub	Turquoise (M1)	7.51152	7.5782	7.67803	7.23735	7.52352	8.34508	8.21733	7.85562	7.96462	8.49887	7.49634	7.81725	7.20802	7.33568	6.91911	7.62238	7.11361	7.38511
ENSDARG00000043665	glrx5	Turquoise (M1)	8.11033	8.01671	8.08179	7.99232	8.09016	8.43944	8.49174	8.53435	8.32886	8.98727	8.31398	8.10153	8.11262	7.93349	8.12661	7.9713	7.99884	7.74348
ENSDARG00000043728	srek1ip1	Turquoise (M1)	6.0536	6.13337	5.41085	6.09086	5.95872	6.81207	6.91599	6.53592	6.33438	7.13112	6.00289	6.04608	5.95051	6.16929	6.28785	6.27557	6.25643	6.12787
ENSDARG00000043734	trmu	Turquoise (M1)	6.85513	7.26505	6.9622	7.6815	7.20439	8.11646	7.95704	7.52945	7.38687	7.94772	7.4532	7.30433	7.18855	7.21706	7.57783	7.18654	7.30514	7.29261
ENSDARG00000043757	ptbp3	Turquoise (M1)	11.2879	11.324	11.4014	11.2704	11.2984	9.88552	9.78676	10.3181	9.95234	9.77696	10.9833	11.2489	11.1215	11.257	11.2221	11.3014	11.4021	11.2759
ENSDARG00000043799	zmp:0000000619	Turquoise (M1)	9.89551	10.549	10.5373	10.3377	10.2915	8.8185	8.49174	8.97471	8.85743	8.23573	9.12028	9.68378	9.92468	9.87699	10.1539	10.3487	10.1878	10.2573
ENSDARG00000043802	ms4a17a.9	Turquoise (M1)	4.16044	4.76265	4.73353	4.16044	4.52177	7.76108	8.0713	7.23717	8.2595	8.33472	5.47093	5.09188	5.38481	5.81263	4.81693	4.72375	4.92193	4.88126
ENSDARG00000043835	rab3ab	Turquoise (M1)	11.5505	11.5892	11.7373	11.5118	11.6217	7.97107	8.14618	8.33206	8.72242	7.54172	10.7944	11.0065	11.3785	11.3982	11.3217	11.5239	11.5379	11.2573
ENSDARG00000043842	si:ch73-111k22.2	Turquoise (M1)	10.7415	10.768	10.8638	10.8292	10.8203	9.95488	9.90039	10.0994	10.264	10.0429	10.4916	10.7398	10.5511	10.6659	10.6027	10.4155	10.671	10.6242
ENSDARG00000043848	sod1	Turquoise (M1)	9.26973	9.50082	9.27928	9.4046	9.38583	9.99418	10.0714	9.67562	9.43964	10.3447	9.31789	9.19813	9.36045	9.39667	9.45292	9.23976	9.13019	8.98542
ENSDARG00000043857	ufm1	Turquoise (M1)	8.95878	8.66499	8.85778	8.85604	8.86361	9.49412	9.58321	9.13625	9.29587	9.56967	9.16291	9.0116	8.65855	8.90774	8.74164	8.81126	8.7263	8.62574
ENSDARG00000043858	cdk19	Turquoise (M1)	8.15775	8.39767	8.62294	8.44913	8.35737	6.35922	6.23537	6.7443	6.68906	5.94515	7.83494	7.99353	7.92733	8.43659	8.38224	8.58054	8.6104	8.37586
ENSDARG00000043865	timm9	Turquoise (M1)	7.27206	7.31428	6.64729	7.29419	7.13555	8.5668	8.65417	8.19171	8.3415	9.12662	7.78959	7.10902	7.22723	7.41232	7.46849	6.97079	6.95349	7.0622
ENSDARG00000043877	mmachc	Turquoise (M1)	5.56721	5.95976	5.37081	5.25359	5.5134	6.21695	6.78552	6.09374	6.64778	7.2004	6.02412	5.69749	5.34264	5.91834	5.53796	5.72557	6.03468	5.52
ENSDARG00000043884	nup43	Turquoise (M1)	7.85457	7.67138	7.73114	7.6472	7.7537	8.50271	8.6505	8.40535	8.48508	8.9734	7.97816	7.80059	7.90977	7.79491	7.80701	7.51661	7.74663	7.77405
ENSDARG00000043898	timm10b	Turquoise (M1)	7.22145	6.83418	7.09112	6.9268	7.03816	7.91181	7.67519	7.56565	7.81514	8.12939	7.21514	7.09988	6.89494	7.13873	7.09156	6.66739	7.1666	7.1354
ENSDARG00000043904	pnrc1	Turquoise (M1)	8.56155	8.93764	9.11774	8.73953	8.84601	6.72516	6.95284	7.2551	7.51231	6.48245	8.61204	8.7491	8.29025	9.08294	8.80792	8.78617	9.08209	8.62991
ENSDARG00000043905	rnf14	Turquoise (M1)	8.776	8.87417	8.92163	9.06407	8.92187	9.47201	9.83103	9.07279	9.55601	9.43252	9.22988	8.78886	8.97126	8.73799	8.92078	8.72525	8.80419	8.8564
ENSDARG00000043932	stmn4l	Turquoise (M1)	10.5861	10.5722	10.5989	10.6561	10.6393	11.3773	12.5506	11.442	11.9047	12.218	10.5004	9.63481	10.3819	10.1956	10.0206	10.3165	9.87953	10.1044
ENSDARG00000043960	rpf2	Turquoise (M1)	8.11033	8.2946	8.2724	8.03262	8.19977	9.03766	9.14505	9.03743	8.91766	9.33398	8.58255	8.25979	8.0972	7.95628	7.86289	7.53407	7.76036	8.07917
ENSDARG00000044034	tmem86a	Turquoise (M1)	10.2092	10.0581	10.2035	10.293	10.1426	7.04403	6.98873	7.41493	7.51979	6.56157	10.2747	10.3378	9.70589	9.81632	9.95095	10.0526	10.094	9.90955
ENSDARG00000044044	rassf2b	Turquoise (M1)	5.77878	5.65845	5.77337	5.36297	5.66978	6.29003	6.70082	6.89072	6.38637	6.88777	6.00289	5.80089	5.87354	5.66549	5.39077	5.50037	5.45125	5.90845
ENSDARG00000044053	vsnl1b	Turquoise (M1)	13.1132	13.167	13.1824	13.2156	13.2123	11.1375	11.0448	11.4936	11.6085	10.7444	12.3175	12.5409	12.91	13.0516	12.8441	12.8477	13.1152	12.9107
ENSDARG00000044083	peli1b	Turquoise (M1)	8.36231	8.44218	8.54761	8.49301	8.46746	7.59248	7.63101	7.91835	8.07992	7.3028	8.51824	8.68732	8.48815	8.51903	8.7543	8.76981	8.6513	8.84928
ENSDARG00000044102	znf593	Turquoise (M1)	7.36814	7.52088	7.09112	7.52018	7.39269	8.50998	8.43324	8.07661	8.46598	9.03613	8.00317	7.40379	7.43932	7.30918	7.17038	6.9901	7.30514	6.99813
ENSDARG00000044144	wapla	Turquoise (M1)	10.3538	10.4106	10.4167	10.4919	10.4099	9.7905	9.98264	10.0266	10.0179	9.31212	10.31	10.2099	10.3215	10.2945	10.3261	10.2721	10.3878	10.3152
ENSDARG00000044167	padi2	Turquoise (M1)	6.83826	6.45909	7.11149	7.34882	6.93341	7.93364	7.79337	8.32368	8.55543	8.05207	7.74869	7.38894	7.21766	7.07696	6.97901	7.00915	6.5796	6.64075
ENSDARG00000044179	rbms2a	Turquoise (M1)	9.29411	9.13192	8.92163	9.34476	9.16255	9.49595	9.23816	9.5806	9.68691	9.81009	9.14288	9.17261	9.25824	9.03844	9.09009	9.17226	9.07392	8.98866
ENSDARG00000044194	tcta	Turquoise (M1)	9.04033	8.97139	8.76269	9.0511	8.99392	9.38399	9.132	9.275	9.29587	9.69488	8.80589	8.77762	8.77267	8.6812	8.78342	8.67341	8.94536	8.74953
ENSDARG00000044225	si:dkey-27b3.2	Turquoise (M1)	9.16456	9.26649	9.49485	9.28232	9.33884	8.86735	8.76327	9.05774	9.17894	8.43949	9.26119	9.38931	9.15071	9.1509	9.17411	9.22917	9.22675	9.08877
ENSDARG00000044281	erbin	Turquoise (M1)	11.7298	11.6496	11.6429	11.836	11.7156	11.3649	11.1853	11.3798	11.1064	11.1125	11.4937	11.6601	11.5917	11.6878	11.6066	11.6717	11.535	11.6031
ENSDARG00000044298	phax	Turquoise (M1)	8.76732	8.55182	8.55496	8.62155	8.66114	8.96298	8.78681	8.74962	8.94823	9.10643	8.6441	8.80003	8.51155	8.61851	8.58974	8.63376	8.7436	8.76096
ENSDARG00000044301	atf1	Turquoise (M1)	8.97017	8.79068	8.83986	9.03472	8.92857	9.52487	10.2107	9.15993	9.60563	9.58433	9.33761	8.88633	8.95145	8.86939	8.76268	8.78978	8.79427	8.75716
ENSDARG00000044365	angptl3	Turquoise (M1)	7.40254	7.69375	7.24634	7.23735	7.41214	8.40478	8.57138	7.5147	7.43523	8.40679	7.72478	7.15386	7.13864	6.95607	6.97901	7.75091	7.09183	7.2162
[truncated: 9,657 more rows]
