# Supplementary material for: Brain Regeneration Resembles Brain Cancer at Its Early Wound Healing Stage and Diverges From Cancer Later at Its Proliferation and Differentiation Stages
Source: Front Cell Dev Biol. 2022 Feb 10;10:813314. doi: 10.3389/fcell.2022.813314 (PMC8868567; doi:10.3389/fcell.2022.813314)
Supplement: Supplementary file 9 [file Table7.XLSX]

## Sheet: Orthologs
Supplementary Table 7: All DEGs of three stages of zebrafish brain regeneration and their human orthologs.
ZebrafishID	HumanID	ZebrafishName	HumanName	log2FC.1dpl	padj.1dpl	log2FC.3dpl	padj.3dpl	log2FC.14dpl	padj.14dpl	log2FC.LGG	padj.LGG	log2FC.GBM	padj.GBM	Type	Target %id	Query %id	GOC Score	WGA Cov.	High Conf.	Status
ENSDARG00000000018	ENSG00000106459	nrf1	NRF1	0.631047	0.00605859	NA	NA	NA	NA	NA	NA	NA	NA	ortholog_one2one	90.0596	89.881	50	100	1	ortholog
ENSDARG00000000069	ENSG00000112977	dap	DAP	1.03394	7.29169e-05	NA	NA	NA	NA	NA	NA	1.49348	1.2922e-14	ortholog_one2one	61.7647	60	75	54.91	1	ortholog
ENSDARG00000000086	ENSG00000205726	itsn1	ITSN1	-1.78462	0.00761714	NA	NA	NA	NA	NA	NA	-1.44445	2.47835e-07	ortholog_one2one	76.9901	76.9454	25	85.53	1	ortholog
ENSDARG00000000142	ENSG00000151881	tmem267	TMEM267	-1.67603	0.0277103	NA	NA	NA	NA	NA	NA	0.648153	0.0187181	ortholog_one2one	66.5116	60.8511	0	95.64	1	ortholog
ENSDARG00000000189	ENSG00000143434	sema6e	SEMA6C	-1.05457	2.08277e-05	NA	NA	NA	NA	NA	NA	NA	NA	ortholog_one2many	45.8064	40.0376	50	5.48	1	ortholog
ENSDARG00000000324	ENSG00000132716	dcaf8	DCAF8	-0.757006	0.0149841	NA	NA	NA	NA	NA	NA	NA	NA	ortholog_one2many	63.9866	62.9325	0	82.4	1	ortholog
ENSDARG00000000349	ENSG00000137691	cfap300	CFAP300	NA	NA	3.08243	2.16447e-06	NA	NA	1.88847	0.0426961	2.66901	0.000717277	ortholog_one2one	41.9476	41.1765	75	55.81	1	ortholog
ENSDARG00000000503	ENSG00000099365	stx1b	STX1B	-0.682121	0.00170288	NA	NA	NA	NA	-2.53199	0.000241913	-4.16624	1.10481e-14	ortholog_one2one	96.875	96.875	0	96.56	1	ortholog
ENSDARG00000000606	ENSG00000115423	dnah6	DNAH6	NA	NA	0.609136	0.000548436	NA	NA	NA	NA	-1.69049	0.0236225	ortholog_one2one	70.202	70.1177	0	89.11	1	ortholog
ENSDARG00000000656	ENSG00000240065	psmb9a	PSMB9	NA	NA	5.05105	0.0459502	NA	NA	1.81802	0.00322754	2.69149	5.76801e-09	ortholog_one2one	60.274	60.5505	25	91.32	1	ortholog
ENSDARG00000000690	ENSG00000143028	sypl2b	SYPL2	3.19506	1.04458e-11	2.93318	1.67471e-09	0.863929	0.00684288	NA	NA	NA	NA	ortholog_one2many	39.7059	46.5517	50	9.9	1	ortholog
ENSDARG00000000767	ENSG00000066336	spi1b	SPI1	4.07497	5.89963e-18	3.86745	6.57021e-19	1.54419	9.94799e-07	NA	NA	1.67792	0.000156607	ortholog_one2one	54.0741	49.3243	25	59.62	1	ortholog
ENSDARG00000000796	ENSG00000123358	nr4a1	NR4A1	-3.07274	1.08659e-05	-3.13725	8.75477e-20	-2.17452	3.8528e-07	NA	NA	NA	NA	ortholog_one2one	56.3545	58.7108	25	98.53	1	ortholog
ENSDARG00000000906	ENSG00000005020	skap2	SKAP2	3.38207	8.80843e-10	3.27524	5.73276e-12	1.152	0.00397282	NA	NA	NA	NA	ortholog_one2one	57.6602	60.7038	25	58.96	1	ortholog
ENSDARG00000000935	ENSG00000132478	unk	UNK	-0.82787	0.0150845	NA	NA	NA	NA	0.815978	0.00284414	NA	NA	ortholog_one2one	56.9136	59.3308	25	75.09	1	ortholog
ENSDARG00000001014	ENSG00000100345	myh9b	MYH9	NA	NA	1.21437	0.000184745	NA	NA	NA	NA	NA	NA	ortholog_one2many	71.9898	80.6747	25	84.27	1	ortholog
ENSDARG00000001015	ENSG00000126746	znf384l	ZNF384	-0.731288	0.0196937	NA	NA	NA	NA	NA	NA	NA	NA	ortholog_one2many	51.6447	53.8593	0	74.65	1	ortholog
ENSDARG00000001127	ENSG00000091664	slc17a6a	SLC17A6	-1.8274	0.0260774	NA	NA	NA	NA	-3.34183	0.0127119	-3.93836	0.000542748	ortholog_one2many	85.567	84.8382	50	31.83	1	ortholog
ENSDARG00000001210	ENSG00000152219	arl14ep	ARL14EP	0.766081	0.0082819	NA	NA	NA	NA	NA	NA	NA	NA	ortholog_one2one	29.6154	34.375	0	31.64	0	ortholog
ENSDARG00000001220	ENSG00000005810	mycbp2	MYCBP2	-0.814283	0.0120599	NA	NA	NA	NA	-1.55531	0.000518367	-2.77798	1.07183e-23	ortholog_one2one	84.4164	86.3358	75	97.46	1	ortholog
ENSDARG00000001303	ENSG00000204264	psmb8a	PSMB8	NA	NA	4.57163	0.0463268	NA	NA	1.69717	0.00114238	2.80619	2.37225e-12	ortholog_one2one	65.5797	66.7897	50	81.53	1	ortholog
ENSDARG00000001558	ENSG00000237649	kifc1	KIFC1	NA	NA	2.70725	1.14723e-10	1.35945	0.000314189	4.57936	9.86278e-07	5.32845	4.68201e-29	ortholog_one2one	40.5646	44.1748	25	43.7	0	ortholog
ENSDARG00000001621	ENSG00000001167	nfyal	NFYA	NA	NA	0.659675	0.027013	NA	NA	NA	NA	NA	NA	ortholog_one2many	71.4697	73.8095	0	82.66	1	ortholog
ENSDARG00000001676	ENSG00000046653	gpm6bb	GPM6B	-2.3789	0.0032695	NA	NA	NA	NA	NA	NA	NA	NA	ortholog_one2one	66.4634	81.3433	100	90.6	1	ortholog
ENSDARG00000001686	ENSG00000198276	uckl1a	UCKL1	NA	NA	-0.95861	0.000331812	NA	NA	0.710781	0.0293342	NA	NA	ortholog_one2many	71.7153	73.7336	25	88.18	1	ortholog
ENSDARG00000001710	ENSG00000137312	flot1a	FLOT1	-0.916832	0.00904243	NA	NA	NA	NA	NA	NA	NA	NA	ortholog_one2many	78.9227	76.9406	0	92.98	1	ortholog
ENSDARG00000001754	ENSG00000188976	noc2l	NOC2L	1.29166	0.0216923	NA	NA	NA	NA	NA	NA	NA	NA	ortholog_one2one	55.4072	55.1862	50	64.42	1	ortholog
ENSDARG00000001767	ENSG00000174669	slc29a2	SLC29A2	NA	NA	2.45317	1.34244e-12	1.48651	1.02553e-06	NA	NA	NA	NA	ortholog_one2many	50.4386	51.1111	0	68.32	1	ortholog
ENSDARG00000001769	ENSG00000132670	ptpra	PTPRA	-1.40489	0.0362349	NA	NA	NA	NA	NA	NA	NA	NA	ortholog_one2one	75.9352	73.2852	25	80.32	1	ortholog
ENSDARG00000001776	ENSG00000109689	stim2b	STIM2	-1.02572	0.0482103	NA	NA	NA	NA	NA	NA	NA	NA	ortholog_one2many	58.9812	60.5227	75	54.45	1	ortholog
ENSDARG00000001781	ENSG00000110900	tspan11	TSPAN11	-1.85164	0.00296289	NA	NA	NA	NA	2.86274	4.1571e-08	1.84289	6.40082e-05	ortholog_one2one	67.1937	66.9291	0	100	1	ortholog
ENSDARG00000001782	ENSG00000165059	prkacba	PRKACG	3.46577	0.00540437	2.51863	0.000310237	NA	NA	NA	NA	NA	NA	ortholog_many2many	71.7949	63.7975	0	72.82	1	ortholog
ENSDARG00000001788	ENSG00000241837	atp5po	ATP5PO	1.08642	0.000198623	NA	NA	NA	NA	NA	NA	NA	NA	ortholog_one2many	60.0939	61.244	25	79.92	1	ortholog
ENSDARG00000001835	ENSG00000102452	nalcn	NALCN	-0.801113	0.029412	NA	NA	NA	NA	NA	NA	-3.09476	6.66396e-10	ortholog_one2one	90.2186	90.0115	50	98.93	1	ortholog
ENSDARG00000001857	ENSG00000072364	aff4	AFF4	-1.55646	0.0205816	NA	NA	NA	NA	NA	NA	NA	NA	ortholog_one2one	57.4377	61.6805	50	76.79	1	ortholog
ENSDARG00000001873	ENSG00000092621	phgdh	PHGDH	NA	NA	1.32898	4.27542e-08	NA	NA	1.23993	0.00613073	NA	NA	ortholog_one2one	59.6623	60.2273	0	75.35	1	ortholog
ENSDARG00000001881	ENSG00000167535	cacnb3a	CACNB3	-2.39602	8.33902e-06	NA	NA	NA	NA	-2.46694	0.000128647	-2.38648	2.62019e-12	ortholog_one2many	61.7769	68.894	25	63.49	1	ortholog
ENSDARG00000001888	ENSG00000285542	ppm1ba		-1.41636	0.00184038	NA	NA	NA	NA	NA	NA	NA	NA	ortholog_one2many	75.7812	74.6154	100	97.81	1	ortholog
ENSDARG00000001933	ENSG00000106617	prkag2b	PRKAG2	NA	NA	2.1159	0.000766449	NA	NA	NA	NA	-1.40536	1.10683e-05	ortholog_one2many	64.1476	68.4803	25	48.16	0	ortholog
ENSDARG00000001940	ENSG00000136770	dnajc1	DNAJC1	1.15402	0.00266852	NA	NA	NA	NA	0.942959	0.0098768	0.833065	0.00115524	ortholog_one2one	57.0397	60.076	25	78.46	1	ortholog
ENSDARG00000001953	ENSG00000170525	pfkfb3	PFKFB3	NA	NA	-0.646452	0.000222973	-1.01133	5.09464e-07	NA	NA	NA	NA	ortholog_one2one	73.6538	71.4552	100	86.44	1	ortholog
ENSDARG00000002002	ENSG00000071282	lmcd1	LMCD1	3.15595	3.8332e-13	1.90627	1.21917e-10	0.586013	0.0172201	NA	NA	1.07499	0.0098752	ortholog_one2one	52.3288	55.848	0	49.28	0	ortholog
ENSDARG00000002013	ENSG00000106070	grb10a	GRB10	NA	NA	-0.649951	0.000441169	-0.591269	0.00378668	NA	NA	NA	NA	ortholog_one2many	70.202	69.2691	0	93.81	1	ortholog
ENSDARG00000002020	ENSG00000164327	rictorb	RICTOR	-0.824446	0.00829279	NA	NA	NA	NA	NA	NA	-1.18844	8.15621e-05	ortholog_one2many	73.3021	73.7338	0	91.19	1	ortholog
ENSDARG00000002037	ENSG00000123836	pfkfb2b	PFKFB2	NA	NA	-0.619602	9.77478e-05	NA	NA	NA	NA	NA	NA	ortholog_one2many	78.0198	71.8978	0	90.87	1	ortholog
ENSDARG00000002071	ENSG00000035687	adss2	ADSS2	-1.67485	0.017231	NA	NA	NA	NA	-0.960837	0.00104249	-1.03815	1.40405e-08	ortholog_one2one	82.2368	82.4176	75	60.32	1	ortholog
ENSDARG00000002084	ENSG00000172037	lamb2	LAMB2	NA	NA	0.903979	0.00065893	NA	NA	1.36061	0.00305211	1.89072	3.05937e-09	ortholog_one2one	59.2325	59.7643	0	92.24	1	ortholog
ENSDARG00000002165	ENSG00000092010	psme1	PSME1	3.78332	1.82216e-22	3.91414	5.77519e-49	1.14148	1.41864e-06	1.04799	0.000610595	1.36155	6.28834e-05	ortholog_one2one	57.4297	57.6613	0	72.77	1	ortholog
ENSDARG00000002167	ENSG00000067191	cacnb1	CACNB1	-1.29391	0.0261308	NA	NA	NA	NA	-2.59327	1.86923e-05	-3.33315	5.78218e-21	ortholog_one2one	75.2508	74.6269	25	88.53	1	ortholog
ENSDARG00000002190	ENSG00000083937	chmp2bb	CHMP2B	1.19788	2.63782e-05	NA	NA	NA	NA	NA	NA	NA	NA	ortholog_one2many	84.0376	83.6449	0	94.8	1	ortholog
ENSDARG00000002196	ENSG00000156273	bach1b	BACH1	2.68885	4.07479e-08	1.96536	5.73321e-08	0.790383	0.00506585	0.867505	0.00461796	0.878504	0.000956304	ortholog_one2many	30.8424	35.9177	50	26.76	1	ortholog
ENSDARG00000002210	ENSG00000115694	stk25a	STK25	NA	NA	-0.744121	0.0021897	-0.743603	0.00279869	-0.618699	0.00237765	-0.739155	1.34417e-06	ortholog_one2many	77.9343	78.8599	100	80.53	1	ortholog
ENSDARG00000002213	ENSG00000119509	invs	INVS	2.07981	0.0188158	1.26045	0.00222676	NA	NA	NA	NA	NA	NA	ortholog_one2one	51.4554	53.4634	75	53.51	1	ortholog
ENSDARG00000002215	ENSG00000137996	rtca	RTCA	0.792801	0.00261473	NA	NA	NA	NA	-0.886175	0.00195769	NA	NA	ortholog_one2one	74.0437	74.6556	100	87.22	1	ortholog
ENSDARG00000002231	ENSG00000141934	plpp2a	PLPP2	NA	NA	1.4732	0.00598764	NA	NA	NA	NA	-2.45719	0.000181092	ortholog_one2many	61.8056	62.0209	25	75.32	1	ortholog
ENSDARG00000002235	ENSG00000157227	mmp14a	MMP14	NA	NA	2.47199	2.02354e-05	1.19122	0.0289462	2.03643	0.00899379	3.81567	6.57344e-14	ortholog_one2many	65.4639	66.3763	0	92.6	1	ortholog
ENSDARG00000002240	ENSG00000142507	psmb6	PSMB6	1.2976	0.000408693	NA	NA	NA	NA	NA	NA	NA	NA	ortholog_one2one	72.3849	74.569	0	86.39	1	ortholog
ENSDARG00000002241	ENSG00000177301	kcna2a	KCNA2	-1.10384	0.0264196	-0.736372	0.00204799	NA	NA	-1.77652	0.00985431	-2.88998	2.17039e-09	ortholog_one2many	87.5751	88.641	0	100	1	ortholog
ENSDARG00000002249	ENSG00000059377	tbxas1	TBXAS1	-0.689465	0.0258882	NA	NA	NA	NA	NA	NA	1.31455	0.00397474	ortholog_one2one	47.6548	46.5201	25	64.57	1	ortholog
ENSDARG00000002298	ENSG00000152766	ankrd22	ANKRD22	1.22212	0.0133744	NA	NA	NA	NA	NA	NA	2.39893	0.000120103	ortholog_one2one	51.8325	51.8325	100	65.95	1	ortholog
ENSDARG00000002304	ENSG00000131153	gins2	GINS2	2.05745	0.00754427	3.53596	7.32132e-15	1.3106	0.0393955	1.87908	0.00769397	3.07447	1.39119e-13	ortholog_one2one	77.8378	79.1209	50	95.24	1	ortholog
ENSDARG00000002365	ENSG00000139624	cers5	CERS5	1.13036	0.0123289	NA	NA	NA	NA	NA	NA	0.746716	0.000351919	ortholog_one2one	69.3878	70.2842	0	63.75	1	ortholog
ENSDARG00000002377	ENSG00000177427	mief2	MIEF2	-0.993371	0.000451071	NA	NA	NA	NA	-0.771374	9.49212e-05	-0.835862	0.00021461	ortholog_one2one	22.2467	37.1324	0	76.42	0	ortholog
ENSDARG00000002401	ENSG00000117308	gale	GALE	2.07644	4.61251e-08	0.853149	0.0170563	NA	NA	NA	NA	NA	NA	ortholog_one2one	71.5517	71.1429	25	95.48	1	ortholog
ENSDARG00000002403	ENSG00000137804	nusap1	NUSAP1	NA	NA	2.06222	1.10495e-07	NA	NA	3.96212	1.52184e-05	5.28557	4.27556e-36	ortholog_one2many	33.5601	33.1839	75	28.83	1	ortholog
ENSDARG00000002406	ENSG00000004838	zmynd10	ZMYND10	NA	NA	1.81286	0.00282315	NA	NA	NA	NA	2.64005	0.00054697	ortholog_one2one	55.2273	54.2411	0	79.84	1	ortholog
ENSDARG00000002463	ENSG00000183111	arhgef37	ARHGEF37	-1.3615	0.0151381	NA	NA	NA	NA	NA	NA	-1.87601	5.78929e-05	ortholog_one2one	37.9259	36.1072	25	42.7	0	ortholog
ENSDARG00000002479	ENSG00000186871	ercc6l	ERCC6L	NA	NA	2.69198	1.30193e-12	0.984626	0.000265191	2.23354	0.0118762	3.8191	1.14615e-15	ortholog_one2one	46.56	40.1103	0	53.62	1	ortholog
ENSDARG00000002487	ENSG00000173145	noc3l	NOC3L	0.771869	0.00869815	NA	NA	NA	NA	0.904786	0.00013096	NA	NA	ortholog_one2one	66.75	66.75	50	83.35	1	ortholog
ENSDARG00000002494	ENSG00000115221	itgb6	ITGB6	4.06572	0.000686453	3.12798	1.91892e-06	1.51152	0.0129266	2.26046	0.0118264	NA	NA	ortholog_one2one	58.3756	58.8235	75	51.5	1	ortholog
ENSDARG00000002552	ENSG00000162889	mapkapk2a	MAPKAPK2	0.756073	0.0012847	NA	NA	NA	NA	1.1846	6.68459e-05	1.15569	2.00572e-07	ortholog_one2many	79.25	82.9843	50	86.52	1	ortholog
ENSDARG00000002564	ENSG00000100321	syngr1a	SYNGR1	-1.57711	0.0278886	NA	NA	NA	NA	-2.3913	5.67439e-05	-3.72367	2.51107e-26	ortholog_one2many	62.6609	65.4709	0	78.75	1	ortholog
ENSDARG00000002571	ENSG00000138594	tmod2	TMOD3	-1.79209	0.00625353	NA	NA	NA	NA	NA	NA	0.616836	0.0135481	ortholog_one2one	70.4545	72.093	25	61.66	1	ortholog
ENSDARG00000002582	ENSG00000092607	tbx15	TBX15	NA	NA	NA	NA	1.18741	0.0212957	2.31311	0.00244798	3.50337	1.21468e-11	ortholog_one2one	79.5681	77.2581	100	100	1	ortholog
ENSDARG00000002591	ENSG00000175792	ruvbl1	RUVBL1	0.785885	0.00563928	NA	NA	NA	NA	0.925424	0.000157772	1.3362	2.17839e-11	ortholog_one2one	92.3246	92.3246	25	100	1	ortholog
ENSDARG00000002600	ENSG00000175426	pcsk1	PCSK1	-2.15684	0.0036015	NA	NA	NA	NA	-2.56756	0.0274979	-1.81461	0.0174743	ortholog_one2one	72.51	72.3179	75	93.25	1	ortholog
ENSDARG00000002613	ENSG00000106399	rpa3	RPA3	1.5967	0.000846593	0.824422	0.00436594	NA	NA	NA	NA	1.45912	8.59899e-06	ortholog_one2one	57.0248	57.0248	50	0	1	ortholog
ENSDARG00000002632	ENSG00000122359	anxa11b	ANXA11	NA	NA	0.815164	5.31157e-05	NA	NA	-1.63497	0.00177478	-1.61042	2.65676e-07	ortholog_one2many	57.6238	60	0	63.65	1	ortholog
ENSDARG00000002634	ENSG00000086062	b4galt1	B4GALT1	NA	NA	2.67047	3.95616e-05	NA	NA	NA	NA	1.65479	0.00227791	ortholog_one2one	39.4472	54.8951	25	45.7	0	ortholog
ENSDARG00000002644	ENSG00000143248	rgs5a	RGS5	NA	NA	-0.94006	2.40439e-07	NA	NA	NA	NA	NA	NA	ortholog_one2one	70.7182	70.3297	0	91.79	1	ortholog
ENSDARG00000002656	ENSG00000164506	stxbp5a	STXBP5	-0.640089	0.03253	-0.677551	0.000372227	NA	NA	-2.2939	0.000108531	-3.40211	1.99376e-20	ortholog_one2many	81.7937	80.8511	100	97.49	1	ortholog
ENSDARG00000002682	ENSG00000154114	tbcela	TBCEL	NA	NA	-0.586434	3.95954e-05	NA	NA	NA	NA	NA	NA	ortholog_many2many	25.7075	61.9318	0	90.51	1	ortholog
ENSDARG00000002690	ENSG00000183155	rabif	RABIF	1.31735	0.0462725	NA	NA	NA	NA	-0.605798	0.0135581	NA	NA	ortholog_one2one	66.6667	62.1212	25	85.97	1	ortholog
ENSDARG00000002701	ENSG00000103710	rasl12	RASL12	1.27533	0.0036395	1.61689	0.000140436	1.09431	5.55175e-08	1.58875	0.0467089	1.18115	0.0462934	ortholog_one2one	63.5338	66.2745	50	86.42	1	ortholog
ENSDARG00000002720	ENSG00000164338	utp15	UTP15	1.32973	3.59249e-06	0.703418	0.00185471	NA	NA	NA	NA	NA	NA	ortholog_one2one	55.7915	55.8994	0	54.66	1	ortholog
ENSDARG00000002791	ENSG00000163399	atp1a1a.1	ATP1A1	-0.632352	0.0343766	NA	NA	NA	NA	-1.44163	0.00144797	-0.924031	0.00157514	ortholog_one2many	89.3451	88.9105	0	96.51	1	ortholog
ENSDARG00000002816	ENSG00000113319	rasgrf2b	RASGRF2	-3.03052	6.53953e-07	-0.762433	0.00145249	NA	NA	-2.48064	0.00212535	-4.13357	6.51311e-22	ortholog_one2many	83.5893	83.119	25	93.49	1	ortholog
ENSDARG00000002826	ENSG00000183137	cep57l1	CEP57L1	NA	NA	1.10695	0.00767132	0.835282	0.0420143	NA	NA	NA	NA	ortholog_one2one	38.2609	35.6275	50	40.73	1	ortholog
ENSDARG00000002830	ENSG00000099899	trmt2a	TRMT2A	0.843264	0.0119504	NA	NA	NA	NA	NA	NA	NA	NA	ortholog_one2one	54.4	54.9273	0	86.97	1	ortholog
ENSDARG00000002880	ENSG00000004766	vps50	VPS50	-0.801562	0.0461465	NA	NA	NA	NA	NA	NA	NA	NA	ortholog_one2many	84.3361	84.2487	50	95.16	1	ortholog
ENSDARG00000002909	ENSG00000105289	tjp3	TJP3	6	0.0387558	NA	NA	NA	NA	NA	NA	-1.93454	0.000892989	ortholog_one2one	44.1785	32.3506	0	33.66	0	ortholog
ENSDARG00000002916	ENSG00000075826	sec31b	SEC31B	-1.31291	0.00670009	NA	NA	NA	NA	NA	NA	NA	NA	ortholog_one2one	47.8372	48.164	50	45.64	1	ortholog
ENSDARG00000002952	ENSG00000128602	smo	SMO	NA	NA	1.16974	2.93289e-05	0.91792	0.000414217	2.1883	1.56598e-06	2.82881	1.37925e-18	ortholog_one2one	68.3609	65.4501	0	91.61	1	ortholog
ENSDARG00000002967	ENSG00000106244	pdap1b	PDAP1	1.10656	0.000756717	NA	NA	NA	NA	NA	NA	NA	NA	ortholog_one2one	67.4033	68.5393	50	50.39	1	ortholog
ENSDARG00000002986	ENSG00000119125	gda	GDA	2.42338	0.00069607	1.84637	0.00211177	NA	NA	-3.41597	0.00970965	-5.18544	3.07862e-09	ortholog_one2one	57.489	58	100	74.63	1	ortholog
ENSDARG00000003008	ENSG00000171132	prkcea	PRKCE	-1.03697	0.000167961	NA	NA	NA	NA	-2.20871	0.000212668	-3.59904	3.87751e-28	ortholog_one2many	85.6174	84.8118	25	96.49	1	ortholog
ENSDARG00000003022	ENSG00000106683	limk1b	LIMK1	NA	NA	1.28537	0.000272103	NA	NA	-1.27223	0.000798234	NA	NA	ortholog_one2many	52.5502	55.2846	0	45.96	0	ortholog
ENSDARG00000003046	ENSG00000154556	sorbs2a	SORBS2	-1.3233	0.026007	NA	NA	NA	NA	-2.44583	0.000195437	-2.80251	6.00453e-10	ortholog_one2many	52.5896	39.5802	50	76.7	1	ortholog
ENSDARG00000003061	ENSG00000103855	cd276	CD276	3.07017	1.52043e-07	2.72459	1.17403e-08	0.692946	0.0467512	1.16095	0.0178709	2.57974	2.13306e-18	ortholog_one2one	29.4007	52.3333	50	86.92	1	ortholog
ENSDARG00000003069	ENSG00000011114	btbd7	BTBD7	-1.67013	0.0175394	NA	NA	NA	NA	0.669214	0.0196931	NA	NA	ortholog_one2one	67.6678	71.1235	50	97.88	1	ortholog
ENSDARG00000003087	ENSG00000167671	ubxn6	UBXN6	-0.827276	0.0292367	NA	NA	NA	NA	NA	NA	-0.593384	0.00194752	ortholog_one2one	53.0612	53.5469	25	78.79	1	ortholog
ENSDARG00000003113	ENSG00000196839	ada	ADA	2.28506	2.2605e-08	2.03114	9.25679e-11	0.700569	0.000109356	NA	NA	NA	NA	ortholog_one2one	63.0854	63.2597	75	65.97	1	ortholog
ENSDARG00000003132	ENSG00000149089	apip	APIP	0.815862	0.0242671	NA	NA	NA	NA	NA	NA	NA	NA	ortholog_one2one	76.4463	76.7635	50	81.21	1	ortholog
ENSDARG00000003144	ENSG00000176894	pxmp2	PXMP2	NA	NA	0.700373	0.0336375	NA	NA	NA	NA	1.11497	0.000928691	ortholog_one2one	51.2821	51.5464	0	32.39	0	ortholog
ENSDARG00000003165	ENSG00000160113	nr2f6b	NR2F6	0.814756	0.0428366	NA	NA	NA	NA	NA	NA	NA	NA	ortholog_one2many	73.0198	73.0198	50	92.06	1	ortholog
ENSDARG00000003169	ENSG00000151276	magi1b	MAGI1	-0.64801	0.0208317	NA	NA	NA	NA	NA	NA	-1.08491	0.00880026	ortholog_one2many	63.2035	58.5405	50	87.6	1	ortholog
ENSDARG00000003193	ENSG00000099849	rassf7b	RASSF7	NA	NA	0.880858	0.00482752	NA	NA	-1.11431	0.0425707	NA	NA	ortholog_one2many	36.4611	31.8501	25	29.11	0	ortholog
ENSDARG00000003200	ENSG00000111206	foxm1	FOXM1	NA	NA	3.3399	4.65481e-12	1.6167	0.000312393	3.56732	0.00014763	4.75615	6.82502e-28	ortholog_one2one	38.9253	47.6726	0	63.39	1	ortholog
ENSDARG00000003216	ENSG00000182718	anxa2a	ANXA2	3.49931	3.90375e-16	2.92922	1.40734e-06	0.688756	4.2503e-10	NA	NA	4.01368	4.34867e-17	ortholog_one2many	66.9617	67.359	100	79.07	1	ortholog
ENSDARG00000003217	ENSG00000135763	urb2	URB2	0.943532	0.000748707	0.744559	0.0018644	NA	NA	NA	NA	0.590579	0.011129	ortholog_one2one	36.0236	36.7224	75	56.81	1	ortholog
ENSDARG00000003250	ENSG00000171608	pik3cd	PIK3CD	-1.04295	0.000377625	NA	NA	NA	NA	NA	NA	NA	NA	ortholog_one2one	67.8161	68.1424	25	97.92	1	ortholog
ENSDARG00000003251	ENSG00000236104	zbtb22b	ZBTB22	-1.91005	0.0358201	NA	NA	NA	NA	NA	NA	NA	NA	ortholog_one2many	38.3281	36.2146	0	63.16	1	ortholog
ENSDARG00000003259	ENSG00000113083	loxa	LOX	NA	NA	1.42361	0.0224111	NA	NA	NA	NA	4.34298	2.79428e-09	ortholog_one2one	63.3094	64.7059	0	54.39	1	ortholog
ENSDARG00000003281	ENSG00000100100	pik3ip1	PIK3IP1	-1.03924	0.00149713	-1.10614	2.19904e-13	-1.07014	4.74446e-25	NA	NA	NA	NA	ortholog_one2one	46.3878	46.0377	0	52.86	1	ortholog
ENSDARG00000003287	ENSG00000138442	wdr12	WDR12	0.665085	0.00227761	NA	NA	NA	NA	NA	NA	NA	NA	ortholog_one2one	77.7778	77.9621	0	96.81	1	ortholog
ENSDARG00000003290	ENSG00000173406	dab1b	DAB1	-2.23478	0.0029553	NA	NA	NA	NA	-1.70308	0.0305196	-2.24361	0.00144315	ortholog_one2many	44.5045	48.3366	50	41.56	1	ortholog
ENSDARG00000003326	ENSG00000075429	cacng5a	CACNG5	NA	NA	-0.86714	0.0250187	NA	NA	NA	NA	NA	NA	ortholog_one2many	90.1818	85.8131	0	97.59	1	ortholog
ENSDARG00000003373	ENSG00000114744	commd2	COMMD2	0.912235	0.0482699	0.688215	0.00478072	NA	NA	0.661533	0.015737	1.00675	0.000599126	ortholog_one2one	75.8794	75.8794	50	100	1	ortholog
ENSDARG00000003375	ENSG00000172380	gng12a	GNG12	0.944344	0.0328719	1.06645	0.00339573	NA	NA	NA	NA	2.28885	6.71538e-16	ortholog_one2many	76.3889	72.3684	25	42.67	0	ortholog
ENSDARG00000003449	ENSG00000112541	pde10a	PDE10A	-1.85015	0.00011901	NA	NA	NA	NA	NA	NA	NA	NA	ortholog_one2one	61.9905	77.5801	50	76.82	1	ortholog
ENSDARG00000003462	ENSG00000066926	fech	FECH	-1.95192	4.90361e-05	0.745216	0.000488722	NA	NA	NA	NA	NA	NA	ortholog_one2one	69.74	72.1271	50	86.27	1	ortholog
ENSDARG00000003517	ENSG00000133731	impa1	IMPA1	0.835339	0.00591914	NA	NA	NA	NA	NA	NA	NA	NA	ortholog_one2one	67.148	65.9574	0	95.41	1	ortholog
ENSDARG00000003526	ENSG00000143106	psma5	PSMA5	1.57578	2.40197e-07	0.722016	0.00152471	NA	NA	NA	NA	NA	NA	ortholog_one2one	95.8506	95.8506	50	84.4	1	ortholog
ENSDARG00000003527	ENSG00000198042	mak16	MAK16	1.98062	1.96422e-05	NA	NA	NA	NA	NA	NA	NA	NA	ortholog_one2one	74.3333	73.1148	25	97.76	1	ortholog
ENSDARG00000003544	ENSG00000197381	adarb1b	ADARB1	-1.92403	0.000685875	NA	NA	NA	NA	-2.02306	3.72434e-05	-2.54469	2.08297e-12	ortholog_one2many	78.0314	78.2546	25	100	1	ortholog
ENSDARG00000003570	ENSG00000166598	hsp90b1	HSP90B1	1.34767	6.39683e-20	1.00269	0.00020743	NA	NA	NA	NA	NA	NA	ortholog_one2one	83.8107	84.8676	0	89.61	1	ortholog
ENSDARG00000003573	ENSG00000166847	dctn5	DCTN5	0.735624	0.0308557	NA	NA	NA	NA	NA	NA	-0.647687	8.70038e-05	ortholog_one2one	96.1538	96.1538	0	100	1	ortholog
ENSDARG00000003599	ENSG00000100316	rpl3	RPL3	1.32719	1.14197e-15	1.08617	1.54222e-05	NA	NA	1.2498	0.0010797	NA	NA	ortholog_one2one	89.8263	89.8263	0	99.79	1	ortholog
ENSDARG00000003631	ENSG00000134852	clockb	CLOCK	-1.068	0.0183723	NA	NA	NA	NA	-0.821674	0.0066294	-1.05788	0.00506574	ortholog_one2many	59.6927	61.5854	0	58.3	1	ortholog
ENSDARG00000003681	ENSG00000100664	eif5	EIF5	0.598393	0.0217336	NA	NA	NA	NA	-0.630452	0.00672414	NA	NA	ortholog_one2one	75.174	75.5245	50	89.72	1	ortholog
ENSDARG00000003693	ENSG00000112855	hars	HARS2	0.96578	0.000214405	NA	NA	NA	NA	NA	NA	NA	NA	ortholog_one2many	63.834	62.1154	25	83.01	1	ortholog
ENSDARG00000003750	ENSG00000178921	pfas	PFAS	NA	NA	1.20445	0.000687316	NA	NA	NA	NA	NA	NA	ortholog_one2one	61.8834	63.0137	0	79.81	1	ortholog
ENSDARG00000003757	ENSG00000146910	cnpy1	CNPY1	2.18842	3.34565e-11	NA	NA	NA	NA	2.19155	0.0358833	3.43703	0.000313699	ortholog_one2one	26.7544	32.6203	100	64.42	1	ortholog
ENSDARG00000003789	ENSG00000170456	dennd5b	DENND5B	-0.962199	0.000430776	NA	NA	NA	NA	NA	NA	-1.53714	1.63543e-07	ortholog_one2one	75.8242	74.8257	0	89.46	1	ortholog
ENSDARG00000003795	ENSG00000182054	idh2	IDH2	0.762462	0.0134264	NA	NA	NA	NA	NA	NA	NA	NA	ortholog_one2one	44.9115	90.2222	0	74.66	1	ortholog
ENSDARG00000003808	ENSG00000165272	aqp3a	AQP3	4.41208	0.00797498	NA	NA	NA	NA	-3.26598	0.000592896	-2.90375	1.13796e-07	ortholog_one2many	65.411	64.527	0	78.18	1	ortholog
ENSDARG00000003846	ENSG00000197345	mrpl21	MRPL21	0.926681	0.0107823	NA	NA	NA	NA	NA	NA	NA	NA	ortholog_one2one	57.0732	56.25	0	51.93	1	ortholog
ENSDARG00000003854	ENSG00000151726	acsl1b	ACSL1	1.5514	0.0471832	1.49605	2.64616e-05	0.931558	0.00466439	NA	NA	NA	NA	ortholog_one2many	65.4728	65.5667	0	47.08	0	ortholog
ENSDARG00000003860	ENSG00000122565	cbx3a	CBX3	0.793599	0.00376256	NA	NA	NA	NA	1.05659	9.8025e-06	1.54058	2.48521e-10	ortholog_one2one	74.3169	76.8362	25	97.57	1	ortholog
ENSDARG00000003872	ENSG00000135736	ccdc102a	CCDC102A	-1.30083	0.00387006	NA	NA	NA	NA	1.5287	0.00257179	1.90611	2.0319e-06	ortholog_one2one	67.2727	63.6833	25	80.49	1	ortholog
ENSDARG00000003877	ENSG00000163939	pbrm1	PBRM1	-0.74913	0.00680835	NA	NA	NA	NA	NA	NA	NA	NA	ortholog_one2one	72.5281	75.2919	50	91.24	1	ortholog
ENSDARG00000003927	ENSG00000157224	cldn12	CLDN12	NA	NA	1.14245	5.4277e-07	NA	NA	NA	NA	0.842169	0.00523826	ortholog_one2one	54.0984	38.7097	0	78.62	1	ortholog
ENSDARG00000003931	ENSG00000133313	cndp2	CNDP2	2.12898	1.55543e-10	2.28881	1.80875e-06	NA	NA	NA	NA	-0.636895	0.00310504	ortholog_one2one	77.4737	77.6371	25	95.01	1	ortholog
ENSDARG00000003941	ENSG00000179041	rrs1	RRS1	1.60387	1.90801e-06	NA	NA	NA	NA	0.621627	0.0351696	NA	NA	ortholog_one2one	60.274	63.5838	25	92.29	1	ortholog
ENSDARG00000003952	ENSG00000070087	pfn2	PFN2	0.660779	0.0291231	NA	NA	NA	NA	NA	NA	NA	NA	ortholog_one2many	50.5319	67.8571	0	87.92	1	ortholog
ENSDARG00000003973	ENSG00000110172	chordc1a	CHORDC1	-1.65801	8.93765e-05	NA	NA	NA	NA	NA	NA	NA	NA	ortholog_one2many	66.5663	65.1917	50	51.59	1	ortholog
ENSDARG00000003989	ENSG00000120088	crhr1	CRHR1	-2.17208	0.00043234	NA	NA	NA	NA	-2.20446	0.00262336	-3.58235	1.62029e-07	ortholog_one2many	83.1325	80.2326	0	88.77	1	ortholog
ENSDARG00000004018	ENSG00000180767	CHST13	CHST13	1.54826	0.0343012	1.29098	0.000177157	NA	NA	-1.88727	0.0205794	NA	NA	ortholog_one2one	42.8153	42.9412	50	78.47	1	ortholog
ENSDARG00000004049	ENSG00000277443	marcksa	MARCKS	NA	NA	0.881217	8.37203e-08	1.01193	4.6757e-11	1.5498	5.00668e-05	0.995105	0.000129469	ortholog_one2many	38.5542	54.2373	0	95.56	1	ortholog
ENSDARG00000004059	ENSG00000156958	galk2	GALK2	1.28323	0.017642	0.751874	0.0198692	NA	NA	NA	NA	NA	NA	ortholog_one2one	65.0655	65.2079	50	78.04	1	ortholog
ENSDARG00000004060	ENSG00000134107	bhlhe40	BHLHE40	-0.982842	0.00421025	-0.63409	1.49078e-05	-0.621424	2.32358e-07	-1.48812	0.0288409	NA	NA	ortholog_one2one	58.4951	59.8015	25	93.73	1	ortholog
ENSDARG00000004105	ENSG00000066056	tie1	TIE1	2.26919	0.000581269	1.82138	0.000133062	0.813369	9.38344e-07	NA	NA	NA	NA	ortholog_one2one	57.4692	56.8696	25	67.39	1	ortholog
ENSDARG00000004111	ENSG00000091831	esr1	ESR1	NA	NA	-0.952072	0.019267	-0.843378	0.000251102	NA	NA	NA	NA	ortholog_one2one	46.7227	48.8576	50	46.63	1	ortholog
ENSDARG00000004150	ENSG00000164082	grm2a	GRM2	NA	NA	-1.79989	0.00079476	NA	NA	-3.15571	0.00137506	-4.19402	2.04754e-11	ortholog_one2many	71.789	70.0224	25	96.03	1	ortholog
ENSDARG00000004151	ENSG00000112210	rab23	RAB23	-1.44275	0.000121704	NA	NA	NA	NA	NA	NA	0.730753	0.0249263	ortholog_one2one	83.9662	83.9662	50	98.62	1	ortholog
ENSDARG00000004158	ENSG00000165548	tmem63c	TMEM63C	-1.36164	0.000125346	NA	NA	NA	NA	-1.39091	0.0281235	-2.69001	1.43364e-07	ortholog_one2one	52.6055	51.3939	75	38.03	1	ortholog
ENSDARG00000004169	ENSG00000117632	stmn1a	STMN1	NA	NA	0.67225	0.00795831	NA	NA	-1.327	0.00153107	-1.45139	0.000332712	ortholog_one2many	75.8389	76.3513	0	96.81	1	ortholog
ENSDARG00000004184	ENSG00000196712	nf1b	NF1	-1.09664	0.0263295	NA	NA	NA	NA	NA	NA	-1.11214	0.00016904	ortholog_one2one	85.4526	87.9304	25	98.44	1	ortholog
ENSDARG00000004219	ENSG00000142319	slc6a3	SLC6A3	NA	NA	-0.851387	0.0172117	NA	NA	NA	NA	NA	NA	ortholog_one2one	75	73.9269	0	91.08	1	ortholog
ENSDARG00000004243	ENSG00000072182	asic4b	ASIC4	-1.43419	0.00475479	-0.596605	0.0114302	-0.817101	1.13329e-05	2.82227	0.00148471	NA	NA	ortholog_one2many	59.3692	57.3477	25	66.72	1	ortholog
ENSDARG00000004251	ENSG00000228716	dhfr	DHFR	NA	NA	0.83324	0.0423031	NA	NA	1.35401	0.00172242	1.76689	5.30284e-09	ortholog_many2many	60.4278	59.4737	50	38.89	1	ortholog
ENSDARG00000004261	ENSG00000184840	tmed9	TMED9	1.17924	1.63819e-05	NA	NA	NA	NA	NA	NA	0.930926	2.41424e-05	ortholog_one2one	78.2979	82.5112	25	87.18	1	ortholog
ENSDARG00000004270	ENSG00000184743	atl3	ATL3	1.34321	0.00188939	0.955447	0.00016821	NA	NA	0.888089	0.0245484	0.878998	0.00105704	ortholog_one2one	65.0647	68.616	0	92.46	1	ortholog
ENSDARG00000004291	ENSG00000002746	hecw1b	HECW1	-1.56042	0.00540746	NA	NA	NA	NA	-2.28944	0.00684449	-4.11407	5.28169e-08	ortholog_one2many	67.746	70.1031	50	64.47	1	ortholog
ENSDARG00000004301	ENSG00000177105	rhogb	RHOG	3.21466	7.34893e-19	3.23547	1.02504e-12	0.778361	0.0444431	NA	NA	NA	NA	ortholog_one2many	80.1047	80.1047	75	100	1	ortholog
ENSDARG00000004302	ENSG00000162426	slc45a1	SLC45A1	-0.807968	0.00935968	NA	NA	NA	NA	-1.49616	2.2122e-05	-1.69163	4.34281e-07	ortholog_one2one	67.9144	63.3416	0	81.1	1	ortholog
ENSDARG00000004307	ENSG00000187123	lypd6	LYPD6	-2.23895	0.00133902	-0.918506	0.0188751	NA	NA	NA	NA	NA	NA	ortholog_one2one	66.6667	65.5172	25	85.52	1	ortholog
ENSDARG00000004336	ENSG00000131558	exoc4	EXOC4	-1.7713	0.00452337	NA	NA	NA	NA	NA	NA	NA	NA	ortholog_one2one	79.5688	80.062	25	93.36	1	ortholog
ENSDARG00000004372	ENSG00000161791	fmnl3	FMNL3	NA	NA	1.31239	7.53813e-05	0.838568	2.24991e-08	0.781928	0.0164239	0.659709	0.0129316	ortholog_one2one	73.7098	72.3018	0	91.08	1	ortholog
ENSDARG00000004378	ENSG00000000938	yrk	FGR	1.7105	5.47422e-05	1.5465	4.56147e-05	NA	NA	NA	NA	1.13241	0.0133889	ortholog_one2one	69.3762	69.5076	50	61.05	1	ortholog
ENSDARG00000004427	ENSG00000162961	dpy30	DPY30	1.05123	0.0407833	NA	NA	NA	NA	NA	NA	0.696821	0.0147842	ortholog_one2one	72.7273	67.9245	50	86.34	1	ortholog
ENSDARG00000004433	ENSG00000010671	btk	BTK	3.69227	8.20115e-13	3.2725	4.57461e-08	NA	NA	NA	NA	1.72848	7.99558e-05	ortholog_one2one	62.8225	64.6875	25	90.65	1	ortholog
ENSDARG00000004436	ENSG00000188343	fam92a1	CIBAR1	1.23523	0.000293678	NA	NA	NA	NA	NA	NA	NA	NA	ortholog_one2one	65.0519	63.7288	50	71.93	1	ortholog
ENSDARG00000004470	ENSG00000130175	prkcsh	PRKCSH	0.901097	1.15257e-06	NA	NA	NA	NA	0.597275	0.0268529	NA	NA	ortholog_one2one	58.6916	59.3573	25	67.33	1	ortholog
ENSDARG00000004473	ENSG00000073861	tbx21	TBX21	NA	NA	1.54075	0.0138065	1.81161	0.023684	NA	NA	2.02622	0.0043296	ortholog_many2many	46.729	41.0509	50	8.38	1	ortholog
ENSDARG00000004517	ENSG00000128059	ppat	PPAT	1.6984	0.000405967	NA	NA	NA	NA	NA	NA	NA	NA	ortholog_one2one	73.3075	74.6063	75	97.29	1	ortholog
ENSDARG00000004525	ENSG00000143793	C2H1orf35	C1orf35	1.27138	0.00964757	NA	NA	NA	NA	0.633222	0.0460665	NA	NA	ortholog_one2one	48.289	41.5033	50	38.86	1	ortholog
ENSDARG00000004527	ENSG00000102309	pin4	PIN4	1.16576	0.00234971	NA	NA	NA	NA	NA	NA	NA	NA	ortholog_one2one	80.916	82.8125	0	71.51	1	ortholog
ENSDARG00000004576	ENSG00000142731	plk4	PLK4	NA	NA	1.17479	3.06845e-05	NA	NA	NA	NA	1.92633	3.64557e-07	ortholog_one2one	49.5876	51.1158	25	71.88	1	ortholog
ENSDARG00000004580	ENSG00000157064	nmnat2	NMNAT2	-0.787899	0.00215406	NA	NA	NA	NA	-1.93037	0.0100249	-3.96006	8.09361e-10	ortholog_one2one	85.9935	86.8421	75	100	1	ortholog
ENSDARG00000004588	ENSG00000124766	sox4a	SOX4	0.859009	0.0221847	0.717658	3.03529e-08	1.12738	1.5428e-47	3.59093	9.66558e-09	3.05462	1.02155e-07	ortholog_one2many	43.038	56.1983	50	92.55	1	ortholog
ENSDARG00000004592	ENSG00000172209	gpr22a	GPR22	-0.787652	0.0364095	NA	NA	NA	NA	-3.1959	0.0146771	-4.70341	2.15907e-07	ortholog_one2many	75.7506	71.3043	50	95.14	1	ortholog
ENSDARG00000004597	ENSG00000131409	lrrc4ba	LRRC4B	-1.73442	2.90963e-08	NA	NA	NA	NA	-0.773063	0.0239251	-1.07746	0.00834056	ortholog_one2many	67.1809	65.7064	50	71.12	1	ortholog
ENSDARG00000004616	ENSG00000087053	mtmr2	MTMR2	1.03918	0.000460584	1.18765	0.000348388	NA	NA	NA	NA	NA	NA	ortholog_one2one	72.0062	74.6774	0	82.88	1	ortholog
ENSDARG00000004618	ENSG00000111450	stx2a	STX2	1.99632	0.0108027	2.22488	2.35995e-06	1.41087	0.00648832	NA	NA	NA	NA	ortholog_one2many	33.3333	43.4389	0	41.77	0	ortholog
ENSDARG00000004647	ENSG00000163611	spice1	SPICE1	2.06968	0.0246875	NA	NA	NA	NA	0.779819	0.0146332	0.966658	0.000175585	ortholog_one2many	25.9649	30.663	0	0	0	ortholog
ENSDARG00000004648	ENSG00000183775	kctd16a	KCTD16	-2.39078	0.000638797	NA	NA	NA	NA	-2.92729	0.00134422	-4.54777	9.65918e-11	ortholog_one2many	40.4206	60.7018	25	80.87	1	ortholog
ENSDARG00000004687	ENSG00000060971	acaa1	ACAA1	1.12076	0.00100079	NA	NA	NA	NA	NA	NA	NA	NA	ortholog_one2one	71.6981	72.7273	100	94.55	1	ortholog
ENSDARG00000004692	ENSG00000173559	nabp1a	NABP1	0.623923	0.0220754	NA	NA	NA	NA	NA	NA	NA	NA	ortholog_one2many	64.7059	62.5592	0	68.88	1	ortholog
ENSDARG00000004697	ENSG00000143171	rxrgb	RXRG	1.75197	0.00268117	2.06058	0.00944117	NA	NA	NA	NA	NA	NA	ortholog_many2many	70.4104	72.1239	0	67.19	1	ortholog
ENSDARG00000004713	ENSG00000164109	mad2l1	MAD2L1	2.59458	0.0154479	2.81506	2.93429e-07	1.26874	0.0440241	NA	NA	2.24765	1.40028e-07	ortholog_one2one	74.1463	75.2475	0	93.99	1	ortholog
ENSDARG00000004721	ENSG00000072415	mpp5b	MPP5	-2.10721	0.000226646	NA	NA	-0.662518	0.00923625	NA	NA	NA	NA	ortholog_one2many	50.8148	53.6776	100	57.57	1	ortholog
ENSDARG00000004745	ENSG00000139636	lmbr1l	LMBR1L	NA	NA	-0.71852	0.00563133	NA	NA	NA	NA	NA	NA	ortholog_one2one	67.8937	67.6171	25	75.47	1	ortholog
ENSDARG00000004757	ENSG00000065978	ybx1	YBX1	1.45012	2.52228e-11	1.03323	1.49278e-06	NA	NA	1.80612	3.94839e-06	2.34447	1.75401e-22	ortholog_one2one	70.3704	73.7864	25	91.37	1	ortholog
ENSDARG00000004789	ENSG00000168702	lrp1ba	LRP1B	-1.63455	5.25512e-05	NA	NA	NA	NA	NA	NA	-1.80939	1.61098e-05	ortholog_one2many	51.5982	70.6671	0	57.6	1	ortholog
ENSDARG00000004840	ENSG00000068028	rassf1	RASSF1	NA	NA	NA	NA	0.607022	0.00419626	NA	NA	NA	NA	ortholog_one2one	42.6471	45.1713	50	85.23	1	ortholog
ENSDARG00000004874	ENSG00000106686	spata6l	SPATA6L	NA	NA	1.60969	0.00984422	NA	NA	-1.20384	0.0266913	NA	NA	ortholog_one2one	26.5306	30.7692	25	32.26	0	ortholog
ENSDARG00000004877	ENSG00000134318	rock2b	ROCK2	NA	NA	-0.847084	0.0110056	-0.81616	0.0220364	-0.837764	0.00521584	-1.0569	2.45554e-05	ortholog_one2many	63.5447	62.955	0	72.24	1	ortholog
ENSDARG00000004880	ENSG00000005187	acsm3	ACSM3	NA	NA	NA	NA	0.826508	0.0111817	NA	NA	1.35726	0.00156769	ortholog_one2one	63.8225	63.2826	0	87.84	1	ortholog
ENSDARG00000004925	ENSG00000184903	immp2l	IMMP2L	0.945002	0.0405463	NA	NA	NA	NA	NA	NA	0.815154	0.0206709	ortholog_one2one	66.2857	63.0435	50	63.47	1	ortholog
ENSDARG00000004930	ENSG00000136153	lmo7a	LMO7	1.39924	8.43054e-07	NA	NA	NA	NA	-2.47322	0.000333892	-2.6286	2.32846e-15	ortholog_one2many	38.32	34.2278	75	47.55	1	ortholog
ENSDARG00000004931	ENSG00000100678	slc8a3	SLC8A3	-2.08063	0.000363055	NA	NA	NA	NA	NA	NA	-1.75704	0.0430491	ortholog_one2one	71.987	72.301	25	72.6	1	ortholog
ENSDARG00000004937	ENSG00000145604	skp2	SKP2	2.58171	0.0140509	2.99447	2.59165e-07	1.54832	0.011031	NA	NA	1.11671	7.38337e-05	ortholog_one2one	43.8679	45.3659	50	35.27	1	ortholog
ENSDARG00000004948	ENSG00000107949	bccip	BCCIP	0.838155	0.0127889	NA	NA	NA	NA	0.718727	0.00759242	NA	NA	ortholog_one2one	51.2739	53.4884	50	76.25	1	ortholog
ENSDARG00000004952	ENSG00000134321	rsad2	RSAD2	NA	NA	5.54954	6.26539e-09	NA	NA	NA	NA	NA	NA	ortholog_one2one	68.9751	69.3593	75	84.6	1	ortholog
ENSDARG00000004979	ENSG00000012660	elovl5	ELOVL5	-0.989279	0.00851061	NA	NA	NA	NA	0.759573	0.011342	NA	NA	ortholog_one2one	69.8997	71.8213	75	78.73	1	ortholog
ENSDARG00000005023	ENSG00000122642	fkbp9	FKBP9	2.31506	1.5873e-06	2.42955	3.97529e-06	NA	NA	NA	NA	1.77836	3.99348e-06	ortholog_one2one	65.4386	66.1348	0	89.55	1	ortholog
ENSDARG00000005049	ENSG00000139832	rab20	RAB20	1.51587	0.00252933	1.3156	4.99259e-05	NA	NA	1.31378	0.0289854	2.24017	1.03243e-08	ortholog_one2one	64.5299	62.3967	75	98.42	1	ortholog
ENSDARG00000005058	ENSG00000010292	ncapd2	NCAPD2	1.29938	0.0331518	1.87603	5.12937e-08	0.62775	0.000371519	1.37568	0.00100407	0.92765	0.000779635	ortholog_one2one	49.1792	49.9275	0	56.93	1	ortholog
ENSDARG00000005085	ENSG00000006625	ggctb	GGCT	NA	NA	NA	NA	1.80611	0.000185019	NA	NA	NA	NA	ortholog_one2many	53.7234	45.9091	50	59.54	1	ortholog
ENSDARG00000005115	ENSG00000128595	calub	CALU	1.78163	1.12728e-05	1.11733	0.000478663	NA	NA	NA	NA	2.18897	3.60494e-08	ortholog_one2one	77.1429	77.1429	0	76.05	1	ortholog
ENSDARG00000005126	ENSG00000133424	large1	LARGE1	-1.97037	0.0213485	NA	NA	NA	NA	-1.95358	3.48553e-07	-2.64698	4.84057e-15	ortholog_one2one	84.127	84.0159	0	76.2	1	ortholog
ENSDARG00000005134	ENSG00000108671	psmd11b	PSMD11	0.653963	0.00313223	NA	NA	NA	NA	NA	NA	NA	NA	ortholog_one2many	91.4692	91.4692	0	97.12	1	ortholog
ENSDARG00000005141	ENSG00000164076	camkvb	CAMKV	-0.644896	0.0393735	NA	NA	NA	NA	-3.27066	0.00154851	-4.55813	1.48765e-08	ortholog_one2many	61.0778	70.1835	50	80.15	1	ortholog
ENSDARG00000005154	ENSG00000108381	aspa	ASPA	-1.60887	0.0156627	NA	NA	NA	NA	NA	NA	-3.39653	1.66135e-07	ortholog_one2one	60.7029	60.3175	25	80.68	1	ortholog
ENSDARG00000005159	ENSG00000008256	cyth1a	CYTH3	-1.0182	0.0141416	NA	NA	NA	NA	NA	NA	NA	NA	ortholog_one2many	90.9774	91.6667	50	24.09	1	ortholog
ENSDARG00000005162	ENSG00000143549	tpm3	TPM3	1.20805	3.99575e-07	0.628457	0.00471761	NA	NA	-0.74373	0.00156604	NA	NA	ortholog_one2one	87.3684	87.6761	0	28.85	0	ortholog
ENSDARG00000005176	ENSG00000171428	zgc:101040	NAT1	NA	NA	0.71169	1.17538e-05	NA	NA	1.50196	0.0123233	2.68456	9.16329e-10	ortholog_many2many	39.6552	39.6552	0	97.83	1	ortholog
ENSDARG00000005191	ENSG00000101444	ahcy	AHCY	0.848545	0.00340493	1.21644	0.000355365	NA	NA	NA	NA	1.14046	0.000133189	ortholog_one2one	86.3426	86.1432	50	97.86	1	ortholog
ENSDARG00000005218	ENSG00000124535	wrnip1	WRNIP1	NA	NA	1.08694	2.25594e-05	NA	NA	NA	NA	NA	NA	ortholog_one2one	52.6316	64.1026	50	78.18	1	ortholog
ENSDARG00000005230	ENSG00000163479	ssr2	SSR2	1.81137	8.80843e-10	1.07334	6.9388e-05	NA	NA	1.23569	3.57446e-05	1.87418	3.67276e-10	ortholog_one2one	86.3388	84.9462	0	99.47	1	ortholog
ENSDARG00000005232	ENSG00000205476	ccdc85ca	CCDC85C	-0.920771	0.0339064	NA	NA	NA	NA	NA	NA	-0.899435	0.00638487	ortholog_one2many	61.3365	65.7289	50	88.5	1	ortholog
ENSDARG00000005251	ENSG00000197713	rpe	RPE	0.608021	0.0266126	NA	NA	NA	NA	NA	NA	NA	NA	ortholog_one2many	81.1404	81.1404	0	100	1	ortholog
ENSDARG00000005343	ENSG00000055813	ccdc85al	CCDC85A	-0.628015	0.0418178	NA	NA	NA	NA	-2.01348	0.0107431	-4.24837	3.59219e-11	ortholog_one2many	35.9855	45.6422	0	83.74	1	ortholog
ENSDARG00000005350	ENSG00000066084	dip2ba	DIP2B	1.26609	5.94001e-07	1.44407	3.37024e-08	0.799545	1.38386e-23	NA	NA	-1.1452	0.000249787	ortholog_one2many	81.0279	80.9765	25	88.97	1	ortholog
ENSDARG00000005364	ENSG00000116032	grin3ba	GRIN3B	-1.44291	0.0352924	NA	NA	NA	NA	NA	NA	NA	NA	ortholog_one2many	52.349	47.2318	0	49.97	0	ortholog
ENSDARG00000005368	ENSG00000076706	mcamb	MCAM	1.63149	0.00161289	2.34354	2.76402e-07	0.734846	1.61943e-10	NA	NA	NA	NA	ortholog_one2many	29.8762	31.2804	50	16.16	1	ortholog
ENSDARG00000005372	ENSG00000152495	camk4	CAMK4	-0.844314	0.0259014	-0.708489	0.0153213	NA	NA	-2.21446	0.030818	-4.0449	6.89799e-15	ortholog_one2one	59.6194	77.4725	50	81.23	1	ortholog
ENSDARG00000005392	ENSG00000105641	slc5a5	SLC5A5	NA	NA	NA	NA	1.71559	0.00313338	-3.37967	0.00179727	-4.18637	3.52891e-09	ortholog_one2one	55.521	59.401	0	68.11	1	ortholog
ENSDARG00000005394	ENSG00000119772	dnmt3aa	DNMT3A	-2.28421	0.000851111	NA	NA	NA	NA	NA	NA	NA	NA	ortholog_one2many	59.1009	63.2629	50	76.33	1	ortholog
ENSDARG00000005397	ENSG00000110171	trim3b	TRIM3	-0.824592	0.00121077	NA	NA	NA	NA	-1.35626	1.85305e-05	-1.7146	4.70873e-18	ortholog_one2many	75.8064	75	25	99.78	1	ortholog
ENSDARG00000005414	ENSG00000154016	grapa	GRAP	3.27237	2.75362e-09	3.56197	9.63392e-13	0.822525	0.0466638	1.17451	0.0276539	1.89649	1.80209e-06	ortholog_many2many	57.1429	57.9439	100	81.39	1	ortholog
ENSDARG00000005416	ENSG00000197442	map3k5	MAP3K5	NA	NA	NA	NA	-0.585332	1.34601e-14	NA	NA	-0.844145	0.0443223	ortholog_one2one	71.3246	71.8475	0	81.74	1	ortholog
ENSDARG00000005423	ENSG00000171314	pgam1a	PGAM1	1.07709	1.38837e-05	NA	NA	NA	NA	-1.07836	0.000422916	NA	NA	ortholog_many2many	90.1575	90.1575	25	81.97	1	ortholog
ENSDARG00000005425	ENSG00000085449	wdfy1	WDFY1	-0.906769	0.0158725	NA	NA	NA	NA	NA	NA	NA	NA	ortholog_one2many	79.0244	79.0244	75	100	1	ortholog
ENSDARG00000005454	ENSG00000013810	tacc3	TACC3	NA	NA	2.23169	2.36673e-07	NA	NA	2.03081	0.0160193	3.02146	9.66298e-17	ortholog_one2one	28.9976	25.7962	0	20.66	0	ortholog
ENSDARG00000005462	ENSG00000090889	kif4	KIF4A	NA	NA	3.22164	1.77065e-18	1.26769	0.00511381	3.18309	0.000475043	4.85755	1.03514e-31	ortholog_one2one	61.9318	61.1378	0	74.38	1	ortholog
ENSDARG00000005464	ENSG00000013563	dnase1l1	DNASE1L1	1.99848	0.00988167	2.37001	7.26009e-07	NA	NA	NA	NA	NA	NA	ortholog_one2one	41.7219	39.7476	50	42.38	1	ortholog
ENSDARG00000005476	ENSG00000067798	nav3	NAV3	-0.721574	0.00546012	NA	NA	NA	NA	-1.89224	0.000893016	-3.04924	1.40222e-08	ortholog_one2one	61.9287	65.0948	50	88.02	1	ortholog
ENSDARG00000005482	ENSG00000109756	rapgef2	RAPGEF2	-0.641539	0.0440271	NA	NA	NA	NA	-1.26923	0.000285858	-2.27371	1.27033e-18	ortholog_one2one	76.5932	79.4317	50	90.73	1	ortholog
ENSDARG00000005513	ENSG00000196531	naca	NACA	1.17215	0.000301463	0.612197	0.00012651	NA	NA	0.883072	0.0043335	NA	NA	ortholog_one2one	9.86526	95.3488	25	54.6	0	ortholog
ENSDARG00000005541	ENSG00000156076	wif1	WIF1	NA	NA	1.1453	0.0109322	NA	NA	NA	NA	-4.23374	0.000409413	ortholog_one2one	68.6016	68.7831	50	76.49	1	ortholog
ENSDARG00000005565	ENSG00000188833	entpd8	ENTPD8	3.41347	0.00039754	1.47545	0.0330356	NA	NA	NA	NA	NA	NA	ortholog_one2one	44.4444	44.3548	0	22.73	0	ortholog
ENSDARG00000005612	ENSG00000138613	aph1b	APH1B	1.30514	2.6835e-07	NA	NA	NA	NA	NA	NA	NA	NA	ortholog_one2one	62.2568	62.0155	0	90.7	1	ortholog
ENSDARG00000005619	ENSG00000117650	nek2	NEK2	NA	NA	1.54436	0.000118263	NA	NA	NA	NA	3.16207	5.53385e-11	ortholog_one2one	67.191	67.9545	75	58.84	1	ortholog
ENSDARG00000005643	ENSG00000100116	gcat	GCAT	0.811358	0.0074128	NA	NA	NA	NA	NA	NA	NA	NA	ortholog_one2one	64.2005	62.413	0	92.79	1	ortholog
ENSDARG00000005675	ENSG00000058262	sec61a1l	SEC61A1	0.917991	9.13567e-06	NA	NA	NA	NA	1.07475	0.000100044	1.56903	9.74441e-15	ortholog_one2many	96.0084	96.0084	0	99.53	1	ortholog
ENSDARG00000005679	ENSG00000125733	trip10a	TRIP10	1.80944	0.00899119	1.80844	3.92737e-06	0.843527	0.00816684	1.10732	0.0427467	1.97332	5.54072e-13	ortholog_one2many	54.4093	60.8939	0	81.83	1	ortholog
ENSDARG00000005690	ENSG00000125648	slc25a23a	SLC25A23	NA	NA	-0.63698	0.000114371	-0.701806	5.93772e-06	-1.02069	0.00177719	-1.55142	1.52474e-08	ortholog_one2many	64.1026	62.8931	0	10.96	0	ortholog
ENSDARG00000005738	ENSG00000117133	rpf1	RPF1	1.08165	0.0102901	NA	NA	NA	NA	NA	NA	0.929839	1.81272e-05	ortholog_one2one	70.4871	69.8864	50	73	1	ortholog
ENSDARG00000005772	ENSG00000158526	tsr2	TSR2	1.63551	4.12327e-06	0.722661	0.00580382	NA	NA	-0.701451	0.00833102	-1.24932	9.87001e-13	ortholog_one2one	41.3613	43.4066	0	32.83	0	ortholog
ENSDARG00000005786	ENSG00000100034	ppm1f	PPM1F	-2.29158	0.010568	NA	NA	NA	NA	NA	NA	NA	NA	ortholog_one2one	35.4626	37.9717	75	60.08	1	ortholog
ENSDARG00000005789	ENSG00000197594	enpp1	ENPP1	3.13886	1.84272e-05	3.83911	3.29593e-07	1.06963	0.02034	NA	NA	NA	NA	ortholog_one2one	49.6216	52.2779	0	42.37	0	ortholog
ENSDARG00000005791	ENSG00000108107	rpl28	RPL28	1.80076	5.81446e-07	1.24171	6.62768e-07	NA	NA	NA	NA	1.02577	0.00133675	ortholog_one2one	76.6423	69.5364	0	96.63	1	ortholog
ENSDARG00000005799	ENSG00000163683	smim14	SMIM14	NA	NA	0.813196	0.00209054	NA	NA	NA	NA	-0.634766	0.00810633	ortholog_one2one	65.6566	63.1068	100	40.83	1	ortholog
ENSDARG00000005821	ENSG00000116701	ncf2	NCF2	1.24437	0.0079295	NA	NA	NA	NA	NA	NA	2.23485	1.45662e-06	ortholog_one2one	43.5361	45.8	0	42.03	0	ortholog
ENSDARG00000005827	ENSG00000134001	eif2s1a	EIF2S1	1.33031	4.18401e-09	0.664086	0.00208769	NA	NA	NA	NA	NA	NA	ortholog_one2many	93.6508	93.6508	50	99.9	1	ortholog
ENSDARG00000005834	ENSG00000143614	gatad2b	GATAD2B	-2.23514	0.00746029	NA	NA	NA	NA	NA	NA	-0.63085	0.0141889	ortholog_one2one	73.6931	67.5425	25	88.92	1	ortholog
ENSDARG00000005853	ENSG00000169100	slc25a6	SLC25A6	-1.22434	0.0249843	NA	NA	NA	NA	NA	NA	NA	NA	ortholog_one2one	90.604	90.604	75	0	1	ortholog
ENSDARG00000005861	ENSG00000188559	ralgapa2	RALGAPA2	-0.824611	0.000151757	NA	NA	NA	NA	NA	NA	NA	NA	ortholog_one2one	66.6845	63.4977	50	76.06	1	ortholog
ENSDARG00000005891	ENSG00000100243	cyb5r3	CYB5R3	0.834026	0.0344115	NA	NA	NA	NA	NA	NA	NA	NA	ortholog_one2one	70.7641	71.4765	0	79.67	1	ortholog
ENSDARG00000005908	ENSG00000013441	clk4b	CLK1	1.05601	0.00449273	NA	NA	NA	NA	NA	NA	NA	NA	ortholog_one2one	57.438	58.0376	0	75.41	1	ortholog
ENSDARG00000005915	ENSG00000071564	tcf3a	TCF3	-1.43074	0.0145985	NA	NA	NA	NA	2.05907	9.38341e-10	1.81004	1.8881e-09	ortholog_one2many	42.0489	48.2456	0	27.3	0	ortholog
ENSDARG00000005926	ENSG00000004455	ak2	AK2	1.66062	4.08867e-15	1.25541	4.60469e-05	NA	NA	0.991351	0.00424625	1.76163	9.39672e-14	ortholog_one2one	77.8243	77.1784	0	100	1	ortholog
ENSDARG00000005989	ENSG00000143344	rgl1	RGL1	1.27694	0.0137286	1.31472	0.000925082	NA	NA	-0.65131	0.0392331	-0.96309	0.00010949	ortholog_one2one	66.5365	63.5572	0	77.81	1	ortholog
ENSDARG00000005993	ENSG00000198901	prc1b	PRC1	2.06577	0.0271668	3.04307	4.70447e-09	NA	NA	NA	NA	1.97114	4.75407e-07	ortholog_one2many	58.3871	59.736	25	88.73	1	ortholog
ENSDARG00000006010	ENSG00000168283	bmi1a	BMI1	0.753184	0.00387436	NA	NA	NA	NA	NA	NA	NA	NA	ortholog_many2many	80.0613	81.0559	75	98.19	1	ortholog
ENSDARG00000006029	ENSG00000111144	lta4h	LTA4H	1.28352	7.00933e-05	1.27366	5.41806e-05	NA	NA	NA	NA	NA	NA	ortholog_one2one	63.5025	63.5025	50	93.08	1	ortholog
ENSDARG00000006040	ENSG00000119004	cyp20a1	CYP20A1	0.909197	0.000336402	NA	NA	NA	NA	1.06584	1.49187e-07	0.885108	6.70176e-09	ortholog_one2one	62.7706	62.635	25	84.23	1	ortholog
ENSDARG00000006065	ENSG00000144331	znf385b	ZNF385B	-1.78921	0.0024617	NA	NA	NA	NA	-2.44772	0.0179999	-2.80495	0.0027367	ortholog_one2one	63.1687	58.365	100	88.11	1	ortholog
ENSDARG00000006079	ENSG00000170075	gpr37l1a	GPR37L1	-2.08327	0.0381289	NA	NA	NA	NA	NA	NA	NA	NA	ortholog_one2many	48.6486	47.3684	25	67.6	1	ortholog
ENSDARG00000006093	ENSG00000138395	cdk15	CDK15	-1.42301	0.0241546	-0.727523	4.96517e-05	NA	NA	2.22144	0.0264411	2.57955	0.00149661	ortholog_one2one	54.023	56.2201	100	38.84	1	ortholog
ENSDARG00000006094	ENSG00000197081	igf2r	IGF2R	-1.1415	0.0168031	NA	NA	NA	NA	NA	NA	NA	NA	ortholog_one2one	49.8996	50.549	0	62.83	1	ortholog
ENSDARG00000006112	ENSG00000138119	myof	MYOF	NA	NA	2.2102	4.49126e-05	NA	NA	NA	NA	2.00512	1.75625e-05	ortholog_one2many	65.5992	66.601	0	80.98	1	ortholog
ENSDARG00000006125	ENSG00000141551	csnk1db	CSNK1D	-0.825486	9.99054e-06	NA	NA	-0.640709	5.57217e-21	NA	NA	NA	NA	ortholog_one2many	91.3253	92.665	50	19.44	1	ortholog
ENSDARG00000006174	ENSG00000010626	lrrc23	LRRC23	2.35294	0.036997	2.67643	8.40605e-05	NA	NA	NA	NA	NA	NA	ortholog_one2one	46.0641	48.4663	0	62.22	1	ortholog
ENSDARG00000006181	ENSG00000100644	hif1aa	HIF1A	-1.1803	0.0129877	-0.706371	0.00225554	-0.657546	0.00146833	1.28172	0.00247399	1.55996	3.41832e-06	ortholog_one2many	44.1889	50.9066	0	53.41	1	ortholog
ENSDARG00000006192	ENSG00000167491	gatad2ab	GATAD2A	0.714178	0.00745603	NA	NA	NA	NA	0.941339	8.00234e-06	0.954108	2.38059e-05	ortholog_one2one	55.836	56.0127	50	83.46	1	ortholog
ENSDARG00000006196	ENSG00000151748	sav1	SAV1	1.18937	0.017001	1.25841	0.000121662	NA	NA	NA	NA	NA	NA	ortholog_one2one	67.3629	64.9874	100	60.84	1	ortholog
ENSDARG00000006200	ENSG00000114867	eif4g1a	EIF4G1	0.709045	0.00757573	NA	NA	NA	NA	NA	NA	NA	NA	ortholog_one2many	55.9725	56.4669	50	64.74	1	ortholog
ENSDARG00000006219	ENSG00000163938	gnl3	GNL3	1.38789	8.72978e-05	0.876601	0.000537909	NA	NA	NA	NA	NA	NA	ortholog_one2one	43.7158	42.7808	50	34.41	1	ortholog
ENSDARG00000006220	ENSG00000241635	ugt1a1	UGT1A1	1.89491	0.000553454	NA	NA	NA	NA	NA	NA	NA	NA	ortholog_one2many	51.97	52.7619	0	93.44	1	ortholog
ENSDARG00000006225	ENSG00000123136	ddx39aa	DDX39A	0.889799	0.000177774	NA	NA	NA	NA	1.40594	6.86181e-05	1.73078	2.45115e-11	ortholog_one2many	90.8665	90.8665	0	98.68	1	ortholog
ENSDARG00000006242	ENSG00000112245	ptp4a1	PTP4A1	1.34113	4.75111e-07	NA	NA	NA	NA	NA	NA	NA	NA	ortholog_one2one	90.7514	90.7514	0	100	1	ortholog
ENSDARG00000006253	ENSG00000155545	mier3a	MIER3	-0.781706	0.0434975	NA	NA	NA	NA	NA	NA	NA	NA	ortholog_one2many	62.7273	64.9717	0	86.4	1	ortholog
ENSDARG00000006266	ENSG00000115415	stat1a	STAT1	NA	NA	1.18504	0.0011451	NA	NA	NA	NA	NA	NA	ortholog_one2many	61.3333	61.4152	25	65.41	1	ortholog
ENSDARG00000006272	ENSG00000072415	mpp5a	MPP5	NA	NA	0.761232	0.000195594	NA	NA	NA	NA	NA	NA	ortholog_one2many	77.037	73.9687	75	92.08	1	ortholog
ENSDARG00000006288	ENSG00000138738	prdm5	PRDM5	NA	NA	1.27714	8.26831e-05	0.980195	0.00329167	NA	NA	0.85987	0.00919627	ortholog_one2one	77.9365	77.4448	25	94.74	1	ortholog
ENSDARG00000006290	ENSG00000168653	ndufs5	NDUFS5	1.22405	0.00064045	NA	NA	NA	NA	NA	NA	NA	NA	ortholog_one2one	64.1509	64.1509	25	100	1	ortholog
ENSDARG00000006299	ENSG00000102606	arhgef7a	ARHGEF7	-0.974462	0.0418738	NA	NA	NA	NA	NA	NA	-1.14292	0.000503826	ortholog_one2many	76.3341	76.6007	25	86.88	1	ortholog
ENSDARG00000006300	ENSG00000110801	psmd9	PSMD9	0.695907	0.0150439	NA	NA	NA	NA	NA	NA	NA	NA	ortholog_one2many	49.7758	52.6066	0	58.78	1	ortholog
ENSDARG00000006301	ENSG00000173166	RAPH1	RAPH1	-1.33422	0.00170288	NA	NA	NA	NA	NA	NA	-1.37505	0.000119378	ortholog_one2many	58.16	54.0119	25	95.83	1	ortholog
ENSDARG00000006314	ENSG00000138448	itgav	ITGAV	NA	NA	1.07784	2.57479e-08	NA	NA	0.914301	0.0235241	0.860071	0.0122993	ortholog_one2one	57.9198	58.0861	50	67.93	1	ortholog
ENSDARG00000006316	ENSG00000198242	rpl23a	RPL23A	1.62408	1.97441e-06	0.954477	0.000281076	NA	NA	1.12365	0.000905294	1.43895	3.66009e-08	ortholog_one2one	94.2308	94.8387	25	97.11	1	ortholog
ENSDARG00000006341	ENSG00000169962	tas1r3	TAS1R3	NA	NA	NA	NA	-1.2214	0.0495426	NA	NA	NA	NA	ortholog_one2one	34.0376	34.1176	0	37.11	0	ortholog
ENSDARG00000006392	ENSG00000123737	exosc9	EXOSC9	1.09371	0.000729558	NA	NA	NA	NA	NA	NA	NA	NA	ortholog_one2one	63.5535	70.9924	0	86.31	1	ortholog
ENSDARG00000006396	ENSG00000091129	nrcama	NRCAM	-0.942514	0.0052074	NA	NA	NA	NA	NA	NA	NA	NA	ortholog_one2one	59.816	60.7004	25	77.05	1	ortholog
ENSDARG00000006408	ENSG00000029993	hmgb3b	HMGB3	0.997268	0.000551184	NA	NA	NA	NA	NA	NA	NA	NA	ortholog_one2many	65	65.6566	25	78.3	1	ortholog
ENSDARG00000006413	ENSG00000172809	rpl38	RPL38	1.79306	6.98227e-05	0.778015	0.00156292	NA	NA	NA	NA	0.651647	0.0370613	ortholog_one2one	100	100	100	98.61	1	ortholog
ENSDARG00000006427	ENSG00000145384	fabp2	FABP2	2.43842	0.0139497	NA	NA	NA	NA	NA	NA	NA	NA	ortholog_one2one	66.6667	66.6667	50	87.67	1	ortholog
ENSDARG00000006434	ENSG00000137054	polr1e	POLR1E	0.840323	0.0190383	NA	NA	NA	NA	0.864356	0.0021196	0.746969	0.00333676	ortholog_one2one	39.6181	40.1937	25	44.68	0	ortholog
ENSDARG00000006456	ENSG00000104213	pdgfrl	PDGFRL	NA	NA	2.88346	3.22291e-06	1.95301	4.70579e-05	NA	NA	NA	NA	ortholog_one2one	55.4667	56.0647	100	93.67	1	ortholog
ENSDARG00000006468	ENSG00000100351	grap2a	GRAP2	1.79636	0.00776397	2.14937	1.25488e-09	NA	NA	NA	NA	NA	NA	ortholog_one2many	41.5152	48.2394	25	57.43	1	ortholog
ENSDARG00000006491	ENSG00000138678	agpat9l	GPAT3	1.11561	0.0127813	1.30621	1.14227e-05	NA	NA	-1.86081	0.0386471	NA	NA	ortholog_one2many	73.5023	72.009	0	67.79	1	ortholog
ENSDARG00000006508	ENSG00000107242	pip5k1bb	PIP5K1B	NA	NA	-0.659579	0.0177449	-0.957774	0.000334453	-2.14964	0.00327215	-2.51491	7.95931e-07	ortholog_one2many	72.5926	74.3833	0	53.14	1	ortholog
ENSDARG00000006526	ENSG00000115414	fn1b	FN1	NA	NA	1.51006	0.0207063	NA	NA	NA	NA	3.58565	2.23233e-10	ortholog_one2many	55.4703	54.96	0	70.9	1	ortholog
ENSDARG00000006553	ENSG00000126458	rras	RRAS	1.67168	0.000731331	1.41367	9.68155e-05	NA	NA	NA	NA	1.77452	2.04156e-05	ortholog_one2one	58.2569	64.7959	0	83.44	1	ortholog
ENSDARG00000006584	ENSG00000172943	phf8	PHF8	-0.887781	0.0115621	NA	NA	NA	NA	0.760939	0.0011298	NA	NA	ortholog_one2one	62.793	62.3062	0	78.25	1	ortholog
ENSDARG00000006585	ENSG00000185800	DMWD	DMWD	-1.52329	0.0076329	NA	NA	NA	NA	-0.99274	0.000298864	-1.00062	0.000103833	ortholog_one2one	59.4955	58.6257	0	91.36	1	ortholog
ENSDARG00000006603	ENSG00000159176	csrp1a	CSRP1	4.34871	2.49485e-10	3.05113	5.63415e-13	NA	NA	NA	NA	-1.12177	0.0169446	ortholog_one2many	80.829	81.25	75	100	1	ortholog
ENSDARG00000006642	ENSG00000108591	drg2	DRG2	1.01855	0.00207408	NA	NA	NA	NA	NA	NA	NA	NA	ortholog_one2one	91.4835	91.4835	50	94.2	1	ortholog
ENSDARG00000006677	ENSG00000137275	ripk1l	RIPK1	NA	NA	2.70064	1.62582e-13	0.936519	0.00301962	NA	NA	1.10415	2.68718e-07	ortholog_one2one	38.003	38.5779	0	29.18	0	ortholog
ENSDARG00000006691	ENSG00000197958	rpl12	RPL12	1.46769	9.4559e-05	0.857254	2.46863e-05	NA	NA	1.25032	0.00110182	1.66096	2.63174e-08	ortholog_one2one	90.303	90.303	25	98.92	1	ortholog
ENSDARG00000006747	ENSG00000261115	tmem178b	TMEM178B	-0.744943	0.00376325	NA	NA	NA	NA	NA	NA	-1.22546	0.00981404	ortholog_one2many	82.9932	82.9932	50	100	1	ortholog
ENSDARG00000006754	ENSG00000171843	mllt3	MLLT3	-0.598713	0.0183462	NA	NA	NA	NA	NA	NA	NA	NA	ortholog_one2one	55.8099	57.1171	50	75.14	1	ortholog
ENSDARG00000006760	ENSG00000185052	slc24a3	SLC24A3	-2.33331	0.0140513	NA	NA	NA	NA	NA	NA	NA	NA	ortholog_one2one	66.4596	70.1639	25	67.79	1	ortholog
ENSDARG00000006773	ENSG00000118402	elovl4a	ELOVL4	-1.23896	0.0334119	NA	NA	NA	NA	-1.9835	0.000259313	-2.26011	4.96699e-09	ortholog_one2many	64.9682	66.0194	50	75.88	1	ortholog
ENSDARG00000006775	ENSG00000087589	cass4	CASS4	NA	NA	1.66338	2.50699e-05	NA	NA	NA	NA	NA	NA	ortholog_one2one	30.1527	29.8865	25	42.81	0	ortholog
ENSDARG00000006782	ENSG00000139687	rb1	RB1	NA	NA	0.749703	0.000371739	NA	NA	0.719175	0.0356417	1.0413	0.00153014	ortholog_one2one	53.125	54.5958	0	53.05	1	ortholog
ENSDARG00000006786	ENSG00000005243	copz2	COPZ2	1.04792	0.0137016	NA	NA	NA	NA	NA	NA	1.98141	0.000120593	ortholog_one2one	64.2857	71.4286	50	72.56	1	ortholog
ENSDARG00000006791	ENSG00000133794	arntl1a	ARNTL	NA	NA	NA	NA	1.03002	1.2049e-19	NA	NA	NA	NA	ortholog_one2many	84.6645	84.6645	50	96.99	1	ortholog
ENSDARG00000006797	ENSG00000178425	nt5dc1	NT5DC1	-1.3246	0.00709491	NA	NA	NA	NA	NA	NA	-1.98366	3.65046e-06	ortholog_one2one	62.1978	61.3883	50	83.06	1	ortholog
ENSDARG00000006818	ENSG00000126088	urod	UROD	NA	NA	0.681117	0.00726379	NA	NA	NA	NA	NA	NA	ortholog_one2one	67.8474	67.4797	25	96.91	1	ortholog
ENSDARG00000006840	ENSG00000124713	gnmt	GNMT	2.48903	7.72211e-05	1.01249	0.0233421	NA	NA	NA	NA	NA	NA	ortholog_one2one	71.8644	72.1088	0	100	1	ortholog
ENSDARG00000006848	ENSG00000138496	parp9	PARP9	NA	NA	3.37511	0.000163106	NA	NA	1.25748	0.0355267	2.21143	7.68088e-11	ortholog_one2one	19.0476	25.2019	0	24.36	0	ortholog
ENSDARG00000006849	ENSG00000108684	asic2	ASIC2	NA	NA	-0.614219	0.00453024	NA	NA	-2.83285	0.00851524	-4.50542	3.94867e-07	ortholog_one2one	58.7922	62.1013	0	76.24	1	ortholog
ENSDARG00000006877	ENSG00000001561	enpp4	ENPP4	-1.64343	0.0493209	NA	NA	NA	NA	NA	NA	-1.80128	0.00294254	ortholog_one2one	56.0706	55.3377	0	94.05	1	ortholog
ENSDARG00000006900	ENSG00000178035	impdh2	IMPDH2	1.26846	0.0223818	NA	NA	NA	NA	1.54378	0.000113739	0.949673	1.63645e-06	ortholog_one2one	88.716	88.716	25	98.37	1	ortholog
ENSDARG00000006921	ENSG00000162337	lrp5	LRP5	NA	NA	1.14985	0.000284377	0.987625	1.26934e-06	1.91001	3.66905e-08	1.43023	0.000281671	ortholog_one2one	74.9226	74.9226	50	96.68	1	ortholog
ENSDARG00000006923	ENSG00000141837	cacna1ab	CACNA1A	-0.9698	0.000123665	NA	NA	NA	NA	NA	NA	-2.55383	1.22767e-05	ortholog_one2many	67.917	73.3937	50	53.02	1	ortholog
ENSDARG00000006978	ENSG00000091436	zak	MAP3K20	NA	NA	-0.908641	0.00552858	-0.800634	0.0373807	NA	NA	1.17371	1.81204e-06	ortholog_one2one	58.375	59.1888	100	63.59	1	ortholog
ENSDARG00000006981	ENSG00000103021	ccdc113	CCDC113	NA	NA	1.22628	0.0371559	NA	NA	NA	NA	-0.895026	0.0395509	ortholog_one2one	34.2175	36.0335	0	0	0	ortholog
ENSDARG00000007097	ENSG00000144485	her13	HES6	NA	NA	1.32361	1.22006e-06	1.04381	0.000162141	4.14051	1.34955e-12	1.90099	0.0016377	ortholog_one2many	45.9821	45.9821	0	63.32	1	ortholog
ENSDARG00000007127	ENSG00000120437	acat2	ACAT2	0.590881	0.0323011	-0.773913	0.000153987	NA	NA	NA	NA	NA	NA	ortholog_one2one	71.5365	71.8987	50	95.76	1	ortholog
ENSDARG00000007130	ENSG00000053372	mrto4	MRTO4	2.05248	1.58311e-06	NA	NA	NA	NA	NA	NA	NA	NA	ortholog_one2one	69.8745	69.0083	25	95.01	1	ortholog
ENSDARG00000007136	ENSG00000175137	gtf2h4	SH3BP5L	-1.76623	0.00209743	NA	NA	NA	NA	NA	NA	NA	NA	ortholog_one2many	63.6132	53.7634	0	72.54	1	ortholog
ENSDARG00000007141	ENSG00000165916	psmc3	PSMC3	0.908054	2.63782e-05	NA	NA	NA	NA	NA	NA	NA	NA	ortholog_one2one	90.6606	98.5149	0	97.29	1	ortholog
ENSDARG00000007149	ENSG00000198910	l1cama	L1CAM	-1.71546	0.00659836	NA	NA	NA	NA	NA	NA	-3.54797	3.10544e-05	ortholog_one2one	38.9817	38.5523	0	39.22	0	ortholog
ENSDARG00000007151	ENSG00000082482	kcnk2b	KCNK2	-1.60917	0.0158649	NA	NA	NA	NA	NA	NA	NA	NA	ortholog_one2many	61.5023	68.2292	0	82.64	1	ortholog
ENSDARG00000007172	ENSG00000130827	plxna3	PLXNA3	-1.58582	0.0492915	NA	NA	NA	NA	0.94425	0.00604201	1.03653	0.00274647	ortholog_one2one	73.7039	72.8858	0	90.06	1	ortholog
ENSDARG00000007186	ENSG00000117751	ppp1r8a	PPP1R8	-1.45957	0.00811507	NA	NA	NA	NA	NA	NA	NA	NA	ortholog_one2many	75.7835	75.7835	0	55.03	1	ortholog
ENSDARG00000007195	ENSG00000164082	grm2b	GRM2	-1.10579	0.0244601	NA	NA	NA	NA	-3.15571	0.00137506	-4.19402	2.04754e-11	ortholog_one2many	70.0688	69.9085	25	82.57	1	ortholog
ENSDARG00000007221	ENSG00000168078	pbk	PBK	NA	NA	2.56035	0.000695554	NA	NA	5.6869	7.93626e-08	7.1772	2.70631e-43	ortholog_one2one	65.8385	62.5369	50	87.89	1	ortholog
ENSDARG00000007241	ENSG00000136997	mycb	MYC	2.23329	6.68927e-05	1.08499	0.000993269	NA	NA	2.23237	0.000196899	2.05734	1.47513e-06	ortholog_one2many	53.304	61.1111	50	85.86	1	ortholog
ENSDARG00000007245	ENSG00000108309	rundc3aa	RUNDC3A	-1.11881	0.0280405	NA	NA	NA	NA	-1.85351	0.0036142	-3.52976	5.31406e-09	ortholog_one2many	67.0404	70.5189	0	74.85	1	ortholog
ENSDARG00000007257	ENSG00000144566	rab5ab	RAB5A	-0.75307	0.00492473	NA	NA	NA	NA	NA	NA	NA	NA	ortholog_one2many	92.093	91.6667	0	100	1	ortholog
ENSDARG00000007278	ENSG00000114346	ect2	ECT2	NA	NA	1.6833	4.00692e-05	NA	NA	NA	NA	1.65706	7.24498e-07	ortholog_one2one	68.1619	63.832	50	73.52	1	ortholog
ENSDARG00000007285	ENSG00000173141	mrpl57	MRPL57	1.01554	0.0183723	NA	NA	NA	NA	NA	NA	NA	NA	ortholog_one2one	61.7647	61.165	0	98.56	1	ortholog
ENSDARG00000007302	ENSG00000140600	sh3gl3b	SH3GL3	1.46864	0.0207252	NA	NA	NA	NA	-1.91606	0.0140857	-4.34003	2.00576e-08	ortholog_one2many	59.6542	53.6269	0	17.63	0	ortholog
ENSDARG00000007320	ENSG00000147604	rpl7	RPL7	1.32058	3.956e-08	0.987154	0.000100657	NA	NA	1.34252	0.00053358	1.49967	1.21274e-08	ortholog_one2one	77.0161	77.6423	50	95.93	1	ortholog
ENSDARG00000007323	ENSG00000101421	chmp4bb	CHMP4B	0.777365	0.00290278	NA	NA	NA	NA	NA	NA	NA	NA	ortholog_one2many	82.5893	82.5893	0	67.11	1	ortholog
ENSDARG00000007344	ENSG00000173991	tcap	TCAP	NA	NA	NA	NA	-1.84716	0.000356812	NA	NA	NA	NA	ortholog_one2one	39.521	36.8715	0	0	0	ortholog
ENSDARG00000007347	ENSG00000143753	degs1	DEGS1	0.686248	0.00558237	NA	NA	NA	NA	NA	NA	NA	NA	ortholog_one2one	74.3034	74.3034	25	23.7	0	ortholog
ENSDARG00000007358	ENSG00000186810	cxcr3.1	CXCR3	NA	NA	2.05244	0.00370815	NA	NA	NA	NA	2.02794	0.0203159	ortholog_one2many	39.4022	39.5095	0	79.46	1	ortholog
ENSDARG00000007359	ENSG00000102178	UBL4A	UBL4A	0.614453	0.0409519	NA	NA	NA	NA	-0.944602	0.00377819	NA	NA	ortholog_one2one	59.2357	59.2357	0	57.21	1	ortholog
ENSDARG00000007362	ENSG00000198818	sft2d1	SFT2D1	1.00085	0.00381027	NA	NA	NA	NA	NA	NA	NA	NA	ortholog_one2one	74.8428	73.913	50	72.37	1	ortholog
ENSDARG00000007369	ENSG00000152284	tcf7l1b	TCF7L1	NA	NA	0.663919	0.000703877	NA	NA	2.55674	4.31628e-09	1.98571	4.30301e-07	ortholog_one2many	67.8571	68.2051	0	83.42	1	ortholog
ENSDARG00000007370	ENSG00000135636	dysf	DYSF	NA	NA	1.44628	0.000695554	NA	NA	-1.35005	0.0393516	-2.12286	4.08679e-05	ortholog_one2one	66.2105	66.9051	25	87.74	1	ortholog
ENSDARG00000007377	ENSG00000115758	odc1	ODC1	1.61685	7.03467e-07	1.16301	0.00989838	NA	NA	1.07531	0.00510033	1.92155	2.73786e-09	ortholog_one2one	74.6204	74.6204	50	88.37	1	ortholog
ENSDARG00000007383	ENSG00000099337	kcnk6	KCNK6	NA	NA	0.898667	0.000156449	NA	NA	NA	NA	NA	NA	ortholog_one2one	50.7987	49.0741	0	51.81	1	ortholog
ENSDARG00000007396	ENSG00000115963	rnd3b	RND3	NA	NA	NA	NA	-1.23325	4.93323e-17	NA	NA	1.58738	0.000988861	ortholog_one2many	70.9016	77.2321	0	97.96	1	ortholog
ENSDARG00000007398	ENSG00000154237	lrrk1	LRRK1	-1.52494	0.0037624	NA	NA	NA	NA	-1.35347	0.0168436	-1.37667	0.00462816	ortholog_one2one	41.34	60.4938	100	83.17	1	ortholog
ENSDARG00000007412	ENSG00000117394	slc2a1b	SLC2A1	2.66845	0.000297068	NA	NA	NA	NA	NA	NA	NA	NA	ortholog_one2many	78.6585	79.1411	0	98.89	1	ortholog
ENSDARG00000007429	ENSG00000188566	ndor1	NDOR1	1.25443	0.014798	NA	NA	NA	NA	NA	NA	NA	NA	ortholog_one2one	58.2915	58.4874	0	85.3	1	ortholog
ENSDARG00000007461	ENSG00000196935	srgap1a	SRGAP1	NA	NA	0.702533	0.0006392	NA	NA	1.69805	4.05903e-07	1.11494	0.00060144	ortholog_one2one	82.765	83.6906	25	98.4	1	ortholog
ENSDARG00000007467	ENSG00000152778	ifit10	IFIT5	NA	NA	7.85206	6.86732e-08	2.90904	0.0347676	NA	NA	NA	NA	ortholog_many2many	34.2324	34.2324	100	95.93	1	ortholog
ENSDARG00000007490	ENSG00000043591	adrb1	ADRB1	-1.95419	0.00393724	-1.44518	2.48973e-11	-0.662773	0.000202374	-2.1778	0.00265017	-2.65672	1.38125e-07	ortholog_one2one	50.1048	61.2821	100	71.67	1	ortholog
ENSDARG00000007566	ENSG00000062725	appbp2	APPBP2	-1.04077	0.0489509	NA	NA	NA	NA	NA	NA	-0.670427	9.28381e-05	ortholog_one2one	92.4786	92.3208	0	99.53	1	ortholog
ENSDARG00000007601	ENSG00000101040	zmynd8	ZMYND8	-1.05563	0.00146503	NA	NA	NA	NA	NA	NA	-0.800009	0.000456807	ortholog_one2many	62.8501	63.5304	25	82.06	1	ortholog
ENSDARG00000007603	ENSG00000076944	stxbp2	STXBP2	1.36762	1.8731e-07	0.752101	0.00360638	NA	NA	NA	NA	1.25696	0.00291555	ortholog_one2one	66.6105	66.3866	0	93.58	1	ortholog
ENSDARG00000007624	ENSG00000101003	gins1	GINS1	NA	NA	1.82656	0.000704101	NA	NA	NA	NA	2.53942	1.15192e-11	ortholog_one2one	83.6735	83.6735	25	83.52	1	ortholog
ENSDARG00000007654	ENSG00000073969	nsfa	NSF	-1.12706	0.00764153	NA	NA	NA	NA	-2.58443	1.68767e-05	-2.95613	2.66881e-38	ortholog_one2many	85.4839	85.4839	0	81.47	1	ortholog
ENSDARG00000007682	ENSG00000125534	ppdpfa	PPDPF	2.17626	0.0130466	NA	NA	NA	NA	NA	NA	NA	NA	ortholog_many2many	51.7544	50.4273	25	55.66	1	ortholog
ENSDARG00000007697	ENSG00000164434	fabp7a	FABP7	NA	NA	1.26399	2.06853e-08	NA	NA	NA	NA	2.37786	0.000528088	ortholog_one2many	81.0606	81.0606	0	100	1	ortholog
ENSDARG00000007708	ENSG00000164346	nsa2	NSA2	NA	NA	0.810415	0.00288783	NA	NA	NA	NA	0.64782	0.0113283	ortholog_one2one	94.6154	94.6154	0	99.63	1	ortholog
ENSDARG00000007709	ENSG00000134917	adamts8a	ADAMTS8	5.52892	1.22636e-07	3.43533	6.48025e-11	NA	NA	-1.8508	0.00838822	-2.89581	1.46624e-06	ortholog_one2many	51.856	52.1493	50	84.1	1	ortholog
ENSDARG00000007711	ENSG00000167994	rab3il1	RAB3IL1	1.91495	0.0056245	1.35461	0.00170451	NA	NA	1.10296	0.00472027	NA	NA	ortholog_one2one	57.3298	58.7131	50	75.92	1	ortholog
ENSDARG00000007715	ENSG00000146166	lgsn	LGSN	3.83523	1.30543e-09	1.89042	5.32077e-09	0.885047	0.0480514	NA	NA	NA	NA	ortholog_one2one	49.9018	38.024	25	68.7	1	ortholog
ENSDARG00000007720	ENSG00000113387	sub1b	SUB1	0.988338	0.0120237	NA	NA	NA	NA	NA	NA	NA	NA	ortholog_one2many	68.5039	70.1613	50	49.89	1	ortholog
ENSDARG00000007744	ENSG00000167721	tsr1	TSR1	1.16596	4.89719e-05	NA	NA	NA	NA	NA	NA	NA	NA	ortholog_one2one	18.9055	43.3048	0	71.46	0	ortholog
ENSDARG00000007760	ENSG00000090487	spg21	SPG21	0.986037	0.00715709	NA	NA	NA	NA	0.782676	0.000250918	0.845691	1.50738e-05	ortholog_one2one	84.7403	83.9228	50	89.12	1	ortholog
ENSDARG00000007804	ENSG00000183087	gas6	GAS6	0.828407	0.0278469	1.09724	7.17215e-06	NA	NA	NA	NA	NA	NA	ortholog_one2one	43.3628	45.3704	50	55.94	1	ortholog
ENSDARG00000007813	ENSG00000142327	rnpepl1	RNPEPL1	1.1177	0.0118505	0.827888	0.0103383	NA	NA	0.757517	0.0130048	0.605696	0.0109247	ortholog_one2one	60.8276	63.7283	0	99.81	1	ortholog
ENSDARG00000007823	ENSG00000162772	atf3	ATF3	2.10339	2.75101e-05	1.22467	7.56228e-18	-1.08316	5.594e-06	NA	NA	NA	NA	ortholog_one2one	71.2707	63.8614	50	63.75	1	ortholog
ENSDARG00000007856	ENSG00000185924	rtn4rl1a	RTN4RL1	-1.37023	0.0133384	NA	NA	NA	NA	-3.11658	0.00636622	-4.9676	2.32348e-12	ortholog_one2many	52.6077	55.3699	50	95.39	1	ortholog
ENSDARG00000007863	ENSG00000164548	tra2a	TRA2A	0.585476	0.0444711	NA	NA	NA	NA	NA	NA	NA	NA	ortholog_one2one	83.3333	79.1246	75	47.22	1	ortholog
ENSDARG00000007869	ENSG00000013016	ehd3	EHD3	-2.13691	0.01997	NA	NA	NA	NA	-2.0085	9.77765e-05	-3.1157	1.65073e-16	ortholog_one2one	91.7757	91.7757	0	93.92	1	ortholog
ENSDARG00000007892	ENSG00000071994	pdcd2	PDCD2	0.871484	0.0418532	NA	NA	NA	NA	NA	NA	0.691676	0.0235141	ortholog_one2one	50.2907	48.324	25	70.75	1	ortholog
ENSDARG00000007918	ENSG00000018699	ttc27	TTC27	0.803831	0.00897677	NA	NA	NA	NA	0.830142	0.000132987	0.973569	3.90341e-09	ortholog_one2one	59.0747	59.3564	100	56.86	1	ortholog
ENSDARG00000007950	ENSG00000137809	itga11b	ITGA11	2.12825	0.0236555	NA	NA	NA	NA	NA	NA	NA	NA	ortholog_one2many	54.6296	53.2841	50	46.87	1	ortholog
ENSDARG00000007959	ENSG00000106049	hibadhb	HIBADH	1.02198	4.64193e-05	NA	NA	NA	NA	1.22587	0.000550427	1.10098	0.000214618	ortholog_one2one	75.2976	76.8997	75	89.26	1	ortholog
ENSDARG00000007971	ENSG00000173207	cks1b	CKS1B	2.03168	0.0465486	2.00222	0.000550993	NA	NA	0.974916	0.0264608	2.22947	1.76861e-08	ortholog_one2one	87.3418	87.3418	0	92.18	1	ortholog
ENSDARG00000007990	ENSG00000184937	wt1b	WT1	3.0208	2.44021e-10	2.52568	3.18937e-23	1.61875	3.26307e-05	NA	NA	3.87311	0.0023364	ortholog_one2many	53.6398	67.9612	50	87.03	1	ortholog
ENSDARG00000007996	ENSG00000143190	pou2f1b	POU2F1	-1.41064	0.0144812	NA	NA	NA	NA	0.743731	0.00997489	NA	NA	ortholog_one2many	65.0131	73.6686	50	87.06	1	ortholog
ENSDARG00000008020	ENSG00000108590	med31	MED31	0.677359	0.0276912	NA	NA	NA	NA	NA	NA	NA	NA	ortholog_one2one	83.2061	80.1471	25	82.81	1	ortholog
ENSDARG00000008026	ENSG00000136830	niban2b	NIBAN2	2.65889	0.00237343	1.70356	0.00190297	NA	NA	1.13453	0.0162832	1.56583	0.000359579	ortholog_one2many	54.8257	47.0115	25	71.59	1	ortholog
ENSDARG00000008030	ENSG00000101335	myl9b	MYL9	NA	NA	1.03031	0.00211843	NA	NA	NA	NA	1.70002	0.00356744	ortholog_one2many	94.7674	94.2197	0	100	1	ortholog
ENSDARG00000008068	ENSG00000198498	tma16	TMA16	1.69426	0.00225802	NA	NA	NA	NA	0.638312	0.0129771	0.643981	0.00287561	ortholog_one2one	54.6798	57.2165	50	81.73	1	ortholog
ENSDARG00000008105	ENSG00000087995	mettl2a	METTL2A	0.6584	0.0268057	NA	NA	NA	NA	NA	NA	0.677979	0.00627753	ortholog_one2many	63.2275	67.7054	50	70.04	1	ortholog
ENSDARG00000008107	ENSG00000197122	src	SRC	-1.39178	0.00331688	NA	NA	NA	NA	NA	NA	NA	NA	ortholog_one2one	83.5821	83.8951	0	92.22	1	ortholog
ENSDARG00000008141	ENSG00000080839	rbl1	RBL1	NA	NA	0.83275	5.72432e-06	NA	NA	1.50077	0.000113135	1.77647	8.12359e-12	ortholog_one2one	62.3596	62.949	0	76.37	1	ortholog
ENSDARG00000008142	ENSG00000116266	stxbp3	STXBP3	1.1086	0.0125408	0.77338	0.0182767	NA	NA	NA	NA	NA	NA	ortholog_one2one	58.277	58.4746	0	30.72	0	ortholog
ENSDARG00000008153	ENSG00000164300	serinc5	SERINC5	NA	NA	0.821158	0.0103113	NA	NA	1.60128	0.000598712	NA	NA	ortholog_one2one	60.3037	60.4348	50	84.83	1	ortholog
ENSDARG00000008170	ENSG00000136279	dbnla	DBNL	NA	NA	2.18075	0.00265981	NA	NA	NA	NA	NA	NA	ortholog_one2many	51.6279	44.7581	0	47.88	0	ortholog
ENSDARG00000008192	ENSG00000152782	pank1a	PANK1	-1.84162	0.00286834	NA	NA	NA	NA	NA	NA	-1.38502	2.28406e-05	ortholog_one2many	69.4143	85.7909	50	27.68	1	ortholog
ENSDARG00000008209	ENSG00000186487	myt1la	MYT1L	-1.43045	0.000265206	NA	NA	NA	NA	-2.88484	0.0188868	-5.08484	7.34354e-08	ortholog_one2many	67.4536	63.6436	0	80.96	1	ortholog
ENSDARG00000008238	ENSG00000109323	manba	MANBA	1.36945	0.00584632	1.76101	0.000534908	NA	NA	0.699244	0.0181245	0.739136	0.00445215	ortholog_one2one	53.6974	50.5353	50	69.39	1	ortholog
ENSDARG00000008243	ENSG00000156261	cct8	CCT8	NA	NA	0.622017	0.00179365	NA	NA	NA	NA	NA	NA	ortholog_one2one	84.1241	82.6165	50	99.89	1	ortholog
ENSDARG00000008247	ENSG00000136451	vezf1a	VEZF1	NA	NA	0.70678	0.000216908	NA	NA	1.3496	3.85062e-09	NA	NA	ortholog_one2many	57.3896	61.2705	25	83.31	1	ortholog
ENSDARG00000008249	ENSG00000244694	ptchd4	PTCHD4	-2.2296	0.000126839	-1.01565	2.62256e-06	NA	NA	NA	NA	NA	NA	ortholog_one2one	74.0214	69.5652	50	100	1	ortholog
ENSDARG00000008278	ENSG00000167771	rcor2	RCOR2	-0.873429	0.00304255	-0.703464	2.46863e-05	NA	NA	2.15111	0.00188936	NA	NA	ortholog_one2one	60.0382	58.5821	25	82.24	1	ortholog
ENSDARG00000008279	ENSG00000076984	map2k7	MAP2K7	-1.68269	0.0153631	NA	NA	NA	NA	NA	NA	NA	NA	ortholog_one2one	80.1909	76.7123	0	100	1	ortholog
ENSDARG00000008287	ENSG00000197712	fam114a1	FAM114A1	NA	NA	1.58529	0.000273809	0.747368	0.0365567	NA	NA	1.57561	2.11219e-05	ortholog_one2one	49.3783	50.9158	50	52.01	1	ortholog
ENSDARG00000008292	ENSG00000130741	eif2s3	EIF2S3	0.964109	0.00066473	0.867665	8.9538e-05	NA	NA	NA	NA	0.661083	0.000989234	ortholog_one2many	96.6102	96.6102	0	100	1	ortholog
ENSDARG00000008322	ENSG00000110497	ambra1a	AMBRA1	-1.48024	0.0422328	NA	NA	NA	NA	-0.839849	2.32324e-05	-1.13366	2.27335e-08	ortholog_one2many	57.0878	56.3498	50	85.93	1	ortholog
ENSDARG00000008329	ENSG00000110881	asic1a	ASIC1	-1.27054	0.0472711	NA	NA	NA	NA	NA	NA	NA	NA	ortholog_one2one	64.2045	67.6647	25	89.35	1	ortholog
ENSDARG00000008372	ENSG00000198369	spred2b	SPRED2	-1.69342	0.0038241	NA	NA	NA	NA	NA	NA	NA	NA	ortholog_one2one	67.4641	68.2809	0	90.32	1	ortholog
ENSDARG00000008377	ENSG00000072134	epn2	EPN2	NA	NA	0.755647	0.00145974	NA	NA	NA	NA	NA	NA	ortholog_one2one	64.2123	63.5593	75	89.23	1	ortholog
ENSDARG00000008383	ENSG00000241685	arpc1a	ARPC1A	0.953625	0.00027691	NA	NA	NA	NA	NA	NA	NA	NA	ortholog_one2many	90.5405	90.5405	25	99.12	1	ortholog
ENSDARG00000008388	ENSG00000157227	mmp14b	MMP14	2.3892	3.57386e-06	2.82411	1.29793e-10	1.21691	3.28709e-11	2.03643	0.00899379	3.81567	6.57344e-14	ortholog_one2many	64.9485	60.8696	0	91.19	1	ortholog
ENSDARG00000008395	ENSG00000169371	snupn	SNUPN	0.76663	0.0192496	NA	NA	NA	NA	NA	NA	NA	NA	ortholog_one2one	65	64.1096	100	87.55	1	ortholog
ENSDARG00000008398	ENSG00000151067	cacna1c	CACNA1C	-1.14939	0.0240834	NA	NA	NA	NA	-2.22673	8.76639e-06	-3.12503	7.27624e-09	ortholog_one2one	77.5959	75.5464	50	87.45	1	ortholog
ENSDARG00000008403	ENSG00000173868	phospho1	PHOSPHO1	-2.15306	0.000467263	-1.34729	4.90201e-05	-1.00433	0.000227555	NA	NA	NA	NA	ortholog_one2one	49.8127	47.6702	50	90.88	1	ortholog
ENSDARG00000008434	ENSG00000171552	bcl2l1	BCL2L1	-0.914984	0.0145786	NA	NA	NA	NA	NA	NA	NA	NA	ortholog_one2one	51.5021	50.4202	0	62.66	1	ortholog
ENSDARG00000008447	ENSG00000004478	fkbp4	FKBP4	-1.1334	3.63487e-08	NA	NA	NA	NA	-0.622801	0.02234	-0.869814	0.000156549	ortholog_one2one	59.695	60.8889	0	74.33	1	ortholog
ENSDARG00000008480	ENSG00000166166	trmt61a	TRMT61A	1.11752	0.00837574	NA	NA	NA	NA	NA	NA	NA	NA	ortholog_one2one	70.2422	66.5574	50	99.51	1	ortholog
ENSDARG00000008487	ENSG00000198947	dmd	DMD	-1.05053	0.000727035	NA	NA	NA	NA	NA	NA	-0.946404	0.0320471	ortholog_one2one	13.8128	85.6902	0	79.69	0	ortholog
ENSDARG00000008502	ENSG00000115946	pno1	PNO1	0.999649	0.000918649	0.586864	0.00556339	NA	NA	NA	NA	0.929848	0.000366942	ortholog_one2one	65.4762	65.4762	75	73.7	1	ortholog
ENSDARG00000008503	ENSG00000106415	glcci1a	GLCCI1	-1.33169	0.00270097	NA	NA	NA	NA	1.32776	0.0139873	NA	NA	ortholog_one2one	54.6618	56.3088	50	69.99	1	ortholog
ENSDARG00000008540	ENSG00000125285	sox21b	SOX21	NA	NA	1.64129	1.78267e-14	0.928471	4.32851e-06	1.44985	0.00254715	NA	NA	ortholog_one2one	73.5507	82.8571	50	100	1	ortholog
ENSDARG00000008575	ENSG00000143669	lyst	LYST	-1.6963	0.0110726	NA	NA	NA	NA	NA	NA	NA	NA	ortholog_one2one	44.5146	63.4659	100	68.41	1	ortholog
ENSDARG00000008592	ENSG00000102043	mtmr8	MTMR8	1.33605	0.0239314	1.62014	0.000805263	NA	NA	NA	NA	NA	NA	ortholog_one2one	45.1705	50.3165	100	19.39	1	ortholog
ENSDARG00000008639	ENSG00000075945	kifap3a	KIFAP3	-0.783191	2.74062e-05	NA	NA	NA	NA	-1.0977	4.62576e-05	-1.35941	1.34258e-15	ortholog_one2many	79.798	80.1014	50	93.48	1	ortholog
ENSDARG00000008660	ENSG00000172725	coro1b	CORO1B	-0.702912	0.00685834	NA	NA	NA	NA	1.06008	4.33043e-06	0.810502	3.94335e-05	ortholog_one2one	62.3722	61.1222	0	15.3	0	ortholog
ENSDARG00000008662	ENSG00000182263	fign	FIGN	NA	NA	-0.621725	0.0240678	NA	NA	1.27131	0.013356	1.04533	0.00967506	ortholog_one2one	71.6733	72.8246	50	99.87	1	ortholog
ENSDARG00000008678	ENSG00000112335	snx3	SNX3	0.718103	0.0137929	NA	NA	NA	NA	NA	NA	0.672372	0.0313947	ortholog_one2one	88.2716	88.2716	75	80.51	1	ortholog
ENSDARG00000008723	ENSG00000166501	prkcba	PRKCB	-2.09383	0.00343657	NA	NA	NA	NA	-2.7436	0.00189563	-4.5621	3.85877e-15	ortholog_one2many	76.9688	77.5449	25	68.76	1	ortholog
ENSDARG00000008740	ENSG00000089048	esf1	ESF1	1.19845	0.00243901	NA	NA	NA	NA	0.723783	0.00109628	NA	NA	ortholog_one2one	49.7062	55.8785	25	72.94	1	ortholog
ENSDARG00000008748	ENSG00000177889	ube2na	UBE2N	0.608142	0.0236677	NA	NA	NA	NA	-0.708317	5.53355e-05	NA	NA	ortholog_many2many	96.7105	95.4545	25	100	1	ortholog
ENSDARG00000008765	ENSG00000117500	tmed5	TMED5	2.01717	2.43397e-11	0.89115	0.00880622	NA	NA	NA	NA	0.965284	3.41003e-05	ortholog_one2one	64.6288	65.7778	0	90.11	1	ortholog
ENSDARG00000008790	ENSG00000133627	actr3b	ACTR3B	-2.90947	9.04702e-07	-0.682779	0.00642719	NA	NA	-2.02855	1.4223e-06	-2.02356	2.36965e-13	ortholog_one2many	88.756	87.2941	75	82.73	1	ortholog
ENSDARG00000008805	ENSG00000135336	orc3	ORC3	1.36487	0.000104503	0.954339	0.000329919	NA	NA	NA	NA	NA	NA	ortholog_one2one	46.8354	47.1671	0	70.66	1	ortholog
ENSDARG00000008811	ENSG00000140931	cmtm3	CMTM3	1.38895	0.019527	2.30238	6.73509e-13	0.914716	0.0411778	2.42954	5.36345e-09	3.08974	7.5908e-39	ortholog_one2one	48.9011	52.3529	100	69.82	1	ortholog
ENSDARG00000008816	ENSG00000148672	glud1a	GLUD1	2.14992	0.000136524	2.69019	1.49043e-10	NA	NA	NA	NA	-0.852629	0.00186264	ortholog_many2many	83.6918	85.8456	75	67.75	1	ortholog
ENSDARG00000008840	ENSG00000256269	hmbsa	HMBS	2.28876	1.12386e-08	1.87797	7.47661e-06	0.831601	0.0104588	1.20594	0.000124949	1.06148	7.00835e-05	ortholog_one2many	65.928	66.4804	0	90.72	1	ortholog
ENSDARG00000008867	ENSG00000127314	rap1b	RAP1B	1.02791	0.000229047	0.711826	0.00287184	NA	NA	NA	NA	1.73009	8.85998e-08	ortholog_one2one	95.6522	95.6522	0	27.22	0	ortholog
ENSDARG00000008890	ENSG00000040531	ctns	CTNS	1.01445	0.010632	NA	NA	NA	NA	0.876183	0.000192411	0.685949	0.000295077	ortholog_one2one	59.1281	56.5104	0	67.86	1	ortholog
ENSDARG00000008904	ENSG00000080503	smarca2	SMARCA2	-1.24421	1.12386e-08	NA	NA	NA	NA	-0.801633	0.0200311	-1.53107	1.54715e-07	ortholog_one2many	81.8868	83.0357	50	51.8	1	ortholog
ENSDARG00000008931	ENSG00000102032	renbp	RENBP	1.02669	0.030274	NA	NA	NA	NA	NA	NA	NA	NA	ortholog_one2one	56.6745	60.0496	0	86.37	1	ortholog
ENSDARG00000008936	ENSG00000140612	sec11a	SEC11A	1.45612	5.6933e-06	NA	NA	NA	NA	1.50835	8.74394e-09	1.60559	2.26413e-11	ortholog_one2one	97.2067	97.2067	0	100	1	ortholog
ENSDARG00000008953	ENSG00000101346	pofut1	POFUT1	1.43368	0.00155474	1.0861	0.00171717	NA	NA	1.26469	2.12994e-06	1.59167	1.29876e-10	ortholog_one2one	68.8144	67.5949	75	86.09	1	ortholog
ENSDARG00000008983	ENSG00000148341	sh3glb2a	SH3GLB2	-2.28866	0.000509854	NA	NA	NA	NA	-1.19218	0.00172392	-1.97498	9.71221e-14	ortholog_one2many	69.3671	71.916	0	82.27	1	ortholog
ENSDARG00000008986	ENSG00000165891	e2f7	E2F7	1.46336	0.000707863	1.1569	0.000151601	NA	NA	2.74408	0.0121743	4.74274	5.7079e-23	ortholog_one2one	32.9308	41.4938	50	34.6	1	ortholog
ENSDARG00000009001	ENSG00000143870	pdia6	PDIA6	1.34769	3.67453e-09	0.647046	0.0272599	NA	NA	NA	NA	1.37878	1.41622e-06	ortholog_one2one	76.3636	76.3636	0	98.7	1	ortholog
ENSDARG00000009014	ENSG00000060718	col11a1b	COL11A1	NA	NA	2.04679	0.000902658	NA	NA	NA	NA	NA	NA	ortholog_one2many	74.8616	74.4904	0	55.27	1	ortholog
ENSDARG00000009018	ENSG00000132677	rhbg	RHBG	-2.31145	0.0223795	NA	NA	NA	NA	NA	NA	2.28806	0.00221263	ortholog_one2one	62.0087	61.8736	0	72.63	1	ortholog
ENSDARG00000009020	ENSG00000118432	cnr1	CNR1	-1.84852	0.0429763	NA	NA	NA	NA	-1.93432	0.0174597	NA	NA	ortholog_one2one	70.339	69.8947	50	99.9	1	ortholog
ENSDARG00000009134	ENSG00000136630	hlx1	HLX	1.27181	0.0266237	0.667852	0.0127928	NA	NA	NA	NA	1.66887	0.000334473	ortholog_one2one	42.2131	57.8652	25	59.61	1	ortholog
ENSDARG00000009136	ENSG00000143514	tp53bp2a	TP53BP2	NA	NA	1.03442	0.00064945	NA	NA	NA	NA	NA	NA	ortholog_one2many	58.9065	63.0189	0	70.15	1	ortholog
ENSDARG00000009160	ENSG00000117009	kmo	KMO	1.84968	0.0123812	3.28186	1.33786e-05	NA	NA	NA	NA	NA	NA	ortholog_one2one	58.2305	59.7046	25	81.67	1	ortholog
ENSDARG00000009178	ENSG00000104231	zfand1	ZFAND1	1.20433	0.000584289	NA	NA	NA	NA	NA	NA	NA	NA	ortholog_one2one	60.8209	60.3704	25	88.45	1	ortholog
ENSDARG00000009208	ENSG00000163932	prkcda	PRKCD	NA	NA	-1.05203	2.27554e-06	-0.998194	2.05087e-14	-1.74302	0.00242052	-1.41425	0.000152367	ortholog_one2many	76.3314	75.4386	0	89.9	1	ortholog
ENSDARG00000009212	ENSG00000196262	ppiaa	PPIA	1.83191	5.18697e-07	1.12715	7.17215e-06	NA	NA	NA	NA	1.52505	2.09639e-08	ortholog_many2many	72.7273	73.1707	25	10.72	0	ortholog
ENSDARG00000009217	ENSG00000175662	tom1l2	TOM1L2	-1.63172	0.0137041	NA	NA	NA	NA	-0.787404	0.00734866	-2.10433	8.8435e-16	ortholog_one2many	70.4142	68.1298	25	78.22	1	ortholog
ENSDARG00000009250	ENSG00000105379	etfb	ETFB	0.763603	0.0035399	NA	NA	NA	NA	NA	NA	NA	NA	ortholog_one2one	76.4706	76.7717	25	84.68	1	ortholog
ENSDARG00000009253	ENSG00000087302	rtraf	RTRAF	0.731072	0.0165155	NA	NA	NA	NA	NA	NA	NA	NA	ortholog_one2one	81.9672	82.6446	50	88.72	1	ortholog
ENSDARG00000009262	ENSG00000064763	FAR2	FAR2	-1.64539	0.000150488	NA	NA	NA	NA	-1.24691	0.00958672	NA	NA	ortholog_one2one	60.5825	60.5825	0	68.42	1	ortholog
ENSDARG00000009281	ENSG00000106976	dnm1b	DNM1	-1.65937	0.0128211	NA	NA	NA	NA	-3.33483	0.000764716	-4.15286	2.16576e-16	ortholog_one2many	88.0787	88.6946	0	93.18	1	ortholog
ENSDARG00000009285	ENSG00000174748	rpl15	RPL15	1.74508	4.6272e-09	1.23875	2.19968e-06	NA	NA	NA	NA	NA	NA	ortholog_one2one	95.5882	95.5882	50	100	1	ortholog
ENSDARG00000009299	ENSG00000184545	dusp8a	DUSP8	-1.54018	0.0105777	NA	NA	NA	NA	-2.22346	5.17894e-05	-3.02172	5.35397e-11	ortholog_one2one	46.08	45.787	0	87.78	1	ortholog
ENSDARG00000009311	ENSG00000100362	pvalb6	PVALB	NA	NA	-0.783336	0.0364376	NA	NA	NA	NA	-2.51591	0.0242544	ortholog_one2many	61.8182	62.3853	0	73.33	1	ortholog
ENSDARG00000009313	ENSG00000131400	napsa	NAPSA	3.14284	1.5457e-09	3.07151	5.04277e-09	0.923388	0.000213837	NA	NA	NA	NA	ortholog_one2one	45.2381	46.1165	0	0	0	ortholog
ENSDARG00000009342	ENSG00000239264	txndc5	TXNDC5	NA	NA	0.713353	0.0121187	NA	NA	NA	NA	1.04124	0.0175099	ortholog_one2one	58.1019	62.2829	50	80.62	1	ortholog
ENSDARG00000009351	ENSG00000111241	fgf6a	FGF6	-1.41664	7.39483e-06	-0.733389	0.0049424	NA	NA	NA	NA	NA	NA	ortholog_one2many	62.5	63.4146	75	98.43	1	ortholog
ENSDARG00000009372	ENSG00000176490	diras1b	DIRAS1	-3.02478	0.000711814	-0.893209	0.0326607	NA	NA	-2.07407	0.000581319	-2.10696	1.57436e-07	ortholog_one2many	82.3232	82.3232	50	100	1	ortholog
ENSDARG00000009401	ENSG00000038427	vcanb	VCAN	NA	NA	1.77887	0.000954606	NA	NA	3.03531	1.53097e-08	1.83614	9.32873e-07	ortholog_one2many	17.6973	38.3047	100	19.72	0	ortholog
ENSDARG00000009459	ENSG00000100036	slc35e4	SLC35E4	-2.22443	0.000487455	-0.671602	3.91122e-05	-0.594954	1.01507e-06	-0.867664	0.0126206	-0.878893	0.0196486	ortholog_one2one	49.1429	37.3913	0	72.4	1	ortholog
ENSDARG00000009480	ENSG00000136940	pdcl	PDCL	-0.886971	0.029844	NA	NA	NA	NA	0.779611	9.93703e-05	NA	NA	ortholog_one2one	59.1362	58.1699	0	96.9	1	ortholog
ENSDARG00000009493	ENSG00000073803	MAP3K13	MAP3K13	-2.49844	1.82798e-05	NA	NA	NA	NA	NA	NA	NA	NA	ortholog_one2one	65.4244	64.3585	0	63	1	ortholog
ENSDARG00000009505	ENSG00000101166	prelid3b	PRELID3B	NA	NA	NA	NA	-1.2817	2.33382e-36	NA	NA	1.00055	0.0016867	ortholog_one2one	81.4433	81.8653	0	71.63	1	ortholog
ENSDARG00000009534	ENSG00000116729	wls	WLS	NA	NA	1.44256	3.69642e-10	1.13371	1.4007e-07	1.14456	0.021348	1.39383	9.75674e-06	ortholog_one2one	77.0795	76.9373	50	99.94	1	ortholog
ENSDARG00000009568	ENSG00000154975	ca10b	CA10	0.973082	0.00655678	NA	NA	NA	NA	NA	NA	-2.30457	0.0397257	ortholog_one2many	70.7317	71.1656	0	92.74	1	ortholog
ENSDARG00000009594	ENSG00000174738	nr1d2b	NR1D2	-0.948523	8.74733e-06	NA	NA	-1.2777	5.45808e-68	NA	NA	-1.51487	3.21603e-07	ortholog_one2many	58.2038	58.3045	100	68.29	1	ortholog
ENSDARG00000009626	ENSG00000185189	nrbp2b	NRBP2	-1.29313	0.0193273	NA	NA	NA	NA	NA	NA	-0.92135	0.0128905	ortholog_one2many	60.6786	60.3175	0	76.15	1	ortholog
ENSDARG00000009640	ENSG00000008018	psmb1	PSMB1	1.56236	3.65906e-12	0.907245	0.000131489	NA	NA	NA	NA	0.867032	0.00592186	ortholog_one2one	78.4232	79.7468	0	100	1	ortholog
ENSDARG00000009653	ENSG00000145685	lhfpl2a	LHFPL2	1.48198	0.0224435	0.711374	0.0123036	NA	NA	NA	NA	1.24799	0.000398346	ortholog_one2many	71.4912	72.4444	0	99.42	1	ortholog
ENSDARG00000009689	ENSG00000100592	daam1b	DAAM1	-1.05134	0.0154567	NA	NA	NA	NA	NA	NA	NA	NA	ortholog_one2many	81.9288	81.0936	0	83.2	1	ortholog
ENSDARG00000009733	ENSG00000116852	kif21b	KIF21B	-1.33885	0.0189315	NA	NA	NA	NA	NA	NA	-1.90528	0.00397665	ortholog_one2one	75.0462	75	0	94.64	1	ortholog
ENSDARG00000009738	ENSG00000283228	cacnb4a		-1.67471	0.00540702	NA	NA	NA	NA	NA	NA	NA	NA	ortholog_many2many	72.8448	32.5626	25	64.24	1	ortholog
ENSDARG00000009743	ENSG00000096093	efhc1	EFHC1	2.0048	0.0053714	1.35468	4.99259e-05	NA	NA	0.87621	0.0184432	1.19824	0.000229223	ortholog_one2one	44.375	51.2635	0	57.99	1	ortholog
ENSDARG00000009753	ENSG00000115128	sf3b6	SF3B6	0.760461	0.00810025	NA	NA	NA	NA	1.14126	1.26129e-06	1.1999	3.32232e-09	ortholog_one2one	100	100	0	100	1	ortholog
ENSDARG00000009771	ENSG00000214517	ppme1	PPME1	0.974313	0.000814617	NA	NA	NA	NA	-1.10947	1.26129e-06	-1.08461	1.36505e-10	ortholog_one2one	75.1295	76.9231	0	75.49	1	ortholog
ENSDARG00000009782	ENSG00000133392	myh11a	MYH11	NA	NA	1.17172	0.000263566	NA	NA	NA	NA	-1.81231	0.0166866	ortholog_one2many	80.7809	80.6991	25	84.02	1	ortholog
ENSDARG00000009796	ENSG00000126214	klc1a	KLC1	-1.32883	0.0330781	NA	NA	NA	NA	-1.40533	2.77632e-05	-1.86325	2.38668e-12	ortholog_one2many	82.0244	77.686	75	74.31	1	ortholog
ENSDARG00000009830	ENSG00000115677	hdlbpa	HDLBP	0.926548	4.59081e-07	1.19428	0.000108036	NA	NA	NA	NA	NA	NA	ortholog_one2one	79.1009	78.8522	50	98.78	1	ortholog
ENSDARG00000009844	ENSG00000158716	dusp23a	DUSP23	4.31841	0.01095	NA	NA	NA	NA	NA	NA	NA	NA	ortholog_one2many	58	54.0373	0	91.31	1	ortholog
ENSDARG00000009864	ENSG00000111364	ddx55	DDX55	1.016	0.00361792	NA	NA	NA	NA	NA	NA	NA	NA	ortholog_one2one	74	74.8735	25	97.23	1	ortholog
ENSDARG00000009870	ENSG00000107643	mapk8b	MAPK8	-2.3166	0.00303558	NA	NA	NA	NA	NA	NA	-1.50568	7.96776e-08	ortholog_one2many	77.0492	85.6771	75	60.42	1	ortholog
ENSDARG00000009871	ENSG00000124562	snrpc	SNRPC	0.967597	0.0021248	NA	NA	NA	NA	NA	NA	1.15624	2.54016e-06	ortholog_one2one	83.0189	83.0189	0	98.37	1	ortholog
ENSDARG00000009886	ENSG00000124226	rnf114	RNF114	NA	NA	1.43656	8.29476e-12	NA	NA	0.779421	2.27234e-07	0.78671	2.03772e-05	ortholog_one2one	47.3684	48.8688	25	9.52	0	ortholog
ENSDARG00000009930	ENSG00000175161	cadm2a	CADM2	-1.65569	0.0431992	NA	NA	NA	NA	NA	NA	-1.95073	0.00231634	ortholog_one2many	63.3663	64.6465	25	73.17	1	ortholog
ENSDARG00000009939	ENSG00000165487	micu2	MICU2	1.76358	0.0144513	1.56909	0.000592353	0.831274	0.0311477	NA	NA	NA	NA	ortholog_one2one	34.3318	44.2136	0	57.91	1	ortholog
ENSDARG00000009941	ENSG00000082805	erc1a	ERC1	-0.923433	0.0289022	NA	NA	NA	NA	NA	NA	NA	NA	ortholog_one2many	65.681	74.8723	0	74.32	1	ortholog
ENSDARG00000009942	ENSG00000094804	cdc6	CDC6	1.66661	0.00397266	1.87859	2.76428e-09	0.861155	0.00204488	NA	NA	2.1808	3.69286e-08	ortholog_one2one	49.2857	49.1979	25	56.29	1	ortholog
ENSDARG00000009949	ENSG00000115226	fndc4b	FNDC4	NA	NA	-0.657734	0.000898965	-0.616087	7.65996e-13	NA	NA	NA	NA	ortholog_one2many	50.4273	50.6438	0	68.74	1	ortholog
ENSDARG00000009982	ENSG00000123575	fam199x	FAM199X	-0.803647	0.000464894	NA	NA	NA	NA	NA	NA	-0.856893	8.39809e-05	ortholog_one2one	79.1237	82.0856	0	98.14	1	ortholog
ENSDARG00000010008	ENSG00000026025	vim	VIM	NA	NA	1.28707	1.1391e-07	0.92503	1.57703e-05	1.85533	0.0427318	3.54892	1.50145e-28	ortholog_one2many	68.6695	70.3297	50	94.2	1	ortholog
ENSDARG00000010029	ENSG00000262655	spon1a	SPON1	-1.28543	0.00573708	-0.731849	0.00302278	NA	NA	1.59831	0.014677	NA	NA	ortholog_one2many	76.3321	76.2376	0	85.48	1	ortholog
ENSDARG00000010032	ENSG00000153551	cmtm7	CMTM7	2.82837	6.87375e-08	0.933487	0.0264948	NA	NA	NA	NA	1.81602	5.3344e-05	ortholog_one2one	46.8571	50.6173	0	0	0	ortholog
ENSDARG00000010042	ENSG00000106976	dnm1a	DNM1	-1.93972	0.0397514	NA	NA	NA	NA	-3.33483	0.000764716	-4.15286	2.16576e-16	ortholog_one2many	88.5417	89.7887	75	92.14	1	ortholog
ENSDARG00000010059	ENSG00000143772	itpkb	ITPKB	-2.46027	3.57579e-07	-0.784385	0.000517213	-0.630366	3.31397e-05	NA	NA	NA	NA	ortholog_one2one	37.315	53.7291	25	55.62	1	ortholog
ENSDARG00000010070	ENSG00000168615	adam9	ADAM9	NA	NA	0.868793	0.000551305	NA	NA	0.955238	0.0311353	1.82167	1.94895e-06	ortholog_one2one	60.1954	60.4167	0	64.92	1	ortholog
ENSDARG00000010096	ENSG00000105143	slc1a6	SLC1A6	-1.98917	0.00124105	-0.748343	0.00952736	NA	NA	NA	NA	-3.79577	0.000325885	ortholog_one2one	64.3617	64.8214	0	21.1	0	ortholog
ENSDARG00000010098	ENSG00000152782	pank1b	PANK1	-1.22	0.030784	NA	NA	NA	NA	NA	NA	-1.38502	2.28406e-05	ortholog_one2many	75.4881	77.1619	50	44.58	1	ortholog
ENSDARG00000010113	ENSG00000166136	ndufb8	NDUFB8	0.905813	0.00295844	NA	NA	NA	NA	-0.902328	0.014763	-1.01938	0.000891341	ortholog_one2many	65.5914	64.8936	50	82.21	1	ortholog
ENSDARG00000010144	ENSG00000129951	plppr3a	PLPPR3	NA	NA	NA	NA	0.653885	0.0288211	-1.92661	0.0449853	-2.9995	0.00338533	ortholog_one2many	57.9387	56.9863	0	84.49	1	ortholog
ENSDARG00000010145	ENSG00000198113	tor4aa	TOR4A	NA	NA	1.68503	1.72577e-05	0.695188	0.033944	NA	NA	1.38135	0.00117225	ortholog_one2many	40.4255	40.2353	0	80.12	1	ortholog
ENSDARG00000010154	ENSG00000165633	vstm4a	VSTM4	NA	NA	NA	NA	0.770342	0.0442594	NA	NA	-0.825294	0.0140327	ortholog_one2many	43.4375	42.2492	75	55.92	1	ortholog
ENSDARG00000010169	ENSG00000172936	myd88	MYD88	1.52676	3.59939e-05	1.02075	7.22251e-05	NA	NA	NA	NA	2.21686	3.62071e-18	ortholog_one2one	57.0946	59.507	75	68.12	1	ortholog
ENSDARG00000010181	ENSG00000151693	asap2a	ASAP2	NA	NA	0.613539	0.00910235	NA	NA	NA	NA	NA	NA	ortholog_one2one	73.7575	74.8739	100	63.29	1	ortholog
ENSDARG00000010186	ENSG00000095777	myo3a	MYO3A	NA	NA	0.802027	0.00747576	NA	NA	NA	NA	NA	NA	ortholog_one2one	59.0347	53.7465	25	65.38	1	ortholog
ENSDARG00000010194	ENSG00000063046	eif4bb	EIF4B	1.01168	3.03449e-06	NA	NA	NA	NA	0.887449	0.0115396	NA	NA	ortholog_one2many	57.7741	62.0387	0	68.6	1	ortholog
ENSDARG00000010207	ENSG00000166949	smad3b	SMAD3	-1.17315	0.000976235	NA	NA	NA	NA	NA	NA	-0.732982	0.0250237	ortholog_one2many	93.1765	93.617	100	99.72	1	ortholog
ENSDARG00000010244	ENSG00000163584	rpl22l1	RPL22L1	2.46062	2.66019e-08	1.37392	1.16878e-05	NA	NA	1.6836	0.00148001	2.03762	0.000232793	ortholog_one2one	77.8689	75.3968	50	97.68	1	ortholog
ENSDARG00000010255	ENSG00000110934	bin2b	BIN2	1.62896	0.00192366	1.90085	1.91127e-08	NA	NA	NA	NA	NA	NA	ortholog_one2many	37.3451	40.2672	0	36.86	0	ortholog
ENSDARG00000010279	ENSG00000140497	scamp2	SCAMP2	0.699087	0.00557362	NA	NA	NA	NA	1.13067	9.99526e-06	0.777403	8.62276e-05	ortholog_one2many	57.7508	58.2822	25	60.83	1	ortholog
ENSDARG00000010312	ENSG00000047457	cp	CP	NA	NA	NA	NA	1.88725	0.0160416	NA	NA	2.78697	0.000482191	ortholog_one2one	54.6479	53.5419	75	58.9	1	ortholog
ENSDARG00000010316	ENSG00000172053	qars1	QARS1	1.96626	2.76232e-07	1.01925	6.25018e-05	NA	NA	0.840816	0.000238162	0.823145	1.01358e-06	ortholog_one2one	73.1613	73.2558	0	86.16	1	ortholog
ENSDARG00000010317	ENSG00000169508	gpr183a	GPR183	4.11607	2.49498e-06	2.82293	3.26005e-08	NA	NA	NA	NA	1.24583	0.0384192	ortholog_one2many	52.3546	51.3587	50	94.95	1	ortholog
ENSDARG00000010318	ENSG00000101955	srpx	SRPX	NA	NA	2.97176	0.0344636	NA	NA	3.24849	2.68858e-06	3.55434	5.77804e-07	ortholog_one2one	57.9741	60.0446	75	80.13	1	ortholog
ENSDARG00000010384	ENSG00000184574	lpar5a	LPAR5	2.82303	0.00371948	2.89877	1.38306e-05	NA	NA	NA	NA	NA	NA	ortholog_one2many	28.7634	32.622	0	33.18	0	ortholog
ENSDARG00000010400	ENSG00000093167	lrrfip2	LRRFIP2	0.703709	0.0334119	NA	NA	NA	NA	NA	NA	NA	NA	ortholog_one2one	43.9667	78.2716	0	76.55	1	ortholog
ENSDARG00000010407	ENSG00000119698	ppp4r4	PPP4R4	-0.733257	1.4599e-05	-0.897355	3.88649e-09	-0.738115	2.21791e-29	-2.93967	0.00218345	-5.0886	9.3394e-14	ortholog_one2one	58.1901	58.0571	25	80.27	1	ortholog
ENSDARG00000010425	ENSG00000168079	scara5	SCARA5	NA	NA	1.22026	0.016832	NA	NA	NA	NA	NA	NA	ortholog_one2one	49.4949	49.0982	0	28.13	0	ortholog
ENSDARG00000010432	ENSG00000145088	eaf2	EAF2	1.80987	0.000481329	1.29312	0.00109395	NA	NA	NA	NA	NA	NA	ortholog_one2one	65.7692	66.0232	0	68.02	1	ortholog
ENSDARG00000010445	ENSG00000170638	trabd	TRABD	NA	NA	1.06313	0.001201	NA	NA	NA	NA	NA	NA	ortholog_one2one	62.234	65	25	71.29	1	ortholog
ENSDARG00000010481	ENSG00000082153	bzw1a	BZW1	0.799402	6.19247e-05	NA	NA	NA	NA	NA	NA	0.990525	4.67482e-07	ortholog_one2many	86.1575	86.1575	0	100	1	ortholog
ENSDARG00000010487	ENSG00000142230	sae1	SAE1	0.980932	0.00105499	NA	NA	NA	NA	-0.733857	0.0091002	NA	NA	ortholog_one2one	65.896	65.5172	0	96.15	1	ortholog
ENSDARG00000010515	ENSG00000107404	dvl1a	DVL1	-0.793489	0.0382121	NA	NA	NA	NA	-0.707698	0.0138433	-1.26177	2.84615e-08	ortholog_one2many	52.3741	63.9719	50	51.82	1	ortholog
ENSDARG00000010516	ENSG00000122026	rpl21	RPL21	1.49607	3.71719e-05	0.944304	2.62284e-05	NA	NA	0.870861	0.0393195	1.7421	1.20513e-06	ortholog_one2one	85	85	100	98.83	1	ortholog
ENSDARG00000010519	ENSG00000049246	per3	PER3	-1.85282	8.9625e-05	NA	NA	-2.07996	4.86347e-26	NA	NA	-1.6755	0.000142213	ortholog_one2one	40.5785	38.3294	75	41.81	1	ortholog
ENSDARG00000010531	ENSG00000227500	scamp4	SCAMP4	1.15557	0.000815946	0.945725	0.000467652	NA	NA	NA	NA	NA	NA	ortholog_many2many	59.3886	58.8745	0	62.79	1	ortholog
ENSDARG00000010571	ENSG00000106462	ezh2	EZH2	0.764159	0.0226305	NA	NA	NA	NA	3.32192	2.83515e-07	4.47	2.54419e-30	ortholog_one2one	84.5539	83.5526	50	96.15	1	ortholog
ENSDARG00000010572	ENSG00000148339	slc25a25a	SLC25A25	3.02023	3.49954e-09	1.77908	0.000201765	-0.6753	0.000841117	NA	NA	NA	NA	ortholog_one2many	64.2718	70.5757	50	90.54	1	ortholog
ENSDARG00000010591	ENSG00000139445	foxn4	FOXN4	NA	NA	1.15137	0.0105101	1.20153	0.00565067	NA	NA	1.99076	0.0284788	ortholog_one2one	55.3191	52	50	76.41	1	ortholog
ENSDARG00000010601	ENSG00000166912	mtmr10	MTMR10	-0.686706	0.00961146	NA	NA	NA	NA	NA	NA	-1.11097	3.88804e-05	ortholog_one2one	61.5187	62.4837	0	79.91	1	ortholog
ENSDARG00000010625	ENSG00000155962	clic2	CLIC2	2.48527	1.11875e-10	2.11494	8.8826e-12	NA	NA	NA	NA	1.11022	0.0158871	ortholog_one2one	68.4211	70.7113	0	91.03	1	ortholog
ENSDARG00000010641	ENSG00000144136	slc20a1b	SLC20A1	NA	NA	NA	NA	-0.725127	5.09776e-13	-1.29387	0.000238238	NA	NA	ortholog_one2many	68.3358	69.7744	0	85.04	1	ortholog
ENSDARG00000010654	ENSG00000165895	arhgap42b	ARHGAP42	NA	NA	1.06064	0.00261455	NA	NA	1.71925	0.00037779	1.56297	4.08012e-07	ortholog_one2many	68.8787	69.5954	25	65.95	1	ortholog
ENSDARG00000010655	ENSG00000163644	ppm1k	PPM1K	-0.899342	0.00640997	NA	NA	NA	NA	NA	NA	-1.78537	3.45504e-08	ortholog_one2many	66.9355	66.9355	50	91.14	1	ortholog
ENSDARG00000010658	ENSG00000186480	insig1	INSIG1	NA	NA	-0.981057	0.000302035	-1.07704	8.18355e-37	NA	NA	-0.973173	0.00242202	ortholog_one2one	69.3141	76.494	75	96.58	1	ortholog
ENSDARG00000010710	ENSG00000135097	msi1	MSI1	NA	NA	0.841106	3.09409e-05	0.675617	3.19092e-05	1.64971	1.26129e-06	1.67297	1.15926e-07	ortholog_one2many	64.3646	78.4512	0	87.4	1	ortholog
ENSDARG00000010717	ENSG00000250479	chchd10	CHCHD10	0.833845	0.0278886	NA	NA	NA	NA	NA	NA	-0.896361	0.012252	ortholog_one2one	62.6761	62.2378	25	79.72	1	ortholog
ENSDARG00000010727	ENSG00000141540	ttyh2l	TTYH2	NA	NA	-0.589714	0.0453825	NA	NA	NA	NA	-1.66462	2.80432e-05	ortholog_one2many	61.0487	61.3936	50	93.47	1	ortholog
ENSDARG00000010752	ENSG00000068366	acsl4b	ACSL4	1.0853	0.000383221	0.72919	2.71124e-06	NA	NA	-1.28556	0.00015409	-1.40171	1.44022e-05	ortholog_one2many	67.9104	67.8092	0	85.8	1	ortholog
ENSDARG00000010756	ENSG00000167207	nod2	NOD2	NA	NA	2.01732	4.70925e-06	NA	NA	1.40507	0.0496248	2.32583	2.01756e-05	ortholog_one2one	45.5084	47.0408	100	66.28	1	ortholog
ENSDARG00000010791	ENSG00000198719	dla	DLL1	NA	NA	0.952782	0.00853369	1.03214	4.8428e-06	2.9361	7.71176e-07	NA	NA	ortholog_one2many	64.3154	60.2332	0	86.65	1	ortholog
ENSDARG00000010794	ENSG00000112561	tfeb	TFEB	1.19566	0.0495041	1.31817	6.48103e-07	NA	NA	0.9227	0.0085435	-0.812693	0.00203952	ortholog_one2one	52.7311	50.9128	50	69.88	1	ortholog
ENSDARG00000010844	ENSG00000133703	kras	KRAS	-1.86381	0.00250487	NA	NA	NA	NA	-0.766224	0.00624777	-1.00872	1.42357e-08	ortholog_one2one	87.234	86.7725	25	40.81	0	ortholog
ENSDARG00000010862	ENSG00000145020	amt	AMT	NA	NA	1.10558	0.00329354	NA	NA	NA	NA	NA	NA	ortholog_one2many	63.0273	62.1027	0	82.91	1	ortholog
ENSDARG00000010873	ENSG00000100201	DDX17	DDX17	-1.05033	1.89888e-07	NA	NA	NA	NA	NA	NA	NA	NA	ortholog_one2one	65.8436	71.535	0	71.56	1	ortholog
ENSDARG00000010878	ENSG00000129757	cdkn1ca	CDKN1C	NA	NA	NA	NA	1.1643	0.016566	NA	NA	-1.77016	0.00156723	ortholog_one2one	20	28.7736	0	23.89	0	ortholog
ENSDARG00000010934	ENSG00000143469	syt14a	SYT14	-2.60671	0.000487382	NA	NA	NA	NA	NA	NA	-2.22247	0.000322854	ortholog_one2one	45.6019	68.2842	25	76.26	1	ortholog
ENSDARG00000010941	ENSG00000144647	pomgnt2	POMGNT2	-1.68442	0.0112901	NA	NA	NA	NA	NA	NA	NA	NA	ortholog_one2one	72.2414	71.6239	75	98.2	1	ortholog
ENSDARG00000010946	ENSG00000274276	cbsb	CBSL	NA	NA	NA	NA	-0.690831	1.9234e-10	NA	NA	NA	NA	ortholog_many2many	74.5917	68.8442	25	76.83	1	ortholog
ENSDARG00000010948	ENSG00000138160	kif11	KIF11	NA	NA	3.17821	7.67763e-13	1.00763	0.00357106	2.11703	0.00267547	2.75613	4.09415e-11	ortholog_one2one	48.7689	48.4934	0	45.84	0	ortholog
ENSDARG00000010956	ENSG00000097033	sh3glb1b	SH3GLB1	1.01108	0.00710651	NA	NA	NA	NA	0.687025	0.0428698	0.892809	2.08283e-05	ortholog_one2many	73.1507	74.1667	0	57.71	1	ortholog
ENSDARG00000010962	ENSG00000079150	fkbp7	FKBP7	4.50284	3.08216e-05	4.58509	4.75295e-07	2.6263	0.00350056	1.8327	1.08478e-08	2.45332	5.14108e-09	ortholog_one2one	54.955	54.955	50	96.42	1	ortholog
ENSDARG00000010965	ENSG00000154611	psma8	PSMA8	1.28013	2.18147e-10	0.719375	0.000788563	NA	NA	NA	NA	NA	NA	ortholog_one2one	88.4	88.0478	25	87.61	1	ortholog
ENSDARG00000010981	ENSG00000163812	zdhhc3a	ZDHHC3	-1.27256	0.000385355	NA	NA	NA	NA	NA	NA	NA	NA	ortholog_one2one	71.9064	68.038	50	39.16	1	ortholog
ENSDARG00000011042	ENSG00000177614	pgbd5	PGBD5	-1.88037	0.00859158	NA	NA	NA	NA	-2.26199	0.000112171	-3.13087	2.5775e-14	ortholog_one2one	68.7023	69.4981	100	99.65	1	ortholog
ENSDARG00000011065	ENSG00000058404	camk2b1	CAMK2B	-0.877738	2.16398e-06	NA	NA	NA	NA	-2.87447	0.00127935	-3.55039	3.72552e-09	ortholog_one2many	73.5736	79.288	0	65.48	1	ortholog
ENSDARG00000011072	ENSG00000013573	ddx11	DDX11	NA	NA	1.64432	3.62215e-06	NA	NA	1.30162	0.0249269	1.21906	0.001429	ortholog_one2one	58.7196	59.7753	0	76.95	1	ortholog
ENSDARG00000011079	ENSG00000065183	wdr3	WDR3	0.837349	0.00558821	0.664812	0.00930504	NA	NA	NA	NA	0.717414	0.000762179	ortholog_one2one	71.0498	71.4286	100	89.2	1	ortholog
ENSDARG00000011091	ENSG00000149295	drd2b	DRD2	NA	NA	-1.03704	0.00032233	NA	NA	NA	NA	NA	NA	ortholog_one2many	70.8804	69.469	0	90.06	1	ortholog
ENSDARG00000011094	ENSG00000145386	ccna2	CCNA2	NA	NA	2.7422	4.07945e-19	1.02943	0.0013506	2.28825	0.00523979	3.94695	2.45644e-23	ortholog_one2one	57.1759	54.4053	25	58.14	1	ortholog
ENSDARG00000011125	ENSG00000125835	snrpb	SNRPB	1.14711	0.00128072	NA	NA	NA	NA	NA	NA	1.4084	3.21709e-05	ortholog_one2one	94.3723	91.2134	0	95.98	1	ortholog
ENSDARG00000011152	ENSG00000163684	rpp14	RPP14	0.877831	0.0428545	NA	NA	NA	NA	NA	NA	NA	NA	ortholog_one2one	58.0645	57.6	25	57.56	1	ortholog
ENSDARG00000011157	ENSG00000104880	arhgef18a	ARHGEF18	NA	NA	0.799193	0.0453584	NA	NA	NA	NA	-0.760751	0.0072628	ortholog_one2many	27.6267	40	0	40.07	0	ortholog
ENSDARG00000011163	ENSG00000001617	sema3fa	SEMA3F	NA	NA	-0.65546	0.000917494	NA	NA	NA	NA	1.54092	0.0114391	ortholog_one2many	68.2803	66.9164	50	88.17	1	ortholog
ENSDARG00000011170	ENSG00000165795	ndrg2	NDRG2	-0.887069	0.00278136	NA	NA	NA	NA	NA	NA	-1.20868	0.0229492	ortholog_one2one	69.0027	69.5652	0	58.43	1	ortholog
ENSDARG00000011188	ENSG00000121989	acvr2aa	ACVR2A	-0.803161	0.00572722	-0.667828	0.000124894	NA	NA	-0.820412	0.00351867	-1.01349	5.96912e-05	ortholog_one2many	78.7524	75.0929	75	98.56	1	ortholog
ENSDARG00000011190	ENSG00000077782	fgfr1b	FGFR1	NA	NA	0.738943	0.00108946	0.623584	0.00481443	NA	NA	NA	NA	ortholog_one2many	67.3966	72.3238	0	77.68	1	ortholog
ENSDARG00000011201	ENSG00000177600	rplp2l	RPLP2	2.41856	5.72974e-07	1.41953	5.17728e-06	NA	NA	1.47293	0.00115078	1.33763	3.42756e-06	ortholog_one2one	74.7826	75.4386	0	98.47	1	ortholog
ENSDARG00000011222	ENSG00000160050	ccdc28b	CCDC28B	-1.69964	0.0203962	NA	NA	NA	NA	0.920269	0.0272349	0.866824	0.0101565	ortholog_one2one	59.5	55.8685	25	72.67	1	ortholog
ENSDARG00000011259	ENSG00000134160	trpm1a	TRPM1	5.12807	0.0296818	NA	NA	NA	NA	NA	NA	NA	NA	ortholog_one2many	64.4308	67.7232	0	74.63	1	ortholog
ENSDARG00000011262	ENSG00000183763	traip	TRAIP	NA	NA	1.54919	1.93658e-05	0.874214	0.0224746	NA	NA	1.67312	6.00462e-06	ortholog_one2one	46.4819	48.1236	25	48.98	0	ortholog
ENSDARG00000011272	ENSG00000137288	uqcc2	UQCC2	0.937898	0.0368161	NA	NA	NA	NA	NA	NA	NA	NA	ortholog_one2one	62.6984	61.2403	0	73.65	1	ortholog
ENSDARG00000011317	ENSG00000170214	adra1ba	ADRA1B	-1.86061	0.00104928	NA	NA	NA	NA	-3.17894	0.000137236	-3.89895	1.55489e-14	ortholog_one2many	53.6538	57.4074	50	73.74	1	ortholog
ENSDARG00000011360	ENSG00000176953	nfatc2ip	NFATC2IP	0.710423	0.00677012	NA	NA	NA	NA	NA	NA	NA	NA	ortholog_one2one	23.8663	28.3286	25	14.07	0	ortholog
ENSDARG00000011373	ENSG00000099875	mknk2a	MKNK2	NA	NA	NA	NA	-0.74802	2.80917e-06	NA	NA	NA	NA	ortholog_one2many	75.2688	74.1525	0	87.27	1	ortholog
ENSDARG00000011404	ENSG00000168496	fen1	FEN1	0.846313	0.00971903	0.739542	9.00064e-06	NA	NA	NA	NA	NA	NA	ortholog_one2one	75.2632	75.2632	0	93.5	1	ortholog
ENSDARG00000011405	ENSG00000170889	rps9	RPS9	1.7139	3.19565e-07	1.01724	1.23005e-05	NA	NA	1.09326	0.00397262	1.13725	0.00142198	ortholog_one2one	93.8144	93.8144	0	100	1	ortholog
ENSDARG00000011418	ENSG00000147955	sigmar1	SIGMAR1	1.04903	0.0033479	NA	NA	NA	NA	NA	NA	NA	NA	ortholog_one2one	63.2287	63.5135	50	71.27	1	ortholog
ENSDARG00000011422	ENSG00000196218	ryr1a	RYR1	-1.77041	2.11161e-05	-1.21224	0.00800513	NA	NA	NA	NA	-2.01637	3.62714e-05	ortholog_one2one	76.2803	75.9186	0	90.28	1	ortholog
ENSDARG00000011434	ENSG00000125384	ptger2a	PTGER2	5.70342	0.0410039	2.78728	0.0276082	NA	NA	NA	NA	NA	NA	ortholog_one2many	41.3408	40.2174	100	70.23	1	ortholog
ENSDARG00000011449	ENSG00000182511	fes	FES	NA	NA	-0.595128	0.0124436	NA	NA	NA	NA	0.949582	0.0190934	ortholog_one2one	55.9611	55.6901	0	64.67	1	ortholog
ENSDARG00000011510	ENSG00000179051	rcc2	RCC2	NA	NA	0.841375	1.68951e-08	0.761101	4.6553e-08	0.984229	0.00665196	1.15261	1.37827e-06	ortholog_one2one	74.5211	78.5859	50	84.28	1	ortholog
ENSDARG00000011515	ENSG00000276045	orai1a	ORAI1	NA	NA	1.36475	0.000170817	NA	NA	0.95037	0.0427126	1.3732	3.10326e-05	ortholog_one2many	59.8007	80	50	90.02	1	ortholog
ENSDARG00000011549	ENSG00000186897	c1ql4a	C1QL4	-1.90312	0.000605337	-0.701574	0.0137261	NA	NA	3.30407	0.00636622	1.97733	0.0264724	ortholog_one2many	73.9496	74.2616	0	75.18	1	ortholog
ENSDARG00000011553	ENSG00000116459	atp5pb	ATP5PB	1.0909	0.00052624	NA	NA	NA	NA	NA	NA	NA	NA	ortholog_one2one	54.2969	55.1587	0	72.12	1	ortholog
ENSDARG00000011571	ENSG00000064989	calcrlb	CALCRL	3.37217	0.0284439	2.60492	0.000308253	1.84981	0.00065155	3.36287	4.05903e-07	2.13992	0.000128991	ortholog_one2one	66.1605	65.4506	75	88.42	1	ortholog
ENSDARG00000011582	ENSG00000134532	sox5	SOX5	-1.14325	0.0300064	NA	NA	NA	NA	NA	NA	NA	NA	ortholog_one2one	74.7051	75.0988	0	94.47	1	ortholog
ENSDARG00000011583	ENSG00000008405	cry1b	CRY1	NA	NA	NA	NA	-1.27795	2.0182e-12	0.778507	0.00442174	0.807941	0.00263174	ortholog_one2many	80.0341	77.3927	50	77.46	1	ortholog
ENSDARG00000011594	ENSG00000099956	smarcb1b	SMARCB1	0.820316	0.00637613	NA	NA	NA	NA	NA	NA	NA	NA	ortholog_one2many	90.1299	93.7838	0	55.08	1	ortholog
ENSDARG00000011648	ENSG00000167088	snrpd1	SNRPD1	1.34126	0.00505217	NA	NA	NA	NA	NA	NA	0.698778	0.00445524	ortholog_one2one	97.479	97.479	0	74.84	1	ortholog
ENSDARG00000011703	ENSG00000134852	clocka	CLOCK	-1.52692	0.027719	NA	NA	NA	NA	-0.821674	0.0066294	-1.05788	0.00506574	ortholog_one2many	71.0402	67.3767	75	75.82	1	ortholog
ENSDARG00000011724	ENSG00000155254	marveld1	MARVELD1	NA	NA	NA	NA	-1.10869	0.000205533	NA	NA	1.96262	1.37754e-07	ortholog_one2one	42.1965	45.0617	25	83.88	1	ortholog
ENSDARG00000011727	ENSG00000108641	b9d1	B9D1	0.69271	0.00562132	NA	NA	NA	NA	-0.631013	0.0440547	NA	NA	ortholog_one2one	75	76.1194	50	80.59	1	ortholog
ENSDARG00000011785	ENSG00000149922	tbx6	TBX6	NA	NA	1.29873	0.00261455	NA	NA	1.47773	0.00159627	NA	NA	ortholog_one2one	41.5138	20.7094	0	26.16	0	ortholog
ENSDARG00000011809	ENSG00000135596	mical1	MICAL1	-3.05884	5.14942e-06	NA	NA	NA	NA	1.13088	0.0485906	NA	NA	ortholog_one2one	43.0178	37.4083	0	37.75	0	ortholog
ENSDARG00000011818	ENSG00000156127	batf	BATF	NA	NA	0.652383	3.41235e-07	NA	NA	NA	NA	2.34164	0.000138871	ortholog_one2one	59.2	59.6774	25	82.89	1	ortholog
ENSDARG00000011821	ENSG00000152952	plod2	PLOD2	NA	NA	0.86016	0.0495136	NA	NA	NA	NA	2.08935	2.7912e-06	ortholog_one2one	68.8654	69.2308	100	90.14	1	ortholog
ENSDARG00000011837	ENSG00000147894	C13H9orf72	C9orf72	-1.25158	0.0122323	NA	NA	NA	NA	NA	NA	NA	NA	ortholog_one2one	72.7651	75.7576	25	97.94	1	ortholog
ENSDARG00000011841	ENSG00000167283	atp5l	ATP5MG	1.00199	0.00332272	NA	NA	NA	NA	NA	NA	NA	NA	ortholog_one2many	70.8738	70.8738	0	83.5	1	ortholog
ENSDARG00000011855	ENSG00000115977	aak1a	AAK1	-1.94309	0.0257936	NA	NA	NA	NA	-2.05553	5.33244e-07	-2.6703	1.72892e-23	ortholog_one2many	51.717	58.5395	0	58.15	1	ortholog
ENSDARG00000011863	ENSG00000112655	ptk7a	PTK7	NA	NA	0.792862	0.000349477	0.677974	6.24896e-05	1.65683	7.69449e-05	2.42067	1.48811e-12	ortholog_one2many	58.6916	59.1894	25	91.1	1	ortholog
ENSDARG00000011876	ENSG00000151617	ednraa	EDNRA	2.44121	0.00201679	1.58924	0.00490399	1.07129	0.00054989	1.69426	0.0196217	2.10458	4.11781e-06	ortholog_one2many	62.9977	63.7441	75	40.51	1	ortholog
ENSDARG00000011885	ENSG00000115364	mrpl19	MRPL19	0.834819	0.00205667	NA	NA	NA	NA	NA	NA	NA	NA	ortholog_one2one	58.2192	60.4982	0	71.31	1	ortholog
ENSDARG00000011897	ENSG00000074319	tsg101b	TSG101	NA	NA	1.14194	6.80821e-05	NA	NA	NA	NA	NA	NA	ortholog_one2many	75.641	75.0636	0	82.98	1	ortholog
ENSDARG00000011909	ENSG00000123104	itpr2	ITPR2	NA	NA	0.809846	0.00243288	NA	NA	1.09947	0.0255426	NA	NA	ortholog_one2one	54.6834	73.5558	50	62.08	1	ortholog
ENSDARG00000011921	ENSG00000091164	txnl1	TXNL1	0.849187	0.00540437	NA	NA	NA	NA	NA	NA	NA	NA	ortholog_one2one	74.3945	74.3945	0	94.65	1	ortholog
ENSDARG00000011948	ENSG00000171105	insra	INSR	-0.718668	0.00651317	NA	NA	NA	NA	NA	NA	NA	NA	ortholog_one2many	67.0767	68.5144	0	91.51	1	ortholog
ENSDARG00000011973	ENSG00000116704	slc35d1a	SLC35D1	0.612624	0.0224376	NA	NA	NA	NA	NA	NA	0.72918	0.0157387	ortholog_one2many	72.3944	76.4881	50	100	1	ortholog
ENSDARG00000012002	ENSG00000103042	slc38a7	SLC38A7	0.95801	0.000215222	NA	NA	NA	NA	NA	NA	NA	NA	ortholog_one2one	65.368	64.9462	25	89.21	1	ortholog
ENSDARG00000012030	ENSG00000154099	dnaaf1	DNAAF1	NA	NA	1.6076	0.0309351	NA	NA	-1.79117	0.0100775	-1.64703	0.039044	ortholog_one2one	28.6897	37.0107	0	38.05	0	ortholog
ENSDARG00000012066	ENSG00000011465	dcn	DCN	1.91315	0.000783418	2.80014	5.16279e-06	1.83826	1.10929e-05	NA	NA	1.88745	0.0185424	ortholog_one2one	66.5738	64.0751	75	99.46	1	ortholog
ENSDARG00000012073	ENSG00000163808	kif15	KIF15	NA	NA	1.83677	1.05824e-08	0.749538	0.002266	2.34043	0.000769305	3.2874	1.05913e-13	ortholog_one2one	47.4784	47.8229	0	42.81	0	ortholog
ENSDARG00000012135	ENSG00000153558	fbxl2	FBXL2	-1.08268	0.0124837	NA	NA	NA	NA	-2.02601	8.98341e-05	-2.45688	1.26493e-05	ortholog_one2one	80.6147	78.9352	50	84.53	1	ortholog
ENSDARG00000012177	ENSG00000167578	rab4b	RAB4B	-0.934448	0.000885151	NA	NA	NA	NA	NA	NA	-0.720778	0.0150424	ortholog_one2many	90.6103	90.6103	0	72.9	1	ortholog
ENSDARG00000012196	ENSG00000151422	fer	FER	-1.50528	0.000385355	NA	NA	NA	NA	0.636045	0.0341456	NA	NA	ortholog_one2one	77.3723	73.7819	50	94.75	1	ortholog
ENSDARG00000012204	ENSG00000117266	CDK18	CDK18	-1.89464	0.00145531	NA	NA	NA	NA	NA	NA	-2.09356	0.000325532	ortholog_one2one	77.4262	78.9247	50	71.3	1	ortholog
ENSDARG00000012215	ENSG00000114491	umps	UMPS	1.57796	3.89011e-07	0.807788	0.00997224	NA	NA	NA	NA	0.824102	3.18354e-08	ortholog_one2one	63.125	63.2568	0	96.42	1	ortholog
ENSDARG00000012222	ENSG00000163002	nup35	NUP35	0.877279	0.0205468	NA	NA	NA	NA	1.00389	8.77659e-05	1.33246	1.88153e-08	ortholog_one2one	69.3252	73.3766	50	90.06	1	ortholog
ENSDARG00000012234	ENSG00000131467	psme3	PSME3	1.06887	0.000428174	NA	NA	NA	NA	NA	NA	NA	NA	ortholog_one2one	80.315	79.6875	0	74.88	1	ortholog
ENSDARG00000012247	ENSG00000023892	def6a	DEF6	2.2666	0.000177935	1.35984	0.00798273	NA	NA	NA	NA	0.993061	0.0241521	ortholog_one2many	66.0856	68.1373	0	89.21	1	ortholog
ENSDARG00000012248	ENSG00000182175	rgma	RGMA	-1.04591	0.00370929	NA	NA	NA	NA	1.57741	0.00167163	1.24313	0.0027294	ortholog_one2one	63.1111	63.2517	75	91.23	1	ortholog
ENSDARG00000012271	ENSG00000065600	pacc1	PACC1	NA	NA	1.0804	0.0156478	NA	NA	NA	NA	NA	NA	ortholog_one2one	6.28571	6.26781	25	70.34	0	ortholog
ENSDARG00000012295	ENSG00000074582	bcs1l	BCS1L	0.676332	0.0136301	NA	NA	NA	NA	NA	NA	NA	NA	ortholog_one2one	76.8496	76.6667	50	98.69	1	ortholog
ENSDARG00000012306	ENSG00000019505	syt13	SYT13	NA	NA	-0.886957	0.00269263	-0.910268	2.34296e-31	-3.04218	0.0120402	-4.75589	1.06151e-07	ortholog_one2one	44.1315	44.7619	0	49.68	0	ortholog
ENSDARG00000012347	ENSG00000136274	nacad	NACAD	-0.734301	0.0391571	NA	NA	NA	NA	NA	NA	-1.99634	1.52777e-08	ortholog_one2one	21.1268	17.6471	25	17.49	0	ortholog
ENSDARG00000012353	ENSG00000106018	vipr2	VIPR2	NA	NA	-0.731263	6.86403e-06	-0.627956	0.000471825	3.55144	0.000334353	NA	NA	ortholog_one2one	54.7945	54.4218	0	57.5	1	ortholog
ENSDARG00000012367	ENSG00000163462	trim46a	TRIM46	-1.07654	0.0351093	NA	NA	NA	NA	-1.49873	0.000174625	-1.64369	3.55377e-06	ortholog_one2many	50.3294	49.4179	25	89.41	1	ortholog
ENSDARG00000012369	ENSG00000121039	rdh10b	RDH10	1.08771	0.0269462	NA	NA	NA	NA	NA	NA	3.00745	8.13985e-08	ortholog_one2many	36.6569	37.2024	50	94.26	1	ortholog
ENSDARG00000012390	ENSG00000164626	kcnk5b	KCNK5	NA	NA	2.07448	0.0213779	NA	NA	NA	NA	NA	NA	ortholog_one2many	41.6834	46.4286	0	64.98	1	ortholog
ENSDARG00000012405	ENSG00000108821	col1a1a	COL1A1	NA	NA	3.98581	2.52538e-08	2.22718	3.92491e-12	NA	NA	4.85517	1.41658e-07	ortholog_one2many	77.1858	78.0926	25	94.04	1	ortholog
ENSDARG00000012407	ENSG00000131446	mgat1a	MGAT1	0.836622	0.00970936	NA	NA	NA	NA	NA	NA	0.888401	0.000234126	ortholog_one2many	59.5506	52.7888	0	93.23	1	ortholog
ENSDARG00000012450	ENSG00000062716	vmp1	VMP1	1.99751	4.65205e-15	1.54388	1.84375e-10	NA	NA	NA	NA	1.02276	0.00162276	ortholog_one2one	72.6601	72.6601	75	84.28	1	ortholog
ENSDARG00000012453	ENSG00000184719	rnls	RNLS	0.880125	0.00538117	NA	NA	NA	NA	-1.32083	0.0218347	NA	NA	ortholog_one2one	56.4327	56.1047	100	85.19	1	ortholog
ENSDARG00000012468	ENSG00000081760	aacs	AACS	-1.63721	0.0094208	NA	NA	NA	NA	-2.11943	7.97287e-07	-2.10276	2.56793e-24	ortholog_one2one	77.5298	77.4146	25	100	1	ortholog
ENSDARG00000012485	ENSG00000087586	aurka	AURKA	NA	NA	2.35172	1.17624e-05	NA	NA	1.62667	0.0178584	3.14736	2.10856e-17	ortholog_one2one	56.0794	55.8025	0	39.47	0	ortholog
ENSDARG00000012499	ENSG00000179094	per1b	PER1	-1.10694	0.00669156	NA	NA	-1.2552	7.4281e-23	NA	NA	NA	NA	ortholog_one2many	51.3178	47.3534	0	56.05	1	ortholog
ENSDARG00000012506	ENSG00000176393	rnpep	RNPEP	1.2354	0.000817227	0.792468	0.000645947	NA	NA	0.925213	0.00216806	1.25509	7.33805e-12	ortholog_one2one	61.5385	63.8978	0	77.97	1	ortholog
ENSDARG00000012513	ENSG00000125775	sdcbp2	SDCBP2	NA	NA	0.734029	3.73413e-09	NA	NA	NA	NA	NA	NA	ortholog_many2many	58.9041	57.5251	0	55.49	1	ortholog
ENSDARG00000012534	ENSG00000131389	slc6a6a	SLC6A6	-2.0265	0.00820804	NA	NA	NA	NA	NA	NA	NA	NA	ortholog_one2many	78.871	78.24	25	54.09	1	ortholog
ENSDARG00000012563	ENSG00000164494	pdss2	PDSS2	1.03296	0.000151421	NA	NA	NA	NA	NA	NA	NA	NA	ortholog_one2one	58.8972	63.5135	75	67.46	1	ortholog
ENSDARG00000012572	ENSG00000132664	polr3f	POLR3F	0.824007	0.0096165	NA	NA	NA	NA	NA	NA	NA	NA	ortholog_one2one	87.9747	88.535	50	93.93	1	ortholog
ENSDARG00000012593	ENSG00000130635	col5a1	COL5A1	0.722456	0.0154683	1.45606	0.00021396	NA	NA	NA	NA	3.37703	4.78472e-05	ortholog_one2one	77.9652	71.2581	50	50.04	1	ortholog
ENSDARG00000012603	ENSG00000104131	eif3ja	EIF3J	1.34103	0.0076927	NA	NA	NA	NA	NA	NA	NA	NA	ortholog_one2many	63.1783	65.4618	0	64.24	1	ortholog
ENSDARG00000012723	ENSG00000239306	rbm14a	RBM14	-0.707044	0.00153828	NA	NA	NA	NA	NA	NA	NA	NA	ortholog_one2many	17.4888	24.8408	0	0	0	ortholog
ENSDARG00000012729	ENSG00000180353	hcls1	HCLS1	3.17899	3.42358e-12	2.94189	1.04168e-16	0.707695	0.0167276	NA	NA	1.48408	0.00200254	ortholog_one2one	51.0288	45.2555	25	27.92	0	ortholog
ENSDARG00000012747	ENSG00000157916	rer1	RER1	1.09497	0.000634995	NA	NA	NA	NA	NA	NA	0.598733	0.00296546	ortholog_one2one	83.1633	83.1633	0	100	1	ortholog
ENSDARG00000012776	ENSG00000102038	smarca1	SMARCA1	-0.88424	0.000784718	NA	NA	NA	NA	NA	NA	NA	NA	ortholog_one2one	81.1215	83.7838	50	43.73	1	ortholog
ENSDARG00000012789	ENSG00000100558	plek2	PLEK2	NA	NA	-2.86498	0.0483275	NA	NA	NA	NA	3.15255	1.02676e-10	ortholog_one2one	58.3569	57.0637	0	86.7	1	ortholog
ENSDARG00000012816	ENSG00000181744	dipk2aa	DIPK2A	-1.64293	0.0475066	NA	NA	NA	NA	NA	NA	-1.0541	0.000187728	ortholog_one2many	79.0698	78.7037	25	90.33	1	ortholog
ENSDARG00000012820	ENSG00000101361	nop56	NOP56	1.34151	0.000485996	NA	NA	NA	NA	NA	NA	NA	NA	ortholog_one2one	68.0135	73.7226	0	75.95	1	ortholog
ENSDARG00000012823	ENSG00000080845	dlgap4b	DLGAP4	-1.58098	0.0234822	NA	NA	NA	NA	-0.929165	0.000428941	-0.657684	0.00981614	ortholog_one2many	51.2097	53.9278	25	72.84	1	ortholog
ENSDARG00000012824	ENSG00000005884	itga3b	ITGA3	NA	NA	1.48224	0.00195644	NA	NA	NA	NA	1.64384	0.0207002	ortholog_one2many	44.7193	45.1489	50	58.84	1	ortholog
ENSDARG00000012929	ENSG00000143486	eif2d	EIF2D	0.588854	0.0297231	NA	NA	NA	NA	0.873593	2.30952e-05	0.662171	0.00186299	ortholog_one2one	55.8219	55.2542	25	69.24	1	ortholog
ENSDARG00000012942	ENSG00000082781	itgb5	ITGB5	NA	NA	1.01757	8.68998e-07	0.962304	6.05913e-23	NA	NA	1.16017	0.00796108	ortholog_one2one	70.0876	68.0437	0	83.36	1	ortholog
ENSDARG00000012945	ENSG00000102524	tnfsf13b	TNFSF13B	2.57466	0.00122558	1.08553	0.00540441	NA	NA	2.13777	0.0350761	2.89998	1.35236e-08	ortholog_one2one	35.0877	37.3134	25	46.05	0	ortholog
ENSDARG00000012981	ENSG00000006025	osbpl7	OSBPL7	-1.51405	0.000693338	-0.805758	0.0196605	NA	NA	NA	NA	NA	NA	ortholog_one2one	43.3492	41.1036	75	31.71	1	ortholog
ENSDARG00000013005	ENSG00000182667	opcml	NTM	-1.4151	4.00975e-05	NA	NA	NA	NA	NA	NA	-1.65151	5.44268e-05	ortholog_one2one	52.3944	54.386	25	61.28	1	ortholog
ENSDARG00000013044	ENSG00000178127	ndufv2	NDUFV2	0.705775	0.00647035	NA	NA	NA	NA	NA	NA	NA	NA	ortholog_one2one	77.51	79.0984	100	84.92	1	ortholog
ENSDARG00000013050	ENSG00000140798	abcc12	ABCC12	NA	NA	1.2333	0.0149949	NA	NA	-3.04825	0.0211494	-3.24274	0.00356813	ortholog_one2one	51.7292	51.3889	0	75.66	1	ortholog
ENSDARG00000013056	ENSG00000100605	itpk1a	ITPK1	1.7125	0.0359695	2.1835	0.00888353	NA	NA	NA	NA	-1.85698	3.49039e-09	ortholog_one2many	60.628	63.3838	50	48.77	1	ortholog
ENSDARG00000013063	ENSG00000083720	oxct1a	OXCT1	-0.972765	3.77563e-06	NA	NA	NA	NA	-1.46336	7.75169e-06	-1.88726	1.83753e-14	ortholog_many2many	76.7308	76	75	85.53	1	ortholog
ENSDARG00000013072	ENSG00000102996	mmp15b	MMP15	-1.61805	1.54702e-05	NA	NA	NA	NA	1.08705	0.0413989	NA	NA	ortholog_one2many	61.5845	62.9008	0	90.85	1	ortholog
ENSDARG00000013075	ENSG00000174547	mrpl11	MRPL11	0.954885	0.00107767	NA	NA	NA	NA	0.691547	0.0242384	1.2938	1.12929e-05	ortholog_one2one	61.9792	60.7143	25	59.95	1	ortholog
ENSDARG00000013082	ENSG00000197355	uap1l1	UAP1L1	1.72988	0.00551671	1.19639	0.00450183	NA	NA	NA	NA	NA	NA	ortholog_one2one	64.8915	65.1485	0	72.79	1	ortholog
ENSDARG00000013128	ENSG00000152256	pdk1	PDK1	-1.57476	0.00708527	NA	NA	NA	NA	NA	NA	NA	NA	ortholog_one2one	71.5596	77.037	50	58.08	1	ortholog
ENSDARG00000013144	ENSG00000143153	atp1b1a	ATP1B1	2.27548	8.9625e-05	1.33382	0.00419986	NA	NA	-2.29551	0.00114454	-3.04342	6.34579e-12	ortholog_one2many	58.4158	57.8431	25	66.23	1	ortholog
ENSDARG00000013236	ENSG00000116133	dhcr24	DHCR24	NA	NA	-1.3594	3.05468e-12	-1.23839	1.92841e-13	-1.36925	0.0406508	-1.82776	0.000398538	ortholog_one2one	79.4574	79.4574	50	100	1	ortholog
ENSDARG00000013250	ENSG00000113407	tars1	TARS1	1.26493	6.35874e-07	0.750513	0.000136416	NA	NA	0.596011	0.00939187	NA	NA	ortholog_one2one	84.0941	84.6797	0	96.8	1	ortholog
ENSDARG00000013266	ENSG00000118004	colec11	COLEC11	NA	NA	-0.795132	0.0242374	NA	NA	NA	NA	NA	NA	ortholog_one2one	68.6347	68.6347	50	99.03	1	ortholog
ENSDARG00000013274	ENSG00000151247	eif4eb	EIF4E	3.07333	1.56659e-07	1.6511	0.000498941	0.995107	0.0252035	-0.930693	7.31541e-05	NA	NA	ortholog_one2many	84.3318	84.7222	0	34.02	0	ortholog
ENSDARG00000013307	ENSG00000108298	rpl19	RPL19	1.62039	1.07018e-06	1.01185	1.47874e-05	NA	NA	1.34898	5.23121e-05	1.1569	3.65046e-06	ortholog_one2one	93.8775	93.8775	0	99.2	1	ortholog
ENSDARG00000013317	ENSG00000068976	pygmb	PYGM	-1.56006	0.000265762	NA	NA	NA	NA	NA	NA	-1.99102	0.0074878	ortholog_one2many	82.6603	82.6603	25	99.77	1	ortholog
ENSDARG00000013333	ENSG00000130414	ndufa10	NDUFA10	0.70691	0.000101392	NA	NA	NA	NA	-0.690229	0.00091278	-0.86884	2.296e-13	ortholog_one2one	55.2113	55.2113	0	76.59	1	ortholog
ENSDARG00000013343	ENSG00000162849	kif26ba	KIF26B	-0.963613	5.47977e-05	-0.757451	0.000660524	NA	NA	NA	NA	NA	NA	ortholog_one2one	63.425	62.7994	25	85.97	1	ortholog
ENSDARG00000013389	ENSG00000109158	gabra4	GABRA4	-1.76195	0.0144027	NA	NA	NA	NA	-3.13999	0.0183719	-4.89058	3.88539e-08	ortholog_one2one	68.231	67.8636	0	66.55	1	ortholog
ENSDARG00000013422	ENSG00000183023	slc8a1a	SLC8A1	-1.50229	0.0041006	-0.801646	1.36394e-07	NA	NA	-0.909285	0.0394622	-1.278	6.32123e-05	ortholog_one2many	73.9594	71.517	50	79.52	1	ortholog
ENSDARG00000013430	ENSG00000145692	bhmt	BHMT	NA	NA	NA	NA	2.57328	9.9373e-07	-3.04326	0.0013467	-3.70107	1.30946e-06	ortholog_one2many	76.8473	78	75	93.15	1	ortholog
ENSDARG00000013472	ENSG00000139350	nedd1	NEDD1	NA	NA	0.617954	0.0217493	NA	NA	1.91319	2.72508e-07	1.98008	1.68005e-20	ortholog_many2many	45.4545	44.3131	0	54.8	1	ortholog
ENSDARG00000013475	ENSG00000115484	cct4	CCT4	NA	NA	0.598773	0.00234831	NA	NA	NA	NA	NA	NA	ortholog_one2one	85.1577	86.1163	50	97.67	1	ortholog
ENSDARG00000013476	ENSG00000137135	arhgef39	ARHGEF39	NA	NA	2.16889	1.87267e-05	NA	NA	1.79621	0.00276431	2.59995	2.55879e-09	ortholog_one2one	49.2537	38.6417	0	15.17	0	ortholog
ENSDARG00000013478	ENSG00000067533	rrp15	RRP15	1.08822	0.00147999	NA	NA	NA	NA	NA	NA	NA	NA	ortholog_one2one	45.7447	51.8072	0	61.71	1	ortholog
ENSDARG00000013491	ENSG00000006432	map3k9	MAP3K9	-1.25363	0.0248966	NA	NA	NA	NA	-2.72361	0.00236018	-3.96009	6.01683e-11	ortholog_one2one	37.3188	74.3682	50	59.53	1	ortholog
ENSDARG00000013539	ENSG00000185811	ikzf1	IKZF1	2.14901	0.00177097	1.86139	1.65578e-05	NA	NA	NA	NA	NA	NA	ortholog_one2one	66.0886	65.2091	75	50.77	1	ortholog
ENSDARG00000013576	ENSG00000099860	gadd45bb	GADD45B	NA	NA	-0.767714	0.000935622	-1.5711	1.31712e-13	NA	NA	NA	NA	ortholog_one2many	70	70.8861	50	100	1	ortholog
ENSDARG00000013598	ENSG00000232810	tnfb	TNF	4.47848	0.00849652	4.17044	3.23127e-09	NA	NA	NA	NA	NA	NA	ortholog_many2many	23.176	22.314	0	0	0	ortholog
ENSDARG00000013613	ENSG00000104537	anxa13l	ANXA13	NA	NA	1.27468	1.54489e-13	NA	NA	NA	NA	NA	NA	ortholog_many2many	53.1646	53.1646	0	50.75	1	ortholog
ENSDARG00000013615	ENSG00000167081	pbx3b	PBX3	NA	NA	-0.76327	0.00232441	NA	NA	1.39849	0.00631782	1.75921	3.73442e-08	ortholog_one2one	73.5023	82.6425	75	85.13	1	ortholog
ENSDARG00000013623	ENSG00000165637	vdac2	VDAC2	0.777267	0.000115747	NA	NA	NA	NA	NA	NA	NA	NA	ortholog_one2one	79.932	83.0389	50	81.18	1	ortholog
ENSDARG00000013659	ENSG00000162819	brox	BROX	-1.36997	0.00235403	NA	NA	NA	NA	0.659262	0.000796688	NA	NA	ortholog_one2one	73.9659	73.9659	75	100	1	ortholog
ENSDARG00000013669	ENSG00000125814	napba	NAPB	-2.27985	0.000107353	NA	NA	NA	NA	-2.98619	0.000632419	-4.45883	2.48135e-20	ortholog_one2many	85.5705	86.4407	0	63.86	1	ortholog
ENSDARG00000013670	ENSG00000149428	hyou1	HYOU1	1.00776	3.896e-05	0.724	0.00121583	NA	NA	-0.718564	0.0118258	NA	NA	ortholog_one2one	65.2653	66.5306	25	79.77	1	ortholog
ENSDARG00000013704	ENSG00000143418	cers2a	CERS2	NA	NA	1.33235	1.88925e-07	NA	NA	NA	NA	NA	NA	ortholog_one2many	66.3158	65.7963	0	74.87	1	ortholog
ENSDARG00000013719	ENSG00000075218	gtse1	GTSE1	2.27847	0.0366722	3.30491	3.51846e-11	1.279	0.0239097	3.86693	3.25415e-05	5.17207	1.36291e-28	ortholog_one2one	23.2747	23.6264	0	0	0	ortholog
ENSDARG00000013729	ENSG00000124193	srsf6a	SRSF6	0.593478	0.0405617	NA	NA	NA	NA	NA	NA	NA	NA	ortholog_one2many	61.0465	60.5187	50	76.9	1	ortholog
ENSDARG00000013763	ENSG00000125844	rrbp1a	RRBP1	0.989328	0.00879755	NA	NA	NA	NA	NA	NA	NA	NA	ortholog_one2many	32.695	34.506	50	37.53	1	ortholog
ENSDARG00000013777	ENSG00000104881	ppp1r13l	PPP1R13L	NA	NA	1.29314	0.00766246	NA	NA	1.51788	0.022047	1.14341	0.0157303	ortholog_one2one	32.971	34.8214	0	25.41	0	ortholog
ENSDARG00000013787	ENSG00000164116	gucy1a1	GUCY1A1	NA	NA	NA	NA	-0.590561	5.2909e-13	NA	NA	-2.01162	5.52284e-05	ortholog_one2one	57.5362	58.4683	75	79.9	1	ortholog
ENSDARG00000013794	ENSG00000172059	klf11b	KLF11	2.21791	1.6599e-11	1.8387	1.98953e-07	0.894154	2.94669e-07	NA	NA	NA	NA	ortholog_one2many	42.3828	46.5665	25	67.65	1	ortholog
ENSDARG00000013813	ENSG00000164970	fam219ab	FAM219A	-1.46055	0.00699104	NA	NA	NA	NA	-0.937676	0.0029832	-1.50676	1.33612e-07	ortholog_one2many	85.9459	83.2461	0	88.19	1	ortholog
ENSDARG00000013838	ENSG00000196562	sulf2b	SULF2	-0.646299	0.0257097	NA	NA	NA	NA	2.09747	6.62758e-05	1.08717	0.0244346	ortholog_one2one	73.7931	72.5424	0	79.75	1	ortholog
ENSDARG00000013841	ENSG00000143322	abl2	ABL2	-0.68272	0.0110194	NA	NA	NA	NA	NA	NA	-0.686726	0.0374739	ortholog_one2one	67.2589	70.0441	0	94.11	1	ortholog
ENSDARG00000013860	ENSG00000110536	ptpmt1	PTPMT1	0.723049	0.036997	NA	NA	NA	NA	0.690774	0.0154761	NA	NA	ortholog_one2one	50.2488	55.1913	50	66.47	1	ortholog
ENSDARG00000013861	ENSG00000104442	armc1	ARMC1	-1.11977	0.0100897	NA	NA	NA	NA	NA	NA	NA	NA	ortholog_one2one	77.305	79.2727	100	99.01	1	ortholog
ENSDARG00000013863	ENSG00000234545	fam133b	FAM133B	1.06167	0.0361537	NA	NA	NA	NA	NA	NA	0.925285	0.000114394	ortholog_one2many	56.6802	54.0541	25	30.39	0	ortholog
ENSDARG00000013892	ENSG00000137642	sorl1	SORL1	-0.592701	0.0155078	NA	NA	NA	NA	NA	NA	-1.04869	0.00632203	ortholog_one2one	63.6856	63.7144	0	85.2	1	ortholog
ENSDARG00000013921	ENSG00000073910	frya	FRY	-1.25197	0.000115099	NA	NA	NA	NA	NA	NA	-1.90105	2.90917e-08	ortholog_one2many	76.2363	75.8086	75	84.01	1	ortholog
ENSDARG00000013926	ENSG00000165449	slc16a9a	SLC16A9	3.61719	0.000167557	2.85019	0.00110586	NA	NA	1.81904	0.000127412	NA	NA	ortholog_one2many	51.277	50.9766	50	98.35	1	ortholog
ENSDARG00000013931	ENSG00000149100	eif3m	EIF3M	1.08511	8.21431e-07	0.830396	0.00091094	NA	NA	NA	NA	NA	NA	ortholog_one2one	87.4332	87.2	50	100	1	ortholog
ENSDARG00000013938	ENSG00000277791	psmb3	PSMB3	1.33487	6.576e-07	0.61589	0.010631	NA	NA	NA	NA	0.83437	0.0101566	ortholog_one2one	90.2439	90.2439	0	99.52	1	ortholog
ENSDARG00000013946	ENSG00000116679	ivns1abpb	IVNS1ABP	0.936086	0.0202087	0.881356	0.0154003	NA	NA	0.924474	0.00101422	NA	NA	ortholog_one2many	73.676	73.9062	0	99.47	1	ortholog
ENSDARG00000013961	ENSG00000136868	slc31a1	SLC31A1	1.04136	0.00123198	0.844901	0.0109461	NA	NA	NA	NA	1.13195	2.30799e-08	ortholog_one2one	70	70.7447	50	77.95	1	ortholog
ENSDARG00000013966	ENSG00000100902	psma6b	PSMA6	1.01575	0.000214773	NA	NA	NA	NA	NA	NA	NA	NA	ortholog_one2many	91.0569	91.0569	0	68.36	1	ortholog
ENSDARG00000013968	ENSG00000197746	psap	PSAP	1.0107	0.000257481	1.12415	0.000591429	NA	NA	NA	NA	NA	NA	ortholog_one2one	44.4656	44.8077	0	67.25	1	ortholog
ENSDARG00000014003	ENSG00000130052	stard8	STARD8	NA	NA	0.992386	0.00113195	0.759956	0.000306296	NA	NA	NA	NA	ortholog_one2one	48.9574	50.1859	50	63.47	1	ortholog
ENSDARG00000014004	ENSG00000115211	eif2b4	EIF2B4	0.791083	0.00514826	NA	NA	NA	NA	NA	NA	NA	NA	ortholog_one2one	61.5679	59.6296	0	75.89	1	ortholog
ENSDARG00000014017	ENSG00000167325	rrm1	RRM1	0.869939	0.0404646	1.90362	1.46901e-14	0.729145	1.71819e-07	NA	NA	0.952672	0.000177349	ortholog_one2one	90.5303	90.3023	50	98.08	1	ortholog
ENSDARG00000014058	ENSG00000100228	rab36	RAB36	1.02836	0.00687474	NA	NA	NA	NA	-1.93314	0.0440084	NA	NA	ortholog_one2one	59.5506	60.687	25	63.29	1	ortholog
ENSDARG00000014059	ENSG00000184113	cldn5b	CLDN5	5.5111	1.29461e-10	3.39829	5.00858e-11	1.67204	1.10723e-07	NA	NA	NA	NA	ortholog_one2many	53.211	52.7273	25	71.52	1	ortholog
ENSDARG00000014091	ENSG00000143867	osr1	OSR1	NA	NA	2.10393	0.0227517	2.33118	0.00228005	NA	NA	NA	NA	ortholog_one2one	75.5639	76.1364	50	99.57	1	ortholog
ENSDARG00000014098	ENSG00000118762	pkd2	PKD2	NA	NA	0.993386	0.000208537	0.59775	0.000389617	NA	NA	NA	NA	ortholog_one2one	60.124	64.3805	25	80.81	1	ortholog
ENSDARG00000014106	ENSG00000165410	cfl2	CFL2	2.09106	0.00139272	1.36569	0.0251489	NA	NA	NA	NA	NA	NA	ortholog_one2one	89.1566	89.1566	100	99.42	1	ortholog
ENSDARG00000014138	ENSG00000101473	acot8	ACOT8	0.94769	0.000986286	NA	NA	NA	NA	NA	NA	NA	NA	ortholog_one2one	66.1442	65.9375	0	78.1	1	ortholog
ENSDARG00000014165	ENSG00000114850	ssr3	SSR3	1.59639	8.58411e-06	0.946124	0.000236325	NA	NA	NA	NA	1.04394	0.000395254	ortholog_one2one	91.3513	91.3513	75	100	1	ortholog
ENSDARG00000014169	ENSG00000143858	SYT2	SYT2	-3.66907	1.18198e-06	-0.946928	0.00410826	-1.16083	3.03775e-08	NA	NA	-2.57051	9.79938e-05	ortholog_one2many	43.4368	70.5426	0	67.62	1	ortholog
ENSDARG00000014180	ENSG00000143195	ildr2	ILDR2	NA	NA	1.31092	0.000342394	1.04373	1.4863e-05	NA	NA	NA	NA	ortholog_one2many	37.4022	40.5085	50	56.2	1	ortholog
ENSDARG00000014218	ENSG00000169057	mecp2	MECP2	-2.38451	0.000289738	NA	NA	NA	NA	NA	NA	-1.21296	8.58101e-08	ortholog_one2one	52.8112	50.1908	0	96.92	1	ortholog
ENSDARG00000014230	ENSG00000119689	dlst	DLST	0.598868	0.0232799	NA	NA	NA	NA	NA	NA	NA	NA	ortholog_one2one	73.0684	72.2707	25	73.17	1	ortholog
ENSDARG00000014248	ENSG00000154553	pdlim3b	PDLIM3	NA	NA	2.15253	0.00080814	NA	NA	NA	NA	2.28543	6.40687e-07	ortholog_one2many	49.4506	57.1429	50	57	1	ortholog
ENSDARG00000014274	ENSG00000049541	rfc2	RFC2	1.25951	0.000835408	0.782959	0.00232642	NA	NA	NA	NA	1.68287	2.40835e-10	ortholog_one2one	82.2034	75.7812	0	86.19	1	ortholog
ENSDARG00000014302	ENSG00000198797	brinp2	BRINP2	-1.21844	0.00297435	NA	NA	NA	NA	NA	NA	-1.30301	0.0172779	ortholog_many2many	62.5798	63.3075	50	26.69	1	ortholog
ENSDARG00000014311	ENSG00000142102	pgghg	PGGHG	NA	NA	1.14954	0.00324143	0.845037	0.00102107	NA	NA	1.19108	0.0164614	ortholog_one2one	41.9267	47.1756	0	59.28	1	ortholog
ENSDARG00000014313	ENSG00000154723	atp5pf	ATP5PF	1.15895	0.00738995	NA	NA	NA	NA	NA	NA	NA	NA	ortholog_one2many	49.0741	47.3214	50	0	1	ortholog
ENSDARG00000014329	ENSG00000181163	npm1a	NPM1	3.63433	7.8069e-20	2.20969	2.29264e-06	NA	NA	0.862285	0.00494759	1.31462	5.88293e-09	ortholog_many2many	47.9592	50.5376	25	20.61	0	ortholog
ENSDARG00000014348	ENSG00000081320	stk17b	STK17B	NA	NA	1.64407	5.13095e-08	0.671185	7.2188e-07	2.33791	1.814e-05	2.21211	3.03927e-11	ortholog_one2one	53.2258	55.9322	25	45.94	0	ortholog
ENSDARG00000014378	ENSG00000124067	slc12a4	SLC12A4	NA	NA	1.20096	0.000527086	NA	NA	1.817	1.20025e-07	1.06071	6.52937e-05	ortholog_one2one	81.659	80.9132	0	96.19	1	ortholog
ENSDARG00000014420	ENSG00000196361	elavl3	ELAVL3	-0.613674	0.00481298	NA	NA	NA	NA	NA	NA	-2.13478	0.000338012	ortholog_one2one	87.7384	89.6936	0	99.18	1	ortholog
ENSDARG00000014488	ENSG00000104267	ca2	CA2	-2.02695	1.95181e-05	-0.761784	1.89843e-06	-0.880459	1.77529e-08	NA	NA	NA	NA	ortholog_many2many	61.9231	61.9231	25	40.61	0	ortholog
ENSDARG00000014506	ENSG00000171202	tmem126a	TMEM126A	1.29792	4.19372e-05	NA	NA	NA	NA	NA	NA	NA	NA	ortholog_one2many	40.5128	38.3495	75	49.86	1	ortholog
ENSDARG00000014527	ENSG00000067992	pdk3a	PDK3	-1.78522	0.0112032	NA	NA	NA	NA	-1.1529	0.0332227	NA	NA	ortholog_one2many	81.7734	81.9753	25	51.87	1	ortholog
ENSDARG00000014536	ENSG00000113068	pfdn1	PFDN1	0.855135	0.0150609	NA	NA	NA	NA	NA	NA	NA	NA	ortholog_one2one	77.8689	77.8689	25	100	1	ortholog
ENSDARG00000014550	ENSG00000080298	rfx3	RFX3	-1.77256	0.012693	NA	NA	NA	NA	NA	NA	NA	NA	ortholog_one2one	76.235	74.6405	25	48.01	0	ortholog
ENSDARG00000014588	ENSG00000078295	adcy2b	ADCY2	NA	NA	-0.678709	0.000301062	NA	NA	NA	NA	-1.36829	0.0316861	ortholog_one2many	77.5435	74.2757	75	65.45	1	ortholog
ENSDARG00000014591	ENSG00000143621	ilf2	ILF2	0.92203	0.000136971	NA	NA	NA	NA	0.757409	0.0010042	1.10177	4.8528e-06	ortholog_one2one	87.4359	88.1137	0	94.74	1	ortholog
ENSDARG00000014592	ENSG00000119522	dennd1a	DENND1A	-1.23136	0.0175894	NA	NA	NA	NA	-0.678267	0.00240335	-0.912538	0.000382204	ortholog_one2one	40.0396	79.0607	50	49.76	1	ortholog
ENSDARG00000014646	ENSG00000131480	aoc2	AOC2	NA	NA	0.643661	0.0330047	NA	NA	NA	NA	-1.23834	0.00495016	ortholog_one2many	42.0635	42.6273	25	55.61	1	ortholog
ENSDARG00000014652	ENSG00000198720	ankrd13b	ANKRD13B	-1.29612	0.00420926	NA	NA	NA	NA	NA	NA	-0.837563	0.0442835	ortholog_one2one	71.4058	70.7279	25	79.99	1	ortholog
ENSDARG00000014655	ENSG00000150995	itpr1a	ITPR1	NA	NA	0.716686	0.0136161	NA	NA	-2.51748	0.00618595	-3.054	1.37098e-15	ortholog_one2many	81.4358	81.8215	25	78.81	1	ortholog
ENSDARG00000014680	ENSG00000140548	znf710a	ZNF710	-1.14304	0.0243513	NA	NA	NA	NA	NA	NA	-0.712567	0.0114293	ortholog_one2many	47.8916	44.5378	25	55.17	1	ortholog
ENSDARG00000014685	ENSG00000171320	esco2	ESCO2	NA	NA	3.11232	1.12694e-18	1.04625	0.000187544	3.78731	0.000136845	5.03089	2.56793e-24	ortholog_one2one	37.1048	36.6174	75	29.19	1	ortholog
ENSDARG00000014690	ENSG00000198034	rps4x	RPS4X	1.57662	1.47641e-08	1.18482	4.32081e-06	NA	NA	1.35436	0.000293499	1.40132	4.21188e-05	ortholog_one2many	93.1559	93.1559	50	99.63	1	ortholog
ENSDARG00000014793	ENSG00000110047	ehd1b	EHD1	2.09592	1.27677e-07	2.27705	1.13906e-18	0.714915	2.55759e-06	NA	NA	NA	NA	ortholog_one2many	86.5169	86.8421	0	99.66	1	ortholog
ENSDARG00000014854	ENSG00000068615	reep1	REEP1	-2.15418	0.0115621	NA	NA	NA	NA	-1.65962	0.00210483	-1.83053	9.30215e-05	ortholog_one2one	57.0423	52.5974	25	29.89	0	ortholog
ENSDARG00000014867	ENSG00000161016	rpl8	RPL8	1.54123	1.54687e-07	1.14203	1.87113e-05	NA	NA	1.14302	0.00806834	1.15787	0.000557321	ortholog_one2one	96.8872	96.8872	0	100	1	ortholog
ENSDARG00000014898	ENSG00000114503	ncbp2	NCBP2	0.833417	0.0114788	NA	NA	NA	NA	0.801296	4.65206e-05	0.60389	0.000192208	ortholog_one2many	69.8718	70.3226	0	95.79	1	ortholog
ENSDARG00000014907	ENSG00000166033	htra1b	HTRA1	1.95075	0.0177746	NA	NA	NA	NA	NA	NA	NA	NA	ortholog_one2one	70.8333	71.4286	75	98.44	1	ortholog
ENSDARG00000014929	ENSG00000244165	p2ry11	P2RY11	3.00492	0.0271933	2.79709	0.0143487	NA	NA	NA	NA	NA	NA	ortholog_one2one	31.5508	36.4198	75	37.47	1	ortholog
ENSDARG00000014943	ENSG00000137807	kif23	KIF23	NA	NA	3.24733	5.44743e-09	1.19892	0.0419615	2.3079	0.0215509	4.07296	2.9871e-22	ortholog_one2one	64.3737	72.3183	75	85.56	1	ortholog
ENSDARG00000014946	ENSG00000091879	angpt2a	ANGPT2	2.5797	0.0292035	NA	NA	NA	NA	NA	NA	3.66807	5.38033e-16	ortholog_one2one	55.5556	56.3525	75	74.04	1	ortholog
ENSDARG00000014953	ENSG00000143786	cnih3	CNIH3	-0.833148	0.0229524	-0.882653	0.000866267	NA	NA	NA	NA	NA	NA	ortholog_one2one	80.625	81.1321	50	89.11	1	ortholog
ENSDARG00000014954	ENSG00000173548	snx33	SNX33	NA	NA	2.12123	3.71935e-08	0.921497	4.3871e-06	0.938808	0.00081091	0.806104	0.00404754	ortholog_one2one	73.5192	76.588	75	97.19	1	ortholog
ENSDARG00000014956	ENSG00000184047	diablob	DIABLO	0.924325	0.00870981	NA	NA	NA	NA	0.605752	0.0109901	0.78438	0.000171023	ortholog_one2many	37.2385	36.0324	0	41.04	0	ortholog
ENSDARG00000014995	ENSG00000171135	jagn1b	JAGN1	2.13479	1.62681e-06	1.33898	0.00115705	NA	NA	NA	NA	0.840822	0.00029207	ortholog_one2one	71.5847	71.5847	0	100	1	ortholog
ENSDARG00000015015	ENSG00000157570	tspan18b	TSPAN18	NA	NA	-0.592895	0.0391001	NA	NA	NA	NA	1.70994	0.00939675	ortholog_one2many	69.7581	67.0543	0	98.46	1	ortholog
ENSDARG00000015016	ENSG00000066735	kif26ab	KIF26A	NA	NA	NA	NA	0.627746	1.53959e-05	NA	NA	NA	NA	ortholog_one2many	50.3719	46.8843	25	57.47	1	ortholog
ENSDARG00000015033	ENSG00000170482	slc23a1	SLC23A1	2.24196	0.0305154	NA	NA	NA	NA	NA	NA	NA	NA	ortholog_one2one	72.7425	69.9357	0	88.97	1	ortholog
ENSDARG00000015053	ENSG00000155974	grip1	GRIP1	-0.848716	0.0380184	NA	NA	NA	NA	-1.76429	0.0225072	-3.54868	1.23909e-05	ortholog_one2one	76.0638	75.0656	50	91.7	1	ortholog
ENSDARG00000015070	ENSG00000014138	pola2	POLA2	1.02159	0.0498542	1.69361	1.0723e-07	NA	NA	NA	NA	0.994377	0.000120428	ortholog_one2many	56.3545	56.1667	0	62.61	1	ortholog
ENSDARG00000015088	ENSG00000090520	dnajb11	DNAJB11	0.973371	0.011219	NA	NA	NA	NA	NA	NA	NA	NA	ortholog_one2many	82.4022	81.9444	0	93.6	1	ortholog
ENSDARG00000015110	ENSG00000165646	slc18a2	SLC18A2	NA	NA	-0.735072	0.0110314	NA	NA	NA	NA	-1.19478	0.00843758	ortholog_one2one	73.93	67.6157	25	68.91	1	ortholog
ENSDARG00000015111	ENSG00000123136	ddx39ab	DDX39A	0.894289	7.74375e-05	NA	NA	NA	NA	1.40594	6.86181e-05	1.73078	2.45115e-11	ortholog_one2many	91.1007	91.1007	0	98.58	1	ortholog
ENSDARG00000015128	ENSG00000131469	rpl27	RPL27	1.75374	2.61202e-10	1.17715	7.77704e-06	NA	NA	0.919656	0.0141067	1.5163	0.000161976	ortholog_one2one	95.5882	95.5882	25	100	1	ortholog
ENSDARG00000015156	ENSG00000163520	fbln2	FBLN2	2.1916	0.00456202	NA	NA	NA	NA	-1.93988	0.0212541	NA	NA	ortholog_one2one	43.7855	38.2812	75	51.67	1	ortholog
ENSDARG00000015174	ENSG00000033627	atp6v0a1b	ATP6V0A1	-1.18176	0.0277103	NA	NA	NA	NA	-1.53593	5.96507e-07	-2.2965	4.66389e-25	ortholog_one2many	84.1099	83.9094	25	99.18	1	ortholog
ENSDARG00000015184	ENSG00000161647	mpp3a	MPP3	-0.648002	0.0206242	NA	NA	NA	NA	NA	NA	-0.871883	0.0161481	ortholog_one2many	70.2564	69.5431	0	90.05	1	ortholog
ENSDARG00000015206	ENSG00000153187	hnrnpua	HNRNPU	-0.795201	0.000982166	NA	NA	NA	NA	NA	NA	NA	NA	ortholog_one2many	51.5152	55.9211	50	79.99	1	ortholog
ENSDARG00000015228	ENSG00000197930	ero1a	ERO1A	0.704022	0.0108099	NA	NA	NA	NA	-0.653546	0.0288409	NA	NA	ortholog_one2one	63.6752	60.9407	50	49.87	1	ortholog
ENSDARG00000015240	ENSG00000008086	cdkl5	CDKL5	-0.752231	0.00376749	NA	NA	NA	NA	-2.79669	0.000149058	-4.06404	1.29248e-22	ortholog_one2one	62.0833	55.1852	25	82.95	1	ortholog
ENSDARG00000015252	ENSG00000126091	st3gal3b	ST3GAL3	-0.953753	0.00131752	NA	NA	NA	NA	-0.717858	0.0270246	NA	NA	ortholog_one2many	64	67.4157	25	68.55	1	ortholog
ENSDARG00000015263	ENSG00000148926	adma	ADM	3.49005	7.74934e-06	1.71181	0.00422241	NA	NA	NA	NA	2.22373	0.00105488	ortholog_one2many	31.8919	34.5029	100	0	1	ortholog
ENSDARG00000015278	ENSG00000136040	plxnc1	PLXNC1	2.16508	6.59808e-16	0.950222	0.00051419	NA	NA	NA	NA	NA	NA	ortholog_one2one	29.0179	43.0871	50	18.64	1	ortholog
ENSDARG00000015292	ENSG00000132388	ube2g1a	UBE2G1	0.733965	0.0139174	NA	NA	NA	NA	NA	NA	NA	NA	ortholog_one2one	98.8235	98.8235	75	100	1	ortholog
ENSDARG00000015315	ENSG00000087191	psmc5	PSMC5	0.780195	1.44911e-06	NA	NA	NA	NA	NA	NA	NA	NA	ortholog_one2one	98.0296	98.0296	0	98.15	1	ortholog
ENSDARG00000015325	ENSG00000160201	u2af1	U2AF1	0.656504	0.0101585	NA	NA	NA	NA	NA	NA	NA	NA	ortholog_one2many	95.4167	91.6	0	77.71	1	ortholog
ENSDARG00000015343	ENSG00000142657	pgd	PGD	1.25707	1.04898e-06	0.630708	0.0152101	NA	NA	NA	NA	0.727366	0.00117977	ortholog_one2one	87.5776	82.7789	50	96.75	1	ortholog
ENSDARG00000015355	ENSG00000175592	fosl1a	FOSL1	NA	NA	NA	NA	-1.65397	2.73123e-08	NA	NA	NA	NA	ortholog_one2many	52.3985	41.0405	50	57.41	1	ortholog
ENSDARG00000015374	ENSG00000126091	st3gal3a	ST3GAL3	0.75508	0.0366194	NA	NA	NA	NA	-0.717858	0.0270246	NA	NA	ortholog_one2many	61.3333	61.3333	75	66.16	1	ortholog
ENSDARG00000015394	ENSG00000163634	thoc7	THOC7	1.50919	4.13568e-05	NA	NA	NA	NA	-0.746063	0.00164497	NA	NA	ortholog_one2one	75.4902	76.2376	75	71.86	1	ortholog
ENSDARG00000015422	ENSG00000137168	ppil1	PPIL1	1.91451	7.16984e-05	1.18789	0.000102011	NA	NA	NA	NA	0.947659	0.00402929	ortholog_one2one	84.9398	84.9398	0	85.51	1	ortholog
ENSDARG00000015425	ENSG00000140090	slc24a4a	SLC24A4	-0.829774	0.000743584	-0.622296	0.0105429	NA	NA	NA	NA	-2.42307	0.00156769	ortholog_one2many	64.4695	66.6113	0	71.64	1	ortholog
ENSDARG00000015460	ENSG00000161800	racgap1	RACGAP1	NA	NA	3.07548	1.05729e-11	1.55573	1.46732e-05	1.04571	0.0404283	1.83589	1.60725e-08	ortholog_one2one	66.9304	64.6789	0	80.08	1	ortholog
ENSDARG00000015472	ENSG00000076716	gpc4	GPC4	NA	NA	0.935164	8.20311e-07	0.615175	1.44379e-05	NA	NA	NA	NA	ortholog_one2one	55.036	54.9372	100	53.14	1	ortholog
ENSDARG00000015515	ENSG00000166603	mc4r	MC4R	NA	NA	-0.875922	0.0303125	NA	NA	-2.45546	0.0224713	-3.65055	0.000317414	ortholog_one2one	69.2771	70.5521	25	85.41	1	ortholog
ENSDARG00000015531	ENSG00000050438	slc4a8	SLC4A8	NA	NA	-0.877816	9.34891e-06	-1.2094	1.43271e-10	-1.2174	0.00701387	-1.48861	1.86993e-06	ortholog_one2one	76.3952	75.5656	0	79.76	1	ortholog
ENSDARG00000015540	ENSG00000143801	psen2	PSEN2	-0.587067	0.047746	NA	NA	NA	NA	NA	NA	NA	NA	ortholog_one2many	70.0893	71.2018	0	72.14	1	ortholog
ENSDARG00000015546	ENSG00000162551	alpl	ALPL	-1.59069	0.000344301	-0.679709	0.00112417	-0.618005	6.29171e-12	NA	NA	NA	NA	ortholog_one2one	72.1374	67.3797	50	85.2	1	ortholog
ENSDARG00000015559	ENSG00000163430	fstl1a	FSTL1	4.5578	1.674e-05	3.81462	1.67683e-10	2.30517	2.03415e-05	NA	NA	2.7546	5.2375e-14	ortholog_one2many	63.961	62.7389	25	75.8	1	ortholog
ENSDARG00000015576	ENSG00000148841	itprip	ITPRIP	NA	NA	0.607639	0.0038077	NA	NA	NA	NA	1.24048	0.00218855	ortholog_one2many	44.9726	45.6401	25	87.01	1	ortholog
ENSDARG00000015611	ENSG00000128045	rasl11b	RASL11B	NA	NA	-0.741252	0.0323814	NA	NA	NA	NA	NA	NA	ortholog_one2one	64.5161	65.5738	100	100	1	ortholog
ENSDARG00000015623	ENSG00000093072	ada2b	ADA2	3.90793	6.54454e-09	2.9281	1.05134e-12	NA	NA	NA	NA	NA	NA	ortholog_one2many	45.9883	46.9062	50	77.72	1	ortholog
ENSDARG00000015627	ENSG00000182732	rgs6	RGS6	-1.37744	0.000277821	-0.875825	5.38951e-08	NA	NA	NA	NA	NA	NA	ortholog_one2one	82.0408	82.2086	75	91.32	1	ortholog
ENSDARG00000015628	ENSG00000101843	psmd10	PSMD10	1.86858	6.08289e-05	1.25424	0.00329477	NA	NA	NA	NA	NA	NA	ortholog_one2one	72.1239	72.1239	0	100	1	ortholog
ENSDARG00000015638	ENSG00000092208	gemin2	GEMIN2	0.666404	0.0143353	NA	NA	NA	NA	NA	NA	NA	NA	ortholog_one2one	63.197	65.1341	25	78.54	1	ortholog
ENSDARG00000015676	ENSG00000169251	nmd3	NMD3	1.10968	5.55485e-05	NA	NA	NA	NA	0.769657	0.00115726	0.92933	6.87755e-05	ortholog_one2one	76.3419	76.0396	25	96.97	1	ortholog
ENSDARG00000015707	ENSG00000161202	dvl3a	DVL3	NA	NA	0.747702	0.000196579	0.661672	1.29853e-06	0.672794	0.00196378	NA	NA	ortholog_one2many	68.7151	72.7811	0	79.57	1	ortholog
ENSDARG00000015709	ENSG00000149084	hsd17b12a	HSD17B12	NA	NA	-1.10977	0.000131368	-0.802517	2.38507e-16	NA	NA	NA	NA	ortholog_one2many	59.9359	58.6207	75	51.57	1	ortholog
ENSDARG00000015722	ENSG00000167977	kctd5a	KCTD5	0.809788	0.0079707	NA	NA	NA	NA	1.15355	4.19694e-08	0.733237	0.000386153	ortholog_one2many	80.3419	83.9286	25	71.3	1	ortholog
ENSDARG00000015752	ENSG00000115085	zap70	ZAP70	1.92852	0.00617484	1.40587	0.00880388	NA	NA	NA	NA	1.1337	0.0192971	ortholog_one2one	63.4895	65.0662	0	72.78	1	ortholog
ENSDARG00000015759	ENSG00000000003	tspan7	TSPAN6	NA	NA	1.1871	3.78904e-05	NA	NA	2.27291	6.75338e-11	2.92999	9.16871e-20	ortholog_one2one	57.551	56.1753	0	58.51	1	ortholog
ENSDARG00000015765	ENSG00000134330	iah1	IAH1	1.63985	0.000792491	NA	NA	NA	NA	NA	NA	0.735135	0.0184483	ortholog_one2one	56.8548	59.2437	75	82.15	1	ortholog
ENSDARG00000015805	ENSG00000128849	cgnl1	CGNL1	1.32783	0.0470302	1.25025	0.000219866	0.590409	2.20639e-05	NA	NA	NA	NA	ortholog_one2one	47.7727	47.5899	25	59.93	1	ortholog
ENSDARG00000015807	ENSG00000124209	rab22a	RAB22A	-0.604263	0.0479162	NA	NA	NA	NA	NA	NA	-0.605403	0.00026766	ortholog_one2one	86.5979	85.7143	50	76.86	1	ortholog
ENSDARG00000015829	ENSG00000155363	mov10a	MOV10	0.642373	0.0155292	1.1233	1.72366e-05	NA	NA	0.982655	0.0282428	1.52157	7.54533e-07	ortholog_one2many	43.1705	43.2567	100	43.08	1	ortholog
ENSDARG00000015860	ENSG00000104643	mtmr9	MTMR9	-1.61571	0.030175	NA	NA	NA	NA	-0.98411	0.00100852	-1.70879	1.81805e-13	ortholog_one2one	81.6029	81.6029	0	97.96	1	ortholog
ENSDARG00000015862	ENSG00000122406	rpl5b	RPL5	1.30289	2.34561e-05	0.886307	0.000107775	NA	NA	1.37877	0.000305456	1.54669	2.04719e-05	ortholog_one2many	86.532	86.8243	75	98.62	1	ortholog
ENSDARG00000015901	ENSG00000117569	ptbp2b	PTBP2	0.606208	0.00147892	NA	NA	NA	NA	NA	NA	-1.39215	5.6948e-06	ortholog_one2many	80.791	79.7398	50	72.68	1	ortholog
ENSDARG00000015902	ENSG00000166888	stat6	STAT6	NA	NA	1.82609	4.13154e-15	0.628161	1.42116e-05	-1.2457	0.0102943	NA	NA	ortholog_one2one	32.8217	36.6755	0	24.22	0	ortholog
ENSDARG00000015905	ENSG00000099949	lztr1	LZTR1	-0.772053	0.0182776	NA	NA	NA	NA	NA	NA	NA	NA	ortholog_one2one	80.2381	86.0792	25	92.65	1	ortholog
ENSDARG00000015917	ENSG00000189050	rnft1	RNFT1	0.705286	0.00470085	NA	NA	NA	NA	NA	NA	1.52997	2.42356e-09	ortholog_one2one	45.5172	47.2554	0	67.24	1	ortholog
ENSDARG00000015930	ENSG00000111832	rwdd1	RWDD1	1.28354	0.000174011	0.630209	0.00355777	NA	NA	NA	NA	NA	NA	ortholog_one2one	77.3663	78.3333	100	98.45	1	ortholog
ENSDARG00000015931	ENSG00000065609	snap91b	SNAP91	-1.01828	0.0062	NA	NA	NA	NA	-2.20793	0.0034322	-4.61285	2.5003e-08	ortholog_one2many	39.4708	65.6881	0	32.39	0	ortholog
ENSDARG00000015970	ENSG00000146247	phip	PHIP	-1.25647	0.00886238	NA	NA	NA	NA	NA	NA	NA	NA	ortholog_one2one	67.7101	68.3102	50	61.11	1	ortholog
ENSDARG00000015971	ENSG00000107263	rapgef1b	RAPGEF1	-0.588406	0.0282528	NA	NA	NA	NA	NA	NA	NA	NA	ortholog_one2many	61.2035	65.0673	50	66.09	1	ortholog
ENSDARG00000015978	ENSG00000135940	COX5B	COX5B	1.11211	0.000433991	NA	NA	NA	NA	NA	NA	NA	NA	ortholog_one2many	64.3411	65.873	0	73.62	1	ortholog
ENSDARG00000015998	ENSG00000198554	wdhd1	WDHD1	NA	NA	2.88713	6.0329e-15	1.11988	0.00118275	NA	NA	1.26695	0.000412765	ortholog_one2one	58.3702	59.2626	50	68.38	1	ortholog
ENSDARG00000016022	ENSG00000139800	zic5	ZIC5	NA	NA	NA	NA	0.767718	0.030659	NA	NA	NA	NA	ortholog_one2one	50.9804	68.008	25	93.95	1	ortholog
ENSDARG00000016044	ENSG00000147536	gins4	GINS4	2.22029	0.0108099	2.8751	3.83072e-08	NA	NA	1.40683	0.011795	2.07742	2.83934e-08	ortholog_one2one	69.0583	70.9677	0	81.72	1	ortholog
ENSDARG00000016048	ENSG00000138678	gpat3	GPAT3	1.4124	0.007197	1.67501	0.000459012	NA	NA	-1.86081	0.0386471	NA	NA	ortholog_one2many	73.0415	70.4444	75	63.24	1	ortholog
ENSDARG00000016122	ENSG00000184924	ptrhd1	PTRHD1	2.08681	1.25307e-05	0.633366	0.0496536	NA	NA	NA	NA	0.840147	0.0205076	ortholog_one2one	52.8571	58.7302	0	76.53	1	ortholog
ENSDARG00000016153	ENSG00000173402	dag1	DAG1	-0.747473	0.0295189	NA	NA	NA	NA	0.751729	0.0235293	0.764196	0.0109917	ortholog_one2one	58.8827	60.8545	0	88.53	1	ortholog
ENSDARG00000016154	ENSG00000185650	zfp36l1a	ZFP36L1	NA	NA	1.71531	1.3519e-13	0.968858	1.48889e-09	NA	NA	0.903153	0.00827832	ortholog_one2many	64.7929	58.5561	0	93.57	1	ortholog
ENSDARG00000016156	ENSG00000189319	fam53b	FAM53B	1.55261	1.4597e-05	1.057	0.000134882	NA	NA	NA	NA	-1.67467	1.92925e-07	ortholog_one2one	38.1517	42.4802	25	42.62	0	ortholog
ENSDARG00000016160	ENSG00000137198	gmpr	GMPR	NA	NA	-0.766732	0.000703877	-1.2774	4.87242e-07	NA	NA	1.46282	0.0158871	ortholog_one2one	77.1014	77.1014	25	88.42	1	ortholog
ENSDARG00000016161	ENSG00000120262	ccdc170	CCDC170	3.81575	0.0202358	1.61912	0.0158469	NA	NA	NA	NA	NA	NA	ortholog_one2one	8.81119	25	100	10.99	0	ortholog
ENSDARG00000016173	ENSG00000163468	cct3	CCT3	0.70164	0.00280178	NA	NA	NA	NA	NA	NA	NA	NA	ortholog_one2one	84.7706	85.0829	0	97.86	1	ortholog
ENSDARG00000016188	ENSG00000064932	SBNO2	SBNO2	3.3964	7.30682e-14	3.35004	3.74426e-18	1.11524	1.08289e-05	NA	NA	1.05207	0.0201659	ortholog_one2many	59.8829	56.3361	0	63	1	ortholog
ENSDARG00000016200	ENSG00000101255	trib3	TRIB3	1.3204	0.00775926	0.650373	0.0130478	NA	NA	NA	NA	2.2772	4.96918e-06	ortholog_one2one	48.8827	50.2874	0	61.17	1	ortholog
ENSDARG00000016239	ENSG00000185627	psmd13	PSMD13	1.08633	1.05803e-05	NA	NA	NA	NA	NA	NA	NA	NA	ortholog_one2one	77.1277	76.7196	25	99.91	1	ortholog
ENSDARG00000016280	ENSG00000175376	eif1ad	EIF1AD	0.900705	0.0135174	NA	NA	NA	NA	NA	NA	NA	NA	ortholog_one2one	59.3939	56.9767	0	60.87	1	ortholog
ENSDARG00000016304	ENSG00000198176	tfdp1b	TFDP1	1.19074	0.000313767	NA	NA	NA	NA	0.843208	0.00178886	1.04235	0.000526491	ortholog_one2many	60	63.8961	75	59.46	1	ortholog
ENSDARG00000016318	ENSG00000155868	med7	MED7	0.833224	0.0172095	NA	NA	NA	NA	NA	NA	NA	NA	ortholog_one2one	78.97	76.3485	50	100	1	ortholog
ENSDARG00000016368	ENSG00000176261	zbtb8os	ZBTB8OS	1.0021	0.00490832	NA	NA	NA	NA	NA	NA	NA	NA	ortholog_one2one	71.2575	73.4568	0	78.74	1	ortholog
ENSDARG00000016375	ENSG00000070669	asns	ASNS	1.20255	0.00123663	NA	NA	NA	NA	-1.07286	0.00344014	NA	NA	ortholog_one2one	70.9447	71.0714	50	98.24	1	ortholog
ENSDARG00000016396	ENSG00000164970	fam219aa	FAM219A	-1.68449	0.0359092	NA	NA	NA	NA	-0.937676	0.0029832	-1.50676	1.33612e-07	ortholog_one2many	87.5676	87.0968	0	81.92	1	ortholog
ENSDARG00000016399	ENSG00000124784	riok1	RIOK1	1.07357	2.80155e-07	NA	NA	NA	NA	NA	NA	NA	NA	ortholog_one2one	68.662	70.6522	25	67.4	1	ortholog
ENSDARG00000016404	ENSG00000185920	ptch1	PTCH1	-1.12732	0.0142105	NA	NA	NA	NA	1.33051	0.0422268	NA	NA	ortholog_one2many	74.6372	73.2203	25	97.98	1	ortholog
ENSDARG00000016427	ENSG00000132436	fignl1	FIGNL1	2.06209	0.00137178	1.60518	9.77478e-05	0.941873	0.00356384	NA	NA	0.667654	0.0215744	ortholog_one2one	54.451	55.5219	50	87.49	1	ortholog
ENSDARG00000016429	ENSG00000006607	farp2	FARP2	NA	NA	0.805319	4.3427e-13	0.604474	3.04225e-14	NA	NA	NA	NA	ortholog_one2one	65.4649	66.092	75	78.09	1	ortholog
ENSDARG00000016457	ENSG00000213928	irf9	IRF9	2.60383	1.63005e-22	2.62863	5.94648e-25	0.68563	0.00025162	NA	NA	NA	NA	ortholog_many2many	33.0789	30.3738	0	0	0	ortholog
ENSDARG00000016460	ENSG00000172461	fut9a	FUT9	-0.841882	0.00224283	-0.711462	0.00102923	NA	NA	NA	NA	-2.88973	6.55458e-05	ortholog_one2many	58.4958	58.4958	25	100	1	ortholog
ENSDARG00000016464	ENSG00000143776	cdc42bpab	CDC42BPA	-1.36032	0.00145646	NA	NA	NA	NA	NA	NA	-1.45589	5.97007e-08	ortholog_one2many	73.822	73.951	0	78.26	1	ortholog
ENSDARG00000016470	ENSG00000164111	anxa5b	ANXA5	3.51905	2.09629e-11	3.20438	2.31503e-09	0.991143	0.026396	1.75519	0.000901107	2.6821	1.5196e-15	ortholog_one2many	60.9375	61.5142	0	45.26	0	ortholog
ENSDARG00000016474	ENSG00000054983	galcb	GALC	1.02837	3.30033e-06	NA	NA	NA	NA	NA	NA	NA	NA	ortholog_one2many	61.0219	62.9518	0	80.79	1	ortholog
ENSDARG00000016477	ENSG00000156976	eif4a2	EIF4A2	-0.87815	3.52818e-08	NA	NA	NA	NA	-1.00156	0.00048816	-1.18142	1.35118e-05	ortholog_one2one	96.5602	95.6204	0	99.61	1	ortholog
ENSDARG00000016480	ENSG00000104888	slc17a7a	SLC17A7	-1.94106	0.0374796	NA	NA	NA	NA	-3.52582	0.0116973	-5.20346	3.33283e-07	ortholog_one2many	79.2857	76.2887	0	86.71	1	ortholog
ENSDARG00000016484	ENSG00000130826	dkc1	DKC1	2.28896	2.08836e-08	0.96396	0.00486953	NA	NA	0.730509	0.000594353	0.877995	5.75189e-06	ortholog_one2one	74.1245	75.2964	0	77.36	1	ortholog
ENSDARG00000016490	ENSG00000090565	rab11fip3	RAB11FIP3	-1.55308	0.0338666	NA	NA	NA	NA	NA	NA	-0.862902	0.000605113	ortholog_one2one	48.6772	19.6267	0	32.11	0	ortholog
ENSDARG00000016494	ENSG00000132437	ddc	DDC	NA	NA	-1.24197	0.0345883	NA	NA	NA	NA	NA	NA	ortholog_one2one	69.7917	69.7917	50	93.02	1	ortholog
ENSDARG00000016505	ENSG00000077420	apbb1ip	APBB1IP	1.22327	0.0458699	3.89366	8.25452e-19	1.19336	0.00260992	NA	NA	NA	NA	ortholog_one2one	51.8018	53.4884	50	61.56	1	ortholog
ENSDARG00000016516	ENSG00000265241	rbm8a	RBM8A	0.928648	0.00330786	NA	NA	NA	NA	0.70004	3.10496e-05	NA	NA	ortholog_one2one	93.6782	93.6782	0	100	1	ortholog
ENSDARG00000016527	ENSG00000130589	helz2	HELZ2	NA	NA	4.96231	3.28092e-10	0.942537	0.0367043	NA	NA	1.45696	0.00277794	ortholog_one2many	37.5991	37.5	25	47.25	0	ortholog
ENSDARG00000016531	ENSG00000102271	klhl4	KLHL4	-1.16589	0.02049	NA	NA	NA	NA	NA	NA	NA	NA	ortholog_one2one	28.8301	63.3028	0	68.72	1	ortholog
ENSDARG00000016541	ENSG00000122122	sash3	SASH3	NA	NA	0.748579	0.00612063	NA	NA	NA	NA	1.79881	9.94655e-05	ortholog_one2one	47.6316	46.8912	75	47.51	1	ortholog
ENSDARG00000016570	ENSG00000113494	prlra	PRLR	NA	NA	NA	NA	-0.673161	0.0341863	NA	NA	NA	NA	ortholog_one2many	32.6367	33.4983	50	27.64	1	ortholog
ENSDARG00000016594	ENSG00000092036	haus4	HAUS4	NA	NA	3.24313	9.94991e-07	NA	NA	1.53352	1.30418e-08	1.14567	8.55225e-05	ortholog_one2many	32.7824	32.4251	0	0	0	ortholog
ENSDARG00000016607	ENSG00000121310	echdc2	ECHDC2	2.713	6.3683e-06	1.4349	0.000139002	NA	NA	NA	NA	NA	NA	ortholog_one2one	55.4795	50.7837	50	59.08	1	ortholog
ENSDARG00000016611	ENSG00000144306	scrn3	SCRN3	-0.831434	0.0334292	NA	NA	NA	NA	NA	NA	NA	NA	ortholog_one2one	62.2642	63.3094	100	82.89	1	ortholog
ENSDARG00000016649	ENSG00000211454	akr7a3	AKR7L	1.44919	4.69321e-08	NA	NA	NA	NA	NA	NA	NA	NA	ortholog_one2one	64.8485	60.6232	25	91.97	1	ortholog
ENSDARG00000016656	ENSG00000125871	mgme1	MGME1	NA	NA	0.816956	0.0103383	NA	NA	1.28287	2.59133e-05	1.48659	2.00191e-13	ortholog_one2one	48.5465	50	50	85.89	1	ortholog
ENSDARG00000016667	ENSG00000204681	gabbr1b	GABBR1	-2.61574	0.00252451	NA	NA	NA	NA	NA	NA	-2.92539	8.93862e-11	ortholog_one2many	71.488	69.1843	0	20.38	0	ortholog
ENSDARG00000016676	ENSG00000087258	gnao1a	GNAO1	-1.02762	0.0029435	NA	NA	NA	NA	-1.15867	0.00250666	-2.87537	2.28305e-10	ortholog_one2many	95.7627	95.7627	25	100	1	ortholog
ENSDARG00000016706	ENSG00000138363	atic	ATIC	1.55512	0.000139856	NA	NA	NA	NA	NA	NA	NA	NA	ortholog_one2one	77.1959	77.4576	25	97.74	1	ortholog
ENSDARG00000016725	ENSG00000130222	gadd45gb.1	GADD45G	NA	NA	1.27145	0.00608749	1.06032	0.00471374	2.27655	0.0027809	NA	NA	ortholog_one2many	66.0377	67.7419	0	88.31	1	ortholog
ENSDARG00000016730	ENSG00000064490	rfxank	RFXANK	2.4967	0.00085486	1.6484	0.00122733	NA	NA	1.2335	0.00101127	1.25195	5.48935e-08	ortholog_one2one	50.3846	64.532	100	72.39	1	ortholog
ENSDARG00000016733	ENSG00000135069	psat1	PSAT1	NA	NA	0.967477	3.85286e-12	NA	NA	1.13068	0.00788265	NA	NA	ortholog_one2one	74.5946	75	0	94.37	1	ortholog
ENSDARG00000016739	ENSG00000148948	lrrc4cb	LRRC4C	-0.698334	0.0065974	-0.607028	1.65995e-05	NA	NA	NA	NA	-1.3801	0.00341021	ortholog_one2many	71.875	72.9002	0	100	1	ortholog
ENSDARG00000016745	ENSG00000213699	slc35f6	SLC35F6	1.68185	7.54124e-05	0.790821	0.0124671	NA	NA	NA	NA	NA	NA	ortholog_one2one	73.5849	72.9947	0	97.65	1	ortholog
ENSDARG00000016754	ENSG00000171530	tbca	TBCA	1.00464	0.00911129	NA	NA	NA	NA	NA	NA	0.847907	0.00485396	ortholog_one2one	70.3704	70.3704	75	49.88	1	ortholog
ENSDARG00000016769	ENSG00000197860	sgtb	SGTB	-0.70415	0.00123587	NA	NA	NA	NA	-1.67736	0.000104923	-2.00652	1.21493e-19	ortholog_one2one	72.0395	68.4375	75	90.3	1	ortholog
ENSDARG00000016774	ENSG00000241839	plekho2	PLEKHO2	NA	NA	0.999872	1.80894e-06	NA	NA	NA	NA	NA	NA	ortholog_one2many	36.5306	26.2463	50	11.98	1	ortholog
ENSDARG00000016788	ENSG00000148516	zeb1a	ZEB1	-1.97014	0.00476997	NA	NA	NA	NA	1.72264	2.545e-05	0.850174	0.0183581	ortholog_one2many	43.1111	40.7563	25	42.21	0	ortholog
ENSDARG00000016835	ENSG00000110719	tcirg1a	TCIRG1	NA	NA	-0.595537	0.00091517	NA	NA	NA	NA	1.64426	0.000120321	ortholog_one2many	55.7831	56.2576	0	71.17	1	ortholog
ENSDARG00000016837	ENSG00000122694	glipr2l	GLIPR2	NA	NA	2.1033	6.07139e-05	NA	NA	2.0142	4.65696e-06	1.55622	2.35472e-05	ortholog_one2one	72.7273	72.7273	0	97.22	1	ortholog
ENSDARG00000016854	ENSG00000171532	neurod2	NEUROD2	-0.927255	0.0353407	NA	NA	NA	NA	-3.17528	0.0105377	-4.42137	1.09945e-06	ortholog_one2one	56.0209	58.9532	0	100	1	ortholog
ENSDARG00000016855	ENSG00000169976	sf3b5	SF3B5	1.27381	0.000594478	NA	NA	NA	NA	NA	NA	0.878199	0.00411392	ortholog_one2one	94.186	94.186	0	100	1	ortholog
ENSDARG00000016864	ENSG00000116120	farsb	FARSB	0.685533	0.0155905	NA	NA	NA	NA	NA	NA	NA	NA	ortholog_one2one	76.2309	76.1017	50	86.73	1	ortholog
ENSDARG00000016871	ENSG00000073584	smarce1	SMARCE1	0.618111	0.0162011	NA	NA	NA	NA	0.737901	0.000640665	0.804103	1.71601e-05	ortholog_one2one	76.6423	75	0	90.2	1	ortholog
ENSDARG00000016889	ENSG00000130811	eif3g	EIF3G	0.915261	0.00202617	NA	NA	NA	NA	0.705047	0.0177518	NA	NA	ortholog_one2one	80	87.372	0	91.65	1	ortholog
ENSDARG00000016939	ENSG00000160255	itgb2	ITGB2	1.88923	2.50761e-08	3.41307	3.26907e-44	1.10579	1.30352e-07	NA	NA	1.82089	0.000162458	ortholog_one2one	48.7646	48.8281	25	31.9	0	ortholog
ENSDARG00000016963	ENSG00000155380	slc16a1a	SLC16A1	NA	NA	NA	NA	-1.1855	0.0234815	NA	NA	0.815634	0.0038516	ortholog_one2many	68.6	74.4035	0	65.31	1	ortholog
ENSDARG00000016977	ENSG00000143376	snx27b	SNX27	-1.07358	0.0087664	NA	NA	NA	NA	NA	NA	-0.719916	0.000520647	ortholog_one2many	81.8854	77.8559	0	95.17	1	ortholog
ENSDARG00000016994	ENSG00000149136	ssrp1b	SSRP1	-0.748514	0.0346452	NA	NA	NA	NA	0.694458	0.000667374	0.630345	0.00131937	ortholog_one2many	69.3935	69.9858	0	96.63	1	ortholog
ENSDARG00000016999	ENSG00000131914	lin28a	LIN28A	4.48307	4.04021e-15	3.01639	0.00980977	NA	NA	NA	NA	NA	NA	ortholog_one2many	66.5072	68.8119	0	59.67	1	ortholog
ENSDARG00000017004	ENSG00000145555	myo10	MYO10	NA	NA	0.615026	0.000287557	0.689146	1.56295e-17	0.883724	0.00946836	NA	NA	ortholog_one2one	67.2983	66.9406	0	91.89	1	ortholog
ENSDARG00000017006	ENSG00000184014	dennd5a	DENND5A	-1.5399	0.00819784	NA	NA	NA	NA	0.912958	0.00347742	NA	NA	ortholog_one2one	83.1391	83.0745	50	99.78	1	ortholog
ENSDARG00000017049	ENSG00000239900	adsl	ADSL	0.958917	0.000420625	NA	NA	NA	NA	NA	NA	0.991754	0.00285007	ortholog_one2one	75.8264	76.1411	0	91.9	1	ortholog
ENSDARG00000017084	ENSG00000106245	bud31	BUD31	0.913405	0.00847054	NA	NA	NA	NA	NA	NA	1.18219	9.2728e-05	ortholog_one2one	93.0556	93.0556	25	100	1	ortholog
ENSDARG00000017086	ENSG00000198881	asb12a	ASB12	0.840714	0.00391216	NA	NA	NA	NA	NA	NA	NA	NA	ortholog_one2many	53.4591	55.7377	50	81.97	1	ortholog
ENSDARG00000017121	ENSG00000204103	mafba	MAFB	3.05006	1.41805e-15	2.38972	7.7998e-10	0.85062	0.000125355	NA	NA	1.65398	0.00352913	ortholog_one2one	69.3498	56.4232	0	96.49	1	ortholog
ENSDARG00000017162	ENSG00000084731	kif3ca	KIF3C	-1.78854	0.00634779	NA	NA	NA	NA	-1.84174	0.000406021	-2.90935	1.42661e-19	ortholog_one2many	67.7175	71.2202	50	81.48	1	ortholog
ENSDARG00000017180	ENSG00000141458	npc1	NPC1	0.729943	0.00544573	0.956839	0.00171831	NA	NA	NA	NA	-1.07265	0.000116657	ortholog_one2one	66.7449	66.7972	0	91.98	1	ortholog
ENSDARG00000017199	ENSG00000134759	elp2	ELP2	0.737215	0.00449619	NA	NA	NA	NA	NA	NA	NA	NA	ortholog_one2one	56.1743	55.5024	0	53.78	1	ortholog
ENSDARG00000017211	ENSG00000164050	plxnb1b	PLXNB1	-1.45311	0.00769385	NA	NA	NA	NA	NA	NA	NA	NA	ortholog_one2many	56.534	54.3694	0	71.89	1	ortholog
ENSDARG00000017220	ENSG00000264522	otud7b	OTUD7B	-1.66952	0.00015147	NA	NA	NA	NA	NA	NA	NA	NA	ortholog_one2one	64.6501	59.4329	50	80.69	1	ortholog
ENSDARG00000017235	ENSG00000163577	eif5a	EIF5A2	0.71712	0.00331093	NA	NA	NA	NA	-0.980181	0.028156	NA	NA	ortholog_one2many	77.7778	76.7742	50	100	1	ortholog
ENSDARG00000017255	ENSG00000099203	tmed1b	TMED1	1.19281	6.55735e-06	NA	NA	NA	NA	0.91624	0.00129176	1.03791	0.000473684	ortholog_one2many	56.3877	56.6372	25	73.4	1	ortholog
ENSDARG00000017266	ENSG00000146285	scml4	SCML4	-2.08541	0.00206567	NA	NA	NA	NA	NA	NA	NA	NA	ortholog_one2one	49.0338	42.9175	50	54.6	1	ortholog
ENSDARG00000017299	ENSG00000164687	fabp11a	FABP5	5.94872	4.89486e-22	4.65728	7.16331e-07	1.69164	2.68255e-10	NA	NA	2.35382	0.000803988	ortholog_many2many	46.6667	47.0149	50	0	1	ortholog
ENSDARG00000017311	ENSG00000121957	gpsm2	GPSM2	NA	NA	0.653054	0.0256206	NA	NA	1.24484	0.000556673	NA	NA	ortholog_one2one	65.7895	69.3374	25	77.15	1	ortholog
ENSDARG00000017312	ENSG00000164187	lmbrd2b	LMBRD2	-0.596047	0.015331	NA	NA	NA	NA	-1.15564	0.000764281	-1.67759	1.20636e-16	ortholog_one2many	75.2518	71.0598	75	84.87	1	ortholog
ENSDARG00000017316	ENSG00000166170	bag5	BAG5	-1.40465	9.3011e-05	NA	NA	NA	NA	NA	NA	NA	NA	ortholog_one2one	53.0201	46.3796	100	71.09	1	ortholog
ENSDARG00000017320	ENSG00000158769	f11r.1	F11R	NA	NA	2.94953	7.28667e-05	1.56669	0.00899428	NA	NA	1.55758	2.16195e-05	ortholog_one2many	38.1271	39.0411	25	0	0	ortholog
ENSDARG00000017321	ENSG00000128052	kdr	KDR	NA	NA	1.10218	0.0152608	NA	NA	NA	NA	1.11033	0.00523933	ortholog_one2one	48.8938	48.8578	100	43.58	1	ortholog
ENSDARG00000017329	ENSG00000100490	cdkl1	CDKL1	NA	NA	NA	NA	0.743606	0.0251644	NA	NA	-1.45742	3.50997e-08	ortholog_one2one	77.3109	78.8571	100	91.27	1	ortholog
ENSDARG00000017355	ENSG00000172426	rsph9	RSPH9	NA	NA	1.3377	0.000723138	NA	NA	-1.72684	0.00180093	NA	NA	ortholog_one2one	52.1739	51.9856	50	35.53	1	ortholog
ENSDARG00000017365	ENSG00000089057	slc23a2	SLC23A2	-1.50455	0.00780438	NA	NA	NA	NA	NA	NA	-1.16984	6.3367e-06	ortholog_one2one	78.7692	78.6482	25	86.46	1	ortholog
ENSDARG00000017398	ENSG00000137968	slc44a5a	SLC44A5	-1.58879	0.0232973	NA	NA	NA	NA	NA	NA	NA	NA	ortholog_one2many	58.4379	58.6014	50	59.88	1	ortholog
ENSDARG00000017400	ENSG00000266265	klf1	KLF14	2.11911	0.021293	NA	NA	NA	NA	NA	NA	NA	NA	ortholog_many2many	19.195	16.9863	0	0	0	ortholog
ENSDARG00000017425	ENSG00000226321	crocc2	CROCC2	NA	NA	1.27251	0.00155209	NA	NA	NA	NA	NA	NA	ortholog_many2many	32.7492	27.6672	25	14.44	0	ortholog
ENSDARG00000017445	ENSG00000084623	eif3i	EIF3I	0.762545	0.000474611	0.621802	5.29412e-05	NA	NA	NA	NA	1.02459	6.58592e-05	ortholog_one2one	69.6133	77.5385	0	94.69	1	ortholog
ENSDARG00000017500	ENSG00000134318	rock2a	ROCK2	-0.619801	0.00144722	NA	NA	NA	NA	-0.837764	0.00521584	-1.0569	2.45554e-05	ortholog_one2many	75.5043	76.2182	0	83.27	1	ortholog
ENSDARG00000017525	ENSG00000129315	ccnt1	CCNT1	-0.716442	0.0232688	NA	NA	NA	NA	NA	NA	NA	NA	ortholog_one2one	52.6171	56.6766	0	57.26	1	ortholog
ENSDARG00000017537	ENSG00000115592	prkag3a	PRKAG3	NA	NA	-0.646676	0.00148606	NA	NA	NA	NA	NA	NA	ortholog_one2many	39.4683	62.0579	0	25.37	0	ortholog
ENSDARG00000017590	ENSG00000114021	nit2	NIT2	0.865316	0.0332384	NA	NA	NA	NA	NA	NA	NA	NA	ortholog_one2one	72.1014	70.0704	0	81.7	1	ortholog
ENSDARG00000017602	ENSG00000138764	ccng2	CCNG2	-0.714086	0.0307955	NA	NA	NA	NA	NA	NA	NA	NA	ortholog_one2one	56.686	59.0909	50	77.49	1	ortholog
ENSDARG00000017605	ENSG00000124787	rpp40	RPP40	1.59809	0.00601495	NA	NA	NA	NA	NA	NA	0.757959	0.00490209	ortholog_one2one	48.7603	49.0305	25	79.88	1	ortholog
ENSDARG00000017606	ENSG00000204070	sys1	SYS1	0.697242	0.0157345	NA	NA	NA	NA	0.755562	0.00208405	0.885431	0.000332987	ortholog_one2many	73.7179	73.7179	0	98.52	1	ortholog
ENSDARG00000017617	ENSG00000088035	alg6	ALG6	1.20882	0.00061253	NA	NA	NA	NA	0.908623	0.0149025	1.62033	3.86169e-08	ortholog_one2one	60.7495	60.8696	100	49.32	1	ortholog
ENSDARG00000017658	ENSG00000173540	gmppb	GMPPB	1.4964	4.09028e-07	0.587636	0.0263985	NA	NA	NA	NA	NA	NA	ortholog_one2one	81.1111	81.1111	25	100	1	ortholog
ENSDARG00000017661	ENSG00000157764	braf	BRAF	-1.13071	0.00218523	NA	NA	NA	NA	-1.05435	5.75557e-05	-1.47602	3.8516e-12	ortholog_one2one	83.0235	82.0073	50	82.51	1	ortholog
ENSDARG00000017673	ENSG00000139910	nova2	NOVA1	-0.742691	0.000183941	NA	NA	NA	NA	0.879022	0.023296	NA	NA	ortholog_one2many	77.9093	76.4023	0	86.1	1	ortholog
ENSDARG00000017675	ENSG00000141076	utp4	UTP4	1.18437	0.000696033	0.62521	0.0497741	NA	NA	NA	NA	NA	NA	ortholog_one2one	53.4985	53.5766	0	61.35	1	ortholog
ENSDARG00000017676	ENSG00000087245	mmp2	MMP2	NA	NA	1.62266	5.9057e-06	0.967413	4.19229e-05	2.22311	0.000893016	3.82219	1.45326e-12	ortholog_one2one	71.5152	71.8417	100	94.4	1	ortholog
ENSDARG00000017687	ENSG00000163793	dnajc5gb	DNAJC5G	1.36215	0.00303129	1.06883	0.000558136	NA	NA	-3.42094	0.00427801	-4.64621	9.6327e-08	ortholog_many2many	44.9735	40.2844	0	0	0	ortholog
ENSDARG00000017728	ENSG00000215021	phb2b	PHB2	1.05591	3.95116e-05	NA	NA	NA	NA	0.847278	0.00544878	1.05552	0.000149192	ortholog_one2many	81.2709	80.198	0	81.91	1	ortholog
ENSDARG00000017744	ENSG00000136824	smc2	SMC2	NA	NA	2.84599	6.91295e-16	1.09514	0.000417368	0.876471	0.0296701	0.803832	0.0152225	ortholog_one2one	74.4361	74.3119	0	97.13	1	ortholog
ENSDARG00000017757	ENSG00000105851	pik3cg	PIK3CG	0.75208	0.0469315	0.844536	0.00117997	NA	NA	NA	NA	1.17165	0.0259317	ortholog_one2one	71.3249	71.5847	50	99.67	1	ortholog
ENSDARG00000017775	ENSG00000154518	atp5mc3a	ATP5MC3	0.942615	0.00336799	NA	NA	NA	NA	NA	NA	NA	NA	ortholog_one2one	76.0563	77.6978	100	84.73	1	ortholog
ENSDARG00000017781	ENSG00000072506	hsd17b10	HSD17B10	0.626143	0.00932672	NA	NA	NA	NA	1.3128	2.4597e-05	1.54691	5.7561e-12	ortholog_one2one	72.4138	72.6923	0	96.82	1	ortholog
ENSDARG00000017794	ENSG00000170786	sdr16c5b	SDR16C5	1.4584	0.0213413	1.33397	5.1198e-08	0.659584	0.00207327	-2.91859	0.0371056	-4.25537	4.40875e-05	ortholog_one2many	58.8997	59.4771	75	69.8	1	ortholog
ENSDARG00000017841	ENSG00000111530	cand1	CAND1	-0.593226	0.00147475	NA	NA	NA	NA	NA	NA	NA	NA	ortholog_one2one	94.2276	94.2276	50	100	1	ortholog
ENSDARG00000017853	ENSG00000138078	prepl	PREPL	0.959349	0.0384913	NA	NA	NA	NA	-1.87378	2.0364e-05	-2.42023	6.10763e-33	ortholog_one2one	40.4389	37.2832	100	27.27	1	ortholog
ENSDARG00000017905	ENSG00000164305	casp3a	CASP3	NA	NA	0.657703	3.20323e-05	0.895295	7.04961e-14	NA	NA	1.53556	2.51012e-07	ortholog_one2many	55.5957	54.6099	0	63.38	1	ortholog
ENSDARG00000017910	ENSG00000148459	pdss1	PDSS1	1.39364	0.000175368	NA	NA	NA	NA	1.13982	0.000208197	0.961013	0.00112693	ortholog_one2one	61.2048	61.8005	25	78.44	1	ortholog
ENSDARG00000017929	ENSG00000140396	ncoa2	NCOA2	-0.649319	0.0233708	NA	NA	NA	NA	NA	NA	-0.92169	0.000159004	ortholog_one2one	59.0164	57.4086	75	90.86	1	ortholog
ENSDARG00000017931	ENSG00000165359	ints6l	INTS6L	-1.0821	0.000156213	NA	NA	NA	NA	NA	NA	NA	NA	ortholog_one2one	70.3786	70.852	50	60.72	1	ortholog
ENSDARG00000017960	ENSG00000156398	sfxn2	SFXN2	1.86418	0.000116629	NA	NA	NA	NA	0.843012	0.0470838	NA	NA	ortholog_one2one	71.4286	71.6511	50	93.76	1	ortholog
ENSDARG00000017982	ENSG00000146233	cyp39a1	CYP39A1	NA	NA	NA	NA	1.30828	1.53401e-09	NA	NA	NA	NA	ortholog_one2one	49.4669	50	0	49.65	0	ortholog
ENSDARG00000017985	ENSG00000151470	C1H4orf33	C4orf33	1.25883	0.0272493	NA	NA	NA	NA	NA	NA	NA	NA	ortholog_one2one	60.804	61.4213	50	77.66	1	ortholog
ENSDARG00000017988	ENSG00000111817	dse	DSE	1.12513	0.0143911	1.16806	0.000214415	NA	NA	NA	NA	1.63337	0.000389705	ortholog_one2many	65.0313	65.648	50	100	1	ortholog
ENSDARG00000018000	ENSG00000153560	ubp1	UBP1	-1.55774	0.0135378	NA	NA	NA	NA	NA	NA	NA	NA	ortholog_one2one	70.3704	71.4286	25	60.59	1	ortholog
ENSDARG00000018002	ENSG00000167969	eci1	ECI1	1.23048	0.00826017	0.602069	0.00438771	NA	NA	1.06182	0.00234892	1.04649	0.00122821	ortholog_one2one	54.3046	49.848	25	77.93	1	ortholog
ENSDARG00000018008	ENSG00000138400	mdh1b	MDH1B	NA	NA	2.094	0.000200503	NA	NA	NA	NA	NA	NA	ortholog_one2one	37.0656	42.2907	25	43.35	0	ortholog
ENSDARG00000018010	ENSG00000170275	crtap	CRTAP	1.40663	0.0136649	NA	NA	NA	NA	0.939355	0.00157262	0.93936	8.41288e-05	ortholog_one2one	65.3367	66.1616	50	89.94	1	ortholog
ENSDARG00000018025	ENSG00000121068	tbx2a	TBX2	3.48864	0.0153301	NA	NA	NA	NA	1.77032	0.0029395	2.52421	2.57674e-08	ortholog_one2many	63.4831	65.8892	25	86.61	1	ortholog
ENSDARG00000018032	ENSG00000196876	scn8ab	SCN8A	-1.19647	0.000782303	NA	NA	NA	NA	-2.39696	0.000956334	-3.81702	7.18061e-21	ortholog_one2many	83.0303	83.9632	0	92.7	1	ortholog
ENSDARG00000018040	ENSG00000170903	msantd4	MSANTD4	-2.0582	0.0024935	NA	NA	NA	NA	NA	NA	NA	NA	ortholog_one2one	53.3333	44.5521	50	69.81	1	ortholog
ENSDARG00000018060	ENSG00000105647	pik3r2	PIK3R2	-0.671051	0.00184885	NA	NA	NA	NA	NA	NA	NA	NA	ortholog_one2many	61.5385	61.8785	25	10.59	0	ortholog
ENSDARG00000018061	ENSG00000140398	neil1	NEIL1	NA	NA	0.785984	7.52833e-05	0.58825	0.00401341	NA	NA	NA	NA	ortholog_one2one	47.9487	42.6941	25	58.63	1	ortholog
ENSDARG00000018073	ENSG00000175110	mrps22	MRPS22	0.588701	0.0175429	NA	NA	NA	NA	NA	NA	NA	NA	ortholog_one2one	51.9444	55	50	49.16	1	ortholog
ENSDARG00000018107	ENSG00000105514	rab3da	RAB3D	-1.63302	0.00306795	NA	NA	NA	NA	-1.3694	0.0176966	NA	NA	ortholog_one2many	76.7123	75.3363	0	48.94	0	ortholog
ENSDARG00000018109	ENSG00000197063	mafga	MAFG	-3.42533	3.11295e-06	NA	NA	NA	NA	-1.03555	8.14798e-05	-1.37753	4.73287e-08	ortholog_one2many	88.8889	88.8889	0	92.44	1	ortholog
ENSDARG00000018121	ENSG00000151849	cenpj	CENPJ	NA	NA	1.2596	0.000444126	NA	NA	NA	NA	NA	NA	ortholog_one2one	29.6712	35.3203	0	32.3	0	ortholog
ENSDARG00000018124	ENSG00000108344	psmd3	PSMD3	0.746789	0.0131086	NA	NA	NA	NA	NA	NA	NA	NA	ortholog_one2one	80.8989	85.8847	0	96.47	1	ortholog
ENSDARG00000018149	ENSG00000139209	slc38a4	SLC38A4	-1.94773	0.00139714	NA	NA	NA	NA	NA	NA	NA	NA	ortholog_one2one	65.4479	66.5427	50	40.91	1	ortholog
ENSDARG00000018165	ENSG00000024526	depdc1a	DEPDC1	NA	NA	2.13172	4.07921e-07	0.893303	0.035881	NA	NA	3.80504	9.11711e-16	ortholog_one2one	48.0888	48.75	0	64.61	1	ortholog
ENSDARG00000018178	ENSG00000169299	pgm2	PGM2	0.964569	0.000738869	NA	NA	NA	NA	NA	NA	1.55173	5.93484e-16	ortholog_one2one	72.7124	72.8314	50	95.68	1	ortholog
ENSDARG00000018179	ENSG00000139567	acvrl1	ACVRL1	1.5387	0.0100385	1.08466	0.0132367	NA	NA	NA	NA	1.15693	0.00444426	ortholog_many2many	56.2624	56.7134	25	56.75	1	ortholog
ENSDARG00000018228	ENSG00000147246	htr2cl1	HTR2C	NA	NA	NA	NA	-0.659626	1.57896e-05	-3.06299	0.00423418	-5.57737	2.09024e-08	ortholog_one2many	53.0568	46.9112	0	46.52	0	ortholog
ENSDARG00000018257	ENSG00000084676	ncoa1	NCOA1	-1.51678	0.018651	NA	NA	NA	NA	NA	NA	-0.866947	0.000764166	ortholog_one2one	44.7606	47.8132	25	56.65	1	ortholog
ENSDARG00000018266	ENSG00000100714	mthfd1a	MTHFD1	2.15679	0.00680417	0.791636	0.00011761	0.96476	0.0110029	NA	NA	NA	NA	ortholog_one2many	55.8289	56.8009	50	19.53	1	ortholog
ENSDARG00000018283	ENSG00000051523	cyba	CYBA	3.18766	8.40293e-12	2.66269	3.16582e-11	0.730351	0.0147035	NA	NA	2.14957	1.23525e-06	ortholog_one2one	53.3333	56.2162	25	38.25	0	ortholog
ENSDARG00000018303	ENSG00000175832	etv4	ETV4	1.39723	0.00563928	1.45472	1.44091e-12	NA	NA	2.87493	0.0316845	3.57384	3.66918e-08	ortholog_one2one	61.157	59.919	75	68.58	1	ortholog
ENSDARG00000018334	ENSG00000136942	rpl35	RPL35	1.29165	0.000850394	0.779839	0.00150331	NA	NA	1.00832	0.0155729	1.59684	8.58492e-05	ortholog_one2one	92.6829	92.6829	0	99.2	1	ortholog
ENSDARG00000018382	ENSG00000027075	prkcha	PRKCH	NA	NA	1.42656	0.00783229	NA	NA	NA	NA	NA	NA	ortholog_many2many	66.0322	63.3427	50	65.42	1	ortholog
ENSDARG00000018432	ENSG00000003056	m6pr	M6PR	0.74893	0.0182498	NA	NA	NA	NA	NA	NA	NA	NA	ortholog_one2one	44.7653	46.7925	0	53.52	1	ortholog
ENSDARG00000018491	ENSG00000155660	pdia4	PDIA4	1.75094	4.81848e-16	1.17707	5.1214e-05	NA	NA	1.47375	0.000941567	2.45315	6.09476e-15	ortholog_one2one	72.2481	72.5857	50	92.89	1	ortholog
ENSDARG00000018516	ENSG00000112079	stk38b	STK38	NA	NA	1.04894	0.00878558	NA	NA	1.22745	8.93436e-05	1.64661	2.53829e-11	ortholog_one2many	89.2473	88.6752	25	67.12	1	ortholog
ENSDARG00000018524	ENSG00000167470	midn	MIDN	-0.843269	0.0208261	-1.35873	1.34121e-17	-0.989879	2.17764e-52	1.09166	0.00370453	1.00662	0.000898793	ortholog_one2one	62.3932	57.3674	50	78.19	1	ortholog
ENSDARG00000018529	ENSG00000107798	lipf	LIPA	1.19265	0.00405072	0.775429	0.0228354	NA	NA	NA	NA	NA	NA	ortholog_one2one	58.396	58.8384	0	75.27	1	ortholog
ENSDARG00000018553	ENSG00000115267	ifih1	IFIH1	NA	NA	3.23892	3.20828e-21	1.1731	9.24468e-05	NA	NA	1.62535	0.000538587	ortholog_one2one	46.9268	48.2447	50	49.35	1	ortholog
ENSDARG00000018562	ENSG00000105669	cope	COPE	0.870314	0.00070612	NA	NA	NA	NA	NA	NA	0.650898	0.0194424	ortholog_one2one	74.3506	76.3333	0	91.44	1	ortholog
ENSDARG00000018566	ENSG00000128591	flnca	FLNC	2.61252	0.0408382	1.0389	0.000558136	NA	NA	NA	NA	NA	NA	ortholog_one2many	78.422	78.5951	0	95.2	1	ortholog
ENSDARG00000018574	ENSG00000143368	sf3b4	SF3B4	0.696052	0.00552815	NA	NA	NA	NA	0.78093	0.000272148	0.829436	4.28999e-07	ortholog_one2one	76.6509	81.25	0	72.83	1	ortholog
ENSDARG00000018616	ENSG00000144891	agtr1a	AGTR1	NA	NA	2.66296	1.45256e-06	2.04872	9.07163e-05	NA	NA	2.22737	0.0121956	ortholog_one2many	46.7967	46.9274	50	90.73	1	ortholog
ENSDARG00000018619	ENSG00000090661	cers4b	CERS4	-1.92629	0.000641409	-0.585576	0.000720521	NA	NA	NA	NA	NA	NA	ortholog_one2many	43.401	45	0	0	0	ortholog
ENSDARG00000018623	ENSG00000085999	rad54l	RAD54L	NA	NA	1.72731	0.000368941	NA	NA	NA	NA	2.1517	5.56381e-07	ortholog_one2one	79.1165	80.0813	25	90.65	1	ortholog
ENSDARG00000018637	ENSG00000132432	sec61g	SEC61G	1.44857	0.0188255	0.76998	0.000372678	NA	NA	NA	NA	4.66939	6.48492e-07	ortholog_one2one	100	100	0	95.38	1	ortholog
ENSDARG00000018643	ENSG00000167244	igf2a	IGF2	2.50311	2.14439e-13	0.856201	3.35859e-08	0.988216	0.000473191	NA	NA	NA	NA	ortholog_one2many	43.8889	40.1015	0	36.82	0	ortholog
ENSDARG00000018688	ENSG00000111145	elk3	ELK3	2.15242	1.00543e-07	1.71457	2.36182e-06	NA	NA	NA	NA	1.94498	3.81686e-09	ortholog_one2one	63.6364	63.4804	25	80.9	1	ortholog
ENSDARG00000018716	ENSG00000102780	dgkh	DGKH	-1.79058	5.00146e-06	-0.825182	0.0010875	-0.728179	1.04052e-12	-1.19511	0.00820447	-1.76192	3.8673e-07	ortholog_one2one	75.082	74.8978	100	80.56	1	ortholog
ENSDARG00000018721	ENSG00000168743	npnta	NPNT	-1.44926	0.016501	-0.629676	5.58486e-06	NA	NA	NA	NA	2.28014	0.00249131	ortholog_one2many	57.3451	53.5537	50	61.25	1	ortholog
ENSDARG00000018726	ENSG00000176463	slco3a1	SLCO3A1	-1.85717	0.0120062	NA	NA	NA	NA	NA	NA	-1.72869	0.00176077	ortholog_one2many	75.7747	76.7475	50	97.5	1	ortholog
ENSDARG00000018738	ENSG00000086827	zw10	ZW10	0.862327	0.0027383	NA	NA	NA	NA	NA	NA	NA	NA	ortholog_one2one	59.4352	60.0519	50	97.76	1	ortholog
ENSDARG00000018743	ENSG00000198794	scamp5a	SCAMP5	-2.36364	0.00990641	NA	NA	NA	NA	-1.57152	0.000641785	-2.71578	6.60356e-17	ortholog_one2many	78.2979	80	0	64.43	1	ortholog
ENSDARG00000018787	ENSG00000169242	efna1b	EFNA1	NA	NA	-1.45114	7.05713e-07	-1.02147	2.86562e-13	NA	NA	NA	NA	ortholog_one2many	47.3171	42.3581	25	54.53	1	ortholog
ENSDARG00000018788	ENSG00000140557	st8sia2	ST8SIA2	-2.35345	0.000105765	-0.664019	0.0117307	NA	NA	NA	NA	NA	NA	ortholog_one2one	62.6667	61.6798	75	71.13	1	ortholog
ENSDARG00000018817	ENSG00000176697	bdnf	BDNF	NA	NA	-0.837712	0.000746544	-0.717904	1.12742e-06	-3.39893	0.0021507	-3.11911	0.000164163	ortholog_one2one	77.3279	70.7407	50	100	1	ortholog
ENSDARG00000018820	ENSG00000128591	flncb	FLNC	0.947171	0.000394674	NA	NA	NA	NA	NA	NA	NA	NA	ortholog_one2many	83.6697	82.2214	0	94.54	1	ortholog
ENSDARG00000018846	ENSG00000062282	dgat2	DGAT2	NA	NA	NA	NA	3.4646	0.00507623	NA	NA	-1.43758	0.0180424	ortholog_one2one	64.433	68.306	100	91.96	1	ortholog
ENSDARG00000018856	ENSG00000133083	dclk1a	DCLK1	NA	NA	-0.916382	1.30284e-10	-0.9133	6.15713e-15	-1.21457	0.0401856	-1.47463	0.000842069	ortholog_one2many	77.7027	74.6753	50	69.72	1	ortholog
ENSDARG00000018891	ENSG00000104889	rnaseh2a	RNASEH2A	0.822528	0.0384014	0.698881	0.0136812	NA	NA	1.53222	0.0011298	2.35396	1.30307e-11	ortholog_one2one	60.2007	58.6319	25	83.2	1	ortholog
ENSDARG00000018896	ENSG00000125966	mmp24	MMP24	-1.95155	0.0213485	NA	NA	NA	NA	NA	NA	NA	NA	ortholog_one2one	73.0233	77.7228	0	89.32	1	ortholog
ENSDARG00000018903	ENSG00000106305	aimp2	AIMP2	0.941131	0.00610127	NA	NA	NA	NA	0.855552	0.000298154	0.992202	3.20854e-06	ortholog_one2one	54.375	54.2056	0	73.87	1	ortholog
ENSDARG00000018907	ENSG00000083168	kat6a	KAT6A	-0.957363	0.0256201	NA	NA	NA	NA	0.764101	0.0190391	NA	NA	ortholog_one2one	58.1337	51.87	0	69.66	1	ortholog
ENSDARG00000018923	ENSG00000086570	fat2	FAT2	NA	NA	-0.901186	0.0210713	NA	NA	NA	NA	-1.29958	0.0364533	ortholog_one2one	46.6314	46.7066	25	77.73	1	ortholog
ENSDARG00000018971	ENSG00000176597	b3gnt5a	B3GNT5	3.062	0.00306135	NA	NA	NA	NA	NA	NA	1.69337	5.00453e-06	ortholog_one2many	55.291	55.1451	0	99.87	1	ortholog
ENSDARG00000019008	ENSG00000023318	erp44	ERP44	0.748137	0.00171514	NA	NA	NA	NA	NA	NA	0.756363	0.00468055	ortholog_one2one	76.3547	75.9804	100	95.13	1	ortholog
ENSDARG00000019062	ENSG00000162704	arpc5b	ARPC5	0.782317	0.0289049	0.740627	0.00604245	NA	NA	NA	NA	0.860517	0.00654246	ortholog_one2many	82.1192	82.6667	0	100	1	ortholog
ENSDARG00000019063	ENSG00000083857	fat1b	FAT1	-1.4322	0.00661519	-0.629858	0.0177295	NA	NA	NA	NA	NA	NA	ortholog_one2many	53.4874	54.497	50	71.92	1	ortholog
ENSDARG00000019081	ENSG00000104808	DHDH	DHDH	NA	NA	1.05863	0.0163682	NA	NA	-2.66518	0.000216071	-2.17896	4.02711e-06	ortholog_one2many	50.2994	50.1493	0	65.15	1	ortholog
ENSDARG00000019098	ENSG00000085117	cd82a	CD82	0.892103	0.0087959	0.967062	2.1787e-05	NA	NA	1.28344	0.00177946	NA	NA	ortholog_one2many	47.9401	50	50	41.34	1	ortholog
ENSDARG00000019128	ENSG00000167460	tpm4b	TPM4	NA	NA	1.05017	0.0425551	NA	NA	NA	NA	1.58526	2.8939e-06	ortholog_one2one	77.0161	77.0161	50	11.2	1	ortholog
ENSDARG00000019130	ENSG00000145632	plk2b	PLK2	NA	NA	-1.40426	5.06633e-13	-1.43271	4.07058e-17	-2.70227	0.000212075	-2.2571	2.30269e-06	ortholog_one2many	66.7153	69.5586	75	89.73	1	ortholog
ENSDARG00000019135	ENSG00000132623	ankef1a	ANKEF1	NA	NA	1.16702	0.000811893	NA	NA	NA	NA	NA	NA	ortholog_one2many	49.7423	49.5507	25	84.77	1	ortholog
ENSDARG00000019137	ENSG00000067167	tram1	TRAM1	2.29542	6.69696e-12	1.37281	6.81187e-07	NA	NA	0.915586	0.00432019	1.60026	1.11776e-08	ortholog_one2many	71.9251	72.8997	100	94.78	1	ortholog
ENSDARG00000019160	ENSG00000175137	sh3bp5la	SH3BP5L	-0.780438	0.0053861	-0.903945	1.15866e-18	-0.705829	6.39803e-07	NA	NA	NA	NA	ortholog_one2many	53.1807	49.1765	0	54.41	1	ortholog
ENSDARG00000019181	ENSG00000168028	rpsa	RPSA	1.6915	1.46607e-11	1.31155	5.93211e-08	NA	NA	1.37398	0.00109999	2.14653	3.5197e-09	ortholog_one2one	92.2034	88.3117	25	100	1	ortholog
ENSDARG00000019207	ENSG00000148288	abo	GBGT1	NA	NA	1.83334	0.0404392	NA	NA	NA	NA	1.14735	0.00931304	ortholog_one2many	42.3631	48.3553	0	78.15	1	ortholog
ENSDARG00000019208	ENSG00000130559	camsap1a	CAMSAP1	-1.11939	0.0118196	NA	NA	NA	NA	-0.948915	0.000297382	-1.59636	1.70187e-08	ortholog_one2many	48.4394	53.2236	0	72.31	1	ortholog
ENSDARG00000019222	ENSG00000143314	mrpl24	MRPL24	0.955499	0.0161169	NA	NA	NA	NA	0.70432	0.0233729	NA	NA	ortholog_one2one	64.3519	64.3519	0	100	1	ortholog
ENSDARG00000019231	ENSG00000197694	sptan1	SPTAN1	-0.875335	0.0107669	NA	NA	NA	NA	-0.796885	0.000526496	-1.74227	6.24061e-10	ortholog_one2one	89.8668	89.7581	50	99.61	1	ortholog
ENSDARG00000019233	ENSG00000123213	nln	NLN	NA	NA	-0.893459	0.00317865	-1.95089	7.23815e-21	NA	NA	NA	NA	ortholog_one2one	56.8182	56.338	75	26.25	1	ortholog
ENSDARG00000019260	ENSG00000073737	dhrs9	DHRS9	NA	NA	0.608984	0.0104269	NA	NA	NA	NA	NA	NA	ortholog_one2one	46.0815	46.0815	100	17.14	1	ortholog
ENSDARG00000019304	ENSG00000087495	phactr3b	PHACTR3	NA	NA	-0.937959	1.98052e-07	-0.601116	5.24696e-08	NA	NA	-2.72735	0.000162557	ortholog_one2many	52.7728	56.1905	25	59.99	1	ortholog
ENSDARG00000019307	ENSG00000138166	dusp5	DUSP5	NA	NA	-1.24491	1.77778e-07	-1.40467	9.29267e-27	NA	NA	NA	NA	ortholog_one2one	51.8229	54.0761	50	71.59	1	ortholog
ENSDARG00000019332	ENSG00000065518	ndufb4	NDUFB4	0.939608	0.0015115	NA	NA	NA	NA	NA	NA	NA	NA	ortholog_one2one	46.5116	46.1538	25	84.02	1	ortholog
ENSDARG00000019335	ENSG00000144485	hes6	HES6	NA	NA	-0.650201	0.00501367	NA	NA	4.14051	1.34955e-12	1.90099	0.0016377	ortholog_one2many	49.5536	49.115	0	74.04	1	ortholog
ENSDARG00000019341	ENSG00000063660	gpc1a	GPC1	-1.74938	0.0403008	NA	NA	NA	NA	NA	NA	1.19798	0.0132959	ortholog_one2many	50.3584	49.9112	25	59.95	1	ortholog
ENSDARG00000019353	ENSG00000113140	sparc	SPARC	NA	NA	0.776509	0.000264135	NA	NA	3.64287	5.36345e-09	3.07328	1.6665e-22	ortholog_one2one	76.5677	79.7251	50	94.2	1	ortholog
ENSDARG00000019355	ENSG00000162377	coa7	COA7	0.741371	0.0171324	NA	NA	NA	NA	-0.891557	0.00252927	-0.790999	1.0703e-05	ortholog_one2one	58.8745	59.3886	50	100	1	ortholog
ENSDARG00000019367	ENSG00000119699	tgfb3	TGFB3	1.40482	0.0171207	1.02706	0.0277205	NA	NA	NA	NA	NA	NA	ortholog_one2one	73.0583	73.4146	75	99.76	1	ortholog
ENSDARG00000019383	ENSG00000198752	cdc42bpb	CDC42BPB	-0.660807	0.0190503	NA	NA	NA	NA	-0.713302	0.00708788	-1.66394	6.17381e-09	ortholog_one2one	73.4074	73.5363	50	86.95	1	ortholog
ENSDARG00000019392	ENSG00000126561	stat5a	STAT5A	-1.72361	0.0424225	NA	NA	NA	NA	NA	NA	0.741784	0.0263638	ortholog_many2many	77.7078	78.5987	0	87.45	1	ortholog
ENSDARG00000019396	ENSG00000111404	rergla	RERGL	NA	NA	-1.39884	9.17806e-05	-1.21975	1.50096e-07	NA	NA	NA	NA	ortholog_one2one	56.3725	56.0976	0	74.09	1	ortholog
ENSDARG00000019398	ENSG00000100902	psma6a	PSMA6	1.45135	7.88439e-08	0.673306	0.00766848	NA	NA	NA	NA	NA	NA	ortholog_one2many	90.2439	90.2439	100	37.13	1	ortholog
ENSDARG00000019404	ENSG00000099624	atp5f1d	ATP5F1D	1.1501	0.00218523	NA	NA	NA	NA	NA	NA	NA	NA	ortholog_one2one	66.0714	69.8113	25	96.68	1	ortholog
ENSDARG00000019417	ENSG00000130222	gadd45ga	GADD45G	1.70879	7.69294e-07	NA	NA	NA	NA	2.27655	0.0027809	NA	NA	ortholog_one2many	66.6667	66.6667	0	90.11	1	ortholog
ENSDARG00000019426	ENSG00000038382	trioa	TRIO	-1.53447	0.0147283	NA	NA	NA	NA	NA	NA	NA	NA	ortholog_one2one	81.4336	81.6974	0	96.94	1	ortholog
ENSDARG00000019444	ENSG00000180879	ssr4	SSR4	1.60343	0.000112434	0.819557	0.00129656	NA	NA	1.18502	0.000392723	1.62304	2.19856e-07	ortholog_one2one	67.6301	69.6429	0	88.67	1	ortholog
ENSDARG00000019484	ENSG00000153786	zdhhc7	ZDHHC7	-1.20184	0.000521774	NA	NA	NA	NA	NA	NA	NA	NA	ortholog_one2one	76.2987	78.5953	0	100	1	ortholog
ENSDARG00000019487	ENSG00000139921	tmx1	TMX1	1.22706	9.03581e-07	NA	NA	NA	NA	1.42705	1.64368e-06	1.57953	5.66232e-10	ortholog_one2one	50.7143	50	75	58.88	1	ortholog
ENSDARG00000019501	ENSG00000197136	pcnx3	PCNX3	-1.07839	0.0369173	NA	NA	NA	NA	NA	NA	NA	NA	ortholog_one2one	64.8476	58.1313	0	79.01	1	ortholog
ENSDARG00000019507	ENSG00000100297	mcm5	MCM5	1.99642	4.42858e-05	2.7941	2.14616e-15	0.819699	0.00329167	1.7852	8.73125e-06	1.8577	1.08621e-09	ortholog_one2one	80.654	80.4348	25	99.91	1	ortholog
ENSDARG00000019521	ENSG00000121053	mpx	EPX	3.15442	0.0163814	NA	NA	NA	NA	NA	NA	-1.46794	0.000379619	ortholog_one2one	48.8112	39.0817	0	56.98	1	ortholog
ENSDARG00000019525	ENSG00000154114	tbcelb	TBCEL	-1.68369	0.0252246	NA	NA	NA	NA	NA	NA	NA	NA	ortholog_many2many	63.9151	63.3178	25	97.82	1	ortholog
ENSDARG00000019529	ENSG00000143799	parp1	PARP1	-0.734945	0.00145067	NA	NA	NA	NA	NA	NA	NA	NA	ortholog_one2one	70.217	70.2863	50	92.78	1	ortholog
ENSDARG00000019532	ENSG00000134824	fads2	FADS2	NA	NA	-0.951012	1.88796e-05	-1.1814	4.44741e-26	1.68455	9.18904e-05	NA	NA	ortholog_one2many	65.3153	65.3153	0	95.43	1	ortholog
ENSDARG00000019579	ENSG00000169744	ldb2a	LDB2	NA	NA	-0.626693	0.00159185	NA	NA	-2.11733	0.0012512	-2.39189	2.70097e-07	ortholog_one2many	87.1314	74.0319	75	92.03	1	ortholog
ENSDARG00000019588	ENSG00000104964	chico	TLE5	-2.31641	0.00481298	NA	NA	NA	NA	-1.16313	0.00128978	-0.777595	0.00918362	ortholog_one2many	82.2335	81.407	0	84.85	1	ortholog
ENSDARG00000019636	ENSG00000174851	yif1a	YIF1A	0.686168	0.0151883	NA	NA	NA	NA	1.26576	1.45781e-05	1.12158	3.1972e-06	ortholog_one2one	65.529	62.5407	0	88.83	1	ortholog
ENSDARG00000019658	ENSG00000028277	pou2f2a	POU2F2	-1.39943	0.0124956	NA	NA	NA	NA	NA	NA	NA	NA	ortholog_one2many	55.1195	46.4748	25	44.28	0	ortholog
ENSDARG00000019709	ENSG00000116574	rhoua	RHOU	-1.66444	0.0052787	NA	NA	NA	NA	NA	NA	-1.11523	0.00489634	ortholog_one2many	72.4806	73.622	50	100	1	ortholog
ENSDARG00000019732	ENSG00000109919	mtch2	MTCH2	0.630788	0.014504	NA	NA	NA	NA	NA	NA	NA	NA	ortholog_one2one	68.9769	69.6667	0	77.51	1	ortholog
ENSDARG00000019774	ENSG00000174306	zhx3	ZHX3	-1.06791	0.00104141	NA	NA	NA	NA	NA	NA	NA	NA	ortholog_one2many	41.6318	36.7498	50	71.2	1	ortholog
ENSDARG00000019778	ENSG00000137154	rps6	RPS6	1.51514	5.54431e-09	1.14544	1.97687e-05	NA	NA	1.47437	0.0003472	1.33063	0.000493355	ortholog_one2one	95.5823	95.5823	0	99.25	1	ortholog
ENSDARG00000019791	ENSG00000185238	prmt3	PRMT3	1.69929	4.91555e-09	NA	NA	NA	NA	1.12953	0.00032984	0.960343	0.000878935	ortholog_one2one	57.6271	59.7656	75	54.75	1	ortholog
ENSDARG00000019815	ENSG00000115414	fn1a	FN1	3.02307	1.11875e-10	NA	NA	1.00256	0.000274819	NA	NA	3.58565	2.23233e-10	ortholog_one2many	58.2156	58.1452	0	81.24	1	ortholog
ENSDARG00000019838	ENSG00000109814	ugdh	UGDH	0.945032	0.00940016	1.04722	9.62031e-05	NA	NA	NA	NA	0.971198	0.0021569	ortholog_one2one	83.4008	83.57	100	93.11	1	ortholog
ENSDARG00000019845	ENSG00000107438	pdlim1	PDLIM1	3.02868	7.42052e-06	1.79406	0.000115382	NA	NA	NA	NA	2.21681	2.11088e-06	ortholog_one2one	70.5167	72.0497	0	92.7	1	ortholog
ENSDARG00000019861	ENSG00000127951	fgl2a	FGL2	NA	NA	NA	NA	-1.6452	4.55989e-08	NA	NA	1.5456	0.00171528	ortholog_one2many	54.6697	53.2151	25	89.06	1	ortholog
ENSDARG00000019881	ENSG00000172270	bsg	BSG	0.660571	0.0151412	NA	NA	NA	NA	NA	NA	NA	NA	ortholog_one2one	33.7662	32.1782	50	55.21	1	ortholog
ENSDARG00000019907	ENSG00000136982	dscc1	DSCC1	2.58461	0.0211164	2.24845	9.97639e-07	NA	NA	1.3088	0.000488444	1.8691	5.02481e-12	ortholog_one2one	66.6667	67.0077	50	86.46	1	ortholog
ENSDARG00000019930	ENSG00000162367	tal1	TAL1	1.23193	0.0116432	NA	NA	NA	NA	NA	NA	NA	NA	ortholog_one2one	48.9426	50	25	88.43	1	ortholog
ENSDARG00000019949	ENSG00000149257	serpinh1b	SERPINH1	NA	NA	2.41255	0.00687638	NA	NA	1.51245	0.047713	3.73776	1.33794e-17	ortholog_one2many	64.8325	66.9136	25	98.6	1	ortholog
ENSDARG00000019990	ENSG00000157782	cabp1a	CABP1	-1.59798	0.0003628	-0.796602	0.00569118	-0.737448	9.84155e-06	-2.43764	0.018227	-4.37947	5.38818e-10	ortholog_one2many	36.7568	73.1183	50	57.45	1	ortholog
ENSDARG00000019998	ENSG00000162695	slc30a7	SLC30A7	0.963987	0.0033439	NA	NA	NA	NA	NA	NA	1.14131	8.77884e-08	ortholog_one2one	77.9255	75.7106	100	96.95	1	ortholog
ENSDARG00000020007	ENSG00000164692	col1a2	COL1A2	1.89189	0.0168232	NA	NA	1.80004	1.61272e-06	NA	NA	3.80228	7.03136e-07	ortholog_one2one	70.2782	71.0059	100	94.74	1	ortholog
ENSDARG00000020009	ENSG00000138756	bmp2k	BMP2K	NA	NA	0.615641	0.000102393	NA	NA	NA	NA	NA	NA	ortholog_one2one	34.2808	61.7054	100	59.58	1	ortholog
ENSDARG00000020015	ENSG00000090263	mrps33	MRPS33	1.09958	0.0110003	NA	NA	NA	NA	NA	NA	0.720827	0.0258203	ortholog_one2one	62.2642	62.2642	25	97.2	1	ortholog
ENSDARG00000020024	ENSG00000152380	fam151b	FAM151B	0.78847	0.0363617	NA	NA	NA	NA	NA	NA	NA	NA	ortholog_one2one	53.2609	49.6622	50	76.77	1	ortholog
ENSDARG00000020031	ENSG00000013297	cldn11a	CLDN11	3.67621	0.0181622	2.96558	0.0104485	1.7027	0.0430895	NA	NA	-2.44295	0.0025642	ortholog_many2many	57.4879	55.3488	50	74.13	1	ortholog
ENSDARG00000020053	ENSG00000140807	nkd1	NKD1	NA	NA	0.71634	0.0107041	0.645796	0.0422564	2.54575	3.74391e-05	NA	NA	ortholog_one2one	48.5106	51.8182	100	51.46	1	ortholog
ENSDARG00000020057	ENSG00000204217	bmpr2b	BMPR2	-1.8776	0.0240815	NA	NA	NA	NA	-0.777609	0.00903002	-1.40726	1.33783e-14	ortholog_one2one	68.0154	65.9197	25	93.16	1	ortholog
ENSDARG00000020079	ENSG00000109674	neil3	NEIL3	2.54723	0.0299512	3.88346	3.2624e-27	1.72943	0.000341275	2.19805	0.0464946	4.3195	2.77016e-18	ortholog_one2one	50.7438	54.0493	25	74.17	1	ortholog
ENSDARG00000020084	ENSG00000042832	tg	TG	4.28723	0.000201536	2.71726	1.06704e-05	NA	NA	NA	NA	NA	NA	ortholog_one2one	41.8714	42.2838	100	34.21	1	ortholog
ENSDARG00000020101	ENSG00000161057	psmc2	PSMC2	0.735544	4.12987e-06	NA	NA	NA	NA	NA	NA	0.704459	0.000502921	ortholog_one2one	98.8453	98.8453	0	97.2	1	ortholog
ENSDARG00000020107	ENSG00000036672	usp2a	USP2	-1.4138	0.000803128	-1.42631	5.83232e-18	-1.20092	1.63138e-15	NA	NA	-0.978933	0.048588	ortholog_one2one	47.1074	72.335	0	78.1	1	ortholog
ENSDARG00000020114	ENSG00000144136	slc20a1a	SLC20A1	2.30216	0.0170186	NA	NA	NA	NA	-1.29387	0.000238238	NA	NA	ortholog_one2many	60.972	63.4969	0	80.69	1	ortholog
ENSDARG00000020123	ENSG00000163050	coq8aa	COQ8A	-0.673071	0.0011664	NA	NA	NA	NA	NA	NA	NA	NA	ortholog_one2many	65.2241	68.1745	50	78.58	1	ortholog
ENSDARG00000020131	ENSG00000137942	fnbp1l	FNBP1L	-1.05524	0.00468481	NA	NA	NA	NA	NA	NA	0.689512	0.042141	ortholog_one2one	69.4215	76.6423	25	87.99	1	ortholog
ENSDARG00000020133	ENSG00000140044	jdp2b	JDP2	-1.09195	0.00904243	-1.70912	2.70824e-11	-2.11932	2.30401e-15	NA	NA	NA	NA	ortholog_one2many	63.8037	66.6667	25	70.89	1	ortholog
ENSDARG00000020134	ENSG00000197555	sipa1l1	SIPA1L1	-1.25933	4.93141e-05	NA	NA	NA	NA	-1.56111	0.00188193	-1.08765	0.0044155	ortholog_one2one	59.7308	59.3645	50	61.91	1	ortholog
ENSDARG00000020158	ENSG00000077327	spag6	SPAG6	1.07516	0.0387715	NA	NA	0.774908	0.0156915	NA	NA	-1.56736	0.0309016	ortholog_one2one	82.9077	83.2347	50	91.62	1	ortholog
ENSDARG00000020187	ENSG00000115271	GCA	GCA	1.07681	0.0157977	0.800001	0.0156393	NA	NA	NA	NA	NA	NA	ortholog_one2one	59.447	62.9268	0	59.28	1	ortholog
ENSDARG00000020191	ENSG00000086717	ppef1	PPEF1	NA	NA	-0.756982	1.83579e-05	NA	NA	-3.0295	0.00141593	-1.79375	0.0173832	ortholog_one2one	52.5268	47.0508	50	59.26	1	ortholog
ENSDARG00000020197	ENSG00000122406	rpl5a	RPL5	1.78009	7.37754e-09	1.07098	2.04712e-05	NA	NA	1.37877	0.000305456	1.54669	2.04719e-05	ortholog_one2many	84.5118	84.5118	50	99.67	1	ortholog
ENSDARG00000020219	ENSG00000198719	dld	DLL1	-1.85309	0.00019866	1.04863	0.00126802	1.41455	1.65028e-23	2.9361	7.71176e-07	NA	NA	ortholog_one2many	69.2946	69.8745	25	97.64	1	ortholog
ENSDARG00000020231	ENSG00000084764	mapre3a	MAPRE3	-2.17374	0.0024935	NA	NA	NA	NA	-2.11501	5.40263e-07	-2.52029	5.87963e-20	ortholog_one2many	76.8683	83.3977	25	63.51	1	ortholog
ENSDARG00000020232	ENSG00000242372	eif6	EIF6	1.63389	6.87375e-08	0.682609	0.00662972	NA	NA	NA	NA	0.684744	0.00540482	ortholog_one2many	89.7959	89.7959	50	98.66	1	ortholog
ENSDARG00000020235	ENSG00000184640	sept9a	SEPTIN9	3.05422	1.01147e-06	3.08794	4.97264e-05	1.1986	2.40525e-08	NA	NA	0.911399	0.00151795	ortholog_one2many	60.4096	60.3066	25	82.25	1	ortholog
ENSDARG00000020237	ENSG00000258839	mc1r	MC1R	NA	NA	2.04839	0.00943454	NA	NA	NA	NA	NA	NA	ortholog_one2one	55.836	54.7988	0	86.36	1	ortholog
ENSDARG00000020239	ENSG00000134324	lpin1	LPIN1	-1.18342	0.00199692	-0.85631	1.05026e-06	NA	NA	NA	NA	-1.21888	2.86076e-05	ortholog_one2many	60.4752	60.8696	0	78.56	1	ortholog
ENSDARG00000020242	ENSG00000073712	fermt2	FERMT2	NA	NA	0.716652	0.0290578	NA	NA	NA	NA	0.883316	0.0100635	ortholog_one2one	91.3235	90.7895	50	93.09	1	ortholog
ENSDARG00000020289	ENSG00000140451	pif1	PIF1	NA	NA	3.20425	1.32097e-06	NA	NA	1.93625	0.0158063	3.05366	2.93943e-10	ortholog_one2one	56.4743	56.651	0	60.61	1	ortholog
ENSDARG00000020298	ENSG00000159388	btg2	BTG2	-1.45265	5.02986e-05	-1.73244	1.80524e-20	-1.55106	4.63486e-06	NA	NA	NA	NA	ortholog_one2one	60.1266	57.5758	0	100	1	ortholog
ENSDARG00000020328	ENSG00000143850	plekha6	PLEKHA6	-0.701186	0.000477241	NA	NA	NA	NA	NA	NA	-1.77261	0.0205438	ortholog_one2one	52.3855	45.6739	100	62.92	1	ortholog
ENSDARG00000020387	ENSG00000136783	nipsnap3a	NIPSNAP3A	3.11341	1.35884e-05	1.4465	0.000980206	NA	NA	NA	NA	NA	NA	ortholog_one2many	57.8947	52.5735	50	86.2	1	ortholog
ENSDARG00000020405	ENSG00000105402	napab	NAPA	1.87575	5.6639e-07	1.2961	0.000828177	NA	NA	-1.23725	2.3739e-05	-0.852598	6.26739e-05	ortholog_one2many	84.0678	84.0678	0	81.18	1	ortholog
ENSDARG00000020442	ENSG00000089006	snx5	SNX5	1.11962	3.19565e-07	0.728157	0.00209226	NA	NA	0.861478	1.89866e-05	1.00987	1.73605e-07	ortholog_one2one	70.7921	71.6792	25	91.84	1	ortholog
ENSDARG00000020443	ENSG00000171044	xkr6a	XKR6	-2.1335	0.00329687	NA	NA	NA	NA	0.898039	0.0135086	0.96619	0.00793298	ortholog_one2many	68.6427	76.9231	0	63.53	1	ortholog
ENSDARG00000020448	ENSG00000182551	adi1	ADI1	1.61931	0.00207226	1.26261	0.00564993	NA	NA	NA	NA	0.768712	0.017846	ortholog_one2one	65.9218	65.1934	50	74.97	1	ortholog
ENSDARG00000020450	ENSG00000142408	cacng8a	CACNG8	-0.625095	0.0139174	-0.636932	0.00144011	NA	NA	-2.82103	0.000484232	-4.12833	4.02524e-09	ortholog_one2many	57.6471	56.713	25	64.73	1	ortholog
ENSDARG00000020454	ENSG00000099341	psmd8	PSMD8	1.09185	2.42914e-08	NA	NA	NA	NA	-0.789813	0.00547699	NA	NA	ortholog_one2one	63.1429	82.7715	25	86.48	1	ortholog
ENSDARG00000020465	ENSG00000182944	ewsr1b	EWSR1	1.00993	0.000590881	NA	NA	NA	NA	NA	NA	NA	NA	ortholog_one2many	50.7622	57.513	25	17.04	0	ortholog
ENSDARG00000020494	ENSG00000109445	znf330	ZNF330	0.957587	0.00083131	NA	NA	NA	NA	0.669602	0.00302706	NA	NA	ortholog_one2one	73.4375	73.4375	100	72.1	1	ortholog
ENSDARG00000020509	ENSG00000145545	srd5a1	SRD5A1	NA	NA	-0.910025	0.00215411	-0.631338	0.0411062	NA	NA	NA	NA	ortholog_one2one	52.1236	50.9434	100	61.84	1	ortholog
ENSDARG00000020527	ENSG00000213024	nup62l	NUP62	0.648019	0.00848282	NA	NA	NA	NA	NA	NA	0.722221	0.000309537	ortholog_one2one	48.8506	50.2959	0	35.29	0	ortholog
ENSDARG00000020541	ENSG00000101230	ism1	ISM1	1.90423	0.000108824	0.967533	0.00885452	0.743702	0.0443395	NA	NA	NA	NA	ortholog_one2one	68.1034	68.5466	75	78.19	1	ortholog
ENSDARG00000020595	ENSG00000130119	gnl3l	GNL3L	0.961417	0.0047745	NA	NA	NA	NA	NA	NA	NA	NA	ortholog_one2one	46.7354	48.1416	0	59.39	1	ortholog
ENSDARG00000020623	ENSG00000087088	baxa	BAX	1.13382	8.40292e-06	NA	NA	NA	NA	0.904568	0.0222043	1.39294	5.69063e-08	ortholog_one2many	48.9583	48.9583	0	61.93	1	ortholog
ENSDARG00000020625	ENSG00000162434	jak1	JAK1	1.05656	4.24711e-06	0.986179	4.41191e-08	NA	NA	NA	NA	NA	NA	ortholog_one2one	55.9792	56.0278	100	86.06	1	ortholog
ENSDARG00000020676	ENSG00000254986	dpp3	DPP3	NA	NA	0.613727	4.76664e-05	NA	NA	0.906652	0.000221945	0.674569	0.00024811	ortholog_one2one	67.2391	70.0138	0	91.17	1	ortholog
ENSDARG00000020679	ENSG00000125656	clpp	CLPP	1.52585	7.7757e-10	0.773372	0.000508566	NA	NA	NA	NA	1.02448	0.000152742	ortholog_one2one	66.787	69.5489	0	83.37	1	ortholog
ENSDARG00000020702	ENSG00000136811	odf2b	ODF2	1.4256	0.0041813	0.630773	0.0128081	NA	NA	NA	NA	0.794801	0.00139669	ortholog_one2many	32.9529	28.5185	0	31.53	0	ortholog
ENSDARG00000020711	ENSG00000171848	rrm2	RRM2	NA	NA	1.81893	0.0109475	NA	NA	5.31498	7.25134e-07	7.19098	1.55678e-62	ortholog_one2many	83.2905	83.9378	50	83.71	1	ortholog
ENSDARG00000020758	ENSG00000152154	tmem178	TMEM178A	-0.775503	0.0123812	-0.727315	6.70613e-05	-0.659273	1.44535e-18	-1.11929	0.0260514	-1.17229	0.01273	ortholog_one2one	71.0438	70.0997	25	100	1	ortholog
ENSDARG00000020761	ENSG00000105643	arrdc2	ARRDC2	2.15661	1.19907e-06	1.51695	3.59823e-05	NA	NA	NA	NA	-0.909871	0.0383373	ortholog_one2one	59.7052	59.7052	0	95.38	1	ortholog
ENSDARG00000020771	ENSG00000116147	tnr	TNR	-2.40866	1.30378e-05	NA	NA	NA	NA	NA	NA	NA	NA	ortholog_one2one	61.2666	61.6296	75	97.53	1	ortholog
ENSDARG00000020795	ENSG00000169750	rac3b	RAC3	-0.986193	6.91692e-05	NA	NA	NA	NA	NA	NA	NA	NA	ortholog_one2many	96.3542	96.3542	50	99.67	1	ortholog
ENSDARG00000020811	ENSG00000172638	efemp2b	EFEMP2	NA	NA	-0.706844	0.000501504	NA	NA	NA	NA	2.12544	7.74445e-08	ortholog_one2many	64.3341	64.7727	25	92.55	1	ortholog
ENSDARG00000020876	ENSG00000005882	pdk2a	PDK2	-1.37371	0.000393251	-0.783155	3.29003e-05	-0.805683	1.75433e-05	-1.05405	0.000515865	-1.36629	5.10106e-12	ortholog_one2many	73.4644	73.1051	0	79.73	1	ortholog
ENSDARG00000020929	ENSG00000153310	fam49ba	CYRIB	3.41607	6.01748e-11	2.69221	6.7608e-13	NA	NA	-0.674991	0.0132788	NA	NA	ortholog_one2many	78.3951	78.1538	50	10.08	1	ortholog
ENSDARG00000020956	ENSG00000100889	pck2	PCK2	2.50163	0.0138378	2.42933	0.000230132	NA	NA	NA	NA	0.97984	0.0103049	ortholog_one2one	66.25	66.6667	0	0	0	ortholog
ENSDARG00000020976	ENSG00000153443	ubald1b	UBALD1	NA	NA	1.19009	1.31849e-09	NA	NA	-0.799384	0.00655508	-1.09734	2.37071e-09	ortholog_one2one	58.7571	68.4211	25	65.3	1	ortholog
ENSDARG00000020979	ENSG00000042062	ripor3	RIPOR3	1.67141	0.0149333	NA	NA	NA	NA	NA	NA	2.24998	0.000214521	ortholog_one2one	37.4737	35.7071	0	26.63	0	ortholog
ENSDARG00000020981	ENSG00000117620	slc35a3b	SLC35A3	NA	NA	2.41339	0.0499545	NA	NA	NA	NA	NA	NA	ortholog_one2many	74.7692	66.7582	0	80.69	1	ortholog
ENSDARG00000020982	ENSG00000163637	prickle2a	PRICKLE2	-0.600214	0.0418738	NA	NA	NA	NA	-1.02674	0.00359522	-1.60529	3.20517e-08	ortholog_one2many	54.8578	53.2796	25	56.64	1	ortholog
ENSDARG00000020984	ENSG00000112394	slc16a10	SLC16A10	1.5718	0.0017377	0.696649	0.0306362	NA	NA	NA	NA	1.53193	0.0386872	ortholog_one2one	63.6893	64.9505	25	86.9	1	ortholog
ENSDARG00000021032	ENSG00000187140	foxd3	FOXD3	NA	NA	NA	NA	6.64392	8.67173e-08	5.32988	0.00157046	6.57319	7.41596e-10	ortholog_one2one	56.4854	72.7763	100	97.31	1	ortholog
ENSDARG00000021046	ENSG00000144468	rhbdd1	RHBDD1	1.25797	0.00720582	NA	NA	NA	NA	0.822721	0.000377288	NA	NA	ortholog_one2one	58.4127	54.9254	75	51.95	1	ortholog
ENSDARG00000021086	ENSG00000165244	znf367	ZNF367	NA	NA	3.37017	7.92887e-17	1.18651	0.0167687	1.51474	0.0155804	1.61794	0.000271753	ortholog_one2one	64	70.8861	50	89.65	1	ortholog
ENSDARG00000021107	ENSG00000104897	sf3a2	SF3A2	1.05511	0.00212606	NA	NA	NA	NA	1.22901	0.000710827	0.780046	0.00361429	ortholog_one2one	52.1552	87.0504	25	77.79	1	ortholog
ENSDARG00000021112	ENSG00000197223	c1d	C1D	1.28069	0.0140089	NA	NA	NA	NA	NA	NA	NA	NA	ortholog_one2one	58.156	55.4054	0	99.13	1	ortholog
ENSDARG00000021124	ENSG00000172757	cfl1	CFL1	0.903583	0.00170322	NA	NA	NA	NA	NA	NA	NA	NA	ortholog_one2one	74.6988	75.1515	0	98.04	1	ortholog
ENSDARG00000021137	ENSG00000164199	adgrv1	ADGRV1	-1.54204	0.0013784	NA	NA	NA	NA	NA	NA	-1.21031	0.0464288	ortholog_one2one	52.0457	52.9526	100	77.4	1	ortholog
ENSDARG00000021141	ENSG00000175895	plekhf2	PLEKHF2	NA	NA	1.18486	1.03042e-05	NA	NA	1.13804	0.0107189	1.6856	9.25156e-13	ortholog_one2one	82.7309	83.4008	25	100	1	ortholog
ENSDARG00000021239	ENSG00000120868	apaf1	APAF1	1.18112	1.61955e-05	0.637706	0.00443279	NA	NA	NA	NA	-0.813636	0.00047659	ortholog_one2one	54.9679	54.4013	50	77.65	1	ortholog
ENSDARG00000021242	ENSG00000013364	mvp	MVP	2.92913	1.94134e-14	2.32315	3.1537e-10	NA	NA	NA	NA	NA	NA	ortholog_one2one	66.4054	68.2394	0	95.06	1	ortholog
ENSDARG00000021250	ENSG00000145832	slc25a48	SLC25A48	-1.86594	0.00474921	-1.13033	0.0227145	NA	NA	NA	NA	-1.88694	0.033494	ortholog_one2one	61.4148	61.8123	0	82.59	1	ortholog
ENSDARG00000021252	ENSG00000132141	cct6a	CCT6B	0.599092	0.00112923	0.668595	0.000467652	NA	NA	NA	NA	NA	NA	ortholog_one2one	83.9623	83.8041	0	100	1	ortholog
ENSDARG00000021255	ENSG00000128805	arhgap22	ARHGAP22	NA	NA	0.796008	0.0209612	NA	NA	NA	NA	-1.31823	0.00363397	ortholog_one2many	29.2264	48.8038	50	60.72	1	ortholog
ENSDARG00000021257	ENSG00000100353	eif3d	EIF3D	0.759314	0.000158645	NA	NA	NA	NA	0.949382	0.000260921	0.813766	0.00026194	ortholog_one2one	90.6934	90.0362	0	99.08	1	ortholog
ENSDARG00000021265	ENSG00000086967	mybpc2b	MYBPC2	NA	NA	-1.26753	0.00448982	NA	NA	-2.59466	0.00233169	-1.53322	0.0399082	ortholog_one2one	59.5968	61.2061	0	23.89	0	ortholog
ENSDARG00000021288	ENSG00000155545	mier3b	MIER3	-0.917567	0.0366978	NA	NA	NA	NA	NA	NA	NA	NA	ortholog_one2many	60.1818	61.6387	50	98.05	1	ortholog
ENSDARG00000021339	ENSG00000091704	cpa5	CPA1	7.56731	0.0110161	NA	NA	NA	NA	NA	NA	NA	NA	ortholog_one2many	63.7232	63.7232	25	83.15	1	ortholog
ENSDARG00000021343	ENSG00000109046	wsb1	WSB1	0.766668	0.00505969	NA	NA	NA	NA	NA	NA	NA	NA	ortholog_one2one	75.0594	74.7045	25	91.72	1	ortholog
ENSDARG00000021372	ENSG00000141232	tob1b	TOB1	-0.810901	0.0033479	NA	NA	NA	NA	NA	NA	NA	NA	ortholog_one2many	77.3913	82.9193	25	97.24	1	ortholog
ENSDARG00000021383	ENSG00000077616	naalad2	NAALAD2	NA	NA	-0.87518	0.0384244	NA	NA	NA	NA	NA	NA	ortholog_one2many	67.027	66.5772	75	75.18	1	ortholog
ENSDARG00000021405	ENSG00000170004	chd3	CHD3	-0.767858	0.000487666	NA	NA	NA	NA	-1.15587	0.00123893	-1.99987	1.03557e-07	ortholog_one2one	72.4	79.5604	25	90.05	1	ortholog
ENSDARG00000021443	ENSG00000185650	zfp36l1b	ZFP36L1	1.13046	0.0016269	1.44644	1.13931e-05	NA	NA	NA	NA	0.903153	0.00827832	ortholog_one2many	63.0177	61.2069	0	88.9	1	ortholog
ENSDARG00000021455	ENSG00000165209	strbp	STRBP	-0.896207	0.0393196	NA	NA	NA	NA	-0.696346	0.0129055	-0.85898	0.000497573	ortholog_one2one	78.2738	76.2319	0	91.2	1	ortholog
ENSDARG00000021462	ENSG00000123977	daw1	DAW1	1.64005	0.032697	1.25735	0.00516197	NA	NA	NA	NA	NA	NA	ortholog_one2one	71.3253	70.8134	50	89.22	1	ortholog
ENSDARG00000021480	ENSG00000162745	olfml2bb	OLFML2B	NA	NA	-1.14125	0.0044493	-1.08349	0.016718	NA	NA	2.19234	0.000688885	ortholog_one2many	46.5333	50.4335	25	53.34	1	ortholog
ENSDARG00000021539	ENSG00000133216	ephb2b	EPHB2	-1.05494	0.00061253	NA	NA	NA	NA	NA	NA	NA	NA	ortholog_one2many	87.931	87.6643	25	97.89	1	ortholog
ENSDARG00000021547	ENSG00000028116	vrk2	VRK2	NA	NA	0.590991	0.000848337	NA	NA	NA	NA	NA	NA	ortholog_one2one	45.6693	40.4181	75	55.94	1	ortholog
ENSDARG00000021555	ENSG00000185345	prkn	PRKN	-1.28545	8.20068e-05	-0.739078	1.69064e-06	NA	NA	-1.52843	0.00014763	-2.24968	1.36285e-17	ortholog_one2one	47.3118	48.0349	0	53.54	1	ortholog
ENSDARG00000021572	ENSG00000164430	cgas	CGAS	NA	NA	4.67959	4.15435e-07	NA	NA	NA	NA	1.66719	0.000154358	ortholog_one2one	30.6513	27.027	100	26.91	1	ortholog
ENSDARG00000021579	ENSG00000164815	orc5	ORC5	1.55782	0.0104081	0.747702	0.016811	NA	NA	NA	NA	NA	NA	ortholog_one2one	66.4368	65.0901	25	73.38	1	ortholog
ENSDARG00000021584	ENSG00000149972	cntn5	CNTN5	-0.721413	0.0443669	NA	NA	NA	NA	-2.91666	0.00772891	-3.06594	3.84698e-05	ortholog_one2one	62.9091	65.5303	50	72.97	1	ortholog
ENSDARG00000021590	ENSG00000187391	magi2a	MAGI2	-0.870089	0.0157866	NA	NA	NA	NA	NA	NA	-0.706183	0.0270866	ortholog_one2many	65.0172	62.9408	0	79.35	1	ortholog
ENSDARG00000021607	ENSG00000172260	negr1	NEGR1	-1.65555	0.000231135	NA	NA	NA	NA	-2.31659	0.00208949	-4.14388	7.55939e-09	ortholog_one2one	61.0169	62.4277	50	83.45	1	ortholog
ENSDARG00000021633	ENSG00000185437	sh3bgr	SH3BGR	NA	NA	0.691059	0.00030795	NA	NA	NA	NA	NA	NA	ortholog_one2many	45.4545	43.2432	0	29.63	0	ortholog
ENSDARG00000021669	ENSG00000058262	sec61a1	SEC61A1	0.649715	2.42933e-05	0.705198	8.57402e-05	NA	NA	1.07475	0.000100044	1.56903	9.74441e-15	ortholog_one2many	97.0588	97.0588	0	94.9	1	ortholog
ENSDARG00000021677	ENSG00000136147	phf11	PHF11	2.50045	8.43054e-07	3.33136	3.83346e-11	0.859418	5.68225e-06	NA	NA	NA	NA	ortholog_one2one	22.0544	13.7476	0	0	0	ortholog
ENSDARG00000021697	ENSG00000139714	morn3	MORN3	NA	NA	1.48885	0.000268011	NA	NA	NA	NA	NA	NA	ortholog_one2one	51.25	48.6166	100	66.22	1	ortholog
ENSDARG00000021753	ENSG00000147419	ccdc25	CCDC25	1.11895	0.00559308	NA	NA	NA	NA	NA	NA	NA	NA	ortholog_one2one	78.8462	79.2271	100	83.88	1	ortholog
ENSDARG00000021794	ENSG00000072571	hmmr	HMMR	NA	NA	2.94371	2.41193e-12	NA	NA	2.57901	0.00234892	4.06316	1.52105e-18	ortholog_one2one	34.8966	28.0177	25	0	0	ortholog
ENSDARG00000021805	ENSG00000104964	tle5	TLE5	-2.10409	0.0158767	NA	NA	NA	NA	-1.16313	0.00128978	-0.777595	0.00918362	ortholog_one2many	83.2487	83.2487	25	75.81	1	ortholog
ENSDARG00000021806	ENSG00000152518	zfp36l2	ZFP36L2	0.739459	0.0148622	1.02192	4.90396e-06	NA	NA	1.07366	0.0182295	1.62156	2.90371e-07	ortholog_one2one	41.9028	55.496	50	71.03	1	ortholog
ENSDARG00000021827	ENSG00000186625	katna1	KATNA1	2.30355	0.00438723	1.1685	0.0243011	NA	NA	0.966281	2.67772e-05	1.00825	1.72102e-07	ortholog_one2one	76.3747	77.3196	0	82.41	1	ortholog
ENSDARG00000021838	ENSG00000186468	rps23	RPS23	1.88846	1.46424e-05	1.03618	7.09546e-05	NA	NA	1.08556	0.00189563	0.862297	0.00177541	ortholog_one2one	98.6014	98.6014	0	99.1	1	ortholog
ENSDARG00000021846	ENSG00000167861	hid1a	HID1	-1.23445	0.0157699	NA	NA	NA	NA	-1.71504	0.00102996	-2.76161	1.84514e-13	ortholog_one2one	19.2893	73.7864	50	54.71	0	ortholog
ENSDARG00000021859	ENSG00000164307	erap1b	ERAP1	0.819688	0.0130068	1.07847	2.00381e-10	NA	NA	NA	NA	0.732171	0.042508	ortholog_one2many	60.9989	59.7917	0	92.72	1	ortholog
ENSDARG00000021864	ENSG00000137818	rplp1	RPLP1	1.88074	2.83907e-07	1.3128	3.9557e-08	NA	NA	1.37712	0.000771005	1.48192	2.29052e-06	ortholog_one2one	80.7018	81.4159	0	98.61	1	ortholog
ENSDARG00000021869	ENSG00000172348	rcan2	RCAN2	-2.12985	0.00180172	NA	NA	NA	NA	-2.5782	0.00292178	-3.07291	1.35426e-05	ortholog_one2one	69.1358	70.5882	25	68.23	1	ortholog
ENSDARG00000021891	ENSG00000160685	zbtb7b	ZBTB7B	1.02741	0.0296361	NA	NA	NA	NA	NA	NA	NA	NA	ortholog_one2one	38.4045	44.3255	0	52.51	1	ortholog
ENSDARG00000021895	ENSG00000162946	disc1	DISC1	NA	NA	1.17931	0.000964837	NA	NA	1.55475	0.00248652	1.23076	0.000556496	ortholog_one2one	26.9321	23.1388	75	3.85	0	ortholog
ENSDARG00000021899	ENSG00000027847	b4galt7	B4GALT7	0.634664	0.0194574	NA	NA	NA	NA	NA	NA	NA	NA	ortholog_one2one	63.9144	65.9306	25	92.65	1	ortholog
ENSDARG00000021905	ENSG00000136986	derl1	DERL1	0.620469	0.00403787	NA	NA	NA	NA	NA	NA	NA	NA	ortholog_one2one	86.4542	83.1418	0	100	1	ortholog
ENSDARG00000021909	ENSG00000170419	VSTM2A	VSTM2A	-2.24746	0.0366612	NA	NA	NA	NA	NA	NA	NA	NA	ortholog_one2one	51.6667	54.1485	0	80.85	1	ortholog
ENSDARG00000021948	ENSG00000041982	tnc	TNC	-1.28582	0.00657462	NA	NA	NA	NA	3.0338	0.000243821	3.84468	6.00223e-15	ortholog_one2many	45.0704	54.7764	0	80.95	1	ortholog
ENSDARG00000021982	ENSG00000087266	sh3bp2	SH3BP2	NA	NA	1.99928	1.84012e-08	NA	NA	1.11819	0.00948648	1.28442	7.32247e-07	ortholog_one2one	42.959	48.7854	0	29.42	0	ortholog
ENSDARG00000021984	ENSG00000131495	ndufa2	NDUFA2	0.897484	0.0366087	NA	NA	NA	NA	NA	NA	NA	NA	ortholog_one2one	64.6465	63.3663	25	69.72	1	ortholog
ENSDARG00000022101	ENSG00000154358	obscnb	OBSCN	-1.83654	0.0379998	-0.707774	0.00121583	NA	NA	-1.43485	0.048253	-1.96018	0.00117169	ortholog_one2one	8.32493	44.759	0	58.84	0	ortholog
ENSDARG00000022165	ENSG00000008394	mgst1.2	MGST1	2.10291	0.00368758	NA	NA	NA	NA	NA	NA	NA	NA	ortholog_one2many	55.4839	56.5789	50	79.72	1	ortholog
ENSDARG00000022232	ENSG00000130810	ppan	PPAN	1.15528	0.0035369	NA	NA	NA	NA	NA	NA	NA	NA	ortholog_one2many	55.814	50.5747	25	74.68	1	ortholog
ENSDARG00000022303	ENSG00000181061	higd1a	HIGD1A	1.09588	0.00306135	NA	NA	-0.723704	1.48889e-09	NA	NA	NA	NA	ortholog_many2many	65.5914	61.6162	25	46.56	0	ortholog
ENSDARG00000022309	ENSG00000096696	dspa	DSP	1.397	0.00474594	1.76274	4.63392e-05	NA	NA	NA	NA	-1.90224	0.000958135	ortholog_one2many	35.2142	49.1015	0	62.87	1	ortholog
ENSDARG00000022315	ENSG00000136888	atp6v1g1	ATP6V1G1	0.601348	0.0286666	NA	NA	NA	NA	NA	NA	0.601451	0.0317776	ortholog_one2one	70.339	70.339	0	100	1	ortholog
ENSDARG00000022399	ENSG00000148335	ntmt1	NTMT1	1.37867	0.00145765	NA	NA	NA	NA	NA	NA	NA	NA	ortholog_one2one	71.7489	65.8436	50	93.79	1	ortholog
ENSDARG00000022437	ENSG00000110651	cd81b	CD81	NA	NA	-2.29691	6.93075e-07	-1.0253	0.0292696	0.984987	0.00856975	0.711173	0.00628406	ortholog_one2many	55.0847	54.6218	0	70.53	1	ortholog
ENSDARG00000022438	ENSG00000156885	cox6a1	COX6A2	0.887329	0.00623274	NA	NA	NA	NA	NA	NA	NA	NA	ortholog_many2many	60.8247	54.6296	0	71.21	1	ortholog
ENSDARG00000022466	ENSG00000171365	clcn5b	CLCN5	1.55277	3.84012e-06	1.55405	1.26686e-06	NA	NA	NA	NA	NA	NA	ortholog_one2many	75.4902	75.9556	25	84.3	1	ortholog
ENSDARG00000022509	ENSG00000131055	cox4i2	COX4I2	NA	NA	0.735677	0.00159941	NA	NA	NA	NA	1.05072	0.0351757	ortholog_one2one	46.1988	44.6328	25	50	1	ortholog
ENSDARG00000022518	ENSG00000114757	pex5la	PEX5L	NA	NA	-0.826705	0.00253784	NA	NA	-1.87078	0.0325836	-4.33156	3.08728e-09	ortholog_one2many	61.5016	63.9535	50	66.56	1	ortholog
ENSDARG00000022525	ENSG00000128285	mchr1b	MCHR1	NA	NA	-0.76211	0.0181865	-0.883037	0.001358	NA	NA	NA	NA	ortholog_one2many	43.128	50	0	71.29	1	ortholog
ENSDARG00000022599	ENSG00000123992	dnpep	DNPEP	0.726469	0.0110719	NA	NA	NA	NA	NA	NA	0.764696	6.47238e-05	ortholog_one2one	67.0103	69.2964	25	88.31	1	ortholog
ENSDARG00000022652	ENSG00000125818	psmf1	PSMF1	NA	NA	0.663834	0.0289198	NA	NA	NA	NA	NA	NA	ortholog_one2one	47.6015	47.4265	75	32.72	1	ortholog
ENSDARG00000022668	ENSG00000154016	grapb	GRAP	-1.37933	0.0410641	NA	NA	NA	NA	1.17451	0.0276539	1.89649	1.80209e-06	ortholog_many2many	57.1429	57.9439	50	53.86	1	ortholog
ENSDARG00000022712	ENSG00000168610	stat3	STAT3	1.22689	0.00942954	2.19651	6.01508e-35	NA	NA	0.635913	0.0346443	0.873129	6.25326e-05	ortholog_one2one	88.3117	84.3672	50	88.6	1	ortholog
ENSDARG00000022730	ENSG00000157426	aasdh	AASDH	-1.06312	0.00369658	NA	NA	NA	NA	0.595286	0.0252977	NA	NA	ortholog_one2one	41.439	39.4965	75	31.33	1	ortholog
ENSDARG00000022763	ENSG00000115756	hpcal1	HPCAL1	-1.97696	3.55863e-05	-0.656548	0.031316	NA	NA	-1.63045	0.00212799	-1.71577	4.59062e-09	ortholog_one2one	91.1917	91.1917	0	100	1	ortholog
ENSDARG00000022795	ENSG00000111711	golt1ba	GOLT1B	0.88231	0.0271314	NA	NA	NA	NA	NA	NA	NA	NA	ortholog_one2many	82.6087	82.6087	50	75.56	1	ortholog
ENSDARG00000022841	ENSG00000120899	ptk2ba	PTK2B	3.80502	1.27931e-05	2.40695	2.14153e-10	NA	NA	-2.33424	0.00037779	-2.41952	3.05851e-10	ortholog_one2many	57.78	62.4866	50	74.19	1	ortholog
ENSDARG00000022895	ENSG00000101977	mcf2a	MCF2	NA	NA	-0.802521	0.000193694	-0.703515	2.65213e-05	NA	NA	-3.53293	2.64957e-06	ortholog_one2many	52	43.2943	75	27.62	1	ortholog
ENSDARG00000022971	ENSG00000080224	epha6	EPHA6	-0.911924	5.65907e-06	-0.837744	7.03648e-06	-0.586446	8.0584e-14	-2.86044	0.00991611	-4.99263	8.61329e-07	ortholog_one2one	67.8761	76.6234	75	68.17	1	ortholog
ENSDARG00000022996	ENSG00000107290	setx	SETX	-0.742697	0.0460427	0.843932	0.00175501	NA	NA	NA	NA	-0.586654	0.0054889	ortholog_many2many	29.6974	33.5726	50	30.49	1	ortholog
ENSDARG00000023002	ENSG00000143476	dtl	DTL	NA	NA	2.95032	3.09476e-09	NA	NA	3.5824	0.000102095	4.83043	5.29012e-25	ortholog_one2one	46.0274	51.932	25	50.99	1	ortholog
ENSDARG00000023026	ENSG00000057294	pkp2	PKP2	NA	NA	0.606779	0.0174245	NA	NA	NA	NA	NA	NA	ortholog_one2one	33.5723	34.4785	0	25.64	0	ortholog
ENSDARG00000023028	ENSG00000091527	cdv3	CDV3	0.878139	0.0116707	0.637531	0.0025348	NA	NA	NA	NA	NA	NA	ortholog_one2one	45.7364	50	25	45.19	0	ortholog
ENSDARG00000023053	ENSG00000135842	niban1b	NIBAN1	2.72784	7.64369e-07	3.11016	2.11831e-09	NA	NA	NA	NA	3.02478	1.27161e-08	ortholog_one2many	35.3448	40.1469	25	51.15	1	ortholog
ENSDARG00000023062	ENSG00000142871	ccn1	CCN1	1.80404	0.0241626	1.42766	2.61544e-06	NA	NA	NA	NA	1.53005	0.0484258	ortholog_one2one	64.5669	66.6667	25	92.31	1	ortholog
ENSDARG00000023117	ENSG00000047932	gopc	GOPC	-1.36218	0.0239451	NA	NA	NA	NA	NA	NA	-0.720605	0.00410669	ortholog_one2many	75.5411	76.7033	75	85.33	1	ortholog
ENSDARG00000023151	ENSG00000109424	ucp1	UCP1	NA	NA	-0.615243	0.0153526	NA	NA	NA	NA	3.02591	0.00922792	ortholog_one2one	60.9121	60.5178	75	61.57	1	ortholog
ENSDARG00000023188	ENSG00000136167	lcp1	LCP1	2.67226	2.12007e-10	3.1721	7.2718e-30	1.09869	1.7803e-06	NA	NA	1.82843	9.19828e-05	ortholog_one2one	82.4561	82.8526	0	79.84	1	ortholog
ENSDARG00000023217	ENSG00000095794	crema	CREM	-2.01458	0.000537203	NA	NA	-0.818096	1.28145e-11	NA	NA	NA	NA	ortholog_one2one	33.0855	80.9091	25	12.4	0	ortholog
ENSDARG00000023228	ENSG00000163032	vsnl1a	VSNL1	-0.936506	0.021682	-0.627524	0.00888792	NA	NA	-3.20108	0.024133	-4.99552	4.70335e-08	ortholog_one2many	95.8115	95.8115	0	100	1	ortholog
ENSDARG00000023287	ENSG00000130948	hsd17b3	HSD17B3	NA	NA	-1.0981	4.76437e-11	-0.809105	0.000151909	NA	NA	NA	NA	ortholog_one2one	34.1936	44.9153	50	32.07	1	ortholog
ENSDARG00000023299	ENSG00000100138	snu13b	SNU13	1.98776	1.33425e-08	0.957953	0.00115612	NA	NA	-0.69603	0.011795	-0.922625	0.000186925	ortholog_one2many	90.625	90.625	0	99.24	1	ortholog
ENSDARG00000023330	ENSG00000136938	anp32b	ANP32B	1.26789	2.35104e-07	0.696274	0.000702334	NA	NA	1.56009	7.40425e-07	0.936425	5.27416e-05	ortholog_one2one	77.2908	74.9035	25	68.1	1	ortholog
ENSDARG00000023448	ENSG00000158089	galnt14	GALNT14	NA	NA	-0.677176	1.09378e-07	-0.639972	5.06685e-10	-1.79791	0.0207728	-2.53985	6.76441e-05	ortholog_one2one	59.7826	59.5668	0	47.31	0	ortholog
ENSDARG00000023495	ENSG00000096872	ift74	IFT74	0.952746	0.000204563	NA	NA	NA	NA	NA	NA	NA	NA	ortholog_one2one	58.3333	60.0343	25	42.01	0	ortholog
ENSDARG00000023498	ENSG00000144591	gmppab	GMPPA	1.19747	2.7961e-05	0.922921	0.000626522	NA	NA	0.927085	0.00524168	0.837514	1.5001e-05	ortholog_one2many	70.9524	70.6161	50	96.97	1	ortholog
ENSDARG00000023526	ENSG00000100121	ggt1a	GGTLC2	4.90626	0.0017377	NA	NA	NA	NA	NA	NA	NA	NA	ortholog_many2many	57.9365	25.2159	0	62.03	1	ortholog
ENSDARG00000023532	ENSG00000254093	pinx1	PINX1	1.90537	0.000344301	NA	NA	NA	NA	NA	NA	0.717258	0.00266988	ortholog_one2one	49.6951	45.9155	50	42	1	ortholog
ENSDARG00000023546	ENSG00000105642	kcnn1b	KCNN1	-1.13988	0.00305963	NA	NA	NA	NA	-2.07144	0.00309348	-3.35741	2.96166e-09	ortholog_one2many	30.9392	71.4894	25	51.27	1	ortholog
ENSDARG00000023578	ENSG00000145012	lpp	LPP	1.46165	0.0248731	1.14602	0.00244617	NA	NA	0.907307	0.0227929	1.02584	0.00172977	ortholog_one2one	60.7843	66.9065	50	70.41	1	ortholog
ENSDARG00000023584	ENSG00000097046	cdc7	CDC7	NA	NA	2.33851	5.33067e-06	1.26993	0.0286308	NA	NA	NA	NA	ortholog_one2one	47.2125	59.0414	0	60.35	1	ortholog
ENSDARG00000023587	ENSG00000164626	kcnk5a	KCNK5	NA	NA	2.70525	3.93033e-08	NA	NA	NA	NA	NA	NA	ortholog_one2many	49.8998	48.538	50	61.05	1	ortholog
ENSDARG00000023672	ENSG00000126953	timm8a	TIMM8A	1.05591	0.0054869	NA	NA	NA	NA	NA	NA	NA	NA	ortholog_one2one	71.134	76.6667	0	90.22	1	ortholog
ENSDARG00000023683	ENSG00000102001	cacna1fb	CACNA1F	-1.02772	0.0482066	NA	NA	NA	NA	-2.81811	8.62243e-05	-3.06691	1.0901e-12	ortholog_one2one	69.3794	66.0533	25	70.06	1	ortholog
ENSDARG00000023713	ENSG00000240583	aqp1a.1	AQP1	1.36213	0.00911584	NA	NA	NA	NA	3.77717	0.000940596	2.8235	0.00011103	ortholog_many2many	57.9926	60	0	74.55	1	ortholog
ENSDARG00000023722	ENSG00000137252	hcrtr2	HCRTR2	-1.82361	0.0032756	-1.03664	1.17567e-05	-1.01787	0.000171397	NA	NA	-4.33816	0.000211243	ortholog_one2one	67.1171	70.283	100	90.84	1	ortholog
ENSDARG00000023724	ENSG00000197622	cdc42se1	CDC42SE1	NA	NA	2.01827	1.26686e-06	NA	NA	0.669458	0.00314827	0.678287	0.000145501	ortholog_one2one	53.1646	56	75	60.76	1	ortholog
ENSDARG00000023768	ENSG00000174514	mfsd4aa	MFSD4A	NA	NA	NA	NA	0.933945	0.0184969	-2.98016	0.000678026	-4.30894	5.27472e-19	ortholog_one2many	53.6965	52.4715	50	87.06	1	ortholog
ENSDARG00000023815	ENSG00000198382	uvrag	UVRAG	-0.723912	0.000267966	NA	NA	NA	NA	NA	NA	-1.05342	1.33572e-13	ortholog_one2one	56.7954	59.7892	100	71.76	1	ortholog
ENSDARG00000023852	ENSG00000130520	lsm4	LSM4	1.10287	0.00691814	NA	NA	NA	NA	NA	NA	NA	NA	ortholog_one2one	84.1727	81.8182	0	76.93	1	ortholog
ENSDARG00000023858	ENSG00000154781	ccdc174	CCDC174	0.667584	0.0290658	NA	NA	NA	NA	0.714372	0.00125103	NA	NA	ortholog_one2one	53.5332	54.3478	0	76.82	1	ortholog
ENSDARG00000023900	ENSG00000127995	casd1	CASD1	-0.881331	0.0484481	NA	NA	NA	NA	-0.609996	0.045493	-1.06036	5.39151e-05	ortholog_one2one	67.2522	66.5012	100	93.33	1	ortholog
ENSDARG00000023914	ENSG00000007047	mark4a	MARK4	-2.37604	0.00337136	NA	NA	NA	NA	-1.09176	6.27422e-05	-1.09908	6.42185e-07	ortholog_one2many	65.9574	67.3913	0	45.78	0	ortholog
ENSDARG00000023933	ENSG00000136603	skila	SKIL	-1.68471	0.0299182	NA	NA	NA	NA	NA	NA	NA	NA	ortholog_one2many	47.6608	52.3274	25	59.9	1	ortholog
ENSDARG00000023958	ENSG00000168894	rnf181	RNF181	1.52603	1.71035e-05	NA	NA	NA	NA	NA	NA	0.746606	0.0171338	ortholog_one2one	65.3595	64.1026	25	77.27	1	ortholog
ENSDARG00000023989	ENSG00000162517	pef1	PEF1	0.703107	0.0370215	NA	NA	NA	NA	NA	NA	NA	NA	ortholog_one2one	57.0423	60	0	60.02	1	ortholog
ENSDARG00000024026	ENSG00000132581	sdf2	SDF2	0.873881	0.00179636	NA	NA	NA	NA	NA	NA	0.650282	0.00744596	ortholog_one2one	67.7725	64.4144	25	81.48	1	ortholog
ENSDARG00000024047	ENSG00000072954	tmem38a	TMEM38A	NA	NA	-0.711107	0.00639185	NA	NA	-1.70053	0.00247608	-1.57129	0.000181539	ortholog_one2one	70.903	71.8644	25	100	1	ortholog
ENSDARG00000024101	ENSG00000171873	adra1d	ADRA1D	-1.00473	0.0492599	-1.05337	8.00009e-09	-0.879768	2.65213e-05	NA	NA	NA	NA	ortholog_one2one	49.8252	58.0448	25	67.71	1	ortholog
ENSDARG00000024124	ENSG00000143751	sde2	SDE2	-0.876161	0.029455	NA	NA	NA	NA	0.818065	0.00357406	NA	NA	ortholog_one2one	44.1242	40.8624	0	41.09	0	ortholog
ENSDARG00000024195	ENSG00000186918	znf395b	ZNF395	-0.962275	1.14793e-06	-0.687559	4.10538e-05	-1.70582	6.75268e-85	NA	NA	NA	NA	ortholog_one2many	32.5536	43.1525	50	42.43	1	ortholog
ENSDARG00000024204	ENSG00000112118	mcm3	MCM3	2.02691	7.53577e-05	3.32325	4.66277e-22	1.37872	7.84089e-07	1.18772	0.000498719	1.62624	1.33481e-08	ortholog_one2one	75.1238	75.2169	25	89.03	1	ortholog
ENSDARG00000024209	ENSG00000158195	wasf2	WASF2	2.48785	3.16137e-08	3.07032	2.16125e-12	1.10391	2.70057e-05	0.879279	0.0228892	0.613508	0.0187824	ortholog_one2one	65.4618	67.0782	100	49.97	1	ortholog
ENSDARG00000024211	ENSG00000111537	ifng1	IFNG	NA	NA	3.14108	0.0455734	NA	NA	NA	NA	NA	NA	ortholog_one2many	22.2892	20.6704	100	0	0	ortholog
ENSDARG00000024277	ENSG00000143315	pigm	PIGM	1.01598	0.0141881	NA	NA	NA	NA	0.944408	0.00121535	NA	NA	ortholog_one2one	51.3002	55.3571	0	78.49	1	ortholog
ENSDARG00000024295	ENSG00000110911	slc11a2	SLC11A2	0.806264	0.016134	NA	NA	NA	NA	NA	NA	NA	NA	ortholog_one2one	29.4118	71.4286	0	43.29	0	ortholog
ENSDARG00000024299	ENSG00000172247	c1qtnf4	C1QTNF4	NA	NA	-0.642896	9.29143e-06	NA	NA	-2.85411	0.000525101	-3.72841	1.2285e-10	ortholog_one2many	56.535	48.8189	25	93.42	1	ortholog
ENSDARG00000024314	ENSG00000051108	herpud1	HERPUD1	0.843608	0.00287362	NA	NA	NA	NA	NA	NA	NA	NA	ortholog_one2one	44.2455	43.0348	100	45.72	1	ortholog
ENSDARG00000024325	ENSG00000113163	cert1a	CERT1	-1.42683	1.23426e-07	-0.695178	0.00786277	NA	NA	-0.895238	0.00087569	-1.23082	1.30816e-10	ortholog_one2many	75.8013	76.2903	50	88.59	1	ortholog
ENSDARG00000024416	ENSG00000105849	twistnb	POLR1F	1.1517	0.0148657	NA	NA	NA	NA	NA	NA	NA	NA	ortholog_one2one	45.2663	39.2308	0	52.79	1	ortholog
ENSDARG00000024431	ENSG00000134954	ets1	ETS1	NA	NA	0.66392	0.0282652	NA	NA	1.34504	0.0184445	1.24845	0.000355451	ortholog_one2one	42.0619	76.6917	50	77.02	1	ortholog
ENSDARG00000024465	ENSG00000096080	mrps18a	MRPS18A	0.77397	0.0410641	NA	NA	NA	NA	NA	NA	NA	NA	ortholog_one2one	55.6122	51.9048	25	73.88	1	ortholog
ENSDARG00000024471	ENSG00000117697	nsl1	NSL1	NA	NA	2.34194	0.00486912	NA	NA	0.806998	1.02562e-05	0.913096	0.00211575	ortholog_one2one	23.1317	27.3109	100	0	0	ortholog
ENSDARG00000024488	ENSG00000131747	top2a	TOP2A	NA	NA	3.05076	1.18099e-05	1.36098	4.54192e-05	5.8457	6.24602e-08	7.17572	8.96399e-49	ortholog_one2one	68.1254	66.4331	0	76.21	1	ortholog
ENSDARG00000024537	ENSG00000138080	emilin1a	EMILIN1	2.08025	0.0176323	2.4585	5.91809e-13	1.98936	1.29936e-05	NA	NA	2.18593	0.000278888	ortholog_one2many	34.4488	34.5168	0	49.93	0	ortholog
ENSDARG00000024546	ENSG00000116711	pla2g4aa	PLA2G4A	NA	NA	1.54595	0.000393139	NA	NA	NA	NA	1.51864	0.000193458	ortholog_one2many	70.761	71.525	50	87.19	1	ortholog
ENSDARG00000024560	ENSG00000004939	slc4a1b	SLC4A1	NA	NA	-1.95342	0.0315661	NA	NA	-2.17182	0.0246353	NA	NA	ortholog_one2many	46.7618	50.0588	0	51.71	1	ortholog
ENSDARG00000024602	ENSG00000182827	ACBD3	ACBD3	NA	NA	1.75804	0.000735641	NA	NA	NA	NA	NA	NA	ortholog_one2many	52.4621	55.9596	0	54.36	1	ortholog
ENSDARG00000024717	ENSG00000143416	selenbp1	SELENBP1	NA	NA	1.49973	0.000627405	NA	NA	NA	NA	NA	NA	ortholog_one2one	74.5763	74.4186	25	97.94	1	ortholog
ENSDARG00000024728	ENSG00000167220	hdhd2	HDHD2	0.871572	0.0469518	NA	NA	NA	NA	NA	NA	NA	NA	ortholog_one2one	75.6757	74.8092	75	98.04	1	ortholog
ENSDARG00000024759	ENSG00000122641	inhbab	INHBA	NA	NA	-0.981944	0.0061328	-1.31723	2.22563e-32	NA	NA	NA	NA	ortholog_one2many	56.338	59.2593	25	96.05	1	ortholog
ENSDARG00000024771	ENSG00000188467	slc24a5	SLC24A5	NA	NA	-1.15987	0.01935	NA	NA	NA	NA	NA	NA	ortholog_one2one	67.4	65.692	50	88.13	1	ortholog
ENSDARG00000024818	ENSG00000150977	rilpl2	RILPL2	1.41934	0.00152905	1.69304	2.71124e-06	0.71616	0.0255632	NA	NA	NA	NA	ortholog_one2one	42.1801	45.641	0	63.15	1	ortholog
ENSDARG00000024827	ENSG00000170153	rnf150a	RNF150	-1.36665	0.0122866	NA	NA	NA	NA	NA	NA	-1.57443	0.000678982	ortholog_one2many	68.4931	71.7703	100	75.27	1	ortholog
ENSDARG00000024828	ENSG00000172663	tmem134	TMEM134	1.46101	0.000189866	1.20456	5.47838e-05	NA	NA	NA	NA	NA	NA	ortholog_one2one	48.2051	45.6311	0	0	0	ortholog
ENSDARG00000024844	ENSG00000125952	max	MAX	0.63286	0.0340738	NA	NA	NA	NA	NA	NA	NA	NA	ortholog_one2one	83.125	83.125	50	94.46	1	ortholog
ENSDARG00000024877	ENSG00000106853	ptgr1	PTGR1	-2.65088	8.68153e-08	NA	NA	2.32111	0.0175571	-1.00328	0.0325423	NA	NA	ortholog_one2many	60.7903	60.7903	0	44.63	0	ortholog
ENSDARG00000024904	ENSG00000123473	stil	STIL	NA	NA	1.7377	0.000139519	NA	NA	NA	NA	1.97921	3.23344e-09	ortholog_one2one	32.8416	33.4917	0	37.88	0	ortholog
ENSDARG00000024964	ENSG00000132849	patj	PATJ	NA	NA	0.807656	0.000247059	NA	NA	NA	NA	NA	NA	ortholog_one2one	50.9564	50.1045	50	48.83	1	ortholog
ENSDARG00000024967	ENSG00000221829	fancg	FANCG	1.13119	0.0262752	NA	NA	NA	NA	1.05473	0.00306857	1.36513	1.65034e-05	ortholog_one2one	27.492	27.7147	50	4.78	1	ortholog
ENSDARG00000025011	ENSG00000159082	synj1	SYNJ1	-0.738914	0.0032859	NA	NA	NA	NA	-2.00197	2.34349e-05	-2.79871	4.57009e-31	ortholog_one2one	70.7094	70.8716	0	75.93	1	ortholog
ENSDARG00000025032	ENSG00000113580	nr3c1	NR3C1	-0.715198	0.00407152	NA	NA	NA	NA	NA	NA	NA	NA	ortholog_one2one	46.8468	48.7936	50	36.49	1	ortholog
ENSDARG00000025043	ENSG00000071539	trip13	TRIP13	NA	NA	4.3194	9.03577e-09	2.06638	0.0432258	NA	NA	1.96041	2.39338e-07	ortholog_one2one	65.0463	66.2736	75	84.53	1	ortholog
ENSDARG00000025073	ENSG00000105640	rpl18a	RPL18A	1.58457	3.27889e-07	1.23863	2.37449e-06	NA	NA	1.53248	0.00130804	2.30453	1.61915e-08	ortholog_one2one	90.9091	90.9091	0	96.69	1	ortholog
ENSDARG00000025076	ENSG00000152939	marveld2a	MARVELD2	1.62471	0.0169116	1.36733	0.000197312	NA	NA	NA	NA	NA	NA	ortholog_one2many	53.9427	55.2294	25	69.33	1	ortholog
ENSDARG00000025094	ENSG00000134109	edem1	EDEM1	0.714405	0.00139496	NA	NA	NA	NA	NA	NA	NA	NA	ortholog_one2one	69.102	72.293	25	86	1	ortholog
ENSDARG00000025162	ENSG00000072182	asic4a	ASIC4	NA	NA	-0.631484	0.00101458	NA	NA	2.82227	0.00148471	NA	NA	ortholog_one2many	61.41	61.41	0	71.96	1	ortholog
ENSDARG00000025187	ENSG00000184302	six6a	SIX6	6.46605	0.0416888	NA	NA	NA	NA	6.02499	0.0319081	7.97666	8.91537e-07	ortholog_one2many	76.8293	77.1429	100	100	1	ortholog
ENSDARG00000025206	ENSG00000143858	syt2a	SYT2	-3.43538	0.000990854	-0.876864	1.02386e-05	-0.586089	1.31777e-14	NA	NA	-2.57051	9.79938e-05	ortholog_one2many	71.8377	70	0	97.12	1	ortholog
ENSDARG00000025299	ENSG00000011105	tspan9a	TSPAN9	-1.78932	0.000918649	NA	NA	NA	NA	NA	NA	NA	NA	ortholog_one2many	76.1506	54.1667	0	100	1	ortholog
ENSDARG00000025301	ENSG00000131095	gfap	GFAP	3.00743	8.09876e-25	2.11789	7.85876e-13	NA	NA	1.77577	0.0232721	NA	NA	ortholog_one2one	66.8981	65.0901	0	86.33	1	ortholog
ENSDARG00000025325	ENSG00000154429	ccsapa	CCSAP	-1.92478	0.00951783	NA	NA	NA	NA	-1.4521	1.63495e-05	-1.70427	2.60463e-08	ortholog_one2many	27.7778	26.9784	75	0	1	ortholog
ENSDARG00000025346	ENSG00000198839	znf277	ZNF277	0.992485	0.0178985	NA	NA	NA	NA	NA	NA	NA	NA	ortholog_one2one	60.8889	62.2727	100	88.7	1	ortholog
ENSDARG00000025404	ENSG00000184787	ube2g2	UBE2G2	0.709482	0.0082651	NA	NA	NA	NA	NA	NA	NA	NA	ortholog_one2one	82.4242	82.4242	25	91.49	1	ortholog
ENSDARG00000025428	ENSG00000184557	socs3a	SOCS3	2.27883	0.000124815	1.19903	0.00109895	NA	NA	NA	NA	NA	NA	ortholog_one2many	54.6667	59.4203	50	95.75	1	ortholog
ENSDARG00000025436	ENSG00000198736	msrb1a	MSRB1	2.20381	0.0221609	NA	NA	NA	NA	0.78015	0.00221002	1.19018	0.000100442	ortholog_one2many	72.4138	76.3636	0	76.48	1	ortholog
ENSDARG00000025468	ENSG00000104765	bnip3la	BNIP3L	-2.07018	0.00244839	NA	NA	NA	NA	NA	NA	NA	NA	ortholog_one2many	65.2968	61.3734	50	63.06	1	ortholog
ENSDARG00000025535	ENSG00000113282	clint1a	CLINT1	0.726016	0.0103442	NA	NA	NA	NA	NA	NA	NA	NA	ortholog_one2many	54.88	54.1864	75	91.35	1	ortholog
ENSDARG00000025549	ENSG00000137806	ndufaf1	NDUFAF1	0.736893	0.0434357	NA	NA	NA	NA	NA	NA	NA	NA	ortholog_one2one	47.7064	51.3158	75	69.6	1	ortholog
ENSDARG00000025555	ENSG00000172057	ormdl3	ORMDL3	-2.23623	0.00171761	-0.689286	0.000554037	-0.820468	4.20019e-07	NA	NA	NA	NA	ortholog_one2one	92.1569	92.1569	0	100	1	ortholog
ENSDARG00000025566	ENSG00000075415	slc25a3b	SLC25A3	0.866997	0.000215222	NA	NA	NA	NA	NA	NA	NA	NA	ortholog_one2many	80.3324	81.4607	0	86.78	1	ortholog
ENSDARG00000025581	ENSG00000147403	rpl10	RPL10	1.74233	2.29598e-07	0.970562	8.08931e-05	NA	NA	1.53266	1.20862e-05	1.7274	9.85849e-09	ortholog_one2many	92.0561	91.6279	25	97.71	1	ortholog
ENSDARG00000025595	ENSG00000187546	agmo	AGMO	-0.78199	0.043903	NA	NA	NA	NA	2.84599	0.00113541	3.28408	7.97924e-07	ortholog_one2one	57.9775	56.3319	100	58.15	1	ortholog
ENSDARG00000025615	ENSG00000176532	prr15la	PRR15	NA	NA	-0.618759	0.0436645	NA	NA	NA	NA	NA	NA	ortholog_one2many	24.8062	29.0909	0	0	0	ortholog
ENSDARG00000025641	ENSG00000074047	gli2a	GLI2	0.989351	0.0465486	1.6899	2.14347e-09	0.843431	0.000283828	1.47915	0.0240325	2.23159	9.60892e-05	ortholog_one2one	53.1549	57.9569	0	85.09	1	ortholog
ENSDARG00000025672	ENSG00000169604	antxr1a	ANTXR1	NA	NA	NA	NA	2.44771	0.0103518	2.23415	8.05356e-11	1.78633	8.86495e-10	ortholog_one2many	63.1206	72.5051	25	72.54	1	ortholog
ENSDARG00000025679	ENSG00000093010	comtb	COMT	-1.03116	0.0368536	NA	NA	NA	NA	0.973679	0.000284353	0.605698	0.0451066	ortholog_one2many	49.8155	51.1364	0	76.34	1	ortholog
ENSDARG00000025766	ENSG00000178498	DTX3	DTX3	-0.824928	0.00626106	-0.632738	8.22366e-06	NA	NA	NA	NA	NA	NA	ortholog_one2one	42.6513	38.5417	0	50.22	1	ortholog
ENSDARG00000025797	ENSG00000140526	abhd2a	ABHD2	NA	NA	NA	NA	-0.655378	1.88835e-19	NA	NA	NA	NA	ortholog_one2many	76	74.7685	25	90.77	1	ortholog
ENSDARG00000025820	ENSG00000183765	chek2	CHEK2	1.73156	0.0124569	1.08244	0.00301767	NA	NA	1.46814	0.00919924	2.55667	2.75351e-15	ortholog_one2one	48.0663	51.8887	25	44.62	0	ortholog
ENSDARG00000025826	ENSG00000146535	gna12a	GNA12	1.28537	0.00494993	1.29078	0.000212586	NA	NA	0.888847	0.00320775	0.894984	0.000745495	ortholog_one2many	84.7769	83.8961	50	100	1	ortholog
ENSDARG00000025850	ENSG00000171858	rps21	RPS21	1.69941	7.69782e-06	0.706549	0.00161531	NA	NA	NA	NA	1.33351	0.00158902	ortholog_one2one	87.9518	90.1235	0	98.07	1	ortholog
ENSDARG00000025875	ENSG00000180901	kctd2	KCTD2	-1.80539	0.0038095	NA	NA	NA	NA	-0.666428	0.00317282	-1.19386	3.07721e-08	ortholog_one2one	73.7643	72.6592	25	86.4	1	ortholog
ENSDARG00000025889	ENSG00000101557	usp14	USP14	0.621717	0.00260137	NA	NA	NA	NA	-1.03377	2.61769e-06	-0.857061	5.22305e-07	ortholog_one2one	80.7692	81.5951	25	95.34	1	ortholog
ENSDARG00000025920	ENSG00000156299	tiam1b	TIAM1	-2.112	0.000123396	NA	NA	NA	NA	-0.774389	0.0417352	-1.55149	3.66565e-07	ortholog_one2many	60.8422	61.2658	75	71.5	1	ortholog
ENSDARG00000025949	ENSG00000184216	irak1	IRAK1	NA	NA	1.27746	0.000200503	0.658485	0.0263071	0.652522	0.0228836	0.990611	9.18211e-06	ortholog_one2one	37.9213	39.3586	25	28.01	0	ortholog
ENSDARG00000025972	ENSG00000232119	mcts1	MCTS1	1.2893	3.63259e-05	NA	NA	NA	NA	NA	NA	NA	NA	ortholog_one2many	94.4751	94.4751	50	98.02	1	ortholog
ENSDARG00000025974	ENSG00000081026	magi3b	MAGI3	-1.76431	1.49672e-07	-0.612312	0.00226282	NA	NA	NA	NA	-1.10061	0.00023859	ortholog_one2many	47.3329	62.9264	25	64.89	1	ortholog
ENSDARG00000025977	ENSG00000108578	blmh	BLMH	0.956532	0.00171117	NA	NA	NA	NA	0.695513	0.00418248	0.646094	0.000538548	ortholog_one2one	70.3297	70.6402	50	97.01	1	ortholog
ENSDARG00000025983	ENSG00000198945	l3mbtl3	L3MBTL3	-2.06193	0.000476644	NA	NA	NA	NA	NA	NA	-0.644307	0.047394	ortholog_one2one	53.5897	57.7348	100	47.7	1	ortholog
ENSDARG00000026024	ENSG00000130150	mospd2	MOSPD2	NA	NA	0.940784	0.0100356	NA	NA	NA	NA	NA	NA	ortholog_one2one	60.2317	59.3156	50	62.02	1	ortholog
ENSDARG00000026028	ENSG00000065413	ankrd44	ANKRD44	-1.11963	0.0154263	NA	NA	NA	NA	0.881265	0.00605896	NA	NA	ortholog_one2one	69.8892	64.9813	50	32.99	1	ortholog
ENSDARG00000026052	ENSG00000151468	ccdc3a	CCDC3	NA	NA	NA	NA	0.979881	0.0486688	-2.46303	0.00126746	-1.46564	0.000756437	ortholog_one2many	63.3333	61.9565	75	93.7	1	ortholog
ENSDARG00000026070	ENSG00000085117	cd82b	CD82	3.31351	4.18797e-05	2.01669	8.2756e-07	0.955707	0.000130741	1.28344	0.00177946	NA	NA	ortholog_one2many	51.3109	53.5156	25	56.48	1	ortholog
ENSDARG00000026090	ENSG00000170222	adprm	ADPRM	0.912994	0.0403224	0.793237	0.00175477	NA	NA	0.659142	0.010545	0.734759	0.0071549	ortholog_one2one	48.8304	51.8634	50	88.97	1	ortholog
ENSDARG00000026183	ENSG00000099817	polr2eb	POLR2E	1.43626	2.09511e-07	NA	NA	NA	NA	NA	NA	NA	NA	ortholog_one2many	91.9048	91.9048	25	99.84	1	ortholog
ENSDARG00000026224	ENSG00000140525	fanci	FANCI	NA	NA	3.23818	1.74961e-13	1.22416	0.0128586	1.8472	0.0107021	2.77217	4.72232e-13	ortholog_one2one	60.1657	60.211	50	79.49	1	ortholog
ENSDARG00000026225	ENSG00000109685	nsd2	NSD2	0.612221	0.0312643	0.690008	0.000989482	NA	NA	NA	NA	NA	NA	ortholog_one2one	45.4945	42.5051	50	42.96	1	ortholog
ENSDARG00000026294	ENSG00000141736	erbb2	ERBB2	NA	NA	0.859428	5.4277e-07	0.655676	0.00108706	NA	NA	1.3896	0.00316604	ortholog_one2one	55.6972	54.8235	0	50.64	1	ortholog
ENSDARG00000026322	ENSG00000167536	dhrs13a.1	DHRS13	0.988063	0.000968975	NA	NA	NA	NA	NA	NA	1.35817	0.000742809	ortholog_one2many	42.1751	50	50	38.76	1	ortholog
ENSDARG00000026325	ENSG00000099953	mmp11a	MMP11	NA	NA	1.45657	0.00436984	1.30877	0.0233246	NA	NA	2.50269	9.47304e-05	ortholog_one2many	52.6639	53.2091	0	64.74	1	ortholog
ENSDARG00000026335	ENSG00000143502	susd4	SUSD4	-1.05315	0.00562613	-1.24128	5.80307e-13	-1.11449	1.61284e-38	NA	NA	-1.39309	0.0109528	ortholog_one2one	51.8367	52.4793	0	84.76	1	ortholog
ENSDARG00000026348	ENSG00000139631	csad	CSAD	NA	NA	0.92423	0.00730637	1.00156	0.00223134	NA	NA	NA	NA	ortholog_one2one	62.8803	56.9853	0	70.69	1	ortholog
ENSDARG00000026350	ENSG00000015285	wasb	WAS	1.84066	0.000252836	3.07398	5.63756e-15	1.11734	0.00301962	NA	NA	1.46174	0.000961117	ortholog_one2many	50	52.4008	0	52.47	1	ortholog
ENSDARG00000026369	ENSG00000155368	dbi	DBI	1.25487	0.0071959	0.721345	0.0310142	NA	NA	1.8622	3.84724e-06	2.16103	1.96853e-07	ortholog_one2one	73.5632	73.5632	75	0	1	ortholog
ENSDARG00000026395	ENSG00000111783	rfx4	RFX4	NA	NA	1.05864	0.000126189	0.686599	0.00256485	1.48599	0.00138324	1.42832	0.0022123	ortholog_one2one	84.4898	84.4898	75	92.78	1	ortholog
ENSDARG00000026400	ENSG00000185379	rad51d	RAD51D	NA	NA	0.959406	0.00627881	NA	NA	NA	NA	NA	NA	ortholog_one2one	53.9634	54.1284	25	0	0	ortholog
ENSDARG00000026403	ENSG00000089472	hephl1b	HEPH	2.71504	0.00492473	NA	NA	NA	NA	NA	NA	NA	NA	ortholog_one2one	47.323	50.3214	0	52.57	1	ortholog
ENSDARG00000026454	ENSG00000167842	mis12	MIS12	2.56876	0.0140419	3.08229	4.22725e-06	1.6399	0.0173243	0.86195	3.34918e-06	0.985879	3.61879e-05	ortholog_one2one	35.6098	33.9535	0	66.53	1	ortholog
ENSDARG00000026482	ENSG00000165322	arhgap12b	ARHGAP12	-0.62113	0.00464161	NA	NA	NA	NA	1.16183	0.000252715	NA	NA	ortholog_one2many	61.9385	64.1371	50	77.81	1	ortholog
ENSDARG00000026499	ENSG00000175175	ppm1e	PPM1E	-2.10695	0.0332384	NA	NA	NA	NA	-1.32191	0.00443919	-1.93808	9.78172e-06	ortholog_one2one	45.1656	53.8705	25	67.14	1	ortholog
ENSDARG00000026548	ENSG00000155016	cyp2u1	CYP2U1	-1.38178	0.0358334	NA	NA	NA	NA	1.20498	0.000243941	0.985939	0.000312273	ortholog_one2one	52.5735	53.6585	75	90.4	1	ortholog
ENSDARG00000026611	ENSG00000184557	socs3b	SOCS3	4.52516	1.13504e-21	2.60444	9.28554e-09	NA	NA	NA	NA	NA	NA	ortholog_one2many	57.3333	61.4286	100	99.85	1	ortholog
ENSDARG00000026726	ENSG00000135046	anxa1a	ANXA1	4.16017	1.75221e-08	3.70901	4.20771e-09	NA	NA	NA	NA	4.04318	8.34894e-15	ortholog_one2many	63.5838	64.7059	100	90.68	1	ortholog
ENSDARG00000026753	ENSG00000149403	grik4	GRIK4	1.17667	0.0297037	NA	NA	NA	NA	NA	NA	-0.90184	0.0328751	ortholog_one2one	79.6025	78.8601	50	91.58	1	ortholog
ENSDARG00000026766	ENSG00000137875	bcl2l10	BCL2L10	0.822438	0.0394047	NA	NA	NA	NA	-2.93294	0.000252399	-2.88376	1.26314e-07	ortholog_one2one	22.549	26.1364	25	0	0	ortholog
ENSDARG00000026787	ENSG00000165269	aqp7	AQP7	4.86863	0.000815946	3.09231	4.78078e-06	NA	NA	-2.10855	0.00295596	-4.01377	5.19642e-09	ortholog_one2many	42.1053	42.8571	0	42.69	0	ortholog
ENSDARG00000026796	ENSG00000152822	grm1a	GRM1	NA	NA	-0.627056	0.0156417	NA	NA	-2.93084	0.000732412	-4.52087	1.52082e-09	ortholog_one2many	67.0854	69.4709	50	96.51	1	ortholog
ENSDARG00000026811	ENSG00000012232	extl3	EXTL3	-1.62847	0.0139478	NA	NA	NA	NA	-0.671153	0.0178283	NA	NA	ortholog_one2one	81.7193	81.8975	25	99.88	1	ortholog
ENSDARG00000026829	ENSG00000103187	cotl1	COTL1	2.3937	5.7619e-17	1.21842	1.06704e-05	NA	NA	NA	NA	1.41877	2.04176e-06	ortholog_one2one	68.3099	68.3099	25	100	1	ortholog
ENSDARG00000026839	ENSG00000152944	med21	MED21	0.813921	0.0246782	NA	NA	NA	NA	NA	NA	NA	NA	ortholog_one2one	86.1111	85.5172	50	100	1	ortholog
ENSDARG00000026865	ENSG00000065809	fam107b	FAM107B	NA	NA	-0.783491	0.00723863	-1.43961	0.000233679	NA	NA	-2.19644	8.46403e-08	ortholog_one2one	35.9477	66.6667	0	59.4	1	ortholog
ENSDARG00000026907	ENSG00000211584	slc48a1a	SLC48A1	-1.69951	0.014986	NA	NA	NA	NA	NA	NA	-1.68565	2.32676e-08	ortholog_one2many	58.9041	59.7222	25	61.45	1	ortholog
ENSDARG00000026908	ENSG00000086598	tmed2	TMED2	1.14288	2.10191e-05	NA	NA	NA	NA	NA	NA	0.806867	0.00226037	ortholog_one2one	87.0647	84.1346	25	98.34	1	ortholog
ENSDARG00000026988	ENSG00000065491	tbc1d22b	TBC1D22B	-2.117	0.00020182	NA	NA	NA	NA	-0.601334	0.00161614	NA	NA	ortholog_one2one	69.703	76.6885	0	86.88	1	ortholog
ENSDARG00000027017	ENSG00000066027	ppp2r5a	PPP2R5A	-1.26277	0.0379998	-0.648607	0.00257919	NA	NA	1.21173	0.010415	NA	NA	ortholog_one2one	79.2181	80.7128	50	67.83	1	ortholog
ENSDARG00000027063	ENSG00000130429	arpc1b	ARPC1B	4.15482	2.67942e-24	3.69826	1.1559e-19	1.06617	3.81275e-10	NA	NA	1.86248	1.87726e-05	ortholog_one2one	80.3763	81.0298	0	96.54	1	ortholog
ENSDARG00000027079	ENSG00000170396	znf804a	ZNF804A	-1.71439	0.00797498	NA	NA	NA	NA	NA	NA	NA	NA	ortholog_one2one	27.1299	28.9753	75	24.59	1	ortholog
ENSDARG00000027087	ENSG00000092969	tgfb2	TGFB2	NA	NA	1.58884	1.444e-05	NA	NA	NA	NA	1.28082	0.0207398	ortholog_one2one	79.4686	79.661	25	94.99	1	ortholog
ENSDARG00000027099	ENSG00000013275	psmc4	PSMC4	0.634674	0.000154629	NA	NA	NA	NA	NA	NA	NA	NA	ortholog_one2one	96.6507	96.6507	0	97.02	1	ortholog
ENSDARG00000027112	ENSG00000196411	ephb4b	EPHB4	NA	NA	1.35253	0.00487278	1.07423	8.26292e-05	1.44528	0.00240759	2.45503	2.12087e-07	ortholog_one2one	59.1692	59.8361	0	28.34	0	ortholog
ENSDARG00000027154	ENSG00000101150	tpd52l2a	TPD52L2	0.760282	0.0355992	NA	NA	NA	NA	NA	NA	NA	NA	ortholog_one2many	44.1748	45.7286	25	33.86	0	ortholog
ENSDARG00000027316	ENSG00000166046	tcp11l2	TCP11L2	NA	NA	-0.806914	1.54977e-09	-1.01685	1.31237e-24	NA	NA	NA	NA	ortholog_one2one	52.6012	51.6068	0	91.86	1	ortholog
ENSDARG00000027345	ENSG00000149573	mpzl2b	MPZL2	3.593	1.2907e-17	3.22432	6.19147e-09	0.732622	0.0305239	NA	NA	1.75178	0.000575439	ortholog_one2one	35.3488	38.191	0	48.24	0	ortholog
ENSDARG00000027397	ENSG00000162738	vangl2	VANGL2	NA	NA	0.858596	2.53799e-10	0.635875	8.19055e-10	2.67909	1.6398e-16	1.77354	1.61011e-07	ortholog_one2one	77.5432	76.8061	0	100	1	ortholog
ENSDARG00000027419	ENSG00000128683	gad1b	GAD1	-1.0721	0.0403809	NA	NA	NA	NA	-1.86328	0.0174226	-3.29077	1.07733e-06	ortholog_one2many	82.6599	80.0979	50	95.71	1	ortholog
ENSDARG00000027423	ENSG00000140443	igf1ra	IGF1R	-1.40525	0.0113745	NA	NA	NA	NA	NA	NA	NA	NA	ortholog_one2many	67.3738	65.5516	50	64.96	1	ortholog
ENSDARG00000027428	ENSG00000148688	rpp30	RPP30	1.08495	0.0493497	NA	NA	NA	NA	NA	NA	NA	NA	ortholog_one2one	60.0746	60.7547	50	55.5	1	ortholog
ENSDARG00000027497	ENSG00000105613	mast1a	MAST1	-2.11436	0.00257899	NA	NA	NA	NA	-1.69794	0.00597452	-2.79242	1.82007e-06	ortholog_one2many	69.7452	63.774	0	65.42	1	ortholog
ENSDARG00000027501	ENSG00000136878	usp20	USP20	-0.62668	0.0065999	NA	NA	NA	NA	NA	NA	-1.21217	5.572e-07	ortholog_one2one	75.6018	75.8507	0	93.75	1	ortholog
ENSDARG00000027523	ENSG00000069018	trpc7a	TRPC7	NA	NA	-0.771028	0.00820364	NA	NA	NA	NA	NA	NA	ortholog_one2many	81.0905	83.0166	0	73.31	1	ortholog
ENSDARG00000027529	ENSG00000100292	hmox1a	HMOX1	4.23985	8.86064e-10	5.0372	2.14672e-29	2.25944	5.99392e-13	NA	NA	2.55639	1.44507e-05	ortholog_one2one	44.0972	46.6912	0	58.66	1	ortholog
ENSDARG00000027552	ENSG00000100030	mapk1	MAPK1	-2.25642	0.00465116	NA	NA	NA	NA	-1.18393	2.30147e-05	-1.49987	5.67963e-11	ortholog_one2one	92.5	90.2439	100	60.24	1	ortholog
ENSDARG00000027564	ENSG00000137843	pak6a	PAK6	-2.2481	0.0015198	NA	NA	NA	NA	-3.3822	0.00119849	-4.38236	3.47155e-17	ortholog_one2many	51.1013	50.2164	75	59.74	1	ortholog
ENSDARG00000027589	ENSG00000155760	fzd7b	FZD7	0.958133	0.032995	1.57608	0.00100071	0.795701	0.00851479	NA	NA	2.81412	3.69286e-08	ortholog_one2many	77.7003	80.0718	100	94.5	1	ortholog
ENSDARG00000027590	ENSG00000168385	sept2	SEPTIN2	0.732138	0.00918951	0.710771	0.0165315	NA	NA	1.51244	8.05356e-11	1.11639	1.87912e-08	ortholog_one2one	87.2576	78.5536	50	85.58	1	ortholog
ENSDARG00000027602	ENSG00000128011	lrfn1	LRFN1	-1.52493	0.0226576	NA	NA	NA	NA	-1.30126	0.00114526	-1.38742	0.000182665	ortholog_one2one	45.3956	59.9315	0	85.11	1	ortholog
ENSDARG00000027689	ENSG00000062822	pold1	POLD1	0.785856	0.0044666	1.4754	5.11106e-07	NA	NA	1.1993	0.0087812	1.39955	2.72802e-05	ortholog_one2one	69.3767	69.5023	0	80.76	1	ortholog
ENSDARG00000027724	ENSG00000136267	dgkb	DGKB	-1.65701	0.00139504	NA	NA	NA	NA	-1.55124	0.025003	-2.70769	1.401e-05	ortholog_one2one	70.2366	73.1517	100	57.41	1	ortholog
ENSDARG00000027744	ENSG00000099860	gadd45ba	GADD45B	NA	NA	NA	NA	-0.605569	0.0115242	NA	NA	NA	NA	ortholog_one2many	68.75	69.1824	0	100	1	ortholog
ENSDARG00000027749	ENSG00000149929	hirip3	HIRIP3	0.983911	0.0300551	NA	NA	NA	NA	0.939984	0.000992615	NA	NA	ortholog_one2one	24.2806	26.4188	0	17.47	0	ortholog
ENSDARG00000027750	ENSG00000176978	dpp7	DPP7	1.24928	0.000199015	1.31353	0.00062063	NA	NA	NA	NA	NA	NA	ortholog_one2one	53.8618	53	25	75.53	1	ortholog
ENSDARG00000027825	ENSG00000121579	naa50	NAA50	0.970644	0.000933003	NA	NA	NA	NA	NA	NA	NA	NA	ortholog_one2one	92.3077	92.3077	100	97.56	1	ortholog
ENSDARG00000027903	ENSG00000156218	adamtsl3	ADAMTSL3	-2.66387	4.45202e-07	-0.633261	7.04297e-08	NA	NA	NA	NA	-1.5923	0.00386735	ortholog_one2one	50.6801	48.6932	25	52.58	1	ortholog
ENSDARG00000027916	ENSG00000257365	fntb	FNTB	0.770642	0.0365342	NA	NA	NA	NA	0.871295	0.0184707	NA	NA	ortholog_one2many	67.5057	70.4057	25	82.12	1	ortholog
ENSDARG00000027930	ENSG00000147813	naprt	NAPRT	1.63848	6.48112e-06	1.09647	0.00940964	0.702077	0.0167287	NA	NA	NA	NA	ortholog_one2one	55.3903	54.3796	0	72.22	1	ortholog
ENSDARG00000027933	ENSG00000174332	glis1b	GLIS1	1.11445	0.0458397	NA	NA	NA	NA	NA	NA	NA	NA	ortholog_one2one	32.0755	33.8645	0	30.28	0	ortholog
ENSDARG00000027963	ENSG00000164076	camkva	CAMKV	-1.69533	0.0198251	NA	NA	NA	NA	-3.27066	0.00154851	-4.55813	1.48765e-08	ortholog_one2many	61.2774	75.0611	25	79.9	1	ortholog
ENSDARG00000027966	ENSG00000152056	ap1s3b	AP1S3	3.14004	8.9625e-05	NA	NA	NA	NA	-1.67845	0.00658818	NA	NA	ortholog_one2many	74.6753	74.6753	25	7.85	0	ortholog
ENSDARG00000027986	ENSG00000116704	slc35d1b	SLC35D1	1.72817	0.00395824	NA	NA	NA	NA	NA	NA	0.72918	0.0157387	ortholog_one2many	65.9155	70.4819	25	86.13	1	ortholog
ENSDARG00000027992	ENSG00000116882	hao2	HAO2	NA	NA	2.24171	0.0173063	NA	NA	NA	NA	NA	NA	ortholog_one2one	61.2536	60.2241	75	91.24	1	ortholog
ENSDARG00000028048	ENSG00000080511	rdh8a	RDH8	-1.57977	0.0215585	NA	NA	NA	NA	NA	NA	NA	NA	ortholog_one2many	54.3408	53.1447	25	90.6	1	ortholog
ENSDARG00000028058	ENSG00000175104	traf6	TRAF6	NA	NA	0.958203	0.000360072	NA	NA	NA	NA	NA	NA	ortholog_one2one	57.2797	55.166	0	69.91	1	ortholog
ENSDARG00000028066	ENSG00000176490	diras1a	DIRAS1	NA	NA	-0.587725	0.000166271	NA	NA	-2.07407	0.000581319	-2.10696	1.57436e-07	ortholog_one2many	78.7879	80	0	100	1	ortholog
ENSDARG00000028088	ENSG00000108479	galk1	GALK1	2.0859	0.000284803	1.76129	7.69794e-07	NA	NA	1.62155	0.000128441	1.64891	1.57436e-07	ortholog_one2one	64.2857	64.1221	0	89.59	1	ortholog
ENSDARG00000028099	ENSG00000095370	sh2d3ca	SH2D3C	-1.35094	0.0327697	NA	NA	NA	NA	-1.7207	3.27381e-05	-1.46614	3.89461e-06	ortholog_one2one	46.9767	59.587	0	69.44	1	ortholog
ENSDARG00000028106	ENSG00000173221	glrx	GLRX	4.18935	6.79143e-08	2.05037	5.53305e-05	NA	NA	NA	NA	1.02592	0.0240645	ortholog_one2one	50	50.4762	75	0	1	ortholog
ENSDARG00000028173	ENSG00000164889	slc4a2a	SLC4A2	1.93716	0.000184477	NA	NA	NA	NA	1.60356	0.000172923	1.18584	0.000925287	ortholog_one2many	62.2885	62.9479	0	74.04	1	ortholog
ENSDARG00000028201	ENSG00000169019	commd8	COMMD8	0.888055	0.0226397	NA	NA	NA	NA	NA	NA	NA	NA	ortholog_one2one	44.2623	46.0227	25	0	0	ortholog
ENSDARG00000028222	ENSG00000105855	itgb8	ITGB8	-1.64033	0.00390577	NA	NA	NA	NA	1.31223	0.0205696	1.27777	0.00481722	ortholog_one2one	37.1912	42.8144	50	38.56	1	ortholog
ENSDARG00000028306	ENSG00000135406	prph	PRPH	NA	NA	2.23186	1.53457e-08	1.50703	0.00312523	2.62234	0.000458157	3.4494	2.08152e-09	ortholog_one2one	57.6596	61.3122	0	66.45	1	ortholog
ENSDARG00000028346	ENSG00000088992	tesca	TESC	NA	NA	1.49167	0.0228535	NA	NA	-1.55717	0.0199921	-1.53908	0.00211819	ortholog_one2many	31.7757	31.1927	75	43.03	1	ortholog
ENSDARG00000028354	ENSG00000168952	stxbp6l	STXBP6	NA	NA	-1.06535	7.99977e-06	NA	NA	-2.01908	0.00623324	-3.82301	2.97515e-09	ortholog_one2many	34.7619	26.259	0	36.2	0	ortholog
ENSDARG00000028389	ENSG00000255587	rab44	RAB44	3.10566	6.10325e-06	1.56842	0.000153817	NA	NA	NA	NA	NA	NA	ortholog_one2one	17.1401	8.96516	25	0	0	ortholog
ENSDARG00000028393	ENSG00000146122	daam2	DAAM2	-2.0987	5.52938e-05	NA	NA	NA	NA	NA	NA	-1.63663	0.0331197	ortholog_one2one	71.6292	70.2479	50	87.33	1	ortholog
ENSDARG00000028396	ENSG00000096060	fkbp5	FKBP5	NA	NA	-1.32242	0.00123766	NA	NA	NA	NA	1.55825	0.00503443	ortholog_one2one	58.2057	58.7196	0	68.38	1	ortholog
ENSDARG00000028442	ENSG00000132881	cplane2	CPLANE2	1.18352	0.00224686	NA	NA	NA	NA	NA	NA	-0.804384	0.00896244	ortholog_one2one	50.7752	51.9841	0	95.53	1	ortholog
ENSDARG00000028469	ENSG00000071242	rps6ka2	RPS6KA2	-1.49058	0.0321957	-0.642217	0.00873391	NA	NA	-0.949363	0.0157379	-1.72278	2.12125e-06	ortholog_one2one	88.6767	88.6767	25	52.51	1	ortholog
ENSDARG00000028507	ENSG00000132470	itgb4	ITGB4	0.894279	0.044229	1.24837	3.50935e-10	0.74678	0.000321953	NA	NA	NA	NA	ortholog_one2one	53.1284	51.1358	0	61.46	1	ortholog
ENSDARG00000028523	ENSG00000148153	inip	INIP	1.03714	0.0239451	NA	NA	NA	NA	NA	NA	NA	NA	ortholog_one2one	79.8077	80.5825	50	89.52	1	ortholog
ENSDARG00000028583	ENSG00000141526	SLC16A3	SLC16A3	-1.31729	0.0349509	NA	NA	-0.593522	0.0103355	NA	NA	2.01804	6.99528e-05	ortholog_one2many	70.1075	65.0699	25	88.61	1	ortholog
ENSDARG00000028586	ENSG00000181619	gpr135	GPR135	-1.52744	0.00585103	NA	NA	NA	NA	NA	NA	NA	NA	ortholog_one2one	48.1781	56.1321	25	88.61	1	ortholog
ENSDARG00000028628	ENSG00000124194	gdap1l1	GDAP1L1	-1.02929	0.00216734	NA	NA	NA	NA	NA	NA	-1.78421	0.0209821	ortholog_one2one	78.7466	78.7466	25	99.86	1	ortholog
ENSDARG00000028664	ENSG00000100591	ahsa1a	AHSA1	NA	NA	-4.13844	0.000262956	NA	NA	NA	NA	-0.657347	0.000530496	ortholog_one2many	52.071	55.6962	0	71.36	1	ortholog
ENSDARG00000028725	ENSG00000120907	adra1aa	ADRA1A	NA	NA	-0.772967	0.0194634	NA	NA	NA	NA	-1.63834	0.0486064	ortholog_one2one	58.7983	56.4948	50	70.71	1	ortholog
ENSDARG00000028731	ENSG00000138378	stat4	STAT4	NA	NA	2.12147	1.11302e-11	NA	NA	-2.59198	0.0282837	-3.27618	1.00053e-08	ortholog_one2one	60.5615	61.1336	50	52.02	1	ortholog
ENSDARG00000028786	ENSG00000136213	chst12a	CHST12	-1.54522	0.00626619	NA	NA	NA	NA	NA	NA	NA	NA	ortholog_one2many	59.4203	56.422	50	99.01	1	ortholog
ENSDARG00000028793	ENSG00000087095	nlk2	NLK	-2.10289	0.00332272	NA	NA	NA	NA	-1.51288	6.16568e-05	-1.9519	1.80433e-15	ortholog_one2one	94.4972	93.4334	0	100	1	ortholog
ENSDARG00000028800	ENSG00000105443	CYTH2	CYTH2	-1.91989	0.0109306	NA	NA	NA	NA	NA	NA	NA	NA	ortholog_one2many	87.7193	83.9329	0	96.58	1	ortholog
ENSDARG00000028816	ENSG00000166557	tmed3	TMED3	1.56454	1.73275e-05	1.35905	7.8284e-06	NA	NA	NA	NA	0.875016	0.00482005	ortholog_one2one	58.0645	61.165	0	85.28	1	ortholog
ENSDARG00000028848	ENSG00000161654	lsm12a	LSM12	0.81758	0.0296853	NA	NA	NA	NA	NA	NA	1.00313	7.43272e-11	ortholog_one2many	68.2051	67.8571	25	61.73	1	ortholog
ENSDARG00000028857	ENSG00000167037	sgsm1a	SGSM1	-1.5622	0.0184067	NA	NA	NA	NA	-1.90304	0.00661076	-4.08577	4.60875e-12	ortholog_one2many	71.4547	72.5163	0	71.75	1	ortholog
ENSDARG00000028889	ENSG00000140990	ndufb10	NDUFB10	0.907541	0.0130154	NA	NA	NA	NA	NA	NA	NA	NA	ortholog_one2one	54.0698	54.7059	25	61.37	1	ortholog
ENSDARG00000028949	ENSG00000171448	ZBTB26	ZBTB26	-0.713471	0.0104734	NA	NA	NA	NA	1.19267	2.15581e-05	NA	NA	ortholog_one2one	54.195	58.1509	0	83.29	1	ortholog
ENSDARG00000028971	ENSG00000165934	cpsf2	CPSF2	0.66899	0.004146	NA	NA	NA	NA	0.705594	0.00310074	NA	NA	ortholog_one2one	85.9335	85.0633	25	100	1	ortholog
ENSDARG00000029036	ENSG00000118508	rab32a	RAB32	2.62592	4.82003e-05	1.58808	0.000989224	NA	NA	NA	NA	2.59958	3.28161e-08	ortholog_one2many	74.6667	78.8732	75	92.82	1	ortholog
ENSDARG00000029039	ENSG00000184307	zdhhc23a	ZDHHC23	NA	NA	-2.01648	0.0234461	NA	NA	-2.59442	0.0130622	-1.56683	0.0115717	ortholog_one2many	47.3563	51.1166	25	65.27	1	ortholog
ENSDARG00000029063	ENSG00000166855	clpxa	CLPX	-0.868114	0.00226725	NA	NA	NA	NA	NA	NA	NA	NA	ortholog_one2many	78.357	79.4872	50	92.64	1	ortholog
ENSDARG00000029064	ENSG00000164405	uqcrq	UQCRQ	1.28426	4.43209e-05	NA	NA	NA	NA	NA	NA	0.906015	0.0182537	ortholog_one2one	53.6585	53.6585	0	94.41	1	ortholog
ENSDARG00000029071	ENSG00000184164	creld2	CRELD2	2.13064	7.61729e-09	0.800726	0.00264411	NA	NA	NA	NA	NA	NA	ortholog_one2one	49.2918	51.0264	50	19.93	1	ortholog
ENSDARG00000029075	ENSG00000114268	pfkfb4b	PFKFB4	NA	NA	-0.881777	0.00129597	-1.07487	7.55445e-06	0.681847	0.0248138	1.27561	0.0015324	ortholog_one2many	82.7292	76.9841	0	68.14	1	ortholog
ENSDARG00000029088	ENSG00000151806	guf1	GUF1	0.678496	0.00463825	NA	NA	NA	NA	NA	NA	NA	NA	ortholog_one2one	73.3931	73.0655	25	89.13	1	ortholog
ENSDARG00000029100	ENSG00000172586	chchd1	CHCHD1	1.10405	0.000874582	NA	NA	NA	NA	NA	NA	NA	NA	ortholog_one2one	39.8305	41.5929	25	32.57	0	ortholog
ENSDARG00000029107	ENSG00000072401	ube2d1a	UBE2D1	1.10109	0.00470178	NA	NA	NA	NA	NA	NA	NA	NA	ortholog_one2many	82.9932	82.9932	0	94.31	1	ortholog
ENSDARG00000029124	ENSG00000166106	adamts15a	ADAMTS15	NA	NA	1.13798	0.031295	NA	NA	2.52746	0.0108105	2.77081	9.20379e-06	ortholog_one2many	62.1053	61.5866	75	92.45	1	ortholog
ENSDARG00000029234	ENSG00000164506	stxbp5b	STXBP5	-1.57875	0.0151345	NA	NA	NA	NA	-2.2939	0.000108531	-3.40211	1.99376e-20	ortholog_one2many	76.861	76.3134	100	85.16	1	ortholog
ENSDARG00000029250	ENSG00000101751	poli	POLI	-0.763102	0.0284512	NA	NA	NA	NA	NA	NA	NA	NA	ortholog_one2one	39.8649	41.5493	0	46.2	0	ortholog
ENSDARG00000029252	ENSG00000138385	ssb	SSB	0.758954	8.31176e-05	NA	NA	NA	NA	NA	NA	NA	NA	ortholog_one2one	55.1471	56.1097	50	62.82	1	ortholog
ENSDARG00000029291	ENSG00000151151	ipmkb	IPMK	-0.727189	2.75208e-05	NA	NA	NA	NA	NA	NA	NA	NA	ortholog_one2one	50.7212	56.7204	50	56.79	1	ortholog
ENSDARG00000029296	ENSG00000050030	nexmifb	NEXMIF	-0.877349	0.00199178	NA	NA	NA	NA	-1.58836	0.0122375	-2.57495	0.00093664	ortholog_one2many	37.2032	45.8537	75	90.61	1	ortholog
ENSDARG00000029353	ENSG00000135919	serpine2	SERPINE2	1.21682	5.68921e-05	1.12168	6.03442e-08	NA	NA	NA	NA	NA	NA	ortholog_one2one	52.3929	52.6582	50	47.16	1	ortholog
ENSDARG00000029370	ENSG00000135299	ankrd6b	ANKRD6	-1.60224	0.0316302	NA	NA	NA	NA	NA	NA	NA	NA	ortholog_one2one	51.8569	51.7857	0	58.45	1	ortholog
ENSDARG00000029372	ENSG00000105808	rasa4	RASA4	NA	NA	NA	NA	-0.632784	7.85693e-08	NA	NA	NA	NA	ortholog_one2many	61.1457	61.375	25	82.12	1	ortholog
ENSDARG00000029432	ENSG00000129167	tph1a	TPH1	-1.62882	0.037632	-1.20418	0.00138653	-1.09116	0.00582674	NA	NA	NA	NA	ortholog_one2many	78.3784	72.0497	75	81.21	1	ortholog
ENSDARG00000029445	ENSG00000114784	eif1b	EIF1B	1.19107	0.00195082	NA	NA	NA	NA	NA	NA	NA	NA	ortholog_one2one	96.4602	96.4602	0	100	1	ortholog
ENSDARG00000029463	ENSG00000153317	asap1a	ASAP1	-0.633244	0.00883421	NA	NA	NA	NA	NA	NA	NA	NA	ortholog_one2many	74.7564	74.5583	50	73.95	1	ortholog
ENSDARG00000029480	ENSG00000128487	specc1	SPECC1	-1.20961	0.00459173	NA	NA	NA	NA	NA	NA	NA	NA	ortholog_one2one	48.9362	46.6667	0	78.28	1	ortholog
ENSDARG00000029500	ENSG00000109475	rpl34	RPL34	1.47872	0.000310781	0.688492	0.0023291	NA	NA	1.02254	0.0148991	0.876582	0.0137185	ortholog_one2one	94.0171	94.0171	0	100	1	ortholog
ENSDARG00000029501	ENSG00000105723	gsk3aa	GSK3A	-0.947697	0.0296162	NA	NA	NA	NA	-1.16666	6.0601e-05	-1.06516	1.05134e-08	ortholog_many2many	72.2567	75.5411	25	70.81	1	ortholog
ENSDARG00000029533	ENSG00000063177	rpl18	RPL18	1.74069	4.14404e-07	1.06598	2.24693e-05	NA	NA	1.14156	0.0110417	1.28915	0.000261748	ortholog_one2one	82.9787	85.7143	0	99.31	1	ortholog
ENSDARG00000029569	ENSG00000023608	snapc1a	SNAPC1	NA	NA	-1.37481	0.0415199	NA	NA	0.938973	0.00545192	1.05629	0.000248569	ortholog_one2many	33.1522	34.957	50	32.51	1	ortholog
ENSDARG00000029615	ENSG00000163807	zgc:77056	KIAA1143	0.905477	0.0079295	NA	NA	NA	NA	NA	NA	NA	NA	ortholog_one2one	50	50.9934	50	94.93	1	ortholog
ENSDARG00000029663	ENSG00000174903	rab1ab	RAB1B	1.03717	1.47262e-07	NA	NA	NA	NA	NA	NA	NA	NA	ortholog_one2many	94.0299	94.0299	0	97.71	1	ortholog
ENSDARG00000029668	ENSG00000150938	crim1	CRIM1	-1.13319	0.0492054	NA	NA	NA	NA	NA	NA	-1.02157	0.0232086	ortholog_one2one	69.5946	70.2045	0	90.93	1	ortholog
ENSDARG00000029689	ENSG00000163931	tkta	TKT	NA	NA	-0.694272	0.0216148	NA	NA	NA	NA	NA	NA	ortholog_one2one	70.7865	70.2229	25	81.07	1	ortholog
ENSDARG00000029695	ENSG00000184207	pgp	PGP	NA	NA	NA	NA	-0.703335	4.08015e-07	-1.4973	6.3449e-05	-1.45764	1.72928e-11	ortholog_one2one	53.8941	56.5359	50	61.47	1	ortholog
ENSDARG00000029722	ENSG00000164104	hmgb2a	HMGB2	2.74357	2.41752e-13	2.0289	2.39556e-11	0.713402	0.000216782	1.49804	0.00143675	2.24611	6.00179e-13	ortholog_one2one	73.6842	72.3005	100	100	1	ortholog
ENSDARG00000029761	ENSG00000105926	mpp6b	MPP6	-1.51407	0.00100218	NA	NA	NA	NA	NA	NA	-0.864121	0.0360844	ortholog_one2many	75.3704	75.5102	100	45	1	ortholog
ENSDARG00000029766	ENSG00000144852	nr1i2	NR1I2	-1.61287	0.00793751	NA	NA	NA	NA	NA	NA	NA	NA	ortholog_one2one	45.8525	46.2791	50	65.65	1	ortholog
ENSDARG00000029856	ENSG00000117519	cnn3b	CNN3	NA	NA	1.38304	1.56623e-06	NA	NA	1.17159	0.0173329	2.25293	3.61658e-13	ortholog_one2many	81.459	80.9668	25	100	1	ortholog
ENSDARG00000029874	ENSG00000138030	khk	KHK	NA	NA	-0.655859	0.00468421	NA	NA	NA	NA	-0.970062	0.000262616	ortholog_one2one	61.0738	60.8696	0	75.04	1	ortholog
ENSDARG00000029928	ENSG00000185009	ap3m1	AP3M1	1.0075	0.0181108	0.727149	0.0319209	NA	NA	0.940932	0.00043202	NA	NA	ortholog_one2one	82.0574	81.4727	75	100	1	ortholog
ENSDARG00000029936	ENSG00000139835	grtp1a	GRTP1	2.53506	0.000370593	NA	NA	NA	NA	NA	NA	NA	NA	ortholog_one2many	68.1548	64.3258	100	83.38	1	ortholog
ENSDARG00000029944	ENSG00000185480	parpbp	PARPBP	NA	NA	3.3376	1.94893e-06	NA	NA	NA	NA	2.60069	8.83415e-13	ortholog_one2one	38.6874	38.6874	50	29.4	1	ortholog
ENSDARG00000029955	ENSG00000163521	glb1l	GLB1L	2.27988	0.000105115	2.3302	3.00806e-10	0.647505	0.0196666	NA	NA	1.09688	0.000331558	ortholog_one2one	53.6697	55.8029	25	82.27	1	ortholog
ENSDARG00000030053	ENSG00000104529	eef1db	EEF1D	NA	NA	0.769097	1.02059e-08	NA	NA	1.07777	0.0015841	NA	NA	ortholog_one2one	27.9753	60.7383	50	55.84	1	ortholog
ENSDARG00000030092	ENSG00000065308	tram2	TRAM2	2.52672	0.000224927	2.04987	4.49436e-06	NA	NA	NA	NA	1.58892	5.90075e-05	ortholog_one2one	65.6757	65.4986	25	68.68	1	ortholog
ENSDARG00000030106	ENSG00000015592	stmn4	STMN4	0.789077	7.75163e-05	NA	NA	NA	NA	-1.55992	0.0155729	-2.85156	1.84322e-05	ortholog_one2many	59.7403	73.4043	0	82.1	1	ortholog
ENSDARG00000030108	ENSG00000265808	sec22ba	SEC22B	1.00634	0.0102494	NA	NA	NA	NA	NA	NA	NA	NA	ortholog_one2many	78.6047	78.6047	0	76.25	1	ortholog
ENSDARG00000030125	ENSG00000171056	sox7	SOX7	1.44968	0.0333868	NA	NA	NA	NA	-1.54891	0.00081836	-1.87084	1.99141e-09	ortholog_one2many	55.1546	54.8718	50	100	1	ortholog
ENSDARG00000030156	ENSG00000108784	naglu	NAGLU	NA	NA	0.815347	0.0206775	1.02355	0.000587621	1.46798	1.20579e-05	1.0567	6.05558e-06	ortholog_one2one	56.393	55.3501	25	92.79	1	ortholog
ENSDARG00000030161	ENSG00000173457	ppp1r14bb	PPP1R14B	NA	NA	0.725275	0.000556855	NA	NA	2.33287	7.65133e-07	2.91508	1.44261e-23	ortholog_one2many	65.3061	75	25	86.45	1	ortholog
ENSDARG00000030177	ENSG00000118939	uchl3	UCHL3	0.831367	0.0021582	NA	NA	NA	NA	NA	NA	NA	NA	ortholog_one2one	74.3478	74.3478	50	73.25	1	ortholog
ENSDARG00000030213	ENSG00000164576	sap30l	SAP30L	1.1788	0.00246051	NA	NA	NA	NA	NA	NA	NA	NA	ortholog_one2many	84.6995	87.0787	50	100	1	ortholog
ENSDARG00000030215	ENSG00000162510	matn1	MATN1	2.64834	0.035272	NA	NA	NA	NA	-1.33447	0.0244002	-1.3425	0.00522421	ortholog_one2one	66.7339	67.6892	0	92.74	1	ortholog
ENSDARG00000030224	ENSG00000113575	ppp2ca	PPP2CA	-1.27111	0.0423793	NA	NA	NA	NA	-0.746524	2.04407e-05	-0.617743	0.000293826	ortholog_one2many	97.0874	97.0874	0	100	1	ortholog
ENSDARG00000030239	ENSG00000174839	dennd6aa	DENND6A	-0.760859	0.000917914	NA	NA	NA	NA	0.867382	8.23136e-06	0.727165	1.12189e-06	ortholog_one2one	76.3158	77.3333	25	67.69	1	ortholog
ENSDARG00000030241	ENSG00000155959	vbp1	VBP1	0.961883	0.00139714	NA	NA	NA	NA	NA	NA	NA	NA	ortholog_one2one	76.1421	76.9231	25	82.74	1	ortholog
ENSDARG00000030250	ENSG00000162777	dennd2db	DENND2D	4.20941	0.00722614	3.10798	0.000368592	NA	NA	NA	NA	2.7818	1.08058e-08	ortholog_one2many	49.4692	47.7459	25	26.34	0	ortholog
ENSDARG00000030326	ENSG00000169242	efna1a	EFNA1	-1.41539	0.026094	-0.760703	0.000327013	NA	NA	NA	NA	NA	NA	ortholog_one2many	44.878	41.4414	25	56.45	1	ortholog
ENSDARG00000030364	ENSG00000154188	angpt1	ANGPT1	NA	NA	1.50401	1.19692e-08	0.758834	0.000675027	NA	NA	1.64018	0.0164136	ortholog_one2one	66.6667	64.7173	0	87.79	1	ortholog
ENSDARG00000030376	ENSG00000273079	grin2bb	GRIN2B	-0.727507	0.00398822	NA	NA	NA	NA	-3.37839	0.00307229	-5.83346	2.08195e-12	ortholog_one2many	68.1267	57.1186	25	81.42	1	ortholog
ENSDARG00000030417	ENSG00000008710	pkd1a	PKD1	NA	NA	0.789467	2.10634e-05	0.699607	3.58056e-05	-1.03001	0.00230546	-1.2164	0.00387699	ortholog_many2many	38.6707	38.2881	50	53.31	1	ortholog
ENSDARG00000030441	ENSG00000180817	ppa1b	PPA1	0.698319	0.0251093	NA	NA	NA	NA	NA	NA	-0.730758	0.0121096	ortholog_one2many	71.9723	71.4777	0	17.1	0	ortholog
ENSDARG00000030449	ENSG00000143320	crabp2b	CRABP2	NA	NA	1.25283	0.0253511	NA	NA	-1.89096	0.0140675	NA	NA	ortholog_one2many	67.3913	63.6986	0	69.16	1	ortholog
ENSDARG00000030463	ENSG00000159713	tppp3	TPPP3	NA	NA	-0.84746	0.0161667	NA	NA	NA	NA	NA	NA	ortholog_one2one	71.0227	70.6215	50	100	1	ortholog
ENSDARG00000030465	ENSG00000151135	tmem263	TMEM263	2.9248	0.000794166	1.88463	2.4844e-05	NA	NA	NA	NA	0.803355	0.000557878	ortholog_one2one	75	72.5	50	97.77	1	ortholog
ENSDARG00000030537	ENSG00000100764	psmc1a	PSMC1	1.06354	3.13014e-07	NA	NA	NA	NA	-0.6276	0.00302012	NA	NA	ortholog_one2many	97.9545	97.9545	0	99.77	1	ortholog
ENSDARG00000030547	ENSG00000172602	rnd1a	RND1	NA	NA	-0.634966	0.00100811	NA	NA	-1.33032	0.0128488	-2.30655	3.12955e-07	ortholog_one2many	78.0172	78.0172	0	100	1	ortholog
ENSDARG00000030591	ENSG00000116212	lrrc42	LRRC42	1.01198	0.035272	NA	NA	NA	NA	NA	NA	1.01843	1.00575e-05	ortholog_one2one	44.3925	46.683	75	53.63	1	ortholog
ENSDARG00000030598	ENSG00000105835	nampta	NAMPT	-1.16216	0.0404769	NA	NA	NA	NA	NA	NA	2.92803	4.86362e-06	ortholog_one2many	85.7434	85.3955	75	22.04	1	ortholog
ENSDARG00000030602	ENSG00000105372	rps19	RPS19	1.89359	9.04356e-07	1.05548	2.45946e-05	NA	NA	1.66008	0.000282729	2.04824	1.30472e-08	ortholog_one2one	88.2759	87.6712	0	93.92	1	ortholog
ENSDARG00000030604	ENSG00000164776	phkg1a	PHKG1	NA	NA	-0.922584	1.34784e-07	-1.30507	1.53997e-08	2.07775	0.00312742	2.34375	0.00112549	ortholog_one2many	72.6098	71.3198	25	90.49	1	ortholog
ENSDARG00000030616	ENSG00000082641	nfe2l1a	NFE2L1	NA	NA	1.1538	4.57973e-05	0.676574	0.0340317	NA	NA	-0.852698	0.000392905	ortholog_one2many	40.8031	44.5545	25	67.69	1	ortholog
ENSDARG00000030632	ENSG00000151468	ccdc3b	CCDC3	-1.23626	0.0365566	-0.732527	0.0179257	NA	NA	-2.46303	0.00126746	-1.46564	0.000756437	ortholog_one2many	55.9259	55.7196	0	79.33	1	ortholog
ENSDARG00000030633	ENSG00000178385	plekhm3	PLEKHM3	-0.671385	0.00436122	NA	NA	NA	NA	NA	NA	-2.62715	1.28805e-10	ortholog_one2one	46.7806	50.0703	75	73.28	1	ortholog
ENSDARG00000030644	ENSG00000065135	gnai3	GNAI3	-1.26203	0.0443775	NA	NA	NA	NA	1.20527	0.000302956	1.7303	1.56893e-27	ortholog_one2many	90.678	90.678	100	25.53	1	ortholog
ENSDARG00000030687	ENSG00000044446	phka2	PHKA2	NA	NA	NA	NA	-0.608947	2.71595e-05	NA	NA	NA	NA	ortholog_one2one	73.4413	74.5888	0	78.13	1	ortholog
ENSDARG00000030694	ENSG00000131100	atp6v1e1b	ATP6V1E1	0.676418	0.0115033	NA	NA	NA	NA	-1.36151	3.5739e-05	-1.43967	1.55473e-08	ortholog_many2many	78.3186	78.3186	50	58.25	1	ortholog
ENSDARG00000030700	ENSG00000171793	ctps1a	CTPS1	1.38537	0.00278073	0.708008	0.000468562	NA	NA	NA	NA	NA	NA	ortholog_one2many	86.6328	86.0504	0	95.34	1	ortholog
ENSDARG00000030723	ENSG00000013297	cldn11b	CLDN11	NA	NA	1.22398	0.00626504	NA	NA	NA	NA	-2.44295	0.0025642	ortholog_many2many	48.3092	39.0625	50	71.3	1	ortholog
ENSDARG00000030743	ENSG00000172296	sptlc3	SPTLC3	2.37008	0.00266357	3.34054	4.73026e-13	NA	NA	NA	NA	1.09491	0.0464489	ortholog_one2one	69.5652	69.4394	100	74.56	1	ortholog
ENSDARG00000030753	ENSG00000135378	prrg4	PRRG4	2.0698	0.00462833	2.56457	2.61481e-11	NA	NA	NA	NA	1.28979	0.0216754	ortholog_one2one	43.3628	46.6667	100	68.43	1	ortholog
ENSDARG00000030759	ENSG00000165304	melk	MELK	NA	NA	1.74343	6.1747e-06	NA	NA	5.07837	1.90873e-06	6.80054	1.76751e-37	ortholog_one2one	58.679	56.5089	50	62.38	1	ortholog
ENSDARG00000030761	ENSG00000139973	syt16	SYT16	-1.38868	0.032657	NA	NA	NA	NA	-2.49447	0.00804918	-4.05487	1.02765e-08	ortholog_one2one	19.3798	76.2195	25	63.01	0	ortholog
ENSDARG00000030765	ENSG00000138796	hadh	HADH	0.74311	0.0196233	0.638613	0.00721167	NA	NA	0.710908	0.00246859	0.810483	0.000774455	ortholog_one2one	74.5223	75.7282	75	100	1	ortholog
ENSDARG00000030782	ENSG00000283632	exoc3l2b	EXOC3L2	2.73598	0.00479547	3.79597	6.15163e-07	1.70102	5.88917e-06	NA	NA	NA	NA	ortholog_one2many	39.0274	36.3531	0	45.74	0	ortholog
ENSDARG00000030786	ENSG00000178802	mpi	MPI	-1.91946	0.0026842	NA	NA	NA	NA	NA	NA	NA	NA	ortholog_one2one	62.8842	63.0332	0	96.19	1	ortholog
ENSDARG00000030803	ENSG00000154642	C10H21orf91	C21orf91	-1.7638	0.00795968	NA	NA	NA	NA	NA	NA	-1.74244	0.000985427	ortholog_one2one	49.1582	52.7076	0	60.31	1	ortholog
ENSDARG00000030804	ENSG00000112584	fam120b	FAM120B	-0.845548	0.0119733	NA	NA	NA	NA	NA	NA	NA	NA	ortholog_one2one	27.2527	46.1825	0	38.93	0	ortholog
ENSDARG00000030824	ENSG00000117868	esyt2a	ESYT2	1.77692	0.0136399	0.841086	0.000846072	NA	NA	-0.604151	0.038379	NA	NA	ortholog_one2many	57.2748	55.8559	0	77.72	1	ortholog
ENSDARG00000030839	ENSG00000088992	tescb	TESC	0.617533	0.0460427	NA	NA	NA	NA	-1.55717	0.0199921	-1.53908	0.00211819	ortholog_one2many	35.0467	34.7222	0	50.93	1	ortholog
ENSDARG00000030844	ENSG00000172059	klf11a	KLF11	NA	NA	-0.867365	0.00519237	NA	NA	NA	NA	NA	NA	ortholog_one2many	42.3828	45.3027	50	61.98	1	ortholog
ENSDARG00000030933	ENSG00000141068	ksr1b	KSR1	1.07095	0.0491389	0.983143	0.00105401	NA	NA	NA	NA	-0.84683	0.02361	ortholog_one2many	54.9569	54.2553	25	66.39	1	ortholog
ENSDARG00000030938	ENSG00000149781	fermt3b	FERMT3	3.89498	1.73112e-07	1.65572	1.11131e-06	NA	NA	NA	NA	1.79436	2.50345e-05	ortholog_one2many	62.2926	64.3302	50	72.35	1	ortholog
ENSDARG00000030972	ENSG00000086061	dnaja1	DNAJA1	-1.12396	0.00490337	NA	NA	NA	NA	-0.715937	0.00301954	-0.792757	0.000713584	ortholog_one2one	71.0327	70.8543	0	47.05	0	ortholog
ENSDARG00000030999	ENSG00000185697	mybl1	MYBL1	NA	NA	1.78808	2.88484e-07	1.0655	0.0238426	1.06204	0.0201626	0.915815	0.0206074	ortholog_one2one	53.7234	54.5946	50	51.51	1	ortholog
ENSDARG00000031044	ENSG00000101670	lipg	LIPG	NA	NA	NA	NA	-0.605355	0.0324688	NA	NA	1.61087	0.0124192	ortholog_one2one	58.8	58.8	0	76.82	1	ortholog
ENSDARG00000031049	ENSG00000117154	igsf21a	IGSF21	NA	NA	-0.671907	0.000636381	NA	NA	NA	NA	-1.73823	0.00317112	ortholog_one2many	67.4518	63.1263	25	84.67	1	ortholog
ENSDARG00000031075	ENSG00000182985	cadm1a	CADM1	-1.78563	0.0194048	NA	NA	NA	NA	NA	NA	NA	NA	ortholog_one2many	58.3864	61.5213	0	74.05	1	ortholog
ENSDARG00000031095	ENSG00000197415	veph1	VEPH1	-3.19174	1.96911e-06	NA	NA	NA	NA	5.50569	2.24584e-06	3.97802	1.38227e-05	ortholog_one2one	58.3433	59.7786	25	66.56	1	ortholog
ENSDARG00000031098	ENSG00000105197	timm50	TIMM50	0.914886	0.0191473	NA	NA	NA	NA	NA	NA	NA	NA	ortholog_one2one	67.1388	61.2403	0	60.45	1	ortholog
ENSDARG00000031136	ENSG00000079931	moxd1	MOXD1	3.84091	0.000544031	1.6	0.0263476	1.55653	0.0201018	NA	NA	NA	NA	ortholog_one2one	58.5644	58.9491	25	67.46	1	ortholog
ENSDARG00000031202	ENSG00000253710	alg11	ALG11	0.79183	0.00141001	NA	NA	NA	NA	NA	NA	NA	NA	ortholog_one2one	63.4146	62.4	0	88.31	1	ortholog
ENSDARG00000031240	ENSG00000134313	kidins220a	KIDINS220	NA	NA	NA	NA	1.02444	0.00210167	NA	NA	-0.907264	0.00104112	ortholog_one2many	66.1773	69.1854	50	88.21	1	ortholog
ENSDARG00000031246	ENSG00000113070	hbegfb	HBEGF	3.63422	1.50359e-11	2.29396	3.44949e-08	NA	NA	NA	NA	NA	NA	ortholog_one2many	37.9808	30.038	0	55.79	1	ortholog
ENSDARG00000031269	ENSG00000164068	rnf123	RNF123	-1.39569	0.00510655	NA	NA	NA	NA	-1.01575	2.91628e-05	-1.16196	1.21792e-07	ortholog_one2one	74.5053	75.3077	0	86.84	1	ortholog
ENSDARG00000031293	ENSG00000213551	dnajc9	DNAJC9	1.05341	0.000799012	NA	NA	NA	NA	NA	NA	NA	NA	ortholog_one2one	56.5385	58.3333	0	69.44	1	ortholog
ENSDARG00000031316	ENSG00000184302	six6b	SIX6	6.63409	0.0405125	NA	NA	NA	NA	6.02499	0.0319081	7.97666	8.91537e-07	ortholog_one2many	41.0569	41.2245	75	100	1	ortholog
ENSDARG00000031317	ENSG00000125534	ppdpfb	PPDPF	2.07246	9.86329e-09	0.938623	0.000127289	NA	NA	NA	NA	NA	NA	ortholog_many2many	56.1404	55.6522	50	67.17	1	ortholog
ENSDARG00000031345	ENSG00000114993	RTKN	RTKN	-2.05569	0.00368721	NA	NA	NA	NA	1.38199	0.00314254	NA	NA	ortholog_one2many	55.7726	49.8413	0	66.36	1	ortholog
ENSDARG00000031348	ENSG00000176136	mc5ra	MC5R	NA	NA	-0.62862	0.00601051	NA	NA	NA	NA	NA	NA	ortholog_one2many	70.1538	69.5122	50	92.88	1	ortholog
ENSDARG00000031359	ENSG00000134326	cmpk2	CMPK2	NA	NA	5.66112	1.50588e-07	2.02751	0.0352424	NA	NA	NA	NA	ortholog_one2one	38.5301	42.6108	100	43.1	1	ortholog
ENSDARG00000031435	ENSG00000136810	TXN	TXN	1.48335	8.39147e-08	0.689655	0.00831889	NA	NA	NA	NA	NA	NA	ortholog_one2many	56.1905	54.6296	0	71.1	1	ortholog
ENSDARG00000031463	ENSG00000134207	syt6b	SYT6	-1.32786	0.018366	NA	NA	NA	NA	NA	NA	NA	NA	ortholog_one2many	65.8824	76.1905	25	93.89	1	ortholog
ENSDARG00000031494	ENSG00000204469	prrc2a	PRRC2A	-0.806867	0.00788153	NA	NA	NA	NA	NA	NA	NA	NA	ortholog_one2one	34.1678	38.3255	0	42.25	0	ortholog
ENSDARG00000031495	ENSG00000119335	seta	SET	0.808251	2.8311e-05	NA	NA	NA	NA	NA	NA	NA	NA	ortholog_one2many	88.0866	90.7063	0	81.16	1	ortholog
ENSDARG00000031506	ENSG00000119686	flvcr2b	FLVCR2	2.55248	6.71677e-11	1.9532	1.86308e-05	1.11293	6.5144e-06	2.34749	0.000313733	2.37112	1.98811e-10	ortholog_one2many	57.2243	60.8081	0	67.72	1	ortholog
ENSDARG00000031511	ENSG00000126067	psmb2	PSMB2	1.21638	1.17014e-07	0.803434	1.61634e-06	NA	NA	NA	NA	NA	NA	ortholog_one2one	80.597	81.407	50	96.86	1	ortholog
ENSDARG00000031540	ENSG00000164484	tmem200a	TMEM200A	-1.67818	0.0289986	-0.715285	3.14954e-07	NA	NA	-2.28272	0.0126459	NA	NA	ortholog_one2one	64.3585	63.5815	100	100	1	ortholog
ENSDARG00000031560	ENSG00000096063	srpk1b	SRPK1	-1.69074	0.00340493	NA	NA	NA	NA	NA	NA	NA	NA	ortholog_one2one	63.9695	63.6778	25	29.21	0	ortholog
ENSDARG00000031657	ENSG00000180185	fahd1	FAHD1	0.906843	0.0149548	NA	NA	NA	NA	NA	NA	NA	NA	ortholog_one2one	65.1786	66.6667	0	94.24	1	ortholog
ENSDARG00000031658	ENSG00000120549	si:ch211-207d6.2	KIAA1217	NA	NA	-0.981097	0.00621443	NA	NA	-2.08067	0.0108256	-2.07811	3.78191e-05	ortholog_one2many	28.2038	41.8321	50	55.76	1	ortholog
ENSDARG00000031678	ENSG00000204262	col5a2a	COL5A2	1.24893	0.0186754	NA	NA	NA	NA	NA	NA	2.59133	1.78203e-05	ortholog_one2one	69.2462	68.2446	50	72.04	1	ortholog
ENSDARG00000031680	ENSG00000012061	ercc1	ERCC1	0.681238	0.0331236	NA	NA	NA	NA	NA	NA	NA	NA	ortholog_one2one	56.229	48.8304	0	59.25	1	ortholog
ENSDARG00000031683	ENSG00000170345	fosab	FOS	-1.49976	3.99891e-05	-2.13149	4.85944e-11	-2.02997	1.02311e-05	NA	NA	NA	NA	ortholog_one2one	52.6316	57.3066	0	88.48	1	ortholog
ENSDARG00000031712	ENSG00000198822	grm3	GRM3	-2.7041	0.000407711	NA	NA	NA	NA	-1.98825	0.030112	-3.86937	1.16697e-10	ortholog_one2one	77.4744	77.0362	100	96.85	1	ortholog
ENSDARG00000031720	ENSG00000171603	clstn1	CLSTN1	-0.785614	0.0169893	NA	NA	NA	NA	-1.80476	6.20276e-07	-2.14038	2.47823e-15	ortholog_one2one	74.1081	76.2055	25	96.29	1	ortholog
ENSDARG00000031749	ENSG00000171860	C3AR1	C3AR1	NA	NA	1.58809	0.00527888	NA	NA	NA	NA	1.81027	0.000248355	ortholog_one2one	25.9336	35.2113	0	57.58	1	ortholog
ENSDARG00000031756	ENSG00000068305	mef2aa	MEF2A	-1.60187	0.0005082	NA	NA	NA	NA	-1.33102	0.000120658	-1.43336	1.10393e-10	ortholog_one2one	68.9379	75.1092	0	97.9	1	ortholog
ENSDARG00000031774	ENSG00000091127	pus7	PUS7	0.735864	0.0379998	NA	NA	NA	NA	NA	NA	0.793957	0.00188411	ortholog_one2one	65.2042	68.74	0	79.99	1	ortholog
ENSDARG00000031782	ENSG00000112297	crybg1a	CRYBG1	NA	NA	1.12862	0.000588213	NA	NA	NA	NA	2.10629	0.00284182	ortholog_one2many	24.4486	18.3257	50	15.12	0	ortholog
ENSDARG00000031795	ENSG00000204574	abcf1	ABCF1	1.42839	4.34812e-05	NA	NA	NA	NA	NA	NA	NA	NA	ortholog_one2one	63.6686	61.3455	0	81.76	1	ortholog
ENSDARG00000031796	ENSG00000087085	ache	ACHE	-0.907037	0.00150384	NA	NA	NA	NA	NA	NA	-1.16465	0.027077	ortholog_one2one	58.4691	56.6246	0	86.37	1	ortholog
ENSDARG00000031814	ENSG00000167536	dhrs13b.1	DHRS13	NA	NA	0.627581	0.0337022	NA	NA	NA	NA	1.35817	0.000742809	ortholog_one2many	42.1751	50	50	64.06	1	ortholog
ENSDARG00000031817	ENSG00000109654	trim2a	TRIM2	-2.96937	0.000155835	NA	NA	NA	NA	-0.953389	0.0132715	-1.98962	9.77092e-11	ortholog_one2many	77.0428	79.8387	50	81.61	1	ortholog
ENSDARG00000031888	ENSG00000107643	mapk8a	MAPK8	-1.6093	8.41657e-06	-0.831469	1.02059e-08	-0.633544	1.37121e-31	NA	NA	-1.50568	7.96776e-08	ortholog_one2many	85.4801	85.4801	50	77.92	1	ortholog
ENSDARG00000031890	ENSG00000176148	tcp11l1	TCP11L1	-0.740197	0.00291834	NA	NA	NA	NA	-1.19264	0.000740102	-1.66636	4.89404e-17	ortholog_one2one	53.6346	54.3825	50	75.36	1	ortholog
ENSDARG00000031954	ENSG00000125826	rbck1	RBCK1	1.30243	0.0257936	1.92326	4.3179e-14	NA	NA	0.941215	0.00152468	0.761487	0.00138443	ortholog_many2many	52.549	52.0388	25	65.27	1	ortholog
ENSDARG00000031971	ENSG00000134901	poglut2	POGLUT2	0.813608	0.000617212	NA	NA	NA	NA	1.51335	9.92761e-05	2.26754	3.13105e-11	ortholog_one2one	65.3386	65.6	0	95.15	1	ortholog
ENSDARG00000031981	ENSG00000166228	pcbd1	PCBD1	1.51183	0.00192742	0.696236	0.0161883	NA	NA	NA	NA	NA	NA	ortholog_one2one	70.1923	71.5686	25	93.65	1	ortholog
ENSDARG00000031983	ENSG00000100625	six4b	SIX4	NA	NA	1.327	0.040539	NA	NA	1.53286	0.0184995	1.21439	0.0493355	ortholog_many2many	37.2599	47.3171	50	41.29	1	ortholog
ENSDARG00000032005	ENSG00000139537	ccdc65	CCDC65	NA	NA	1.2309	0.015714	NA	NA	-1.33498	0.0285036	NA	NA	ortholog_one2one	40.7025	40.0406	25	0	0	ortholog
ENSDARG00000032049	ENSG00000154380	enah	ENAH	-0.597116	0.00576403	NA	NA	NA	NA	1.40513	2.46636e-05	0.72114	0.0126394	ortholog_one2one	62.5935	62.4378	100	74.13	1	ortholog
ENSDARG00000032072	ENSG00000102225	cdk16	CDK16	-1.86203	0.00121828	NA	NA	NA	NA	-0.935478	0.000140063	NA	NA	ortholog_one2one	77.8226	73.6641	0	62.27	1	ortholog
ENSDARG00000032083	ENSG00000092964	dpysl2b	DPYSL2	-1.15573	0.0227841	NA	NA	0.641695	2.0246e-08	-0.881539	0.00190945	-1.32876	1.84101e-06	ortholog_one2many	70.901	89.5522	0	65.45	1	ortholog
ENSDARG00000032102	ENSG00000165672	prdx3	PRDX3	0.853437	0.00743298	NA	NA	NA	NA	NA	NA	NA	NA	ortholog_one2one	70.7031	64.4128	0	66.73	1	ortholog
ENSDARG00000032103	ENSG00000069956	mapk6	MAPK6	NA	NA	NA	NA	-0.644084	3.02263e-06	-1.04561	0.000317596	-0.846353	0.000431373	ortholog_one2one	73.2316	72.428	25	100	1	ortholog
ENSDARG00000032126	ENSG00000166922	scg5	SCG5	5.63008	0.0360742	NA	NA	NA	NA	-1.7497	0.0198681	-1.69933	6.32426e-05	ortholog_one2many	74.5283	72.1461	50	54.64	1	ortholog
ENSDARG00000032131	ENSG00000151577	drd3	DRD3	-0.938059	0.024896	-0.823974	7.07292e-05	NA	NA	NA	NA	NA	NA	ortholog_one2one	61.75	53.0043	50	21.09	1	ortholog
ENSDARG00000032155	ENSG00000100614	ppm1aa	PPM1A	-1.76738	0.0139655	NA	NA	NA	NA	-0.978575	0.000241228	-1.49884	6.41439e-17	ortholog_one2many	83.7696	83.3333	100	98.18	1	ortholog
ENSDARG00000032157	ENSG00000198055	grk6	GRK6	-1.53371	0.00304259	NA	NA	NA	NA	-0.695073	0.00237099	NA	NA	ortholog_one2one	83.1597	83.3043	25	89.25	1	ortholog
ENSDARG00000032161	ENSG00000266028	srgap2	SRGAP2	NA	NA	0.642007	2.02461e-06	NA	NA	NA	NA	NA	NA	ortholog_one2many	76.8441	74.8182	75	87.82	1	ortholog
ENSDARG00000032197	ENSG00000118922	klf12b	KLF12	-2.64785	0.000113305	NA	NA	NA	NA	0.950782	0.0171869	NA	NA	ortholog_one2many	68.6567	79.5389	75	96.04	1	ortholog
ENSDARG00000032218	ENSG00000111058	acss3	ACSS3	1.16736	0.0202313	0.87969	0.00297169	NA	NA	NA	NA	1.24628	0.0423786	ortholog_one2one	63.8484	69.3038	75	74.88	1	ortholog
ENSDARG00000032264	ENSG00000101057	mybl2b	MYBL2	1.60854	0.0389366	2.88568	1.9595e-14	1.15942	2.60354e-05	5.67192	1.68048e-06	7.58973	6.26859e-44	ortholog_one2one	47.7143	52.7646	0	60.18	1	ortholog
ENSDARG00000032296	ENSG00000132963	pomp	POMP	1.39999	0.000425725	NA	NA	NA	NA	NA	NA	NA	NA	ortholog_one2one	75.1773	74.6479	0	99.32	1	ortholog
ENSDARG00000032318	ENSG00000151690	mfsd6a	MFSD6	2.52682	0.00115581	2.20701	0.00101043	NA	NA	-1.26592	0.0041762	-2.72834	1.20843e-16	ortholog_one2many	53.603	53.4678	0	83.78	1	ortholog
ENSDARG00000032340	ENSG00000183569	serhl	SERHL2	0.901505	0.00117003	0.655163	0.00311566	NA	NA	NA	NA	NA	NA	ortholog_one2one	35.0318	33.7423	0	0	0	ortholog
ENSDARG00000032344	ENSG00000065989	pde4a	PDE4A	-0.616018	0.000612703	NA	NA	NA	NA	-1.45316	0.00289988	-1.99898	1.34807e-07	ortholog_one2one	61.7381	70.399	0	81.15	1	ortholog
ENSDARG00000032431	ENSG00000115204	mpv17	MPV17	0.824509	0.0249181	NA	NA	NA	NA	NA	NA	0.832973	5.60163e-05	ortholog_one2one	66.4773	66.1017	75	84.22	1	ortholog
ENSDARG00000032435	ENSG00000144668	itga9	ITGA9	-1.00109	0.0182293	NA	NA	-0.880397	1.3402e-06	-1.42823	0.0107878	-1.54935	0.00112727	ortholog_one2one	64.6377	64.8256	25	79.9	1	ortholog
ENSDARG00000032469	ENSG00000133805	ampd3b	AMPD3	2.127	0.0108184	2.86792	1.78979e-09	0.964488	0.000597594	NA	NA	NA	NA	ortholog_one2many	72.4806	72.0154	100	36.78	1	ortholog
ENSDARG00000032496	ENSG00000005421	pon1	PON1	NA	NA	1.70683	1.82616e-05	NA	NA	NA	NA	NA	NA	ortholog_many2many	47.8873	47.7528	0	25.51	0	ortholog
ENSDARG00000032516	ENSG00000124541	rrp36	RRP36	NA	NA	0.918624	0.0377469	NA	NA	NA	NA	NA	NA	ortholog_one2one	44.0154	35.625	0	34.63	0	ortholog
ENSDARG00000032552	ENSG00000198060	march5	MARCHF5	-1.6678	0.0105019	NA	NA	NA	NA	NA	NA	NA	NA	ortholog_one2one	96.0432	95.0178	75	95.31	1	ortholog
ENSDARG00000032553	ENSG00000129521	egln3	EGLN3	NA	NA	1.24892	0.00113195	NA	NA	NA	NA	NA	NA	ortholog_one2one	62.7615	61.7284	100	59.6	1	ortholog
ENSDARG00000032617	ENSG00000127418	fgfrl1a	FGFRL1	NA	NA	0.605736	0.0167159	NA	NA	NA	NA	NA	NA	ortholog_one2one	63.4921	66.2526	50	89.85	1	ortholog
ENSDARG00000032619	ENSG00000141232	tob1a	TOB1	-0.706323	0.00486092	-0.972056	4.87842e-07	-0.870215	1.27032e-17	NA	NA	NA	NA	ortholog_one2many	79.4203	85.0932	25	100	1	ortholog
ENSDARG00000032627	ENSG00000136021	SCYL2	SCYL2	-0.635428	0.0170875	NA	NA	NA	NA	NA	NA	NA	NA	ortholog_one2one	70.6136	70.6136	0	81.65	1	ortholog
ENSDARG00000032631	ENSG00000213903	ltb4r	LTB4R	3.14299	9.42163e-05	2.12902	1.34695e-06	NA	NA	NA	NA	1.40881	0.00223518	ortholog_one2many	38.3523	35.5263	0	64.38	1	ortholog
ENSDARG00000032653	ENSG00000139146	sinhcaf	SINHCAF	-0.698618	0.0162824	-1.2105	2.37762e-13	NA	NA	3.41818	3.23936e-10	3.75503	3.48817e-18	ortholog_one2one	77.3756	69.7959	25	90.34	1	ortholog
ENSDARG00000032737	ENSG00000125675	gria3a	GRIA3	NA	NA	-0.650838	0.00599235	NA	NA	NA	NA	-1.47288	0.0016385	ortholog_one2many	85.2349	86.0045	0	76.91	1	ortholog
ENSDARG00000032765	ENSG00000173848	net1	NET1	1.23312	0.046167	1.35343	9.37522e-06	NA	NA	NA	NA	-1.07278	0.0361904	ortholog_one2one	59.5638	64.4283	0	78.61	1	ortholog
ENSDARG00000032780	ENSG00000151665	pigf	PIGF	1.02163	2.34175e-05	NA	NA	NA	NA	0.902817	2.23049e-06	1.18347	3.09782e-06	ortholog_one2one	52.0548	52.0548	25	65.7	1	ortholog
ENSDARG00000032816	ENSG00000149809	tm7sf2	TM7SF2	1.04527	0.0400379	NA	NA	NA	NA	NA	NA	NA	NA	ortholog_one2one	64.1148	63.658	25	54.55	1	ortholog
ENSDARG00000032820	ENSG00000133105	rxfp2a	RXFP2	NA	NA	-1.00507	0.000255092	NA	NA	NA	NA	-2.12094	0.0289269	ortholog_one2many	55.305	57.6763	50	55.15	1	ortholog
ENSDARG00000032836	ENSG00000135175	pvalb5	OCM2	NA	NA	-3.5332	0.00965873	NA	NA	NA	NA	NA	NA	ortholog_many2many	47.7064	48.1481	50	0	1	ortholog
ENSDARG00000032849	ENSG00000104419	ndrg1a	NDRG1	4.48039	0.000111601	2.47	0.0208264	NA	NA	NA	NA	NA	NA	ortholog_one2many	67.0051	67.3469	50	62.4	1	ortholog
ENSDARG00000032856	ENSG00000147144	ccdc120	CCDC120	-0.893914	0.00564348	NA	NA	NA	NA	NA	NA	NA	NA	ortholog_one2many	28.4483	32.1951	0	0	0	ortholog
ENSDARG00000032859	ENSG00000168672	lratd2	LRATD2	0.906955	0.0443775	NA	NA	NA	NA	3.28824	7.18203e-08	NA	NA	ortholog_one2many	56.129	64.684	25	83.76	1	ortholog
ENSDARG00000032865	ENSG00000124507	pacsin1a	PACSIN1	-2.09251	0.00262085	NA	NA	NA	NA	-3.19115	0.0191696	-5.51487	2.63202e-09	ortholog_one2many	71.1712	72.1461	0	85.66	1	ortholog
ENSDARG00000032866	ENSG00000100632	erh	ERH	0.85274	0.0434975	NA	NA	NA	NA	0.615538	0.0104378	1.0414	0.000591343	ortholog_one2one	99.0385	99.0385	0	99.06	1	ortholog
ENSDARG00000032868	ENSG00000184588	pde4ba	PDE4B	-0.707083	1.38424e-05	NA	NA	NA	NA	NA	NA	NA	NA	ortholog_one2many	73.6413	77.9856	100	79.6	1	ortholog
ENSDARG00000032933	ENSG00000091073	dtx2	DTX2	-0.632709	0.00284775	NA	NA	NA	NA	NA	NA	0.953445	0.000129867	ortholog_one2one	50.6431	51.4706	0	44.42	0	ortholog
ENSDARG00000032951	ENSG00000185189	nrbp2a	NRBP2	-1.60982	0.0062086	NA	NA	NA	NA	NA	NA	-0.92135	0.0128905	ortholog_one2many	60.8782	61	0	68.77	1	ortholog
ENSDARG00000032959	ENSG00000129159	kcnc1b	KCNC1	-1.42066	0.0408382	NA	NA	NA	NA	-2.13319	0.00268975	-3.32764	1.94146e-09	ortholog_one2many	75.5556	73.913	50	94.76	1	ortholog
ENSDARG00000032970	ENSG00000131143	cox4i1	COX4I1	0.862874	0.00539554	NA	NA	NA	NA	NA	NA	NA	NA	ortholog_one2one	64.497	64.497	100	91.65	1	ortholog
ENSDARG00000032985	ENSG00000108826	mrpl27	MRPL27	0.928252	0.00989782	NA	NA	NA	NA	NA	NA	NA	NA	ortholog_one2one	63.5135	63.5135	25	81.99	1	ortholog
ENSDARG00000032990	ENSG00000198753	plxnb3	PLXNB3	-1.668	0.0381843	NA	NA	NA	NA	NA	NA	-1.50774	0.00203396	ortholog_one2one	51.231	51.8558	25	45.58	0	ortholog
ENSDARG00000033042	ENSG00000149177	ptprja	PTPRJ	1.49041	0.0101599	2.89774	9.78962e-12	1.00404	0.0019231	NA	NA	-0.698792	0.0274432	ortholog_one2many	31.5632	25.5758	0	20.3	0	ortholog
ENSDARG00000033046	ENSG00000205089	ccni2	CCNI2	NA	NA	1.02925	0.0059994	2.01059	2.38942e-13	NA	NA	-1.36879	0.00184617	ortholog_one2one	30.6233	36.4516	50	36.32	1	ortholog
ENSDARG00000033104	ENSG00000149488	tmc2a	TMC2	NA	NA	-1.03834	0.0328069	NA	NA	-1.27246	0.0437948	-1.48765	0.0444139	ortholog_one2many	56.9536	56.3319	0	53.17	1	ortholog
ENSDARG00000033144	ENSG00000100911	psme2	PSME2	3.20134	2.83692e-14	2.73646	7.63953e-22	NA	NA	NA	NA	1.36261	1.2974e-05	ortholog_one2one	64.4352	63.1148	0	73.99	1	ortholog
ENSDARG00000033160	ENSG00000126368	nr1d1	NR1D1	-1.90714	2.65622e-06	-1.42957	1.33971e-17	-3.67144	7.43722e-164	-1.06683	0.0359521	-1.70307	0.000127044	ortholog_one2one	58.4691	56.3579	50	86.05	1	ortholog
ENSDARG00000033175	ENSG00000182004	snrpe	SNRPE	1.8489	5.79261e-06	NA	NA	NA	NA	1.20554	0.016388	1.78569	0.000312273	ortholog_one2one	94.5652	94.5652	50	99.3	1	ortholog
ENSDARG00000033227	ENSG00000145826	lect2l	LECT2	NA	NA	NA	NA	3.06229	0.0216129	NA	NA	NA	NA	ortholog_one2many	49.6689	47.7707	0	59.77	1	ortholog
ENSDARG00000033251	ENSG00000070882	osbpl3a	OSBPL3	3.08212	0.0453891	NA	NA	NA	NA	NA	NA	0.908967	0.0357498	ortholog_one2many	51.4092	56.0886	75	35.63	1	ortholog
ENSDARG00000033259	ENSG00000144535	dis3l2	DIS3L2	-0.977394	0.00825996	NA	NA	NA	NA	NA	NA	-0.745553	3.38896e-06	ortholog_one2one	58.6441	52.1608	0	64.77	1	ortholog
ENSDARG00000033273	ENSG00000164306	primpol	PRIMPOL	2.0007	0.0335555	2.54533	8.79018e-08	NA	NA	0.997817	2.77632e-05	1.28363	6.41326e-09	ortholog_one2one	46.9643	50.2868	0	58.35	1	ortholog
ENSDARG00000033296	ENSG00000170775	gpr37b	GPR37	-1.6333	0.0127479	NA	NA	NA	NA	NA	NA	-2.34585	3.76209e-05	ortholog_one2many	46.4927	46.6448	25	60.07	1	ortholog
ENSDARG00000033327	ENSG00000107731	unc5b	UNC5B	-1.3903	0.0124626	NA	NA	NA	NA	NA	NA	NA	NA	ortholog_one2one	66.5608	66.9149	0	93.79	1	ortholog
ENSDARG00000033345	ENSG00000044459	cntln	CNTLN	NA	NA	0.667803	0.0183809	0.720972	0.00716897	1.57817	2.76572e-06	1.58232	4.40863e-05	ortholog_one2one	28.3784	35.625	25	18.02	0	ortholog
ENSDARG00000033411	ENSG00000157782	cabp1b	CABP1	NA	NA	-0.767519	0.0403985	NA	NA	-2.43764	0.018227	-4.37947	5.38818e-10	ortholog_one2many	36.2162	80.2395	0	62.48	1	ortholog
ENSDARG00000033440	ENSG00000164024	metap1	METAP1	0.617058	0.000413167	NA	NA	NA	NA	NA	NA	NA	NA	ortholog_one2one	86.0104	81.9753	25	94.75	1	ortholog
ENSDARG00000033450	ENSG00000189134	nkap	NKAPL	0.840454	0.0404667	NA	NA	NA	NA	NA	NA	-1.74886	0.00293327	ortholog_one2many	51.2438	55.9783	0	50.44	1	ortholog
ENSDARG00000033451	ENSG00000150756	atpsckmt	ATPSCKMT	0.862441	0.049777	NA	NA	NA	NA	NA	NA	NA	NA	ortholog_one2one	58.7983	61.1607	0	72.5	1	ortholog
ENSDARG00000033466	ENSG00000149591	tagln2	TAGLN	1.96518	0.000457253	1.27228	0.00074836	NA	NA	NA	NA	2.1916	0.00035479	ortholog_one2many	68.6567	68.6567	0	98.04	1	ortholog
ENSDARG00000033489	ENSG00000198833	ube2j1	UBE2J1	-1.20035	0.0101322	NA	NA	NA	NA	NA	NA	NA	NA	ortholog_one2one	63.522	64.3312	50	63.9	1	ortholog
ENSDARG00000033498	ENSG00000198963	rorb	RORB	-2.46337	0.00955667	NA	NA	NA	NA	-1.83063	0.0434879	-2.01206	0.00169111	ortholog_one2one	85.1852	83.9056	75	88.27	1	ortholog
ENSDARG00000033533	ENSG00000136710	ccdc115	CCDC115	0.805428	0.00510845	NA	NA	NA	NA	NA	NA	NA	NA	ortholog_one2one	40.5556	35.4369	0	0	0	ortholog
ENSDARG00000033544	ENSG00000166106	adamts15b	ADAMTS15	NA	NA	2.52655	2.18278e-07	2.76185	0.000392198	2.52746	0.0108105	2.77081	9.20379e-06	ortholog_one2many	61.6842	62.6738	25	66.83	1	ortholog
ENSDARG00000033596	ENSG00000102978	polr2c	POLR2C	0.959174	0.00384104	NA	NA	NA	NA	NA	NA	NA	NA	ortholog_one2one	89.8182	89.8182	50	100	1	ortholog
ENSDARG00000033604	ENSG00000163956	lrpap1	LRPAP1	1.16725	4.38911e-07	NA	NA	NA	NA	-0.902682	0.00149976	-0.803661	0.00012105	ortholog_one2one	52.9412	54.7826	50	76.81	1	ortholog
ENSDARG00000033683	ENSG00000140416	tpma	TPM1	-0.629528	0.000727035	NA	NA	NA	NA	NA	NA	NA	NA	ortholog_one2many	92.2535	92.2535	50	72.63	1	ortholog
ENSDARG00000033735	ENSG00000158517	ncf1	NCF1	NA	NA	1.30487	6.87577e-05	NA	NA	NA	NA	2.20366	2.39574e-06	ortholog_one2one	53.5897	50.9756	0	80.44	1	ortholog
ENSDARG00000033742	ENSG00000185013	nt5c1bb	NT5C1B	NA	NA	0.970786	0.00169716	NA	NA	NA	NA	NA	NA	ortholog_many2many	41.6364	62.9121	0	0	0	ortholog
ENSDARG00000033757	ENSG00000025770	ncaph2	NCAPH2	1.4972	0.00925999	1.90161	2.52226e-05	NA	NA	NA	NA	NA	NA	ortholog_one2one	37.5207	38.3446	25	35.97	0	ortholog
ENSDARG00000033804	ENSG00000143376	snx27a	SNX27	-1.53187	0.00186752	NA	NA	NA	NA	NA	NA	-0.719916	0.000520647	ortholog_one2many	77.2643	73.7213	25	95.13	1	ortholog
ENSDARG00000033840	ENSG00000165323	fat3a	FAT3	-1.7056	0.00648935	NA	NA	NA	NA	NA	NA	NA	NA	ortholog_one2many	62.5409	62.3777	25	97.42	1	ortholog
ENSDARG00000033855	ENSG00000144580	cnot9	CNOT9	0.668107	0.00253455	NA	NA	NA	NA	NA	NA	0.695011	2.44961e-05	ortholog_one2one	93.6455	93.9597	25	95.87	1	ortholog
ENSDARG00000033967	ENSG00000188917	trmt2b	TRMT2B	NA	NA	1.08563	0.00171961	NA	NA	NA	NA	0.76775	0.000272712	ortholog_one2one	49.2063	51.6667	0	52.93	1	ortholog
ENSDARG00000033971	ENSG00000116132	prrx1a	PRRX1	3.3607	0.00245058	2.47074	0.00250812	1.53773	0.00317507	2.95346	5.18134e-11	2.65961	1.12331e-14	ortholog_one2many	82.8571	82.8571	0	51.73	1	ortholog
ENSDARG00000033973	ENSG00000181610	mrps23	MRPS23	0.860465	0.0254101	NA	NA	NA	NA	NA	NA	NA	NA	ortholog_one2one	40	40.4255	50	37.78	1	ortholog
ENSDARG00000033999	ENSG00000095596	cyp26a1	CYP26A1	1.51611	1.9419e-06	NA	NA	NA	NA	-2.46115	0.00615005	-2.03766	0.0178416	ortholog_one2one	68.008	68.6992	25	87.95	1	ortholog
ENSDARG00000034160	ENSG00000163798	slc4a1ap	SLC4A1AP	-1.43242	2.30487e-07	NA	NA	NA	NA	-0.704061	0.000111051	-0.990832	3.78864e-13	ortholog_one2one	46.1055	47.7865	50	50.11	1	ortholog
ENSDARG00000034165	ENSG00000169783	lingo1a	LINGO1	-2.13396	0.00429934	NA	NA	NA	NA	-1.50847	0.013713	-2.57319	1.39772e-05	ortholog_one2many	81.2903	81.4216	25	99.84	1	ortholog
ENSDARG00000034168	ENSG00000163536	serpini1	SERPINI1	NA	NA	-0.654937	0.0102374	NA	NA	-2.63692	0.0042327	-4.093	5.15177e-11	ortholog_one2one	58.0488	57.3494	0	79.82	1	ortholog
ENSDARG00000034222	ENSG00000118960	hs1bp3	HS1BP3	3.02732	3.27889e-07	2.45998	1.44717e-05	NA	NA	1.15989	3.12401e-06	0.753984	0.00181427	ortholog_one2one	35.9694	40.4011	0	33.74	0	ortholog
ENSDARG00000034291	ENSG00000145592	rpl37	RPL37	1.92785	4.77786e-07	1.03975	1.40863e-05	NA	NA	0.992364	0.00579286	NA	NA	ortholog_one2one	92.7835	92.7835	0	99.01	1	ortholog
ENSDARG00000034321	ENSG00000099260	palmdb	PALMD	-2.03256	1.5044e-05	NA	NA	NA	NA	NA	NA	0.910485	0.0262959	ortholog_one2many	12.5227	48.2517	100	0	0	ortholog
ENSDARG00000034344	ENSG00000165194	pcdh19	PCDH19	-0.790524	0.0148754	NA	NA	NA	NA	-1.62032	0.00447703	-1.7907	0.00071438	ortholog_one2one	66.9861	70.6801	25	96.48	1	ortholog
ENSDARG00000034396	ENSG00000166986	mars1	MARS1	0.842331	0.0110037	0.615469	0.00687728	NA	NA	NA	NA	NA	NA	ortholog_one2one	62.1111	58.7802	75	68.5	1	ortholog
ENSDARG00000034423	ENSG00000173267	sncga	SNCG	NA	NA	0.674599	0.00109392	NA	NA	-2.68301	0.00724927	-4.46885	4.93805e-11	ortholog_one2many	48.0315	54.955	100	61.88	1	ortholog
ENSDARG00000034424	ENSG00000129244	atp1b2b	ATP1B2	NA	NA	-1.08839	0.0169678	NA	NA	NA	NA	NA	NA	ortholog_one2many	55.1724	54.7945	0	68.18	1	ortholog
ENSDARG00000034427	ENSG00000206053	jpt2	JPT2	1.20657	2.87445e-06	0.81352	0.000374529	NA	NA	1.10015	0.0145333	0.692089	0.00995706	ortholog_one2one	32.1053	27.9817	50	21.51	1	ortholog
ENSDARG00000034453	ENSG00000109103	unc119a	UNC119	-1.63904	0.0227539	NA	NA	NA	NA	NA	NA	NA	NA	ortholog_one2many	62.0833	73.0392	50	71.95	1	ortholog
ENSDARG00000034470	ENSG00000149925	aldoab	ALDOA	NA	NA	2.19078	0.00011644	NA	NA	-1.0697	0.000858116	-0.676851	0.0135589	ortholog_one2many	73.2057	84.0659	25	85.32	1	ortholog
ENSDARG00000034493	ENSG00000183454	grin2aa	GRIN2A	-1.03784	0.00315049	-0.908351	0.00228732	-0.786091	6.59896e-06	-2.91203	0.00942199	-4.85755	1.63462e-09	ortholog_one2one	67.0082	67.1918	75	89.89	1	ortholog
ENSDARG00000034503	ENSG00000132326	per2	PER2	-1.56067	0.000366511	NA	NA	-0.681734	4.03029e-15	NA	NA	-1.12229	0.000471225	ortholog_one2one	50.5179	45.3181	0	68.73	1	ortholog
ENSDARG00000034522	ENSG00000154917	rab6ba	RAB6B	-0.788289	3.39126e-07	NA	NA	NA	NA	-1.82145	0.000356177	-2.73457	2.93981e-13	ortholog_one2many	93.75	90.6977	50	44.95	1	ortholog
ENSDARG00000034541	ENSG00000163513	tgfbr2b	TGFBR2	1.94284	0.00363861	NA	NA	NA	NA	NA	NA	1.11198	0.0129736	ortholog_one2many	65.4321	66.7266	75	77.88	1	ortholog
ENSDARG00000034555	ENSG00000116117	pard3bb	PARD3B	NA	NA	0.766731	0.000372192	0.8345	4.51919e-07	2.03356	2.23049e-06	NA	NA	ortholog_one2many	28.3817	54.372	25	41.25	0	ortholog
ENSDARG00000034559	ENSG00000102359	srpx2	SRPX2	NA	NA	2.514	4.87457e-06	1.15233	0.0292552	2.41315	0.0323304	5.21604	6.92026e-15	ortholog_one2one	52.2581	52.8261	25	73.65	1	ortholog
ENSDARG00000034633	ENSG00000100908	emc9	EMC9	0.753662	0.0137319	NA	NA	NA	NA	NA	NA	NA	NA	ortholog_one2one	51.4423	52.1951	0	47.9	0	ortholog
ENSDARG00000034643	ENSG00000183386	fhl3a	FHL3	2.94485	1.14058e-06	4.07045	1.07733e-13	NA	NA	NA	NA	1.46301	9.26166e-08	ortholog_one2many	68.9286	69.1756	50	98.4	1	ortholog
ENSDARG00000034685	ENSG00000188760	tmem198b	TMEM198	1.12024	0.017883	NA	NA	NA	NA	NA	NA	NA	NA	ortholog_one2many	60	58.5366	50	91.79	1	ortholog
ENSDARG00000034718	ENSG00000003436	tfpia	TFPI	NA	NA	3.06567	2.306e-06	2.09716	9.36794e-05	2.62119	0.00791387	4.12946	2.44527e-15	ortholog_one2one	30.9211	33.6918	50	12.45	1	ortholog
ENSDARG00000034757	ENSG00000104219	zdhhc2	ZDHHC2	NA	NA	-0.711777	0.000425661	NA	NA	NA	NA	NA	NA	ortholog_one2one	73.5695	74.7922	100	80.8	1	ortholog
ENSDARG00000034771	ENSG00000143545	rab13	RAB13	2.02048	0.000197092	1.44768	0.000342978	NA	NA	2.04462	8.57898e-06	2.5899	2.56046e-18	ortholog_one2many	76.3547	77.5	0	80.63	1	ortholog
ENSDARG00000034773	ENSG00000151503	ncapd3	NCAPD3	NA	NA	2.25889	1.29886e-10	0.961464	0.00178397	0.80131	0.0181295	0.620906	0.0150749	ortholog_one2one	43.725	46.1593	0	57.59	1	ortholog
ENSDARG00000034777	ENSG00000100348	txn2	TXN2	0.727669	0.0331518	NA	NA	NA	NA	0.643549	0.0217116	NA	NA	ortholog_one2one	53.012	53.012	0	62.92	1	ortholog
ENSDARG00000034801	ENSG00000065534	mylka	MYLK	1.0634	0.0375784	0.8438	0.0263256	NA	NA	NA	NA	NA	NA	ortholog_one2many	30.9822	65.9622	25	68.13	1	ortholog
ENSDARG00000034817	ENSG00000104763	asah1b	ASAH1	0.657483	0.0198768	0.897295	0.00100072	NA	NA	0.748355	0.0175906	0.709835	0.0128659	ortholog_one2many	59.2405	59.2405	0	69.95	1	ortholog
ENSDARG00000034871	ENSG00000080561	mid2	MID2	-1.97971	0.00818965	NA	NA	NA	NA	NA	NA	NA	NA	ortholog_one2one	77.6871	82.0402	25	98.01	1	ortholog
ENSDARG00000034883	ENSG00000107897	acbd5a	ACBD5	-0.722077	6.48227e-05	NA	NA	NA	NA	NA	NA	-0.744706	0.00140145	ortholog_one2many	39.2381	40.9543	0	30.57	0	ortholog
ENSDARG00000034896	ENSG00000169744	ldb2b	LDB2	-1.2037	0.0243977	NA	NA	NA	NA	-2.11733	0.0012512	-2.39189	2.70097e-07	ortholog_one2many	69.7051	67.7083	75	30.27	1	ortholog
ENSDARG00000034897	ENSG00000124614	rps10	RPS10	2.02134	2.3843e-08	1.13631	3.97976e-05	NA	NA	1.30169	0.00110934	2.09033	1.2934e-07	ortholog_one2many	92.1212	91.5663	50	100	1	ortholog
ENSDARG00000034907	ENSG00000182749	paqr7b	PAQR7	-1.62775	0.0285138	NA	NA	NA	NA	NA	NA	NA	NA	ortholog_one2one	54.3353	53.1073	0	89.2	1	ortholog
ENSDARG00000034933	ENSG00000106554	chchd3b	CHCHD3	1.86279	0.0145875	NA	NA	NA	NA	NA	NA	1.16201	1.9671e-09	ortholog_one2many	38.7665	19.5991	0	0	0	ortholog
ENSDARG00000034956	ENSG00000116990	myclb	MYCL	-1.80751	4.76451e-07	-0.788049	0.00242013	-0.630014	2.18631e-05	2.66255	1.73032e-05	1.60771	0.00270253	ortholog_one2many	48.0769	43.3168	25	85.4	1	ortholog
ENSDARG00000034957	ENSG00000111906	hddc2	HDDC2	1.31931	0.00586432	NA	NA	NA	NA	NA	NA	NA	NA	ortholog_one2one	59.8039	61	75	71.56	1	ortholog
ENSDARG00000034975	ENSG00000180758	gpr157	GPR157	2.04898	0.0145878	2.50114	3.2824e-08	1.11074	0.0121534	NA	NA	1.66575	0.00114468	ortholog_one2one	54.6269	56.3077	50	78.99	1	ortholog
ENSDARG00000034988	ENSG00000005981	asb4	ASB4	2.07903	0.00168187	0.721735	0.0415199	NA	NA	NA	NA	-1.49594	0.0313801	ortholog_one2one	58.4507	57.2414	50	96.35	1	ortholog
ENSDARG00000035018	ENSG00000154096	thy1	THY1	1.77594	0.00786326	1.54804	0.000417533	NA	NA	-1.8334	0.00154851	-1.68107	2.53577e-05	ortholog_one2many	22.3602	23.5294	0	0	0	ortholog
ENSDARG00000035043	ENSG00000123349	pfdn5	PFDN5	0.856482	0.0163232	NA	NA	NA	NA	NA	NA	1.18013	0.00448585	ortholog_one2one	77.9221	78.4314	25	86.07	1	ortholog
ENSDARG00000035054	ENSG00000114209	pdcd10a	PDCD10	0.672124	0.00234122	NA	NA	NA	NA	NA	NA	NA	NA	ortholog_one2many	93.3962	94.2857	25	100	1	ortholog
ENSDARG00000035066	ENSG00000108312	ubtf	UBTF	-0.691427	0.00491002	NA	NA	NA	NA	NA	NA	NA	NA	ortholog_many2many	64.0052	66.5306	75	80.42	1	ortholog
ENSDARG00000035080	ENSG00000160207	hsf2bp	HSF2BP	NA	NA	-0.939542	0.0484732	NA	NA	1.79656	0.00296424	NA	NA	ortholog_one2one	44.9102	41.0959	25	66.16	1	ortholog
ENSDARG00000035120	ENSG00000178445	gldc	GLDC	1.68672	3.39126e-07	1.95434	3.66051e-10	0.70664	0.000362669	1.38654	0.00191443	1.40727	0.00677945	ortholog_one2one	61.7647	64.2202	0	74.45	1	ortholog
ENSDARG00000035136	ENSG00000178980	selenow1	SELENOW	1.1113	0.00540702	NA	NA	NA	NA	NA	NA	NA	NA	ortholog_one2one	57.4713	56.8182	25	28.44	0	ortholog
ENSDARG00000035147	ENSG00000161036	lrwd1	LRWD1	1.56917	0.0402379	1.48302	8.30998e-06	NA	NA	NA	NA	NA	NA	ortholog_one2one	40.9583	34.7313	25	25.7	0	ortholog
ENSDARG00000035152	ENSG00000006125	ap2b1	AP2B1	-0.656013	0.00738995	NA	NA	NA	NA	NA	NA	-0.9537	4.88128e-08	ortholog_one2one	94.2166	94.2166	25	61.09	1	ortholog
ENSDARG00000035167	ENSG00000175581	mrpl48	MRPL48	1.35079	0.0136486	NA	NA	NA	NA	NA	NA	NA	NA	ortholog_one2one	49.0566	50.2415	100	53.82	1	ortholog
ENSDARG00000035184	ENSG00000168890	tmem150ab	TMEM150A	-1.74284	0.00910871	NA	NA	NA	NA	1.07975	0.000129131	1.38082	1.26958e-09	ortholog_one2many	69.0037	63.6054	0	96.58	1	ortholog
ENSDARG00000035198	ENSG00000176928	gcnt4a	GCNT4	3.29177	0.0153159	NA	NA	NA	NA	-2.24836	0.00149307	-2.70357	8.46973e-08	ortholog_one2many	54.9669	58.1776	75	82.36	1	ortholog
ENSDARG00000035253	ENSG00000113389	npr3	NPR3	NA	NA	-0.741778	2.74483e-10	-0.655307	1.67034e-07	NA	NA	NA	NA	ortholog_one2one	50.0924	53.9841	0	77.87	1	ortholog
ENSDARG00000035264	ENSG00000058729	riok2	RIOK2	0.886023	0.00222208	NA	NA	NA	NA	NA	NA	NA	NA	ortholog_one2one	64.8551	69.9219	0	76.56	1	ortholog
ENSDARG00000035282	ENSG00000127774	emc6	EMC6	0.896262	0.00350529	NA	NA	NA	NA	NA	NA	NA	NA	ortholog_one2one	89.0909	89.0909	25	100	1	ortholog
ENSDARG00000035285	ENSG00000141027	ncor1	NCOR1	-0.630076	0.0410641	NA	NA	NA	NA	NA	NA	NA	NA	ortholog_one2one	57.1721	58.1735	50	64.37	1	ortholog
ENSDARG00000035309	ENSG00000168032	entpd3	ENTPD3	NA	NA	NA	NA	-0.9291	0.0420459	-2.71867	0.0199888	-3.41391	3.31891e-06	ortholog_one2one	47.259	50.3018	0	69.53	1	ortholog
ENSDARG00000035333	ENSG00000159055	mis18a	MIS18A	NA	NA	0.989518	0.0352522	NA	NA	0.912299	0.00340587	1.06791	2.26612e-05	ortholog_one2one	30.4721	36.9792	25	0	0	ortholog
ENSDARG00000035338	ENSG00000179636	tppp2	TPPP2	-1.19608	0.0212484	NA	NA	NA	NA	NA	NA	NA	NA	ortholog_one2one	61.7647	58.0111	0	0	0	ortholog
ENSDARG00000035352	ENSG00000168092	pafah1b2	PAFAH1B2	-1.84553	0.0018513	NA	NA	NA	NA	NA	NA	-0.728443	4.38931e-08	ortholog_one2one	69.4323	69.7368	0	55.59	1	ortholog
ENSDARG00000035360	ENSG00000141503	mink1	MINK1	-0.956895	0.00378153	NA	NA	NA	NA	-1.195	6.30911e-06	-1.87398	3.18796e-13	ortholog_one2one	74.1742	77.6119	25	80.59	1	ortholog
ENSDARG00000035398	ENSG00000171617	enc1	ENC1	-0.655939	0.0356798	NA	NA	NA	NA	-3.57974	0.000506607	-3.79351	2.03803e-20	ortholog_one2one	88.7946	88.4941	100	99.94	1	ortholog
ENSDARG00000035400	ENSG00000145741	btf3	BTF3	1.07986	0.000247425	NA	NA	NA	NA	0.984043	0.000246088	0.925641	8.19919e-05	ortholog_one2one	96.9136	96.9136	100	100	1	ortholog
ENSDARG00000035415	ENSG00000171522	ptger4b	PTGER4	-1.36173	0.0494753	NA	NA	NA	NA	NA	NA	NA	NA	ortholog_one2many	56.7623	55.7344	25	74.4	1	ortholog
ENSDARG00000035420	ENSG00000079482	ophn1	OPHN1	NA	NA	1.13886	0.00040437	NA	NA	1.45934	0.010086	NA	NA	ortholog_one2one	63.0923	63.25	50	67.93	1	ortholog
ENSDARG00000035452	ENSG00000004660	camkk1a	CAMKK1	-1.52321	0.00641989	NA	NA	NA	NA	-3.11758	0.000550487	-4.13239	2.32109e-16	ortholog_one2many	63.7624	66.9439	50	65.02	1	ortholog
ENSDARG00000035459	ENSG00000182557	spns3	SPNS3	3.17335	6.7247e-06	1.30855	0.00199332	NA	NA	NA	NA	NA	NA	ortholog_one2one	48.2422	49.5984	50	22.68	1	ortholog
ENSDARG00000035468	ENSG00000148339	slc25a25b	SLC25A25	-1.926	0.000921186	NA	NA	-0.586071	1.47326e-06	NA	NA	NA	NA	ortholog_one2many	78.835	77.4809	50	91.64	1	ortholog
ENSDARG00000035506	ENSG00000054179	entpd2a.1	ENTPD2	1.37996	0.038636	2.60513	1.4804e-08	0.634302	0.0255847	NA	NA	NA	NA	ortholog_one2many	49.4949	48.8048	0	62.24	1	ortholog
ENSDARG00000035514	ENSG00000042980	adam28	ADAM28	9.02938	0.000580225	2.87355	0.007518	NA	NA	NA	NA	NA	NA	ortholog_one2one	38.1936	38.6928	0	43.19	0	ortholog
ENSDARG00000035521	ENSG00000104332	sfrp1a	SFRP1	NA	NA	0.935789	8.86434e-07	0.85372	4.01548e-08	NA	NA	-2.09731	0.049836	ortholog_one2many	58.5987	62.1622	50	85.65	1	ortholog
ENSDARG00000035533	ENSG00000115353	tacr1a	TACR1	-1.50678	0.04457	NA	NA	NA	NA	NA	NA	NA	NA	ortholog_one2many	69.0418	65.9624	0	90.93	1	ortholog
ENSDARG00000035544	ENSG00000164089	etnppl	ETNPPL	NA	NA	-0.642638	0.04391	NA	NA	NA	NA	-2.58353	0.00559476	ortholog_one2one	64.7295	65.6504	0	84.08	1	ortholog
ENSDARG00000035552	ENSG00000180772	agtr2	AGTR2	2.76739	0.000359782	NA	NA	NA	NA	NA	NA	NA	NA	ortholog_one2one	40.4959	40.8333	0	77.97	1	ortholog
ENSDARG00000035553	ENSG00000169562	cx27.5	GJB1	NA	NA	NA	NA	0.96076	0.0419615	NA	NA	-2.49489	0.00747243	ortholog_one2many	56.1837	62.5984	0	79.34	1	ortholog
ENSDARG00000035556	ENSG00000177189	rps6ka3a	RPS6KA3	1.33313	0.000541675	0.770773	0.0393181	NA	NA	NA	NA	NA	NA	ortholog_one2many	84.8649	85.7924	25	84.63	1	ortholog
ENSDARG00000035559	ENSG00000141510	tp53	TP53	1.54908	0.0177192	1.25473	0.000912404	NA	NA	2.06464	3.54032e-06	2.46811	1.66431e-15	ortholog_one2one	48.3461	51.4905	0	54.14	1	ortholog
ENSDARG00000035565	ENSG00000185344	atp6v0a2b	ATP6V0A2	0.671041	0.0452593	NA	NA	NA	NA	0.656264	0.00838822	NA	NA	ortholog_one2many	68.1075	68.669	0	62.54	1	ortholog
ENSDARG00000035573	ENSG00000085231	AK6	AK6	1.37203	0.00228993	NA	NA	NA	NA	NA	NA	NA	NA	ortholog_one2one	74.4186	73.5632	25	93.87	1	ortholog
ENSDARG00000035607	ENSG00000176915	ankle2	ANKLE2	-1.63382	0.0313526	NA	NA	NA	NA	NA	NA	NA	NA	ortholog_one2one	47.2281	46.0978	25	67.34	1	ortholog
ENSDARG00000035608	ENSG00000247077	pgam5	PGAM5	0.728742	0.0210977	NA	NA	NA	NA	NA	NA	NA	NA	ortholog_one2one	65.0519	65.0519	50	67.65	1	ortholog
ENSDARG00000035609	ENSG00000102195	mtnr1c	GPR50	NA	NA	-1.20541	0.0255715	NA	NA	4.02273	0.0480784	NA	NA	ortholog_one2one	26.9044	45.9834	50	54.59	1	ortholog
ENSDARG00000035622	ENSG00000100219	xbp1	XBP1	0.588471	0.0108417	0.606136	0.000309714	NA	NA	NA	NA	NA	NA	ortholog_one2one	29.2553	41.8251	25	98.72	1	ortholog
ENSDARG00000035631	ENSG00000128228	sdf2l1	SDF2L1	1.22969	0.00617694	NA	NA	NA	NA	NA	NA	1.19939	0.000399158	ortholog_one2one	64.7059	65.5963	50	84.98	1	ortholog
ENSDARG00000035655	ENSG00000164754	rad21b	RAD21	-1.83443	0.000397984	NA	NA	NA	NA	NA	NA	NA	NA	ortholog_one2many	79.8732	79.1209	0	90.58	1	ortholog
ENSDARG00000035660	ENSG00000142687	si:ch211-193k19.1	KIAA0319L	-1.2033	0.0295536	NA	NA	NA	NA	NA	NA	-0.65051	0.00335185	ortholog_one2one	49.857	54.0848	0	60.27	1	ortholog
ENSDARG00000035679	ENSG00000256646			1.32198	7.95002e-06	0.667684	0.00336192	NA	NA	NA	NA	NA	NA	ortholog_many2many	94.8718	63.2479	0	97.18	1	ortholog
ENSDARG00000035692	ENSG00000145425	rps3a	RPS3A	1.7122	1.59471e-10	1.15782	1.00653e-05	NA	NA	1.29816	0.00137361	2.77177	4.03393e-10	ortholog_one2one	94.3182	93.2584	75	100	1	ortholog
ENSDARG00000035695	ENSG00000260428	scxa	SCX	1.82545	0.00707749	NA	NA	NA	NA	NA	NA	NA	NA	ortholog_one2one	62.6866	63.3166	50	93.55	1	ortholog
ENSDARG00000035699	ENSG00000153037	srp19	SRP19	0.665186	0.0338272	NA	NA	NA	NA	-0.610316	0.00657177	NA	NA	ortholog_one2one	68.0556	69.5035	0	60.05	1	ortholog
ENSDARG00000035732	ENSG00000133794	arntl1b	ARNTL	NA	NA	NA	NA	1.15285	1.26734e-21	NA	NA	NA	NA	ortholog_one2many	84.0256	81.5504	100	90.16	1	ortholog
ENSDARG00000035763	ENSG00000168818	stx18	STX18	0.682243	0.0402578	NA	NA	NA	NA	NA	NA	NA	NA	ortholog_one2one	63.8806	68.1529	75	36.37	1	ortholog
ENSDARG00000035809	ENSG00000108821	col1a1b	COL1A1	NA	NA	2.26597	2.60446e-05	1.01078	7.3558e-05	NA	NA	4.85517	1.41658e-07	ortholog_one2many	72.3361	73.0849	0	79.65	1	ortholog
ENSDARG00000035810	ENSG00000102760	rgcc	RGCC	NA	NA	-0.608976	0.0272599	-1.42075	1.42075e-07	1.30717	0.0261	NA	NA	ortholog_one2one	47.4453	50.7812	50	73.71	1	ortholog
ENSDARG00000035819	ENSG00000142082	sirt3	SIRT3	-0.766879	0.0156198	-0.781976	3.20191e-06	NA	NA	NA	NA	-0.687565	0.000446833	ortholog_one2one	50.3759	56.3025	0	72.7	1	ortholog
ENSDARG00000035832	ENSG00000131096	pyyb	PYY	1.89911	0.0053693	NA	NA	-0.61044	2.94322e-07	NA	NA	NA	NA	ortholog_one2many	41.1111	38.9474	0	67.09	1	ortholog
ENSDARG00000035858	ENSG00000064666	cnn2	CNN2	3.25347	8.8878e-12	2.74983	1.88429e-08	NA	NA	1.81803	0.0218233	2.10148	0.000589427	ortholog_one2one	72.4919	72.9642	0	84.15	1	ortholog
ENSDARG00000035859	ENSG00000167772	angptl4	ANGPTL4	2.20869	0.000144341	2.28659	5.48645e-06	NA	NA	NA	NA	NA	NA	ortholog_one2one	41.3793	34.2159	0	60.3	1	ortholog
ENSDARG00000035860	ENSG00000233927	rps28	RPS28	1.81525	5.40174e-05	0.832707	0.00200898	NA	NA	1.12364	0.0097593	1.30009	2.85451e-06	ortholog_one2one	95.6522	95.6522	25	100	1	ortholog
ENSDARG00000035871	ENSG00000156482	rpl30	RPL30	1.65647	1.86279e-07	0.760533	0.00148221	NA	NA	1.70593	7.18011e-06	1.35866	1.15504e-06	ortholog_one2one	96.5217	94.8718	75	100	1	ortholog
ENSDARG00000035873	ENSG00000179431	fjx1	FJX1	-0.779501	0.04962	NA	NA	NA	NA	NA	NA	1.45489	0.00151113	ortholog_one2one	37.2998	41.0579	50	71.65	1	ortholog
ENSDARG00000035879	ENSG00000179163	fuca1.2	FUCA1	1.79336	0.00039754	2.30333	7.60568e-06	0.70334	0.0037221	NA	NA	1.03692	0.0189397	ortholog_one2many	61.3734	63.4146	0	61.85	1	ortholog
ENSDARG00000035883	ENSG00000116981	nt5c1aa	NT5C1A	-1.34359	0.00371527	NA	NA	NA	NA	NA	NA	-2.3694	0.0117304	ortholog_one2many	69.837	66.9271	0	82.72	1	ortholog
ENSDARG00000035890	ENSG00000179163	fuca1.1	FUCA1	1.35596	0.000156486	0.83021	0.00147181	NA	NA	NA	NA	1.03692	0.0189397	ortholog_one2many	61.3734	63.4146	0	54.38	1	ortholog
ENSDARG00000035895	ENSG00000160097	fndc5b	FNDC5	-1.84198	0.0185718	-0.65351	0.000120327	NA	NA	-1.19764	0.0457849	-1.53745	0.012933	ortholog_one2many	67.4528	69.0821	0	85.6	1	ortholog
ENSDARG00000035909	ENSG00000168389	mfsd2ab	MFSD2A	NA	NA	-0.756766	0.000274514	NA	NA	0.999013	0.0271172	0.910088	0.0244979	ortholog_one2many	63.3962	64.2447	50	82.69	1	ortholog
ENSDARG00000035913	ENSG00000134684	yars1	YARS1	0.914436	0.000151824	NA	NA	NA	NA	-0.891007	0.00166096	-0.68356	0.000738043	ortholog_one2one	81.25	81.0964	50	92.95	1	ortholog
ENSDARG00000035914	ENSG00000174695	tmem167a	TMEM167A	1.32314	0.000405405	NA	NA	NA	NA	NA	NA	NA	NA	ortholog_one2one	84.7222	84.7222	100	82.81	1	ortholog
ENSDARG00000035949	ENSG00000106460	tmem106bb	TMEM106B	-1.5017	0.0489844	NA	NA	NA	NA	NA	NA	NA	NA	ortholog_one2one	71.5328	73.4082	50	89.79	1	ortholog
ENSDARG00000035957	ENSG00000112312	gmnn	GMNN	1.00035	0.0210533	NA	NA	NA	NA	1.94716	0.000256487	2.08649	9.11667e-10	ortholog_one2one	41.6268	36.0996	50	37.38	1	ortholog
ENSDARG00000035970	ENSG00000155093	ptprn2	PTPRN2	-1.03214	0.00153825	NA	NA	NA	NA	-1.52808	0.00368318	-2.09649	5.93615e-09	ortholog_one2one	44.532	44.0117	100	39.13	1	ortholog
ENSDARG00000035985	ENSG00000177150	fam210aa	FAM210A	0.87155	0.0109645	NA	NA	NA	NA	NA	NA	NA	NA	ortholog_one2many	50.7353	57.0248	100	66.88	1	ortholog
ENSDARG00000035987	ENSG00000128789	psmg2	PSMG2	1.27099	7.37348e-05	NA	NA	NA	NA	NA	NA	NA	NA	ortholog_one2one	51.1364	51.9231	50	74.5	1	ortholog
ENSDARG00000036028	ENSG00000113369	arrdc3b	ARRDC3	1.4932	0.00347957	NA	NA	NA	NA	NA	NA	1.00835	0.00296071	ortholog_one2many	76.087	76.4563	25	95.22	1	ortholog
ENSDARG00000036031	ENSG00000184702	sept5b	SEPTIN5	-2.21257	0.000602457	NA	NA	NA	NA	-2.54661	0.000145887	-3.20725	2.5327e-19	ortholog_many2many	83.7398	83.7398	25	94.39	1	ortholog
ENSDARG00000036036	ENSG00000110492	mdka	MDK	NA	NA	1.09058	1.18548e-05	NA	NA	1.99219	0.0166574	4.00133	3.46202e-23	ortholog_one2many	60.1399	58.9041	100	75.83	1	ortholog
ENSDARG00000036057	ENSG00000102871	tradd	TRADD	2.40343	4.39435e-07	2.19892	1.73306e-06	1.14804	0.000368023	NA	NA	NA	NA	ortholog_one2one	37.8205	40.273	25	30.93	0	ortholog
ENSDARG00000036060	ENSG00000223496	exosc6	EXOSC6	1.04098	0.00594114	NA	NA	NA	NA	NA	NA	-0.879246	1.46966e-05	ortholog_one2one	45.9559	46.1255	0	94.13	1	ortholog
ENSDARG00000036061	ENSG00000087263	ogfod1	OGFOD1	0.619519	0.00586432	NA	NA	NA	NA	NA	NA	NA	NA	ortholog_one2one	51.476	53.5509	0	57.33	1	ortholog
ENSDARG00000036066	ENSG00000156006	si:dkey-78a14.4	NAT2	NA	NA	NA	NA	-0.693078	0.00049648	NA	NA	1.89589	0.022005	ortholog_many2many	39.6552	39.9306	0	96.95	1	ortholog
ENSDARG00000036074	ENSG00000245848	cebpa	CEBPA	1.58253	1.23975e-09	1.42746	1.08627e-05	NA	NA	NA	NA	NA	NA	ortholog_one2one	47.2067	58.6806	0	100	1	ortholog
ENSDARG00000036076	ENSG00000155393	heatr3	HEATR3	1.00576	0.0091769	NA	NA	NA	NA	NA	NA	NA	NA	ortholog_one2one	52.2059	52.0528	50	77.3	1	ortholog
ENSDARG00000036096	ENSG00000166949	smad3a	SMAD3	NA	NA	0.641753	3.32331e-05	0.607458	0.0408587	NA	NA	-0.732982	0.0250237	ortholog_one2many	96.9412	96.9412	50	60.97	1	ortholog
ENSDARG00000036104	ENSG00000136286	myo1g	MYO1G	1.33667	0.026847	1.94375	8.57112e-16	NA	NA	NA	NA	2.68053	5.09758e-06	ortholog_one2one	60.9037	62.1242	0	77.15	1	ortholog
ENSDARG00000036107	ENSG00000265972	txnipa	TXNIP	1.43822	0.00179591	1.6359	0.0069822	NA	NA	2.23621	7.02144e-08	1.73812	9.91622e-07	ortholog_one2many	58.312	57	0	92.59	1	ortholog
ENSDARG00000036136	ENSG00000075131	tipin	TIPIN	0.789636	0.0483191	NA	NA	NA	NA	0.665858	0.0132765	1.12028	2.98329e-07	ortholog_one2one	42.1927	42.9054	25	39.52	0	ortholog
ENSDARG00000036139	ENSG00000188501	lctla	LCTL	3.12872	0.00600038	NA	NA	NA	NA	NA	NA	2.13847	1.92211e-05	ortholog_one2many	59.4356	61.0507	50	91.11	1	ortholog
ENSDARG00000036156	ENSG00000187239	fnbp1a	FNBP1	-2.18624	0.000238228	NA	NA	NA	NA	NA	NA	-1.28613	1.3381e-06	ortholog_one2many	69.53	68.4211	0	90.11	1	ortholog
ENSDARG00000036159	ENSG00000174417	trhrb	TRHR	-2.12803	0.000313767	-0.982543	0.0047079	-0.701724	7.84534e-10	NA	NA	NA	NA	ortholog_one2many	64.0704	63.9098	50	89.51	1	ortholog
ENSDARG00000036168	ENSG00000131196	nfatc1	NFATC1	NA	NA	0.705894	0.024315	0.717735	0.00678816	NA	NA	NA	NA	ortholog_one2one	45.4931	49.481	50	66.24	1	ortholog
ENSDARG00000036175	ENSG00000156453	pcdh1b	PCDH1	-1.34816	9.57452e-05	NA	NA	NA	NA	-1.34943	0.00250034	-1.44107	0.000222678	ortholog_one2many	59.8222	67.7036	0	95.68	1	ortholog
ENSDARG00000036179	ENSG00000157483	myo1ea	MYO1E	1.42849	0.00266806	NA	NA	NA	NA	NA	NA	NA	NA	ortholog_one2one	81.5884	80.9311	50	79.54	1	ortholog
ENSDARG00000036180	ENSG00000157456	ccnb2	CCNB2	NA	NA	3.09679	2.80097e-06	NA	NA	3.75422	0.000141478	5.12403	2.27349e-29	ortholog_one2one	51.7588	53.3679	50	13.62	1	ortholog
ENSDARG00000036186	ENSG00000197971	mbpa	MBP	NA	NA	-1.90079	2.76886e-05	NA	NA	NA	NA	-3.16728	0.000773795	ortholog_one2many	15.7895	35.0365	75	0	0	ortholog
ENSDARG00000036189	ENSG00000150628	spata4	SPATA4	NA	NA	1.50057	0.00366202	NA	NA	NA	NA	NA	NA	ortholog_one2one	34.7541	47.3214	25	56.93	1	ortholog
ENSDARG00000036190	ENSG00000141759	txnl4a	TXNL4A	0.837621	0.0215135	NA	NA	NA	NA	NA	NA	NA	NA	ortholog_one2one	97.1831	97.1831	0	100	1	ortholog
ENSDARG00000036222	ENSG00000122585	npy	NPY	NA	NA	-1.10335	0.0181007	-1.15992	1.55237e-15	NA	NA	-3.30388	0.000199501	ortholog_one2one	61.8557	62.5	75	69.51	1	ortholog
ENSDARG00000036282	ENSG00000026297	rnaset2	RNASET2	0.769781	0.0231692	NA	NA	NA	NA	NA	NA	NA	NA	ortholog_one2many	42.1875	45	25	32.46	0	ortholog
ENSDARG00000036291	ENSG00000070081	nucb2b	NUCB2	NA	NA	NA	NA	-0.68654	3.26307e-05	NA	NA	0.600551	0.0366318	ortholog_one2many	66.4286	64.8837	0	63.95	1	ortholog
ENSDARG00000036298	ENSG00000110700	rps13	RPS13	1.6964	4.04542e-06	1.00399	1.38517e-05	NA	NA	1.5558	8.88763e-05	1.61176	3.49888e-07	ortholog_one2one	97.351	97.351	50	100	1	ortholog
ENSDARG00000036308	ENSG00000106100	nod1	NOD1	NA	NA	2.33886	6.8867e-09	1.21344	2.46359e-06	NA	NA	1.21753	0.00596873	ortholog_one2one	46.17	48.7265	25	82.8	1	ortholog
ENSDARG00000036316	ENSG00000198918	rpl39	RPL39	1.89415	8.76071e-06	0.978902	0.000145543	NA	NA	1.40385	0.00186264	2.58024	1.18224e-09	ortholog_one2one	98.0392	98.0392	100	98.1	1	ortholog
ENSDARG00000036329	ENSG00000125356	ndufa1	NDUFA1	1.14265	0.0205165	NA	NA	NA	NA	NA	NA	NA	NA	ortholog_one2one	64.2857	63.3803	75	88.83	1	ortholog
ENSDARG00000036337	ENSG00000154227	cers3b	CERS3	4.79174	0.0180558	NA	NA	NA	NA	NA	NA	NA	NA	ortholog_one2many	45.953	50.1424	0	10.07	0	ortholog
ENSDARG00000036359	ENSG00000170854	riox2	RIOX2	1.21787	0.00553091	NA	NA	NA	NA	NA	NA	NA	NA	ortholog_one2one	56.5591	49.8106	0	52.36	1	ortholog
ENSDARG00000036371	ENSG00000143632	acta1a	ACTA1	NA	NA	NA	NA	-1.38991	0.0456522	-2.25099	2.66401e-05	-1.27307	0.00141839	ortholog_one2many	99.4695	99.4695	50	100	1	ortholog
ENSDARG00000036375	ENSG00000055163	cyfip2	CYFIP2	-0.88417	0.000977193	NA	NA	NA	NA	-1.70227	0.000319334	-2.76316	4.52431e-15	ortholog_one2one	98.1644	98.2428	50	84.22	1	ortholog
ENSDARG00000036442	ENSG00000101974	atp11c	ATP11C	-0.870166	0.0213166	NA	NA	NA	NA	1.32581	0.001042	0.929921	0.00623165	ortholog_one2one	70.062	66.9771	25	75.73	1	ortholog
ENSDARG00000036446	ENSG00000005249	PRKAR2B	PRKAR2B	-1.65699	0.0206782	NA	NA	NA	NA	-1.82347	0.00233169	-2.01862	3.17559e-06	ortholog_one2one	69.6172	73.1156	50	70.45	1	ortholog
ENSDARG00000036456	ENSG00000196975	anxa4	ANXA4	3.29064	8.38567e-13	3.49012	1.50274e-13	0.926532	0.027252	NA	NA	NA	NA	ortholog_one2one	63.8629	63.8629	50	58.68	1	ortholog
ENSDARG00000036473	ENSG00000104976	snapc2	SNAPC2	0.870729	0.00810025	NA	NA	NA	NA	NA	NA	NA	NA	ortholog_one2one	32.6347	26.3923	0	0	0	ortholog
ENSDARG00000036479	ENSG00000148841	ITPRIP	ITPRIP	NA	NA	3.01816	0.00444543	NA	NA	NA	NA	1.24048	0.00218855	ortholog_one2many	32.7239	26.0553	0	63.01	1	ortholog
ENSDARG00000036483	ENSG00000165985	c1ql3b	C1QL3	1.53572	0.0147157	NA	NA	NA	NA	-4.05513	0.00601898	-5.94041	1.37999e-10	ortholog_one2many	80.7843	83.7398	25	76.76	1	ortholog
ENSDARG00000036541	ENSG00000007384	rhbdf1a	RHBDF1	1.32805	0.000584289	0.602777	0.00159991	NA	NA	NA	NA	1.11133	0.00217178	ortholog_one2one	77.6608	77.4796	50	98.59	1	ortholog
ENSDARG00000036542	ENSG00000160199	pknox1.2	PKNOX1	-0.880608	0.0498252	NA	NA	NA	NA	NA	NA	NA	NA	ortholog_one2many	71.3303	69.8876	0	64.55	1	ortholog
ENSDARG00000036546	ENSG00000160209	pdxkb	PDXK	-1.65169	0.0231194	NA	NA	NA	NA	-1.05678	0.000380561	-1.53467	1.60531e-11	ortholog_one2many	66.6667	67.9739	0	76.63	1	ortholog
ENSDARG00000036548	ENSG00000267534	s1pr2	S1PR2	NA	NA	0.752978	0.0098107	0.819018	0.00104555	1.87342	8.20404e-05	1.69866	0.000112826	ortholog_one2one	57.5071	54.8649	0	92.51	1	ortholog
ENSDARG00000036549	ENSG00000160216	agpat3	AGPAT3	-0.952543	0.00590704	NA	NA	NA	NA	NA	NA	-0.996292	2.91508e-05	ortholog_one2one	75.5319	75.3316	0	91.89	1	ortholog
ENSDARG00000036558	ENSG00000182871	col18a1a	COL18A1	NA	NA	NA	NA	0.827653	0.00167157	NA	NA	1.32487	0.0134507	ortholog_one2many	44.5855	43.167	0	26.57	0	ortholog
ENSDARG00000036567	ENSG00000129673	aanat1	AANAT	1.45701	0.0320391	1.40538	0.000396307	NA	NA	NA	NA	NA	NA	ortholog_one2many	66.6667	67.6471	0	97.92	1	ortholog
ENSDARG00000036571	ENSG00000170381	sema3e	SEMA3E	NA	NA	-0.851427	0.000982646	NA	NA	NA	NA	NA	NA	ortholog_one2one	55.871	56.3802	100	51.5	1	ortholog
ENSDARG00000036584	ENSG00000101638	st8sia5	ST8SIA5	-1.92788	0.00285368	NA	NA	NA	NA	-2.33634	0.0268491	NA	NA	ortholog_one2one	72.6064	66.5854	25	84.36	1	ortholog
ENSDARG00000036593	ENSG00000089094	kdm2ba	KDM2B	-0.944896	0.0277587	NA	NA	NA	NA	NA	NA	NA	NA	ortholog_one2many	37.3503	56.5119	75	58.52	1	ortholog
ENSDARG00000036619	ENSG00000128268	mgat3b	MGAT3	-2.10391	0.00723328	NA	NA	NA	NA	-1.75587	6.5477e-05	-3.00696	1.49986e-10	ortholog_one2many	59.4747	53.82	25	84.26	1	ortholog
ENSDARG00000036625	ENSG00000100142	polr2f	POLR2F	0.878148	0.0437515	NA	NA	NA	NA	NA	NA	-2.85284	1.63322e-05	ortholog_one2one	86.6142	86.6142	25	100	1	ortholog
ENSDARG00000036626	ENSG00000167680	sema6ba	SEMA6B	-2.2192	0.0044272	NA	NA	NA	NA	-1.62252	0.00404538	-2.7991	5.9253e-08	ortholog_one2many	49.5495	49.162	0	41.72	0	ortholog
ENSDARG00000036629	ENSG00000164587	rps14	RPS14	1.84129	4.56306e-06	1.08954	3.14904e-05	NA	NA	1.26537	0.000576414	1.8225	6.40687e-07	ortholog_one2one	99.3377	99.3377	25	100	1	ortholog
ENSDARG00000036678	ENSG00000145331	trmt10a	TRMT10A	1.05992	0.000729558	NA	NA	NA	NA	0.694821	0.0211779	NA	NA	ortholog_one2one	58.1121	57.9412	25	72.67	1	ortholog
ENSDARG00000036684	ENSG00000267855	ndufa7	NDUFA7	1.00469	0.00457433	NA	NA	NA	NA	NA	NA	0.712135	0.0201425	ortholog_one2many	54.8673	59.6154	0	43.88	0	ortholog
ENSDARG00000036685	ENSG00000082258	ccnt2a	CCNT2	0.717177	0.036396	NA	NA	NA	NA	NA	NA	NA	NA	ortholog_one2one	50.8219	58.8889	75	96.2	1	ortholog
ENSDARG00000036721	ENSG00000130204	tomm40l	TOMM40	0.798858	0.017001	NA	NA	NA	NA	NA	NA	NA	NA	ortholog_one2many	68.4211	73.0769	25	0	0	ortholog
ENSDARG00000036775	ENSG00000129480	dtd2	DTD2	1.00407	0.024883	NA	NA	NA	NA	NA	NA	NA	NA	ortholog_one2one	63.6905	63.6905	50	94.92	1	ortholog
ENSDARG00000036784	ENSG00000149600	commd7	COMMD7	1.04337	0.00253455	NA	NA	NA	NA	NA	NA	NA	NA	ortholog_one2many	60	60	25	52.43	1	ortholog
ENSDARG00000036791	ENSG00000088305	dnmt3bb.1	DNMT3B	0.939651	0.00315692	1.78463	5.70821e-09	0.821245	5.42719e-08	NA	NA	1.12062	0.00575358	ortholog_one2one	52.755	55.1471	50	62.73	1	ortholog
ENSDARG00000036809	ENSG00000166825	ANPEP	ANPEP	NA	NA	2.85287	0.000491118	2.61769	1.39141e-08	NA	NA	2.76113	0.000163192	ortholog_one2many	55.2223	55.625	0	74.33	1	ortholog
ENSDARG00000036844	ENSG00000182173	tsen54	TSEN54	NA	NA	NA	NA	0.804996	0.00479956	NA	NA	NA	NA	ortholog_one2one	34.4106	45.5919	0	66.59	1	ortholog
ENSDARG00000036863	ENSG00000176658	MYO1D	MYO1D	NA	NA	0.72883	0.0288402	NA	NA	NA	NA	-2.24732	1.82648e-05	ortholog_one2one	80.5169	80.6773	0	72.12	1	ortholog
ENSDARG00000036864	ENSG00000157765	slc34a2b	SLC34A2	NA	NA	0.97748	0.0140533	0.858516	0.0410759	NA	NA	3.61292	5.21037e-06	ortholog_one2many	53.3333	54.0382	0	16.54	0	ortholog
ENSDARG00000036865	ENSG00000146411	slc2a12	SLC2A12	NA	NA	NA	NA	0.596882	0.0327924	NA	NA	-1.45483	0.00718039	ortholog_one2one	41.329	41.8033	50	75.49	1	ortholog
ENSDARG00000036875	ENSG00000112306	rps12	RPS12	2.28132	2.4966e-08	1.56324	9.66144e-08	NA	NA	1.38261	0.00156097	1.12842	0.00264359	ortholog_one2one	96.9697	96.9697	0	96.82	1	ortholog
ENSDARG00000036878	ENSG00000198478	sh3bgrl2	SH3BGRL2	NA	NA	-0.893815	0.00371761	-1.01423	0.00433817	-1.71873	5.30088e-05	-2.66144	8.02152e-13	ortholog_one2one	67.2897	68.5714	50	57.97	1	ortholog
ENSDARG00000036893	ENSG00000124491	f13a1b	F13A1	3.70054	4.62754e-11	1.28305	0.00841285	NA	NA	NA	NA	4.2861	2.86076e-05	ortholog_one2one	47.541	46.9003	0	8.75	0	ortholog
ENSDARG00000036894	ENSG00000164022	aimp1b	AIMP1	NA	NA	NA	NA	1.75254	0.0363258	0.824833	4.62928e-06	0.620743	0.000219715	ortholog_one2many	42.9487	38.7283	50	29.54	1	ortholog
ENSDARG00000036911	ENSG00000085365	scamp1	SCAMP1	-1.59445	0.0212544	NA	NA	NA	NA	-0.888237	0.00591093	-1.19018	1.02775e-11	ortholog_one2one	78.4024	78.4024	0	83.13	1	ortholog
ENSDARG00000036913	ENSG00000160408	st6galnac6	ST6GALNAC6	-2.47499	0.00341505	NA	NA	NA	NA	-1.13995	0.00219049	-1.31953	9.41363e-09	ortholog_one2many	47.4474	48.4663	25	87.68	1	ortholog
ENSDARG00000036952	ENSG00000260903	XKR7	XKR7	-1.49431	0.0210194	NA	NA	NA	NA	NA	NA	-3.17133	0.00295335	ortholog_one2many	56.304	58.2143	0	98.4	1	ortholog
ENSDARG00000036965	ENSG00000101236	rnf24	RNF24	-1.25241	0.0255724	NA	NA	NA	NA	NA	NA	NA	NA	ortholog_one2one	84.4595	83.8926	25	100	1	ortholog
ENSDARG00000036966	ENSG00000099377	hsd3b7	HSD3B7	NA	NA	NA	NA	-0.711484	0.0303934	NA	NA	1.81668	1.16427e-05	ortholog_one2one	53.3875	53.5326	0	55.93	1	ortholog
ENSDARG00000036990	ENSG00000129187	dctd	DCTD	2.43686	0.017477	3.13115	1.59564e-09	NA	NA	NA	NA	0.638037	0.00629348	ortholog_one2one	78.6517	69.6517	0	91.33	1	ortholog
ENSDARG00000036995	ENSG00000164167	lsm6	LSM6	1.01429	0.0108569	NA	NA	NA	NA	NA	NA	0.797237	0.000996985	ortholog_one2one	96.25	96.25	75	100	1	ortholog
ENSDARG00000036998	ENSG00000134287	arf3b	ARF3	-2.78529	0.00267572	NA	NA	NA	NA	-1.04339	0.000307644	-1.37584	2.61075e-09	ortholog_many2many	100	100	0	100	1	ortholog
ENSDARG00000036999	ENSG00000204624	DISP3	DISP3	-1.48081	0.0209723	NA	NA	NA	NA	NA	NA	NA	NA	ortholog_one2one	52.8736	58.2278	0	75.86	1	ortholog
ENSDARG00000037000	ENSG00000134285	fkbp11	FKBP11	1.97842	0.0116586	1.1159	0.0243411	NA	NA	NA	NA	NA	NA	ortholog_one2one	48.7562	51.0417	0	0	0	ortholog
ENSDARG00000037009	ENSG00000175334	banf1	BANF1	1.24065	6.65295e-05	NA	NA	NA	NA	0.910411	0.00110324	1.04996	0.000147788	ortholog_one2one	82.0225	81.1111	0	97.98	1	ortholog
ENSDARG00000037012	ENSG00000168003	slc3a2b	SLC3A2	0.763927	0.00529845	NA	NA	-0.633592	5.62407e-10	NA	NA	0.639649	0.00548878	ortholog_one2many	32.7032	34.3254	0	51.91	1	ortholog
ENSDARG00000037038	ENSG00000100519	psmc6	PSMC6	0.606795	0.000525491	NA	NA	NA	NA	NA	NA	NA	NA	ortholog_one2one	97.1722	97.1722	0	100	1	ortholog
ENSDARG00000037046	ENSG00000182185	rad51b	RAD51B	1.63477	0.0151482	1.32942	6.51859e-06	0.828304	0.0113068	0.961615	0.00254783	0.878209	0.00061814	ortholog_one2one	54	50.6702	25	56.47	1	ortholog
ENSDARG00000037059	ENSG00000129353	slc44a2	SLC44A2	-0.928193	0.0301841	NA	NA	NA	NA	0.845143	0.00525675	NA	NA	ortholog_one2many	67.7054	65.8402	0	80.42	1	ortholog
ENSDARG00000037060	ENSG00000167548	kmt2d	KMT2D	-1.13523	0.00868146	NA	NA	NA	NA	NA	NA	-1.30945	0.000509752	ortholog_one2many	26.8196	44.6617	25	53.57	1	ortholog
ENSDARG00000037069	ENSG00000175048	zdhhc14	ZDHHC14	-1.66203	0.000297068	NA	NA	NA	NA	NA	NA	-1.11529	0.000227991	ortholog_one2one	61.2705	58.2846	50	88.93	1	ortholog
ENSDARG00000037070	ENSG00000215712	tmem242	TMEM242	1.03509	0.00510669	NA	NA	NA	NA	-1.08806	7.59218e-06	-1.1112	1.93993e-07	ortholog_one2one	55.3191	54.9296	25	56.02	1	ortholog
ENSDARG00000037079	ENSG00000163001	cfap36	CFAP36	0.728315	0.0422599	NA	NA	NA	NA	NA	NA	NA	NA	ortholog_one2one	37.7193	36.8571	0	13.46	0	ortholog
ENSDARG00000037097	ENSG00000003989	slc7a2	SLC7A2	6.15293	0.0133384	NA	NA	NA	NA	NA	NA	NA	NA	ortholog_many2many	65.3495	67.1875	100	65.29	1	ortholog
ENSDARG00000037099	ENSG00000185950	irs2a	IRS2	NA	NA	-0.945859	0.0245359	NA	NA	NA	NA	NA	NA	ortholog_one2many	41.3303	53.5853	0	82.97	1	ortholog
ENSDARG00000037108	ENSG00000204220	pfdn6	PFDN6	1.52436	2.39053e-05	NA	NA	NA	NA	NA	NA	NA	NA	ortholog_one2one	71.3178	73.0159	0	99.49	1	ortholog
ENSDARG00000037121	ENSG00000168906	mat2ab	MAT2A	-1.23262	0.0182788	NA	NA	-1.11658	3.39148e-06	NA	NA	NA	NA	ortholog_one2many	82.5316	89.8072	0	99.87	1	ortholog
ENSDARG00000037153	ENSG00000071553	atp6ap1b	ATP6AP1	1.45304	1.71998e-06	0.695888	0.00879163	NA	NA	-0.859619	9.21449e-05	-0.623789	0.000443431	ortholog_one2many	42.9787	44.0087	0	39.75	0	ortholog
ENSDARG00000037154	ENSG00000127124	hivep3b	HIVEP3	NA	NA	-1.0462	7.61015e-09	-0.845125	5.20961e-25	-1.29206	0.0133407	NA	NA	ortholog_one2many	32.0449	39.0578	0	49.85	0	ortholog
ENSDARG00000037158	ENSG00000180198	rcc1	RCC1	1.26034	7.231e-05	0.69063	0.00693022	NA	NA	1.88721	0.000132827	2.57495	3.9827e-22	ortholog_one2one	73.8717	74.4019	25	94.31	1	ortholog
ENSDARG00000037178	ENSG00000043355	zic2b	ZIC2	1.00373	0.0474943	1.88415	0.000550307	1.33584	5.88298e-06	NA	NA	NA	NA	ortholog_one2many	60.3383	75.1756	25	89.45	1	ortholog
ENSDARG00000037188	ENSG00000117748	rpa2	RPA2	0.890694	0.0217171	1.0216	0.000647421	NA	NA	NA	NA	0.648143	0.0122625	ortholog_one2one	54.4444	54.2435	0	69.69	1	ortholog
ENSDARG00000037195	ENSG00000165409	tshr	TSHR	NA	NA	-3.51352	0.020336	NA	NA	5.9082	1.58721e-06	3.88929	0.000275857	ortholog_one2one	57.199	57.7279	0	66.79	1	ortholog
ENSDARG00000037229	ENSG00000139726	denr	DENR	0.999954	0.00119769	NA	NA	NA	NA	NA	NA	NA	NA	ortholog_one2one	75.2525	71.6346	0	80.67	1	ortholog
ENSDARG00000037238	ENSG00000113658	smad5	SMAD5	1.18537	0.000247443	1.60971	1.60553e-07	0.886844	8.49402e-06	1.38071	5.49352e-08	1.14117	3.14442e-09	ortholog_one2one	90.7527	90.9483	25	100	1	ortholog
ENSDARG00000037259	ENSG00000165264	ndufb6	NDUFB6	0.948055	0.00329305	NA	NA	NA	NA	NA	NA	NA	NA	ortholog_one2one	53.9062	53.9062	0	55.63	1	ortholog
ENSDARG00000037261	ENSG00000099810	mtap	MTAP	1.28117	0.000752831	0.646489	0.0168409	NA	NA	0.810278	0.0467376	NA	NA	ortholog_one2many	78.7986	79.6429	0	87.37	1	ortholog
ENSDARG00000037307	ENSG00000113552	gnpda1	GNPDA1	3.87496	4.46393e-12	2.9177	6.60062e-11	0.816225	0.0227054	NA	NA	0.876695	3.90278e-05	ortholog_one2one	79.2388	83.2727	0	91.4	1	ortholog
ENSDARG00000037318	ENSG00000244038	ddost	DDOST	0.899142	1.16152e-13	0.639014	0.00280485	NA	NA	NA	NA	1.23109	1.66905e-08	ortholog_one2one	82.4601	82.0862	0	93.33	1	ortholog
ENSDARG00000037350	ENSG00000163682	rpl9	RPL9	1.25643	0.0155921	NA	NA	NA	NA	NA	NA	1.72342	0.000242186	ortholog_one2one	90.1042	90.1042	75	100	1	ortholog
ENSDARG00000037361	ENSG00000136240	kdelr2b	KDELR2	1.58056	5.25512e-05	0.67048	0.0119032	NA	NA	0.780578	0.0172802	1.73815	1.82645e-10	ortholog_one2many	93.3962	93.3962	0	94.65	1	ortholog
ENSDARG00000037363	ENSG00000166444	dennd2b	DENND2B	NA	NA	0.591919	0.0139449	NA	NA	0.679168	0.0240308	0.691763	0.00920278	ortholog_one2one	64.292	64.576	50	76.77	1	ortholog
ENSDARG00000037373	ENSG00000133216	ephb2a	EPHB2	-2.30809	8.72978e-05	NA	NA	NA	NA	NA	NA	NA	NA	ortholog_one2many	85.5984	83.1527	0	91.1	1	ortholog
ENSDARG00000037392	ENSG00000156603	med19a	MED19	1.02719	0.00365399	NA	NA	NA	NA	NA	NA	NA	NA	ortholog_one2many	62.7049	63.2231	25	56.51	1	ortholog
ENSDARG00000037393	ENSG00000149150	slc43a1a	SLC43A1	3.2971	0.000228242	2.06703	0.000456952	NA	NA	NA	NA	0.937456	0.00552856	ortholog_one2many	57.6029	60.0746	0	66.58	1	ortholog
ENSDARG00000037397	ENSG00000149136	ssrp1a	SSRP1	1.91181	1.64473e-16	1.25506	2.59795e-06	NA	NA	0.694458	0.000667374	0.630345	0.00131937	ortholog_one2many	69.1114	69.5035	0	83.27	1	ortholog
ENSDARG00000037403	ENSG00000109971	hspa8b	HSPA8	-1.35767	0.00217414	NA	NA	NA	NA	-0.682481	0.00888842	NA	NA	ortholog_one2many	93.1889	93.0448	0	100	1	ortholog
ENSDARG00000037408	ENSG00000175463	tbc1d10c	TBC1D10C	3.84835	0.000330688	1.22505	0.0168657	1.09339	0.0120607	NA	NA	NA	NA	ortholog_one2one	43.4978	14.0275	0	29.44	0	ortholog
ENSDARG00000037409	ENSG00000164124	tmem144a	TMEM144	0.813946	0.0190078	NA	NA	NA	NA	NA	NA	-2.66216	8.54962e-05	ortholog_one2many	63.4783	56.8831	50	48	1	ortholog
ENSDARG00000037411	ENSG00000164128	npy1r	NPY1R	-0.752867	0.0249445	NA	NA	NA	NA	-2.65474	0.00360129	-3.27009	7.79483e-05	ortholog_one2one	57.0312	57.6316	0	85.09	1	ortholog
ENSDARG00000037432	ENSG00000213397	haus7	HAUS7	1.34042	0.0133814	NA	NA	NA	NA	NA	NA	NA	NA	ortholog_one2one	29.0503	27.4406	25	0	0	ortholog
ENSDARG00000037476	ENSG00000120896	sorbs3	SORBS3	1.01181	0.018108	1.11043	0.000489358	NA	NA	1.17808	0.000143937	0.768389	0.00184722	ortholog_one2one	34.1282	37.1151	25	25.09	0	ortholog
ENSDARG00000037484	ENSG00000170088	tmem192	TMEM192	0.910288	7.14071e-06	NA	NA	NA	NA	NA	NA	NA	NA	ortholog_one2one	37.6384	37.6384	50	12.74	1	ortholog
ENSDARG00000037488	ENSG00000127022	canx	CANX	0.816293	5.06358e-05	0.713967	0.000353835	NA	NA	NA	NA	0.702004	0.000575226	ortholog_one2one	70.6081	69.6667	50	79.16	1	ortholog
ENSDARG00000037498	ENSG00000125675	gria3b	GRIA3	NA	NA	-0.617692	0.00576107	NA	NA	NA	NA	-1.47288	0.0016385	ortholog_one2many	86.3535	87.4292	25	72.76	1	ortholog
ENSDARG00000037517	ENSG00000080189	slc35c2	SLC35C2	1.30182	0.0191473	NA	NA	NA	NA	NA	NA	NA	NA	ortholog_one2one	64.1096	64.6409	0	77.77	1	ortholog
ENSDARG00000037555	ENSG00000168874	atoh8	ATOH8	NA	NA	-0.998567	7.47661e-06	NA	NA	3.40807	2.73449e-06	NA	NA	ortholog_one2one	39.2523	47.3684	25	39.5	0	ortholog
ENSDARG00000037570	ENSG00000186184	polr1d	POLR1D	1.32059	0.00429934	NA	NA	NA	NA	-0.741253	0.0122921	NA	NA	ortholog_one2one	55.6391	66.0714	0	68.72	1	ortholog
ENSDARG00000037593	ENSG00000163637	prickle2b	PRICKLE2	NA	NA	-0.68632	3.09618e-05	NA	NA	-1.02674	0.00359522	-1.60529	3.20517e-08	ortholog_one2many	66.9431	67.2619	100	94.83	1	ortholog
ENSDARG00000037607	ENSG00000197183	nol4lb	NOL4L	-2.03781	0.00757716	NA	NA	NA	NA	-0.938295	0.00293592	-1.47131	7.32875e-05	ortholog_one2one	42.3529	63.2967	50	74.04	1	ortholog
ENSDARG00000037618	ENSG00000168209	ddit4	DDIT4	1.10744	0.0131842	NA	NA	NA	NA	1.56696	0.00528712	1.19909	0.0242403	ortholog_one2one	45.2586	47.7273	75	51.83	1	ortholog
ENSDARG00000037640	ENSG00000178999	aurkb	AURKB	NA	NA	1.80253	1.23253e-05	NA	NA	5.00507	8.48154e-06	6.56121	9.2166e-36	ortholog_one2one	64.5349	69.375	25	80.32	1	ortholog
ENSDARG00000037654	ENSG00000140650	pmm2	PMM2	1.3181	0.00145488	0.717498	0.00711183	NA	NA	NA	NA	0.810755	0.00189551	ortholog_one2one	70.3252	69.2	0	86.58	1	ortholog
ENSDARG00000037655	ENSG00000102024	pls3	PLS3	1.25213	0.00806005	1.34253	0.00164286	NA	NA	NA	NA	NA	NA	ortholog_one2one	86.3492	86.7624	0	92.34	1	ortholog
ENSDARG00000037679	ENSG00000143158	MPC2	MPC2	-0.982836	0.031881	NA	NA	NA	NA	-0.929487	4.86907e-05	NA	NA	ortholog_one2many	68.5039	60.4167	0	58.5	1	ortholog
ENSDARG00000037706	ENSG00000100983	gss	GSS	-0.853503	0.00744867	NA	NA	NA	NA	NA	NA	NA	NA	ortholog_one2one	62.4473	62.3158	0	80.67	1	ortholog
ENSDARG00000037782	ENSG00000005513	sox8b	SOX8	NA	NA	NA	NA	0.997667	0.0374112	3.03243	5.31671e-06	NA	NA	ortholog_one2many	50.8969	63.764	0	97.29	1	ortholog
ENSDARG00000037783	ENSG00000126231	proza	PROZ	-0.833752	0.0346413	NA	NA	NA	NA	NA	NA	NA	NA	ortholog_one2many	33.75	31.6901	0	0	0	ortholog
ENSDARG00000037833	ENSG00000187098	mitfb	MITF	-1.70152	0.0105972	NA	NA	NA	NA	NA	NA	NA	NA	ortholog_one2many	62.5475	65.8	25	83.7	1	ortholog
ENSDARG00000037835	ENSG00000161980	polr3k	POLR3K	1.10816	0.0158297	NA	NA	NA	NA	NA	NA	NA	NA	ortholog_one2one	91.6667	91.6667	25	100	1	ortholog
ENSDARG00000037838	ENSG00000059145	unkl	UNKL	-0.58563	0.0418766	NA	NA	NA	NA	NA	NA	-0.910308	0.000380734	ortholog_one2one	65.8936	59.0465	0	75.8	1	ortholog
ENSDARG00000037846	ENSG00000101294	hm13	HM13	1.09664	0.000133203	NA	NA	NA	NA	NA	NA	1.16668	2.02642e-08	ortholog_one2one	65.9624	76.776	0	88.63	1	ortholog
ENSDARG00000037860	ENSG00000160471	cox6b2	COX6B2	1.13039	0.000618666	NA	NA	NA	NA	NA	NA	NA	NA	ortholog_many2many	54.5455	55.814	0	0	0	ortholog
ENSDARG00000037861	ENSG00000059804	slc2a3b	SLC2A3	NA	NA	-1.44957	9.65892e-05	-1.55141	1.48889e-09	-2.80921	2.39876e-05	-1.39668	0.0130626	ortholog_many2many	59.879	53.8043	0	0	0	ortholog
ENSDARG00000037870	ENSG00000184009	actb2	ACTG1	0.720423	0.00547732	0.830352	0.000447928	NA	NA	NA	NA	0.821828	0.000162297	ortholog_one2many	98.6667	98.6667	0	100	1	ortholog
ENSDARG00000037872	ENSG00000164916	foxk1	FOXK1	-1.25023	0.0177492	NA	NA	NA	NA	NA	NA	-0.924156	0.00442246	ortholog_one2one	60.3001	69.1706	75	64.81	1	ortholog
ENSDARG00000037879	ENSG00000106003	lfng	LFNG	0.647371	0.0369258	1.05987	5.90998e-07	0.777302	6.3719e-12	2.38138	0.00040157	2.67484	1.01172e-07	ortholog_one2one	61.7414	62.5668	50	72.28	1	ortholog
ENSDARG00000037883	ENSG00000137509	prcp	PRCP	NA	NA	0.64278	0.00300774	NA	NA	1.48532	0.000370345	1.94561	8.88001e-08	ortholog_one2one	58.871	59.5918	75	74.71	1	ortholog
ENSDARG00000037884	ENSG00000137502	rab30	RAB30	-1.67943	0.00829279	NA	NA	NA	NA	NA	NA	-0.937325	0.00166996	ortholog_one2one	84.7291	85.5721	50	100	1	ortholog
ENSDARG00000037891	ENSG00000108788	mlx	MLX	2.1249	3.61324e-06	1.60129	1.78584e-07	NA	NA	NA	NA	0.78434	0.000412765	ortholog_one2one	56.9672	60.4348	50	87.25	1	ortholog
ENSDARG00000037892	ENSG00000131470	psmc3ip	PSMC3IP	3.84969	0.0138593	2.72025	2.45019e-05	NA	NA	1.05413	0.00172101	1.2961	1.80561e-05	ortholog_one2one	61.7512	62.9108	75	95.74	1	ortholog
ENSDARG00000037895	ENSG00000131477	ramp2	RAMP2	2.34145	0.00888683	NA	NA	1.04782	0.000324414	1.13992	0.00780246	1.29438	0.000728621	ortholog_one2one	21.1429	17.9612	50	0	0	ortholog
ENSDARG00000037916	ENSG00000176749	cdk5r1a	CDK5R1	-2.14197	0.00572722	NA	NA	NA	NA	-1.91618	0.00134943	-3.22831	3.46415e-09	ortholog_one2many	66.1238	66.3399	0	100	1	ortholog
ENSDARG00000037921	ENSG00000127588	gng13b	GNG13	NA	NA	-0.628935	0.0015802	-0.808458	1.70411e-11	-2.747	0.0148459	-3.88728	6.7909e-08	ortholog_one2one	74.6269	74.6269	0	100	1	ortholog
ENSDARG00000037924	ENSG00000120063	gna13b	GNA13	NA	NA	1.09099	8.98863e-07	0.627248	1.61272e-06	1.24449	2.71145e-05	0.854518	3.74725e-05	ortholog_one2many	83.8196	83.8196	25	100	1	ortholog
ENSDARG00000037932	ENSG00000104863	lin7b	LIN7B	7.57979	0.00269975	NA	NA	NA	NA	-1.61403	0.000155799	-1.52367	3.26481e-05	ortholog_one2one	89.8551	84.5455	0	75.56	1	ortholog
ENSDARG00000037954	ENSG00000105048	tnnt1	TNNT1	2.86341	0.00519328	NA	NA	NA	NA	NA	NA	-2.61255	0.00189282	ortholog_one2one	60.4317	49.1228	0	55.65	1	ortholog
ENSDARG00000037955	ENSG00000104872	pih1d1	PIH1D1	1.18703	0.0248845	NA	NA	NA	NA	NA	NA	NA	NA	ortholog_one2one	36.2069	36.5854	25	0	0	ortholog
ENSDARG00000037962	ENSG00000136930	psmb7	PSMB7	1.5202	6.50541e-07	NA	NA	NA	NA	NA	NA	NA	NA	ortholog_one2one	78.3393	78.3393	50	85.7	1	ortholog
ENSDARG00000037963	ENSG00000119408	nek6	NEK6	1.52016	0.0446341	1.14519	0.000270881	NA	NA	NA	NA	1.47039	0.00030929	ortholog_one2one	71.885	83.3333	75	74	1	ortholog
ENSDARG00000037966	ENSG00000131652	thoc6	THOC6	1.14177	0.00123213	NA	NA	NA	NA	NA	NA	0.863756	8.97097e-05	ortholog_one2one	55.7185	58.8235	0	61.52	1	ortholog
ENSDARG00000037997	ENSG00000196230	tubb5	TUBB	1.20611	0.000192852	1.56594	4.03106e-13	1.82503	1.6979e-23	NA	NA	1.03567	0.00012262	ortholog_one2one	98.6487	98.6487	25	0	0	ortholog
ENSDARG00000038010	ENSG00000128340	rac2	RAC2	4.77574	1.34668e-29	3.52181	6.62487e-17	0.967353	0.00650061	NA	NA	2.07018	8.09793e-06	ortholog_one2one	92.7083	81.2785	25	30.77	0	ortholog
ENSDARG00000038028	ENSG00000184983	ndufa6	NDUFA6	1.13352	0.0162563	NA	NA	NA	NA	NA	NA	NA	NA	ortholog_one2one	67.1875	67.1875	25	100	1	ortholog
ENSDARG00000038030	ENSG00000100387	rbx1	RBX1	1.23518	0.0016882	NA	NA	NA	NA	NA	NA	NA	NA	ortholog_one2one	98.1481	98.1481	50	96.06	1	ortholog
ENSDARG00000038066	ENSG00000182481	kpna2	KPNA2	2.253	0.000686576	2.9358	9.59582e-11	NA	NA	NA	NA	1.18804	1.6754e-06	ortholog_one2one	73.724	74.2857	25	89.73	1	ortholog
ENSDARG00000038068	ENSG00000108654	ddx5	DDX5	1.71662	4.38855e-06	NA	NA	NA	NA	NA	NA	NA	NA	ortholog_one2one	75.57	75.2026	25	90.57	1	ortholog
ENSDARG00000038072	ENSG00000251692	ptx4	PTX4	NA	NA	-1.34877	0.0414518	NA	NA	NA	NA	NA	NA	ortholog_one2one	33.8912	30.5085	25	48.29	0	ortholog
ENSDARG00000038074	ENSG00000125991	ergic3	ERGIC3	0.72242	0.00131534	NA	NA	NA	NA	0.827595	0.0003676	1.56035	4.12087e-10	ortholog_one2one	87.4674	86.3402	0	100	1	ortholog
ENSDARG00000038075	ENSG00000179091	cyc1	CYC1	0.631966	0.0139967	NA	NA	NA	NA	NA	NA	NA	NA	ortholog_one2one	67.0769	71.0098	0	87.61	1	ortholog
ENSDARG00000038095	ENSG00000185338	socs1a	SOCS1	2.42555	0.00652719	2.70207	3.1649e-08	NA	NA	NA	NA	3.32525	8.46774e-09	ortholog_one2one	37.9147	39.801	50	100	1	ortholog
ENSDARG00000038106	ENSG00000137700	slc37a4a	SLC37A4	1.26868	0.0392946	NA	NA	NA	NA	NA	NA	NA	NA	ortholog_one2one	73.6597	73.6597	25	94.4	1	ortholog
ENSDARG00000038123	ENSG00000101335	myl9a	MYL9	2.66734	1.17014e-07	1.88664	4.15272e-05	NA	NA	NA	NA	1.70002	0.00356744	ortholog_one2many	93.0233	91.954	0	99.15	1	ortholog
ENSDARG00000038156	ENSG00000144048	dusp11	DUSP11	0.610602	0.0296653	NA	NA	NA	NA	NA	NA	0.731635	0.00333583	ortholog_one2one	31.8302	36.5854	0	36.88	0	ortholog
ENSDARG00000038159	ENSG00000152284	tcf7l1a	TCF7L1	NA	NA	0.715112	0.00646545	0.689798	2.3948e-05	2.55674	4.31628e-09	1.98571	4.30301e-07	ortholog_one2many	69.898	73.3929	0	87.15	1	ortholog
ENSDARG00000038207	ENSG00000159423	aldh4a1	ALDH4A1	-1.52755	3.47926e-05	NA	NA	-0.662824	4.17067e-09	NA	NA	NA	NA	ortholog_one2one	72.8242	73.741	25	91.06	1	ortholog
ENSDARG00000038213	ENSG00000121073	slc35b1	SLC35B1	0.789777	0.000984974	NA	NA	NA	NA	NA	NA	NA	NA	ortholog_one2one	72.9814	71.4286	75	96.43	1	ortholog
ENSDARG00000038225	ENSG00000213281	nras	NRAS	0.839612	0.00559701	NA	NA	NA	NA	NA	NA	0.868565	8.27886e-06	ortholog_one2one	90.4762	90.9574	50	9.51	1	ortholog
ENSDARG00000038278	ENSG00000160013	ptgir	PTGIR	NA	NA	1.52208	8.34653e-06	NA	NA	NA	NA	1.33832	0.0145024	ortholog_one2one	44.8187	47.5275	25	81.72	1	ortholog
ENSDARG00000038290	ENSG00000100296	thoc5	THOC5	0.624882	0.0261471	NA	NA	NA	NA	NA	NA	NA	NA	ortholog_one2one	68.2284	68.1287	0	90.79	1	ortholog
ENSDARG00000038312	ENSG00000120158	rcl1	RCL1	0.964206	0.027369	NA	NA	NA	NA	NA	NA	NA	NA	ortholog_one2one	74.7989	76.0218	0	82.06	1	ortholog
ENSDARG00000038359	ENSG00000132199	enosf1	ENOSF1	1.21544	0.000425233	0.691222	0.0351419	NA	NA	NA	NA	NA	NA	ortholog_one2one	72.4605	72.7891	0	86.07	1	ortholog
ENSDARG00000038360	ENSG00000113272	thg1l	THG1L	0.833719	0.0172012	NA	NA	NA	NA	0.807772	0.00355469	0.820153	2.36004e-05	ortholog_one2one	63.4228	63.6364	0	90.72	1	ortholog
ENSDARG00000038386	ENSG00000139352	ascl1a	ASCL1	NA	NA	1.0031	0.00229866	1.01459	4.33955e-05	3.12006	4.47773e-09	2.31058	0.000412765	ortholog_many2many	71.6102	86.2245	0	82.42	1	ortholog
ENSDARG00000038398	ENSG00000100417	pmm1	PMM1	-2.77518	0.00127274	NA	NA	NA	NA	NA	NA	NA	NA	ortholog_one2many	55.3435	71.7822	0	56.52	1	ortholog
ENSDARG00000038424	ENSG00000224389	c4b	C4B	3.64253	1.61808e-07	3.45005	1.5281e-51	1.90447	0.000123101	NA	NA	NA	NA	ortholog_one2many	33.1995	33.5652	25	0	0	ortholog
ENSDARG00000038429	ENSG00000144655	csrnp1b	CSRNP1	NA	NA	-0.990428	5.9428e-07	-1.24579	1.14711e-21	NA	NA	NA	NA	ortholog_one2many	41.5959	43.2862	0	82.3	1	ortholog
ENSDARG00000038445	ENSG00000134278	spire1b	SPIRE1	-2.07917	0.000293358	NA	NA	NA	NA	NA	NA	NA	NA	ortholog_one2many	44.4444	69.7095	0	58.11	1	ortholog
ENSDARG00000038456	ENSG00000061794	mrps35	MRPS35	0.8112	0.0141881	NA	NA	NA	NA	NA	NA	NA	NA	ortholog_one2one	58.2043	56.9697	0	80.48	1	ortholog
ENSDARG00000038465	ENSG00000197457	stmn3	STMN3	-1.34218	0.0133341	-0.77631	0.00287743	NA	NA	-1.20476	0.00143581	-1.54225	7.13175e-06	ortholog_one2one	66.1111	65.7459	50	92.32	1	ortholog
ENSDARG00000038489	ENSG00000156966	b3gnt7	B3GNT7	NA	NA	2.11307	0.00152213	2.04595	2.61493e-06	NA	NA	NA	NA	ortholog_one2one	55.8603	53.5885	0	82.82	1	ortholog
ENSDARG00000038505	ENSG00000163882	polr2h	POLR2H	1.08121	0.00280312	NA	NA	NA	NA	NA	NA	0.805457	0.000664824	ortholog_one2one	96.6667	96.6667	25	100	1	ortholog
ENSDARG00000038557	ENSG00000168096	anks3	ANKS3	1.75698	8.42037e-05	0.906862	5.58577e-05	0.664539	0.0157692	NA	NA	NA	NA	ortholog_one2one	50.3049	53.0547	0	57.15	1	ortholog
ENSDARG00000038563	ENSG00000107959	pitrm1	PITRM1	NA	NA	0.657856	0.02321	NA	NA	-0.780226	0.00571964	-1.39675	2.73339e-09	ortholog_one2one	66.5381	67.4487	25	89.37	1	ortholog
ENSDARG00000038608	ENSG00000143252	sdhc	SDHC	0.868024	0.00317129	NA	NA	NA	NA	NA	NA	NA	NA	ortholog_one2one	58.5799	58.5799	0	53.16	1	ortholog
ENSDARG00000038615	ENSG00000165782	pip4p1a	PIP4P1	-0.704379	0.000618144	NA	NA	NA	NA	-0.755418	6.17064e-05	-0.920428	9.154e-07	ortholog_one2many	70.7581	72.5926	0	73.14	1	ortholog
ENSDARG00000038635	ENSG00000162385	magoh	MAGOH	1.17292	0.00158179	NA	NA	NA	NA	NA	NA	0.778523	0.000411792	ortholog_one2many	98.6301	97.9592	25	98.36	1	ortholog
ENSDARG00000038655	ENSG00000196581	ajap1	AJAP1	-1.26573	0.0207225	NA	NA	NA	NA	-2.161	0.0135824	-4.4849	4.91443e-11	ortholog_one2one	43.7956	46.875	50	34.06	1	ortholog
ENSDARG00000038669	ENSG00000162645	gbp2	GBP2	2.99862	0.000141521	3.61054	5.00731e-24	0.966195	0.0387415	2.3649	0.0207	3.08096	3.00739e-10	ortholog_one2one	43.9932	41.4673	0	0.77	0	ortholog
ENSDARG00000038693	ENSG00000176533	gng7	GNG7	-0.933805	1.52043e-07	NA	NA	NA	NA	NA	NA	-1.27288	0.0131043	ortholog_one2one	94.1176	94.1176	25	100	1	ortholog
ENSDARG00000038703	ENSG00000156510	hkdc1	HKDC1	1.19151	0.0374316	NA	NA	NA	NA	2.04962	0.0175616	1.73873	0.00919646	ortholog_one2one	74.8092	74.6464	100	85.69	1	ortholog
ENSDARG00000038709	ENSG00000179820	MYADM	MYADM	NA	NA	1.42284	0.0418689	NA	NA	-1.52861	0.00393709	NA	NA	ortholog_one2many	45.6522	50.1706	0	90.35	1	ortholog
ENSDARG00000038754	ENSG00000173846	plk3	PLK3	NA	NA	-1.51367	1.03055e-13	-1.36966	1.31203e-15	NA	NA	NA	NA	ortholog_one2one	56.3467	55.1515	0	75.28	1	ortholog
ENSDARG00000038768	ENSG00000262814	mrpl12	MRPL12	1.10889	0.00082571	NA	NA	NA	NA	NA	NA	NA	NA	ortholog_one2one	55.5556	55.2764	25	75.78	1	ortholog
ENSDARG00000038785	ENSG00000033050	abcf2a	ABCF2	NA	NA	NA	NA	-0.690338	1.1048e-09	NA	NA	NA	NA	ortholog_many2many	85.3933	86.7863	25	91.11	1	ortholog
ENSDARG00000038786	ENSG00000082014	smarcd3a	SMARCD3	-0.728741	0.0495041	NA	NA	NA	NA	NA	NA	NA	NA	ortholog_one2many	83.4369	84.8421	25	97.14	1	ortholog
ENSDARG00000038788	ENSG00000122735	dnai1.2	DNAI1	NA	NA	1.80835	0.00107991	NA	NA	NA	NA	NA	NA	ortholog_one2many	55.5079	58.7879	0	83.72	1	ortholog
ENSDARG00000038789	ENSG00000126106	tmem53	TMEM53	0.823979	0.000856891	NA	NA	NA	NA	NA	NA	NA	NA	ortholog_one2one	47.2924	46.6192	0	80.88	1	ortholog
ENSDARG00000038802	ENSG00000120334	cenpl	CENPL	NA	NA	1.45525	0.00021396	NA	NA	NA	NA	1.88863	4.38858e-11	ortholog_one2one	37.7907	37.037	25	66.04	1	ortholog
ENSDARG00000038812	ENSG00000133740	e2f5	E2F5	2.20674	0.00254353	1.08322	0.0161579	NA	NA	1.33098	1.68767e-05	1.57044	6.91634e-09	ortholog_one2one	55.7803	53.168	25	63.44	1	ortholog
ENSDARG00000038822	ENSG00000260314	mrc1b	MRC1	3.17715	6.10101e-32	3.24768	6.39943e-20	1.00162	1.05334e-13	NA	NA	2.04668	0.0411767	ortholog_one2many	39.011	39.7759	0	15.48	0	ortholog
ENSDARG00000038826	ENSG00000104369	jph1b	JPH1	-1.00489	4.0879e-10	NA	NA	NA	NA	-2.73711	0.00345558	-2.59589	0.000230151	ortholog_one2many	68.9864	67.7563	100	91.81	1	ortholog
ENSDARG00000038835	ENSG00000171497	ppid	PPID	0.711229	0.0412694	NA	NA	NA	NA	-0.675633	0.00195958	-0.587998	0.000384644	ortholog_one2one	71.6216	71.4286	75	89.41	1	ortholog
ENSDARG00000038847	ENSG00000181938	gins3	GINS3	1.54131	0.0367419	1.39213	0.00248948	NA	NA	2.02399	4.44314e-05	1.85719	3.29243e-10	ortholog_one2one	65.2778	66.8246	25	85.74	1	ortholog
ENSDARG00000038878	ENSG00000168811	il12a	IL12A	4.84748	0.0184067	NA	NA	NA	NA	1.29415	0.0378733	NA	NA	ortholog_one2many	16.2055	20.9184	100	0	0	ortholog
ENSDARG00000038881	ENSG00000167315	acaa2	ACAA2	NA	NA	0.804758	1.97716e-07	NA	NA	NA	NA	0.75618	0.0311476	ortholog_one2many	77.0781	77.0781	0	98.03	1	ortholog
ENSDARG00000038882	ENSG00000113810	smc4	SMC4	NA	NA	2.82417	2.73031e-15	1.22331	6.79702e-07	1.49069	0.0395859	2.35885	3.82236e-11	ortholog_one2one	68.0901	68.0372	75	79.34	1	ortholog
ENSDARG00000038918	ENSG00000184845	drd1b	DRD1	-1.65176	0.0154263	NA	NA	NA	NA	-3.41333	0.0027809	-4.98916	2.05867e-09	ortholog_one2one	71.7489	71.7489	0	98.03	1	ortholog
ENSDARG00000038978	ENSG00000162616	dnajb4	DNAJB4	-0.924177	7.90417e-05	-0.886561	6.86185e-07	-0.830341	9.60437e-33	NA	NA	NA	NA	ortholog_one2one	69.4362	68.8235	25	79.41	1	ortholog
ENSDARG00000038980	ENSG00000117862	txndc12	TXNDC12	1.49843	0.00102018	NA	NA	NA	NA	NA	NA	1.18538	2.64666e-08	ortholog_one2one	70.3488	70.3488	0	81.41	1	ortholog
ENSDARG00000038981	ENSG00000151967	zgc:153615	SCHIP1	-0.832421	0.0360412	NA	NA	NA	NA	NA	NA	NA	NA	ortholog_many2many	72.9508	68.9922	25	91.61	1	ortholog
ENSDARG00000039007	ENSG00000108515	eno3	ENO3	2.59356	1.28135e-08	2.2711	7.89156e-07	1.10087	1.67034e-07	1.38201	0.0106801	1.17469	0.00923731	ortholog_one2one	85.4839	85.6813	0	95.2	1	ortholog
ENSDARG00000039020	ENSG00000112029	fbxo5	FBXO5	NA	NA	2.49337	1.09461e-05	1.29519	0.0417757	1.55877	0.00194679	2.39797	9.03905e-14	ortholog_one2one	26.1745	30.4688	25	0	0	ortholog
ENSDARG00000039069	ENSG00000149346	slx4ip	SLX4IP	NA	NA	1.41082	0.00159911	NA	NA	0.686296	0.0027809	NA	NA	ortholog_one2one	29.6569	24.2485	50	0	0	ortholog
ENSDARG00000039117	ENSG00000167074	tefa	TEF	-1.46669	1.51458e-10	NA	NA	-0.850502	8.57563e-35	-1.43408	0.00321607	-3.07895	9.5514e-18	ortholog_one2many	51.8152	52.3333	50	66.59	1	ortholog
ENSDARG00000039123	ENSG00000100505	trim9	TRIM9	-0.939443	1.1123e-05	NA	NA	NA	NA	NA	NA	NA	NA	ortholog_one2one	73.2076	83.2618	100	91.29	1	ortholog
ENSDARG00000039125	ENSG00000012983	map4k5	MAP4K5	1.20603	0.00240779	0.839023	0.000274932	NA	NA	NA	NA	-0.771316	0.0136299	ortholog_one2one	77.896	75.0569	100	75.78	1	ortholog
ENSDARG00000039133	ENSG00000091128	lamb4	LAMB4	NA	NA	3.47535	4.31177e-06	NA	NA	2.25026	0.0189828	3.25695	8.72279e-09	ortholog_one2one	43.3844	41.8172	0	29.96	0	ortholog
ENSDARG00000039142	ENSG00000162704	arpc5a	ARPC5	1.15045	1.18249e-05	0.998931	0.00407856	NA	NA	NA	NA	0.860517	0.00654246	ortholog_one2many	83.4437	84	0	100	1	ortholog
ENSDARG00000039150	ENSG00000100600	lgmn	LGMN	2.89644	4.92933e-14	1.41367	0.0003128	NA	NA	NA	NA	NA	NA	ortholog_one2one	64.6651	63.9269	0	83.96	1	ortholog
ENSDARG00000039152	ENSG00000153832	fbxo36b	FBXO36	NA	NA	1.14539	0.030956	NA	NA	0.787282	0.0307664	NA	NA	ortholog_one2many	52.1277	49.4949	0	0	0	ortholog
ENSDARG00000039174	ENSG00000118733	olfm3b	OLFM3	2.53391	0.000670994	1.05139	0.00293979	0.647106	0.0211778	-3.22469	0.0119612	-4.74714	5.68763e-08	ortholog_one2many	79.476	83.6782	25	74.51	1	ortholog
[truncated: 7,138 more rows]
