# Supplementary material for: Brain Regeneration Resembles Brain Cancer at Its Early Wound Healing Stage and Diverges From Cancer Later at Its Proliferation and Differentiation Stages
Source: Front Cell Dev Biol. 2022 Feb 10;10:813314. doi: 10.3389/fcell.2022.813314 (PMC8868567; doi:10.3389/fcell.2022.813314)
Supplement: Supplementary file 10 [file Table8.XLSX]

## Sheet: 1dpl-LGG_shared_genes
Supplementary Table 8: Most significantly enriched GO-BP (top 200), CC (top 50), and MF (top 50) terms based on transcriptional changes in comparison of three different stages of zebrafish brain regeneration with LGG (E) and GBM (F) by using human identifiers of shared DEGs.
Category	Term	Count	PValue	log10(Pvalue)	Genes	List.Total	Pop.Hits	Pop.Total	Fold.Enrichment	Benjamini	FDR
GOTERM_BP	GO:0072599~establishment of protein localization to endoplasmic reticulum	60	7.34502e-36	-35.134	RPS8, RPS13, SEC61B, RPLP2, RPS7, SRP19, RPL13A, RPS9, RPS16, RPL34, RPL13, RPL23, RPS24, RPL35, FAU, RPSA, RPS28, RPL12, RPS6, RPS18, RPL19, RPL29, RPS14, RPL21, RPS11, RPL35A, RPS3, RPL23A, RPL27, RPL37, RPS12, RPL17, RPL37A, SEC61A1, RPL39, RPS10, RPL6, RPL30, RPS2, RPS23, RPL18, RPS19, RPL14, RPLP1, RPS4X, RPS25, RPS5, RPL4, RPL10A, RPS3A, RPL7, RPL22, RPL24, RPL3, RPL5, RPLP0, RPS17, RPL10, …	1325	108	16130	6.7631	3.27661e-32	3.12457e-32
GOTERM_BP	GO:0006612~protein targeting to membrane	76	6.04361e-33	-32.2187	MYADM, RPS8, RPS13, SEC61B, RPLP2, RPS7, SRP19, RPL13A, RPS9, RPS16, RPL34, RPL13, EHD3, RPL23, TRAM1, RPS24, SPTBN1, RPL35, FAU, RPSA, RPS28, RPL12, RPS6, RPS18, RPL19, KCNB2, CHP1, RPL29, RPS14, RPL21, RPS11, RPL35A, RPS3, RPL23A, RPL27, RPL37, ANK3, RPS12, RPL17, RPL37A, SEC61A1, MIEF2, RPL39, RPS10, RPL6, RPL30, RPS2, RPS23, RPL18, RPS19, TESC, RPL14, RPLP1, RPS4X, GOLGA7B, RPS25, RPS5, RPL4,…	1325	190	16130	4.86943	1.34803e-29	1.28548e-29
GOTERM_BP	GO:0090150~establishment of protein localization to membrane	106	2.57652e-31	-30.589	MYADM, RPS8, RPS13, TMEM150A, SRP19, RPL13A, RPS16, EHD3, TFDP1, TRAM1, RPS24, SPTBN1, RPL35, RPSA, RPL19, KCNB2, CHP1, RPS14, RPL21, RPS11, RPS3, RPL23A, RPL27, RPL37, RPL17, SEC61A1, MIEF2, EFR3B, RPL39, RPL30, RPS2, RPL18, RPS19, TESC, CNST, RPL14, GOLGA7B, RPS5, RPL4, RPL10A, CDK5R1, RPL22, CIB1, RPL5, RPLP0, RPL10, RPL18A, ROCK2, SYS1, SEC61B, VAMP3, PPP2R5A, RPLP2, RPS7, RPS9, CLIP3, RPL34,…	1325	368	16130	3.50652	3.83128e-28	3.6535e-28
GOTERM_BP	GO:0072657~protein localization to membrane	124	9.25915e-31	-30.0334	MYADM, FGF13, RPS8, RPS13, TMEM150A, MYO5A, SRP19, RPL13A, RPS16, EHD3, APOE, TFDP1, TRAM1, RPS24, SPTBN1, DLG2, RPL35, PRKCZ, RPSA, RPL19, KCNB2, CHP1, RPS14, RPL21, RPS11, RPS3, RPL23A, RPL27, RPL37, RPL17, SEC61A1, MIEF2, EFR3B, RPL39, SHANK3, NLGN1, RPL30, RPS2, RPL18, RPS19, TESC, CNST, RPL14, RAMP2, GOLGA7B, RPS5, RPL4, RPL10A, CDK5R1, RPL22, CIB1, RPL5, RPLP0, RPL10, RPL18A, ROCK2, SYS1, L…	1325	489	16130	3.08696	1.03263e-27	9.8471e-28
GOTERM_BP	GO:0019080~viral gene expression	67	4.38209e-25	-24.3583	RPS8, RPS13, RPLP2, RPS7, TRIM32, RPL13A, RPS9, NUP35, RPS16, NOTCH1, RPL34, RPL13, RPL23, NUP37, RPS24, RPL35, FAU, RPSA, RPS28, RPL12, RPS6, RPS18, RPL19, RPL29, RPS14, RPL21, RPS11, EIF3F, AAAS, RPL35A, RPS3, RPL23A, RPL27, EIF3G, RPL37, RPS12, RPL17, RPL37A, RPL39, RPS10, RPL6, RPL30, RPS2, RPS23, RPL18, RPS19, NUP43, RPL14, RPLP1, RPS4X, PFN1, RPS25, RPS5, RPL4, RPL10A, RPS3A, RPL7, RPL22, R…	1325	192	16130	4.24807	3.9097e-22	3.72828e-22
GOTERM_BP	GO:0019083~viral transcription	64	2.44236e-24	-23.6122	RPS8, RPS13, RPLP2, RPS7, TRIM32, RPL13A, RPS9, NUP35, RPS16, NOTCH1, RPL34, RPL13, RPL23, NUP37, RPS24, RPL35, FAU, RPSA, RPS28, RPL12, RPS6, RPS18, RPL19, RPL29, RPS14, RPL21, RPS11, AAAS, RPL35A, RPS3, RPL23A, RPL27, RPL37, RPS12, RPL17, RPL37A, RPL39, RPS10, RPL6, RPL30, RPS2, RPS23, RPL18, RPS19, NUP43, RPL14, RPLP1, RPS4X, PFN1, RPS25, RPS5, RPL4, RPL10A, RPS3A, RPL7, RPL22, RPL24, RPL3, RP…	1325	181	16130	4.30447	1.8159e-21	1.73164e-21
GOTERM_BP	GO:0015031~protein transport	273	1.76121e-23	-22.7542	TBC1D22B, F2R, MYADM, RPS13, LMAN2L, CD276, CNR1, DENND1A, RPL13A, NUP35, DNAJC1, RAB36, NOTCH1, TNFSF13B, GDAP1, CEP131, VIP, EHD3, KPNA6, APOE, TGFBR1, UHMK1, MDFI, NUP37, CACNA1E, RPSA, ARL4D, PCLO, TOMM20, RPL19, KCNB2, CHP1, RPS14, RPL21, RPS11, AAAS, RPS3, ACTL6A, SEMA5A, RPL23A, SNX18, RPL37, STX1B, SEC61A1, MIEF2, TBC1D30, RPL39, HID1, RPL30, RPL18, RPS19, HSPA8, CNST, GOLGA7B, NMD3, VSNL…	1325	1860	16130	1.78677	1.12239e-20	1.07031e-20
GOTERM_BP	GO:0006401~RNA catabolic process	74	7.28936e-23	-22.1373	RPS8, RPS13, ERI1, NCBP2, RPLP2, RPS7, NOCT, PPP2CA, RPL13A, RPS9, CTIF, XRN2, RPS16, RPL34, RPL13, RPL23, UHMK1, RPS24, RPL35, EIF4E, FAU, RPSA, RPS28, RPL12, RPS6, RPS18, EIF4B, RPL19, RPL29, RPS14, RPL21, RPS11, LSM5, RPL35A, RPS3, RPL23A, RPL27, RPL37, RNASEH2A, RPS12, EIF3E, RBM8A, RPL17, RPL37A, EXOSC8, RPL39, ZFP36L2, RPS10, RPL6, RPL30, RPS2, RPS23, RPL18, RPS19, RPL14, CPEB3, RPLP1, RPS4…	1325	249	16130	3.61785	4.06473e-20	3.87612e-20
GOTERM_BP	GO:0006364~rRNA processing	75	2.37879e-21	-20.6236	TSR2, RPS8, RPS13, ERI1, RPLP2, RPS7, RPL13A, RPS9, XRN2, RPS16, RPL34, RPL13, RPL23, RPS24, RPL35, FAU, RPSA, RPS28, RPL12, FCF1, RPS6, SNU13, RPS18, EMG1, RPL19, RPL29, RPS14, RPL21, RPS11, RPL35A, RPS3, RPL23A, RPL27, RPL37, RPS12, RPL17, RPL37A, EXOSC8, RPL39, RPS10, RPL6, METTL16, RPL30, RPS2, RRS1, RPS23, RPL18, RPS19, GAR1, FDXACB1, RPL14, RPLP1, FBL, RPS4X, RPS25, DDX52, NOP2, RPS5, RPL4,…	1325	269	16130	3.39412	1.17909e-18	1.12438e-18
GOTERM_BP	GO:0048666~neuron development	164	5.31608e-20	-19.2744	SYT3, ACSL4, FGF13, KRAS, SLITRK4, CAMSAP1, KIRREL3, SEMA6B, PAK2, MAPK8IP2, RTN4, TRPV4, CNR1, GRIP1, TRIM32, BAIAP2, SEMA4B, CAMK1, NOTCH1, PLXNA3, CPNE1, EFNA5, AMIGO1, APOE, UHMK1, TSKU, SF3A2, BCL11B, SPTBN1, GFAP, B3GNT2, UNC5A, PLPPR4, PRKCZ, WEE1, RASGRF1, SEPTIN2, KALRN, CPNE9, HCN1, ADCY1, SEMA5A, NEURL1, STX1B, SIPA1L1, MRTFA, TNC, IFRD1, FKBP4, SHANK3, NLGN1, DPYSL2, EZH2, CPNE5, PLK2…	1325	965	16130	2.06888	2.3715e-17	2.26146e-17
GOTERM_BP	GO:0031175~neuron projection development	146	7.69972e-20	-19.1135	SYT3, ACSL4, FGF13, KRAS, SLITRK4, CAMSAP1, KIRREL3, SEMA6B, PAK2, MAPK8IP2, RTN4, TRPV4, CNR1, GRIP1, TRIM32, BAIAP2, SEMA4B, CAMK1, NOTCH1, PLXNA3, CPNE1, EFNA5, AMIGO1, APOE, UHMK1, TSKU, SF3A2, BCL11B, SPTBN1, GFAP, B3GNT2, UNC5A, PLPPR4, PRKCZ, WEE1, RASGRF1, SEPTIN2, KALRN, CPNE9, ADCY1, SEMA5A, NEURL1, STX1B, SIPA1L1, MRTFA, TNC, IFRD1, FKBP4, SHANK3, NLGN1, DPYSL2, EZH2, CPNE5, PLK2, NUMB…	1325	817	16130	2.17545	3.12259e-17	2.97769e-17
GOTERM_BP	GO:0030182~neuron differentiation	193	1.07891e-19	-18.967	SYT3, FGF13, CAMSAP1, KRAS, PAK2, CNR1, GRIP1, TRIM32, SEMA4B, XRN2, NOTCH1, APOE, TGFBR1, UHMK1, BCL11B, GFAP, B3GNT2, UNC5A, EIF4E, ZEB1, SEPTIN2, HCN1, SEMA5A, STX1B, TNC, SHANK3, DPYSL2, EZH2, CPNE5, NUMBL, HIPK2, APP, GSDME, NCK1, PRRX1, GNAO1, CIB1, TBC1D24, SRCIN1, HMGB1, PPP1R9A, RAP1GAP, STMN4, ZNF335, CTNNA1, STXBP1, DAG1, APBB1, STAT3, BMP2, ID1, CAMK2B, ETV4, PPP1R9B, MEGF8, SPTBN2, D…	1325	1226	16130	1.9164	4.01087e-17	3.82475e-17
GOTERM_BP	GO:0099537~trans-synaptic signaling	118	3.7108e-19	-18.4305	DNAJC5, SYT3, KRAS, EGR3, MAPK8IP2, MYO5A, CNR1, BAIAP2, GABRD, USP14, IQSEC2, SCN2B, APOE, SLC8A2, GFAP, CACNA1E, CHRM2, OPRM1, DLG2, JPH3, ADGRL1, PRKCZ, PCLO, CPLX2, SYNJ1, PNKD, RASGRF1, PIP5K1C, NAPB, KALRN, GPR52, SNAP47, NEURL1, RIN1, STX1B, SIPA1L1, NISCH, SHANK3, NLGN1, GRM5, HSPA8, PLK2, CHRM3, KCNN1, NAPA, GABBR2, DNM1, RAB3A, NOVA1, GRM2, KCNQ2, CLSTN1, PPFIA4, PDYN, DOC2B, GABRB2, SH…	1325	604	16130	2.37828	1.18242e-16	1.12755e-16
GOTERM_BP	GO:0099536~synaptic signaling	118	3.7108e-19	-18.4305	DNAJC5, SYT3, KRAS, EGR3, MAPK8IP2, MYO5A, CNR1, BAIAP2, GABRD, USP14, IQSEC2, SCN2B, APOE, SLC8A2, GFAP, CACNA1E, CHRM2, OPRM1, DLG2, JPH3, ADGRL1, PRKCZ, PCLO, CPLX2, SYNJ1, PNKD, RASGRF1, PIP5K1C, NAPB, KALRN, GPR52, SNAP47, NEURL1, RIN1, STX1B, SIPA1L1, NISCH, SHANK3, NLGN1, GRM5, HSPA8, PLK2, CHRM3, KCNN1, NAPA, GABBR2, DNM1, RAB3A, NOVA1, GRM2, KCNQ2, CLSTN1, PPFIA4, PDYN, DOC2B, GABRB2, SH…	1325	604	16130	2.37828	1.18242e-16	1.12755e-16
GOTERM_BP	GO:0022008~neurogenesis	213	2.82339e-18	-17.5492	SYT3, FGF13, CAMSAP1, KRAS, PAK2, CNR1, GRIP1, TRIM32, SEMA4B, CXCR4, XRN2, NOTCH1, PRMT5, APOE, TGFBR1, UHMK1, BCL11B, GFAP, B3GNT2, UNC5A, EIF4E, MMP14, SYNJ1, ZEB1, SEPTIN2, HMGB2, HCN1, SEMA5A, CDK6, STX1B, TNC, MYC, SHANK3, DPYSL2, BTBD6, EZH2, CPNE5, NUMBL, HIPK2, APP, GSDME, NCK1, NAB1, PRRX1, GNAO1, CIB1, TBC1D24, SRCIN1, HMGB1, PPP1R9A, RAP1GAP, STMN4, ZNF335, CTNNA1, STXBP1, DAG1, APBB1…	1325	1447	16130	1.79197	8.39675e-16	8.00713e-16
GOTERM_BP	GO:0034655~nucleobase-containing compound catabolic process	86	4.22573e-18	-17.3741	RPS8, RPS13, ERI1, NCBP2, RPLP2, RPS7, NOCT, PPP2CA, GDA, RPL13A, RPS9, CTIF, XRN2, RPS16, RPL34, BAX, NUDT3, RPL13, RPL23, UHMK1, MTAP, RPS24, ADPRM, RPL35, PDE4A, EIF4E, FAU, RPSA, RPS28, RPL12, RPS6, RPS18, EIF4B, RPL19, RPL29, RACK1, RPS14, RPL21, RPS11, HMGB2, LSM5, RPL35A, RPS3, RPL23A, RPL27, RPL37, RNASEH2A, RPS12, EIF3E, RBM8A, RPL17, RPL37A, EXOSC8, RPL39, ZFP36L2, RPS10, RPL6, RPL30, R…	1325	380	16130	2.75507	1.17819e-15	1.12351e-15
GOTERM_BP	GO:0006886~intracellular protein transport	165	5.52351e-18	-17.2578	GTSE1, TBC1D22B, F2R, TBC1D9, MYADM, HYAL2, ANP32B, RPS8, RPS13, SULF2, ZFYVE9, RUNDC1, SRP19, RPL13A, NUP35, CAMK1, RPS16, GDAP1, FBXW7, CEP131, KLC1, EHD3, KPNA6, AKAP12, TGFBR1, UHMK1, AP1S3, TRAM1, MDFI, RPS24, SPTBN1, RPL35, RPSA, TOMM20, PPM1A, NAPB, RPL19, KCNB2, CHP1, RPS14, RPL21, RPS11, SCG5, RPS3, ACTL6A, SEMA5A, RPL23A, RPL27, SNX18, TRPS1, RPL37, STX1B, RPL17, SEC61A1, MIEF2, TBC1D30…	1325	1020	16130	1.96926	1.44943e-15	1.38218e-15
GOTERM_BP	GO:0006605~protein targeting	127	8.40291e-18	-17.0756	F2R, MYADM, HYAL2, RPS8, RPS13, SULF2, ZFYVE9, SRP19, RPL13A, NUP35, RPS16, GDAP1, FBXW7, EHD3, KPNA6, AKAP12, TGFBR1, AP1S3, TRAM1, MDFI, RPS24, SPTBN1, RPL35, RPSA, TOMM20, PPM1A, RPL19, KCNB2, CHP1, RPS14, RPL21, RPS11, RPS3, ACTL6A, SEMA5A, RPL23A, RPL27, TRPS1, RPL37, RPL17, SEC61A1, MIEF2, RPL39, TIMM8B, NLGN1, RPL30, RPS2, RPL18, RPS19, TESC, HSPA8, PHB2, RPL14, GOLGA7B, RPS5, RPL4, RPL10A…	1325	701	16130	2.20549	2.08252e-15	1.98589e-15
GOTERM_BP	GO:0007399~nervous system development	285	1.86849e-17	-16.7285	SYT3, FGF13, CAMSAP1, KRAS, EGR3, PAK2, CNR1, GRIP1, TRIM32, SEMA4B, MYT1L, STK36, CXCR4, XRN2, NOTCH1, PRMT5, GABRA4, APOE, TGFBR1, UHMK1, BCL11B, GFAP, AMBRA1, B3GNT2, UNC5A, GAS7, EIF4E, MMP14, CPLX2, SYNJ1, PCLO, ZEB1, TAGLN3, SEPTIN2, LRRC4B, HMGB2, HCN1, ACTL6A, SEMA5A, KCNA2, CDK6, CTNS, STX1B, SMARCA2, EFHC1, TNC, MYC, SHANK3, NCKAP1, DPYSL2, BTBD6, EZH2, CPNE5, NUMBL, CHRM3, ENO3, HIPK2,…	1325	2170	16130	1.59883	4.38703e-15	4.18346e-15
GOTERM_BP	GO:1902582~single-organism intracellular transport	125	2.81981e-17	-16.5498	F2R, MYADM, HYAL2, RPS8, RPS13, SULF2, ZFYVE9, NCBP2, MYO5A, SRP19, KIF3C, RPL13A, NUP35, RPS16, EHD3, KPNA6, TGFBR1, TRAM1, MDFI, RPS24, NUP37, SPTBN1, RPL35, PRKCZ, RPSA, CPLX2, TOMM20, PPM1A, RPL19, KCNB2, SYNE2, CHP1, RPS14, RPL21, RPS11, AAAS, KLC3, RPS3, SEMA5A, RPL23A, RPL27, TRPS1, RPL37, RPL17, SEC61A1, MIEF2, RPL39, HIF1A, RPL30, RPS2, RPL18, RPS19, TESC, PHB2, RPL14, GOLGA7B, HTT, APP,…	1325	695	16130	2.18949	6.28959e-15	5.99774e-15
GOTERM_BP	GO:0006412~translation	114	3.05937e-15	-14.5144	RPS8, RPS13, ABTB1, NCBP2, CDK4, RPL13A, RPS16, EEF1G, EIF3H, UHMK1, TARS1, RPS24, KARS1, RPL35, EIF4E, MRPL11, RPSA, EIF4EBP1, RPL19, RPS14, RPL21, RPS11, RPS3, RPL23A, RPL27, MRPL40, CPEB1, EIF3G, RPL37, CPEB2, RPL17, RPL39, RPL30, RPS2, RPL18, RPS19, CDKAL1, RPL14, YAE1, RPS5, RPL4, RPL10A, CNOT6, SLC25A13, NCK1, RPL22, RPL5, RPLP0, RPL10, EIF3D, EIF2A, RPL18A, EEF1B2, EEF1A1, RPLP2, RPS7, MRP…	1325	641	16130	2.16504	6.49898e-13	6.19741e-13
GOTERM_BP	GO:0043043~peptide biosynthetic process	117	3.40927e-15	-14.4673	RPS8, RPS13, ABTB1, NCBP2, CDK4, RPL13A, RPS16, EEF1G, EIF3H, UHMK1, TARS1, RPS24, KARS1, RPL35, EIF4E, MRPL11, RPSA, EIF4EBP1, RPL19, RPS14, RPL21, RPS11, RPS3, RPL23A, RPL27, MRPL40, CPEB1, EIF3G, RPL37, CPEB2, RPL17, RPL39, RPL30, RPS2, RPL18, RPS19, CDKAL1, RPL14, YAE1, RPS5, RPL4, RPL10A, CNOT6, SLC25A13, NCK1, RPL22, RPL5, RPLP0, RPL10, EIF3D, EIF2A, RPL18A, EEF1B2, EEF1A1, RPLP2, RPS7, PCS…	1325	667	16130	2.1354	6.91307e-13	6.59229e-13
GOTERM_BP	GO:0048167~regulation of synaptic plasticity	44	9.75965e-15	-14.0106	UNC13A, PPP1R9A, NEURL1, DLG4, RAPGEF2, KRAS, RIN1, SIPA1L1, STXBP1, PTEN, BAIAP2, CDC20, SHANK3, PTK2B, NLGN1, IQSEC2, GRIN2A, SYNGR1, GRM5, CAMK2B, DRD1, PLK2, CPEB3, MAPK1, PICK1, APOE, SLC8A2, RAB3A, GFAP, NEUROD2, BRAF, JPH3, PRKCZ, YWHAG, SYT7, CPLX2, RASGRF1, NETO1, CAMK2A, ATP2B2, KALRN, SNAP47, CRTC1, SHANK2	1325	140	16130	3.82598	1.89295e-12	1.80511e-12
GOTERM_BP	GO:0043604~amide biosynthetic process	122	5.70289e-14	-13.2439	RPS8, RPS13, ST6GALNAC6, ABTB1, NCBP2, CDK4, RPL13A, SPTSSA, RPS16, EEF1G, EIF3H, UHMK1, TARS1, RPS24, KARS1, RPL35, EIF4E, MRPL11, RPSA, EIF4EBP1, RPL19, RPS14, RPL21, RPS11, RPS3, RPL23A, RPL27, MRPL40, CPEB1, EIF3G, RPL37, CPEB2, RPL17, RPL39, RPL30, RPS2, RPL18, RPS19, CDKAL1, RPL14, YAE1, RPS5, RPL4, RPL10A, CNOT6, SLC25A13, NCK1, RPL22, RPL5, RPLP0, RPL10, EIF3D, EIF2A, RPL18A, EEF1B2, EEF1…	1325	736	16130	2.0179	1.06002e-11	1.01084e-11
GOTERM_BP	GO:0072594~establishment of protein localization to organelle	112	2.69179e-13	-12.57	F2R, HYAL2, RPS8, RPS13, SULF2, ZFYVE9, SRP19, RPL13A, NUP35, RPS16, GDAP1, FBXW7, KPNA6, TFDP1, TGFBR1, MDFI, RPS24, SPTBN1, RPL35, RPSA, TOMM20, PPM1A, RPL19, CHP1, RPS14, RPL21, RPS11, DNAJA1, RPS3, ACTL6A, SEMA5A, RPL23A, RPL27, TRPS1, RPL37, RPL17, SEC61A1, RPL39, TIMM8B, RPL30, RPS2, RPL18, RPS19, HSPA8, PHB2, RPL14, RPS5, RPL4, RPL10A, ELMOD1, VPS25, RPL22, SAE1, RPL5, RPLP0, RPL10, DACT3,…	1325	666	16130	2.04721	4.80323e-11	4.58035e-11
GOTERM_BP	GO:0048812~neuron projection morphogenesis	97	3.47021e-13	-12.4596	SYT3, FGF13, KRAS, SLITRK4, KIRREL3, SEMA6B, MAPK8IP2, RTN4, BAIAP2, SEMA4B, NOTCH1, PLXNA3, CPNE1, EFNA5, AMIGO1, APOE, TSKU, BCL11B, SPTBN1, B3GNT2, UNC5A, PLPPR4, PRKCZ, WEE1, KALRN, CPNE9, ADCY1, SEMA5A, SIPA1L1, IFRD1, SHANK3, NLGN1, DPYSL2, CPNE5, NUMBL, RAB3A, APP, CDK5R1, RGMA, SRCIN1, CRABP2, UNC13A, PPP1R9A, ULK1, MAP1S, DLG4, RAPGEF2, SPTAN1, GLI2, ZNF335, PTEN, STXBP1, DAG1, APBB1, LR…	1325	543	16130	2.17466	5.95407e-11	5.67779e-11
GOTERM_BP	GO:0045664~regulation of neuron differentiation	98	9.20253e-13	-12.0361	SYT3, FGF13, SEMA6B, RTN4, TRPV4, CNR1, TRIM32, BAIAP2, SEMA4B, CAMK1, NCS1, NOTCH1, PLXNA3, CPNE1, CDK5RAP3, EFNA5, AMIGO1, APOE, SF3A2, BCL11B, GFAP, EIF4E, MYCL, ZEB1, KALRN, CPNE9, BRINP1, SEMA5A, NEURL1, STX1B, SIPA1L1, IFRD1, FKBP4, SHANK3, NLGN1, DPYSL2, EZH2, CPNE5, PLK2, NEGR1, APP, CDK5R1, NCK1, PRRX1, CIB1, RGMA, SRCIN1, CRABP2, UNC13A, PPP1R9A, RAPGEF2, RAP1GAP, GLI2, PTEN, APBB1, NFE…	1325	560	16130	2.13038	1.52046e-10	1.44991e-10
GOTERM_BP	GO:0019058~viral life cycle	85	1.02173e-12	-11.9907	ROCK2, HYAL2, PI4KA, RPS8, RPS13, RPLP2, RPS7, DAG1, TRIM32, HSBP1L1, RPL13A, PPIB, RPS9, NUP35, CXCR4, RPS16, NOTCH1, RPL34, RPL13, MVB12A, NFIA, RPL23, APOE, NUP37, RPS24, RPL35, NEDD4L, FAU, RPSA, RPS28, RPL12, RPS6, RPS18, PRKN, RPL19, RPL29, P4HB, RPS14, RPL21, RPS11, EIF3F, AAAS, RPL35A, RPS3, RPL23A, RPL27, EIF3G, RPL37, RPS12, RPL17, RPL37A, RPL39, RPS10, RPL6, RPL30, RPS2, RPS23, RPL18, …	1325	455	16130	2.27419	1.62784e-10	1.55231e-10
GOTERM_BP	GO:0050804~modulation of synaptic transmission	62	1.06558e-12	-11.9724	UNC13A, PPP1R9A, DLG4, RAPGEF2, KRAS, MAPK8IP2, GRM3, STXBP1, PTEN, RIMS3, CNR1, BAIAP2, IQSEC2, GRIN2A, CAMK2B, APOE, SLC8A2, PPP1R9B, GFAP, JPH3, PRKCZ, YWHAG, CPLX2, PNKD, RASGRF1, CAMK2A, NAPB, PRKN, KALRN, NTSR1, SNAP47, CRTC1, NEURL1, RIN1, SIPA1L1, STX1B, SNCG, NISCH, CDC20, SHANK3, PTK2B, RIMS1, NLGN1, SYNGR1, GRM5, DRD1, PLK2, CPEB3, MAPK1, PICK1, NAPA, RAB3A, PRKCE, GRM2, NEUROD2, BRAF,…	1325	280	16130	2.69558	1.63916e-10	1.56309e-10
GOTERM_BP	GO:0006518~peptide metabolic process	127	1.99329e-12	-11.7004	RNPEP, RPS8, RPS13, ABTB1, NCBP2, CDK4, RPL13A, RPS16, GDAP1, EEF1G, EIF3H, APOE, UHMK1, TARS1, RPS24, KARS1, RPL35, EIF4E, MRPL11, RPSA, EIF4EBP1, RPL19, RPS14, RPL21, RPS11, SCG5, RPS3, RPL23A, RPL27, MRPL40, CPEB1, EIF3G, RPL37, CTNS, CPEB2, RPL17, RPL39, RPL30, RPS2, RPL18, RPS19, CDKAL1, RPL14, YAE1, RPS5, RPL4, RPL10A, CNOT6, SLC25A13, NCK1, RPL22, RPL5, RPLP0, SEC11A, RPL10, EIF3D, EIF2A, …	1325	818	16130	1.89003	2.96402e-10	2.82648e-10
GOTERM_BP	GO:0050767~regulation of neurogenesis	111	3.03644e-12	-11.5176	SYT3, FGF13, SEMA6B, RTN4, TRPV4, CNR1, TRIM32, BAIAP2, SEMA4B, CAMK1, CXCR4, NCS1, NOTCH1, PLXNA3, PRMT5, CPNE1, CDK5RAP3, EFNA5, AMIGO1, APOE, SF3A2, BCL11B, GFAP, OPRM1, EIF4E, SYNJ1, MYCL, ZEB1, KALRN, CPNE9, BRINP1, HMGB2, SEMA5A, NEURL1, STX1B, SIPA1L1, IFRD1, MYC, FKBP4, SHANK3, HIF1A, NLGN1, DPYSL2, EZH2, CPNE5, PLK2, NUMBL, NEGR1, APP, CDK5R1, NCK1, PRRX1, CIB1, RGMA, SRCIN1, CRABP2, UNC…	1325	682	16130	1.98133	4.36953e-10	4.16678e-10
GOTERM_BP	GO:0048468~cell development	245	5.19832e-12	-11.2841	SYT3, MYADM, FGF13, CAMSAP1, KRAS, SMAD5, PAK2, CNR1, GRIP1, TRIM32, SEMA4B, CXCR4, NOTCH1, PRMT5, APOE, TGFBR1, UHMK1, BCL11B, GFAP, B3GNT2, UNC5A, EIF4E, SYNJ1, ZEB1, SEPTIN2, HMGB2, HCN1, SEMA5A, CDK6, STX1B, SMARCA2, TNC, MYC, SHANK3, DPYSL2, STRBP, RPS19, EZH2, CPNE5, NUMBL, RPS6KA2, APP, SIRT6, NCK1, CAMK2D, PRRX1, GNAO1, CIB1, TBC1D24, SRCIN1, PPP1R16B, HMGB1, DACT3, ROCK2, PPP1R9A, RAP1GA…	1325	1968	16130	1.51551	7.24679e-10	6.91052e-10
GOTERM_BP	GO:0010975~regulation of neuron projection development	76	3.93085e-11	-10.4055	UNC13A, SYT3, PPP1R9A, RAPGEF2, FGF13, SEMA6B, PTEN, RTN4, TRPV4, CNR1, BAIAP2, NFE2L2, APBB1, SEMA4B, ENC1, LINGO1, CAMK1, ID1, NCS1, PLXNA3, CAMK2B, EFNA5, AMIGO1, TRPC5, APOE, TIAM1, SF3A2, PLXNA2, MEGF8, GFAP, NEDD4L, DAB1, CDKL5, PRKN, KALRN, CPNE9, CAMK1D, CRTC1, SEMA5A, NEURL1, SIPA1L1, NGEF, STX1B, IFRD1, PRKCSH, SEMA4F, FKBP4, BMPR2, CDC20, SHANK3, SSH1, PTK2B, RIMS1, NLGN1, INPP5J, DPYS…	1325	413	16130	2.24018	5.3138e-09	5.06722e-09
GOTERM_BP	GO:0048667~cell morphogenesis involved in neuron differentiation	86	4.42286e-11	-10.3543	PPP1R9A, ULK1, DLG4, RAPGEF2, SPTAN1, FGF13, KRAS, SLITRK4, GLI2, SEMA6B, MAPK8IP2, STXBP1, PTEN, RTN4, DAG1, BAIAP2, APBB1, LRTM2, SEMA4B, LINGO1, ID1, NOTCH1, PLXNA3, CAMK2B, EFNA5, AMIGO1, TRPC5, APOE, TSKU, TIAM1, BCL11B, PLXNA2, MEGF8, ETV4, B3GNT2, SPTBN1, UNC5A, PLPPR4, SPTBN2, DAB1, CDKL5, SPTBN4, CAMK2A, FZD3, KALRN, APBB2, ADCY1, UNK, SEMA5A, UNC5D, LRFN1, ANK3, MEF2A, SIPA1L1, NGEF, LH…	1325	496	16130	2.11074	5.80305e-09	5.53378e-09
GOTERM_BP	GO:0051960~regulation of nervous system development	117	6.21526e-11	-10.2065	SYT3, FGF13, SLITRK4, SEMA6B, RTN4, TRPV4, CNR1, TRIM32, BAIAP2, SEMA4B, CAMK1, CXCR4, NCS1, NOTCH1, PLXNA3, PRMT5, CPNE1, CDK5RAP3, EFNA5, AMIGO1, APOE, SF3A2, BCL11B, GFAP, OPRM1, EIF4E, ADGRL1, SYNJ1, MYCL, ZEB1, LRRC4B, KALRN, CPNE9, BRINP1, HMGB2, SEMA5A, NEURL1, STX1B, SIPA1L1, IFRD1, MYC, FKBP4, SHANK3, HIF1A, NLGN1, DPYSL2, EZH2, CPNE5, PLK2, NUMBL, NEGR1, APP, CDK5R1, NCK1, CLSTN1, PRRX1…	1325	769	16130	1.85216	7.92179e-09	7.5542e-09
GOTERM_BP	GO:0035556~intracellular signal transduction	304	1.78703e-10	-9.74787	F2R, RFC4, EXO1, MYADM, PI4KA, FGF13, KRAS, GARNL3, FBXL2, ERO1A, ARHGEF9, ADRA1B, UBE2N, DENND1A, GRIP1, TRIM32, RAB36, NKIRAS2, STK36, CXCR4, SHOC2, NOTCH1, IQSEC2, PRMT5, IL12A, MCTP1, APOE, TGFBR1, DUSP22, MAPKAPK3, MDFI, BCL2L10, SCAI, ARL4D, IQSEC1, IQSEC3, PCLO, PIP5K1C, LRRC4B, OTUD7A, CHP1, DNAJA1, CHEK2, RPTOR, PPIF, RPS3, PSMA2, DGKH, SEMA5A, PLEKHA1, RASGRF2, PLEKHG5, AKAP11, MYC, CDC…	1325	2657	16130	1.39284	2.21443e-08	2.11168e-08
GOTERM_BP	GO:0048858~cell projection morphogenesis	118	2.86115e-10	-9.54346	SYT3, FGF13, KRAS, SLITRK4, KIRREL3, SEMA6B, MAPK8IP2, RTN4, BAIAP2, SEMA4B, STK36, NOTCH1, PLXNA3, CPNE1, CEP131, TMEM17, EHD3, EFNA5, AMIGO1, APOE, TSKU, MACIR, BCL11B, SPTBN1, B3GNT2, UNC5A, PLPPR4, PRKCZ, WEE1, SEPTIN2, KALRN, CPNE9, ADCY1, ABCC4, SEMA5A, NEURL1, SIPA1L1, IFRD1, NME5, TBC1D30, SHANK3, NLGN1, DPYSL2, CPNE5, B9D1, NUMBL, HTT, RAB3A, APP, CDK5R1, RGMA, WASF1, SRCIN1, CRABP2, UNC…	1325	797	16130	1.80236	3.44962e-08	3.28955e-08
GOTERM_BP	GO:0032990~cell part morphogenesis	120	3.25902e-10	-9.48691	SYT3, FGF13, KRAS, SLITRK4, KIRREL3, SEMA6B, MAPK8IP2, RTN4, BAIAP2, SEMA4B, STK36, NOTCH1, PLXNA3, CPNE1, CEP131, TMEM17, EHD3, EFNA5, AMIGO1, APOE, TSKU, MACIR, BCL11B, SPTBN1, B3GNT2, UNC5A, PLPPR4, PRKCZ, WEE1, SEPTIN2, KALRN, CPNE9, ADCY1, ABCC4, SEMA5A, NEURL1, SIPA1L1, IFRD1, NME5, TBC1D30, SHANK3, NLGN1, DPYSL2, CPNE5, B9D1, NUMBL, HTT, RAB3A, APP, CDK5R1, RGMA, WASF1, SRCIN1, CRABP2, UNC…	1325	817	16130	1.78804	3.82592e-08	3.64839e-08
GOTERM_BP	GO:0033365~protein localization to organelle	129	3.72933e-10	-9.42837	GTSE1, F2R, HYAL2, RPS8, RPS13, SULF2, ZFYVE9, SRP19, MIS12, RPL13A, NUP35, RPS16, GDAP1, FBXW7, CEP131, CDK5RAP3, KPNA6, SYNE1, TFDP1, TGFBR1, MDFI, RPS24, SPTBN1, RPL35, OBSCN, RPSA, TOMM20, PPM1A, RPL19, SYNE2, CHP1, RPS14, RPL21, RPS11, DNAJA1, RPS3, ACTL6A, SEMA5A, RPL23A, RPL27, TRPS1, RPL37, RPL17, SEC61A1, RPL39, TIMM8B, RPL30, RPS2, RPL18, RPS19, EZH2, HSPA8, PHB2, RPL14, RPS5, RPL4, RPL…	1325	902	16130	1.74101	4.26578e-08	4.06784e-08
GOTERM_BP	GO:0034660~ncRNA metabolic process	92	4.33563e-10	-9.36295	TSR2, POU2F1, RPS8, RPS13, ERI1, NCBP2, TSEN34, RPLP2, RPS7, RPL13A, RPS9, XRN2, RPS16, RPL34, TRMT10A, RPL13, RNASEK, RPL23, TARS1, GTF2A2, RPS24, YARS1, KARS1, RPL35, FAU, AIMP1, RPSA, RPS28, RPL12, FCF1, RPS6, SNU13, RPS18, EMG1, RPL19, RPL29, RPS14, RPL21, RPS11, HSD17B10, RPL35A, RPS3, RPL23A, RPL27, AIMP2, RPL37, RPS12, RPL17, NIFK, RPL37A, EXOSC8, RPL39, THG1L, RPS10, RPL6, METTL16, RPL30,…	1325	570	16130	1.96486	4.83531e-08	4.61094e-08
GOTERM_BP	GO:0044265~cellular macromolecule catabolic process	136	6.6857e-10	-9.17485	GTSE1, UBE2C, RPS8, RPS13, ABTB1, NCBP2, FBXL2, UBXN2A, NOCT, UBE2N, TRIM32, RPL13A, XRN2, USP14, RPS16, UHRF1, FBXW7, CDK5RAP3, MVB12A, HECW1, APOE, UHMK1, RPS24, RNF19B, RPL35, EIF4E, RPSA, ATP13A2, OTUD7A, RPL19, RPS14, KCTD5, RPL21, RPS11, HMGB2, CHEK2, RPS3, PSMA2, RPL23A, RPL27, RPL37, RPL17, CLOCK, HECW2, UBE2K, EXOSC8, RPL39, RPL30, RPS2, RPL18, PSMC1, RPS19, BTBD6, BNIP3, CPVL, PLK2, RPL…	1325	976	16130	1.69632	7.27437e-08	6.93683e-08
GOTERM_BP	GO:0007264~small GTPase mediated signal transduction	85	2.25687e-09	-8.64649	ROCK2, F2R, RAPGEF2, ARHGEF10L, RUNDC3A, RAB3D, KRAS, STMN3, RHOF, RHOBTB2, ARHGEF9, ARHGEF11, DENND1A, DOCK3, RAB36, RAB6B, NKIRAS2, SHOC2, IQSEC2, MCF2L, ARFGEF2, RFXANK, APOE, TIAM1, MAPKAPK3, RAB27B, RALGPS1, MYO9B, ARF3, SH2D3C, TAX1BP3, ABR, SCAI, AGAP1, OBSCN, LRRK1, ARL4D, IQSEC3, IQSEC1, RAB13, RALB, DAB1, WASF2, GPR65, RASGRF1, REM2, KALRN, MAPKAPK2, CHP1, RGL1, GNA12, BCL6, RASGRF2, PL…	1325	527	16130	1.96348	2.39712e-07	2.28589e-07
GOTERM_BP	GO:0034765~regulation of ion transmembrane transport	69	2.41075e-09	-8.61785	CBARP, F2R, DLG4, CACNA2D1, MAPK8IP2, MYO5A, TMEM37, UBASH3B, KCNJ12, BAX, CACNA1I, CACNB1, ATP1B1, SCN2B, SCN10A, CACNA1F, EHD3, AMIGO1, CAB39, KCNAB2, SRI, CACNA1D, CACNA1E, KCNJ6, OPRM1, SCN8A, KCNA1, JPH3, NEDD4L, NOS1AP, CORO1A, RASGRF1, KCNB2, CHP1, NTSR1, CACNB2, HCN1, CACNB3, CRHR1, PPIF, KCNA2, JPH1, CNIH2, ANK3, KCNJ9, KCNAB1, KCNG3, SHANK3, PTK2B, NLGN1, KCNIP4, TESC, RANGRF, DRD1, CAC…	1325	392	16130	2.1428	2.50101e-07	2.38496e-07
GOTERM_BP	GO:0016071~mRNA metabolic process	101	2.93843e-09	-8.53188	RPS8, RPS13, NCBP2, NOCT, RBMX2, RPL13A, XRN2, RPS16, PRMT5, UHMK1, SF3A2, RPS24, RPL35, BCAS2, EIF4E, RPSA, RPL19, RPS14, RPL21, RPS11, RPS3, RPL23A, RPL27, CPEB1, RPL37, RPL17, EXOSC8, CELF5, RPL39, SNRPG, RPL30, RPS2, RPL18, RPS19, HSPA8, RPL14, ADARB1, PRPF38A, APP, NOVA1, RPS5, RPL4, RPL10A, CNOT6, RPL22, RPL5, RPLP0, RPL10, RPL18A, CLNS1A, ERI1, TSEN34, RPLP2, RPS7, PPP2CA, YBX1, ISY1, RPS9…	1325	672	16130	1.82966	2.97917e-07	2.84093e-07
GOTERM_BP	GO:0050769~positive regulation of neurogenesis	68	3.43869e-09	-8.46361	UNC13A, SYT3, PPP1R9A, RAPGEF2, GLI2, ZNF335, CNR1, TRIM32, BAIAP2, NFE2L2, APBB1, BMP2, ENC1, CAMK1, CXCR4, NOTCH1, CAMK2B, PRMT5, CPNE1, EFNA5, AMIGO1, TRPC5, APOE, TIAM1, SF3A2, MEGF8, GFAP, OPRM1, SOX11, NEDD4L, SYNJ1, ZEB1, DAB1, CDKL5, FZD3, PRKN, KALRN, CPNE9, CAMK1D, BRINP1, CRTC1, BCL6, SEMA5A, NEURL1, BIN1, MYC, BMPR2, SHANK3, PTK2B, HIF1A, RIMS1, NLGN1, EZH2, CPNE5, MMD, NDRG4, TCF3, N…	1325	387	16130	2.13903	3.40889e-07	3.25071e-07
GOTERM_BP	GO:0051962~positive regulation of nervous system development	75	4.83588e-09	-8.31552	UNC13A, SYT3, PPP1R9A, RAPGEF2, SLITRK4, GLI2, ZNF335, CNR1, TRIM32, BAIAP2, NFE2L2, APBB1, LRTM2, BMP2, ENC1, CAMK1, CXCR4, NOTCH1, CAMK2B, PRMT5, CPNE1, EFNA5, AMIGO1, TRPC5, APOE, TIAM1, SF3A2, MEGF8, GFAP, OPRM1, SOX11, NEDD4L, ADGRL1, SYNJ1, ZEB1, DAB1, CDKL5, FZD3, PRKN, LRRC4B, KALRN, CPNE9, CAMK1D, BRINP1, CRTC1, BCL6, SEMA5A, NEURL1, BIN1, MYC, BMPR2, CDC20, SHANK3, PTK2B, HIF1A, RIMS1, …	1325	449	16130	2.03345	4.68975e-07	4.47213e-07
GOTERM_BP	GO:0006836~neurotransmitter transport	43	7.12442e-09	-8.14725	DNAJC5, UNC13A, SYT3, PPP1R9A, LIN7B, SLC17A7, SLC17A6, STX1B, SNCG, STXBP1, RIMS3, RIMS1, NLGN1, PTPRN2, DRD1, HSPA8, SV2B, NAPA, GAD1, CASK, RAB3A, GFAP, SLC6A17, SYT16, BRAF, ADGRL1, DOC2A, SYNJ1, SYT7, PCLO, CPLX2, PNKD, RAB3B, SV2A, APBA1, CAMK2A, PPFIA4, NAPB, PIP5K1C, PRKN, DOC2B, SLC6A13, SNAP47	1325	197	16130	2.65718	6.76214e-07	6.44836e-07
GOTERM_BP	GO:0034762~regulation of transmembrane transport	69	1.05597e-08	-7.97635	CBARP, F2R, DLG4, CACNA2D1, MAPK8IP2, MYO5A, TMEM37, UBASH3B, KCNJ12, BAX, CACNA1I, CACNB1, ATP1B1, SCN2B, SCN10A, CACNA1F, EHD3, AMIGO1, CAB39, KCNAB2, SRI, CACNA1D, CACNA1E, KCNJ6, OPRM1, SCN8A, KCNA1, JPH3, NEDD4L, NOS1AP, CORO1A, RASGRF1, KCNB2, CHP1, NTSR1, CACNB2, HCN1, CACNB3, CRHR1, PPIF, KCNA2, JPH1, CNIH2, ANK3, KCNJ9, KCNAB1, KCNG3, SHANK3, PTK2B, NLGN1, KCNIP4, TESC, RANGRF, DRD1, CAC…	1325	406	16130	2.06891	9.81393e-07	9.35855e-07
GOTERM_BP	GO:0061564~axon development	72	3.86684e-08	-7.41264	ULK1, SPTAN1, FGF13, KRAS, SLITRK4, GLI2, SEMA6B, CTNNA1, STXBP1, PTEN, RTN4, DAG1, CNR1, TRIM32, BAIAP2, APBB1, LRTM2, SEMA4B, LINGO1, NOTCH1, PLXNA3, EFNA5, AMIGO1, TRPC5, APOE, TSKU, TIAM1, BCL11B, PLXNA2, MEGF8, ETV4, B3GNT2, SPTBN1, UNC5A, PLPPR4, SPTBN2, DAB1, CDKL5, SPTBN4, FZD3, APBB2, ADCY1, RTN4RL1, SEMA5A, UNC5D, LRFN1, ANK3, TNC, IFRD1, SEMA4F, NPTX1, BMPR2, DPYSL2, ENAH, CHN1, NUMBL,…	1325	445	16130	1.96966	3.5204e-06	3.35705e-06
GOTERM_BP	GO:0034220~ion transmembrane transport	128	4.04476e-08	-7.39311	F2R, SLC17A6, CACNA2D1, MAPK8IP2, ERO1A, MYO5A, ARHGEF9, TRPV4, ASIC4, UBASH3B, GABRD, KCNJ12, NCS1, TMEM63C, CACNA1I, SCN2B, SCN10A, AQP7, CACNA1F, EHD3, GABRA4, AMIGO1, COX5A, SLC8A2, TMCO1, COX7A2L, CACNA1E, OPRM1, CNNM4, JPH3, AQP3, CORO1A, RASGRF1, ATP13A2, ADAMTS8, KCNB2, CHP1, HCN1, ABCC4, CRHR1, PPIF, KCNA2, SLC4A3, KCNJ9, ATP6V1E1, MYC, MCOLN2, SHANK3, COA6, NLGN1, ATP11C, TESC, KCNN1, C…	1325	963	16130	1.61809	3.60873e-06	3.44128e-06
GOTERM_BP	GO:0043269~regulation of ion transport	84	5.02304e-08	-7.29903	CBARP, F2R, STC2, DLG4, ACSL4, CACNA2D1, MAPK8IP2, MYO5A, TMEM37, CNR1, UBASH3B, KCNJ12, BAX, CACNA1I, CACNB1, ATP1B1, CAMK2B, SCN2B, SCN10A, TNFRSF11A, CACNA1F, EHD3, AMIGO1, CAB39, KCNAB2, SRI, CACNA1D, CACNA1E, KCNJ6, OPRM1, SCN8A, KCNA1, JPH3, NEDD4L, SARAF, NOS1AP, SPTBN4, CORO1A, RASGRF1, CAMK2A, SEPTIN2, KCNB2, CHP1, NTSR1, CACNB2, HCN1, CACNB3, CRHR1, PPIF, KCNA2, JPH1, CNIH2, ANK3, KCNJ9…	1325	554	16130	1.84581	4.39369e-06	4.18981e-06
GOTERM_BP	GO:0007611~learning or memory	44	6.93113e-08	-7.1592	DLG4, FGF13, KRAS, SLC17A7, RIN1, CTNS, MAPK8IP2, KCNAB1, PTEN, PRKAR2B, CNR1, GRIN2B, SHANK3, HIF1A, GRIN2A, GRM5, DRD1, PLK2, NDRG4, CPEB3, CAMK4, HTT, SLC8A2, PPP1R9B, PRKAR1B, APP, NEUROD2, BRAF, JPH3, PRKCZ, CNTNAP2, SYNJ1, RASGRF1, NETO1, GABRA5, PRKN, KALRN, BRINP1, NTSR1, GPR52, ADCY1, AAAS, CRTC1, SHANK2	1325	220	16130	2.43472	5.94611e-06	5.6702e-06
GOTERM_BP	GO:0023061~signal release	68	7.1253e-08	-7.1472	DNAJC5, UNC13A, SYT3, PPP1R9A, LIN7B, VAMP3, MYO5A, STXBP1, HADH, RIMS3, TRPV4, CNR1, C1QTNF1, OXCT1, PTPRN2, VIP, MPC2, EFNA5, GAD1, TIAM1, CRY1, SRI, CACNA1D, CACNA1E, OPRM1, SYT16, SOX11, ADGRL1, DOC2A, SYNJ1, PCLO, CPLX2, PNKD, APBA1, NAPB, PIP5K1C, PRKN, SOX4, RAB11FIP2, SNAP47, CRHR1, UCP2, STX1B, C2CD2L, ARRB1, CLOCK, AACS, HIF1A, RIMS1, NLGN1, CDK16, HSPA8, CACNA1C, NAPA, CASK, MIDN, RAB3…	1325	417	16130	1.98514	5.99735e-06	5.71906e-06
GOTERM_BP	GO:0000904~cell morphogenesis involved in differentiation	105	7.46765e-08	-7.12682	MYADM, FGF13, KRAS, SLITRK4, SEMA6B, MAPK8IP2, RTN4, BAIAP2, SEMA4B, NOTCH1, PLXNA3, EFNA5, AMIGO1, APOE, TGFBR1, TSKU, BCL11B, SPTBN1, B3GNT2, UNC5A, PLPPR4, SALL1, KALRN, PLOD3, ADCY1, SEMA5A, SIPA1L1, IFRD1, SHANK3, HIF1A, NLGN1, DPYSL2, EZH2, NUMBL, RAB3A, APP, CDK5R1, CIB1, RGMA, SRCIN1, CRABP2, DACT3, PPP1R9A, ULK1, DLG4, RAPGEF2, HNRNPAB, SPTAN1, VAMP3, GLI2, PTEN, PPP2CA, STXBP1, DAG1, AP…	1325	753	16130	1.69751	6.16911e-06	5.88285e-06
GOTERM_BP	GO:0051345~positive regulation of hydrolase activity	122	8.20377e-08	-7.08599	TBC1D22B, F2R, TBC1D9, ANP32B, GARNL3, RUNDC1, ARHGEF9, ARHGEF11, DENND1A, DOCK3, DNAJC1, IQSEC2, UHRF1, MCF2L, RALGPS1, BCL2L10, SPTBN1, PPARGC1B, HSPE1, AGAP1, OBSCN, PRKCZ, MMP14, IQSEC3, IQSEC1, RASGRF1, KALRN, STXBP5, HMGB2, ARHGAP17, RGL1, RPS3, SNX18, RASGRF2, SRGAP3, PLEKHG5, RIN1, SIPA1L1, MYC, CDC42EP4, TBC1D30, ARHGAP12, PSD, RABIF, EZH2, DNMBP, HERC2, ADRB1, PFN1, SOX7, RAB3A, APP, FR…	1325	917	16130	1.6196	6.654e-06	6.34524e-06
GOTERM_BP	GO:0045666~positive regulation of neuron differentiation	55	9.29671e-08	-7.03167	UNC13A, SYT3, PPP1R9A, RAPGEF2, GLI2, CNR1, TRIM32, BAIAP2, NFE2L2, APBB1, BMP2, ENC1, CAMK1, CAMK2B, CPNE1, EFNA5, AMIGO1, TRPC5, APOE, TIAM1, SF3A2, MEGF8, SOX11, NEDD4L, ZEB1, DAB1, CDKL5, PRKN, KALRN, CPNE9, CAMK1D, BRINP1, CRTC1, BCL6, SEMA5A, NEURL1, BMPR2, SHANK3, PTK2B, RIMS1, NLGN1, EZH2, CPNE5, MMD, NDRG4, TCF3, CPEB3, NEGR1, NEUROD2, BRAF, PACSIN1, NCK1, RGMA, CRABP2, RND2	1325	310	16130	2.15983	7.40582e-06	7.06218e-06
GOTERM_BP	GO:0043087~regulation of GTPase activity	98	9.57577e-08	-7.01883	TBC1D22B, TBC1D9, GARNL3, RUNDC1, ARHGEF9, ARHGEF11, DENND1A, DOCK3, IQSEC2, PLXNA3, MCF2L, EFNA5, RALGPS1, SPTBN1, AGAP1, OBSCN, IQSEC3, IQSEC1, RASGRF1, KALRN, STXBP5, ARHGAP17, RGL1, SNX18, RASGRF2, SRGAP3, PLEKHG5, RIN1, SIPA1L1, CPEB2, CDC42EP4, TBC1D30, ARHGAP12, PSD, RABIF, EZH2, DNMBP, HERC2, ADRB1, FRS3, ELMOD1, RTKN, CAMK2D, NCK1, DENND6A, RAB3IL1, GNAO1, TBC1D24, RAPGEFL1, RIN3, ARHGEF…	1325	691	16130	1.7265	7.4943e-06	7.14655e-06
GOTERM_BP	GO:0010720~positive regulation of cell development	75	1.09505e-07	-6.96057	UNC13A, SYT3, PPP1R9A, MYADM, RAPGEF2, GLI2, ZNF335, CNR1, TRIM32, BAIAP2, NFE2L2, APBB1, BMP2, ENC1, CAMK1, CXCR4, NOTCH1, CAMK2B, PRMT5, CPNE1, EFNA5, AMIGO1, TGFBR1, TRPC5, APOE, TIAM1, SF3A2, MEGF8, GFAP, OPRM1, SOX11, NEDD4L, SYNJ1, ZEB1, DAB1, CDKL5, FZD3, PRKN, KALRN, CPNE9, CAMK1D, BRINP1, CRTC1, ATP6AP1, BCL6, SEMA5A, NEURL1, BIN1, MYC, BMPR2, SHANK3, UNC13D, PTK2B, HIF1A, RIMS1, NLGN1, …	1325	483	16130	1.89031	8.42245e-06	8.03163e-06
GOTERM_BP	GO:0098660~inorganic ion transmembrane transport	101	1.45721e-07	-6.83648	F2R, CACNA2D1, ERO1A, MYO5A, TRPV4, ASIC4, UBASH3B, GABRD, KCNJ12, NCS1, CACNA1I, SCN2B, SCN10A, CACNA1F, EHD3, GABRA4, AMIGO1, COX5A, SLC8A2, TMCO1, COX7A2L, CACNA1E, OPRM1, CNNM4, JPH3, CORO1A, ADAMTS8, KCNB2, CHP1, HCN1, CRHR1, KCNA2, SLC4A3, KCNJ9, ATP6V1E1, MCOLN2, COA6, TESC, KCNN1, CACNA1C, PTPN3, HTT, ANO3, KCNQ2, CACNA2D3, CAMK2D, SLC4A2, SLC8A1, ATP1A1, CACFD1, GABRB2, KCNC1, SLC20A1, K…	1325	725	16130	1.69591	1.1018e-05	1.05067e-05
GOTERM_BP	GO:0044267~cellular protein metabolic process	486	2.07015e-07	-6.684	F2R, ST6GALNAC6, ABTB1, SMAD5, NCBP2, PAK2, ERO1A, UBXN2A, CDK4, ADRA1B, VKORC1L1, DNAJC1, USP14, PRMT5, EIF3H, DUSP22, MAPKAPK3, TARS1, MDFI, NUP37, BCL2L10, B3GNT2, RIOX1, MMP14, RPSA, MMP15, RPL19, RPL21, GALNT13, DNAJA1, CHEK2, AAAS, PPIF, ACTL6A, MRPL40, CPEB1, CDK6, RASGRF2, RPL37, AAK1, PAK6, MYC, RPL39, SHANK3, RPL30, RPL18, BTBD6, CHRM3, HIPK2, GOLGA7B, APP, SIRT6, CHD3, CNOT6, CAMK2D, K…	1325	4900	16130	1.20742	1.53916e-05	1.46773e-05
GOTERM_BP	GO:1904062~regulation of cation transmembrane transport	42	2.14589e-07	-6.66839	CBARP, F2R, JPH1, ANK3, CACNA2D1, MYO5A, KCNAB1, UBASH3B, PTK2B, KCNIP4, BAX, CACNB1, ATP1B1, TESC, SCN2B, RANGRF, DRD1, EHD3, AMIGO1, CACNA1C, CAB39, PTPN3, KCNAB2, HTT, THY1, PRKCE, SRI, CACNA1D, JPH3, NEDD4L, FLNA, CAMK2D, NOS1AP, CORO1A, SLC8A1, CHP1, NTSR1, CACNB2, CACNB3, KCNC1, CRHR1, PPIF	1325	213	16130	2.40043	1.56932e-05	1.4965e-05
GOTERM_BP	GO:0007269~neurotransmitter secretion	32	2.26952e-07	-6.64407	DNAJC5, UNC13A, SYT3, PPP1R9A, LIN7B, STX1B, STXBP1, RIMS3, RIMS1, NLGN1, PTPRN2, HSPA8, NAPA, GAD1, CASK, RAB3A, SYT16, BRAF, ADGRL1, DOC2A, SYNJ1, SYT7, PCLO, CPLX2, PNKD, APBA1, PPFIA4, NAPB, PIP5K1C, PRKN, DOC2B, SNAP47	1325	139	16130	2.80255	1.60704e-05	1.53247e-05
GOTERM_BP	GO:0099643~signal release from synapse	32	2.26952e-07	-6.64407	DNAJC5, UNC13A, SYT3, PPP1R9A, LIN7B, STX1B, STXBP1, RIMS3, RIMS1, NLGN1, PTPRN2, HSPA8, NAPA, GAD1, CASK, RAB3A, SYT16, BRAF, ADGRL1, DOC2A, SYNJ1, SYT7, PCLO, CPLX2, PNKD, APBA1, PPFIA4, NAPB, PIP5K1C, PRKN, DOC2B, SNAP47	1325	139	16130	2.80255	1.60704e-05	1.53247e-05
GOTERM_BP	GO:0006811~ion transport	174	2.45832e-07	-6.60936	F2R, ACSL4, FGF13, SLC17A6, CACNA2D1, MAPK8IP2, ERO1A, MYO5A, ARHGEF9, TRPV4, ASIC4, CNR1, UBASH3B, GABRD, KCNJ12, NCS1, TMEM63C, CACNA1I, SCN2B, SCN10A, AQP7, CACNA1F, EHD3, GABRA4, AMIGO1, COX5A, APOE, SLC8A2, TMCO1, COX7A2L, CACNA1E, SLC10A7, OPRM1, CNNM4, JPH3, AQP3, CORO1A, RASGRF1, SEPTIN2, ATP13A2, ADAMTS8, KCNB2, CHP1, HCN1, ABCC4, CRHR1, PPIF, KCNA2, SLC4A3, KCNJ9, CTNS, ATP6V1E1, MYC, M…	1325	1458	16130	1.45281	1.71352e-05	1.63401e-05
GOTERM_BP	GO:0006396~RNA processing	119	3.10685e-07	-6.50768	RPS8, RPS13, NCBP2, NOCT, RBMX2, RPL13A, XRN2, RPS16, PRMT5, UHMK1, SF3A2, RPS24, RTCA, KARS1, RPL35, BCAS2, RPSA, EMG1, RPL19, RPS14, RPL21, RPS11, HSD17B10, RPS3, RPL23A, RPL27, CPEB1, RPL37, RPL17, EXOSC8, CELF5, RPL39, THG1L, SNRPG, METTL16, RPL30, RPS2, RRS1, RPL18, RPS19, CDKAL1, HSPA8, RPL14, ADARB1, PRPF38A, DDX52, NOP2, APP, NOVA1, RPS5, RPL4, RPL10A, RPL22, RPL5, FTSJ3, RPLP0, ATXN1, DD…	1325	910	16130	1.59193	2.13226e-05	2.03332e-05
GOTERM_BP	GO:0060291~long-term synaptic potentiation	17	5.04769e-07	-6.29691	MAPK1, PPP1R9A, SLC8A2, GFAP, PTEN, BRAF, PRKCZ, SHANK3, PTK2B, NLGN1, KALRN, GRIN2A, SNAP47, DRD1, CRTC1, PLK2, SHANK2	1325	47	16130	4.40321	3.37922e-05	3.22241e-05
GOTERM_BP	GO:0099003~vesicle mediated transport in synapse	26	5.07526e-07	-6.29454	DNAJC5, UNC13A, SYT3, STX1B, STXBP1, RIMS3, DENND1A, RIMS1, NLGN1, SH3GL2, NAPA, DNM1, RAB3A, SYT16, BRAF, ADGRL1, DOC2A, PACSIN1, SYNJ1, SYT7, PCLO, CPLX2, NAPB, PIP5K1C, DOC2B, SNAP47	1325	102	16130	3.10307	3.37922e-05	3.22241e-05
GOTERM_BP	GO:0050806~positive regulation of synaptic transmission	27	5.33566e-07	-6.27281	UNC13A, PPP1R9A, DLG4, STX1B, PTEN, SHANK3, PTK2B, RIMS1, NLGN1, IQSEC2, GRIN2A, DRD1, PLK2, MAPK1, SLC8A2, PRKCE, GFAP, BRAF, PRKCZ, CLSTN1, RAB3B, NETO1, KALRN, NTSR1, SNAP47, CRTC1, SHANK2	1325	109	16130	3.01548	3.50035e-05	3.33793e-05
GOTERM_BP	GO:0000902~cell morphogenesis	151	5.47951e-07	-6.26126	TBC1D22B, SYT3, MYADM, FGF13, KRAS, SLITRK4, KIRREL3, SEMA6B, MAPK8IP2, RTN4, BAIAP2, SEMA4B, STK36, NOTCH1, PLXNA3, CPNE1, CEP131, TMEM17, EHD3, EFNA5, AMIGO1, APOE, TGFBR1, TSKU, MACIR, BCL11B, SPTBN1, B3GNT2, UNC5A, PLPPR4, PRKCZ, WEE1, CORO1A, SEPTIN2, SALL1, KALRN, CPNE9, PLOD3, ADCY1, ABCC4, SEMA5A, NEURL1, SIPA1L1, IFRD1, NME5, CDC42EP4, TBC1D30, SHANK3, HIF1A, NLGN1, DPYSL2, STRIP2, EZH2,…	1325	1240	16130	1.48243	3.54262e-05	3.37823e-05
GOTERM_BP	GO:0010976~positive regulation of neuron projection development	43	6.01804e-07	-6.22054	SEMA5A, UNC13A, SYT3, PPP1R9A, NEURL1, RAPGEF2, CNR1, BAIAP2, BMPR2, APBB1, NFE2L2, SHANK3, ENC1, PTK2B, RIMS1, CAMK1, NLGN1, CAMK2B, EZH2, CPNE5, EFNA5, NDRG4, CPEB3, AMIGO1, NEGR1, APOE, TRPC5, TIAM1, SF3A2, MEGF8, BRAF, NEDD4L, NCK1, PACSIN1, CDKL5, RGMA, PRKN, KALRN, CPNE9, CAMK1D, CRABP2, RND2, CRTC1	1325	229	16130	2.28587	3.83521e-05	3.65725e-05
GOTERM_BP	GO:0031346~positive regulation of cell projection organization	52	6.92813e-07	-6.15938	UNC13A, SYT3, PPP1R9A, RAPGEF2, CNR1, BAIAP2, NFE2L2, APBB1, ENC1, CAMK1, CAMK2B, EFNA5, AMIGO1, TGFBR1, TRPC5, APOE, TIAM1, SF3A2, MEGF8, NEDD4L, CDKL5, WASF2, PRKN, KALRN, KCTD17, CPNE9, CAMK1D, CRTC1, SEMA5A, NEURL1, CDC42EP4, BMPR2, SHANK3, NCKAP1, CORO1B, PTK2B, RIMS1, NLGN1, EZH2, CPNE5, NDRG4, CPEB3, NEGR1, PFN1, HTT, MNS1, BRAF, PACSIN1, NCK1, RGMA, CRABP2, RND2	1325	304	16130	2.08232	4.35301e-05	4.15102e-05
GOTERM_BP	GO:0030036~actin cytoskeleton organization	80	7.62651e-07	-6.11767	ROCK2, PPP1R9A, MYADM, ARHGEF10L, SPTAN1, KRAS, SDAD1, PRKAR1A, ACTR3B, RHOF, CTNNA1, ARHGEF11, TRPV4, TRIM32, BAIAP2, ID1, IQSEC2, LIMA1, TGFBR1, PPP1R9B, SPTBN1, XIRP2, PPARGC1B, MSRB1, ABR, SORBS2, SPTBN2, OBSCN, PRKCZ, IQSEC3, IQSEC1, RAB13, WASF2, TPM3, SPTBN4, CORO1A, GPR65, PIP5K1C, PRKN, TRIP10, FOXJ1, BCL6, IKBKB, SEMA5A, CNN3, MEF2A, SIPA1L1, MRTFA, CNN2, TWF1, ARRB1, FHOD3, RAP1GDS1, A…	1325	553	16130	1.7611	4.72526e-05	4.50599e-05
GOTERM_BP	GO:0042255~ribosome assembly	19	8.41802e-07	-6.07479	RPL23A, NPM1, RPS5, MRPL11, RPSA, RPL12, RPS28, RPL24, RPL3, RPS27L, RPL6, RPS10, RPL5, RPS19, RPS14, RPS17, RPL10, EIF2A, RPL11	1325	60	16130	3.85497	5.14422e-05	4.90552e-05
GOTERM_BP	GO:0032412~regulation of ion transmembrane transporter activity	37	8.85666e-07	-6.05273	CBARP, DLG4, JPH1, CNIH2, ANK3, CACNA2D1, MAPK8IP2, MYO5A, KCNAB1, SHANK3, PTK2B, NLGN1, CACNB1, ATP1B1, TESC, SCN2B, RANGRF, EHD3, CAB39, PTPN3, HTT, PRKCE, SRI, CACNA1D, OPRM1, JPH3, NEDD4L, CAMK2D, NOS1AP, RASGRF1, MINK1, CHP1, NTSR1, CACNB2, CACNB3, CRHR1, PPIF	1325	185	16130	2.43472	5.33913e-05	5.09138e-05
GOTERM_BP	GO:0097479~synaptic vesicle localization	30	1.06979e-06	-5.9707	DNAJC5, UNC13A, SYT3, CNIH2, STX1B, STXBP1, PTEN, RIMS3, DENND1A, RIMS1, NLGN1, DPYSL2, SH3GL2, NAPA, DNM1, RAB3A, SYT16, BRAF, ADGRL1, DOC2A, PACSIN1, SYNJ1, SYT7, PCLO, CPLX2, NAPB, PIP5K1C, DOC2B, SNAP47, AP3M1	1325	134	16130	2.72543	6.30142e-05	6.00902e-05
GOTERM_BP	GO:0042273~ribosomal large subunit biogenesis	20	1.09658e-06	-5.95996	RPL35A, RPL23A, YAE1, SDAD1, NOP2, RPL10A, RPL35, MRPL11, RPL12, RPL7, RPL24, RPL3, RPL6, SNU13, RPL5, RRS1, FTSJ3, RPL10, RPL11, RPL14	1325	67	16130	3.63391	6.30142e-05	6.00902e-05
GOTERM_BP	GO:0048489~synaptic vesicle transport	29	1.10179e-06	-5.9579	DNAJC5, UNC13A, SYT3, CNIH2, STX1B, STXBP1, RIMS3, DENND1A, RIMS1, NLGN1, DPYSL2, SH3GL2, NAPA, DNM1, RAB3A, SYT16, BRAF, ADGRL1, DOC2A, PACSIN1, SYNJ1, SYT7, PCLO, CPLX2, NAPB, PIP5K1C, DOC2B, SNAP47, AP3M1	1325	127	16130	2.77979	6.30142e-05	6.00902e-05
GOTERM_BP	GO:0097480~establishment of synaptic vesicle localization	29	1.10179e-06	-5.9579	DNAJC5, UNC13A, SYT3, CNIH2, STX1B, STXBP1, RIMS3, DENND1A, RIMS1, NLGN1, DPYSL2, SH3GL2, NAPA, DNM1, RAB3A, SYT16, BRAF, ADGRL1, DOC2A, PACSIN1, SYNJ1, SYT7, PCLO, CPLX2, NAPB, PIP5K1C, DOC2B, SNAP47, AP3M1	1325	127	16130	2.77979	6.30142e-05	6.00902e-05
GOTERM_BP	GO:0060627~regulation of vesicle-mediated transport	68	1.15118e-06	-5.93886	TBC1D22B, CBARP, SYT3, TBC1D9, DLG4, RAB3D, VAMP3, RUNDC1, SGIP1, STXBP1, PTEN, RIMS3, SNAP91, CLIP3, SH3GL2, NOTCH1, NCS1, CACNA1I, SGSM2, MVB12A, RAB27B, APOC1, SYT16, ABR, NEDD4L, DOC2A, SYNJ1, PCLO, CPLX2, RALB, PIK3CB, CORO1A, NAPB, ATP13A2, PRKN, STXBP5, CAMK1D, RACK1, ATP6AP1, CNIH2, BIN1, AAK1, STX1B, CNN2, ARRB1, TBC1D30, UNC13D, DLL1, RIMS1, NLGN1, NSF, NDRG4, MAPK1, PICK1, NAPA, SCAMP5…	1325	449	16130	1.84366	6.5005e-05	6.19886e-05
GOTERM_BP	GO:0032940~secretion by cell	122	1.34476e-06	-5.87136	F2R, DNAJC5, SYT3, HYAL2, RAB3D, CD276, MYO5A, HADH, TRPV4, CNR1, DNAJC1, NCS1, TNFSF13B, NOTCH1, CACNA1I, VIP, EFNA5, SPTBN1, CACNA1E, OPRM1, ADGRL1, PRKCZ, ARL4D, PCLO, CPLX2, SYNJ1, PNKD, CORO1A, PIP5K1C, ATP13A2, NAPB, STXBP5, CHP1, ABCC4, SCG5, SNAP47, CRHR1, KCNA2, STX1B, C2CD2L, CLOCK, NISCH, SCAMP1, HIF1A, NLGN1, DPYSL2, HSPA8, CACNA1C, NAPA, PDIA4, MIDN, RAB3A, APP, GRM2, VSNL1, STXBP4, …	1325	966	16130	1.53745	7.44599e-05	7.10048e-05
GOTERM_BP	GO:0007009~plasma membrane organization	48	1.35199e-06	-5.86902	IKBKB, ROCK2, MTSS2, MYADM, SYS1, RAPGEF2, FGF13, ANK3, VAMP3, PPP2R5A, TMEM150A, CRB1, SGIP1, MYO5A, STXBP1, PTEN, BAIAP2, EFR3B, CXCR4, KCNIP4, CLIP3, ATP1B1, TESC, RANGRF, NSF, CNST, EHD3, RAMP2, GOLGA7B, PPP1R9B, ANO3, SPTBN1, SH3GLB1, PRKCZ, FLNA, PACSIN1, SYT7, RAB13, SPTBN4, CIB1, TSPAN17, KALRN, TTC7B, KCNB2, RACK1, CACNB2, PTCH1, CACNB3	1325	277	16130	2.1095	7.44599e-05	7.10048e-05
GOTERM_BP	GO:0098655~cation transmembrane transport	95	1.39439e-06	-5.85562	CBARP, F2R, CACNA2D1, ATP6V0E1, ERO1A, MYO5A, TMEM37, TRPV4, ASIC4, UBASH3B, KCNJ12, NCS1, TMEM63C, BAX, CACNA1I, CACNB1, GRIN2A, ATP1B1, SCN2B, SCN10A, CACNA1F, KCNK9, EHD3, AMIGO1, COX5A, TRPC5, CAB39, KCNAB2, SLC8A2, TMCO1, COX7A2L, SRI, CACNA1D, CNNM4, CACNA1E, KCNJ6, OPRM1, SCN8A, KCNA1, JPH3, NEDD4L, NOS1AP, CORO1A, ATP13A2, DENND5A, ATP6V0A2, KCNB2, CHP1, NTSR1, CACNB2, HCN1, CACNB3, CRHR1…	1325	703	16130	1.64508	7.5858e-05	7.2338e-05
GOTERM_BP	GO:0016358~dendrite development	37	1.71277e-06	-5.7663	PPP1R9A, NEURL1, DLG4, RAPGEF2, ACSL4, MEF2A, PAK2, SIPA1L1, MAPK8IP2, NGEF, PTEN, GRIP1, BAIAP2, SHANK3, CAMK1, ID1, NLGN1, CAMK2B, EZH2, PLK2, CPEB3, APOE, TRPC5, TIAM1, PPP1R9B, APP, CDK5R1, MAP6, BTBD3, PACSIN1, DAB1, CDKL5, CAMK2A, SRCIN1, KALRN, MINK1, CRTC1	1325	190	16130	2.37065	9.09602e-05	8.67395e-05
GOTERM_BP	GO:0022898~regulation of transmembrane transporter activity	37	1.71277e-06	-5.7663	CBARP, DLG4, JPH1, CNIH2, ANK3, CACNA2D1, MAPK8IP2, MYO5A, KCNAB1, SHANK3, PTK2B, NLGN1, CACNB1, ATP1B1, TESC, SCN2B, RANGRF, EHD3, CAB39, PTPN3, HTT, PRKCE, SRI, CACNA1D, OPRM1, JPH3, NEDD4L, CAMK2D, NOS1AP, RASGRF1, MINK1, CHP1, NTSR1, CACNB2, CACNB3, CRHR1, PPIF	1325	190	16130	2.37065	9.09602e-05	8.67395e-05
GOTERM_BP	GO:0010977~negative regulation of neuron projection development	29	1.80452e-06	-5.74364	SEMA5A, RAPGEF2, FGF13, SEMA6B, STX1B, NGEF, IFRD1, PRKCSH, SEMA4F, PTEN, TRPV4, RTN4, FKBP4, SEMA4B, LINGO1, ID1, NLGN1, INPP5J, PLXNA3, PLK2, APOE, TRPC5, THY1, GFAP, CDK5R1, DAB1, CIB1, RGMA, GDI1	1325	130	16130	2.71565	9.47056e-05	9.0311e-05
GOTERM_BP	GO:0017157~regulation of exocytosis	35	2.09754e-06	-5.67829	CBARP, ATP6AP1, SYT3, RAB3D, VAMP3, STX1B, STXBP1, RIMS3, UNC13D, RIMS1, NLGN1, NOTCH1, NCS1, CACNA1I, NSF, NAPA, SCAMP5, RAB27B, RAB3A, SYT16, ABR, BRAF, FER, DOC2A, VSNL1, SYT7, PCLO, CPLX2, RALB, RAB3B, NAPB, ATP13A2, PRKN, DOC2B, STXBP5	1325	176	16130	2.42088	0.000108804	0.000103755
GOTERM_BP	GO:1990778~protein localization to cell periphery	41	2.80258e-06	-5.55244	IKBKB, ROCK2, NUBP1, LIN7B, MYADM, SYS1, RAPGEF2, FGF13, ANK3, VAMP3, PPP2R5A, TMEM150A, MYO5A, STXBP1, EFR3B, KCNIP4, CLIP3, ATP1B1, TESC, RANGRF, NSF, CNST, EHD3, RAMP2, GOLGA7B, PPP1R9B, SPTBN1, PRKCZ, FLNA, PACSIN1, RAB13, SPTBN4, CIB1, TSPAN17, KALRN, TTC7B, KCNB2, RACK1, CACNB2, PTCH1, CACNB3	1325	226	16130	2.20848	0.000143705	0.000137037
GOTERM_BP	GO:0048588~developmental cell growth	36	3.59993e-06	-5.44371	SEMA5A, UNC13A, ULK1, SYT3, FGF13, SEMA6B, IFRD1, SEMA4F, MAP2K4, RTN4, BMPR2, SEMA4B, RIMS1, PLXNA3, CPNE1, CPNE5, EFNA5, TRPC5, TIAM1, GSK3A, PLXNA2, MEGF8, APP, SIRT6, CDK5R1, PLXNA1, SORBS2, PRKCZ, NEDD4L, CAMK2D, CDKL5, RGMA, PRKN, CPNE9, CRABP2, RND2	1325	188	16130	2.33111	0.000182196	0.000173741
GOTERM_BP	GO:0032409~regulation of transporter activity	38	3.63493e-06	-5.4395	CBARP, DLG4, JPH1, CNIH2, ANK3, CACNA2D1, MAPK8IP2, MYO5A, KCNAB1, SHANK3, PTK2B, NLGN1, CACNB1, ATP1B1, TESC, SCN2B, RANGRF, EHD3, CAB39, PTPN3, HTT, PRKCE, SRI, CACNA1D, OPRM1, JPH3, NEDD4L, CAMK2D, NOS1AP, RASGRF1, NDFIP1, MINK1, CHP1, NTSR1, CACNB2, CACNB3, CRHR1, PPIF	1325	204	16130	2.26763	0.000182196	0.000173741
GOTERM_BP	GO:0048168~regulation of neuronal synaptic plasticity	16	3.90144e-06	-5.40878	UNC13A, APOE, NEURL1, DLG4, KRAS, SLC8A2, RAB3A, JPH3, SHANK3, RASGRF1, NETO1, CAMK2A, KALRN, SYNGR1, GRM5, CAMK2B	1325	48	16130	4.05786	0.000193143	0.000184181
GOTERM_BP	GO:0010959~regulation of metal ion transport	52	3.93992e-06	-5.40451	CBARP, F2R, STC2, CACNA2D1, MYO5A, UBASH3B, BAX, CACNB1, ATP1B1, CAMK2B, SCN2B, EHD3, AMIGO1, CAB39, KCNAB2, SRI, CACNA1D, JPH3, NEDD4L, SARAF, NOS1AP, SPTBN4, CORO1A, CAMK2A, CHP1, NTSR1, CACNB2, CACNB3, CRHR1, JPH1, ANK3, KCNAB1, PTK2B, KCNIP4, TESC, RANGRF, DRD1, CACNA1C, PTPN3, HTT, CASK, THY1, PRKCE, CACNA2D3, FLNA, CAMK2D, GNAO1, ATP2B2, SLC8A1, ATP1A1, ADCYAP1R1, KCNC1	1325	322	16130	1.96592	0.000193143	0.000184181
GOTERM_BP	GO:0016079~synaptic vesicle exocytosis	22	4.34409e-06	-5.3621	DNAJC5, UNC13A, SYT3, NAPA, RAB3A, STX1B, SYT16, BRAF, STXBP1, RIMS3, ADGRL1, DOC2A, SYNJ1, SYT7, PCLO, CPLX2, RIMS1, NAPB, PIP5K1C, NLGN1, DOC2B, SNAP47	1325	86	16130	3.11417	0.000210641	0.000200867
GOTERM_BP	GO:0010942~positive regulation of cell death	83	4.47226e-06	-5.34947	F2R, RAPGEF2, HYAL2, ANP32B, MAP3K10, PAK2, CTNNA1, ARHGEF9, MAP3K9, PTEN, ARHGEF11, CDK4, CNR1, APBB1, MARK4, BMP2, CLIP3, NOTCH1, BAX, GRIN2A, FBXW7, MCF2L, IL12A, TGFBR1, APOE, TFDP1, TIAM1, NUPR1, CSRNP3, BCL2L10, TXNIP, ABR, HSPE1, SH3GLB1, OBSCN, YWHAG, RPS6, CAMK2A, PRKN, KALRN, SOX4, PPP3R1, CAMK1D, RACK1, NTSR1, RASSF2, CHEK2, APBB2, DNAJA1, PPIF, RPS3, BCL6, NEURL1, AIMP2, RASGRF2, TLE5…	1325	607	16130	1.66459	0.000214524	0.00020457
GOTERM_BP	GO:0072659~protein localization to plasma membrane	38	5.16859e-06	-5.28663	IKBKB, ROCK2, MYADM, SYS1, RAPGEF2, FGF13, ANK3, VAMP3, PPP2R5A, TMEM150A, MYO5A, STXBP1, EFR3B, KCNIP4, CLIP3, ATP1B1, TESC, RANGRF, NSF, CNST, EHD3, RAMP2, GOLGA7B, PPP1R9B, SPTBN1, PRKCZ, FLNA, PACSIN1, RAB13, SPTBN4, CIB1, TSPAN17, TTC7B, KCNB2, RACK1, CACNB2, PTCH1, CACNB3	1325	207	16130	2.23476	0.000245288	0.000233906
GOTERM_BP	GO:1903530~regulation of secretion by cell	85	5.82976e-06	-5.23435	CBARP, F2R, UNC13A, SYT3, PPP1R9A, HYAL2, RAB3D, CD276, VAMP3, STXBP1, HADH, RIMS3, TRPV4, CNR1, APBB1, C1QTNF1, DNAJC1, OXCT1, NOTCH1, NCS1, CACNA1I, MPC2, EFNA5, TIAM1, RAB27B, SPTBN1, CRY1, SRI, CACNA1D, CACNA1E, OPRM1, SYT16, ABR, SOX11, PRKCZ, DOC2A, PCLO, CPLX2, RALB, PNKD, CAMK2A, NAPB, ATP13A2, PRKN, SOX4, STXBP5, NTSR1, SCG5, CRHR1, ATP6AP1, KCNA2, UCP2, DISP1, STX1B, C2CD2L, SNCG, ARRB1…	1325	630	16130	1.64247	0.000273753	0.000261051
GOTERM_BP	GO:0016310~phosphorylation	239	5.99588e-06	-5.22215	F2R, MYADM, PI4KA, FGF13, KRAS, SMAD5, PAK2, CDK4, ADRA1B, CDK15, STK36, CXCR4, PRMT5, IL12A, COX5A, APOE, TGFBR1, UHMK1, DUSP22, MAPKAPK3, MDFI, COX7A2L, AMBRA1, PPARGC1B, PGAM1, PKLR, PIP5K1C, LRRC4B, CHP1, DNAJA1, CHEK2, RPTOR, PPIF, RPS3, PSMA2, DGKH, NDUFA10, CDK6, RASGRF2, AAK1, PAK6, TWF1, DTYMK, MYC, SHANK3, COA6, EZH2, ADARB1, ENO3, HIPK2, RPS6KA2, APP, SIRT6, NCK1, CAMK2D, CIB1, SRCIN1,…	1325	2229	16130	1.30529	0.00027624	0.000263422
GOTERM_BP	GO:0031345~negative regulation of cell projection organization	31	6.00657e-06	-5.22137	SEMA5A, RAPGEF2, FGF13, RAP1GAP, SEMA6B, STX1B, NGEF, IFRD1, PRKCSH, SEMA4F, PTEN, TRPV4, RTN4, FKBP4, TBC1D30, SEMA4B, LINGO1, ID1, NLGN1, INPP5J, PLXNA3, PLK2, APOE, TRPC5, THY1, GFAP, CDK5R1, DAB1, CIB1, RGMA, GDI1	1325	153	16130	2.46654	0.00027624	0.000263422
GOTERM_BP	GO:0010769~regulation of cell morphogenesis involved in differentiation	53	8.15701e-06	-5.08847	PPP1R9A, MYADM, RAPGEF2, FGF13, SEMA6B, PPP2CA, PTEN, RTN4, DAG1, BAIAP2, SEMA4B, BMP2, LINGO1, ID1, NOTCH1, PLXNA3, CAMK2B, EFNA5, AMIGO1, TGFBR1, TRPC5, APOE, TIAM1, PLXNA2, MEGF8, DAB1, CDKL5, KALRN, SEMA5A, SIPA1L1, NGEF, IFRD1, SEMA4F, BMPR2, SHANK3, UNC13D, SSH1, NLGN1, DPYSL2, EZH2, CHN1, THY1, CDK5R1, BRAF, PLXNA1, FLNA, CIB1, RGMA, SRCIN1, CRABP2, GDI1, RND2, DACT3	1325	339	16130	1.90324	0.00037131	0.000354081
GOTERM_BP	GO:0051588~regulation of neurotransmitter transport	18	8.37924e-06	-5.0768	UNC13A, PPP1R9A, NAPA, RAB3A, GFAP, STX1B, SNCG, BRAF, STXBP1, RIMS3, PNKD, RAB3B, CAMK2A, RIMS1, NAPB, NLGN1, PRKN, DRD1	1325	63	16130	3.47817	0.000377574	0.000360053
GOTERM_BP	GO:0006812~cation transport	119	9.6972e-06	-5.01335	F2R, FGF13, SLC17A6, CACNA2D1, ERO1A, MYO5A, TRPV4, ASIC4, UBASH3B, KCNJ12, NCS1, TMEM63C, CACNA1I, SCN2B, SCN10A, CACNA1F, EHD3, AMIGO1, COX5A, SLC8A2, TMCO1, COX7A2L, CACNA1E, SLC10A7, OPRM1, CNNM4, JPH3, CORO1A, ATP13A2, KCNB2, CHP1, HCN1, CRHR1, PPIF, KCNA2, KCNJ9, ATP6V1E1, MCOLN2, FKBP4, COA6, TESC, RAMP2, KCNN1, CACNA1C, PTPN3, HTT, KCNQ2, CACNA2D3, CAMK2D, GNAO1, SLC8A1, NDFIP1, ADCYAP1R1…	1325	975	16130	1.4858	0.000432592	0.000412519
GOTERM_BP	GO:0046903~secretion	131	9.9353e-06	-5.00282	F2R, DNAJC5, SYT3, HYAL2, RAB3D, ACSL4, CD276, MYO5A, HADH, TRPV4, CNR1, DNAJC1, NCS1, TNFSF13B, NOTCH1, CACNA1I, VIP, EFNA5, SPTBN1, CACNA1E, OPRM1, ADGRL1, PRKCZ, ARL4D, PCLO, CPLX2, SYNJ1, PNKD, CORO1A, PIP5K1C, ATP13A2, NAPB, STXBP5, CHP1, ABCC4, SCG5, SNAP47, CRHR1, KCNA2, NEURL1, STX1B, C2CD2L, CLOCK, MYC, NISCH, SCAMP1, HIF1A, NLGN1, DPYSL2, HSPA8, CHRM3, CACNA1C, NAPA, PDIA4, MIDN, RAB3A,…	1325	1098	16130	1.4524	0.000438826	0.000418463
GOTERM_BP	GO:0051056~regulation of small GTPase mediated signal transduction	48	1.1449e-05	-4.94123	BCL6, F2R, ARHGEF10L, RAP1GAP, RASGRF2, SRGAP3, KRAS, PLEKHG5, GARNL3, SIPA1L1, NGEF, RHOF, STMN3, ARRB1, RHOBTB2, ARHGEF9, ARHGEF11, ARHGAP11A, DENND1A, ARHGAP12, SHOC2, PSD, IQSEC2, MCF2L, ARFGEF2, CHN1, DNMBP, APOE, SH2B2, TIAM1, RALGPS1, MYO9B, ARHGAP44, ABR, MYO9A, SCAI, OBSCN, CAMK2D, IQSEC1, IQSEC3, ARHGAP42, GPR65, RASGRF1, ARPP19, KALRN, TRIP10, GDI1, ARHGAP17	1325	299	16130	1.95429	0.000500727	0.000477492
GOTERM_BP	GO:0051046~regulation of secretion	89	1.34271e-05	-4.87202	CBARP, F2R, UNC13A, SYT3, PPP1R9A, HYAL2, ACSL4, RAB3D, CD276, VAMP3, STXBP1, HADH, RIMS3, TRPV4, CNR1, APBB1, C1QTNF1, DNAJC1, OXCT1, NOTCH1, NCS1, CACNA1I, TNFRSF11A, MPC2, EFNA5, TIAM1, RAB27B, SPTBN1, CRY1, SRI, CACNA1D, CACNA1E, OPRM1, SYT16, ABR, SOX11, PRKCZ, DOC2A, PCLO, CPLX2, RALB, PNKD, CAMK2A, NAPB, ATP13A2, PRKN, SOX4, STXBP5, NTSR1, SCG5, CRHR1, ATP6AP1, KCNA2, UCP2, DISP1, STX1B, C…	1325	683	16130	1.58631	0.000579125	0.000552252
GOTERM_BP	GO:0055085~transmembrane transport	152	1.35012e-05	-4.86963	F2R, SLC17A6, ABCG4, CACNA2D1, MAPK8IP2, ERO1A, MYO5A, ARHGEF9, SRP19, TRPV4, ASIC4, UBASH3B, NUP35, GABRD, KCNJ12, SVOP, NCS1, TMEM63C, CACNA1I, SCN2B, SCN10A, AQP7, CACNA1F, EHD3, GABRA4, AMIGO1, COX5A, SLC8A2, TMCO1, COX7A2L, CACNA1E, SLC10A7, OPRM1, CNNM4, JPH3, TOMM20, AQP3, CORO1A, RASGRF1, ATP13A2, ADAMTS8, KCNB2, CHP1, HCN1, ABCC4, CRHR1, PPIF, KCNA2, SLC4A3, KCNJ9, CTNS, ATP6V1E1, MYC, S…	1325	1322	16130	1.39969	0.000579125	0.000552252
GOTERM_BP	GO:0043068~positive regulation of programmed cell death	78	1.36971e-05	-4.86337	F2R, RAPGEF2, HYAL2, ANP32B, MAP3K10, PAK2, CTNNA1, ARHGEF9, MAP3K9, PTEN, ARHGEF11, CDK4, CNR1, APBB1, MARK4, BMP2, CLIP3, NOTCH1, BAX, GRIN2A, FBXW7, MCF2L, IL12A, TGFBR1, TFDP1, TIAM1, NUPR1, CSRNP3, BCL2L10, TXNIP, ABR, HSPE1, SH3GLB1, OBSCN, YWHAG, RPS6, CAMK2A, PRKN, KALRN, SOX4, PPP3R1, CAMK1D, RACK1, NTSR1, RASSF2, CHEK2, APBB2, DNAJA1, PPIF, RPS3, BCL6, NEURL1, RASGRF2, TLE5, BIN1, PLEKH…	1325	577	16130	1.64565	0.00058193	0.000554928
GOTERM_BP	GO:0060998~regulation of dendritic spine development	17	1.43393e-05	-4.84347	CPEB3, PPP1R9A, APOE, NEURL1, TIAM1, SIPA1L1, NGEF, CDK5R1, PTEN, BAIAP2, SHANK3, CAMK1, NLGN1, SRCIN1, KALRN, CAMK2B, PLK2	1325	59	16130	3.50764	0.000603469	0.000575467
GOTERM_BP	GO:0050770~regulation of axonogenesis	32	1.53006e-05	-4.81529	SEMA5A, FGF13, SEMA6B, SIPA1L1, IFRD1, SEMA4F, PTEN, RTN4, BMPR2, SEMA4B, SSH1, LINGO1, DPYSL2, PLXNA3, CHN1, EFNA5, AMIGO1, APOE, TRPC5, TIAM1, THY1, PLXNA2, MEGF8, CDK5R1, BRAF, PLXNA1, DAB1, CDKL5, RGMA, CRABP2, GDI1, RND2	1325	168	16130	2.31878	0.000637907	0.000608306
GOTERM_BP	GO:0045665~negative regulation of neuron differentiation	35	1.69048e-05	-4.77199	SEMA5A, RAPGEF2, FGF13, RAP1GAP, SEMA6B, STX1B, NGEF, IFRD1, PRKCSH, SEMA4F, PTEN, TRPV4, RTN4, FKBP4, DLL1, SEMA4B, LINGO1, ID1, NLGN1, INPP5J, NOTCH1, PLXNA3, PLK2, APOE, TRPC5, THY1, SOX8, APP, GFAP, CDK5R1, EIF4E, DAB1, CIB1, RGMA, GDI1	1325	193	16130	2.20764	0.00069826	0.00066586
GOTERM_BP	GO:0043065~positive regulation of apoptotic process	77	1.80779e-05	-4.74285	F2R, RAPGEF2, HYAL2, ANP32B, MAP3K10, PAK2, CTNNA1, ARHGEF9, MAP3K9, PTEN, ARHGEF11, CDK4, CNR1, APBB1, BMP2, CLIP3, NOTCH1, BAX, GRIN2A, FBXW7, MCF2L, IL12A, TGFBR1, TFDP1, TIAM1, NUPR1, CSRNP3, BCL2L10, TXNIP, ABR, HSPE1, SH3GLB1, OBSCN, YWHAG, RPS6, CAMK2A, PRKN, KALRN, SOX4, PPP3R1, CAMK1D, RACK1, NTSR1, RASSF2, CHEK2, APBB2, DNAJA1, PPIF, RPS3, BCL6, NEURL1, RASGRF2, TLE5, BIN1, PLEKHG5, NGE…	1325	572	16130	1.63875	0.000739867	0.000705536
GOTERM_BP	GO:0060292~long term synaptic depression	10	1.9501e-05	-4.70994	PICK1, PPP1R9A, SHANK3, PTK2B, IQSEC2, PTEN, STXBP1, DRD1, PLK2, SHANK2	1325	21	16130	5.79695	0.000790856	0.000754159
GOTERM_BP	GO:0061001~regulation of dendritic spine morphogenesis	12	1.98382e-05	-4.7025	PPP1R9A, SHANK3, TIAM1, NLGN1, SRCIN1, KALRN, SIPA1L1, NGEF, CAMK2B, CDK5R1, PTEN, BAIAP2	1325	31	16130	4.71236	0.000797282	0.000760286
GOTERM_BP	GO:0051050~positive regulation of transport	112	2.06423e-05	-4.68524	GTSE1, F2R, HYAL2, RAB3D, ANP32B, SULF2, CD276, CACNA2D1, NCBP2, TRPV4, CAMK1, NCS1, CACNA1I, FBXW7, CEP131, EHD3, AMIGO1, APOE, TFDP1, TGFBR1, SPTBN1, PRKCZ, SYNJ1, PLTP, PPM1A, ATP13A2, STXBP5, CHP1, ACTL6A, SEMA5A, STX1B, C2CD2L, MIEF2, SHANK3, HIF1A, NLGN1, DPYSL2, TESC, CNST, DNM1, HTT, RAB3A, ELMOD1, CDK5R1, VSNL1, SAE1, CIB1, ARPP19, DOC2B, HMGB1, ADCYAP1R1, KCNC1, UNC13A, VAMP3, SGIP1, ST…	1325	920	16130	1.482	0.000822192	0.00078404
GOTERM_BP	GO:0022618~ribonucleoprotein complex assembly	37	2.22117e-05	-4.65342	RPL23A, EIF3G, CLNS1A, NPM1, EIF3E, NOCT, ISY1, RPL13A, SNRPG, RPL6, RPS10, EIF5, RPS19, SNRPE, PRMT5, EIF3H, SF3A2, RUVBL1, RPS5, CNOT6, MRPL11, RPSA, RPS28, RPL12, RPL24, RPL3, RPS27L, RPL5, EIF4B, RPS14, RPS17, RPL10, EIF2D, EIF3D, EIF3F, EIF2A, RPL11	1325	212	16130	2.12464	0.00087687	0.000836181
GOTERM_BP	GO:0009966~regulation of signal transduction	280	2.36378e-05	-4.62639	F2R, RFC4, EXO1, MYADM, CNKSR2, KRAS, GARNL3, PAK2, FBXL2, ARHGEF9, ADRA1B, UBE2N, DENND1A, TRIM32, STK36, CXCR4, SHOC2, NOTCH1, IQSEC2, PRMT5, KCTD16, IL12A, APOE, TGFBR1, DUSP22, MAPKAPK3, MDFI, BCL2L10, PPARGC1B, SCAI, MMP14, IQSEC1, IQSEC3, ZEB1, PIP5K1C, LRRC4B, OTUD7A, CHP1, HMGB2, DNAJA1, CHEK2, RPTOR, PPIF, RPS3, PSMA2, SEMA5A, PLEKHA1, TLE5, RASGRF2, PLEKHG5, AAK1, STX1B, AKAP11, MYC, SH…	1325	2728	16130	1.24949	0.000924986	0.000882064
GOTERM_BP	GO:0042274~ribosomal small subunit biogenesis	18	2.50897e-05	-4.6005	TSR2, RPS8, RPS24, RPS5, RPS7, RPSA, RPS28, RPS27L, FCF1, RPS6, RPS10, SNU13, EMG1, RPS16, RRS1, RPS19, RPS14, RPS17	1325	68	16130	3.22242	0.000968792	0.000923838
GOTERM_BP	GO:0022604~regulation of cell morphogenesis	76	2.51916e-05	-4.59874	TBC1D22B, UNC13A, SYT3, PPP1R9A, MYADM, RAPGEF2, FGF13, CAMSAP1, SEMA6B, PPP2CA, PTEN, RTN4, DAG1, BAIAP2, SEMA4B, BMP2, LINGO1, ID1, NOTCH1, PLXNA3, CAMK2B, EFNA5, AMIGO1, TGFBR1, TRPC5, APOE, TIAM1, PLXNA2, MEGF8, NEDD4L, DAB1, CDKL5, CORO1A, PRKN, KALRN, KCTD17, CPNE9, GNA12, SEMA5A, SIPA1L1, NGEF, IFRD1, SEMA4F, CDC42SE2, CDC42EP4, BMPR2, TBC1D30, SHANK3, UNC13D, CORO1B, SSH1, PTK2B, RIMS1, N…	1325	568	16130	1.62886	0.000968792	0.000923838
GOTERM_BP	GO:0008361~regulation of cell size	32	2.78504e-05	-4.55517	SEMA5A, FGF13, CLNS1A, SEMA6B, IFRD1, SEMA4F, PTEN, CDK4, TRPV4, AQP1, RTN4, BMPR2, SHANK3, SEMA4B, DPYSL2, PLXNA3, AQP7, EFNA5, APOE, TRPC5, RB1CC1, PLXNA2, MEGF8, CDK5R1, PLXNA1, CDKL5, AQP3, RGMA, ATP2B2, CRABP2, RND2, RPTOR	1325	173	16130	2.25176	0.00106189	0.00101261
GOTERM_BP	GO:0090002~establishment of protein localization to plasma membrane	28	3.06504e-05	-4.51356	IKBKB, ROCK2, MYADM, SYS1, ANK3, VAMP3, PPP2R5A, TMEM150A, EFR3B, CLIP3, ATP1B1, TESC, RANGRF, NSF, CNST, EHD3, PPP1R9B, SPTBN1, PACSIN1, RAB13, SPTBN4, CIB1, TSPAN17, TTC7B, KCNB2, RACK1, CACNB2, PTCH1	1325	142	16130	2.40043	0.00115246	0.00109898
GOTERM_BP	GO:0051494~negative regulation of cytoskeleton organization	25	3.07426e-05	-4.51226	NUBP1, PPP1R9A, MYADM, FGF13, SPTAN1, NPM1, TWF1, FHOD3, FKBP4, SHANK3, CORO1B, INPP5J, CLIP3, LIMA1, PICK1, PFN1, SPTBN1, SPTBN2, WASF2, SPTBN4, CORO1A, CIB1, PRKN, MAPRE1, TRIM37	1325	119	16130	2.55748	0.00115246	0.00109898
GOTERM_BP	GO:0006887~exocytosis	58	3.7839e-05	-4.42206	CBARP, DNAJC5, UNC13A, SYT3, LIN7B, RAB3D, VAMP3, MYO5A, STXBP1, RIMS3, NOTCH1, NCS1, CACNA1I, ARFGEF2, RAB27B, SYT16, ARHGAP44, ABR, ADGRL1, DOC2A, SYNJ1, PCLO, CPLX2, RAB13, RALB, CORO1A, NAPB, PIP5K1C, ATP13A2, PRKN, STXBP5, RAB11FIP2, CHP1, ABCC4, SNAP47, ATP6AP1, EXOC8, STX1B, FAM3C, UNC13D, SCAMP1, RIMS1, NLGN1, CDK16, NSF, NAPA, SCAMP5, RAB3A, APP, BRAF, FER, RAB11FIP5, FLNA, VSNL1, SYT7, …	1325	404	16130	1.74769	0.00140666	0.00134139
GOTERM_BP	GO:0044770~cell cycle phase transition	73	4.09955e-05	-4.38726	GTSE1, UBE2C, TIPIN, CKS1B, PTEN, CDK4, DGKZ, PSMD8, PHLDA1, MARK4, MCM8, PRIM2, BAX, CCNY, FBXW7, CEP131, HAUS6, CDK5RAP3, TFDP1, CEP72, MCM3, PPP1R9B, CDK14, SOX11, EIF4E, YWHAG, WEE1, RPS6, EIF4EBP1, CAMK2A, RBM38, SOX4, TAOK3, MCM5, CHEK2, RPTOR, PSMA2, PSME1, ACVR1B, CDK6, RCC1, TYMS, HAUS1, NPM1, PRKAR2B, USH1C, CDC20, ZFP36L2, RAD51B, ORC1, PSMC1, RBL2, EZH2, TP53, PLK2, MTA3, PHB2, TCF3, …	1325	547	16130	1.62463	0.00151141	0.00144128
GOTERM_BP	GO:0046928~regulation of neurotransmitter secretion	15	4.2082e-05	-4.3759	UNC13A, PPP1R9A, NAPA, RAB3A, STX1B, SNCG, BRAF, STXBP1, RIMS3, PNKD, CAMK2A, RIMS1, NAPB, NLGN1, PRKN	1325	51	16130	3.58047	0.00153875	0.00146735
GOTERM_BP	GO:0044772~mitotic cell cycle phase transition	69	5.65428e-05	-4.24762	GTSE1, UBE2C, CKS1B, PTEN, CDK4, DGKZ, PSMD8, PHLDA1, MARK4, MCM8, PRIM2, BAX, CCNY, CEP131, HAUS6, CDK5RAP3, TFDP1, CEP72, MCM3, PPP1R9B, CDK14, EIF4E, YWHAG, WEE1, RPS6, EIF4EBP1, CAMK2A, RBM38, SOX4, TAOK3, MCM5, CHEK2, RPTOR, PSMA2, PSME1, ACVR1B, CDK6, RCC1, TYMS, HAUS1, NPM1, PRKAR2B, USH1C, CDC20, ZFP36L2, RAD51B, ORC1, PSMC1, RBL2, EZH2, TP53, PLK2, MTA3, PHB2, TCF3, PCNA, APP, CNTRL, CNO…	1325	514	16130	1.6342	0.00205071	0.00195555
GOTERM_BP	GO:0097421~liver regeneration	11	6.2982e-05	-4.20078	PCNA, PTPN3, TYMS, SULF2, RPS24, RPS16, UCP2, RPL19, PRMT5, MYC, EZH2	1325	29	16130	4.61757	0.00226583	0.00216069
GOTERM_BP	GO:0061178~regulation of insulin secretion involved in cellular response to glucose stimulus	15	6.69903e-05	-4.17399	TIAM1, PRKCE, UCP2, SRI, C2CD2L, ARRB1, VSNL1, GPR68, STXBP4, HIF1A, OXCT1, CDK16, NR1D1, MPC2, EFNA5	1325	53	16130	3.44535	0.00239075	0.00227982
GOTERM_BP	GO:0019220~regulation of phosphate metabolic process	175	6.8664e-05	-4.16327	F2R, UBE2C, MYADM, HYAL2, FGF13, KRAS, GNAI3, PAK2, MAPK8IP2, MAP3K9, CKS1B, CDK4, TRPV4, ADRA1B, UBASH3B, LDB2, CAMK1, CXCR4, CCNY, FBXW7, PCIF1, PRMT5, VIP, IL12A, CDK5RAP3, EFNA5, AKAP12, APOE, TGFBR1, DUSP22, MAPKAPK3, MDFI, AMBRA1, OPRM1, PPARGC1B, DLG2, LRRK1, PGAM1, PRKCZ, PIK3CB, LRRC4B, CHP1, RASSF2, ADCY1, CHEK2, DNAJA1, CRHR1, PPIF, RPTOR, RPS3, MAPK10, NEURL1, TWF1, NIFK, MYC, UBE2K, …	1325	1610	16130	1.32322	0.00242856	0.00231587
GOTERM_BP	GO:0051493~regulation of cytoskeleton organization	59	6.91386e-05	-4.16028	ROCK2, PPP1R9A, MYADM, ARHGEF10L, SPTAN1, FGF13, STMN4, ACTR3B, STMN3, TRPV4, BAIAP2, ID1, CLIP3, PLXNA3, CEP131, EFNA5, LIMA1, TGFBR1, SPTBN1, SPTBN2, WASF2, SPTBN4, CORO1A, GPR65, PRKN, SPICE1, RPS3, NUBP1, SEMA5A, NPM1, CCSAP, TWF1, FHOD3, CDC42EP4, FKBP4, SHANK3, NCKAP1, SORBS3, CORO1B, SSH1, PTK2B, INPP5J, PLK2, PPM1E, MAPK1, PICK1, PFN1, PRKCE, CDK5R1, BRAF, FER, NCK1, DCTN1, IQGAP2, CIB1, …	1325	422	16130	1.70199	0.00242856	0.00231587
GOTERM_BP	GO:1902803~regulation of synaptic vesicle transport	12	7.19538e-05	-4.14295	NAPA, CNIH2, DNM1, RIMS1, NAPB, NLGN1, RAB3A, PRKN, STX1B, BRAF, STXBP1, RIMS3	1325	35	16130	4.1738	0.0025077	0.00239134
GOTERM_BP	GO:0051650~establishment of vesicle localization	39	7.82282e-05	-4.10664	DNAJC5, UNC13A, SYT3, CNIH2, STX1B, MYO5A, STXBP1, RIMS3, DENND1A, RIMS1, NLGN1, DPYSL2, SH3GL2, NSF, KIFAP3, AP1M2, NAPA, DNM1, RAB27B, HTT, LMAN1, RAB3A, SYT16, BRAF, ADGRL1, PRKCZ, DOC2A, PACSIN1, SYNJ1, DCTN1, SYT7, PCLO, CPLX2, SEC13, NAPB, PIP5K1C, DOC2B, SNAP47, AP3M1	1325	242	16130	1.96186	0.00270524	0.00257971
GOTERM_BP	GO:1903047~mitotic cell cycle process	106	8.40666e-05	-4.07538	GTSE1, UBE2C, MCMBP, ZNF365, CKS1B, CDK4, MIS12, NUP35, MCM8, CCNY, CEP131, CDK5RAP3, TFDP1, NUP37, SPTBN1, EIF4E, WEE1, EIF4EBP1, SEPTIN2, MCM5, CHEK2, AAAS, RPTOR, RPS3, PSMA2, SNX18, CDK6, DYNLT3, RAD51B, RRS1, PSMC1, RBL2, EZH2, MYBL2, PLK2, PHB2, HTT, NCAPD2, APP, PHF8, CNOT6, CAMK2D, CKS2, KLHL13, ARPP19, CHMP1B, TOM1L2, TIPIN, PTEN, PPP2CA, DGKZ, PSMD8, PHLDA1, MARK4, BAX, PRIM2, HAUS6, MC…	1325	890	16130	1.44989	0.00288478	0.00275092
GOTERM_BP	GO:0050768~negative regulation of neurogenesis	39	0.000102116	-3.9909	SEMA5A, RAPGEF2, FGF13, RAP1GAP, SEMA6B, STX1B, NGEF, CTNNA1, IFRD1, PRKCSH, SEMA4F, PTEN, TRPV4, RTN4, FKBP4, DLL1, STAT3, SEMA4B, LINGO1, ID1, NLGN1, INPP5J, NOTCH1, PLXNA3, PLK2, APOE, TRPC5, THY1, SOX8, APP, GFAP, CDK5R1, SOX11, EIF4E, DAB1, CIB1, RGMA, BRINP1, GDI1	1325	245	16130	1.93784	0.00347574	0.00331446
GOTERM_BP	GO:2000463~positive regulation of excitatory postsynaptic potential	9	0.000103622	-3.98455	SHANK3, DLG4, RIMS1, PTK2B, NETO1, NLGN1, STX1B, PTEN, PRKCZ	1325	20	16130	5.47811	0.00347574	0.00331446
GOTERM_BP	GO:0007015~actin filament organization	49	0.000103626	-3.98453	ROCK2, PPP1R9A, MYADM, ARHGEF10L, SPTAN1, ACTR3B, RHOF, CTNNA1, TRPV4, BAIAP2, ID1, LIMA1, TGFBR1, PPP1R9B, SPTBN1, PPARGC1B, MSRB1, SORBS2, SPTBN2, WASF2, TPM3, SPTBN4, CORO1A, GPR65, PRKN, SEMA5A, TWF1, ARRB1, FHOD3, CDC42EP4, SHANK3, NCKAP1, SORBS3, CORO1B, PTK2B, PPM1E, CORO7, PICK1, PFN1, MICAL1, PRKCE, BRAF, FER, FLNA, PACSIN1, NCK1, IQGAP2, WASF1, INPPL1	1325	335	16130	1.78061	0.00347574	0.00331446
GOTERM_BP	GO:0055082~cellular chemical homeostasis	88	0.000109604	-3.96017	F2R, GPR12, STC2, DLG4, PDK3, CACNA2D1, ATP6V0E1, ERO1A, MYO5A, TRPV4, ADRA1B, UBASH3B, C1QTNF1, OXCT1, CXCR4, HMOX2, BAX, ATP1B1, PTPRN2, AQP7, MPC2, TRPC5, APOE, SLC8A2, TMCO1, SRI, OPRM1, JPH3, TPT1, NEDD4L, PIK3CB, SV2A, CORO1A, GPR65, AQP3, ATP13A2, DMXL2, KCTD17, ATP6V0A2, SOX4, RAB11FIP2, CHP1, RACK1, NTSR1, CACNB3, NUBP1, JPH1, C19orf12, SLC17A7, SLC4A3, UCP2, CCR9, C2CD2L, ATP6V1E1, ARRB…	1325	713	16130	1.50249	0.00364883	0.00347952
GOTERM_BP	GO:1902531~regulation of intracellular signal transduction	183	0.000114003	-3.94308	RFC4, F2R, EXO1, MYADM, HYAL2, KRAS, GARNL3, GPAT3, MAPK8IP2, FBXL2, MYO5A, RHOBTB2, ARHGEF9, MAP3K9, ARHGEF11, TRPV4, DENND1A, ADRA1B, UBE2N, TRIM32, SHOC2, CXCR4, NOTCH1, IQSEC2, FBXW7, MCF2L, PRMT5, CPNE1, IL12A, CDK5RAP3, AKAP12, APOE, TGFBR1, DUSP22, MAPKAPK3, RALGPS1, MDFI, BCL2L10, OPRM1, JPH3, SCAI, OBSCN, LRRK1, PRKCZ, IQSEC3, IQSEC1, PIK3CB, PPM1A, RASGRF1, PIP5K1C, LRRC4B, OTUD7A, KALR…	1325	1714	16130	1.29975	0.00376716	0.00359236
GOTERM_BP	GO:0034622~cellular macromolecular complex assembly	116	0.000134673	-3.87072	UBE2C, MYADM, FGF13, ANP32B, MAP7D3, ZFYVE9, MAPK8IP2, NOCT, RTN4, SRP19, TRPV4, BAIAP2, MIS12, RPL13A, PRMT5, EFNA5, EIF3H, SF3A2, SPTBN1, MSRB1, MRPL11, RPSA, SYNJ1, TOMM20, PPM1A, CORO1A, DMXL2, RPS14, HMGB2, SNAP47, RPS3, RPL23A, NDUFA10, EIF3G, TWF1, CDC42EP4, FKBP4, UBE2K, NCKAP1, NDUFB8, SNRPG, RAD51B, COA6, PSMC1, RPS19, PFN1, DNM1, RPS5, CNOT6, NCK1, POLR1E, WASF1, RPL5, PXN, HMGB1, COA4…	1325	1004	16130	1.40651	0.00441748	0.0042125
GOTERM_BP	GO:0000082~G1/S transition of mitotic cell cycle	36	0.000162693	-3.78863	GTSE1, ACVR1B, CDK6, RCC1, TYMS, NPM1, PTEN, CDK4, DGKZ, MARK4, ORC1, BAX, MCM8, PRIM2, RBL2, EZH2, TP53, PLK2, TFDP1, PCNA, MCM3, CNOT6, MCM10, PHF8, EIF4E, CAMK2D, RPS27L, RPS6, EIF4EBP1, E2F7, CAMK2A, RBM38, SOX4, MCM5, CHEK2, RPTOR	1325	224	16130	1.95647	0.00528741	0.00504206
GOTERM_BP	GO:0007215~glutamate receptor signaling pathway	17	0.000163565	-3.78631	DLG4, CNIH2, MAPK8IP2, APP, GRM2, GRM3, OPRM1, CDK5R1, GRIN2B, SHANK3, RASGRF1, PTK2B, NLGN1, GRIN2A, MINK1, GRM5, HOMER3	1325	71	16130	2.9148	0.00528741	0.00504206
GOTERM_BP	GO:0010563~negative regulation of phosphorus metabolic process	70	0.00018297	-3.73762	ROCK2, UBE2C, MYADM, HYAL2, PRKAR1A, GNAI3, PPP2R5A, PAK2, GRM3, ZFYVE28, PPP2CA, PTEN, DAG1, UBASH3B, STAT3, BAX, PCIF1, DUSP8, PKN1, CDK5RAP3, APOE, DUSP22, CSRNP3, PPP1R9B, DLG3, OPRM1, DLG2, PRKCZ, LRRK1, YWHAG, PPP4R4, PRKN, LRRC4B, CHP1, MAPK8IP1, TAOK3, RACK1, PPP1R15A, RASSF2, DNAJA1, PPIF, IKBKB, RTN4RL1, NPM1, NIFK, ARRB1, MYC, PRKAR2B, INPP5J, TESC, CNST, PPM1E, CBFA2T3, ADARB1, GABBR2…	1325	544	16130	1.56645	0.00583021	0.00555968
GOTERM_BP	GO:0045936~negative regulation of phosphate metabolic process	70	0.00018297	-3.73762	ROCK2, UBE2C, MYADM, HYAL2, PRKAR1A, GNAI3, PPP2R5A, PAK2, GRM3, ZFYVE28, PPP2CA, PTEN, DAG1, UBASH3B, STAT3, BAX, PCIF1, DUSP8, PKN1, CDK5RAP3, APOE, DUSP22, CSRNP3, PPP1R9B, DLG3, OPRM1, DLG2, PRKCZ, LRRK1, YWHAG, PPP4R4, PRKN, LRRC4B, CHP1, MAPK8IP1, TAOK3, RACK1, PPP1R15A, RASSF2, DNAJA1, PPIF, IKBKB, RTN4RL1, NPM1, NIFK, ARRB1, MYC, PRKAR2B, INPP5J, TESC, CNST, PPM1E, CBFA2T3, ADARB1, GABBR2…	1325	544	16130	1.56645	0.00583021	0.00555968
GOTERM_BP	GO:0010647~positive regulation of cell communication	167	0.000186297	-3.72979	F2R, MFNG, HYAL2, KRAS, SULF2, PAK2, MAPK8IP2, MAP3K9, TRPV4, ADRA1B, UBE2N, TRIM32, STK36, SHOC2, CXCR4, NOTCH1, IQSEC2, FBXW7, MCF2L, PRMT5, CPNE1, IL12A, CDK5RAP3, AKAP12, TFDP1, TGFBR1, DUSP22, MAPKAPK3, SLC8A2, MDFI, GFAP, OPRM1, LRRK1, PRKCZ, PIK3CB, PPM1A, RASGRF1, SALL1, KALRN, RASSF2, SNAP47, PPIF, RPTOR, RPS3, PSMA2, MAPK10, SEMA5A, NEURL1, PLEKHG5, AAK1, STX1B, C2CD2L, UBE2K, SHANK3, H…	1325	1555	16130	1.30739	0.00589411	0.00562061
GOTERM_BP	GO:0086001~cardiac muscle cell action potential	16	0.000196231	-3.70723	CACNA1C, FGF13, ANK3, CACNA2D1, CACNA1D, NEDD4L, FLNA, CAMK2D, NOS1AP, SLC8A1, ATP1B1, SCN10A, SCN2B, RANGRF, ATP1A1, CACNB2	1325	65	16130	2.99657	0.00616471	0.00587865
GOTERM_BP	GO:0071322~cellular response to carbohydrate stimulus	22	0.000212403	-3.67284	PDK3, RPS6KA2, UCP2, SRI, C2CD2L, ARRB1, MYC, MAP2K4, RAB11FIP5, CALCRL, VSNL1, AACS, GPR68, HIF1A, OXCT1, PTPRN, SOX4, PTPRN2, RAB11FIP2, RACK1, PRKCB, MPC2	1325	110	16130	2.43472	0.00662608	0.00631862
GOTERM_BP	GO:0051279~regulation of release of sequestered calcium ion into cytosol	17	0.000230403	-3.63751	F2R, CACNA1C, JPH1, HTT, THY1, PRKCE, SRI, MYO5A, JPH3, UBASH3B, CAMK2D, CORO1A, PTK2B, SLC8A1, BAX, NTSR1, DRD1	1325	73	16130	2.83494	0.00713769	0.00680649
GOTERM_BP	GO:0030073~insulin secretion	27	0.000233172	-3.63232	UCP2, C2CD2L, MYO5A, ARRB1, HADH, AACS, HIF1A, OXCT1, CDK16, PTPRN2, MPC2, EFNA5, TIAM1, MIDN, PRKCE, SRI, RAB11FIP5, VSNL1, PCLO, GPR68, STXBP4, PRKN, DOC2B, PTPRN, SOX4, RAB11FIP2, NR1D1	1325	151	16130	2.17673	0.00717366	0.00684079
GOTERM_BP	GO:0099565~chemical synaptic transmission, postsynaptic	16	0.000234946	-3.62903	PPP1R9A, DLG4, GSK3A, SLC17A7, STX1B, MAPK8IP2, OPRM1, PTEN, PRKCZ, SHANK3, PTK2B, NETO1, RIMS1, NLGN1, GRIN2A, NTSR1	1325	66	16130	2.95117	0.00717873	0.00684562
GOTERM_BP	GO:0051961~negative regulation of nervous system development	40	0.000236962	-3.62532	SEMA5A, RAPGEF2, FGF13, RAP1GAP, SEMA6B, STX1B, NGEF, CTNNA1, IFRD1, PRKCSH, SEMA4F, PTEN, TRPV4, RTN4, FKBP4, DLL1, STAT3, SEMA4B, LINGO1, ID1, NLGN1, INPP5J, NOTCH1, PLXNA3, PLK2, APOE, TRPC5, THY1, SOX8, APP, GFAP, CDK5R1, NEUROD2, SOX11, EIF4E, DAB1, CIB1, RGMA, BRINP1, GDI1	1325	264	16130	1.84448	0.00719107	0.00685739
GOTERM_BP	GO:0010771~negative regulation of cell morphogenesis involved in differentiation	23	0.000245536	-3.60989	SEMA5A, TRPC5, RAPGEF2, FGF13, THY1, SEMA6B, NGEF, CDK5R1, IFRD1, PTEN, SEMA4F, PPP2CA, RTN4, DAB1, SEMA4B, LINGO1, RGMA, ID1, NLGN1, PLXNA3, GDI1, DACT3, EFNA5	1325	119	16130	2.35288	0.00740091	0.00705749
GOTERM_BP	GO:0061387~regulation of extent of cell growth	21	0.000268917	-3.57038	SEMA5A, TRPC5, APOE, FGF13, PLXNA2, MEGF8, SEMA6B, CDK5R1, IFRD1, SEMA4F, PLXNA1, RTN4, BMPR2, CDKL5, SEMA4B, RGMA, DPYSL2, PLXNA3, CRABP2, RND2, EFNA5	1325	104	16130	2.45813	0.00805127	0.00767767
GOTERM_BP	GO:0060079~excitatory postsynaptic potential	14	0.000271638	-3.56601	PPP1R9A, DLG4, SLC17A7, STX1B, MAPK8IP2, OPRM1, PTEN, PRKCZ, SHANK3, PTK2B, NETO1, RIMS1, NLGN1, GRIN2A	1325	53	16130	3.21566	0.00807853	0.00770367
GOTERM_BP	GO:0009132~nucleoside diphosphate metabolic process	22	0.000275315	-3.56017	CBFA2T3, ENO3, MPP1, HKDC1, GALK1, DLG4, CASK, PRKAA2, NUDT5, AK2, DLG3, DTYMK, SIRT6, MYC, DLG2, NME5, PGAM1, STAT3, PKLR, HIF1A, MPP2, DDIT4	1325	112	16130	2.39124	0.00813365	0.00775623
GOTERM_BP	GO:1903305~regulation of regulated secretory pathway	23	0.000277792	-3.55628	CBARP, SYT3, NAPA, SCAMP5, RAB3D, VAMP3, RAB3A, STX1B, SYT16, BRAF, STXBP1, ABR, RIMS3, FER, DOC2A, SYT7, UNC13D, RIMS1, NAPB, NLGN1, NOTCH1, DOC2B, CACNA1I	1325	120	16130	2.33327	0.00815284	0.00777453
GOTERM_BP	GO:0086010~membrane depolarization during action potential	13	0.000310529	-3.5079	CACNA1C, ANK3, CACNA2D1, CACNA1D, CACNA1E, SCN8A, SLC8A1, CACNA1I, SCN10A, SCN2B, RANGRF, CACNB2, CACNA1F	1325	47	16130	3.36716	0.00905404	0.00863392
GOTERM_BP	GO:0043549~regulation of kinase activity	93	0.000336002	-3.47366	F2R, PPP1R9A, UBE2C, RAPGEF2, HYAL2, FGF13, KRAS, PRKAR1A, MAP3K10, PPP2R5A, PAK2, ZFYVE28, MAP3K9, CKS1B, PPP2CA, PTEN, CDK4, UBASH3B, LDB2, BMP2, CAMK1, CXCR4, BAX, CCNY, FBXW7, TNFRSF11A, DUSP8, PKN1, CDK5RAP3, EFNA5, MAP3K1, TGFBR1, APOE, CAB39, TIAM1, DUSP22, MAPKAPK3, CCNG1, MDFI, AMBRA1, SH3GLB1, PRKCZ, YWHAG, MAPRE3, RALB, DAB1, PIK3CB, PRKN, LRRC4B, MAPKAPK2, AXIN1, CHP1, MAPK8IP1, TAOK3…	1325	788	16130	1.43673	0.00973314	0.0092815
GOTERM_BP	GO:0010469~regulation of receptor activity	23	0.000447029	-3.34966	NCOA3, NEURL1, DLG4, JPH1, CNIH2, HTT, PRKCE, MAPK8IP2, APP, SRI, MYO5A, PPARGC1B, OPRM1, ZFYVE28, JPH3, CAMK2D, SHANK3, RASGRF1, PTK2B, NLGN1, MINK1, FBXW7, MED13	1325	124	16130	2.258	0.0128543	0.0122578
GOTERM_BP	GO:0001731~formation of translation preinitiation complex	9	0.000449512	-3.34726	RPL13A, EIF3G, EIF4B, EIF5, EIF3E, EIF2D, EIF3D, EIF3F, EIF3H	1325	24	16130	4.56509	0.0128543	0.0122578
GOTERM_BP	GO:1990138~neuron projection extension	25	0.000474372	-3.32388	SEMA5A, UNC13A, ULK1, SYT3, SEMA6B, IFRD1, SEMA4F, RTN4, BMPR2, SEMA4B, RIMS1, PLXNA3, CPNE1, CPNE5, TRPC5, TIAM1, PLXNA2, MEGF8, CDK5R1, PLXNA1, PRKCZ, NEDD4L, CDKL5, PRKN, CPNE9	1325	141	16130	2.15844	0.0134788	0.0128534
GOTERM_BP	GO:0048814~regulation of dendrite morphogenesis	16	0.000543139	-3.26509	PPP1R9A, TRPC5, RAPGEF2, TIAM1, SIPA1L1, NGEF, CDK5R1, PTEN, BAIAP2, SHANK3, CDKL5, ID1, NLGN1, SRCIN1, KALRN, CAMK2B	1325	71	16130	2.74334	0.0153351	0.0146235
GOTERM_BP	GO:0071417~cellular response to organonitrogen compound	61	0.000578474	-3.23772	RAPGEF2, PRKAR1A, ATP6V0E1, MYO5A, CTNNA1, BAIAP2, STAT3, ID1, KLF15, GABRG2, GNG5, PPP1R9B, SIK2, OPRM1, PRKCZ, YWHAG, RAD51, GNB4, RAB13, ZEB1, EIF4EBP1, CAMK2A, PKLR, PRKN, ATP6V0A2, KLF5, HCN1, ADCY1, CRHR1, RPTOR, ATP6AP1, NEURL1, CPEB1, UCP2, RPE65, CPEB2, ATP6V1E1, PDK2, MYC, PRKAR2B, AQP1, SSH1, LAMTOR1, PDGFC, EZH2, DRD1, CPEB3, GABRA1, MAPK1, SH2B2, GSK3A, PRKAR1B, APP, FER, STXBP4, SLC…	1325	477	16130	1.55679	0.01623	0.0154769
GOTERM_BP	GO:0060999~positive regulation of dendritic spine development	11	0.000597594	-3.22359	CPEB3, PPP1R9A, APOE, NEURL1, SHANK3, TIAM1, CAMK1, NLGN1, KALRN, CAMK2B, BAIAP2	1325	37	16130	3.61917	0.0166617	0.0158885
GOTERM_BP	GO:0000027~ribosomal large subunit assembly	9	0.000613867	-3.21193	RPL12, RPL23A, RPL24, RPL3, RPL6, RPL5, RPL10, RPL11, MRPL11	1325	25	16130	4.38249	0.0169041	0.0161197
GOTERM_BP	GO:2000300~regulation of synaptic vesicle exocytosis	9	0.000613867	-3.21193	NAPA, RIMS1, NAPB, NLGN1, RAB3A, STX1B, BRAF, STXBP1, RIMS3	1325	25	16130	4.38249	0.0169041	0.0161197
GOTERM_BP	GO:0006915~apoptotic process	181	0.000618418	-3.20872	F2R, DNAJC5, DAD1, HYAL2, KRAS, ANP32B, EGR3, PAK2, ERO1A, ARHGEF9, MAP3K9, ARHGEF11, CDK4, RTN4, CNR1, TRIM32, CXCR4, NOTCH1, FBXW7, MCF2L, IL12A, CDK5RAP3, EFNA5, APOE, TFDP1, TGFBR1, DUSP22, NUPR1, BCL11B, BCL2L10, AMBRA1, UNC5A, HSPE1, OBSCN, PRKCZ, CORO1A, KALRN, RASSF2, HMGB2, CHEK2, DNAJA1, PPIF, RPS3, SEMA5A, NEURL1, RASGRF2, TLE5, PLEKHG5, PAK6, MRTFA, MYC, NME5, UBE2K, NISCH, ANXA5, NCK…	1325	1747	16130	1.26126	0.0169249	0.0161396
GOTERM_BP	GO:0051347~positive regulation of transferase activity	77	0.000660696	-3.18	RFC4, F2R, PPP1R9A, UBE2C, RAPGEF2, FGF13, KRAS, PRKAR1A, MAP3K10, NEK7, PAK2, MAP3K9, CKS1B, PPP2CA, PTEN, UBE2N, PSMD8, BMP2, CAMK1, CXCR4, BAX, CCNY, FBXW7, TNFRSF11A, PKN1, EFNA5, MAP3K1, TGFBR1, CAB39, TIAM1, MAPKAPK3, MDFI, AMBRA1, DSCC1, SH3GLB1, PRKCZ, MAPRE3, RALB, DAB1, PIK3CB, HMBOX1, MAPKAPK2, AXIN1, TAOK3, RASSF2, ADCY1, RPTOR, RPS3, PSMA2, PSME1, MAPK10, NEURL1, ARRB1, MYC, MAP2K4, …	1325	640	16130	1.46463	0.0179717	0.0171378
GOTERM_BP	GO:0050771~negative regulation of axonogenesis	15	0.000671003	-3.17328	SEMA5A, FGF13, THY1, SEMA6B, CDK5R1, IFRD1, PTEN, SEMA4F, RTN4, DAB1, SEMA4B, LINGO1, RGMA, PLXNA3, GDI1	1325	65	16130	2.80929	0.0181415	0.0172997
GOTERM_BP	GO:0010721~negative regulation of cell development	43	0.000676321	-3.16985	SEMA5A, RAPGEF2, FGF13, RAP1GAP, SEMA6B, STX1B, NGEF, CTNNA1, IFRD1, PRKCSH, SEMA4F, PPP2CA, PTEN, TRPV4, RTN4, FKBP4, DLL1, STAT3, SEMA4B, LINGO1, ID1, NLGN1, INPP5J, NOTCH1, PLXNA3, PLK2, EFNA5, APOE, TRPC5, GSK3A, THY1, SOX8, APP, GFAP, CDK5R1, SOX11, EIF4E, DAB1, CIB1, RGMA, BRINP1, GDI1, DACT3	1325	306	16130	1.71067	0.0181751	0.0173317
GOTERM_BP	GO:0010522~regulation of calcium ion transport into cytosol	18	0.000714632	-3.14592	F2R, CACNA1C, JPH1, HTT, THY1, PRKCE, SRI, MYO5A, JPH3, UBASH3B, CAMK2D, CORO1A, PTK2B, SLC8A1, BAX, ADCYAP1R1, NTSR1, DRD1	1325	88	16130	2.49005	0.0190897	0.0182039
GOTERM_BP	GO:0070507~regulation of microtubule cytoskeleton organization	22	0.000719135	-3.14319	RPS3, ROCK2, NUBP1, FGF13, STMN4, NPM1, CCSAP, STMN3, CDK5R1, TRPV4, FKBP4, DCTN1, CIB1, INPP5J, CLIP3, MAPRE1, TRIM37, CEP131, CHMP1B, PLK2, EFNA5, SPICE1	1325	120	16130	2.23182	0.0190956	0.0182095
GOTERM_BP	GO:1900006~positive regulation of dendrite development	15	0.000788403	-3.10325	CPEB3, PPP1R9A, APOE, NEURL1, TIAM1, BAIAP2, PACSIN1, SHANK3, CDKL5, CAMK1, NLGN1, KALRN, CAMK2B, EZH2, CRTC1	1325	66	16130	2.76672	0.0207639	0.0198004
GOTERM_BP	GO:2000310~regulation of N-methyl-D-aspartate selective glutamate receptor activity	7	0.000791273	-3.10167	DLG4, CNIH2, RASGRF1, PTK2B, NLGN1, MAPK8IP2, OPRM1	1325	15	16130	5.68101	0.0207639	0.0198004
GOTERM_BP	GO:0051966~regulation of synaptic transmission, glutamatergic	13	0.000836581	-3.07749	UNC13A, MAPK8IP2, GRM2, GRM3, CNR1, SHANK3, PTK2B, NLGN1, KALRN, IQSEC2, GRM5, DRD1, SHANK2	1325	52	16130	3.0434	0.0218245	0.0208118
GOTERM_BP	GO:0009259~ribonucleotide metabolic process	66	0.000883896	-3.0536	MPP1, DLG4, RUNDC3A, GNAI3, AK2, GRM3, ADSS2, OLA1, STAT3, GART, NUDT3, ATP1B1, VIP, AKAP12, COX5A, APOE, COX7A2L, DLG3, OPRM1, DLG2, PDE4A, PGAM1, GPR65, NDUFA5, PKLR, ATP6V0A2, GNAL, RACK1, MPP2, ADCY1, CRHR1, PPIF, NDUFA10, IMPDH2, PRKAA2, CTNS, MYC, NDUFA8, NME5, AQP1, CALCRL, NDUFB8, PTK2B, HIF1A, COA6, DRD1, HSPA8, CBFA2T3, RAMP2, ENO3, GALK1, ADRB1, HKDC1, GABBR2, GSK3A, CASK, GUCY1B1, NUD…	1325	535	16130	1.50179	0.0229248	0.021861
GOTERM_BP	GO:0032271~regulation of protein polymerization	29	0.000901183	-3.04519	RPS3, PPP1R9A, MYADM, SPTAN1, ACTR3B, TWF1, TPPP, FHOD3, BAIAP2, CDC42EP4, FKBP4, CORO1B, NCKAP1, PTK2B, INPP5J, CLIP3, PICK1, PFN1, PRKCE, SPTBN1, FER, SPTBN2, NCK1, DCTN1, IQGAP2, SPTBN4, CORO1A, WASF1, MAPRE1	1325	182	16130	1.93975	0.023238	0.0221597
GOTERM_BP	GO:0006163~purine nucleotide metabolic process	67	0.000974718	-3.01112	MPP1, DLG4, RUNDC3A, GNAI3, AK2, GRM3, GDA, ADSS2, OLA1, STAT3, GART, NUDT3, ATP1B1, VIP, AKAP12, COX5A, APOE, COX7A2L, DLG3, OPRM1, DLG2, PDE4A, PGAM1, GPR65, NDUFA5, PKLR, ATP6V0A2, GNAL, RACK1, MPP2, ADCY1, CRHR1, PPIF, NDUFA10, IMPDH2, PRKAA2, CTNS, MYC, NDUFA8, NME5, AQP1, CALCRL, NDUFB8, PTK2B, HIF1A, COA6, DRD1, HSPA8, CBFA2T3, RAMP2, ENO3, GALK1, ADRB1, HKDC1, GABBR2, GSK3A, CASK, GUCY1B1…	1325	547	16130	1.4911	0.0249898	0.0238302
GOTERM_BP	GO:0000028~ribosomal small subunit assembly	8	0.00102759	-2.98818	RPSA, RPS28, RPS27L, RPS10, RPS5, RPS19, RPS14, RPS17	1325	21	16130	4.63756	0.0261946	0.0249792
GOTERM_BP	GO:0006140~regulation of nucleotide metabolic process	32	0.00116936	-2.93205	RUNDC3A, GNAI3, PRKAA2, GRM3, ME1, MYC, CALCRL, STAT3, PTK2B, HIF1A, VIP, DRD1, CBFA2T3, AKAP12, RAMP2, ADRB1, APOE, GABBR2, GSK3A, GRM2, SIRT6, OPRM1, PGAM1, GPR65, EDNRA, GNAL, RACK1, ADCYAP1R1, DDIT4, ADCY1, CRHR1, PPIF	1325	212	16130	1.83752	0.0296392	0.0282639
GOTERM_BP	GO:0007417~central nervous system development	101	0.00120192	-2.92012	FGF13, KRAS, ANP32B, KIRREL3, RTN4, AGTPBP1, GART, OLIG1, STK36, XRN2, CXCR4, NOTCH1, PLXNA3, PRMT5, CDK5RAP3, GABRA4, TSKU, BCL11B, GFAP, GNB4, SYNJ1, ZEB1, TAGLN3, SALL1, ACTL6A, SEMA5A, NEURL1, CDK6, CTNS, MRTFA, EFHC1, MYC, NME5, SHANK3, NCKAP1, HIF1A, DPYSL2, EZH2, NUMBL, ENO3, NAPA, APP, CDK5R1, PHF8, GNAO1, SLC8A1, DDIT4, KCNC1, MAP1S, RAPGEF2, GLI2, ZNF335, PTEN, STAT3, RBPJ, TIMP4, BMP2,…	1325	904	16130	1.3601	0.0302926	0.0288869
GOTERM_BP	GO:0002790~peptide secretion	36	0.0012853	-2.89099	UCP2, C2CD2L, MYO5A, ARRB1, CLOCK, HADH, TRPV4, CNR1, AACS, HIF1A, OXCT1, CDK16, PTPRN2, VIP, MPC2, EFNA5, CACNA1C, TIAM1, MIDN, PRKCE, SRI, CACNA1D, CACNA1E, RAB11FIP5, VSNL1, SYT7, PCLO, GPR68, STXBP4, PRKN, DOC2B, PTPRN, SOX4, RAB11FIP2, NR1D1, CRHR1	1325	250	16130	1.753	0.0321811	0.0306878
GOTERM_BP	GO:0006461~protein complex assembly	151	0.00129128	-2.88898	UBE2C, MYADM, FGF13, ANP32B, MAP7D3, ZFYVE9, MAPK8IP2, FANCC, RTN4, SRP19, TRPV4, BAIAP2, MIS12, KCNJ12, KCTD16, ATL3, EHD3, EFNA5, HBE1, NUPR1, GMNN, SPTBN1, MSRB1, PRKCZ, PDCL, SYNJ1, TOMM20, PPM1A, CORO1A, EIF4EBP1, NAPB, DMXL2, KCNB2, CHP1, KCTD5, HMGB2, SNAP47, RPS3, DGKH, KCNA2, KCTD3, NDUFA10, STX1B, TWF1, NIFK, MYC, CDC42EP4, FKBP4, MIEF2, UBE2K, NCKAP1, NDUFB8, THG1L, COA6, NLGN1, PSMC1,…	1325	1445	16130	1.27212	0.0321811	0.0306878
GOTERM_BP	GO:0045055~regulated exocytosis	40	0.00133261	-2.8753	CBARP, DNAJC5, UNC13A, SYT3, RAB3D, VAMP3, STX1B, STXBP1, RIMS3, FAM3C, UNC13D, RIMS1, NLGN1, NOTCH1, CACNA1I, NAPA, SCAMP5, RAB3A, APP, SYT16, ABR, BRAF, FER, RAB11FIP5, ADGRL1, DOC2A, FLNA, SYNJ1, SYT7, PCLO, CPLX2, PCDH7, CORO1A, NAPB, PIP5K1C, DOC2B, RAB11FIP2, CHP1, ABCC4, SNAP47	1325	288	16130	1.69078	0.0330265	0.031494
GOTERM_BP	GO:0007411~axon guidance	33	0.00135028	-2.86958	SEMA5A, UNC5D, SPTAN1, KRAS, ANK3, GLI2, SEMA6B, SEMA4F, DAG1, BMPR2, SEMA4B, DPYSL2, ENAH, PLXNA3, CHN1, EFNA5, MAPK1, BCL11B, PLXNA2, ETV4, MEGF8, APP, B3GNT2, SPTBN1, UNC5A, CDK5R1, PLXNA1, SPTBN2, BOC, RPL24, SPTBN4, FZD3, APBB2	1325	223	16130	1.80147	0.0332796	0.0317354
GOTERM_BP	GO:0043623~cellular protein complex assembly	69	0.00140433	-2.85253	PPP1R9A, UBE2C, MYADM, SPTAN1, FGF13, MAP7D3, ACTR3B, VAMP3, ZFYVE9, MAPK8IP2, RTN4, SRP19, TRPV4, PSMD8, BAIAP2, MIS12, SNAP91, CLIP3, NDUFAF4, EFNA5, SPTBN1, MSRB1, SPTBN2, SYNJ1, TOMM20, SPTBN4, CORO1A, NDUFA5, PPM1A, EIF4B, DMXL2, PRKN, ATP6V0A2, AXIN1, SNAP47, RPS3, NDUFA10, EXOC8, TWF1, TPPP, FHOD3, NDUFA8, RAP1GDS1, CDC42EP4, USH1C, FKBP4, UBE2K, NCKAP1, CORO1B, NDUFB8, PTK2B, COA6, INPP5J…	1325	575	16130	1.46083	0.0344216	0.0328243
GOTERM_BP	GO:0036465~synaptic vesicle recycling	9	0.00141342	-2.84973	PACSIN1, SYNJ1, SYT7, DNM1, PIP5K1C, NLGN1, SH3GL2, RAB3A, DENND1A	1325	28	16130	3.91294	0.0344551	0.0328563
GOTERM_BP	GO:0042886~amide transport	40	0.00142204	-2.84709	DISP1, UCP2, C2CD2L, MYO5A, ARRB1, CLOCK, HADH, TRPV4, CNR1, AACS, HIF1A, OXCT1, CDK16, PTPRN2, AQP7, VIP, MPC2, EFNA5, CACNA1C, TIAM1, MIDN, PRKCE, SRI, CACNA1D, CACNA1E, RAB11FIP5, VSNL1, SYT7, PCLO, CERT1, GPR68, STXBP4, AQP3, PRKN, DOC2B, PTPRN, SOX4, RAB11FIP2, NR1D1, CRHR1	1325	289	16130	1.68493	0.0344766	0.0328768
GOTERM_BP	GO:0050801~ion homeostasis	81	0.00143047	-2.84452	F2R, GPR12, STC2, DLG4, HYAL2, CACNA2D1, ATP6V0E1, ERO1A, MYO5A, TRPV4, ADRA1B, UBASH3B, C1QTNF1, CXCR4, HMOX2, BAX, ATP1B1, SCN2B, SCN10A, TRPC5, APOE, SLC8A2, TMCO1, SRI, CNNM4, OPRM1, KCNA1, JPH3, TPT1, NEDD4L, PIK3CB, SV2A, CORO1A, GPR65, ATP13A2, DMXL2, PRKN, KCTD17, ATP6V0A2, CHP1, RACK1, NTSR1, CACNB3, ATP6AP1, NUBP1, JPH1, C19orf12, SLC17A7, ANK3, SLC4A3, CCR9, ATP6V1E1, PDK2, MYC, RAP1GD…	1325	699	16130	1.41067	0.0344938	0.0328932
GOTERM_BP	GO:0030490~maturation of SSU-rRNA	12	0.00144836	-2.83912	RPSA, TSR2, RPS28, FCF1, SNU13, RPS8, EMG1, RPS24, RPS16, RRS1, RPS19, RPS14	1325	48	16130	3.0434	0.0346998	0.0330897
GOTERM_BP	GO:0097485~neuron projection guidance	33	0.00145458	-2.83726	SEMA5A, UNC5D, SPTAN1, KRAS, ANK3, GLI2, SEMA6B, SEMA4F, DAG1, BMPR2, SEMA4B, DPYSL2, ENAH, PLXNA3, CHN1, EFNA5, MAPK1, BCL11B, PLXNA2, ETV4, MEGF8, APP, B3GNT2, SPTBN1, UNC5A, CDK5R1, PLXNA1, SPTBN2, BOC, RPL24, SPTBN4, FZD3, APBB2	1325	224	16130	1.79343	0.0346998	0.0330897
GOTERM_BP	GO:0045937~positive regulation of phosphate metabolic process	114	0.00150364	-2.82285	F2R, FGF13, KRAS, PAK2, MAPK8IP2, MAP3K9, CKS1B, TRPV4, ADRA1B, CAMK1, CXCR4, CCNY, FBXW7, VIP, IL12A, EFNA5, AKAP12, APOE, TGFBR1, DUSP22, MAPKAPK3, MDFI, AMBRA1, OPRM1, PPARGC1B, LRRK1, PRKCZ, PIK3CB, RASSF2, ADCY1, CHEK2, CRHR1, RPTOR, RPS3, MAPK10, NEURL1, MYC, UBE2K, HIF1A, EZH2, PHB2, RAMP2, HIPK2, ADRB1, CDK5R1, CAMK2D, CKS2, CIB1, EDNRA, SRCIN1, PPP1R16B, HMGB1, ADCYAP1R1, ROCK2, PPP1R9A,…	1325	1049	16130	1.32296	0.0354908	0.0338439
GOTERM_BP	GO:0010562~positive regulation of phosphorus metabolic process	114	0.00150364	-2.82285	F2R, FGF13, KRAS, PAK2, MAPK8IP2, MAP3K9, CKS1B, TRPV4, ADRA1B, CAMK1, CXCR4, CCNY, FBXW7, VIP, IL12A, EFNA5, AKAP12, APOE, TGFBR1, DUSP22, MAPKAPK3, MDFI, AMBRA1, OPRM1, PPARGC1B, LRRK1, PRKCZ, PIK3CB, RASSF2, ADCY1, CHEK2, CRHR1, RPTOR, RPS3, MAPK10, NEURL1, MYC, UBE2K, HIF1A, EZH2, PHB2, RAMP2, HIPK2, ADRB1, CDK5R1, CAMK2D, CKS2, CIB1, EDNRA, SRCIN1, PPP1R16B, HMGB1, ADCYAP1R1, ROCK2, PPP1R9A,…	1325	1049	16130	1.32296	0.0354908	0.0338439
GOTERM_BP	GO:0046839~phospholipid dephosphorylation	10	0.00163888	-2.78545	PLPPR2, SYNJ1, PIP4P1, INPP5J, SACM1L, PLPP5, PTEN, PLPPR4, PLPP4, INPPL1	1325	35	16130	3.47817	0.0384791	0.0366936
GOTERM_BP	GO:0019693~ribose phosphate metabolic process	66	0.00170122	-2.76924	MPP1, DLG4, RUNDC3A, GNAI3, AK2, GRM3, ADSS2, OLA1, STAT3, GART, NUDT3, ATP1B1, VIP, AKAP12, COX5A, APOE, COX7A2L, DLG3, OPRM1, DLG2, PDE4A, PGAM1, GPR65, NDUFA5, PKLR, ATP6V0A2, GNAL, RACK1, MPP2, ADCY1, CRHR1, PPIF, NDUFA10, IMPDH2, PRKAA2, CTNS, MYC, NDUFA8, NME5, AQP1, CALCRL, NDUFB8, PTK2B, HIF1A, COA6, DRD1, HSPA8, CBFA2T3, RAMP2, ENO3, GALK1, ADRB1, HKDC1, GABBR2, GSK3A, CASK, GUCY1B1, NUD…	1325	549	16130	1.46349	0.0397337	0.03789
GOTERM_BP	GO:0097120~receptor localization to synapse	6	0.00179368	-2.74626	DLG4, CNIH2, NETO1, NLGN1, DLG3, DLG2	1325	12	16130	6.08679	0.0416749	0.0397411
GOTERM_BP	GO:0098815~modulation of excitatory postsynaptic potential	9	0.00181322	-2.74155	SHANK3, DLG4, RIMS1, PTK2B, NETO1, NLGN1, STX1B, PTEN, PRKCZ	1325	29	16130	3.77801	0.0419108	0.039966
GOTERM_BP	GO:0044819~mitotic G1/S transition checkpoint	15	0.00191717	-2.71734	GTSE1, TFDP1, PCNA, NPM1, CNOT6, DGKZ, RPS27L, E2F7, BAX, RBL2, RBM38, SOX4, CHEK2, TP53, PLK2	1325	72	16130	2.53616	0.0440849	0.0420393
GOTERM_BP	GO:0036211~protein modification process	358	0.00200267	-2.69839	F2R, DAD1, MYADM, FGF13, KRAS, ST6GALNAC6, ABTB1, SMAD5, PAK2, FBXL2, ERO1A, UBXN2A, CDK4, ADRA1B, UBE2N, TRIM32, CDK15, VKORC1L1, PHF19, NUP35, STK36, CXCR4, USP14, UHRF1, PRMT5, IL12A, APOE, TGFBR1, UHMK1, DUSP22, MAPKAPK3, MDFI, NUP37, B3GNT2, KLHL29, RIOX1, LRRC4B, OTUD7A, MMP15, CHP1, GALNT13, DNAJA1, CHEK2, AAAS, RPTOR, PPIF, RPS3, PSMA2, ACTL6A, CDK6, RASGRF2, AAK1, PAK6, TWF1, MYC, SHANK3…	1325	3818	16130	1.14147	0.0455811	0.0434661
GOTERM_BP	GO:0006464~cellular protein modification process	358	0.00200267	-2.69839	F2R, DAD1, MYADM, FGF13, KRAS, ST6GALNAC6, ABTB1, SMAD5, PAK2, FBXL2, ERO1A, UBXN2A, CDK4, ADRA1B, UBE2N, TRIM32, CDK15, VKORC1L1, PHF19, NUP35, STK36, CXCR4, USP14, UHRF1, PRMT5, IL12A, APOE, TGFBR1, UHMK1, DUSP22, MAPKAPK3, MDFI, NUP37, B3GNT2, KLHL29, RIOX1, LRRC4B, OTUD7A, MMP15, CHP1, GALNT13, DNAJA1, CHEK2, AAAS, RPTOR, PPIF, RPS3, PSMA2, ACTL6A, CDK6, RASGRF2, AAK1, PAK6, TWF1, MYC, SHANK3…	1325	3818	16130	1.14147	0.0455811	0.0434661
GOTERM_BP	GO:0007212~dopamine receptor signaling pathway	10	0.00202841	-2.69284	FLNA, GNAO1, GSK3A, GNAI3, ARPP19, GNAL, OPRM1, PRMT5, GPR52, DRD1	1325	36	16130	3.38155	0.0459326	0.0438013
GOTERM_BP	GO:0097688~glutamate receptor clustering	4	0.00207196	-2.68362	APOE, SHANK3, DLG4, NLGN1	1325	4	16130	12.1736	0.0463566	0.0442056
GOTERM_BP	GO:0097113~AMPA glutamate receptor clustering	4	0.00207196	-2.68362	APOE, SHANK3, DLG4, NLGN1	1325	4	16130	12.1736	0.0463566	0.0442056
GOTERM_BP	GO:0046879~hormone secretion	40	0.00207831	-2.68229	VAMP3, UCP2, C2CD2L, MYO5A, ARRB1, CLOCK, HADH, TRPV4, CNR1, AACS, C1QTNF1, HIF1A, OXCT1, CDK16, PTPRN2, VIP, MPC2, EFNA5, CACNA1C, TIAM1, MIDN, PRKCE, CRY1, SRI, CACNA1D, CACNA1E, SOX11, RAB11FIP5, VSNL1, SYT7, PCLO, GPR68, STXBP4, PRKN, DOC2B, PTPRN, SOX4, RAB11FIP2, NR1D1, CRHR1	1325	295	16130	1.65066	0.0463566	0.0442056
GOTERM_CC	GO:0022626~cytosolic ribosome	62	2.78181e-32	-31.5557	RPS8, RPS13, RPLP2, RPS7, RPL13A, RPS9, RPS16, RPL34, RPL13, RPL23, RPS24, RPL35, FAU, RPSA, RPS28, RPL12, RPS6, SNU13, RPS18, RPL19, RPL29, RPS14, RPL21, RPS11, RPL35A, RPS3, RPL23A, RPL27, RPL37, RPS12, RPL17, RPL37A, RPL39, RPL22L1, RPS10, RPL6, RPL30, RPS2, RPS23, RPL18, RPS19, RPL14, RPLP1, RPS4X, RPS25, RPS5, RPL4, RPL10A, RPS3A, RPL7, RPL22, RPL24, RPL3, RPS27L, RPL5, RPLP0, RPS17, RPL10, …	1331	125	15514	5.78133	2.09192e-29	1.90832e-29
GOTERM_CC	GO:0044391~ribosomal subunit	65	5.96803e-23	-22.2242	RPS8, RPS13, RPLP2, RPS7, RPL13A, MRPL24, RPS9, RPS16, RPL34, RPL13, RPL23, RPS24, RPL35, MRPL11, FAU, RPSA, RPS28, RPL12, RPS6, SNU13, RPS18, RPL19, RPL29, RACK1, RPS14, RPL21, RPS11, RPL35A, RPS3, RPL23A, RPL27, RPL37, RPS12, RPL17, RPL37A, RPL39, RPL22L1, RPS10, RPL6, RPL30, RPS2, RPS23, RPL18, RPS19, RPL14, RPLP1, RPS4X, RPS25, RPS5, RPL4, RPL10A, RPS3A, RPL7, RPL22, RPL24, RPL3, RPS27L, RPL5…	1331	189	15514	4.00864	2.24398e-20	2.04704e-20
GOTERM_CC	GO:0005829~cytosol	430	1.72115e-20	-19.7642	PI4KA, SMAD5, NCBP2, PAK2, UBXN2A, ARHGEF9, CDK4, DNAJC1, POLR3D, NOTCH1, PRMT5, EIF3H, KPNA6, MAPKAPK3, TARS1, NUP37, BCL2L10, GMNN, AMBRA1, GFAP, ADPRM, PGAM1, RPSA, CORO1A, RPL19, RPL21, DNAJA1, CDK6, RASGRF2, RPL37, PLEKHG5, STX1B, DTYMK, MYC, NISCH, RPL39, RPL30, DPYSL2, RPL18, NCF4, BTBD6, APP, RTKN, GSDME, CNOT6, CAMK2D, DOP1B, RPL10, EIF3D, ROCK2, PPP1R9A, EEF1B2, CTNNA1, ZFYVE28, STXBP1,…	1331	3399	15514	1.47456	4.31435e-18	3.9357e-18
GOTERM_CC	GO:0044445~cytosolic part	70	3.03916e-20	-19.5172	RPS8, RPS13, RPLP2, RPS7, RPL13A, RPS9, RPS16, RPL34, RPL13, RPL23, HBE1, RPS24, RPL35, FAU, RPSA, RPS28, RPL12, RPS6, SNU13, RPS18, RPL19, RPL29, RPS14, RPL21, RPS11, SNAP47, RPL35A, RPS3, IKBKB, RPL23A, RPL27, RPL37, RPS12, RPL17, RPL37A, RPL39, RPL22L1, RPS10, RPL6, RPL30, RPS2, RPS23, RPL18, PSMC1, RPS19, RPL14, RPLP1, ENO3, RPS4X, RPS25, GUCY1B1, HPS5, RPS5, RPL4, RPL10A, RPS3A, RPL7, RPL22,…	1331	239	15514	3.41386	5.71362e-18	5.21216e-18
GOTERM_CC	GO:0005840~ribosome	72	4.9627e-20	-19.3043	RPS8, RPS13, RPLP2, RPS7, RPL13A, MRPL24, RPS9, RPS16, RPL34, RPL13, PRMT3, RPL23, TMA16, RPS24, RPL35, MRPL11, FAU, RPSA, RPS28, RPL12, RPS6, SNU13, RPS18, RPL19, RPL29, RACK1, RPS14, RPL21, RPS11, RPL35A, RPS3, RPL23A, RPL27, MRPL40, RPL37, RPS12, RPL17, RPL37A, RPS6KL1, RPL39, RPL22L1, RPS10, RPL6, RPL30, RPS2, RPS23, RPL18, RPS19, RPL14, RPLP1, RPS4X, RPS6KA2, RPS25, RPS5, RPL4, RPL10A, NCK1,…	1331	253	15514	3.31709	7.4639e-18	6.80882e-18
GOTERM_CC	GO:0022625~cytosolic large ribosomal subunit	35	5.2354e-19	-18.281	RPL35A, RPL23A, RPL27, RPL37, RPL17, RPL37A, RPLP2, RPL13A, RPL22L1, RPL39, RPL6, RPL30, RPL18, RPL34, RPL13, RPL14, RPL23, RPLP1, RPL4, RPL10A, RPL35, RPL12, RPL7, RPL22, RPL24, RPL3, SNU13, RPL5, RPL19, RPLP0, RPL29, RPL10, RPL21, RPL11, RPL18A	1331	68	15514	5.99936	6.56171e-17	5.98581e-17
GOTERM_CC	GO:0005737~cytoplasm	1053	1.57125e-16	-15.8038	F2R, SYT3, PI4KA, LMAN2L, ST6GALNAC6, SMAD5, COMMD2, NCBP2, ERO1A, UBXN2A, ARHGEF9, TFEB, CDK4, DNAJC1, TXN2, SHOC2, TNFSF13B, IQSEC2, LPP, EIF3H, KPNA6, TARS1, MAPKAPK3, MDFI, BCL2L10, GMNN, GFAP, ADPRM, MMP14, PGAM1, ARL4D, ZEB1, TOMM20, PNKD, SEPTIN2, EMG1, HMBOX1, RPL19, CHEK2, DGKH, CPEB1, CDK6, PAK6, DTYMK, MYC, NISCH, ANXA11, SHANK3, RRS1, NCF4, BTBD6, CNST, HIPK2, BHLHE40, GOLGA7B, APP, N…	1331	10775	15514	1.13909	1.68797e-14	1.53982e-14
GOTERM_CC	GO:0030425~dendrite	97	2.70189e-16	-15.5683	FGF13, KIRREL3, ERO1A, DENND1A, GRIP1, BAIAP2, TXN2, NCS1, AMIGO1, APOE, UHMK1, SLC8A2, CHRM2, OPRM1, CPLX2, KCNB2, BRINP1, HCN1, SNAP47, RPTOR, KCNA2, NEURL1, CPEB1, CNN3, RIN1, SIPA1L1, SHANK3, NLGN1, DPYSL2, BNIP3, PLK2, CHRM3, HTT, APP, GRM2, CDK5R1, GNAO1, CIB1, PDYN, SRCIN1, SLC8A1, RPLP0, KCNC1, FRMPD4, SHANK2, PPP1R9A, MAP1S, DLG4, RAP1GAP, HTR7, TTLL7, GRM3, UBXN1, PTEN, APBB1, ARFGEF2, …	1331	466	15514	2.42623	2.53977e-14	2.31687e-14
GOTERM_CC	GO:0044444~cytoplasmic part	835	3.41748e-16	-15.4663	F2R, SYT3, PI4KA, LMAN2L, ST6GALNAC6, SMAD5, NCBP2, ERO1A, UBXN2A, ARHGEF9, CDK4, DNAJC1, TXN2, SHOC2, TNFSF13B, EIF3H, KPNA6, TARS1, MAPKAPK3, BCL2L10, GMNN, GFAP, ADPRM, MMP14, PGAM1, TOMM20, PNKD, SEPTIN2, RPL19, CHEK2, DGKH, CPEB1, CDK6, DTYMK, MYC, NISCH, ANXA11, RRS1, NCF4, BTBD6, CNST, BHLHE40, GOLGA7B, APP, RTKN, DENND6A, DOP1B, RIN3, PPP1R16B, PTPRN, LRPAP1, ADCYAP1R1, RPL10, EIF3D, CYP2…	1331	8090	15514	1.20305	2.85549e-14	2.60488e-14
GOTERM_CC	GO:0022627~cytosolic small ribosomal subunit	27	5.75731e-16	-15.2398	RPS3, RPS8, RPS13, RPS12, RPS7, RPS9, RPS10, RPS16, RPS23, RPS2, RPS19, RPS4X, RPS25, RPS24, RPS5, RPSA, FAU, RPS28, RPS3A, RPS27L, RPS6, RPS18, RPS14, RPS17, EIF2D, RPS11, EIF2A	1331	48	15514	6.55644	4.32949e-14	3.94951e-14
GOTERM_CC	GO:0005925~focal adhesion	85	1.47852e-15	-14.8302	PI4KA, KRAS, RPS8, RPS13, CTNNA1, RPLP2, RPS7, DAG1, TRPV4, RPL13A, PPIB, RPS9, RPS16, LPP, EHD3, RPL23, AKAP12, LIMA1, OPRM1, CD99, SORBS2, MMP14, YWHAG, RPL12, RPS18, PIP5K1C, ATP6V0A2, RPL19, SYNE2, CHP1, P4HB, RPS14, RPS11, GNA12, RPS3, RPL27, CNN3, NPM1, TNC, CNN2, TWF1, RPL37A, CSPG4, ANXA5, NCKAP1, SORBS3, CORO1B, IRF2, LMO7, RPS10, TLN2, RPL6, PTK2B, RPL30, RPS2, ENAH, RPL18, RPS19, HSPA8…	1331	391	15514	2.53389	1.01077e-13	9.22056e-14
GOTERM_CC	GO:0043232~intracellular non-membrane-bounded organelle	462	1.07506e-13	-12.9686	RFC4, CNKSR2, ABTB1, GNAI3, TMX1, CDK4, POLR3D, TXN2, TARS1, NUP37, AMBRA1, GFAP, NUDCD2, RIOX1, ARL4D, RPSA, CORO1A, SEPTIN2, EMG1, HMBOX1, RPL19, RPL21, CHEK2, AAAS, ACTL6A, MRPL40, CPEB1, CDK6, RPL37, STX1B, SMARCA2, EFHC1, AKAP11, MYC, TBC1D30, RPL39, ANXA11, SHANK3, RPL30, RRS1, DPYSL2, DNAL4, RPL18, BTBD6, GINS4, BHLHE40, APP, NOVA1, NMD3, SIRT6, CHD3, LPXN, LYAR, RPL10, ROCK2, PPP1R9A, PPP…	1331	4026	15514	1.33756	6.73707e-12	6.14578e-12
GOTERM_CC	GO:0097060~synaptic membrane	64	3.31777e-13	-12.4792	F2R, UNC13A, LIN7B, DLG4, CNKSR2, GRM3, PTEN, DAG1, GRIP1, DENND1A, APBB1, GABRD, LZTS3, NCS1, GRIN2A, KCTD16, GABRA4, SYNE1, GABRG2, PPP1R9B, CABP1, DLG3, CHRM2, KCNA1, DLG2, ADGRL1, IQSEC3, SYNJ1, CAMK2A, LRRC4B, LRFN1, KCNA2, NEURL1, CPEB1, CNIH2, ANK3, SIPA1L1, ARRB1, SEMA4F, GRIN2B, LRRC7, SHANK3, RIMS1, NLGN1, RUSC1, CPEB3, CHRM3, GABRA1, PICK1, SSPN, GABBR2, CASK, TMEM240, GRM2, CLSTN1, SY…	1331	276	15514	2.70282	1.70094e-11	1.55166e-11
GOTERM_CC	GO:0014069~postsynaptic density	50	3.39284e-13	-12.4694	PPP1R9A, LIN7B, DLG4, CNKSR2, MAPK8IP2, GRM3, RTN4, BAIAP2, LZTS3, NCS1, GRIN2A, KCNAB2, PPP1R9B, CABP1, SPTBN1, DLG3, DLG2, PCLO, DAB1, CAMK2A, KALRN, AXIN1, LRFN1, NEURL1, CPEB1, CNIH2, CNN3, SIPA1L1, ARRB1, BMPR2, LRRC7, SHANK3, PTK2B, NLGN1, GRM5, BNIP3, NSF, RUSC1, CPEB3, PICK1, CACNA1C, CDK5R1, CLSTN1, NETO1, SRCIN1, MINK1, ATP1A1, PTCH1, HOMER3, SHANK2	1331	184	15514	3.16736	1.70094e-11	1.55166e-11
GOTERM_CC	GO:0099572~postsynaptic specialization	50	3.39284e-13	-12.4694	PPP1R9A, LIN7B, DLG4, CNKSR2, MAPK8IP2, GRM3, RTN4, BAIAP2, LZTS3, NCS1, GRIN2A, KCNAB2, PPP1R9B, CABP1, SPTBN1, DLG3, DLG2, PCLO, DAB1, CAMK2A, KALRN, AXIN1, LRFN1, NEURL1, CPEB1, CNIH2, CNN3, SIPA1L1, ARRB1, BMPR2, LRRC7, SHANK3, PTK2B, NLGN1, GRM5, BNIP3, NSF, RUSC1, CPEB3, PICK1, CACNA1C, CDK5R1, CLSTN1, NETO1, SRCIN1, MINK1, ATP1A1, PTCH1, HOMER3, SHANK2	1331	184	15514	3.16736	1.70094e-11	1.55166e-11
GOTERM_CC	GO:0030424~axon	81	4.69641e-12	-11.3282	DNAJC5, UNC13A, DLG4, RAP1GAP, FGF13, KIRREL3, STMN4, STMN3, GRM3, STXBP1, DAG1, CNR1, APBB1, NCS1, PTPRN2, KLC1, AMIGO1, UHMK1, TIAM1, KCNAB2, GABRG2, SPTBN1, SRI, CHRM2, SCN8A, KCNA1, DLG2, CNTNAP2, ADGRL1, PRKCZ, SYNJ1, CPLX2, SV2A, SPTBN4, CORO1A, FZD3, LRRC4B, MAPK8IP1, NTSR1, HCN1, KCNA2, SLC17A7, BIN1, ANK3, CCSAP, AAK1, SNCG, KCNAB1, MAP2K4, FKBP4, PTK2B, HIF1A, DPYSL2, SYNGR1, CHRM3, MAP…	1331	418	15514	2.25868	2.20731e-10	2.01358e-10
GOTERM_CC	GO:0015934~large ribosomal subunit	37	6.39431e-12	-11.1942	RPL35A, RPL23A, RPL27, RPL37, RPL17, RPL37A, RPLP2, RPL13A, MRPL24, RPL22L1, RPL39, RPL6, RPL30, RPL18, RPL34, RPL13, RPL14, RPL23, RPLP1, RPL4, RPL10A, RPL35, MRPL11, RPL12, RPL7, RPL22, RPL24, RPL3, SNU13, RPL5, RPL19, RPLP0, RPL29, RPL10, RPL21, RPL11, RPL18A	1331	118	15514	3.65482	2.82854e-10	2.58029e-10
GOTERM_CC	GO:0015935~small ribosomal subunit	28	1.28781e-11	-10.8901	RPS3, RPS8, RPS13, RPS12, RPS7, RPS9, RPS10, RPS16, RPS23, RPS2, RPS19, RPS4X, RPS25, RPS24, RPS5, RPSA, FAU, RPS28, RPS3A, RPS27L, RPS6, RPS18, RPS14, RPS17, RACK1, EIF2D, RPS11, EIF2A	1331	72	15514	4.53285	5.38018e-10	4.90798e-10
GOTERM_CC	GO:0030529~intracellular ribonucleoprotein complex	124	2.23767e-11	-10.6502	RPS8, RPS13, NOCT, SRP19, RBMX2, RPL13A, CMSS1, RPS16, EIF3H, UHMK1, SF3A2, RPS24, RPL35, BCAS2, EIF4E, MRPL11, ILF2, RPSA, EMG1, HMBOX1, RPL19, RPS14, RPL21, RPS11, RPS3, PSMA2, RPL23A, RPL27, MRPL40, CPEB1, EIF3G, RPL37, CPEB2, RPL17, CLOCK, RPL39, SNRPG, RPL30, RPS2, RRS1, RPL18, RPS19, BTBD6, HSPA8, RPL14, LARP1B, RPS6KA2, PRPF38A, RPS5, RPL4, RPL10A, NCK1, RPL22, RPL5, FTSJ3, RPLP0, RPL10, E…	1331	786	15514	1.83884	8.85646e-10	8.07917e-10
GOTERM_CC	GO:0045211~postsynaptic membrane	50	8.98611e-11	-10.0464	F2R, LIN7B, DLG4, CNKSR2, GRM3, PTEN, DAG1, GRIP1, APBB1, GABRD, LZTS3, NCS1, GRIN2A, KCTD16, GABRA4, SYNE1, GABRG2, CABP1, DLG3, CHRM2, DLG2, IQSEC3, LRFN1, NEURL1, CPEB1, CNIH2, ANK3, SIPA1L1, ARRB1, SEMA4F, GRIN2B, LRRC7, SHANK3, NLGN1, RUSC1, CPEB3, CHRM3, GABRA1, PICK1, SSPN, GABBR2, CLSTN1, NETO1, GABRA5, SRCIN1, KCTD8, MINK1, GABRB2, HOMER3, SHANK2	1331	212	15514	2.74903	3.33012e-09	3.03785e-09
GOTERM_CC	GO:0043025~neuronal cell body	78	9.29955e-11	-10.0315	PPP1R9A, MAP1S, RAPGEF2, CNKSR2, ACSL4, RAP1GAP, TTLL7, MAPK8IP2, MYO5A, UBXN1, BAIAP2, DENND1A, APBB1, ENC1, TXN2, CACNA1F, KLC1, AMIGO1, TRPC5, APOE, TIAM1, SLC8A2, PPP1R9B, UNC5A, DLG3, CHRM2, OPRM1, KCNA1, SPTBN2, CNTNAP2, PRKCZ, RPSA, CPLX2, DAB1, SPTBN4, FZD3, EIF4B, ATP13A2, KCNB2, RACK1, NTSR1, BRINP1, SNAP47, RPTOR, CRTC1, KCNA2, NEURL1, CNN3, RIN1, EFHC1, RBM8A, SNCG, KCNAB1, MAP2K4, PR…	1331	419	15514	2.16983	3.33012e-09	3.03785e-09
GOTERM_CC	GO:0033267~axon part	50	2.53918e-10	-9.59531	DNAJC5, UNC13A, DLG4, STXBP1, DAG1, APBB1, PTPRN2, TIAM1, KCNAB2, SPTBN1, SRI, CHRM2, SCN8A, KCNA1, DLG2, CNTNAP2, PRKCZ, SYNJ1, CPLX2, SV2A, SPTBN4, MAPK8IP1, NTSR1, KCNA2, BIN1, ANK3, AAK1, KCNAB1, FKBP4, HIF1A, DPYSL2, SYNGR1, CHRM3, NAPA, DNM1, RAB3A, APP, KCNQ2, PACSIN1, CAMK2D, SYT7, BOC, PDYN, TBC1D24, KCNQ3, PTPRN, ELK1, PARD3, PTCH1, AP3M1	1331	218	15514	2.67337	8.67938e-09	7.91762e-09
GOTERM_CC	GO:0005730~nucleolus	129	1.28814e-09	-8.89004	FGF13, ANP32B, RPS13, ABTB1, TMX1, CDK4, SRP19, UBE2N, RPL13A, OLA1, CDKN2AIPNL, XRN2, TXN2, FBXW7, P3H4, CDK5RAP3, NFATC3, SPTBN1, RPL35, BCAS2, RIOX1, ILF2, ARL4D, DDX24, WEE1, PIK3CB, SEPTIN2, EMG1, RPL19, HOMEZ, RPS14, RPL21, RPS11, HMGB2, RPS3, RPL23A, MRPL40, JAZF1, NIFK, MYC, EXOSC8, PGRMC1, RPS2, ESF1, RRS1, RPL18, RBL2, RPS19, NOP53, HSPA8, ADARB1, BHLHE40, DDX52, MIDN, NOP2, NOVA1, NMD3…	1331	882	15514	1.70477	4.21166e-08	3.84202e-08
GOTERM_CC	GO:0098590~plasma membrane region	134	2.39811e-09	-8.62013	F2R, HYAL2, CNKSR2, TRPV4, DENND1A, GRIP1, GABRD, LZTS3, NCS1, NOTCH1, KCTD16, TMEM17, EHD3, EFNA5, GABRA4, SYNE1, SLC8A2, SPTBN1, UNC5A, AKR1A1, CHRM2, OPRM1, CNNM4, DLG2, ADGRL1, PRKCZ, IQSEC3, SYNJ1, AQP3, SEPTIN2, PIP5K1C, LRRC4B, SYNE2, ABCC4, RPS3, KCNA2, NEURL1, PLEKHA1, CPEB1, AJAP1, SIPA1L1, TWF1, ATP6V1E1, ITGA9, SHANK3, NCKAP1, NLGN1, TESC, CHRM3, GABBR2, GRM2, CLSTN1, CIB1, SRCIN1, SL…	1331	936	15514	1.66869	7.51406e-08	6.85459e-08
GOTERM_CC	GO:0044304~main axon	21	5.94675e-08	-7.22572	KCNA2, DLG4, KCNAB2, TIAM1, DNM1, ANK3, BIN1, SPTBN1, APP, KCNQ2, KCNAB1, SCN8A, DLG2, KCNA1, DAG1, CNTNAP2, CAMK2D, APBB1, SPTBN4, KCNQ3, PARD3	1331	60	15514	4.07956	1.78878e-06	1.63179e-06
GOTERM_CC	GO:0030426~growth cone	33	3.00665e-07	-6.52192	CBARP, PPP1R9A, FGF13, EXOC8, STMN4, NGEF, STMN3, MYO5A, TRPV4, CNR1, FKBP4, APBB1, PTK2B, INPP5J, DPYSL2, KLC1, TRPC5, TIAM1, THY1, PPP1R9B, APP, DLG3, CDK5R1, ADGRL1, BOC, CDKL5, CIB1, RASGRF1, PARD3, MAPK8IP1, APBB2, PTCH1, SHANK2	1331	142	15514	2.70876	8.69615e-06	7.93292e-06
GOTERM_CC	GO:0034702~ion channel complex	51	8.93954e-07	-6.04868	DLG4, CACNA2D1, GABRD, CACNA1I, CACNB1, GRIN2A, SCN2B, SCN10A, CACNA1F, GABRA4, AMIGO1, TRPC5, KCNAB2, GABRG2, CACNA1D, CACNA1E, KCNJ6, DLG3, SCN8A, KCNA1, DLG2, CNTNAP2, NOS1AP, STXBP5, KCNB2, CACNB2, CACNB3, KCNA2, CNIH2, KCNAB1, KCNG3, GRIN2B, OLFM3, PTK2B, NLGN1, KCNIP4, GABRA1, KCNN1, CACNA1C, SACM1L, KCNQ2, CACNA2D3, CAMK2D, GABRA5, KCNQ5, KCNQ3, KCNA4, GABRB2, KCNC1, KCNT1, SHANK2	1331	286	15514	2.0785	2.48983e-05	2.27131e-05
GOTERM_CC	GO:0043197~dendritic spine	27	1.00588e-06	-5.99745	PPP1R9A, NEURL1, DLG4, CNIH2, CNN3, SIPA1L1, GRM3, ARRB1, PTEN, PRKAR2B, BAIAP2, APBB1, SHANK3, NLGN1, ARFGEF2, TIAM1, SLC8A2, PPP1R9B, APP, SRI, CDK5R1, ARHGAP44, SLC8A1, NTSR1, NR1D1, SHANK2, FRMPD4	1331	108	15514	2.91397	2.70151e-05	2.46441e-05
GOTERM_CC	GO:0044309~neuron spine	27	1.4628e-06	-5.83481	PPP1R9A, NEURL1, DLG4, CNIH2, CNN3, SIPA1L1, GRM3, ARRB1, PTEN, PRKAR2B, BAIAP2, APBB1, SHANK3, NLGN1, ARFGEF2, TIAM1, SLC8A2, PPP1R9B, APP, SRI, CDK5R1, ARHGAP44, SLC8A1, NTSR1, NR1D1, SHANK2, FRMPD4	1331	110	15514	2.86099	3.7932e-05	3.46029e-05
GOTERM_CC	GO:1902495~transmembrane transporter complex	54	3.42467e-06	-5.46538	DLG4, CACNA2D1, GABRD, CACNA1I, CACNB1, GRIN2A, ATP1B1, SCN2B, SCN10A, CACNA1F, GABRA4, AMIGO1, TRPC5, KCNAB2, GABRG2, CACNA1D, CACNA1E, KCNJ6, DLG3, SCN8A, KCNA1, DLG2, CNTNAP2, NOS1AP, STXBP5, KCNB2, CACNB2, CACNB3, KCNA2, CNIH2, KCNAB1, KCNG3, GRIN2B, OLFM3, PTK2B, NLGN1, KCNIP4, ATP1B4, GABRA1, KCNN1, CACNA1C, SACM1L, KCNQ2, CACNA2D3, CAMK2D, GABRA5, KCNQ5, KCNQ3, KCNA4, ATP1A1, GABRB2, KCNC1…	1331	324	15514	1.94265	8.58452e-05	7.83109e-05
GOTERM_CC	GO:0034703~cation channel complex	35	3.64863e-06	-5.43787	KCNA2, DLG4, CACNA2D1, KCNAB1, KCNG3, KCNIP4, CACNA1I, CACNB1, SCN10A, SCN2B, CACNA1F, AMIGO1, KCNN1, CACNA1C, TRPC5, KCNAB2, KCNQ2, CACNA1D, CACNA1E, KCNJ6, SCN8A, DLG2, KCNA1, CACNA2D3, CNTNAP2, CAMK2D, NOS1AP, KCNQ5, KCNQ3, KCNA4, KCNB2, CACNB2, CACNB3, KCNC1, KCNT1	1331	173	15514	2.35813	8.85086e-05	8.07406e-05
GOTERM_CC	GO:0043679~axon terminus	26	8.18752e-06	-5.08685	DNAJC5, UNC13A, KCNA2, AAK1, STXBP1, DPYSL2, SYNGR1, PTPRN2, CHRM3, NAPA, KCNAB2, RAB3A, APP, SRI, CHRM2, KCNA1, PACSIN1, SYNJ1, SYT7, CPLX2, SV2A, PDYN, TBC1D24, PTPRN, ELK1, NTSR1	1331	113	15514	2.68189	0.000192407	0.00017552
GOTERM_CC	GO:0044446~intracellular organelle part	780	1.35967e-05	-4.86657	RFC4, SYT3, PI4KA, LMAN2L, ST6GALNAC6, SMAD5, NCBP2, ERO1A, CDK4, RBMX2, ADRA1B, DNAJC1, TXN2, SHOC2, MCM8, KPNA6, MAPKAPK3, BCL2L10, GMNN, GFAP, RIOX1, MMP14, ARL4D, ZEB1, TOMM20, SEPTIN2, EMG1, HMBOX1, RPL19, CHEK2, ACTL6A, DGKH, CPEB1, CDK6, DTYMK, MYC, TBC1D30, ANXA11, RRS1, NCF4, CNST, HIPK2, BHLHE40, GOLGA7B, APP, NMD3, SIRT6, CHD3, DOP1B, LYAR, PTPRN, ATXN1, LRPAP1, RPL10, CYP2U1, ROCK2, M…	1331	8233	15514	1.10429	0.00030984	0.000282647
GOTERM_CC	GO:0044306~neuron projection terminus	27	1.75399e-05	-4.75597	DNAJC5, UNC13A, KCNA2, DLG4, AAK1, STXBP1, DPYSL2, SYNGR1, PTPRN2, CHRM3, NAPA, KCNAB2, RAB3A, APP, SRI, CHRM2, KCNA1, PACSIN1, SYNJ1, SYT7, CPLX2, SV2A, PDYN, TBC1D24, PTPRN, ELK1, NTSR1	1331	125	15514	2.51767	0.000387941	0.000353893
GOTERM_CC	GO:0070382~exocytic vesicle	29	2.09959e-05	-4.67787	CBARP, DNAJC5, TPRG1L, SYT3, DLG4, SLC17A7, SLC17A6, STX1B, UNC13D, SCAMP1, SVOP, CDK16, GRIN2A, SYNGR1, PTPRN2, KCNK9, SV2B, SCAMP5, DNM1, RAB3A, SLC6A17, DOC2A, SYT7, RAB3B, SV2A, APBA1, DMXL2, PTPRN, STXBP5	1331	141	15514	2.39731	0.000451111	0.000411519
GOTERM_CC	GO:0008021~synaptic vesicle	27	2.35108e-05	-4.62873	CBARP, DNAJC5, TPRG1L, DLG4, SLC17A7, SLC17A6, STX1B, SCAMP1, SVOP, CDK16, GRIN2A, SYNGR1, PTPRN2, KCNK9, SV2B, SCAMP5, DNM1, RAB3A, SLC6A17, DOC2A, SYT7, RAB3B, SV2A, APBA1, DMXL2, PTPRN, STXBP5	1331	127	15514	2.47803	0.000491115	0.000448012
GOTERM_CC	GO:1990454~L-type voltage-gated calcium channel complex	6	2.56287e-05	-4.59127	CACNA1C, NOS1AP, CACNA2D1, CACNA1D, CACNB2, CACNB3	1331	6	15514	11.6559	0.000520885	0.000475169
GOTERM_CC	GO:0042734~presynaptic membrane	17	5.91797e-05	-4.22783	UNC13A, PICK1, KCNA2, CASK, GRM2, GRM3, KCNA1, DENND1A, ADGRL1, SYT7, APBB1, CAMK2A, RIMS1, LRRC4B, KCTD8, GRIN2A, KCTD16	1331	63	15514	3.14524	0.00117113	0.00106835
GOTERM_CC	GO:0044224~juxtaparanode region of axon	7	6.09278e-05	-4.21518	KCNA2, DLG4, KCNAB2, KCNAB1, KCNA1, DLG2, CNTNAP2	1331	10	15514	8.15913	0.00117481	0.0010717
GOTERM_CC	GO:0098797~plasma membrane protein complex	72	8.51906e-05	-4.06961	FKRP, DLG4, GNAI3, CACNA2D1, SGIP1, CTNNA1, DAG1, BMP2, CACNA1I, CACNB1, GRIN2A, ATP1B1, SCN2B, SCN10A, CACNA1F, AMIGO1, TGFBR1, RGS7, KCNAB2, GNG5, CACNA1D, CACNA1E, CLTCL1, KCNJ6, DLG3, SCN8A, KCNA1, DLG2, CNTNAP2, SYNJ1, NOS1AP, STXBP5, KCNB2, CACNB2, CACNB3, GNA12, IKBKB, KCNA2, ACVR1B, CNIH2, ITGB8, ARRB1, KCNAB1, KCNG3, GRIN2B, OLFM3, ITGA9, PTK2B, ACVR2A, NLGN1, DIABLO, KCNIP4, NCF4, ATP1B…	1331	527	15514	1.59246	0.00160158	0.00146102
GOTERM_CC	GO:0030133~transport vesicle	52	9.24728e-05	-4.03399	CBARP, DNAJC5, SYT3, DLG4, RAB3D, LMAN2L, SLC17A6, VAMP3, YIF1A, PCSK1, AFTPH, SVOP, TEX261, GRIN2A, PTPRN2, KCNK9, RAB27B, LMAN1, SPG21, CLTCL1, DOC2A, AIMP1, SV2A, APBA1, SEC13, ATP13A2, DMXL2, STXBP5, CHP1, TPRG1L, CNIH2, SLC17A7, STX1B, NPTX1, UNC13D, SCAMP1, CDK16, SYNGR1, CNST, SV2B, SSPN, SCAMP5, DNM1, RAB3A, APP, SLC6A17, RAB11FIP5, SYT7, RAB3B, KDELR2, PTPRN, SCAMP2	1331	346	15514	1.75175	0.00169609	0.00154723
GOTERM_CC	GO:0031981~nuclear lumen	365	0.000102297	-3.99014	RFC4, EXO1, POU2F1, FGF13, RPS13, MAP7D3, ABTB1, SMAD5, TMX1, NCBP2, PAK2, NOCT, CDK4, UBE2N, PHF19, MIS12, RPL13A, NUP35, POLR3D, TXN2, XRN2, SHOC2, NOTCH1, MCM8, UHRF1, PRMT5, P3H4, KPNA6, MAPKAPK3, NUP37, GMNN, RTCA, PPARGC1B, RIOX1, SCAI, ILF2, RPSA, ARL4D, ZEB1, SEPTIN2, EMG1, HMBOX1, RPL19, RPS14, RPL21, RPS11, HMGB2, CHEK2, AAAS, RPTOR, RPS3, PSMA2, ACTL6A, RPL23A, PLEKHA1, MRPL40, CPEB1, …	1331	3592	15514	1.18441	0.00183161	0.00167086
GOTERM_CC	GO:0044459~plasma membrane part	277	0.000108619	-3.9641	F2R, GPR12, CNKSR2, FGF13, KRAS, CADM3, GNAI3, CD276, CNR1, ADRA1B, DENND1A, GRIP1, KCNJ12, GPR83, NOTCH1, CACNA1I, KCTD16, EHD3, GABRA4, TGFBR1, GNG5, UNC5A, AKR1A1, CACNA1E, CD99, MMP14, SYNJ1, IQSEC3, CORO1A, SEPTIN2, PIP5K1C, LRRC4B, MMP15, KCNB2, MPP2, HCN1, CRHR1, RPS3, KCNA2, PLEKHA1, CPEB1, SNX18, KCNJ9, AAK1, TWF1, ANXA5, SHANK3, NCKAP1, NCF4, GRM5, PLPP5, CHRM3, ADRB1, PTPN3, CMKLR1, AP…	1331	2635	15514	1.22531	0.00189956	0.00173285
GOTERM_CC	GO:0043194~axon initial segment	7	0.000124296	-3.90554	CAMK2D, SPTBN4, ANK3, BIN1, KCNQ3, KCNQ2, SCN8A	1331	11	15514	7.41739	0.00212433	0.00193789
GOTERM_CC	GO:0008076~voltage-gated potassium channel complex	20	0.000186616	-3.72905	AMIGO1, KCNN1, KCNA2, DLG4, KCNAB2, KCNQ2, KCNJ6, KCNG3, KCNAB1, DLG2, KCNA1, CNTNAP2, NOS1AP, KCNQ5, KCNIP4, KCNQ3, KCNA4, KCNB2, KCNC1, KCNT1	1331	90	15514	2.5902	0.00311856	0.00284485
GOTERM_CC	GO:0043195~terminal bouton	16	0.000218071	-3.6614	DNAJC5, UNC13A, NAPA, AAK1, RAB3A, APP, STXBP1, SYNJ1, SYT7, CPLX2, SV2A, TBC1D24, DPYSL2, SYNGR1, PTPRN2, NTSR1	1331	63	15514	2.96023	0.00356499	0.0032521
GOTERM_CC	GO:0044428~nuclear part	397	0.000229237	-3.63971	RFC4, POU2F1, ABTB1, SMAD5, NCBP2, TMX1, NAV3, PAK2, CDK4, RBMX2, ADRA1B, DNAJC1, POLR3D, TXN2, SHOC2, NOTCH1, MCM8, MGST3, PRMT5, KPNA6, MAPKAPK3, NUP37, RTCA, BCL2L10, GMNN, SCAI, RIOX1, ARL4D, RPSA, ZEB1, SEPTIN2, EMG1, HMBOX1, RPL19, RPL21, CHEK2, AAAS, DGKH, ACTL6A, MRPL40, CPEB1, CDK6, STX1B, SMARCA2, MYC, ANXA11, RRS1, RPL18, GINS4, HIPK2, BHLHE40, APP, NOVA1, NMD3, SIRT6, CHD3, CAMK2D, LY…	1331	3981	15514	1.16237	0.00361921	0.00330157
GOTERM_CC	GO:0043198~dendritic shaft	11	0.000231014	-3.63636	FLNA, CNIH2, INPP5J, NLGN1, KIRREL3, SLC8A1, APP, DLG3, NTSR1, NSF, PRKAR2B	1331	32	15514	4.00671	0.00361921	0.00330157
GOTERM_CC	GO:0016023~cytoplasmic, membrane-bounded vesicle	136	0.000273527	-3.563	DNAJC5, SYT3, RNPEP, HYAL2, RAB3D, PI4KA, LMAN2L, SLC17A6, GNAI3, MYO5A, DENND1A, GRIP1, BAIAP2, NECAP2, RAB6B, SVOP, USP14, CXCR4, NCS1, NOTCH1, TEX261, CEP131, KLC1, EHD3, APOE, AP1S3, AMBRA1, MMP14, CORO1A, ATP13A2, DMXL2, STXBP5, CHP1, ABCC4, SCG5, SNX18, PLEKHG5, AAK1, CTNS, STX1B, ANXA11, SCAMP1, CAMKV, NCF4, FMNL1, HSPA8, CNST, PDIA4, DNM1, HTT, RAB3A, APP, CAMK2D, KDELR2, RIN3, PTPRN, GNA…	1331	1183	15514	1.33998	0.0041978	0.00382938
GOTERM_CC	GO:0030315~T-tubule	12	0.000776831	-3.10967	CAMK2D, CACNA1C, NOS1AP, ANK3, BIN1, SLC8A1, CACNA2D1, SRI, CACNA1D, ATP1A1, CACNB2, CACNB3	1331	43	15514	3.25281	0.0116835	0.0106581
GOTERM_MF	GO:0044822~poly(A) RNA binding	170	3.44494e-12	-11.4628	RPS8, RPS13, NCBP2, MYO5A, NOCT, RTN4, SRP19, RBMX2, UBE2N, RPL13A, XRN2, CMSS1, RPS16, CCDC9B, EIF3H, SYNE1, UHMK1, SF3A2, RPS24, RTCA, SPTBN1, RPL35, HSPE1, EIF4E, MRPL11, ILF2, RPSA, DDX24, CORO1A, EMG1, RPL19, RPS14, RPL21, RPS11, HMGB2, HSD17B10, RPS3, RPL23A, RPL27, MRPL40, CPEB1, EIF3G, CPEB2, RPL17, NIFK, CDC42EP4, FKBP4, ANXA11, SNRPG, COA6, METTL16, RPL30, RPS2, ESF1, RRS1, PSMC1, CISD2…	1023	1196	12075	1.67776	1.73969e-09	1.68802e-09
GOTERM_MF	GO:0019843~rRNA binding	23	2.61732e-09	-8.58214	RPL23, RPS3, RPLP1, RPL23A, RPS4X, RPL37, RPS13, ERI1, RPS5, RPLP2, MRPL11, RPL12, RPS9, RPL3, RPS18, EMG1, RPL5, RPL19, RPLP0, RPS14, DDX21, RPS11, RPL11	1023	62	12075	4.37872	6.60873e-07	6.41243e-07
GOTERM_MF	GO:0019901~protein kinase binding	79	8.42278e-07	-6.07454	PPP1R9A, HYAL2, TOM1L2, PRKAR1A, PAK2, MAPK8IP2, EEF1A1, PPME1, CKS1B, STXBP1, PTEN, TRPV4, SNAP91, STAT3, NCS1, CCNY, PKN1, CDK5RAP3, MAP3K1, TIAM1, CRY1, PRKCZ, PGAM1, YWHAG, RAB13, SV2A, RPS6, RPS18, NBEA, PRKN, RAB11FIP2, AXIN1, MAPK8IP1, RACK1, PPP1R15A, CHEK2, CACNB3, RPTOR, RPS3, IKBKB, NPM1, MEF2A, STX1B, ARRB1, PRKCSH, MAP2K4, PRKAR2B, CSPG4, PTK2B, HIF1A, DPYSL2, PPP1R12C, RPS19, DIRAS1…	1023	531	12075	1.75608	0.000141783	0.000137572
GOTERM_MF	GO:0031267~small GTPase binding	48	1.14871e-05	-4.93979	TBC1D22B, ATP6AP1, ROCK2, ULK1, TBC1D9, MTSS2, RAP1GAP, SRGAP3, EXOC8, RIN1, RUNDC1, MYO5A, BICDL1, CDC42EP4, DENND1A, TBC1D30, UNC13D, NCKAP1, RIMS1, RILP, RANGRF, PKN1, SGSM2, NSF, FMNL1, PFN1, TIAM1, CDC42BPB, MYO9B, RUSC2, MICAL1, RTKN, BRAF, RAB11FIP5, FLNA, IQGAP2, SGSM1, CDKL5, CIB1, WASF1, DMXL2, DENND5A, RIN3, STXBP5, RAB11FIP2, GDI1, ADCYAP1R1, AP3M1	1023	291	12075	1.94697	0.00145024	0.00140717
GOTERM_MF	GO:0022836~gated channel activity	52	2.41657e-05	-4.6168	DLG4, CACNA2D1, TMEM37, TRPV4, GABRD, KCNJ12, NCS1, TMEM63C, CACNA1I, CACNB1, GRIN2A, SCN2B, SCN10A, CACNA1F, KCNK9, GABRA4, KCNAB2, GABRG2, CACNA1D, CACNA1E, KCNJ6, DLG3, OPRM1, SCN8A, KCNA1, JPH3, KCNB2, CACNB2, HCN1, CACNB3, KCNA2, SLC17A7, KCNJ9, KCNAB1, KCNG3, AQP1, GRIN2B, PTK2B, KCNIP4, GABRA1, KCNN1, CACNA1C, ANO3, KCNQ2, CACNA2D3, GABRA5, KCNQ5, KCNQ3, KCNA4, GABRB2, KCNC1, KCNT1	1023	334	12075	1.83767	0.00244074	0.00236824
GOTERM_MF	GO:0032555~purine ribonucleotide binding	206	4.03797e-05	-4.39384	RFC4, PI4KA, KRAS, GNAI3, NAV3, PAK2, CDK4, UBE2N, CDK15, RAB36, NKIRAS2, STK36, MCM8, ATL3, EHD3, TGFBR1, UHMK1, MAPKAPK3, TARS1, RTCA, ILF2, ARL4D, SEPTIN2, PKLR, PIP5K1C, DNAJA1, HCN1, CHEK2, DGKH, CDK6, AAK1, PAK6, SMARCA2, TWF1, DTYMK, HSPA8, HIPK2, RPS6KA2, CHD3, RTKN, KIF21A, CAMK2D, GNAO1, GNA13, ATP1A1, ROCK2, MAP3K10, PRKAR1A, TTLL7, EIF5, ATP1B1, CAMK2B, AASDH, MAP3K1, MOV10, ABCD3, YA…	1023	1884	12075	1.29062	0.00312757	0.00303467
GOTERM_MF	GO:0017076~purine nucleotide binding	207	4.33524e-05	-4.36299	RFC4, PI4KA, KRAS, GNAI3, NAV3, PAK2, CDK4, UBE2N, CDK15, RAB36, NKIRAS2, STK36, MCM8, ATL3, EHD3, TGFBR1, UHMK1, MAPKAPK3, TARS1, RTCA, ILF2, ARL4D, SEPTIN2, PKLR, PIP5K1C, DNAJA1, HCN1, CHEK2, DGKH, CDK6, AAK1, PAK6, SMARCA2, TWF1, DTYMK, HSPA8, HIPK2, PFN1, RPS6KA2, CHD3, RTKN, KIF21A, CAMK2D, GNAO1, GNA13, ATP1A1, ROCK2, MAP3K10, PRKAR1A, TTLL7, EIF5, ATP1B1, CAMK2B, AASDH, MAP3K1, MOV10, ABC…	1023	1897	12075	1.288	0.00312757	0.00303467
GOTERM_MF	GO:0032553~ribonucleotide binding	206	6.97243e-05	-4.15662	RFC4, PI4KA, KRAS, GNAI3, NAV3, PAK2, CDK4, UBE2N, CDK15, RAB36, NKIRAS2, STK36, MCM8, ATL3, EHD3, TGFBR1, UHMK1, MAPKAPK3, TARS1, RTCA, ILF2, ARL4D, SEPTIN2, PKLR, PIP5K1C, DNAJA1, HCN1, CHEK2, DGKH, CDK6, AAK1, PAK6, SMARCA2, TWF1, DTYMK, HSPA8, HIPK2, RPS6KA2, CHD3, RTKN, KIF21A, CAMK2D, GNAO1, GNA13, ATP1A1, ROCK2, MAP3K10, PRKAR1A, TTLL7, EIF5, ATP1B1, CAMK2B, AASDH, MAP3K1, MOV10, ABCD3, YA…	1023	1900	12075	1.27975	0.00440135	0.00427062
GOTERM_MF	GO:0032550~purine ribonucleoside binding	200	0.000109453	-3.96077	RFC4, PI4KA, KRAS, GNAI3, NAV3, PAK2, CDK4, UBE2N, CDK15, RAB36, NKIRAS2, STK36, MCM8, ATL3, EHD3, TGFBR1, UHMK1, MAPKAPK3, TARS1, RTCA, ILF2, ARL4D, SEPTIN2, PKLR, PIP5K1C, DNAJA1, CHEK2, DGKH, CDK6, AAK1, PAK6, SMARCA2, TWF1, DTYMK, HSPA8, HIPK2, RPS6KA2, CHD3, RTKN, KIF21A, CAMK2D, GNAO1, GNA13, ATP1A1, ROCK2, MAP3K10, TTLL7, EIF5, ATP1B1, CAMK2B, AASDH, MAP3K1, MOV10, ABCD3, YARS1, SIK2, CDK1…	1023	1850	12075	1.27606	0.00614151	0.00595909
GOTERM_MF	GO:0022838~substrate-specific channel activity	61	0.000193743	-3.71277	DLG4, CACNA2D1, TMEM37, TRPV4, ASIC4, GABRD, KCNJ12, NCS1, TMEM63C, CACNA1I, CACNB1, GRIN2A, SCN2B, SCN10A, AQP7, CACNA1F, KCNK9, GABRA4, TRPC5, KCNAB2, GABRG2, TMCO1, CACNA1D, CACNA1E, KCNJ6, DLG3, OPRM1, SCN8A, KCNA1, JPH3, AQP3, DENND5A, KCNB2, CACNB2, HCN1, CACNB3, KCNA2, SLC17A7, KCNJ9, KCNAB1, KCNG3, MCOLN2, AQP1, GRIN2B, PTK2B, KCNIP4, GAR1, GABRA1, KCNN1, CACNA1C, ANO3, KCNQ2, CACNA2D3, G…	1023	445	12075	1.61801	0.00978404	0.00949343
GOTERM_MF	GO:0005216~ion channel activity	59	0.000229515	-3.63919	DLG4, CACNA2D1, TMEM37, TRPV4, ASIC4, GABRD, KCNJ12, NCS1, TMEM63C, CACNA1I, CACNB1, GRIN2A, SCN2B, SCN10A, CACNA1F, KCNK9, GABRA4, TRPC5, KCNAB2, GABRG2, TMCO1, CACNA1D, CACNA1E, KCNJ6, DLG3, OPRM1, SCN8A, KCNA1, JPH3, DENND5A, KCNB2, CACNB2, HCN1, CACNB3, KCNA2, SLC17A7, KCNJ9, KCNAB1, KCNG3, MCOLN2, AQP1, GRIN2B, PTK2B, KCNIP4, GAR1, GABRA1, KCNN1, CACNA1C, ANO3, KCNQ2, CACNA2D3, GABRA5, KCNQ5…	1023	429	12075	1.62333	0.0105368	0.0102238
GOTERM_MF	GO:0098641~cadherin binding involved in cell-cell adhesion	43	0.000403548	-3.3941	RPL23A, SH3GLB2, PI4KA, SPTAN1, CNN3, PAK2, PAK6, PPME1, EIF3E, CTNNA1, CNN2, TWF1, RTN4, NIBAN2, BAIAP2, MRTFB, OLA1, CORO1B, RPL6, SNX5, RPS2, EIF5, RPL34, HSPA8, EEF1G, RPL14, LIMA1, MPP7, PFN1, RUVBL1, ESYT2, SPTBN1, SH3GLB1, SPTBN2, FLNA, NCK1, RPL24, WASF2, SEPTIN2, MAPRE1, RPL29, RACK1, EIF2A	1023	290	12075	1.75018	0.0160007	0.0155254
GOTERM_MF	GO:0004672~protein kinase activity	81	0.000411898	-3.38521	STK10, ROCK2, ULK1, PDK3, MAP3K10, NEK7, PAK2, MAP3K9, CDK4, CDK15, MARK4, CAMK1, STK36, CAMK2B, PKN1, CAMK4, MAP3K1, TGFBR1, UHMK1, CAB39, GRK6, MAPKAPK3, PPP1R9B, SIK2, CDK14, OBSCN, PRKCZ, LRRK1, CERT1, CDKL5, WEE1, CAMK2A, KALRN, MAPKAPK2, TAOK3, CAMK1D, RASSF2, CHEK2, IKBKB, MAPK10, ACVR1B, CDK6, MAST1, PRKAA2, AAK1, PAK6, TWF1, PDK2, RPS6KL1, MAP2K4, BMPR2, PTK2B, ACVR2A, CAMKV, CDK16, CDK1…	1023	652	12075	1.46639	0.0160007	0.0155254
GOTERM_MF	GO:0032559~adenyl ribonucleotide binding	165	0.000577694	-3.2383	RFC4, UBE2C, ACSL4, PI4KA, KRAS, ABCG4, NEK7, NAV3, PAK2, MYO5A, MAP3K9, CDK4, TRPV4, UBE2N, CDK15, KIF3C, OLA1, GART, CAMK1, STK36, MCM8, EHD3, TGFBR1, UHMK1, GRK6, MAPKAPK3, TARS1, RTCA, DGKB, KARS1, HSPE1, OBSCN, LRRK1, PRKCZ, ILF2, DDX24, WEE1, PIK3CB, NMNAT2, PKLR, PPIP5K1, PIP5K1C, ATP13A2, KALRN, MCM5, HCN1, ADCY1, CHEK2, DNAJA1, ABCC4, DGKH, MAPK10, CDK6, AAK1, HSPA4L, PAK6, SMARCA2, DTYM…	1023	1531	12075	1.2721	0.0206549	0.0200414
GOTERM_MF	GO:0030554~adenyl nucleotide binding	166	0.000613511	-3.21218	RFC4, UBE2C, ACSL4, PI4KA, KRAS, ABCG4, NEK7, NAV3, PAK2, MYO5A, MAP3K9, CDK4, TRPV4, UBE2N, CDK15, KIF3C, OLA1, GART, CAMK1, STK36, MCM8, EHD3, TGFBR1, UHMK1, GRK6, MAPKAPK3, TARS1, RTCA, DGKB, KARS1, HSPE1, OBSCN, LRRK1, PRKCZ, ILF2, DDX24, WEE1, PIK3CB, NMNAT2, PKLR, PPIP5K1, PIP5K1C, ATP13A2, KALRN, MCM5, HCN1, ADCY1, CHEK2, DNAJA1, ABCC4, DGKH, MAPK10, CDK6, AAK1, HSPA4L, PAK6, SMARCA2, DTYM…	1023	1542	12075	1.27068	0.0206549	0.0200414
GOTERM_MF	GO:0005524~ATP binding	158	0.00187114	-2.72789	RFC4, UBE2C, ACSL4, PI4KA, KRAS, ABCG4, NEK7, NAV3, PAK2, MYO5A, MAP3K9, CDK4, TRPV4, UBE2N, CDK15, KIF3C, OLA1, GART, CAMK1, STK36, MCM8, EHD3, TGFBR1, UHMK1, GRK6, MAPKAPK3, TARS1, RTCA, DGKB, KARS1, HSPE1, OBSCN, LRRK1, PRKCZ, ILF2, DDX24, WEE1, PIK3CB, NMNAT2, PKLR, PPIP5K1, PIP5K1C, ATP13A2, KALRN, MCM5, ADCY1, CHEK2, DNAJA1, ABCC4, DGKH, MAPK10, CDK6, AAK1, HSPA4L, PAK6, SMARCA2, DTYMK, DGK…	1023	1495	12075	1.24746	0.059058	0.0573038
GOTERM_MF	GO:0004385~guanylate kinase activity	6	0.00205494	-2.6872	MPP1, DLG4, CASK, DLG3, MPP2, DLG2	1023	12	12075	5.90176	0.0610439	0.0592307
GOTERM_MF	GO:0005096~GTPase activator activity	38	0.00407798	-2.38956	TBC1D22B, TBC1D9, RAPGEF2, ARHGEF10L, RAP1GAP, SRGAP3, RIN1, GARNL3, RUNDC1, SIPA1L1, ARRB1, ARHGEF11, RAP1GDS1, ARHGAP11A, CDC42EP4, TBC1D30, ARHGAP12, CHN1, SGSM2, RGS7, AGAP3, THY1, MYO9B, ELMOD1, ARHGAP44, ABR, MYO9A, AGAP1, ARHGAP42, SGSM1, TBC1D24, RIN3, KALRN, TRIP10, STXBP5, AXIN1, GDI1, ARHGAP17	1023	279	12075	1.60765	0.11441	0.111012
GOTERM_MF	GO:0008324~cation transmembrane transporter activity	72	0.00439659	-2.35688	CACNA2D1, ATP6V0E1, TMEM37, TRPV4, ASIC4, SLC45A4, KCNJ12, NCS1, TMEM63C, CACNA1I, CACNB1, GRIN2A, ATP1B1, SCN2B, SCN10A, CACNA1F, KCNK9, COX5A, TRPC5, KCNAB2, SLC8A2, TMCO1, COX7A2L, CACNA1D, CNNM4, CACNA1E, KCNJ6, OPRM1, SCN8A, KCNA1, JPH3, ATP13A2, DENND5A, ATP6V0A2, MAGT1, KCNB2, CACNB2, HCN1, CACNB3, ATP6AP1, KCNA2, SLC17A7, KCNJ9, ATP6V1E1, KCNAB1, KCNG3, MCOLN2, AQP1, COA6, KCNIP4, ATP1B4,…	1023	616	12075	1.37963	0.116857	0.113386
GOTERM_MF	GO:0035255~ionotropic glutamate receptor binding	7	0.00648685	-2.18797	SHANK3, DLG4, NETO1, DLG3, DLG2, NSF, SHANK2	1023	21	12075	3.93451	0.163793	0.158928
GOTERM_MF	GO:0008135~translation factor activity, RNA binding	19	0.00713485	-2.14661	CPEB3, CPEB1, EIF3G, ABTB1, EEF1B2, EEF1A1, EIF3E, CPEB2, SOX11, EIF4E, EIF4B, EIF5, EIF2D, EIF3D, EIF3F, EIF2A, EIF5A2, EEF1G, EIF3H	1023	114	12075	1.96725	0.171576	0.16648
GOTERM_MF	GO:0016917~GABA receptor activity	7	0.00829246	-2.08132	GABRA1, GABBR2, GABRD, GABRG2, GABRA5, GABRB2, GABRA4	1023	22	12075	3.75567	0.19035	0.184696
GOTERM_MF	GO:0005525~GTP binding	47	0.0102017	-1.99133	RAB3D, KRAS, GNAI3, EEF1A1, RHOF, ARL1, RERG, RHOBTB2, FKBP4, TRIM23, ADSS2, OLA1, THG1L, RAB36, RAB6B, NKIRAS2, EIF5, RASL12, SEPTIN10, ATL3, DIRAS1, EHD3, GNAZ, AGAP3, DNM1, RAB27B, GUCY1B1, RAB3A, ARF3, RTKN, RAB20, AGAP1, LRRK1, MAFK, ARL4D, RAB13, RALB, GNAO1, RAB3B, REM2, SEPTIN2, GBP2, GNAL, GNA13, RND2, GNA12, SCG5	1023	384	12075	1.4447	0.223994	0.217341
GOTERM_MF	GO:0004860~protein kinase inhibitor activity	15	0.0115538	-1.93728	RTN4RL1, HYAL2, PRKAR1A, NPM1, PRKAR1B, PRKAR2B, YWHAG, NCK1, CIB1, LRRC4B, TESC, CHP1, MAPK8IP1, TAOK3, RACK1	1023	85	12075	2.08297	0.243111	0.23589
GOTERM_MF	GO:0001105~RNA polymerase II transcription coactivator activity	9	0.0127001	-1.89619	HIPK2, PRRX1, MRTFB, HYAL2, MEF2A, SMARCA2, MRTFA, SOX4, SOX11	1023	38	12075	2.79557	0.256542	0.248922
GOTERM_MF	GO:0098811~transcriptional repressor activity, RNA polymerase II activating transcription factor binding	11	0.014013	-1.85347	HIPK2, PRRX1, MRTFB, HYAL2, NOTCH1, MEF2A, SMARCA2, MRTFA, SOX4, CLOCK, SOX11	1023	54	12075	2.40442	0.271239	0.263183
GOTERM_MF	GO:0017075~syntaxin-1 binding	6	0.0145019	-1.83857	UNC13A, CPLX2, VAMP3, STXBP5, STXBP1, NSF	1023	18	12075	3.93451	0.271239	0.263183
GOTERM_MF	GO:0051015~actin filament binding	20	0.0152495	-1.81674	LIMA1, TNNC2, PICK1, SYNE1, PPP1R9A, MAP1S, BIN1, PPP1R9B, CTNNA1, TRPV4, USH1C, FLNA, IQGAP2, CORO1B, TPM3, TLN2, CORO1A, SYNE2, CACNB2, FMNL1	1023	132	12075	1.78841	0.275036	0.266866
GOTERM_MF	GO:0032561~guanyl ribonucleotide binding	48	0.0163089	-1.78758	RAPGEF2, RAB3D, KRAS, GNAI3, EEF1A1, RHOF, ARL1, RERG, RHOBTB2, FKBP4, TRIM23, ADSS2, OLA1, THG1L, RAB36, RAB6B, NKIRAS2, EIF5, RASL12, SEPTIN10, ATL3, DIRAS1, EHD3, GNAZ, AGAP3, DNM1, RAB27B, GUCY1B1, RAB3A, ARF3, RTKN, RAB20, AGAP1, LRRK1, MAFK, ARL4D, RAB13, RALB, GNAO1, RAB3B, REM2, SEPTIN2, GBP2, GNAL, GNA13, RND2, GNA12, SCG5	1023	405	12075	1.39894	0.283999	0.275563
GOTERM_MF	GO:0019001~guanyl nucleotide binding	48	0.0170016	-1.76951	RAPGEF2, RAB3D, KRAS, GNAI3, EEF1A1, RHOF, ARL1, RERG, RHOBTB2, FKBP4, TRIM23, ADSS2, OLA1, THG1L, RAB36, RAB6B, NKIRAS2, EIF5, RASL12, SEPTIN10, ATL3, DIRAS1, EHD3, GNAZ, AGAP3, DNM1, RAB27B, GUCY1B1, RAB3A, ARF3, RTKN, RAB20, AGAP1, LRRK1, MAFK, ARL4D, RAB13, RALB, GNAO1, RAB3B, REM2, SEPTIN2, GBP2, GNAL, GNA13, RND2, GNA12, SCG5	1023	406	12075	1.39549	0.286194	0.277693
GOTERM_MF	GO:0008017~microtubule binding	29	0.0180964	-1.74241	RPS3, MAP1S, FGF13, CAMSAP1, CNN3, MAP7D3, CCSAP, SGIP1, TPPP, TRPV4, KIF3C, MARK4, CLIP3, DPYSL2, HOOK1, MAPRE2, KATNA1, TIAM1, DNM1, REEP1, MAP6, TPT1, KIF21A, MAPRE3, DCTN1, MTUS2, MAPRE1, CHP1, KLC3	1023	219	12075	1.56302	0.289435	0.280838
GOTERM_MF	GO:0004890~GABA-A receptor activity	6	0.0183404	-1.73659	GABRA1, GABRD, GABRG2, GABRA5, GABRB2, GABRA4	1023	19	12075	3.72743	0.289435	0.280838
GOTERM_MF	GO:0003785~actin monomer binding	7	0.0191461	-1.71792	LIMA1, MTSS2, PFN1, CORO1A, PRKCE, MRTFA, TWF1	1023	26	12075	3.17787	0.292993	0.284291
GOTERM_MF	GO:0030295~protein kinase activator activity	11	0.0377767	-1.42278	RPLP1, CAB39, CKS2, FGF13, PAK2, MAPK8IP2, HMGB1, CDK5R1, CKS1B, RPTOR, EFNA5	1023	63	12075	2.06093	0.556518	0.539988
GOTERM_MF	GO:0031210~phosphatidylcholine binding	6	0.040101	-1.39685	GPR12, APOC1, ESYT2, RPE65, PCTP, PITPNA	1023	23	12075	3.07918	0.556518	0.539988
GOTERM_MF	GO:0016462~pyrophosphatase activity	85	0.0406196	-1.39126	RFC4, RAP1GAP, RAB3D, KRAS, ABCG4, GNAI3, ATP6V0E1, EEF1A1, RHOF, MYO5A, KIF3C, OLA1, RAB6B, NKIRAS2, EIF5, MCM8, NUDT3, ATP1B1, ATL3, KLC1, CCDC102A, SLC25A42, MCM3, RAB27B, MOV10, GNG5, RUVBL1, MYO9B, ABCD3, ARF3, DSCC1, ADPRM, RAD51, ARL4D, RAB13, RALB, DDX24, REM2, EIF4B, ATP13A2, GBP2, ATP6V0A2, GNAL, MCM5, ABCC4, GNA12, KLC3, ATP6AP1, NUDT14, SMARCA2, ARL1, RERG, ATP6V1E1, TRIM23, DYNLT3, R…	1023	824	12075	1.2176	0.556518	0.539988
GOTERM_MF	GO:0046527~glucosyltransferase activity	5	0.0407746	-1.38961	POGLUT2, ALG8, UGCG, ALG6, PLOD3	1023	16	12075	3.6886	0.556518	0.539988
GOTERM_MF	GO:0019903~protein phosphatase binding	16	0.0469721	-1.32816	PPP1R9A, DLG4, PPP1R9B, FBXL2, PPME1, DLG3, AKAP11, FER, STAT3, EIF4EBP1, SHOC2, ARPP19, PARD3, PPP1R15A, RACK1, TP53	1023	111	12075	1.70141	0.611823	0.59365
GOTERM_MF	GO:0030552~cAMP binding	6	0.0472497	-1.3256	RAPGEF2, PRKAR1A, PRKAR1B, HCN1, PDE4A, PRKAR2B	1023	24	12075	2.95088	0.611823	0.59365
GOTERM_MF	GO:0031489~myosin V binding	5	0.0498618	-1.30223	RAB6B, RAB3B, RAB27B, RAB3D, RAB3A	1023	17	12075	3.47162	0.629505	0.610806
GOTERM_MF	GO:0004143~diacylglycerol kinase activity	4	0.0596402	-1.22446	DGKH, DGKB, DGKE, DGKZ	1023	11	12075	4.29219	0.734593	0.712773
GOTERM_MF	GO:0000049~tRNA binding	9	0.0630926	-1.20002	RPL35A, AIMP1, THG1L, YARS1, EEF1A1, TRMT10A, FDXACB1, KARS1, EIF2A	1023	51	12075	2.08297	0.734712	0.712889
GOTERM_MF	GO:0019205~nucleobase-containing compound kinase activity	9	0.0630926	-1.20002	MPP1, DLG4, CASK, AK2, DTYMK, DLG3, MPP2, DLG2, NME5	1023	51	12075	2.08297	0.734712	0.712889
GOTERM_MF	GO:0015276~ligand-gated ion channel activity	19	0.0640145	-1.19372	GABRA1, DLG4, GABRG2, SLC17A7, KCNJ9, DLG3, KCNJ6, JPH3, AQP1, GRIN2B, GABRD, KCNJ12, PTK2B, GABRA5, KCNQ5, GRIN2A, HCN1, GABRB2, GABRA4	1023	145	12075	1.54667	0.734712	0.712889
GOTERM_MF	GO:0008066~glutamate receptor activity	6	0.0729298	-1.13709	GRIN2B, PTK2B, GRM2, GRM3, GRIN2A, GRM5	1023	27	12075	2.623	0.818434	0.794125

## Sheet: 1dpl-GBM_shared_genes
Category	Term	Count	PValue	log10(Pvalue)	Genes	List.Total	Pop.Hits	Pop.Total	Fold.Enrichment	Benjamini	FDR
GOTERM_BP	GO:0072599~establishment of protein localization to endoplasmic reticulum	65	1.88253e-31	-30.7253	RPS8, RPS13, SEC61B, RPLP2, RPS7, RPL13A, RPL9, RPS21, RPS9, RPS16, RPL34, RPL13, RPL23, RPS15, SSR3, RPL35, FAU, SRP9, RPSA, RPS28, RPL12, RPS6, UBA52, RPS18, RPL19, RPL29, RPS14, RPL21, RPS11, RPL35A, RPS3, RPL23A, RPL27, RPS12, RPL17, RPL37A, SEC61A1, RPL36, SEC61G, RPL39, RPS10, RPL6, RPL30, RPS2, RPS23, RPL18, RPL38, RPS19, RPL14, RPLP1, RPS4X, RPS25, RPS5, RPL4, RPL10A, RPS3A, PMM2, RPL7, R…	1966	108	16130	4.93788	9.73833e-28	9.20934e-28
GOTERM_BP	GO:0072657~protein localization to membrane	149	1.71448e-27	-26.7659	LRRC4, EHD2, FGF13, ANXA2, RPS8, RPS13, RER1, TMEM150A, MYO5A, RPL13A, TMED2, RPS16, ITGB2, NPC1, RAP2A, VAMP5, EHD3, MAPK8, APOE, TFDP1, TRAM1, CACNA1A, SPTBN1, PACS1, PID1, RPS15, SSR3, GOPC, DLG2, RPL35, PRKCZ, TRAM2, SRP9, RPSA, UBA52, NLGN2, RPL19, KCNB2, TIMM9, CHP1, RPS14, RPL21, RPS11, GOLGA4, RPS3, RPL23A, RPL27, RPL17, SEC61A1, RPL36, MIEF2, EFR3B, RPL39, SHANK3, RAB8A, RPL30, RPS2, RPL…	1966	489	16130	2.49993	4.43451e-24	4.19362e-24
GOTERM_BP	GO:0006612~protein targeting to membrane	82	2.72857e-26	-25.5641	ANXA2, RPS8, RPS13, SEC61B, RPLP2, RPS7, RPL13A, RPL9, RPS21, RPS9, TMED2, TAOK2, RPS16, RPL34, RPL13, EHD3, RPL23, TRAM1, SPTBN1, PACS1, RPS15, SSR3, RPL35, TRAM2, FAU, SRP9, RPSA, RPS28, RPL12, RPS6, UBA52, RPS18, RPL19, KCNB2, CHP1, RPL29, RPS14, RPL21, RPS11, RPL35A, RPS3, RPL23A, RPL27, ANK3, RPS12, RPL17, RPL37A, SEC61A1, MYO1C, RPL36, MIEF2, RPL39, RPS10, RPL6, RPL30, RPS2, RPS23, RPL18, R…	1966	190	16130	3.54088	4.70496e-23	4.44938e-23
GOTERM_BP	GO:0007399~nervous system development	419	4.41351e-25	-24.3552	SYT3, TMEM107, ARPC5, EGR3, FGFR2, GSK3B, KCNK3, PRMT5, GABRA4, AMBRA1, UNC5A, PCDH18, NF1, GAS7, MMP14, SEZ6L2, ZEB1, SEPTIN2, AP006333.1, ACTL6A, CDK6, HSPA5, HLX, STX1B, SMARCA2, EFHC1, MYC, MT-CO1, NOTCH3, CRIM1, SHANK3, SH3TC2, DPYSL2, BTBD6, NME1, CPNE5, CHRM3, HIPK2, CUX2, IGSF9B, APP, KCNQ2, L1CAM, SNX3, GPRC5B, GSDME, TACC1, GNAO1, VASP, GLIS2, PPP1R9A, BCR, FRY, TTLL7, STXBP1, ALCAM, DA…	1966	2170	16130	1.58418	5.70777e-22	5.39772e-22
GOTERM_BP	GO:0090150~establishment of protein localization to membrane	117	2.14999e-23	-22.6676	ANXA2, RPS8, RPS13, RER1, TMEM150A, RPL13A, TMED2, RPS16, NPC1, VAMP5, EHD3, MAPK8, TFDP1, TRAM1, SPTBN1, PACS1, PID1, RPS15, SSR3, GOPC, RPL35, TRAM2, SRP9, RPSA, UBA52, RPL19, KCNB2, TIMM9, CHP1, RPS14, RPL21, RPS11, GOLGA4, RPS3, RPL23A, RPL27, RPL17, SEC61A1, RPL36, MIEF2, EFR3B, RPL39, RPL30, RPS2, RPL18, RPL38, RPS19, TESC, CNST, RPL14, GOLGA7B, RPS5, RPL4, RPL10A, CDK5R1, CIB1, KIF5B, RPL5…	1966	368	16130	2.60849	2.22438e-20	2.10355e-20
GOTERM_BP	GO:0031175~neuron projection development	196	8.43056e-22	-21.0741	SYT3, RAPH1, FGF13, CAMSAP1, KRAS, FGFR2, GSK3B, GRIP1, SLITRK5, APOE, UHMK1, BCL11B, UNC5A, CAMSAP2, SEPTIN2, AP006333.1, SEMA5A, STX1B, TNC, SHANK3, SYT2, DPYSL2, EZH2, NME1, CPNE5, NUMBL, CUX2, APP, L1CAM, SNX3, GPRC5B, NCK1, PRRX1, GNAO1, CIB1, TBC1D24, SRCIN1, VASP, HMGB1, IQGAP1, PPP1R9A, FRY, STMN4, ZNF335, STXBP1, DAG1, ALCAM, DMD, APBB1, SETX, ID1, RPS6KA5, CAMK2B, ETV4, PPP1R9B, MEGF8, …	1966	817	16130	1.96827	7.26855e-19	6.87372e-19
GOTERM_BP	GO:0099537~trans-synaptic signaling	156	1.12569e-20	-19.9486	DNAJC5, STX11, SYT3, SHC3, KRAS, EGR3, MAPK8IP2, CHRNA2, GSK3B, MYO5A, CACNA2D2, KCNK3, BAIAP2, SLITRK5, PCDH8, GABRD, USP14, CHRNB3, IQSEC2, SCN2B, APOE, CACNA1A, GRIN2C, SLC8A2, CACNA1E, CHRM2, OPRM1, SLC6A1, NF1, DLG2, JPH3, ADGRL1, PRKCZ, PCLO, CPLX2, SYNJ1, SYT14, KCNJ10, RASGRF1, NLGN2, PIP5K1C, NAPB, KALRN, GPR52, RAP1B, SNAP47, NEURL1, STX1B, SIPA1L1, NISCH, SHANK3, SYT2, RAB8A, RPH3A, GR…	1966	604	16130	2.11904	7.27896e-18	6.88357e-18
GOTERM_BP	GO:0099536~synaptic signaling	156	1.12569e-20	-19.9486	DNAJC5, STX11, SYT3, SHC3, KRAS, EGR3, MAPK8IP2, CHRNA2, GSK3B, MYO5A, CACNA2D2, KCNK3, BAIAP2, SLITRK5, PCDH8, GABRD, USP14, CHRNB3, IQSEC2, SCN2B, APOE, CACNA1A, GRIN2C, SLC8A2, CACNA1E, CHRM2, OPRM1, SLC6A1, NF1, DLG2, JPH3, ADGRL1, PRKCZ, PCLO, CPLX2, SYNJ1, SYT14, KCNJ10, RASGRF1, NLGN2, PIP5K1C, NAPB, KALRN, GPR52, RAP1B, SNAP47, NEURL1, STX1B, SIPA1L1, NISCH, SHANK3, SYT2, RAB8A, RPH3A, GR…	1966	604	16130	2.11904	7.27896e-18	6.88357e-18
GOTERM_BP	GO:0048666~neuron development	217	1.97288e-20	-19.7049	SYT3, RAPH1, FGF13, CAMSAP1, KRAS, FGFR2, GSK3B, GRIP1, SLITRK5, APOE, UHMK1, BCL11B, UNC5A, CAMSAP2, SEPTIN2, HCN1, AP006333.1, SEMA5A, STX1B, TNC, SHANK3, SYT2, DPYSL2, EZH2, NME1, CPNE5, NUMBL, CUX2, APP, L1CAM, SNX3, GPRC5B, NCK1, PRRX1, GNAO1, CIB1, TBC1D24, SRCIN1, VASP, HMGB1, IQGAP1, PPP1R9A, FRY, STMN4, ZNF335, STXBP1, DAG1, ALCAM, DMD, APBB1, SETX, ID1, CTHRC1, RPS6KA5, CAMK2B, ETV4, PP…	1966	965	16130	1.84494	1.13396e-17	1.07237e-17
GOTERM_BP	GO:0022008~neurogenesis	291	1.09902e-19	-18.959	SYT3, RAPH1, FGF13, CAMSAP1, KRAS, FGFR2, GSK3B, GRIP1, SLITRK5, CXCR4, XRN2, PRMT5, APOE, TGFBR1, UHMK1, SDK2, BCL11B, UNC5A, NF1, CAMSAP2, MMP14, SYNJ1, ZEB1, SEPTIN2, HMGB2, HCN1, AP006333.1, SEMA5A, CDK6, STX1B, TNC, MYC, NOTCH3, NCOA1, TUBB2B, SHANK3, SH3TC2, SYT2, DPYSL2, BTBD6, EZH2, NME1, CPNE5, NUMBL, HIPK2, CUX2, ZNF536, APP, L1CAM, SNX3, GSDME, GPRC5B, NCK1, TRAPPC9, PRRX1, GNAO1, CIB1…	1966	1447	16130	1.64997	5.2085e-17	4.92558e-17
GOTERM_BP	GO:0019080~viral gene expression	73	1.10755e-19	-18.9556	NUP62, RPS8, RPS13, TRIM62, RPLP2, RPS7, RPL13A, RPL9, RPS21, RPS9, POLR2H, NUP35, RPS16, RPL34, RPL13, POLR2F, RPL23, NUP37, RPS15, RPL35, FAU, RPSA, RPS28, RPL12, RPS6, UBA52, RPS18, RPL19, RPL29, RPS14, RPL21, RPS11, EIF3F, AAAS, RPL35A, RPS3, SUPT4H1, RPL23A, RPL27, RPS12, RPL17, RPL37A, POLR2L, RPL36, RPL39, RPS10, RPL6, RPL30, RPS2, RPS23, RPL18, RPL38, EIF3B, RPS19, NUP43, RPL14, RPLP1, RP…	1966	192	16130	3.11941	5.2085e-17	4.92558e-17
GOTERM_BP	GO:0035556~intracellular signal transduction	468	1.36051e-19	-18.8663	F2R, RFC4, NUP62, PI4KA, IKBKE, PLEK, LCP2, FGFR2, GARNL3, RAB30, GSK3B, ARHGEF9, ADRA1B, NKIRAS2, SHOC2, IQSEC2, PRMT5, ARHGAP39, CISH, DUSP22, MAPKAPK3, SH2B1, FGD6, GRIN2C, MDFI, ZDHHC17, BCL2L10, WWC1, LAMTOR5, NF1, SCAI, KSR2, NET1, SEZ6L2, BTK, RAB22A, ARHGAP22, TNRC6C, DNAJA1, CHEK2, AP006333.1, DGKH, RASGRF2, PLEKHG5, SIRT3, AKAP11, MYC, NISCH, SHANK3, PSD, GAB2, MAP4K5, ADRB1, HIPK2, RAB…	1966	2657	16130	1.44512	5.86492e-17	5.54634e-17
GOTERM_BP	GO:0019083~viral transcription	70	2.25356e-19	-18.6471	NUP62, RPS8, RPS13, TRIM62, RPLP2, RPS7, RPL13A, RPL9, RPS21, RPS9, POLR2H, NUP35, RPS16, RPL34, RPL13, POLR2F, RPL23, NUP37, RPS15, RPL35, FAU, RPSA, RPS28, RPL12, RPS6, UBA52, RPS18, RPL19, RPL29, RPS14, RPL21, RPS11, AAAS, RPL35A, RPS3, SUPT4H1, RPL23A, RPL27, RPS12, RPL17, RPL37A, POLR2L, RPL36, RPL39, RPS10, RPL6, RPL30, RPS2, RPS23, RPL18, RPL38, RPS19, NUP43, RPL14, RPLP1, RPS4X, PFN1, RPS…	1966	181	16130	3.173	8.96742e-17	8.48031e-17
GOTERM_BP	GO:0030182~neuron differentiation	254	7.09033e-19	-18.1493	SYT3, RAPH1, FGF13, CAMSAP1, KRAS, FGFR2, GSK3B, GRIP1, SLITRK5, XRN2, APOE, TGFBR1, UHMK1, SDK2, BCL11B, UNC5A, CAMSAP2, ZEB1, SEPTIN2, HCN1, AP006333.1, SEMA5A, STX1B, TNC, NOTCH3, NCOA1, SHANK3, SYT2, DPYSL2, EZH2, NME1, CPNE5, NUMBL, HIPK2, CUX2, ZNF536, APP, L1CAM, SNX3, GSDME, GPRC5B, NCK1, TRAPPC9, PRRX1, GNAO1, CIB1, TBC1D24, SRCIN1, VASP, HMGB1, IQGAP1, PPP1R9A, FRY, RAP1GAP, STMN4, ZNF3…	1966	1226	16130	1.69979	2.61988e-16	2.47756e-16
GOTERM_BP	GO:0015031~protein transport	350	7.76375e-19	-18.1099	CANX, F2R, STXBP2, NUP62, RPS13, LMAN2L, PLEK, LCP2, CD276, GSK3B, CTSA, DENND1A, RPL13A, NUP35, DNAJC1, TNFSF13B, RAB11FIP3, GDAP1, VIP, EHD3, KPNA6, APOE, TGFBR1, UHMK1, PCSK5, MDFI, NUP37, PACS1, CACNA1E, RPS15, SSR3, NF1, GOPC, SRP9, RPSA, CREBRF, PCLO, TOMM20, RAB22A, RPL19, KCNB2, TIMM9, CHP1, RPS14, RPL21, RPS11, AAAS, LRP1B, RPS3, ACTL6A, SEMA5A, RPL23A, STX1B, SIRT3, SEC61A1, MIEF2, TBC1…	1966	1860	16130	1.54385	2.67746e-16	2.53202e-16
GOTERM_BP	GO:0006364~rRNA processing	87	4.1336e-18	-17.3837	TSR2, RPS8, RPS13, ERI1, RPLP2, RPS7, RPL13A, RPL9, RPF1, RPS21, RPS9, XRN2, RPS16, RPL34, RPL13, RPL23, WDR3, BUD23, PNO1, RPS15, RPL35, FAU, RPSA, RPS28, RPL12, RPS6, UBA52, SNU13, RPS18, EMG1, RRP7A, RPL19, RPL29, RPS14, RPL21, RPS11, UTP6, NOP10, RPL35A, RPS3, RPL23A, RPL27, RPS12, RRP9, RPL17, RPL37A, RPL36, EXOSC8, EXOSC6, RPL39, RPS10, RPL6, RPL30, RPS2, RPS23, RPL18, RPL38, RPS19, GAR1, F…	1966	269	16130	2.65349	1.33645e-15	1.26385e-15
GOTERM_BP	GO:0006401~RNA catabolic process	81	4.3738e-17	-16.3591	RPS8, RPS13, ERI1, NCBP2, RPLP2, RPS7, PPP2CA, RPL13A, RPL9, RPS21, RPS9, CTIF, XRN2, RPS16, RPL34, RPL13, RPL23, UHMK1, LSM3, RPS15, RPL35, FAU, RPSA, RPS28, RPL12, RPS6, UBA52, RPS18, TNRC6C, RPL19, RPL29, RPS14, RPL21, RPS11, LSM5, RPL35A, RPS3, RPL23A, RPL27, CNOT9, RNASEH2A, RPS12, EIF3E, LSM1, RPL17, RPL37A, RPL36, EXOSC8, EXOSC6, RPL39, ZFP36L2, RPS10, RPL6, ZFP36L1, RPL30, RPS2, RPS23, RP…	1966	249	16130	2.66893	1.33092e-14	1.25863e-14
GOTERM_BP	GO:1902582~single-organism intracellular transport	162	6.99909e-17	-16.155	F2R, NUP62, HYAL2, ANXA2, RPS8, RPS13, SULF2, ZFYVE9, NCBP2, GSK3B, MYO5A, KIF3C, RPL13A, STARD4, NUP35, TMED2, STING1, RPS16, EHD3, KPNA6, TGFBR1, HMOX1, TRAM1, MDFI, NUP37, SPTBN1, PACS1, RPS15, SSR3, NF1, RPL35, PRKCZ, TRAM2, SRP9, RPSA, CPLX2, TOMM20, BTK, PPM1A, UBA52, RPL19, LYN, KCNB2, TIMM9, SYNE2, CHP1, RPS14, RPL21, RPS11, AAAS, KLC3, RPS3, SEMA5A, RPL23A, RPL27, RPL17, SEC61A1, RPL36, …	1966	695	16130	1.91241	2.01146e-14	1.9022e-14
GOTERM_BP	GO:0034655~nucleobase-containing compound catabolic process	105	3.8596e-16	-15.4135	RPS8, RPS13, NCBP2, GDA, RPL13A, XRN2, FOXL2, RPS16, UHMK1, DCTPP1, LSM3, ADPRM, RPS15, RPL35, RPSA, UBA52, TNRC6C, RPL19, RPS14, RPL21, RPS11, HMGB2, RPS3, RPL23A, RPL27, CDA, RPL17, RPL36, EXOSC8, EXOSC6, RPL39, RPL30, RPS2, RPL18, RPL38, RPS19, RPL14, TYMP, NUDT5, RPS5, DNASE2B, RPL4, RPL10A, DIS3L2, APAF1, RPL5, ITPA, AHCY, RPLP0, HMGB1, RPL10, RPL18A, MGAT1, ERI1, RPLP2, RPS7, PPP2CA, RPL9, …	1966	380	16130	2.26703	1.05083e-13	9.93745e-14
GOTERM_BP	GO:0007264~small GTPase mediated signal transduction	131	7.8866e-16	-15.1031	F2R, SHC3, NUP62, KRAS, RAB30, RHOBTB2, ARHGEF9, ARHGEF11, DENND1A, SPRY1, DOCK3, RAB6B, NKIRAS2, SHOC2, COL1A2, RRAS, IQSEC2, RAP2A, MCF2L, DOCK4, GPR18, APOE, HMOX1, MAPKAPK3, RALGPS1, FGD6, ABI2, NF1, SCAI, AGAP1, OBSCN, LRRK1, NET1, F2RL2, FGD4, IQSEC3, RAB4B, IQSEC1, RHOH, RASGRF1, REM2, RAB22A, KALRN, ARHGAP5, CDC42EP5, CHP1, CYTH4, RAP1B, RGL1, RASGRF2, PLEKHG5, RASGRP3, RAPGEF5, CDC42EP4,…	1966	527	16130	2.03944	2.03987e-13	1.92906e-13
GOTERM_BP	GO:0006886~intracellular protein transport	208	1.63843e-14	-13.7856	F2R, NUP62, RPS13, GSK3B, CTSA, RPL13A, NUP35, GDAP1, EHD3, KPNA6, TGFBR1, UHMK1, MDFI, PACS1, RPS15, SSR3, NF1, SRP9, RPSA, TOMM20, RPL19, KCNB2, TIMM9, CHP1, RPS14, RPL21, RPS11, RPS3, ACTL6A, SEMA5A, RPL23A, STX1B, SEC61A1, MIEF2, TBC1D30, TMED10, RPL39, HID1, RPL30, RPL18, RPS19, GOLGA7B, RAC2, AP2B1, RAB23, CIB1, BICD2, RPL10, POLA2, DACT3, ANKRD50, DAG1, STAT3, KPNA2, TCIM, TAOK2, RPL34, AT…	1966	1020	16130	1.67307	4.036e-12	3.81676e-12
GOTERM_BP	GO:0048812~neuron projection morphogenesis	130	2.14821e-14	-13.6679	SYT3, RAPH1, FGF13, KRAS, SLITRK4, KIRREL3, FGFR2, SEMA6B, MAPK8IP2, GSK3B, RTN4, BAIAP2, LRP8, SLITRK5, PLXNA3, UNC5C, CPNE1, EFNA5, AMIGO1, VEGFA, APOE, TSKU, CACNA1A, BCL11B, SPTBN1, UNC5A, PLPPR4, PRKCZ, WEE1, KALRN, CPNE9, ADCY1, GOLGA4, AP006333.1, SEMA5A, NGFR, SIPA1L1, IFRD1, SHANK3, SYT2, RAB8A, DPYSL2, CPNE5, NUMBL, NEO1, CUX2, RAB3A, APP, PLXNB3, L1CAM, CDK5R1, KIF5B, RGMA, SRCIN1, LGI…	1966	543	16130	1.96424	5.05123e-12	4.77685e-12
GOTERM_BP	GO:0050804~modulation of synaptic transmission	82	3.00574e-14	-13.522	UNC13A, PPP1R9A, DLG4, RAPGEF2, KRAS, MAPK8IP2, GRM3, NPAS4, STXBP1, PTEN, CACNA2D2, RIMS3, BAIAP2, LRP8, IQSEC2, GRIN2A, CAMK2B, ACHE, ABHD6, APOE, CACNA1A, SLC8A2, PPP1R9B, SLC6A1, NF1, JPH3, SLC24A2, PRKCZ, YWHAG, CPLX2, KCNJ10, RASGRF1, CAMK2A, NLGN2, NAPB, PRKN, KALRN, USP46, NTSR1, RAP1B, SNAP47, CRTC1, NEURL1, SIPA1L1, STX1B, SNCG, PLCL1, NISCH, CDC20, SHANK3, PTK2B, RIMS1, RAB8A, SYNGR1, …	1966	280	16130	2.40274	6.54526e-12	6.18971e-12
GOTERM_BP	GO:0048468~cell development	348	3.14176e-14	-13.5028	SYT3, RAPH1, FGF13, CAMSAP1, KRAS, SMAD5, FGFR2, GSK3B, GRIP1, SLITRK5, FOXL2, CXCR4, PRMT5, APOE, TGFBR1, UHMK1, BCL11B, UNC5A, NF1, CAMSAP2, GOPC, NET1, SYNJ1, ZEB1, BTK, SEPTIN2, HMGB2, HCN1, AP006333.1, SEMA5A, CDK6, STX1B, SMARCA2, TNC, MYC, NOTCH3, NCOA1, SHANK3, SH3TC2, SYT2, DPYSL2, STRBP, RPS19, ANGPT2, EZH2, NME1, CPNE5, NUMBL, CUX2, RPS6KA2, ZNF536, APP, L1CAM, SNX3, GPRC5B, NCK1, PRRX…	1966	1968	16130	1.45079	6.54526e-12	6.18971e-12
GOTERM_BP	GO:0009966~regulation of signal transduction	455	3.20572e-14	-13.4941	F2R, RFC4, NUP62, CNKSR2, IKBKE, PLEK, FGFR2, GARNL3, GSK3B, ARHGEF9, ADRA1B, PFDN5, SHOC2, IQSEC2, PRMT5, KCTD16, ARHGAP39, CISH, DUSP22, MAPKAPK3, SH2B1, FGD6, MDFI, ZDHHC17, BCL2L10, PRELID1, WWC1, FST, LAMTOR5, NF1, SCAI, MMP14, NET1, SEZ6L2, ZEB1, ARHGAP22, DNAJA1, CHEK2, AP006333.1, USP20, TLE5, RASGRF2, HSPA5, PLEKHG5, AAK1, STX1B, SIRT3, AKAP11, MYC, SHANK3, EGFL7, SH3TC2, G0S2, PSD, MAP4…	1966	2728	16130	1.36842	6.54526e-12	6.18971e-12
GOTERM_BP	GO:0006605~protein targeting	156	3.28971e-14	-13.4828	F2R, NUP62, HYAL2, KIF13B, ANXA2, RPS8, RPS13, SULF2, ZFYVE9, GSK3B, VTI1A, RPL13A, NUP35, TMED2, STING1, RPS16, GDAP1, FBXW7, EHD3, KPNA6, TGFBR1, TRAM1, MDFI, SPTBN1, PACS1, RPS15, SSR3, NF1, RPL35, GPR26, TRAM2, SRP9, RPSA, TOMM20, PPM1A, UBA52, RPL19, KCNB2, TIMM9, CHP1, RPS14, RPL21, RPS11, GOLGA4, RPS3, ACTL6A, SEMA5A, RPL23A, RPL27, RPL17, SEC61A1, RPL36, SEC61G, MIEF2, RPL39, TIMM8B, RPL3…	1966	701	16130	1.82582	6.54526e-12	6.18971e-12
GOTERM_BP	GO:0048167~regulation of synaptic plasticity	52	1.10631e-13	-12.9561	UNC13A, PPP1R9A, DLG4, RAPGEF2, KRAS, NPAS4, STXBP1, PTEN, BAIAP2, IQSEC2, GRIN2A, CAMK2B, ABHD6, APOE, SLC8A2, NF1, JPH3, SLC24A2, PRKCZ, YWHAG, CPLX2, KCNJ10, RASGRF1, CAMK2A, KALRN, SNAP47, CRTC1, NEURL1, SIPA1L1, CDC20, SHANK3, PTK2B, RAB8A, SYNGR1, FGF14, GRM5, DRD1, PLK2, CPEB3, MAPK1, PICK1, SORCS3, RAB3A, NEUROD2, BRAF, SYT7, NETO1, MECP2, SLC8A3, ATP2B2, SHISA7, SHANK2	1966	140	16130	3.04738	2.1196e-11	2.00447e-11
GOTERM_BP	GO:0050767~regulation of neurogenesis	151	1.37576e-13	-12.8615	SYT3, KIF13B, FGF13, SEMA6B, GSK3B, CLCF1, RTN4, TRPV4, BAIAP2, LRP8, CAMK1, CXCR4, NCS1, PLXNA3, RAP2A, GPR183, PRMT5, CPNE1, EFNA5, KLF4, AMIGO1, VEGFA, APOE, SF3A2, CACNA1A, BCL11B, OPRM1, NF1, SYNJ1, MYCL, ZEB1, KALRN, CPNE9, LYN, BRINP1, HMGB2, GOLGA4, SEMA5A, NEURL1, NGFR, STX1B, SIPA1L1, DTX1, IFRD1, MYC, NOTCH3, FKBP4, NCOA1, SHANK3, HIF1A, SYT2, DPYSL2, EZH2, NME1, CPNE5, PLK2, NUMBL, NE…	1966	682	16130	1.81653	2.54172e-11	2.40365e-11
GOTERM_BP	GO:0010975~regulation of neuron projection development	105	1.61806e-13	-12.791	SYT3, KIF13B, FGF13, SEMA6B, GSK3B, RTN4, TRPV4, BAIAP2, LRP8, CAMK1, NCS1, PLXNA3, RAP2A, EFNA5, KLF4, AMIGO1, VEGFA, APOE, SF3A2, CACNA1A, KALRN, CPNE9, LYN, GOLGA4, SEMA5A, NEURL1, NGFR, STX1B, SIPA1L1, IFRD1, FKBP4, SHANK3, SYT2, DPYSL2, EZH2, NME1, CPNE5, PLK2, NEGR1, ZMYND8, CUX2, PLXNB3, L1CAM, SNX3, CDK5R1, GPRC5B, NCK1, PRRX1, CIB1, RGMA, SRCIN1, ABL2, IQGAP1, UNC13A, PPP1R9A, RAPGEF2, P…	1966	413	16130	2.08588	2.88629e-11	2.72951e-11
GOTERM_BP	GO:0043043~peptide biosynthetic process	148	2.0681e-13	-12.6844	MRPL52, RPS8, RPS13, TRNAU1AP, ABTB1, NCBP2, NIBAN1, CDK4, RPL13A, RPS16, EEF1G, EIF3H, UHMK1, PCSK5, RPS15, KARS1, CNDP2, RPL35, MRPL11, SRP9, RPSA, EIF4EBP1, UBA52, PPA1, TNRC6C, RPL19, RPS14, RPL21, RPS11, RPS3, MRPL35, DAP3, RPL23A, RPL27, MRPL40, CPEB1, MRPL49, CPEB2, RPL17, RPL36, RPL39, RPL30, RPS2, RPL18, RPL38, RPS19, MRPS6, CDKAL1, RPL14, NDUFA7, PER2, MRPS33, YAE1, DAPK1, RPS5, RPL4, T…	1966	667	16130	1.82048	3.5661e-11	3.37239e-11
GOTERM_BP	GO:0006412~translation	143	3.65147e-13	-12.4375	MRPL52, RPS8, RPS13, TRNAU1AP, ABTB1, NCBP2, NIBAN1, CDK4, RPL13A, RPS16, EEF1G, EIF3H, UHMK1, RPS15, KARS1, RPL35, MRPL11, SRP9, RPSA, EIF4EBP1, UBA52, PPA1, TNRC6C, RPL19, RPS14, RPL21, RPS11, RPS3, MRPL35, DAP3, RPL23A, RPL27, MRPL40, CPEB1, MRPL49, CPEB2, RPL17, RPL36, RPL39, RPL30, RPS2, RPL18, RPL38, RPS19, MRPS6, CDKAL1, RPL14, NDUFA7, PER2, MRPS33, YAE1, DAPK1, RPS5, RPL4, TRMT112, RPL10A…	1966	641	16130	1.83033	6.09324e-11	5.76225e-11
GOTERM_BP	GO:0072594~establishment of protein localization to organelle	147	3.91346e-13	-12.4074	F2R, NUP62, HYAL2, RPS8, RPS13, SULF2, ZFYVE9, GSK3B, VTI1A, RPL13A, NUP35, STING1, RPS16, GDAP1, FBXW7, KPNA6, DDIT3, MAPK8, TFDP1, TGFBR1, MDFI, SPTBN1, PACS1, RPS15, SSR3, NF1, RPL35, GPR26, SRP9, RPSA, TOMM20, PPM1A, UBA52, RPL19, TIMM9, CHP1, RPS14, RPL21, RPS11, DNAJA1, GOLGA4, RPS3, ACTL6A, SEMA5A, RPL23A, RPL27, RPL17, SEC61A1, RPL36, SEC61G, RPL39, TIMM8B, RPL30, RPS2, RPL18, RPL38, RPS1…	1966	666	16130	1.8109	6.32636e-11	5.98271e-11
GOTERM_BP	GO:0031346~positive regulation of cell projection organization	84	4.79514e-13	-12.3192	UNC13A, SYT3, PPP1R9A, RAPGEF2, FNBP1L, GSK3B, DMD, BAIAP2, BCAS3, NFE2L2, APBB1, ARHGEF7, LRP8, SETX, ENC1, CAMK1, CAMK2B, EFNA5, AMIGO1, VEGFA, TGFBR1, TRPC5, APOE, TIAM1, SF3A2, MEGF8, NEDD4L, CDKL5, WASF2, GPM6A, PRKN, KALRN, KCTD17, CPNE9, LYN, CNTN1, CDC42EP5, CAMK1D, GOLGA4, CRTC1, SEMA5A, HDAC4, NEURL1, NTRK3, NGFR, FN1, MAGI2, CDC42EP4, BMPR2, SHANK3, NCKAP1, CORO1B, PTK2B, RIMS1, SYT2, …	1966	304	16130	2.26703	7.51675e-11	7.10844e-11
GOTERM_BP	GO:0045664~regulation of neuron differentiation	129	5.43868e-13	-12.2645	SYT3, KIF13B, FGF13, SEMA6B, GSK3B, RTN4, TRPV4, BAIAP2, LRP8, CAMK1, NCS1, PLXNA3, RAP2A, CPNE1, EFNA5, KLF4, AMIGO1, VEGFA, APOE, SF3A2, CACNA1A, BCL11B, MYCL, ZEB1, KALRN, CPNE9, LYN, BRINP1, GOLGA4, SEMA5A, NEURL1, NGFR, STX1B, SIPA1L1, DTX1, IFRD1, NOTCH3, FKBP4, NCOA1, SHANK3, SYT2, DPYSL2, EZH2, NME1, CPNE5, PLK2, NEGR1, ZMYND8, CUX2, ZNF536, APP, PLXNB3, L1CAM, SNX3, CDK5R1, GPRC5B, NCK1,…	1966	560	16130	1.88996	8.27478e-11	7.82529e-11
GOTERM_BP	GO:0051960~regulation of nervous system development	163	6.56837e-13	-12.1825	SYT3, KIF13B, FGF13, SLITRK4, SEMA6B, GSK3B, CLCF1, RTN4, TRPV4, BAIAP2, LRP8, SLITRK5, CAMK1, CXCR4, NCS1, PLXNA3, RAP2A, GPR183, PRMT5, CPNE1, EFNA5, KLF4, AMIGO1, VEGFA, APOE, SF3A2, CACNA1A, BCL11B, OPRM1, NF1, ADGRL1, SYNJ1, MYCL, ZEB1, NLGN2, LRRC4B, KALRN, CPNE9, LYN, BRINP1, HMGB2, GOLGA4, AP006333.1, SEMA5A, NEURL1, NGFR, STX1B, SIPA1L1, DTX1, IFRD1, MYC, NOTCH3, FKBP4, NCOA1, SHANK3, HI…	1966	769	16130	1.73905	9.70805e-11	9.18071e-11
GOTERM_BP	GO:0043604~amide biosynthetic process	157	1.06262e-12	-11.9736	MRPL52, RPS8, RPS13, TRNAU1AP, ST6GALNAC6, ABTB1, NCBP2, NIBAN1, CDK4, RPL13A, SPTSSA, RPS16, EEF1G, SMPD3, EIF3H, UHMK1, PCSK5, RPS15, KARS1, CNDP2, RPL35, MRPL11, SRP9, RPSA, EIF4EBP1, UBA52, PPA1, TNRC6C, RPL19, RPS14, RPL21, RPS11, RPS3, MRPL35, DAP3, RPL23A, RPL27, MRPL40, CPEB1, MRPL49, CERS5, CPEB2, RPL17, RPL36, RPL39, RPL30, RPS2, RPL18, RPL38, RPS19, MRPS6, CDKAL1, RPL14, NDUFA7, PER2, …	1966	736	16130	1.75014	1.52693e-10	1.44398e-10
GOTERM_BP	GO:0006518~peptide metabolic process	170	1.1227e-12	-11.9497	MRPL52, RNPEP, RPS8, RPS13, TRNAU1AP, ABTB1, NCBP2, NIBAN1, CDK4, RPL13A, RPS16, GDAP1, EEF1G, EIF3H, CLIC2, APOE, UHMK1, PCSK5, RPS15, KARS1, CNDP2, RPL35, MRPL11, SRP9, RPSA, EIF4EBP1, UBA52, PPA1, TNRC6C, RPL19, RPS14, RPL21, RPS11, SCG5, DNPEP, RPS3, HM13, MRPL35, DAP3, RPL23A, RPL27, MRPL40, CPEB1, ECE2, MRPL49, CTNS, CPEB2, RPL17, RPL36, RPL39, RPL30, RPS2, RPL18, RPL38, RPS19, MRPS6, CDKAL…	1966	818	16130	1.70509	1.56966e-10	1.4844e-10
GOTERM_BP	GO:0016310~phosphorylation	376	2.58524e-12	-11.5875	F2R, LRRC4, SHC3, NUP62, PTPRJ, PI4KA, FGF13, KRAS, IKBKE, LCP2, SMAD5, FGFR2, GSK3B, CDK4, ADRA1B, CDK15, NEK6, STK36, CXCR4, PRMT5, CDC6, MAPK8, APOE, TGFBR1, UHMK1, NMRK2, DUSP22, CISH, MAPKAPK3, GRIN2C, MDFI, WWC1, AMBRA1, LRRTM4, PPARGC1B, NF1, KSR2, BTK, FN3KRP, PKLR, PIP5K1C, LRRC4B, CDC42EP5, CHP1, DNAJA1, CHEK2, AP006333.1, RPTOR, RPS3, PSMA2, DGKH, STK40, NDUFA10, CDK6, RASGRF2, HSPA5, …	1966	2229	16130	1.38398	3.51933e-10	3.32816e-10
GOTERM_BP	GO:0051345~positive regulation of hydrolase activity	184	3.09699e-12	-11.5091	F2R, SHC3, TBC1D9, ANP32B, RALGAPA1, PKP4, PLEK, GARNL3, FGFR2, RUNDC1, GSK3B, ARHGEF9, ARHGEF11, DENND5B, DENND1A, ADAP2, DOCK3, DNAJC1, FOXL2, IQSEC2, UHRF1, MCF2L, DOCK4, ARHGAP39, MAPK8, VEGFA, GRIN2C, RALGPS1, FGD6, BCL2L10, PRELID1, SPTBN1, PPARGC1B, LAMTOR5, NF1, HSPE1, AGAP1, OBSCN, PRKCZ, MMP14, NET1, FGD4, IQSEC3, GFRA2, IQSEC1, RASGRF1, ARHGAP22, KALRN, ARHGAP5, STXBP5, CDC42EP5, CYTH4…	1966	917	16130	1.64626	4.10788e-10	3.88474e-10
GOTERM_BP	GO:0034765~regulation of ion transmembrane transport	98	3.21688e-12	-11.4926	F2R, CACNA2D1, MAPK8IP2, MYO5A, CACNA2D2, KCNJ12, MMP9, CACNA1I, SCN2B, SCN10A, CACNA1F, EHD3, AMIGO1, CLIC2, CACNA1A, CACNA1E, OPRM1, JPH3, CORO1A, KCNJ10, RASGRF1, NLGN2, LYN, KCNB2, CHP1, KCNH7, HCN1, CRHR1, KCNA2, GLRX, KCNJ9, KCNE4, SHANK3, CYBB, TESC, CACNA1C, PTPN3, HTT, CACNA2D4, DAPK1, KCNQ2, CACNA2D3, TRPC1, KIF5B, SLC8A1, CYBA, KCNC1, DLG4, PTPN6, TMEM37, DMD, SLMAP, BAX, CACNB1, ATP1B…	1966	392	16130	2.05112	4.16023e-10	3.93425e-10
GOTERM_BP	GO:0044267~cellular protein metabolic process	730	5.76736e-12	-11.239	F2R, NUP62, IKBKE, ST6GALNAC6, ABTB1, LCP2, SMAD5, FGFR2, NCBP2, GSK3B, UBXN2A, CDK4, ADRA1B, DNAJC1, FOXL2, USP14, PRMT5, DUSP11, CDC6, EIF3H, CISH, DUSP22, MAPKAPK3, PCSK5, GRIN2C, MDFI, ZDHHC17, NUP37, BCL2L10, PRELID1, WWC1, LAMTOR5, NF1, RIOX1, MMP14, KSR2, RPSA, NSD3, BTK, TNRC6C, RPL19, CLPP, RPL21, DNAJA1, CHEK2, AP006333.1, DPY30, AAAS, HERC4, ACTL6A, MRPL40, CPEB1, USP20, CDK6, RASGRF2,…	1966	4900	16130	1.2223	7.27672e-10	6.88144e-10
GOTERM_BP	GO:1902531~regulation of intracellular signal transduction	299	1.72289e-11	-10.7637	F2R, RFC4, EXO1, LRRC4, NUP62, PTPRJ, KRAS, IKBKE, RALGAPA1, PLEK, FGFR2, GARNL3, FBXL2, ARHGEF9, ADRA1B, DENND1A, NEK6, CXCR4, SHOC2, IQSEC2, PRMT5, ARHGAP39, CLIC2, APOE, TGFBR1, DUSP22, CISH, MAPKAPK3, FGD6, MDFI, ZDHHC17, BCL2L10, WWC1, LRRTM4, NF1, LAMTOR5, SCAI, NET1, F2RL2, FGD4, SEZ6L2, IQSEC1, IQSEC3, ARHGAP22, PIP5K1C, LRRC4B, OTUD7A, CHP1, DNAJA1, CHEK2, AP006333.1, RPTOR, RPS3, STK40,…	1966	1714	16130	1.43124	2.12202e-09	2.00675e-09
GOTERM_BP	GO:0034762~regulation of transmembrane transport	98	2.8208e-11	-10.5496	F2R, CACNA2D1, MAPK8IP2, MYO5A, CACNA2D2, KCNJ12, MMP9, CACNA1I, SCN2B, SCN10A, CACNA1F, EHD3, AMIGO1, CLIC2, CACNA1A, CACNA1E, OPRM1, JPH3, CORO1A, KCNJ10, RASGRF1, NLGN2, LYN, KCNB2, CHP1, KCNH7, HCN1, CRHR1, KCNA2, GLRX, KCNJ9, KCNE4, SHANK3, CYBB, TESC, CACNA1C, PTPN3, HTT, CACNA2D4, DAPK1, KCNQ2, CACNA2D3, TRPC1, KIF5B, SLC8A1, CYBA, KCNC1, DLG4, PTPN6, TMEM37, DMD, SLMAP, BAX, CACNB1, ATP1B…	1966	406	16130	1.98039	3.39349e-09	3.20915e-09
GOTERM_BP	GO:0019058~viral life cycle	106	3.90232e-11	-10.4087	NUP62, ISG15, HYAL2, PI4KA, RPS8, RPS13, TRIM62, RPL13A, POLR2H, NUP35, CXCR4, RPS16, NPC1, MVB12A, CTSB, APOE, PCSK5, NUP37, RPS15, LAMTOR5, RPL35, THOC6, RPSA, UBA52, RPL19, RPS14, RPL21, RPS11, AAAS, RPS3, SUPT4H1, RPL23A, RPL27, MRC1, PPIH, RPL17, POLR2L, RPL36, RPL39, PTX3, RPL30, RPS2, RPL18, RPL38, RPS19, RPL14, ADARB1, PFN1, PC, RPS5, RPL4, SNX3, RPL10A, RPL5, RPLP0, RPL10, EIF3D, CD4, CH…	1966	455	16130	1.91137	4.58788e-09	4.33867e-09
GOTERM_BP	GO:0043087~regulation of GTPase activity	144	6.05395e-11	-10.218	SHC3, TBC1D9, RALGAPA1, PKP4, GARNL3, FGFR2, RUNDC1, GSK3B, ARHGEF9, ARHGEF11, DENND5B, DENND1A, SPRY1, ADAP2, DOCK3, TMED2, IQSEC2, PLXNA3, MCF2L, DOCK4, ARHGAP39, EFNA5, GRIN2C, RALGPS1, FGD6, SPTBN1, LAMTOR5, NF1, AGAP1, OBSCN, NET1, FGD4, IQSEC3, GFRA2, IQSEC1, RHOH, RASGRF1, ARHGAP22, KALRN, ARHGAP5, STXBP5, CDC42EP5, CYTH4, RGL1, RASGRF2, SRGAP3, PLEKHG5, RASGRP3, SIPA1L1, CPEB2, RAPGEF5, C…	1966	691	16130	1.70976	6.95935e-09	6.58132e-09
GOTERM_BP	GO:0045666~positive regulation of neuron differentiation	80	7.4436e-11	-10.1282	UNC13A, SYT3, PPP1R9A, RAPGEF2, VWC2L, GLI2, GSK3B, DMD, BAIAP2, NFE2L2, APBB1, LRP8, BMP2, SETX, ENC1, CAMK1, CAMK2B, CPNE1, EFNA5, AMIGO1, VEGFA, TRPC5, APOE, TIAM1, SF3A2, MEGF8, SOX11, NEDD4L, ZEB1, DAB1, CDKL5, PRKN, KALRN, CPNE9, LYN, CNTN1, CAMK1D, BRINP1, GOLGA4, CRTC1, BCL6, SEMA5A, NEURL1, NTRK3, NGFR, FN1, MAGI2, BMPR2, NCOA1, SHANK3, PTK2B, RIMS1, SYT2, MAPT, NME1, EZH2, CPNE5, MMD, N…	1966	310	16130	2.11728	8.30817e-09	7.85687e-09
GOTERM_BP	GO:0051056~regulation of small GTPase mediated signal transduction	78	7.5485e-11	-10.1221	CYTH1, F2R, BCR, NUP62, RAP1GAP, KRAS, RALGAPA1, GARNL3, STMN3, RHOF, RHOBTB2, ARHGEF9, ARHGEF11, ARHGAP11A, DENND1A, SPRY1, ITSN1, ARHGEF7, SHOC2, IQSEC2, MCF2L, ARFGEF2, ARHGAP39, GPR18, APOE, TIAM1, RALGPS1, FGD6, PDGFRB, ARHGAP44, NF1, ABR, SCAI, OBSCN, NET1, FGD4, F2RL2, IQSEC3, IQSEC1, FAM13A, RHOH, GPR65, RASGRF1, ARHGAP22, ARHGAP5, KALRN, TRIP10, CYTH4, MCF2L2, GPR4, BCL6, RASGRF2, SRGAP3…	1966	299	16130	2.1403	8.30817e-09	7.85687e-09
GOTERM_BP	GO:0010976~positive regulation of neuron projection development	65	7.73394e-11	-10.1116	UNC13A, SYT3, PPP1R9A, RAPGEF2, GSK3B, DMD, BAIAP2, NFE2L2, APBB1, LRP8, SETX, ENC1, CAMK1, CAMK2B, EFNA5, AMIGO1, VEGFA, TRPC5, APOE, TIAM1, SF3A2, MEGF8, NEDD4L, CDKL5, PRKN, KALRN, CPNE9, LYN, CNTN1, CAMK1D, GOLGA4, CRTC1, SEMA5A, NEURL1, NTRK3, NGFR, FN1, MAGI2, BMPR2, SHANK3, PTK2B, RIMS1, SYT2, MAPT, NME1, EZH2, CPNE5, NDRG4, DAB2IP, CPEB3, NEGR1, ZMYND8, CUX2, MTOR, PLXNB3, L1CAM, SNX3, GP…	1966	229	16130	2.32878	8.33493e-09	7.88217e-09
GOTERM_BP	GO:0032990~cell part morphogenesis	163	9.94788e-11	-10.0023	SPEF2, SYT3, TMEM107, MYH14, RAPH1, FGF13, KRAS, SLITRK4, KIRREL3, FGFR2, SEMA6B, MAPK8IP2, GSK3B, TMEM231, RTN4, BAIAP2, LRP8, SLITRK5, STK36, PLXNA3, UNC5C, CPNE1, EHD3, EFNA5, AMIGO1, VEGFA, APOE, TSKU, MACIR, CACNA1A, BCL11B, SPTBN1, UNC5A, PID1, PLPPR4, PRKCZ, WEE1, SEPTIN2, KALRN, CPNE9, ADCY1, GOLGA4, ABCC4, AP006333.1, SEMA5A, NEURL1, NGFR, SIPA1L1, IFRD1, TBC1D30, SHANK3, SYT2, RAB8A, DP…	1966	817	16130	1.63688	1.05021e-08	9.93164e-09
GOTERM_BP	GO:0030036~actin cytoskeleton organization	121	1.07351e-10	-9.96919	CAPG, EHD2, MYH14, ARPC5, KRAS, PLEK, ANXA1, ARHGEF11, TRPV4, BAIAP2, ARPC1B, IQSEC2, RAP2A, TGFBR1, WAS, ARPC3, FGD6, PARVG, SPTBN1, XIRP2, PPARGC1B, MSRB1, ABI2, NF1, OBSCN, PRKCZ, FGD4, IQSEC3, IQSEC1, CORO1A, PIP5K1C, CDC42EP5, ADD1, CATIP, SEMA5A, CNN3, SIPA1L1, MRTFA, TWF1, CNN2, CDC42EP4, NISCH, SHANK3, NCKAP1, HCK, ACTG1, FMNL1, PFN1, RAC2, CDC42BPB, NCK1, WASF1, FHL3, VASP, ABL2, INPPL1,…	1966	553	16130	1.79519	1.11066e-08	1.05033e-08
GOTERM_BP	GO:0048667~cell morphogenesis involved in neuron differentiation	111	1.69085e-10	-9.77189	RAPH1, FGF13, KRAS, SLITRK4, FGFR2, SEMA6B, MAPK8IP2, GSK3B, RTN4, BAIAP2, LRP8, SLITRK5, PLXNA3, UNC5C, EFNA5, AMIGO1, VEGFA, APOE, TSKU, CACNA1A, BCL11B, SPTBN1, UNC5A, PLPPR4, KALRN, ADCY1, GOLGA4, SEMA5A, NGFR, SIPA1L1, IFRD1, SHANK3, RAB8A, DPYSL2, NUMBL, NEO1, CUX2, RAB3A, APP, PLXNB3, L1CAM, CDK5R1, KIF5B, RGMA, SRCIN1, LGI1, VASP, RERE, PPP1R9A, ULK1, DLG4, RAPGEF2, SPTAN1, GLI2, PTEN, ST…	1966	496	16130	1.83608	1.71505e-08	1.62189e-08
GOTERM_BP	GO:0051962~positive regulation of nervous system development	103	1.92761e-10	-9.71498	SYT3, SLITRK4, GSK3B, CLCF1, BAIAP2, LRP8, SLITRK5, CAMK1, CXCR4, PRMT5, CPNE1, EFNA5, AMIGO1, VEGFA, APOE, SF3A2, OPRM1, ADGRL1, SYNJ1, ZEB1, NLGN2, LRRC4B, KALRN, CPNE9, LYN, BRINP1, GOLGA4, AP006333.1, SEMA5A, NEURL1, NGFR, MYC, NCOA1, SHANK3, HIF1A, SYT2, EZH2, NME1, CPNE5, NUMBL, NEGR1, ZMYND8, CUX2, PLXNB3, L1CAM, SNX3, GPRC5B, SPEN, NCK1, CLSTN1, RGMA, CBLN2, ABL2, IQGAP1, UNC13A, PPP1R9A,…	1966	449	16130	1.8821	1.9176e-08	1.81344e-08
GOTERM_BP	GO:0048858~cell projection morphogenesis	158	3.26056e-10	-9.48671	SPEF2, SYT3, TMEM107, RAPH1, FGF13, KRAS, SLITRK4, KIRREL3, FGFR2, SEMA6B, MAPK8IP2, GSK3B, TMEM231, RTN4, BAIAP2, LRP8, SLITRK5, STK36, PLXNA3, UNC5C, CPNE1, EHD3, EFNA5, AMIGO1, VEGFA, APOE, TSKU, MACIR, CACNA1A, BCL11B, SPTBN1, UNC5A, PLPPR4, PRKCZ, WEE1, SEPTIN2, KALRN, CPNE9, ADCY1, GOLGA4, ABCC4, AP006333.1, SEMA5A, NEURL1, NGFR, SIPA1L1, IFRD1, TBC1D30, SHANK3, SYT2, RAB8A, DPYSL2, SEPTIN9…	1966	797	16130	1.62648	3.18243e-08	3.00956e-08
GOTERM_BP	GO:0050769~positive regulation of neurogenesis	91	6.54033e-10	-9.1844	UNC13A, SYT3, PPP1R9A, RAPGEF2, VWC2L, GLI2, ZNF335, GSK3B, CLCF1, DMD, BAIAP2, NFE2L2, APBB1, LRP8, BMP2, SETX, ENC1, CAMK1, CXCR4, CAMK2B, PRMT5, CPNE1, EFNA5, AMIGO1, VEGFA, TRPC5, APOE, TIAM1, SF3A2, MEGF8, OPRM1, SOX11, NEDD4L, SYNJ1, ZEB1, DAB1, CDKL5, PRKN, KALRN, CPNE9, LYN, CNTN1, CAMK1D, BRINP1, GOLGA4, CRTC1, BCL6, SEMA5A, NEURL1, NTRK3, BIN1, NGFR, FN1, MAGI2, MYC, BMPR2, NCOA1, SHANK…	1966	387	16130	1.92922	6.26539e-08	5.92505e-08
GOTERM_BP	GO:0033365~protein localization to organelle	172	1.10923e-09	-8.95498	GTSE1, F2R, TMEM107, NUP62, HYAL2, RPS8, RPS13, SULF2, PINX1, ZFYVE9, LZTS2, GSK3B, VTI1A, MIS12, RPL13A, NUP35, STING1, RPS16, RAB11FIP3, GDAP1, FBXW7, KPNA6, DDIT3, MAPK8, VEGFA, SYNE1, TFDP1, TGFBR1, MDFI, SPTBN1, PACS1, RPS15, SSR3, LAMTOR5, NF1, RPL35, GPR26, OBSCN, TRAM2, SRP9, RPSA, TOMM20, PPM1A, UBA52, RPL19, TIMM9, SYNE2, CHP1, RPS14, RPL21, RPS11, DNAJA1, GOLGA4, RPS3, ACTL6A, SEMA5A, …	1966	902	16130	1.56449	1.04328e-07	9.86611e-08
GOTERM_BP	GO:0000902~cell morphogenesis	221	1.93473e-09	-8.71338	SPEF2, SYT3, TMEM107, MYH14, RAPH1, FGF13, KRAS, FGFR2, GSK3B, TMEM231, PALMD, SLITRK5, STK36, EHD3, APOE, TGFBR1, BCL11B, FGD6, UNC5A, NET1, FGD4, CORO1A, SEPTIN2, CDC42EP5, ADD1, AP006333.1, SEMA5A, CDC42EP4, TBC1D30, SHANK3, SYT2, DPYSL2, HCK, SEPTIN9, STRIP2, EZH2, CPNE5, NUMBL, CUX2, HTT, APP, L1CAM, RAB23, CIB1, TBC1D24, FGR, SRCIN1, VASP, GNA13, RREB1, IQGAP1, DACT3, PPP1R9A, FRY, PTPN6, Z…	1966	1240	16130	1.46225	1.7872e-07	1.69012e-07
GOTERM_BP	GO:0019220~regulation of phosphate metabolic process	274	2.025e-09	-8.69357	F2R, LRRC4, NUP62, PTPRJ, FGF13, KRAS, GNAI3, PLEK, LCP2, FGFR2, GSK3B, CDK4, ADRA1B, CXCR4, PRMT5, VIP, CDC6, APOE, TGFBR1, DUSP22, CISH, MAPKAPK3, MDFI, WWC1, AMBRA1, LRRTM4, PPARGC1B, NF1, LRRC4B, CHP1, DNAJA1, CHEK2, AP006333.1, CRHR1, RPTOR, RPS3, STK40, HSPA5, SIRT3, TWF1, MYC, DDR2, EZH2, ELFN2, MAP4K5, CNST, ADARB1, ADRB1, HIPK2, RAC2, HTT, VEGFB, APP, GPRC5B, NCK1, CCN1, CIB1, FGR, SRCIN…	1966	1610	16130	1.39629	1.82945e-07	1.73007e-07
GOTERM_BP	GO:0044265~cellular macromolecule catabolic process	182	2.05119e-09	-8.68799	GTSE1, UBE2C, ISG15, ANXA2, RPS8, RPS13, ABTB1, PSMB4, NCBP2, GSK3B, FBXL2, UBXN2A, CTSA, RPL13A, RNF181, XRN2, USP14, FOXL2, RPS16, UHRF1, FBXW7, MVB12A, CTSB, HECW1, DDIT3, APOE, UHMK1, SDF2, USP43, LSM3, RPS15, KLHL11, RPL35, RPSA, UBA52, TNRC6C, ATP13A2, OTUD7A, RPL19, MAD2L1, CLPP, RPS14, KCTD5, RPL21, RPS11, HMGB2, CHEK2, HERC4, RPS3, PSMA2, RPL23A, RPL27, USP20, HSPA5, PSMB10, RPL17, CLOCK…	1966	976	16130	1.52993	1.82945e-07	1.73007e-07
GOTERM_BP	GO:0034220~ion transmembrane transport	180	2.11181e-09	-8.67534	F2R, SLC17A6, CACNA2D1, MAPK8IP2, CHRNA2, MYO5A, ARHGEF9, CACNA2D2, TRPV4, DENND5B, KCNK3, GABRD, KCNJ12, MMP9, PKD1L2, NCS1, CHRNB3, TMEM63C, CACNA1I, CALHM6, SCN2B, SCN10A, AQP7, CACNA1F, EHD3, GABRA4, DDIT3, AMIGO1, CLIC2, CACNA1A, GRIN2C, SLC8A2, TMCO1, CACNA1E, OPRM1, CNNM4, JPH3, AQP3, CORO1A, KCNJ10, RASGRF1, UBA52, NLGN2, ATP13A2, ADAMTS8, LYN, SLC23A2, KCNB2, CHP1, KCNH7, HCN1, ABCC4, CR…	1966	963	16130	1.53355	1.85159e-07	1.75101e-07
GOTERM_BP	GO:0010647~positive regulation of cell communication	266	2.17133e-09	-8.66327	F2R, NUP62, PTPRJ, KRAS, IKBKE, FGFR2, GSK3B, ADRA1B, NEK6, STK36, FOXL2, CXCR4, SHOC2, IQSEC2, PRMT5, MAPK8, TGFBR1, DUSP22, MAPKAPK3, SH2B1, MDFI, ZDHHC17, WWC1, NF1, LAMTOR5, F2RL2, CREBRF, SNAP47, RPTOR, RPS3, PSMA2, SEMA5A, PLEKHG5, AAK1, STX1B, SIRT3, SHANK3, G0S2, SHD, EZH2, MAP4K5, ADRB1, HIPK2, CUX2, HTT, IGSF9B, VEGFB, FADD, GSDME, GPRC5B, NCK1, VSNL1, CCN1, PRRX1, SERP1, APAF1, CIB1, T…	1966	1555	16130	1.40347	1.87205e-07	1.77036e-07
GOTERM_BP	GO:0048588~developmental cell growth	54	2.31625e-09	-8.63522	UNC13A, SYT3, ULK1, RAPH1, FGF13, SEMA6B, GSK3B, RTN4, ALCAM, FOXL2, SEMA4G, PLXNA3, CPNE1, EFNA5, VEGFA, AKAP6, TRPC5, SEMA3F, TIAM1, PLXNA2, MEGF8, SORBS2, NEDD4L, PRKCZ, CDKL5, SLIT1, PRKN, CPNE9, GOLGA4, AP006333.1, SEMA5A, HAMP, CYFIP1, NTRK3, FN1, IFRD1, SEMA4F, MAP2K4, BMPR2, RIMS1, SYT2, KMT2D, MAPT, CPNE5, MTOR, GSK3A, APP, L1CAM, CDK5R1, PLXNA1, RGMA, TGFBR2, RND2, IQGAP1	1966	188	16130	2.3566	1.96425e-07	1.85755e-07
GOTERM_BP	GO:0010720~positive regulation of cell development	105	3.00764e-09	-8.52177	SYT3, GSK3B, CLCF1, BAIAP2, LRP8, CAMK1, CXCR4, PRMT5, CPNE1, EFNA5, AMIGO1, VEGFA, APOE, TGFBR1, SF3A2, OPRM1, NET1, SYNJ1, ZEB1, KALRN, CPNE9, LYN, BRINP1, GOLGA4, SEMA5A, NEURL1, NGFR, MYC, NCOA1, SHANK3, HIF1A, SYT2, EZH2, NME1, CPNE5, NUMBL, NEGR1, ZMYND8, CUX2, PLXNB3, L1CAM, SNX3, GPRC5B, SPEN, NCK1, CIB1, RGMA, RREB1, ABL2, IQGAP1, UNC13A, PPP1R9A, RAPGEF2, VWC2L, SMAD3, GLI2, ZNF335, DMD…	1966	483	16130	1.78358	2.50944e-07	2.37313e-07
GOTERM_BP	GO:0043269~regulation of ion transport	116	4.11902e-09	-8.38521	F2R, ACSL4, CACNA2D1, MAPK8IP2, MYO5A, CACNA2D2, KCNJ12, MMP9, CACNA1I, SCN2B, SCN10A, CACNA1F, EHD3, AMIGO1, CLIC2, CACNA1A, CACNA1E, OPRM1, SLC6A1, JPH3, CORO1A, KCNJ10, RASGRF1, SEPTIN2, NLGN2, LYN, KCNB2, CHP1, KCNH7, HCN1, CRHR1, KCNA2, GLRX, KCNJ9, LGALS3, KCNE4, SHANK3, CYBB, DPYSL2, TESC, CACNA1C, PTPN3, PER2, HTT, CACNA2D4, DAPK1, KCNQ2, CACNA2D3, GNAO1, TRPC1, KIF5B, CRY2, SLC8A1, ATP1A…	1966	554	16130	1.7179	3.38217e-07	3.19845e-07
GOTERM_BP	GO:0022604~regulation of cell morphogenesis	118	4.80961e-09	-8.31789	SYT3, MYH14, KIF13B, FGF13, CAMSAP1, SEMA6B, ANXA1, GSK3B, TRIM62, ODF2, RTN4, BAIAP2, PALMD, LRP8, ITGB2, PLXNA3, RAP2A, EFNA5, AMIGO1, VEGFA, APOE, TGFBR1, CACNA1A, FGD6, NET1, FGD4, CORO1A, KALRN, CPNE9, CDC42EP5, GOLGA4, SEMA5A, NGFR, SIPA1L1, IFRD1, CDC42EP4, TBC1D30, SHANK3, LDLRAD4, SYT2, DPYSL2, HCK, SEPTIN9, FBLIM1, STRIP2, EZH2, CPNE5, FMNL1, CUX2, HTT, PLXNB3, L1CAM, CDK5R1, CIB1, TBC1…	1966	568	16130	1.70445	3.88752e-07	3.67635e-07
GOTERM_BP	GO:0060627~regulation of vesicle-mediated transport	98	8.63986e-09	-8.06349	SYT3, TBC1D9, EHD2, STXBP2, ANXA2, ANXA1, RUNDC1, NCS1, CACNA1I, MVB12A, SMPD3, VEGFA, HMOX1, CACNA1A, APOC1, PCLO, CPLX2, RAB4B, SYNJ1, SYT14, PIK3CB, CORO1A, ATP13A2, NAPB, LYN, STXBP5, RAP1B, SELE, AAK1, STX1B, CNN2, LGALS3, TBC1D30, PTX3, SYT2, RPH3A, HCK, GAB2, NAPA, DNM1, RAC2, RAB3A, SNX3, VSNL1, KIF5B, FGR, DOC2B, HMGB1, LRPAP1, CYBA, ABL2, UVRAG, BCR, DLG4, SGIP1, PTEN, STXBP1, RIMS3, SN…	1966	449	16130	1.79073	6.876e-07	6.50249e-07
GOTERM_BP	GO:0010942~positive regulation of cell death	123	1.02394e-08	-7.98973	F2R, HYAL2, ANP32B, ANXA1, GSK3B, ARHGEF9, MAP3K9, ARHGEF11, CDK4, ADM, MMP9, FOXL2, FBXW7, UNC5C, MCF2L, DDIT3, MAPK8, APOE, TFDP1, TGFBR1, HMOX1, NUPR1, BCL2L10, PRELID1, NF1, HSPE1, OBSCN, NET1, FGD4, UBA52, KALRN, LYN, CHEK2, DNAJA1, RPS3, PDCD2, NEURL1, RASGRF2, TLE5, PLEKHG5, NGFR, MYC, NCOA1, G0S2, MCF2, RPS6KA2, DAP, SOX7, DAPK1, FADD, CDK5R1, GSDME, APC, NCK1, CCN1, APAF1, IGFBP3, HMGB1,…	1966	607	16130	1.66252	8.02549e-07	7.58954e-07
GOTERM_BP	GO:0007611~learning or memory	58	1.71544e-08	-7.76563	SHC3, DLG4, FGF13, KRAS, MAPK8IP2, NPAS4, PTEN, GRIN2A, CAMK4, SLC8A2, PPP1R9B, SLC6A1, NF1, JPH3, SLC24A2, CNTNAP2, PRKCZ, SYNJ1, HMGCR, RASGRF1, PRKN, KALRN, NTSR1, BRINP1, GPR52, ADCY1, AAAS, CRTC1, THRA, SLC17A7, CTNS, CEBPB, KCNAB1, PRKAR2B, GRIN2B, SHANK3, HIF1A, GRM5, PLCB1, DRD1, PIAS1, PLK2, NDRG4, CPEB3, CUX2, MTOR, HTT, SORCS3, PRKAR1B, APP, NEUROD2, BRAF, NETO1, MECP2, GABRA5, SLC8A3,…	1966	220	16130	2.163	1.32447e-06	1.25253e-06
GOTERM_BP	GO:0023014~signal transduction by protein phosphorylation	163	2.02956e-08	-7.6926	F2R, SHC3, NUP62, HYAL2, PTPRJ, FGF13, KRAS, PSMB4, FGFR2, MAPK8IP2, MAP3K9, TRPV4, ADRA1B, SPRY1, CXCR4, RRAS, FBXW7, RAP2A, GPR183, PRMT5, KLF4, MAPK8, VEGFA, APOE, TGFBR1, DUSP22, MAPKAPK3, GRIN2C, MDFI, SPTBN1, WWC1, OPRM1, NF1, PRKCZ, GFRA2, PIK3CB, RASGRF1, UBA52, LYN, CDC42EP5, DNAJA1, RAP1B, RPS3, PSMA2, MAPK10, RASGRF2, NGFR, GPNMB, PSMB10, PAK6, SIRT3, RASGRP3, PRKCA, MYC, SHANK3, EZH2,…	1966	877	16130	1.52489	1.54396e-06	1.46009e-06
GOTERM_BP	GO:0016477~cell migration	208	2.0843e-08	-7.68104	F2R, PTPRJ, FGF13, ARPC5, KRAS, EGR3, GSK3B, CXCR4, COL1A2, PSTPIP1, APOE, TGFBR1, WWC1, NF1, SCAI, MMP14, NET1, CSF3R, CORO1A, PIP5K1C, EPX, HMGB2, SELE, SEMA5A, HSPA5, PLEKHG5, EFHC1, MYC, PADI2, LGALS3, NISCH, TUBB2B, EDN2, HCK, DDR2, RPS19, STRIP2, ANGPT2, PLVAP, ADARB1, PFN1, RAC2, CMKLR1, VEGFB, FADD, L1CAM, MMP1, NCK1, CCN1, CIB1, TERT, FGR, IGFBP3, HMGB1, RREB1, IQGAP1, HSPB1, ROCK2, BCR,…	1966	1184	16130	1.44133	1.56262e-06	1.47774e-06
GOTERM_BP	GO:0000904~cell morphogenesis involved in differentiation	144	2.43195e-08	-7.61404	KIF13B, RAPH1, FGF13, KRAS, SLITRK4, FGFR2, SEMA6B, MAPK8IP2, GSK3B, TRIM62, RTN4, BAIAP2, LRP8, SLITRK5, PLXNA3, RAP2A, UNC5C, EFNA5, AMIGO1, VEGFA, APOE, TGFBR1, TSKU, CACNA1A, BCL11B, SPTBN1, UNC5A, PLPPR4, NET1, KALRN, PLOD3, ADCY1, GOLGA4, SEMA5A, NGFR, SIPA1L1, IFRD1, SHANK3, LDLRAD4, HIF1A, RAB8A, DPYSL2, EZH2, NUMBL, NEO1, CUX2, FERMT3, RAB3A, APP, PLXNB3, L1CAM, CDK5R1, CIB1, KIF5B, RGMA…	1966	753	16130	1.56898	1.79721e-06	1.69959e-06
GOTERM_BP	GO:1904062~regulation of cation transmembrane transport	56	3.44887e-08	-7.46232	F2R, PTPN6, CACNA2D1, MYO5A, DMD, SLMAP, MMP9, BAX, CACNB1, ATP1B1, SCN2B, EHD3, CLIC2, AMIGO1, NOS1, AKAP6, CAB39, KCNAB2, SRI, CACNA1D, JPH3, NEDD4L, NOS1AP, CORO1A, LYN, CHP1, NTSR1, CACNB2, CACNB3, CRHR1, PIK3CG, HAMP, CAV1, JPH1, GLRX, ANK3, KCNAB1, PTK2B, KCNIP4, FGF14, TESC, RANGRF, DRD1, CACNA1C, DPP6, PTPN3, HTT, THY1, PRKCE, FGF12, FLNA, TRPC1, KIF5B, SLC8A1, CYBA, KCNC1	1966	213	16130	2.15705	2.51282e-06	2.37632e-06
GOTERM_BP	GO:0007167~enzyme linked receptor protein signaling pathway	173	4.1728e-08	-7.37957	SHC3, NUP62, PTPRJ, LTBP1, ARPC5, KRAS, SULF2, LCP2, SMAD5, ZFYVE9, FGFR2, NCBP2, BAIAP2, SPRY1, POLR2H, MMP9, SHOC2, COL1A2, ARPC1B, FBXW7, EFNA5, MVB12A, VEGFA, TGFBR1, DUSP22, CISH, MAPKAPK3, ARPC3, SPTBN1, FST, PID1, PRKCZ, GFRA2, ZEB1, BTK, PIK3CB, PPM1A, EIF4EBP1, UBA52, KALRN, LYN, AP006333.1, NEURL1, PLEKHA1, HSPA5, NGFR, SIPA1L1, NCF2, ATP6V1E1, POLR2L, CRIM1, LDLRAD4, CYBB, NCKAP1, HIF1…	1966	954	16130	1.48781	2.99804e-06	2.83519e-06
GOTERM_BP	GO:0042255~ribosome assembly	25	4.41153e-08	-7.35541	RPL23A, NPM1, RPF1, RPL6, RPS10, C1QBP, RPL38, RPS19, NIP7, RPS5, RPS15, EIF6, MRPL11, RPSA, RPS28, RPL12, RPL24, RPS27L, RPL5, RRP7A, RPS14, RPS17, RPL10, RPL11, BMS1	1966	60	16130	3.41853	3.12614e-06	2.95633e-06
GOTERM_BP	GO:0098655~cation transmembrane transport	135	5.46483e-08	-7.26242	F2R, CACNA2D1, CHRNA2, MYO5A, CACNA2D2, TRPV4, DENND5B, KCNK3, KCNJ12, MMP9, PKD1L2, NCS1, CHRNB3, TMEM63C, CACNA1I, CALHM6, SCN2B, SCN10A, CACNA1F, EHD3, DDIT3, AMIGO1, CLIC2, CACNA1A, GRIN2C, SLC8A2, TMCO1, CACNA1E, OPRM1, CNNM4, JPH3, CORO1A, KCNJ10, ATP13A2, LYN, SLC23A2, KCNB2, CHP1, KCNH7, HCN1, CRHR1, RHBG, KCNA2, GLRX, KCNJ9, ATP6V1E1, MCOLN2, KCNE4, TRPM3, TESC, SLC30A7, TCIRG1, KCNN1, C…	1966	703	16130	1.57554	3.82021e-06	3.61269e-06
GOTERM_BP	GO:0030334~regulation of cell migration	132	6.38507e-08	-7.19483	GTSE1, F2R, HYAL2, PTPRJ, SEMA6B, ANXA1, RTN4, TRPV4, LDB2, MMP9, CXCR4, RRAS, PLXNA3, RAP2A, GPR183, UNC5C, DOCK4, GPR18, KLF4, VEGFA, APOE, TGFBR1, HMOX1, MACIR, NF1, SCAI, MMP14, CORO1A, LYN, SYNE2, SEMA5A, SRGAP3, HSPA5, GPNMB, PRKCA, CNN2, MYC, PADI2, LGALS3, NISCH, LDLRAD4, HIF1A, EDN2, DDR2, ANGPT2, PLCB1, PLVAP, ADARB1, ZMYND8, STAT5A, PFN1, RAC2, FERMT3, CMKLR1, PLXNB3, VEGFB, FADD, APC,…	1966	685	16130	1.58101	4.37074e-06	4.13332e-06
GOTERM_BP	GO:0023061~signal release	90	6.42135e-08	-7.19237	DNAJC5, STX11, UNC13A, SYT3, PPP1R9A, LIN7B, ANXA1, APLN, MYO5A, STXBP1, HADH, CACNA2D2, RIMS3, TRPV4, ADM, ARHGEF7, C1QTNF1, SLC25A5, OXCT1, FOXL2, RAB11FIP3, PTPRN2, VIP, EFNA5, SMPD3, GAD1, TIAM1, GLUD1, CACNA1A, SREBF1, CRY1, SRI, CACNA1D, CACNA1E, OPRM1, SYT16, NF1, SOX11, ADGRL1, DOC2A, SYNJ1, PCLO, CPLX2, HMGCR, SYT14, BTK, APBA1, NLGN2, NAPB, PIP5K1C, PRKN, LYN, SOX4, RAB11FIP2, RAP1B, SN…	1966	417	16130	1.77075	4.37074e-06	4.13332e-06
GOTERM_BP	GO:0098660~inorganic ion transmembrane transport	138	6.60488e-08	-7.18013	F2R, CACNA2D1, MYO5A, CACNA2D2, TRPV4, DENND5B, KCNK3, GABRD, KCNJ12, PKD1L2, NCS1, CACNA1I, SCN2B, SCN10A, CACNA1F, EHD3, GABRA4, DDIT3, AMIGO1, CLIC2, CACNA1A, SLC8A2, TMCO1, CACNA1E, OPRM1, CNNM4, JPH3, CORO1A, KCNJ10, ADAMTS8, LYN, SLC23A2, KCNB2, CHP1, KCNH7, HCN1, CRHR1, KCNA2, GLRX, SLC4A3, KCNJ9, ATP6V1E1, MCOLN2, KCNE4, TRPM3, TESC, SLC30A7, TCIRG1, KCNN1, CACNA1C, PTPN3, HTT, CACNA2D4, …	1966	725	16130	1.56168	4.43728e-06	4.19624e-06
GOTERM_BP	GO:0043068~positive regulation of programmed cell death	115	8.23018e-08	-7.08459	F2R, HYAL2, ANP32B, ANXA1, GSK3B, ARHGEF9, MAP3K9, ARHGEF11, CDK4, ADM, MMP9, FOXL2, FBXW7, UNC5C, MCF2L, DDIT3, MAPK8, TFDP1, TGFBR1, HMOX1, NUPR1, BCL2L10, PRELID1, NF1, HSPE1, OBSCN, NET1, FGD4, UBA52, KALRN, LYN, CHEK2, DNAJA1, RPS3, PDCD2, NEURL1, RASGRF2, TLE5, PLEKHG5, NGFR, MYC, NCOA1, G0S2, MCF2, RPS6KA2, DAP, SOX7, DAPK1, FADD, CDK5R1, GSDME, APC, NCK1, CCN1, APAF1, IGFBP3, HMGB1, WT1, …	1966	577	16130	1.63521	5.4583e-06	5.1618e-06
GOTERM_BP	GO:0043065~positive regulation of apoptotic process	114	9.40939e-08	-7.02644	F2R, HYAL2, ANP32B, ANXA1, GSK3B, ARHGEF9, MAP3K9, ARHGEF11, CDK4, ADM, MMP9, FOXL2, FBXW7, UNC5C, MCF2L, DDIT3, MAPK8, TFDP1, TGFBR1, HMOX1, NUPR1, BCL2L10, PRELID1, NF1, HSPE1, OBSCN, NET1, FGD4, UBA52, KALRN, LYN, CHEK2, DNAJA1, RPS3, PDCD2, NEURL1, RASGRF2, TLE5, PLEKHG5, NGFR, MYC, NCOA1, G0S2, MCF2, RPS6KA2, DAP, SOX7, DAPK1, FADD, CDK5R1, GSDME, APC, NCK1, CCN1, APAF1, IGFBP3, HMGB1, WT1, …	1966	572	16130	1.63516	6.16136e-06	5.82667e-06
GOTERM_BP	GO:0032940~secretion by cell	173	1.02202e-07	-6.99054	CANX, F2R, DNAJC5, STX11, SYT3, STXBP2, HYAL2, LCP2, PLEK, CD276, ANXA1, APLN, MYO5A, HADH, CACNA2D2, TRPV4, ADM, DNAJC1, FOXL2, NCS1, TNFSF13B, RAB11FIP3, CACNA1I, VIP, VAMP5, EFNA5, SMPD3, VEGFA, HMOX1, CACNA1A, PCSK5, SPTBN1, CACNA1E, OPRM1, NF1, ADGRL1, PRKCZ, PCLO, CPLX2, SYNJ1, SYT14, BTK, CORO1A, NLGN2, PIP5K1C, ATP13A2, NAPB, LYN, STXBP5, CHP1, ABCC4, RAP1B, SCG5, SNAP47, CRHR1, F13A1, KC…	1966	966	16130	1.46933	6.60861e-06	6.24963e-06
GOTERM_BP	GO:0000165~MAPK cascade	154	1.38537e-07	-6.85843	F2R, SHC3, NUP62, HYAL2, PTPRJ, FGF13, KRAS, PSMB4, FGFR2, MAPK8IP2, MAP3K9, TRPV4, ADRA1B, SPRY1, CXCR4, RRAS, FBXW7, RAP2A, GPR183, PRMT5, KLF4, MAPK8, VEGFA, APOE, TGFBR1, DUSP22, MAPKAPK3, GRIN2C, MDFI, SPTBN1, WWC1, OPRM1, NF1, PRKCZ, GFRA2, PIK3CB, RASGRF1, UBA52, LYN, CDC42EP5, DNAJA1, RAP1B, RPS3, PSMA2, MAPK10, RASGRF2, NGFR, GPNMB, PSMB10, SIRT3, RASGRP3, PRKCA, MYC, SHANK3, EZH2, PLCB1…	1966	841	16130	1.50237	8.84755e-06	8.36695e-06
GOTERM_BP	GO:0031399~regulation of protein modification process	271	1.58825e-07	-6.79908	F2R, LRRC4, NUP62, PTPRJ, FGF13, KRAS, LCP2, FGFR2, GSK3B, UBXN2A, CDK4, ADRA1B, PHF19, CXCR4, PRMT5, CDC6, MAPK8, APOE, TGFBR1, DUSP22, CISH, MAPKAPK3, MDFI, WWC1, LRRTM4, NF1, LRRC4B, MAD2L1, CHP1, DNAJA1, CHEK2, AP006333.1, RPTOR, RPS3, PSMA2, STK40, HSPA5, SIRT3, TWF1, MYC, ANAPC11, DDR2, EZH2, MAP4K5, ADARB1, HIPK2, RAC2, HTT, SPI1, VEGFB, APP, GPRC5B, NCK1, CCN1, CIB1, FGR, SRCIN1, NDFIP1, …	1966	1664	16130	1.33619	1.00195e-05	9.47526e-06
GOTERM_BP	GO:2000145~regulation of cell motility	138	1.66625e-07	-6.77826	GTSE1, F2R, PPP2R3A, HYAL2, PTPRJ, SEMA6B, ANXA1, RTN4, TRPV4, LDB2, MMP9, CXCR4, RRAS, PLXNA3, RAP2A, GPR183, UNC5C, DOCK4, GPR18, KLF4, VEGFA, APOE, TGFBR1, HMOX1, MACIR, WAS, NF1, SCAI, MMP14, CORO1A, LYN, SYNE2, SEMA5A, CDK6, SRGAP3, HSPA5, GPNMB, PRKCA, CNN2, MYC, PADI2, LGALS3, NISCH, LDLRAD4, HIF1A, EDN2, DDR2, ANGPT2, PLCB1, PLVAP, ADARB1, ZMYND8, STAT5A, PFN1, RAC2, FERMT3, CMKLR1, PLXNB…	1966	736	16130	1.53834	1.03849e-05	9.82082e-06
GOTERM_BP	GO:0099003~vesicle mediated transport in synapse	33	2.39499e-07	-6.6207	CANX, DNAJC5, STX11, UNC13A, SYT3, STX1B, STXBP1, RIMS3, DENND1A, ITSN1, RIMS1, SYT2, RPH3A, SH3GL2, NAPA, DNM1, CACNA1A, RAB3A, SYT16, BRAF, ADGRL1, DOC2A, PACSIN1, SYNJ1, SYT7, PCLO, CPLX2, SYT14, NAPB, PIP5K1C, DOC2B, RAP1B, SNAP47	1966	102	16130	2.65439	1.47492e-05	1.3948e-05
GOTERM_BP	GO:0045936~negative regulation of phosphate metabolic process	108	2.59947e-07	-6.58512	UBE2C, LRRC4, NUP62, HYAL2, PTPRJ, GNAI3, PLEK, NIBAN1, SPRY1, KLF4, APOE, DUSP22, CISH, LRRTM4, OPRM1, PID1, NF1, DLG2, LRRK1, PRKCZ, GFRA2, RHOH, LRRC4B, LYN, CHP1, DNAJA1, AP006333.1, CDA, DEPTOR, SIRT3, PRKCA, NIFK, MYC, LDLRAD4, TESC, SOCS1, ELFN2, CNST, ADARB1, GABBR2, MIDN, GRM2, SAMSN1, APC, NCK1, CIB1, EDNRA, ARPP19, C1QL4, SRCIN1, CRY2, PPP1R16B, IGFBP3, DDIT4, IQGAP1, HSPB1, ROCK2, PTP…	1966	544	16130	1.62883	1.56361e-05	1.47867e-05
GOTERM_BP	GO:0010563~negative regulation of phosphorus metabolic process	108	2.59947e-07	-6.58512	UBE2C, LRRC4, NUP62, HYAL2, PTPRJ, GNAI3, PLEK, NIBAN1, SPRY1, KLF4, APOE, DUSP22, CISH, LRRTM4, OPRM1, PID1, NF1, DLG2, LRRK1, PRKCZ, GFRA2, RHOH, LRRC4B, LYN, CHP1, DNAJA1, AP006333.1, CDA, DEPTOR, SIRT3, PRKCA, NIFK, MYC, LDLRAD4, TESC, SOCS1, ELFN2, CNST, ADARB1, GABBR2, MIDN, GRM2, SAMSN1, APC, NCK1, CIB1, EDNRA, ARPP19, C1QL4, SRCIN1, CRY2, PPP1R16B, IGFBP3, DDIT4, IQGAP1, HSPB1, ROCK2, PTP…	1966	544	16130	1.62883	1.56361e-05	1.47867e-05
GOTERM_BP	GO:0045937~positive regulation of phosphate metabolic process	183	2.78521e-07	-6.55514	F2R, FGF13, KRAS, ANXA2, LCP2, PLEK, FGFR2, MAPK8IP2, GSK3B, APLN, MAP3K9, NIBAN1, CKS1B, CLCF1, TRPV4, ADRA1B, ADM, LRP8, CAMK1, MMP9, CXCR4, CCNY, FBXW7, RAP2A, GPR183, VIP, CDC6, EFNA5, VEGFA, APOE, TGFBR1, DUSP22, MAPKAPK3, MDFI, AMBRA1, WWC1, OPRM1, PPARGC1B, PID1, NF1, LRRK1, PRKCZ, GFRA2, PIK3CB, UBA52, LYN, ADCY1, CHEK2, RAP1B, CRHR1, RPTOR, RPS3, MAPK10, NEURL1, HSPA5, NGFR, GPNMB, PRKCA…	1966	1049	16130	1.43129	1.62327e-05	1.53509e-05
GOTERM_BP	GO:0010562~positive regulation of phosphorus metabolic process	183	2.78521e-07	-6.55514	F2R, FGF13, KRAS, ANXA2, LCP2, PLEK, FGFR2, MAPK8IP2, GSK3B, APLN, MAP3K9, NIBAN1, CKS1B, CLCF1, TRPV4, ADRA1B, ADM, LRP8, CAMK1, MMP9, CXCR4, CCNY, FBXW7, RAP2A, GPR183, VIP, CDC6, EFNA5, VEGFA, APOE, TGFBR1, DUSP22, MAPKAPK3, MDFI, AMBRA1, WWC1, OPRM1, PPARGC1B, PID1, NF1, LRRK1, PRKCZ, GFRA2, PIK3CB, UBA52, LYN, ADCY1, CHEK2, RAP1B, CRHR1, RPTOR, RPS3, MAPK10, NEURL1, HSPA5, NGFR, GPNMB, PRKCA…	1966	1049	16130	1.43129	1.62327e-05	1.53509e-05
GOTERM_BP	GO:0046903~secretion	190	2.79279e-07	-6.55396	CANX, F2R, DNAJC5, STX11, SYT3, STXBP2, HYAL2, ACSL4, ANXA2, LCP2, PLEK, CD276, ANXA1, APLN, MYO5A, HADH, CACNA2D2, TRPV4, ADM, DNAJC1, FOXL2, NCS1, TNFSF13B, RAB11FIP3, CACNA1I, VIP, VAMP5, EFNA5, SMPD3, VEGFA, HMOX1, CACNA1A, PCSK5, SPTBN1, CACNA1E, OPRM1, SLC6A1, NF1, ADGRL1, PRKCZ, PCLO, CPLX2, SYNJ1, SYT14, BTK, CORO1A, NLGN2, PIP5K1C, ATP13A2, NAPB, LYN, STXBP5, CHP1, ABCC4, RAP1B, SCG5, SN…	1966	1098	16130	1.41972	1.62327e-05	1.53509e-05
GOTERM_BP	GO:0010769~regulation of cell morphogenesis involved in differentiation	75	3.2742e-07	-6.48489	PPP1R9A, RAPGEF2, KIF13B, FGF13, SMAD3, SEMA6B, TRIM62, GSK3B, PPP2CA, PTEN, RTN4, DAG1, BAIAP2, ARHGEF7, LRP8, BMP2, LINGO1, ID1, SEMA4G, PLXNA3, RAP2A, CAMK2B, EFNA5, AMIGO1, VEGFA, TGFBR1, TRPC5, APOE, SEMA3F, TIAM1, CACNA1A, PLXNA2, MEGF8, NET1, DAB1, CDKL5, SLIT1, KALRN, GOLGA4, SEMA5A, NTRK3, NGFR, SIPA1L1, NGEF, FN1, IFRD1, SEMA4F, BMPR2, LRRC4C, SHANK3, LDLRAD4, UNC13D, SSH1, DPYSL2, C1QB…	1966	339	16130	1.81515	1.88194e-05	1.77971e-05
GOTERM_BP	GO:0097479~synaptic vesicle localization	39	3.50842e-07	-6.45489	CANX, DNAJC5, STX11, UNC13A, SYT3, CNIH2, STX1B, MAGI2, STXBP1, PTEN, RIMS3, DENND1A, ITSN1, RIMS1, SYT2, DPYSL2, RPH3A, SH3GL2, FGF14, NAPA, DNM1, CACNA1A, RAB3A, SYT16, BRAF, ADGRL1, DOC2A, PACSIN1, SYNJ1, SYT7, PCLO, CPLX2, SYT14, NLGN2, NAPB, PIP5K1C, DOC2B, RAP1B, SNAP47	1966	134	16130	2.38787	1.9853e-05	1.87746e-05
GOTERM_BP	GO:0061564~axon development	92	3.53079e-07	-6.45213	ULK1, RAPH1, SPTAN1, FGF13, KRAS, SLITRK4, GLI2, FGFR2, SEMA6B, GSK3B, STXBP1, PTEN, RTN4, DAG1, ALCAM, BAIAP2, APBB1, LRTM2, SLITRK5, LINGO1, SEMA4G, PLXNA3, RPS6KA5, UNC5C, EFNA5, AMIGO1, VEGFA, TRPC5, APOE, TSKU, SEMA3F, TIAM1, BCL11B, PLXNA2, MEGF8, ETV4, SPTBN1, UNC5A, PLPPR4, SPTBN2, DAB1, CDKL5, SPTBN4, SLIT1, ADCY1, GOLGA4, RTN4RL1, SEMA5A, UNC5D, LRFN1, DSCAML1, CYFIP1, NTRK3, ANK3, NGFR…	1966	445	16130	1.69621	1.9853e-05	1.87746e-05
GOTERM_BP	GO:0071417~cellular response to organonitrogen compound	97	3.63874e-07	-6.43905	MYO5A, BAIAP2, COL1A2, CDC6, KLF4, CISH, GNG5, OPRM1, PID1, LAMTOR5, COL5A2, PRKCZ, GNB4, ZEB1, EIF4EBP1, PKLR, LYN, HCN1, ADCY1, RAP1B, CRHR1, RPTOR, NEURL1, CPEB1, NGFR, CPEB2, ATP6V1E1, MYC, CYBB, RAB8A, SOCS1, EZH2, TCIRG1, GNG12, STAT5A, APP, ATP6V1G1, RYR1, STXBP4, SLC8A1, PXN, RPLP0, CYBA, GABRB2, IGFBP1, WT1, RAPGEF2, NAMPT, PRKAR1A, ATP6V0E1, UBR1, STAT3, LAMTOR4, SHC1, SOCS2, ID1, AKAP6…	1966	477	16130	1.66842	2.024e-05	1.91405e-05
GOTERM_BP	GO:0008361~regulation of cell size	46	4.72953e-07	-6.32518	SEMA5A, FGF13, DEPTOR, NTRK3, PLEK, CLNS1A, SEMA6B, GSK3B, FN1, IFRD1, SEMA4F, PTEN, CDK4, TRPV4, AQP1, RTN4, BMPR2, SHANK3, LAMTOR4, DPYSL2, SEMA4G, PLXNA3, MAPT, AQP7, EFNA5, VEGFA, APOE, TRPC5, SEMA3F, RB1CC1, MSN, MTOR, PLXNA2, MEGF8, L1CAM, CDK5R1, LAMTOR5, PLXNA1, CDKL5, AQP3, RGMA, ATP2B2, RND2, GOLGA4, ADD1, RPTOR	1966	173	16130	2.18154	2.58128e-05	2.44106e-05
GOTERM_BP	GO:0034660~ncRNA metabolic process	111	4.74041e-07	-6.32418	RPS8, RPS13, NCBP2, RPL13A, POLR2H, XRN2, RPS16, PNO1, RPS15, KARS1, RPL35, RPSA, UBA52, PPA1, EMG1, PUS7, RPL19, RPS14, RPL21, RPS11, HSD17B10, RPS3, RPL23A, RPL27, RRP9, RPL17, NIFK, POLR2L, RPL36, EXOSC8, EXOSC6, RPL39, THG1L, RPL30, RPS2, RPL18, RPL38, RPS19, CDKAL1, RPL14, DDX52, NOP2, RPS5, RPL4, TRMT112, RPL10A, DIS3L2, POLR1E, RPL5, RPP40, RPLP0, RPL10, BMS1, URM1, RPL18A, TSR2, SMAD3, ER…	1966	570	16130	1.59771	2.58128e-05	2.44106e-05
GOTERM_BP	GO:1990138~neuron projection extension	40	5.01804e-07	-6.29947	SEMA5A, UNC13A, ULK1, SYT3, RAPH1, CYFIP1, NTRK3, SEMA6B, GSK3B, FN1, IFRD1, SEMA4F, ALCAM, RTN4, BMPR2, RIMS1, SYT2, SEMA4G, PLXNA3, CPNE1, MAPT, CPNE5, VEGFA, TRPC5, SEMA3F, TIAM1, PLXNA2, MEGF8, L1CAM, CDK5R1, PLXNA1, PRKCZ, NEDD4L, CDKL5, SLIT1, PRKN, CPNE9, GOLGA4, AP006333.1, IQGAP1	1966	141	16130	2.32751	2.70399e-05	2.55711e-05
GOTERM_BP	GO:0016358~dendrite development	49	5.07405e-07	-6.29465	PPP1R9A, DLG4, RAPGEF2, ACSL4, MAPK8IP2, PTEN, GRIP1, BAIAP2, SLITRK5, LRP8, CAMK1, ID1, RAP2A, CAMK2B, TRPC5, APOE, TIAM1, CACNA1A, PPP1R9B, DAB1, CDKL5, CAMK2A, KALRN, AP006333.1, CRTC1, NEURL1, MEF2A, SIPA1L1, NGEF, SHANK3, MCF2, EZH2, PLK2, DAB2IP, CPEB3, STRN, ZMYND8, CUX2, MTOR, APP, CDK5R1, MAP6, BTBD3, PACSIN1, MECP2, SRCIN1, MINK1, RERE, IQGAP1	1966	190	16130	2.11589	2.70598e-05	2.55899e-05
GOTERM_BP	GO:0050770~regulation of axonogenesis	45	5.14229e-07	-6.28884	SEMA5A, KIF13B, FGF13, NTRK3, NGFR, SEMA6B, SIPA1L1, GSK3B, FN1, IFRD1, SEMA4F, PTEN, RTN4, BMPR2, LRRC4C, SSH1, LINGO1, DPYSL2, SEMA4G, PLXNA3, MAPT, CHN1, EFNA5, AMIGO1, VEGFA, APOE, TRPC5, SEMA3F, TIAM1, CACNA1A, THY1, PLXNA2, MEGF8, PLXNB3, L1CAM, CDK5R1, BRAF, PLXNA1, DAB1, CDKL5, SLIT1, RGMA, GDI1, RND2, GOLGA4	1966	168	16130	2.19763	2.71439e-05	2.56695e-05
GOTERM_BP	GO:0007009~plasma membrane organization	64	5.48398e-07	-6.2609	ROCK2, EHD2, SYS1, MAP7, RAPGEF2, COL5A1, FGF13, ANXA2, RER1, TMEM150A, FNBP1L, SGIP1, MYO5A, STXBP1, PTEN, BAIAP2, SLMAP, TMED2, CXCR4, CLIP3, ATP1B1, RAP2A, VAMP5, EHD3, PPP1R9B, SPTBN1, PACS1, PID1, GOPC, SH3GLB1, PRKCZ, RAB13, SPTBN4, KALRN, TTC7B, KCNB2, MYRF, RACK1, CACNB2, GOLGA4, CACNB3, FA2H, IKBKB, CAV1, ANK3, EFR3B, SH3TC2, RAB8A, KCNIP4, TESC, RANGRF, NSF, CNST, RAMP2, DPP6, GOLGA7B, …	1966	277	16130	1.89562	2.86552e-05	2.70986e-05
GOTERM_BP	GO:0006811~ion transport	239	6.13202e-07	-6.2124	F2R, FGF13, SLC17A6, ARHGEF9, KCNK3, DENND5B, KCNJ12, CHRNB3, CACNA1I, TMEM63C, EHD3, GABRA4, CLIC2, APOE, GRIN2C, TMCO1, SLC10A7, CACNA1E, SLC6A1, NF1, CORO1A, SEPTIN2, ADAMTS8, KCNB2, CHP1, KCNH7, HCN1, CRHR1, KCNA2, SLC43A1, KCNJ9, CTNS, MYC, MCOLN2, LGALS3, NCOA1, SHANK3, DPYSL2, TCIRG1, PTPN3, HTT, SLCO3A1, DAPK1, ANO3, KCNQ2, ATP6V1G1, CACNA2D3, SLC9A7, GNAO1, TRPC1, PPFIA4, NDFIP1, SLC2A6,…	1966	1458	16130	1.3449	3.17209e-05	2.99978e-05
GOTERM_BP	GO:0009967~positive regulation of signal transduction	234	8.51931e-07	-6.0696	F2R, NUP62, PTPRJ, KRAS, IKBKE, FGFR2, GSK3B, ADRA1B, NEK6, STK36, CXCR4, SHOC2, PRMT5, MAPK8, TGFBR1, DUSP22, MAPKAPK3, SH2B1, MDFI, ZDHHC17, WWC1, NF1, LAMTOR5, F2RL2, CREBRF, RPTOR, RPS3, PSMA2, SEMA5A, PLEKHG5, AAK1, STX1B, SHANK3, G0S2, SHD, EZH2, MAP4K5, ADRB1, HIPK2, CUX2, HTT, IGSF9B, VEGFB, FADD, GSDME, GPRC5B, NCK1, CCN1, PRRX1, APAF1, CIB1, TERT, FGR, NDFIP1, IGFBP3, HMGB1, CYBA, IQGAP…	1966	1428	16130	1.34443	4.36341e-05	4.12638e-05
GOTERM_BP	GO:0006887~exocytosis	84	9.42918e-07	-6.02553	DNAJC5, STX11, UNC13A, STXBP2, SYT3, BCR, LIN7B, PLEK, ANXA1, MICAL3, MYO5A, STXBP1, RIMS3, BRPF3, NCS1, CACNA1I, ARFGEF2, VAMP5, SERPINE1, SMPD3, VEGFA, HMOX1, RAB27B, CACNA1A, PECAM1, SYT16, ARHGAP44, ABR, ADGRL1, DOC2A, SYNJ1, PCLO, CPLX2, RAB13, SYT14, BTK, CORO1A, NAPB, PIP5K1C, ATP13A2, PRKN, LYN, STXBP5, RAB11FIP2, CHP1, SRGN, ABCC4, RAP1B, SNAP47, ATP6AP1, F13A1, PIK3CG, EXOC8, STX1B, FN1…	1966	404	16130	1.70588	4.78207e-05	4.52231e-05
GOTERM_BP	GO:0050806~positive regulation of synaptic transmission	33	1.25635e-06	-5.90089	UNC13A, PPP1R9A, DLG4, STX1B, PTEN, SHANK3, PTK2B, RIMS1, IQSEC2, GRIN2A, DRD1, PLK2, MAPK1, CUX2, SLC8A2, IGSF9B, PRKCE, BRAF, PRKCZ, SLC24A2, CLSTN1, RAB3B, KIF5B, NLGN2, NETO1, MECP2, SLC8A3, LGI1, KALRN, NTSR1, SNAP47, CRTC1, SHANK2	1966	109	16130	2.48392	6.30982e-05	5.96707e-05
GOTERM_BP	GO:0048168~regulation of neuronal synaptic plasticity	20	1.34795e-06	-5.87033	UNC13A, APOE, NEURL1, DLG4, KRAS, SLC8A2, RAB3A, JPH3, NF1, SHANK3, KCNJ10, RASGRF1, NETO1, CAMK2A, RAB8A, KALRN, SYNGR1, GRM5, CAMK2B, SHISA7	1966	48	16130	3.41853	6.70476e-05	6.34056e-05
GOTERM_BP	GO:0032412~regulation of ion transmembrane transporter activity	47	1.4043e-06	-5.85254	HAMP, DLG4, CAV1, JPH1, CNIH2, GLRX, ANK3, CACNA2D1, MAPK8IP2, MYO5A, KCNAB1, DMD, SLMAP, SHANK3, PTK2B, MMP9, CACNB1, ATP1B1, FGF14, TESC, SCN2B, RANGRF, EHD3, CLIC2, NOS1, AKAP6, CAB39, PTPN3, HTT, DAPK1, PRKCE, SRI, CACNA1D, OPRM1, FGF12, JPH3, NEDD4L, NOS1AP, KIF5B, NLGN2, RASGRF1, MINK1, CHP1, NTSR1, CACNB2, CACNB3, CRHR1	1966	185	16130	2.08438	6.9185e-05	6.54269e-05
GOTERM_BP	GO:0006836~neurotransmitter transport	49	1.5621e-06	-5.80629	DNAJC5, STX11, UNC13A, SYT3, PPP1R9A, LIN7B, SLC17A6, STXBP1, RIMS3, PTPRN2, NOS1, GAD1, CACNA1A, SLC6A1, SYT16, NF1, ADGRL1, DOC2A, SYNJ1, PCLO, CPLX2, SYT14, SV2A, KCNJ10, CAMK2A, APBA1, NAPB, PIP5K1C, PRKN, RAP1B, SNAP47, SLC17A7, STX1B, SNCG, RIMS1, SYT2, RPH3A, DRD1, SV2B, PER2, NAPA, RAB3A, SLC6A17, BRAF, SYT7, RAB3B, PPFIA4, DOC2B, SLC6A13	1966	197	16130	2.04071	7.62332e-05	7.20922e-05
GOTERM_BP	GO:0043549~regulation of kinase activity	141	1.8842e-06	-5.72487	F2R, UBE2C, LRRC4, NUP62, HYAL2, PTPRJ, FGF13, KRAS, LCP2, MAP3K9, CKS1B, CDK4, SPRY1, LDB2, LRP8, CAMK1, CXCR4, CCNY, FBXW7, CDC6, EFNA5, KLF4, VEGFA, APOE, TGFBR1, DUSP22, CISH, MAPKAPK3, MDFI, AMBRA1, LRRTM4, NF1, PRKCZ, PIK3CB, UBA52, LRRC4B, LYN, CHP1, ADCY1, DNAJA1, AP006333.1, RPTOR, RPS3, MAPK10, NEURL1, DEPTOR, HSPA5, DDR2, TESC, SOCS1, EZH2, MAP4K5, ADARB1, RAC2, MIDN, APP, CDK5R1, GPRC…	1966	788	16130	1.46806	9.10929e-05	8.61447e-05
GOTERM_BP	GO:0055085~transmembrane transport	217	2.02387e-06	-5.69382	F2R, SLC17A6, ARHGEF9, KCNK3, DENND5B, NUP35, KCNJ12, CHRNB3, CACNA1I, TMEM63C, EHD3, GABRA4, CLIC2, SLC43A3, GRIN2C, TMCO1, ZDHHC17, SLC10A7, CACNA1E, SLC6A1, SRP9, TOMM20, CORO1A, ADAMTS8, KCNB2, TIMM9, CHP1, KCNH7, HCN1, ADD1, CRHR1, KCNA2, SLC43A1, SLC35D1, KCNJ9, CTNS, MYC, SEC61A1, MCOLN2, SHANK3, TCIRG1, PTPN3, HTT, DAPK1, ANO3, KCNQ2, ATP6V1G1, CACNA2D3, SLC9A7, TRPC1, SLC2A6, ATP1A1, CYB…	1966	1322	16130	1.34673	9.69394e-05	9.16736e-05
GOTERM_BP	GO:0097480~establishment of synaptic vesicle localization	36	2.07995e-06	-5.68195	CANX, DNAJC5, STX11, UNC13A, SYT3, CNIH2, STX1B, STXBP1, RIMS3, DENND1A, ITSN1, RIMS1, SYT2, DPYSL2, RPH3A, SH3GL2, FGF14, NAPA, DNM1, CACNA1A, RAB3A, SYT16, BRAF, ADGRL1, DOC2A, PACSIN1, SYNJ1, SYT7, PCLO, CPLX2, SYT14, NAPB, PIP5K1C, DOC2B, RAP1B, SNAP47	1966	127	16130	2.32568	9.78145e-05	9.25012e-05
GOTERM_BP	GO:0048489~synaptic vesicle transport	36	2.07995e-06	-5.68195	CANX, DNAJC5, STX11, UNC13A, SYT3, CNIH2, STX1B, STXBP1, RIMS3, DENND1A, ITSN1, RIMS1, SYT2, DPYSL2, RPH3A, SH3GL2, FGF14, NAPA, DNM1, CACNA1A, RAB3A, SYT16, BRAF, ADGRL1, DOC2A, PACSIN1, SYNJ1, SYT7, PCLO, CPLX2, SYT14, NAPB, PIP5K1C, DOC2B, RAP1B, SNAP47	1966	127	16130	2.32568	9.78145e-05	9.25012e-05
GOTERM_BP	GO:0051246~regulation of protein metabolic process	378	2.3642e-06	-5.62632	F2R, LRRC4, NUP62, PTPRJ, FGF13, KRAS, LCP2, ABTB1, CD276, FGFR2, NCBP2, GSK3B, UBXN2A, CDK4, ADRA1B, PHF19, RPL13A, DNAJC1, FOXL2, CXCR4, USP14, UHRF1, PRMT5, VIP, CDC6, EIF3H, MAPK8, APOE, TGFBR1, UHMK1, DUSP22, CISH, MAPKAPK3, GRIN2C, MDFI, BCL2L10, PRELID1, WWC1, LRRTM4, KLHL11, NF1, LAMTOR5, MMP14, SRP9, CREBRF, SERPINB8, SUSD4, TNRC6C, LRRC4B, MAD2L1, CHP1, RPS14, DNAJA1, CHEK2, AP006333.1,…	1966	2512	16130	1.23459	0.00011018	0.000104195
GOTERM_BP	GO:1903530~regulation of secretion by cell	117	2.64741e-06	-5.57718	F2R, SYT3, STXBP2, HYAL2, CD276, ANXA1, APLN, HADH, CACNA2D2, TRPV4, DNAJC1, FOXL2, NCS1, RAB11FIP3, CACNA1I, EFNA5, SMPD3, HMOX1, CACNA1A, SPTBN1, CACNA1E, OPRM1, NF1, PRKCZ, PCLO, CPLX2, SYT14, NLGN2, ATP13A2, NAPB, LYN, STXBP5, RAP1B, SCG5, CRHR1, KCNA2, STX1B, SIRT3, C2CD2L, PRKCA, CLOCK, PCK2, HIF1A, SYT2, DPYSL2, RPH3A, SOCS1, GAB2, CACNA1C, NAPA, PER2, RAC2, MIDN, RAB3A, VSNL1, SERP1, STXB…	1966	630	16130	1.52369	0.000122277	0.000115635
GOTERM_BP	GO:0016071~mRNA metabolic process	123	2.95291e-06	-5.52975	PHRF1, RPS8, RPS13, NCBP2, RBMX2, RPL13A, POLR2H, XRN2, RPS16, PRMT5, UHMK1, SF3A2, LSM3, PTBP2, RPS15, RPL35, THOC6, RPSA, GEMIN7, UBA52, TNRC6C, RPL19, RPS14, RPL21, RPS11, SNRPC, RPS3, RPL23A, RPL27, CPEB1, PPIL1, PPIH, RPL17, POLR2L, RPL36, LGALS3, EXOSC8, EXOSC6, CELF5, RPL39, SNRPG, RPL30, RPS2, SNRPD2, RPL18, RPL38, RPS19, ADARB2, RPL14, ADARB1, PRPF38A, APP, RPS5, RPL4, RPL10A, SPEN, DIS3…	1966	672	16130	1.50171	0.000135181	0.000127838
GOTERM_BP	GO:0022898~regulation of transmembrane transporter activity	47	3.08059e-06	-5.51137	HAMP, DLG4, CAV1, JPH1, CNIH2, GLRX, ANK3, CACNA2D1, MAPK8IP2, MYO5A, KCNAB1, DMD, SLMAP, SHANK3, PTK2B, MMP9, CACNB1, ATP1B1, FGF14, TESC, SCN2B, RANGRF, EHD3, CLIC2, NOS1, AKAP6, CAB39, PTPN3, HTT, DAPK1, PRKCE, SRI, CACNA1D, OPRM1, FGF12, JPH3, NEDD4L, NOS1AP, KIF5B, NLGN2, RASGRF1, MINK1, CHP1, NTSR1, CACNB2, CACNB3, CRHR1	1966	190	16130	2.02953	0.000139788	0.000132195
GOTERM_BP	GO:0010959~regulation of metal ion transport	69	3.32584e-06	-5.4781	F2R, STC2, PTPN6, CACNA2D1, MYO5A, DMD, SLMAP, BAX, CACNB1, ATP1B1, CAMK2B, SCN2B, EHD3, CLIC2, AMIGO1, NOS1, AKAP6, CAB39, KCNAB2, PDGFRB, SRI, CACNA1D, JPH3, NEDD4L, SARAF, NOS1AP, SPTBN4, CORO1A, CAMK2A, LYN, CNTN1, CHP1, NTSR1, CACNB2, CACNB3, CRHR1, PIK3CG, HAMP, CAV1, JPH1, GLRX, ANK3, KCNAB1, LGALS3, PTK2B, KCNIP4, FGF14, TESC, RANGRF, DRD1, CACNA1C, DPP6, PTPN3, HTT, THY1, CACNA2D4, PRKCE…	1966	322	16130	1.7581	0.000149605	0.000141478
GOTERM_BP	GO:0036211~protein modification process	547	3.61162e-06	-5.4423	F2R, NUP62, IKBKE, ST6GALNAC6, ABTB1, LCP2, SMAD5, FGFR2, GSK3B, UBXN2A, CDK4, ADRA1B, USP14, PRMT5, DUSP11, CDC6, CISH, DUSP22, MAPKAPK3, GRIN2C, MDFI, ZDHHC17, NUP37, WWC1, NF1, RIOX1, KSR2, NSD3, BTK, DNAJA1, CHEK2, AP006333.1, DPY30, AAAS, HERC4, ACTL6A, USP20, CDK6, RASGRF2, HSPA5, AAK1, PAK6, DDB2, SIRT3, MYC, SHANK3, HCK, DDR2, BTBD6, MAP4K5, CHRM3, HIPK2, GOLGA7B, SPI1, PPTC7, VEGFB, APP,…	1966	3818	16130	1.17544	0.000159683	0.000151009
GOTERM_BP	GO:0006464~cellular protein modification process	547	3.61162e-06	-5.4423	F2R, NUP62, IKBKE, ST6GALNAC6, ABTB1, LCP2, SMAD5, FGFR2, GSK3B, UBXN2A, CDK4, ADRA1B, USP14, PRMT5, DUSP11, CDC6, CISH, DUSP22, MAPKAPK3, GRIN2C, MDFI, ZDHHC17, NUP37, WWC1, NF1, RIOX1, KSR2, NSD3, BTK, DNAJA1, CHEK2, AP006333.1, DPY30, AAAS, HERC4, ACTL6A, USP20, CDK6, RASGRF2, HSPA5, AAK1, PAK6, DDB2, SIRT3, MYC, SHANK3, HCK, DDR2, BTBD6, MAP4K5, CHRM3, HIPK2, GOLGA7B, SPI1, PPTC7, VEGFB, APP,…	1966	3818	16130	1.17544	0.000159683	0.000151009
GOTERM_BP	GO:1990778~protein localization to cell periphery	53	3.64676e-06	-5.43809	ROCK2, EHD2, LIN7B, SYS1, MAP7, RAPGEF2, FGF13, ANXA2, RER1, TMEM150A, MYO5A, STXBP1, SLMAP, TMED2, CLIP3, ATP1B1, RAP2A, VAMP5, EHD3, PPP1R9B, SPTBN1, PACS1, PID1, GOPC, PRKCZ, RAB13, SPTBN4, KALRN, TTC7B, KCNB2, RACK1, CACNB2, GOLGA4, CACNB3, IKBKB, NUBP1, CAV1, ANK3, EFR3B, RAB8A, KCNIP4, TESC, RANGRF, NSF, CNST, RAMP2, DPP6, GOLGA7B, GPR158, FLNA, PACSIN1, CIB1, KIF5B	1966	226	16130	1.92406	0.00015987	0.000151186
GOTERM_BP	GO:0051247~positive regulation of protein metabolic process	241	3.95574e-06	-5.40277	F2R, FGF13, KRAS, LCP2, CD276, FGFR2, GSK3B, CDK4, ADRA1B, PHF19, FOXL2, CXCR4, UHRF1, VIP, CDC6, MAPK8, APOE, TGFBR1, UHMK1, DUSP22, MAPKAPK3, MDFI, BCL2L10, PRELID1, WWC1, MMP14, CREBRF, MAD2L1, CHP1, CHEK2, RPTOR, RPS3, PSMA2, HSPA5, MYC, ANAPC11, DDR2, EZH2, MAP4K5, HIPK2, DAPK1, VEGFB, APP, FADD, GPRC5B, NCK1, CCN1, SERP1, APAF1, CIB1, SRCIN1, NDFIP1, PPP1R16B, IGFBP3, HMGB1, IQGAP1, HSPB1, …	1966	1508	16130	1.31119	0.000171958	0.000162618
GOTERM_BP	GO:0007417~central nervous system development	156	4.36971e-06	-5.35955	SPEF2, SHC3, HDAC11, ARPC5, FGF13, KRAS, ANP32B, KIRREL3, FGFR2, GSK3B, CLCF1, RTN4, AGTPBP1, PAFAH1B2, KCNK3, RRM1, LRP8, SLITRK5, GART, STK36, XRN2, CXCR4, PLXNA3, UNC5C, PRMT5, PCDH9, GABRA4, TSKU, CACNA1A, BCL11B, CCDC85C, PTBP2, NF1, PCDH18, THOC6, SEZ6L2, GNB4, SYNJ1, ZEB1, TAGLN3, KCNJ10, LYN, ACTL6A, SEMA5A, NEURL1, ECE2, CDK6, HSPA5, MT-ND4, CTNS, MRTFA, EFHC1, MYC, MT-CO1, PADI2, NOTCH3…	1966	904	16130	1.41582	0.000188371	0.000178139
GOTERM_BP	GO:0017157~regulation of exocytosis	44	4.97717e-06	-5.30302	ATP6AP1, STXBP2, SYT3, BCR, ANXA1, STX1B, STXBP1, RIMS3, UNC13D, RIMS1, SYT2, RPH3A, NCS1, CACNA1I, NSF, GAB2, SMPD3, NAPA, HMOX1, SCAMP5, RAB27B, RAC2, CACNA1A, RAB3A, SYT16, CPLANE2, ABR, BRAF, DOC2A, VSNL1, SYT7, PCLO, CPLX2, SYT14, RAB3B, ZAP70, NAPB, ATP13A2, PRKN, FGR, DOC2B, LYN, STXBP5, RAP1B	1966	176	16130	2.05112	0.000212784	0.000201226
GOTERM_BP	GO:1902533~positive regulation of intracellular signal transduction	157	5.66785e-06	-5.24658	F2R, NUP62, PTPRJ, KRAS, IKBKE, FGFR2, MAPK8IP2, TRIM62, MAP3K9, CLCF1, TRPV4, ADRA1B, NEK6, SHOC2, CXCR4, FBXW7, GPR183, MCF2L, CPNE1, GPR18, DDIT3, VEGFA, TGFBR1, HMOX1, DUSP22, MAPKAPK3, MDFI, ZDHHC17, WWC1, OPRM1, LAMTOR5, LRRK1, PRKCZ, F2RL2, PIK3CB, PPM1A, RASGRF1, UBA52, LYN, RAP1B, RPTOR, RPS3, MAPK10, SEMA5A, PLEKHG5, NGFR, GPNMB, PRKCA, SOCS1, EZH2, PLCB1, MAP4K5, PLK2, PHB2, HIPK2, ADR…	1966	915	16130	1.40776	0.000240326	0.000227271
GOTERM_BP	GO:0016079~synaptic vesicle exocytosis	27	6.74149e-06	-5.17124	DNAJC5, STX11, UNC13A, SYT3, STX1B, STXBP1, RIMS3, RIMS1, SYT2, RPH3A, NAPA, CACNA1A, RAB3A, SYT16, BRAF, ADGRL1, DOC2A, SYNJ1, SYT7, PCLO, CPLX2, SYT14, NAPB, PIP5K1C, DOC2B, RAP1B, SNAP47	1966	86	16130	2.57582	0.000283526	0.000268125
GOTERM_BP	GO:0072659~protein localization to plasma membrane	49	6.79778e-06	-5.16763	ROCK2, EHD2, SYS1, MAP7, RAPGEF2, FGF13, ANXA2, RER1, TMEM150A, MYO5A, STXBP1, SLMAP, TMED2, CLIP3, ATP1B1, RAP2A, VAMP5, EHD3, PPP1R9B, SPTBN1, PACS1, PID1, GOPC, PRKCZ, RAB13, SPTBN4, TTC7B, KCNB2, RACK1, CACNB2, GOLGA4, CACNB3, IKBKB, ANK3, EFR3B, RAB8A, KCNIP4, TESC, RANGRF, NSF, CNST, RAMP2, DPP6, GOLGA7B, GPR158, FLNA, PACSIN1, CIB1, KIF5B	1966	207	16130	1.94212	0.000283588	0.000268183
GOTERM_BP	GO:0048513~animal organ development	455	7.89226e-06	-5.1028	ARPC5, EGR3, PLEK, CD276, SMAD5, FGFR2, GSK3B, TFEB, CDK4, KCNK3, SOBP, PFDN5, FOXL2, PRMT5, ACP6, PCSK5, MDFI, GMNN, THBS3, PRELID1, FST, PCDH18, NF1, MMP14, SEZ6L2, ZEB1, BTK, RPL19, ADD1, ACTL6A, CDK6, TLE5, HSPA5, HLX, EFHC1, MYC, MT-CO1, NOTCH3, TMED10, SHANK3, DPYSL2, DDR2, ANGPT2, NME1, GAB2, HIPK2, FOXK1, SPI1, VEGFB, APP, FADD, GSDME, AP2B1, RAB23, TACC1, RDH10, GNAO1, PTPRN, GLIS2, RREB…	1966	3129	16130	1.19304	0.000326613	0.000308871
GOTERM_BP	GO:0055082~cellular chemical homeostasis	127	8.18229e-06	-5.08712	F2R, GPR12, CACNA2D1, MYO5A, TRPV4, ADRA1B, KCNK3, ADM, TBXAS1, CXCR4, AQP7, GPR18, DDIT3, CLIC2, APOE, HMOX1, CACNA1A, SLC8A2, TMCO1, OPRM1, JPH3, F2RL2, PIK3CB, AQP3, CORO1A, ATP13A2, DMXL2, LYN, CHP1, SLC4A3, CCR9, C2CD2L, ATP6V1E1, MYC, PCK2, HIF1A, EDN2, SLC30A7, NME1, TCIRG1, TMEM178A, CACNA1C, HKDC1, HTT, APP, ATP6V1G1, RYR1, SLC9A7, VSNL1, TRPC1, KIF5B, EDNRA, SLC4A2, SLC8A1, NDFIP1, PTPR…	1966	713	16130	1.46139	0.000335929	0.000317681
GOTERM_BP	GO:0031400~negative regulation of protein modification process	107	8.55421e-06	-5.06782	UBE2C, LRRC4, NUP62, ISG15, HYAL2, PTPRJ, PINX1, PSMB4, NIBAN1, SPRY1, KLF4, APOE, DUSP22, CISH, LRRTM4, PID1, NF1, LRRK1, PRKCZ, GFRA2, UBA52, LRRC4B, LYN, MAD2L1, CHP1, DNAJA1, AP006333.1, RPS3, PSMA2, DEPTOR, PSMB10, SIRT3, MYC, ANAPC11, LDLRAD4, TESC, SOCS1, ADARB1, PER2, SPI1, SAMSN1, APC, NCK1, CIB1, ARPP19, C1QL4, SRCIN1, CRY2, PPP1R16B, IGFBP3, DDIT4, HSPB1, ROCK2, FRY, PTPN6, PRKAR1A, PH…	1966	578	16130	1.51882	0.000348433	0.000329506
GOTERM_BP	GO:0060292~long term synaptic depression	12	9.33805e-06	-5.02974	PICK1, PPP1R9A, SHANK3, PTK2B, IQSEC2, PTEN, STXBP1, ABHD6, DRD1, PLK2, SLC24A2, SHANK2	1966	21	16130	4.68827	0.000377389	0.000356889
GOTERM_BP	GO:0051348~negative regulation of transferase activity	73	9.56208e-06	-5.01945	CTC1, UBE2C, LRRC4, NUP62, HYAL2, PTPRJ, PTPN6, PRKAR1A, PINX1, PSMB4, IBTK, GSK3B, ZFYVE28, PPP2CA, PTEN, PSMB1, SPRY1, SOCS2, DUSP8, PKN1, DUSP26, APOE, CISH, DUSP22, GADD45A, LRRTM4, NF1, YWHAG, HMGCR, UBA52, PRKN, LRRC4B, LYN, MAD2L1, CHP1, MAPK8IP1, RACK1, DNAJA1, AP006333.1, PSMA2, PSME1, RTN4RL1, CAV1, DEPTOR, NPM1, PSMB10, PRKAR2B, SORL1, ANAPC11, CDC20, LRRC4C, CHCHD10, PSMB3, TESC, TRIB…	1966	357	16130	1.67767	0.000383447	0.000362618
GOTERM_BP	GO:0032268~regulation of cellular protein metabolic process	351	1.00026e-05	-4.99989	F2R, LRRC4, NUP62, PTPRJ, FGF13, KRAS, LCP2, FGFR2, NCBP2, GSK3B, UBXN2A, CDK4, ADRA1B, PHF19, RPL13A, DNAJC1, FOXL2, CXCR4, USP14, UHRF1, PRMT5, CDC6, EIF3H, MAPK8, APOE, TGFBR1, UHMK1, DUSP22, CISH, MAPKAPK3, MDFI, BCL2L10, PRELID1, WWC1, LRRTM4, NF1, LAMTOR5, MMP14, SRP9, SERPINB8, SUSD4, TNRC6C, LRRC4B, MAD2L1, CHP1, RPS14, DNAJA1, CHEK2, AP006333.1, RPTOR, RPS3, PSMA2, STK40, CPEB1, HSPA5, S…	1966	2346	16130	1.22752	0.000398025	0.000376404
GOTERM_BP	GO:0032409~regulation of transporter activity	48	1.0124e-05	-4.99465	HAMP, DLG4, CAV1, JPH1, CNIH2, GLRX, ANK3, CACNA2D1, MAPK8IP2, MYO5A, KCNAB1, DMD, SLMAP, SHANK3, PTK2B, MMP9, CACNB1, ATP1B1, FGF14, TESC, SCN2B, RANGRF, EHD3, CLIC2, NOS1, AKAP6, CAB39, PTPN3, HTT, DAPK1, PRKCE, SRI, CACNA1D, OPRM1, FGF12, JPH3, NEDD4L, NOS1AP, KIF5B, NLGN2, RASGRF1, NDFIP1, MINK1, CHP1, NTSR1, CACNB2, CACNB3, CRHR1	1966	204	16130	1.93046	0.00039965	0.000377941
GOTERM_BP	GO:0042274~ribosomal small subunit biogenesis	23	1.01979e-05	-4.99149	WDR3, TSR2, RPS8, RPS5, RPS15, RPS7, RPSA, RPS28, RPS21, LSM6, RPS27L, RPS6, RPS10, SNU13, EMG1, RPS16, RRP7A, RPL38, RPS19, RPS14, RPS17, UTP6, BMS1	1966	68	16130	2.77504	0.00039965	0.000377941
GOTERM_BP	GO:0032271~regulation of protein polymerization	44	1.22872e-05	-4.91055	RPS3, CAPG, PPP1R9A, HCLS1, ARPC5, SPTAN1, CYFIP1, ACTR3B, TWF1, TPPP, FHOD3, MYO1C, BAIAP2, CDC42EP4, FKBP4, TMOD3, CORO1B, NCKAP1, PTK2B, INPP5J, CLIP3, ARPC1B, HCK, MAPT, PICK1, WAS, PFN1, MTOR, ARPC3, PRKCE, SPTBN1, ABI2, SPTBN2, NCK1, DCTN1, IQGAP2, SPTBN4, CORO1A, WASF1, RICTOR, VASP, MAPRE1, CDC42EP5, ADD1	1966	182	16130	1.9835	0.000477908	0.000451948
GOTERM_BP	GO:1901652~response to peptide	86	1.29382e-05	-4.88813	STC2, NAMPT, PRKAR1A, ATP6V0E1, ANXA1, MYO5A, HADH, DAG1, TRPV4, BAIAP2, ADM, STAT3, TIMP4, SHC1, SOCS2, ID1, CDC6, KLF4, JUND, CISH, GNG5, SREBF1, PPP1R9B, CRY1, SIK2, PID1, LPIN1, PRKCZ, YWHAG, GNB4, RAB13, IGFBP5, EIF4EBP1, CAMK2A, PKLR, IRF5, LYN, PPARA, ADCY1, RAP1B, CRHR1, ATP6AP1, CPEB1, CAV1, NGFR, UCP2, RPE65, CPEB2, GNG7, ATP6V1E1, PDK2, MYC, MYO1C, MT-CYB, PRKAR2B, GPR22, CYBB, RAB8A, …	1966	444	16130	1.58916	0.000499471	0.00047234
GOTERM_BP	GO:0031401~positive regulation of protein modification process	187	1.39398e-05	-4.85574	F2R, UBE2C, FGF13, KRAS, ANXA2, LCP2, PSMB4, FGFR2, MAPK8IP2, GSK3B, MAP3K9, NIBAN1, CKS1B, CLCF1, TRPV4, ADRA1B, PHF19, LRP8, CAMK1, MMP9, CXCR4, CCNY, FBXW7, RAP2A, GPR183, CDC6, EFNA5, VEGFA, TGFBR1, DUSP22, MAPKAPK3, NUPR1, MDFI, ARRDC3, WWC1, OPRM1, LRRK1, PRKCZ, GFRA2, PIK3CB, UBA52, LYN, MAD2L1, CHP1, ADCY1, CHEK2, RAP1B, RPTOR, RPS3, PSMA2, MAPK10, NEURL1, HSPA5, NGFR, GPNMB, PSMB10, PRKC…	1966	1143	16130	1.34229	0.000534154	0.000505139
GOTERM_BP	GO:0032270~positive regulation of cellular protein metabolic process	225	1.58712e-05	-4.79939	F2R, FGF13, KRAS, LCP2, FGFR2, GSK3B, CDK4, ADRA1B, PHF19, FOXL2, CXCR4, UHRF1, CDC6, APOE, TGFBR1, UHMK1, DUSP22, MAPKAPK3, MDFI, BCL2L10, PRELID1, WWC1, MMP14, MAD2L1, CHP1, CHEK2, RPTOR, RPS3, PSMA2, HSPA5, MYC, ANAPC11, DDR2, EZH2, MAP4K5, HIPK2, DAPK1, VEGFB, APP, FADD, GPRC5B, NCK1, CCN1, SERP1, APAF1, CIB1, SRCIN1, NDFIP1, PPP1R16B, IGFBP3, HMGB1, IQGAP1, ROCK2, PPP1R9A, MAP3K10, PRKAR1A, …	1966	1420	16130	1.30001	0.00060369	0.000570897
GOTERM_BP	GO:0007214~gamma-aminobutyric acid signaling pathway	12	1.66192e-05	-4.77939	GABRA1, GABRA3, GABBR2, CACNA1A, GABRG2, GABRA5, GABRR1, GABBR1, HTR4, PLCL1, GABRB2, GABRA4	1966	22	16130	4.47517	0.000627525	0.000593438
GOTERM_BP	GO:0051046~regulation of secretion	121	1.74993e-05	-4.75698	F2R, SYT3, STXBP2, HYAL2, ACSL4, CD276, ANXA1, APLN, HADH, CACNA2D2, TRPV4, DNAJC1, FOXL2, NCS1, RAB11FIP3, CACNA1I, EFNA5, SMPD3, HMOX1, CACNA1A, SPTBN1, CACNA1E, OPRM1, SLC6A1, NF1, PRKCZ, PCLO, CPLX2, SYT14, NLGN2, ATP13A2, NAPB, LYN, STXBP5, RAP1B, SCG5, CRHR1, KCNA2, STX1B, SIRT3, C2CD2L, PRKCA, CLOCK, PCK2, HIF1A, SYT2, DPYSL2, RPH3A, SOCS1, GAB2, CACNA1C, NAPA, PER2, RAC2, MIDN, RAB3A, VSN…	1966	683	16130	1.4535	0.000651857	0.000616448
GOTERM_BP	GO:0044770~cell cycle phase transition	101	1.75156e-05	-4.75658	CTC1, GTSE1, UBE2C, PSMB4, ANXA1, ODF2, CKS1B, CDK4, NEK6, MCM8, CCNY, FBXW7, CDC6, TFDP1, PID1, WEE1, EIF4EBP1, UBA52, MAD2L1, MCM5, CHEK2, RPA3, RPTOR, PSMA2, CDK6, MCM6, GPNMB, PSMB10, ANAPC11, RAD51B, RAB8A, EZH2, PLCB1, PLK2, PHB2, RPA2, APP, SUSD2, APC, STXBP4, CKS2, TERT, ARPP19, POLA2, MCM2, PTPN6, TIPIN, PTEN, PSMB1, DGKZ, TMOD3, PHLDA1, MARK4, TCIM, BAX, PRIM2, TUBB, MCM3, CEP72, GADD45…	1966	547	16130	1.5149	0.000651857	0.000616448
GOTERM_BP	GO:0051050~positive regulation of transport	155	1.7968e-05	-4.7455	GTSE1, F2R, EHD2, HYAL2, ANP32B, ANXA2, SULF2, CD276, CACNA2D1, ANXA1, NCBP2, GSK3B, APLN, TRPV4, STING1, CAMK1, FOXL2, NCS1, CACNA1I, FBXW7, EHD3, SMPD3, AMIGO1, MAPK8, VEGFA, APOE, TFDP1, TGFBR1, PRELID1, SPTBN1, SLC6A1, GPR26, PRKCZ, CREBRF, SYNJ1, PLTP, PPM1A, NLGN2, ATP13A2, STXBP5, CHP1, ACTL6A, SELE, SEMA5A, GLRX, STX1B, SIRT3, C2CD2L, LGALS3, MIEF2, SHANK3, PTX3, PCK2, HIF1A, DPYSL2, TESC…	1966	920	16130	1.38228	0.000663919	0.000627855
GOTERM_BP	GO:0060047~heart contraction	54	1.93011e-05	-4.71442	FGF13, SMAD5, CACNA2D1, APLN, CACNA2D2, DMD, ADRA1B, KCNK3, ADM, KCNJ12, CACNB1, ATP1B1, SCN2B, SCN10A, CACNA1F, EHD3, CLIC2, NOS1, SLC8A2, SREBF1, SRI, CACNA1D, NEDD4L, NOS1AP, SPTBN4, CACNB2, TMEM65, CACNB3, PIK3CG, HDAC4, DSP, CAV1, MEF2A, SGCD, KCNIP4, EDN2, RANGRF, CACNA1C, ADRB1, MTOR, RPS6KA2, GSK3A, CACNA2D4, VEGFB, FGF12, CACNA2D3, RYR1, HCN4, FLNA, TRPC1, SLC8A3, ATP2B2, SLC8A1, ATP1A1	1966	245	16130	1.80833	0.000706702	0.000668314
GOTERM_BP	GO:0032870~cellular response to hormone stimulus	111	1.93991e-05	-4.71222	NUP62, ANXA1, MYO5A, GRIP1, BAIAP2, NPC1, CDC6, EFNA5, CTSB, CISH, GNG5, PPARGC1B, PID1, PRKCZ, GNB4, CREBRF, EIF4EBP1, PKLR, LYN, PLOD3, ADCY1, DNAJA1, RAP1B, CRHR1, CPEB1, NGFR, CPEB2, TNC, ATP6V1E1, CLOCK, MYC, PADI2, FKBP4, NCOA1, RAB8A, SOCS1, TCIRG1, PHB2, GNG12, RAMP2, STAT5A, NR3C2, ATP6V1G1, SSTR1, STXBP4, CRY2, PXN, ATP1A1, DDIT4, CYBA, IGFBP1, WT1, NAMPT, PRKAR1A, ATP6V0E1, PHB, NPAS4,…	1966	616	16130	1.4784	0.000706702	0.000668314
GOTERM_BP	GO:0060291~long-term synaptic potentiation	18	1.98955e-05	-4.70125	MAPK1, PPP1R9A, SLC8A2, PTEN, BRAF, SLC24A2, PRKCZ, SHANK3, PTK2B, MECP2, SLC8A3, KALRN, GRIN2A, SNAP47, DRD1, CRTC1, PLK2, SHANK2	1966	47	16130	3.14214	0.000719716	0.000680621
GOTERM_BP	GO:0099565~chemical synaptic transmission, postsynaptic	22	2.14659e-05	-4.66825	PPP1R9A, DLG4, CUX2, GSK3A, SLC17A7, GRIN2C, IGSF9B, STX1B, MAPK8IP2, NPAS4, GSK3B, OPRM1, PTEN, PRKCZ, SHANK3, PTK2B, NETO1, MECP2, NLGN2, RIMS1, GRIN2A, NTSR1	1966	66	16130	2.73483	0.000771132	0.000729244
GOTERM_BP	GO:0007166~cell surface receptor signaling pathway	391	2.17649e-05	-4.66224	NUP62, ARPC5, PLEK, LCP2, SMAD5, FGFR2, NCBP2, GSK3B, PFDN5, SHOC2, TNFSF13B, CISH, DUSP22, MAPKAPK3, GRIN2C, ARPC3, MDFI, BCL2L10, UNC5A, FST, NF1, MMP14, ZEB1, BTK, CORO1A, SEPTIN2, TNRC6C, AP006333.1, CRHR1, CDK6, TLE5, HSPA5, AAK1, STX1B, NCF2, MYC, NOTCH3, CRIM1, SHANK3, EGFL7, G0S2, TSPAN18, HCK, DDR2, NCF4, ANGPT2, GAB2, HIPK2, CUX2, CMKLR1, IGSF9B, VEGFB, APP, DAPK1, FADD, SNX3, ATP6V1G1,…	1966	2669	16130	1.20193	0.000776481	0.000734302
GOTERM_BP	GO:0007215~glutamate receptor signaling pathway	23	2.20056e-05	-4.65747	DLG4, CNIH2, GRIN2C, DAPK1, MAPK8IP2, APP, GRM2, GRM3, OPRM1, CDK5R1, SSTR1, GRIN2B, TRPM3, SHANK3, RASGRF1, PTK2B, NLGN2, GRIN2A, MINK1, GRM5, PLCB1, HOMER3, GRIK4	1966	71	16130	2.65779	0.00077969	0.000737337
GOTERM_BP	GO:0051347~positive regulation of transferase activity	114	2.52992e-05	-4.59689	RFC4, F2R, UBE2C, FGF13, KRAS, LCP2, PSMB4, MAP3K9, CKS1B, LRP8, CAMK1, CXCR4, CCNY, FBXW7, CDC6, EFNA5, KLF4, VEGFA, TGFBR1, MAPKAPK3, MDFI, ARRDC3, AMBRA1, PRKCZ, PIK3CB, UBA52, LYN, MAD2L1, ADCY1, RPTOR, RPS3, PSMA2, MAPK10, NEURL1, HSPA5, PSMB10, MYC, ANAPC11, RPS2, DDR2, SOCS1, EZH2, MAP4K5, CDK5R1, GPRC5B, DCUN1D5, CCN1, CKS2, CIB1, SRCIN1, FGR, HMGB1, CD4, IQGAP1, PPP1R9A, RAPGEF2, PRKAR1A…	1966	640	16130	1.46142	0.000890291	0.00084193
GOTERM_BP	GO:0006461~protein complex assembly	227	2.59451e-05	-4.58594	CAPG, NUP62, FGF13, ARPC5, IKBKE, PLEK, MAP7D3, GSK3B, MIS12, KCNJ12, COL1A2, CHRNB3, ARPC1B, KCTD16, ATL3, EHD3, ARPC3, GMNN, DCTPP1, SLC6A1, GOPC, SYNJ1, TOMM20, CORO1A, CLPP, KCNB2, CDC42EP5, CHP1, KCTD5, HMGB2, SNAP47, ADD1, RPS3, DGKH, CATIP, KCNA2, NDUFA10, DDB2, STX1B, TWF1, MYC, CDC42EP4, MIEF2, TMED10, NCKAP1, HCK, SEPTIN9, RPS19, TCIRG1, PFN1, FADD, MPP6, MMP1, AP2B1, LPXN, NCK1, TRAPPC…	1966	1445	16130	1.28887	0.000906853	0.000857592
GOTERM_BP	GO:0051650~establishment of vesicle localization	53	2.79222e-05	-4.55405	CANX, DNAJC5, STX11, UNC13A, SYT3, FNBP1L, MYO5A, STXBP1, RIMS3, DENND1A, ITSN1, TMED2, SH3GL2, KIFAP3, RAB27B, CACNA1A, LMAN1, SYT16, ADGRL1, PRKCZ, DOC2A, SYNJ1, PCLO, CPLX2, SYT14, SEC13, NAPB, PIP5K1C, RAP1B, CTSC, SNAP47, CNIH2, STX1B, TMED10, RIMS1, SYT2, DPYSL2, RPH3A, TMED9, FGF14, NSF, CTSZ, NAPA, DNM1, HTT, RAB3A, BRAF, PACSIN1, TRAPPC9, DCTN1, SYT7, KIF5B, DOC2B	1966	242	16130	1.79685	0.000969405	0.000916746
GOTERM_BP	GO:0000082~G1/S transition of mitotic cell cycle	50	2.88583e-05	-4.53973	GTSE1, MCM2, ANXA1, PTEN, CDK4, DGKZ, MARK4, MCM8, PRIM2, BAX, CDC6, TFDP1, MCM3, GADD45A, MCM4, MYO16, SKP2, RPS6, EIF4EBP1, UBA52, CAMK2A, RBM38, SOX4, MCM5, CHEK2, RPA3, RPTOR, ACVR1B, CDK6, RCC1, TYMS, CNOT9, NPM1, MCM6, GPNMB, ORC1, PLCB1, EZH2, PIAS1, TP53, PLK2, FBXO31, PCNA, RPA2, MCM10, RHOU, RPS27L, E2F7, TERT, POLA2	1966	224	16130	1.83136	0.000995225	0.000941164
GOTERM_BP	GO:0022618~ribonucleoprotein complex assembly	48	2.91286e-05	-4.53568	RPL23A, CLNS1A, NPM1, EIF3E, RPL13A, RPF1, SNRPG, SETX, RPL6, RPS10, SNRPD1, C1QBP, SNRPD2, EIF3B, RPL38, RPS19, SNRPE, PRMT5, EIF3H, EIF2S3, SF3A2, NIP7, RUVBL1, RPS5, LSM3, PTBP2, RPS15, EIF6, MRPL11, RPSA, RPS28, RPL12, EIF3I, RPL24, GEMIN7, SNRPB, RPS27L, RPL5, RRP7A, RPS14, RPS17, RPL10, EIF2D, EIF3D, EIF3F, SNRPC, RPL11, BMS1	1966	212	16130	1.85762	0.000997895	0.000943689
GOTERM_BP	GO:0007420~brain development	120	2.98303e-05	-4.52534	SPEF2, ARPC5, FGF13, KRAS, ANP32B, KIRREL3, FGFR2, GSK3B, RTN4, AGTPBP1, PAFAH1B2, KCNK3, RRM1, LRP8, SLITRK5, GART, STK36, XRN2, PLXNA3, UNC5C, PCDH9, TSKU, CACNA1A, BCL11B, CCDC85C, PTBP2, NF1, PCDH18, SEZ6L2, GNB4, SYNJ1, SEMA5A, NEURL1, ECE2, CDK6, HSPA5, MT-ND4, CTNS, MRTFA, EFHC1, MYC, MT-CO1, PADI2, NOTCH3, NCOA1, SHANK3, CHD8, HIF1A, DPYSL2, EZH2, PLCB1, NME1, NUMBL, GNG12, ENO3, WHRN, NA…	1966	684	16130	1.43938	0.00101358	0.000958524
GOTERM_BP	GO:0001666~response to hypoxia	60	2.99784e-05	-4.52319	STC2, SMAD3, MT-ND5, PTEN, ACVRL1, KCNK3, ADM, NFE2L2, BMP2, CXCR4, PLOD1, HMOX2, ATP1B1, NOS1, VEGFA, HMOX1, ADSL, TBL2, NF1, MMP14, EIF4EBP1, UBA52, PKLR, PPARA, P4HB, CPEB1, CAV1, PDLIM1, MT-ND4, LOXL2, UCP2, CPEB2, MT-CYB, AQP1, CYBB, PTK2B, HIF1A, ZFP36L1, ANGPT2, TP53, CBFA2T3, RAMP2, HIPK2, MTOR, PRKCE, VEGFB, RYR1, APAF1, DNMT3B, MECP2, SLC8A3, TERT, EDNRA, TGFBR2, SLC8A1, AHCY, DDIT4, PR…	1966	286	16130	1.72122	0.00101358	0.000958524
GOTERM_BP	GO:0044772~mitotic cell cycle phase transition	95	3.05623e-05	-4.51481	CTC1, GTSE1, UBE2C, MCM2, PTPN6, PSMB4, ANXA1, ODF2, CKS1B, PTEN, CDK4, PSMB1, DGKZ, TMOD3, PHLDA1, MARK4, NEK6, MCM8, PRIM2, BAX, CCNY, CDC6, TFDP1, CEP72, TUBB, MCM3, GADD45A, PPP1R9B, MCM4, CDK14, PID1, MYO16, YWHAG, SKP2, WEE1, RPS6, EIF4EBP1, UBA52, CAMK2A, MAD2L1, RBM38, SOX4, MCM5, CHEK2, RPA3, RPTOR, PSMA2, PSME1, ACVR1B, CDK6, RCC1, TYMS, HAUS1, CNOT9, NPM1, MCM6, GPNMB, PSMB10, PRKAR2B,…	1966	514	16130	1.51639	0.00102661	0.000970848
GOTERM_BP	GO:0051493~regulation of cytoskeleton organization	81	3.28233e-05	-4.48382	CAPG, ROCK2, PPP1R9A, SPTAN1, FGF13, ARPC5, SMAD3, STMN4, ACTR3B, PLEK, STMN3, TRPV4, BAIAP2, BCAS3, TMOD3, ID1, CLIP3, ARPC1B, PLXNA3, MID1, EFNA5, LIMA1, CEP97, TGFBR1, WAS, ARPC3, PDGFRB, SPTBN1, ABI2, SPTBN2, WASF2, SPTBN4, CORO1A, GPR65, PRKN, CDC42EP5, ADD1, SPICE1, RPS3, NUBP1, SEMA5A, HCLS1, CYFIP1, NTRK3, NPM1, CCSAP, TWF1, FHOD3, MYO1C, CDC42EP4, FKBP4, SHANK3, NCKAP1, SORBS3, CORO1B, S…	1966	422	16130	1.57479	0.00109545	0.00103595
GOTERM_BP	GO:0006396~RNA processing	152	3.51063e-05	-4.45461	PHRF1, RPS8, RPS13, NCBP2, RBMX2, RPL13A, POLR2H, XRN2, RPS16, PRMT5, DUSP11, UHMK1, SF3A2, PNO1, LSM3, PTBP2, RPS15, KARS1, RPL35, THOC6, RPSA, GEMIN7, UBA52, EMG1, PUS7, RPL19, RPS14, RPL21, RPS11, SNRPC, HSD17B10, RPS3, RPL23A, RPL27, CPEB1, RRP9, PPIL1, PPIH, RPL17, POLR2L, RPL36, LGALS3, EXOSC8, EXOSC6, CELF5, RPL39, THG1L, SNRPG, RPL30, RPS2, SNRPD2, RPL18, RPL38, RPS19, ADARB2, CDKAL1, RPL…	1966	910	16130	1.37042	0.00116413	0.0011009
GOTERM_BP	GO:0051279~regulation of release of sequestered calcium ion into cytosol	23	3.56164e-05	-4.44835	CLIC2, F2R, NOS1, AKAP6, CACNA1C, JPH1, HTT, THY1, PTPN6, PRKCE, SRI, MYO5A, JPH3, DMD, CORO1A, TRPC1, PTK2B, SLC8A1, BAX, LYN, NTSR1, CYBA, DRD1	1966	73	16130	2.58497	0.00117353	0.00110978
GOTERM_BP	GO:0006812~cation transport	161	3.61757e-05	-4.44158	F2R, FGF13, SLC17A6, CACNA2D1, CHRNA2, MYO5A, CACNA2D2, TRPV4, DENND5B, KCNK3, KCNJ12, MMP9, PKD1L2, NCS1, CHRNB3, TMEM63C, CACNA1I, CALHM6, SCN2B, SCN10A, CACNA1F, EHD3, DDIT3, AMIGO1, CLIC2, CACNA1A, GRIN2C, SLC8A2, TMCO1, CACNA1E, SLC10A7, OPRM1, CNNM4, JPH3, CORO1A, KCNJ10, ATP13A2, LYN, SLC23A2, KCNB2, CHP1, KCNH7, HCN1, CRHR1, RHBG, KCNA2, GLRX, KCNJ9, ATP6V1E1, MCOLN2, LGALS3, KCNE4, FKBP4…	1966	975	16130	1.35479	0.00118441	0.00112007
GOTERM_BP	GO:0045055~regulated exocytosis	60	3.70557e-05	-4.43114	DNAJC5, STX11, UNC13A, STXBP2, SYT3, BCR, PLEK, STXBP1, RIMS3, BRPF3, CACNA1I, SERPINE1, VEGFA, HMOX1, CACNA1A, PECAM1, SYT16, ABR, ADGRL1, DOC2A, SYNJ1, PCLO, CPLX2, SYT14, BTK, CORO1A, NAPB, PIP5K1C, LYN, RAB11FIP2, CHP1, SRGN, ABCC4, RAP1B, SNAP47, F13A1, PIK3CG, STX1B, FN1, TMED10, UNC13D, RIMS1, SYT2, RPH3A, HCK, GAB2, NAPA, SCAMP5, RAC2, RAB3A, APP, VEGFB, BRAF, RAB11FIP5, FLNA, SYT7, PCDH7…	1966	288	16130	1.70927	0.00120559	0.0011401
GOTERM_BP	GO:0008016~regulation of heart contraction	51	4.09228e-05	-4.38803	FGF13, CACNA2D1, APLN, CACNA2D2, DMD, ADRA1B, KCNK3, ADM, KCNJ12, CACNB1, ATP1B1, SCN2B, SCN10A, CACNA1F, EHD3, CLIC2, NOS1, SLC8A2, SREBF1, SRI, CACNA1D, CHRM2, NOS1AP, SPTBN4, CACNB2, TMEM65, CACNB3, THRA, PIK3CG, HDAC4, DSP, CAV1, MEF2A, KCNIP4, EDN2, RANGRF, TBX2, CACNA1C, ADRB1, GSK3A, CACNA2D4, CACNA2D3, RYR1, HCN4, FLNA, GNAO1, TRPC1, SLC8A3, ATP2B2, SLC8A1, ATP1A1	1966	233	16130	1.79583	0.00132309	0.00125122
GOTERM_BP	GO:0043434~response to peptide hormone	78	4.16918e-05	-4.37995	STC2, NAMPT, PRKAR1A, ATP6V0E1, ANXA1, MYO5A, HADH, DAG1, TRPV4, BAIAP2, ADM, STAT3, TIMP4, SHC1, SOCS2, CDC6, JUND, CISH, GNG5, SREBF1, CRY1, SIK2, PID1, LPIN1, PRKCZ, YWHAG, GNB4, RAB13, IGFBP5, EIF4EBP1, CAMK2A, PKLR, LYN, PPARA, ADCY1, RAP1B, CRHR1, ATP6AP1, CPEB1, CAV1, NGFR, UCP2, RPE65, CPEB2, GNG7, ATP6V1E1, PDK2, MYC, MYO1C, MT-CYB, PRKAR2B, CYBB, RAB8A, ZFP36L1, HDAC5, TRIB3, SOCS1, TCI…	1966	405	16130	1.58012	0.00133957	0.00126681
GOTERM_BP	GO:0060998~regulation of dendritic spine development	20	4.34075e-05	-4.36244	CPEB3, PPP1R9A, APOE, NEURL1, ZMYND8, TIAM1, CUX2, MTOR, SIPA1L1, NGEF, CDK5R1, PTEN, BAIAP2, SHANK3, LRP8, CAMK1, SRCIN1, KALRN, CAMK2B, PLK2	1966	59	16130	2.78118	0.00138609	0.0013108
GOTERM_BP	GO:0099643~signal release from synapse	35	4.56738e-05	-4.34033	DNAJC5, STX11, UNC13A, SYT3, PPP1R9A, LIN7B, STX1B, STXBP1, RIMS3, RIMS1, SYT2, RPH3A, PTPRN2, NAPA, GAD1, CACNA1A, RAB3A, SYT16, NF1, BRAF, ADGRL1, DOC2A, SYNJ1, SYT7, PCLO, CPLX2, SYT14, APBA1, PPFIA4, NAPB, PIP5K1C, PRKN, DOC2B, RAP1B, SNAP47	1966	139	16130	2.06588	0.00144067	0.00136241
GOTERM_BP	GO:0007269~neurotransmitter secretion	35	4.56738e-05	-4.34033	DNAJC5, STX11, UNC13A, SYT3, PPP1R9A, LIN7B, STX1B, STXBP1, RIMS3, RIMS1, SYT2, RPH3A, PTPRN2, NAPA, GAD1, CACNA1A, RAB3A, SYT16, NF1, BRAF, ADGRL1, DOC2A, SYNJ1, SYT7, PCLO, CPLX2, SYT14, APBA1, PPFIA4, NAPB, PIP5K1C, PRKN, DOC2B, RAP1B, SNAP47	1966	139	16130	2.06588	0.00144067	0.00136241
GOTERM_BP	GO:0010648~negative regulation of cell communication	189	4.95645e-05	-4.30483	LRRC4, NUP62, PPP2R3A, HYAL2, PTPRJ, LTBP1, SULF2, PLEK, PSMB4, LZTS2, GSK3B, HADH, SPRY1, ADM, PFDN5, MMP9, RAB11FIP3, IQSEC2, FBXW7, CPNE1, HECW1, KLF4, DDIT3, CLIC2, APOE, TGFBR1, HMOX1, TSKU, DUSP22, CISH, MDFI, BCL2L10, PRELID1, WWC1, LRRTM4, OPRM1, FST, PID1, SLC6A1, NF1, SCAI, PRKCZ, MMP14, CREBRF, PPM1A, RHOH, UBA52, LRRC4B, OTUD7A, LYN, CHP1, HMGB2, DNAJA1, RAP1B, AP006333.1, PSMA2, NEUR…	1966	1182	16130	1.31188	0.00155392	0.00146951
GOTERM_BP	GO:0050801~ion homeostasis	121	5.04715e-05	-4.29695	F2R, GPR12, HYAL2, CACNA2D1, MYO5A, TRPV4, ADRA1B, KCNK3, ADM, TBXAS1, CXCR4, SCN2B, SCN10A, GPR18, DDIT3, CLIC2, APOE, HMOX1, CACNA1A, SLC8A2, TMCO1, OPRM1, CNNM4, JPH3, F2RL2, PIK3CB, CORO1A, KCNJ10, ATP13A2, DMXL2, LYN, CHP1, SLC4A3, CCR9, ATP6V1E1, MYC, HIF1A, EDN2, SLC30A7, TCIRG1, TMEM178A, NEO1, CACNA1C, HTT, APP, ATP6V1G1, RYR1, SLC9A7, TRPC1, EDNRA, SLC4A2, SLC8A1, NDFIP1, HMGB1, GNA13, …	1966	699	16130	1.42023	0.00157282	0.00148739
GOTERM_BP	GO:0034622~cellular macromolecular complex assembly	164	5.48724e-05	-4.26065	CAPG, UBE2C, ARPC5, FGF13, ANP32B, MAP7D3, ZFYVE9, MAPK8IP2, RTN4, TRPV4, BAIAP2, MIS12, RPL13A, VMA21, TMED2, ARPC1B, PRMT5, EFNA5, EIF3H, WAS, SF3A2, ARPC3, SPTBN1, LSM3, PTBP2, MSRB1, RPS15, ABI2, MRPL11, ATPAF2, RPSA, SYNJ1, TOMM20, GEMIN7, PPM1A, CORO1A, UBA52, DMXL2, CDC42EP5, RPS14, HMGB2, SNRPC, SNAP47, ADD1, RPA3, RPS3, CATIP, RPL23A, NDUFA10, MT-ND2, MT-ND4, DDB2, MT-ND1, TWF1, CDC42EP4…	1966	1004	16130	1.34017	0.00169785	0.00160562
GOTERM_BP	GO:0051495~positive regulation of cytoskeleton organization	43	5.514e-05	-4.25853	RPS3, ROCK2, SEMA5A, HCLS1, ARPC5, SMAD3, CYFIP1, NTRK3, ACTR3B, PLEK, TRPV4, MYO1C, BAIAP2, CDC42EP4, BCAS3, CORO1B, NCKAP1, SORBS3, PTK2B, ID1, ARPC1B, HCK, PLXNA3, MAPT, PPM1E, PICK1, TGFBR1, WAS, PFN1, MTOR, ARPC3, PRKCE, ABI2, BRAF, NCK1, DCTN1, IQGAP2, CORO1A, GPR65, WASF1, RICTOR, VASP, CDC42EP5	1966	187	16130	1.88659	0.00169785	0.00160562
GOTERM_BP	GO:0086001~cardiac muscle cell action potential	21	5.74136e-05	-4.24099	CACNA1C, DSP, CAV1, FGF13, ANK3, CACNA2D1, CACNA1D, FGF12, DMD, HCN4, NEDD4L, FLNA, SLMAP, NOS1AP, SLC8A1, ATP1B1, SCN10A, SCN2B, RANGRF, ATP1A1, CACNB2	1966	65	16130	2.65068	0.0017574	0.00166194
GOTERM_BP	GO:0008064~regulation of actin polymerization or depolymerization	40	6.14052e-05	-4.21179	CAPG, SEMA5A, PPP1R9A, HCLS1, ARPC5, SPTAN1, CYFIP1, ACTR3B, PLEK, TWF1, FHOD3, MYO1C, BAIAP2, CDC42EP4, TMOD3, CORO1B, NCKAP1, SSH1, PTK2B, ARPC1B, HCK, LIMA1, PICK1, WAS, PFN1, MTOR, ARPC3, PRKCE, SPTBN1, ABI2, SPTBN2, NCK1, IQGAP2, SPTBN4, CORO1A, WASF1, RICTOR, VASP, CDC42EP5, ADD1	1966	170	16130	1.93046	0.00186853	0.00176703
GOTERM_BP	GO:0010469~regulation of receptor activity	32	6.2486e-05	-4.20422	NEURL1, DLG4, CAV1, JPH1, CNIH2, ANXA2, SRA1, MAPK8IP2, MYO5A, ZFYVE28, DMD, SHANK3, SHC1, PTK2B, FBXW7, BUD31, SERPINE1, CLIC2, NOS1, AKAP6, HTT, DAPK1, PRKCE, APP, SRI, PPARGC1B, OPRM1, JPH3, NCOA2, NLGN2, RASGRF1, MINK1	1966	124	16130	2.11728	0.00189029	0.00178761
GOTERM_BP	GO:0000028~ribosomal small subunit assembly	11	6.93337e-05	-4.15906	RPSA, RPS28, RPS27L, RPS10, RRP7A, RPS5, RPL38, RPS19, RPS14, RPS15, RPS17	1966	21	16130	4.29758	0.00208525	0.00197198
GOTERM_BP	GO:0030832~regulation of actin filament length	40	7.03579e-05	-4.15269	CAPG, SEMA5A, PPP1R9A, HCLS1, ARPC5, SPTAN1, CYFIP1, ACTR3B, PLEK, TWF1, FHOD3, MYO1C, BAIAP2, CDC42EP4, TMOD3, CORO1B, NCKAP1, SSH1, PTK2B, ARPC1B, HCK, LIMA1, PICK1, WAS, PFN1, MTOR, ARPC3, PRKCE, SPTBN1, ABI2, SPTBN2, NCK1, IQGAP2, SPTBN4, CORO1A, WASF1, RICTOR, VASP, CDC42EP5, ADD1	1966	171	16130	1.91918	0.00210382	0.00198954
GOTERM_BP	GO:0097421~liver regeneration	13	7.25986e-05	-4.13907	HAMP, PCNA, PTPN3, HMOX1, TYMS, SULF2, UCP2, CEBPB, MYC, RPS16, RPL19, PRMT5, EZH2	1966	29	16130	3.67787	0.00215835	0.0020411
GOTERM_BP	GO:0046879~hormone secretion	60	7.57041e-05	-4.12088	ANXA1, APLN, MYO5A, HADH, CACNA2D2, TRPV4, ADM, ARHGEF7, C1QTNF1, SLC25A5, OXCT1, FOXL2, RAB11FIP3, PTPRN2, VIP, EFNA5, SMPD3, TIAM1, GLUD1, CACNA1A, SREBF1, CRY1, SRI, CACNA1D, CACNA1E, SOX11, PCLO, HMGCR, BTK, NLGN2, PRKN, LYN, SOX4, RAB11FIP2, CRHR1, UCP2, SIRT3, PRKCA, C2CD2L, ARRB1, CLOCK, PDE8B, AACS, PCK2, HIF1A, CACNA1C, PER2, MIDN, PRKCE, RAB11FIP5, VSNL1, SYT7, SERP1, GPR68, STXBP4, KIF…	1966	295	16130	1.66871	0.00223781	0.00211625
GOTERM_BP	GO:0006873~cellular ion homeostasis	104	7.85987e-05	-4.10458	F2R, GPR12, CACNA2D1, MYO5A, TRPV4, ADRA1B, KCNK3, ADM, TBXAS1, CXCR4, GPR18, DDIT3, CLIC2, APOE, HMOX1, CACNA1A, SLC8A2, TMCO1, OPRM1, JPH3, F2RL2, PIK3CB, CORO1A, ATP13A2, DMXL2, LYN, CHP1, SLC4A3, CCR9, ATP6V1E1, MYC, HIF1A, EDN2, SLC30A7, TCIRG1, TMEM178A, CACNA1C, HTT, APP, ATP6V1G1, RYR1, SLC9A7, TRPC1, EDNRA, SLC4A2, SLC8A1, NDFIP1, HMGB1, GNA13, ATP1A1, CYBA, ABL2, CD4, STC2, DLG4, SMAD3,…	1966	588	16130	1.45113	0.00231018	0.00218469
GOTERM_BP	GO:0086010~membrane depolarization during action potential	17	8.12718e-05	-4.09006	CACNA1C, CACNA1A, ANK3, CACNA2D1, CACNA1D, CACNA1E, SCN8A, HCN4, SLMAP, SLC8A1, CACNA1I, SCN10A, SCN2B, RANGRF, CACNB2, NALCN, CACNA1F	1966	47	16130	2.96758	0.00237525	0.00224622
GOTERM_BP	GO:1903047~mitotic cell cycle process	147	8.18325e-05	-4.08707	CTC1, GTSE1, UBE2C, NUP62, PINX1, PSMB4, ANXA1, LZTS2, ODF2, PRC1, ZNF365, CKS1B, CDK4, SPRY1, MIS12, NUP35, NEK6, MCM8, CCNY, CDC6, TFDP1, VCPIP1, SH2B1, NUP37, SPTBN1, PID1, WEE1, EIF4EBP1, SEPTIN2, UBA52, MAD2L1, MCM5, CHEK2, AAAS, RPA3, RPTOR, RPS3, PSMA2, NUDC, CDK6, MCM6, GPNMB, PSMB10, PRKCA, ANAPC11, RAD51B, RAB8A, EZH2, PLCB1, MYBL2, PLK2, PHB2, ZWILCH, HTT, NCAPD2, RPA2, APP, APC, DIS3L…	1966	890	16130	1.35512	0.0023782	0.00224901
GOTERM_BP	GO:0007015~actin filament organization	66	8.67634e-05	-4.06166	CAPG, ROCK2, FRY, PPP1R9A, SPTAN1, ARPC5, SMAD3, ACTR3B, PLEK, MICAL3, RHOF, TRPV4, BAIAP2, TMOD3, ID1, ARPC1B, LIMA1, TGFBR1, WAS, ARPC3, PPP1R9B, SPTBN1, PPARGC1B, MSRB1, ABI2, SORBS2, SPTBN2, WASF2, SPTBN4, CORO1A, GPR65, PRKN, CDC42EP5, ADD1, CATIP, SEMA5A, HCLS1, CYFIP1, TWF1, ARRB1, FHOD3, MYO1C, CDC42EP4, SHANK3, NCKAP1, SORBS3, CORO1B, PTK2B, HCK, PPM1E, PICK1, PFN1, MTOR, RAC2, PRKCE, LC…	1966	335	16130	1.6164	0.00250741	0.00237121
GOTERM_BP	GO:0061387~regulation of extent of cell growth	28	9.13542e-05	-4.03927	SEMA5A, FGF13, NTRK3, SEMA6B, GSK3B, FN1, IFRD1, SEMA4F, RTN4, BMPR2, DPYSL2, SEMA4G, PLXNA3, MAPT, EFNA5, VEGFA, APOE, TRPC5, SEMA3F, PLXNA2, MEGF8, L1CAM, CDK5R1, PLXNA1, CDKL5, RGMA, RND2, GOLGA4	1966	104	16130	2.2089	0.00262542	0.0024828
GOTERM_BP	GO:0042273~ribosomal large subunit biogenesis	21	9.23334e-05	-4.03464	RPL35A, RPL23A, NIP7, YAE1, SDAD1, NOP2, RPL10A, EIF6, RPL35, MRPL11, RPL12, RPF1, RPL7, RPL24, RPL6, SNU13, RPL5, RPL38, RPL10, RPL11, RPL14	1966	67	16130	2.57155	0.0026389	0.00249555
GOTERM_BP	GO:0010522~regulation of calcium ion transport into cytosol	25	9.58337e-05	-4.01848	F2R, CAV1, JPH1, PTPN6, MYO5A, DMD, PTK2B, BAX, DRD1, CLIC2, NOS1, AKAP6, CACNA1C, HTT, THY1, PRKCE, SRI, JPH3, CORO1A, TRPC1, SLC8A1, LYN, NTSR1, CYBA, CD4	1966	88	16130	2.33082	0.00272389	0.00257593
GOTERM_BP	GO:0051223~regulation of protein transport	126	0.000105497	-3.97676	GTSE1, F2R, NUP62, HYAL2, ANP32B, SULF2, CD276, ANXA1, GSK3B, HADH, CACNA2D2, TRPV4, DNAJC1, STING1, CAMK1, RAB11FIP3, FBXW7, EFNA5, TGFBR1, UHMK1, CACNA1A, MDFI, SPTBN1, CACNA1E, OPRM1, GOPC, NF1, GPR26, PRKCZ, CREBRF, PPM1A, NLGN2, ATP13A2, LYN, STXBP5, CHP1, DNAJA1, ACTL6A, SEMA5A, SIRT3, C2CD2L, PRKCA, CLOCK, MIEF2, SH3TC2, PCK2, HIF1A, RAB8A, SOCS1, CNST, CACNA1C, PER2, RAC2, MIDN, SNX3, ELM…	1966	746	16130	1.38574	0.00298216	0.00282017
GOTERM_BP	GO:0060079~excitatory postsynaptic potential	18	0.000114535	-3.94106	PPP1R9A, DLG4, CUX2, SLC17A7, GRIN2C, STX1B, MAPK8IP2, NPAS4, OPRM1, PTEN, PRKCZ, SHANK3, PTK2B, NETO1, MECP2, NLGN2, RIMS1, GRIN2A	1966	53	16130	2.78643	0.00321424	0.00303964
GOTERM_BP	GO:0006915~apoptotic process	263	0.00011495	-3.93949	F2R, DAD1, NUP62, KRAS, EGR3, IKBKE, FGFR2, GSK3B, ARHGEF9, CDK4, NEK6, FOXL2, CXCR4, AIFM3, MAPK8, APOE, TGFBR1, DUSP22, BCL11B, BCL2L10, PRELID1, AMBRA1, UNC5A, NF1, LAMTOR5, THOC6, NET1, FGD4, BTK, CORO1A, MAD2L1, HMGB2, DNAJA1, CHEK2, RPS3, STK40, SEMA5A, TLE5, RASGRF2, HSPA5, PLEKHG5, PAK6, MYC, LGALS3, NISCH, NCOA1, ANXA5, NCKAP1, G0S2, HCK, HIPK2, RPS6KA2, HTT, SPI1, DAPK1, VEGFB, APP, FAD…	1966	1747	16130	1.23513	0.00321424	0.00303964
GOTERM_BP	GO:0030041~actin filament polymerization	37	0.000116907	-3.93216	CAPG, CATIP, HCLS1, ARPC5, SPTAN1, CYFIP1, ACTR3B, TWF1, FHOD3, MYO1C, BAIAP2, CDC42EP4, TMOD3, CORO1B, NCKAP1, PTK2B, ARPC1B, HCK, PICK1, WAS, PFN1, MTOR, ARPC3, PRKCE, SPTBN1, MSRB1, ABI2, SPTBN2, NCK1, IQGAP2, SPTBN4, CORO1A, WASF1, RICTOR, VASP, CDC42EP5, ADD1	1966	157	16130	1.93354	0.00324665	0.00307029
GOTERM_BP	GO:0051588~regulation of neurotransmitter transport	20	0.000117881	-3.92856	NOS1, UNC13A, PPP1R9A, PER2, NAPA, CACNA1A, RAB3A, STX1B, SNCG, BRAF, NF1, STXBP1, RIMS3, RAB3B, CAMK2A, RIMS1, NAPB, PRKN, RAP1B, DRD1	1966	63	16130	2.6046	0.00324665	0.00307029
GOTERM_BP	GO:0009914~hormone transport	61	0.000117992	-3.92815	ANXA1, APLN, MYO5A, HADH, CACNA2D2, TRPV4, ADM, ARHGEF7, C1QTNF1, SLC25A5, OXCT1, FOXL2, RAB11FIP3, PTPRN2, VIP, EFNA5, SMPD3, TIAM1, GLUD1, CACNA1A, SREBF1, CRY1, SRI, CACNA1D, CACNA1E, SOX11, PCLO, HMGCR, SLC16A10, BTK, NLGN2, PRKN, LYN, SOX4, RAB11FIP2, CRHR1, UCP2, SIRT3, PRKCA, C2CD2L, ARRB1, CLOCK, PDE8B, AACS, PCK2, HIF1A, CACNA1C, PER2, MIDN, PRKCE, RAB11FIP5, VSNL1, SYT7, SERP1, GPR68, S…	1966	306	16130	1.63553	0.00324665	0.00307029
GOTERM_BP	GO:0043408~regulation of MAPK cascade	116	0.000119945	-3.92102	F2R, NUP62, HYAL2, PTPRJ, KRAS, FGFR2, MAPK8IP2, MAP3K9, TRPV4, ADRA1B, SPRY1, CXCR4, RRAS, FBXW7, RAP2A, GPR183, PRMT5, KLF4, VEGFA, APOE, TGFBR1, DUSP22, MAPKAPK3, MDFI, WWC1, OPRM1, NF1, PRKCZ, PIK3CB, UBA52, LYN, DNAJA1, RAP1B, RPS3, STK40, MAPK10, NGFR, GPNMB, SIRT3, PRKCA, MYC, EZH2, PLCB1, MAP4K5, PHB2, HIPK2, VEGFB, MYD88, CCN1, CIB1, C1QL4, IGFBP3, HMGB1, IQGAP1, MYDGF, RAPGEF2, PTPN6, M…	1966	678	16130	1.40372	0.00328294	0.00310461
GOTERM_BP	GO:0006897~endocytosis	114	0.000127751	-3.89364	CANX, ACKR4, EHD2, ARPC5, ANXA2, ZFYVE9, ANXA1, ICAM3, DENND1A, BAIAP2, ADM, NECAP2, LRP8, ARPC1B, ITGB2, NPC1, PDIA6, PSTPIP1, VEGFA, APOE, WAS, MAPKAPK3, ARPC3, APOC1, SYNJ1, PIK3CB, CORO1A, RAB22A, PIP5K1C, LYN, LRP1B, SELE, USP20, AAK1, MRC1, CNN2, LGALS3, ANXA11, PTX3, NCKAP1, SYT2, DPYSL2, HCK, FNBP1, EPS15L1, NME1, ACTG1, RAMP2, DNM1, APP, SNX3, SUSD2, AP2B1, NCK1, CYFIP2, FGR, RIN3, HMGB1…	1966	665	16130	1.40648	0.00347818	0.00328924
GOTERM_BP	GO:0070201~regulation of establishment of protein localization	136	0.000129197	-3.88875	GTSE1, F2R, NUP62, HYAL2, ANP32B, RER1, SULF2, CD276, ANXA1, GSK3B, HADH, CACNA2D2, TRPV4, DNAJC1, STING1, CAMK1, RAB11FIP3, FBXW7, EFNA5, MAPK8, TFDP1, TGFBR1, UHMK1, CACNA1A, MDFI, SPTBN1, CACNA1E, OPRM1, PID1, GOPC, NF1, GPR26, PRKCZ, CREBRF, PPM1A, NLGN2, ATP13A2, LYN, STXBP5, CHP1, DNAJA1, ACTL6A, SEMA5A, SIRT3, C2CD2L, PRKCA, CLOCK, MIEF2, SH3TC2, PCK2, HIF1A, RAB8A, SOCS1, CNST, CACNA1C, P…	1966	820	16130	1.36074	0.00349914	0.00330907
GOTERM_BP	GO:0030833~regulation of actin filament polymerization	36	0.00013223	-3.87867	CAPG, PPP1R9A, HCLS1, ARPC5, SPTAN1, CYFIP1, ACTR3B, TWF1, FHOD3, MYO1C, BAIAP2, CDC42EP4, TMOD3, CORO1B, NCKAP1, PTK2B, ARPC1B, HCK, PICK1, WAS, PFN1, MTOR, ARPC3, PRKCE, SPTBN1, ABI2, SPTBN2, NCK1, IQGAP2, SPTBN4, CORO1A, WASF1, RICTOR, VASP, CDC42EP5, ADD1	1966	152	16130	1.94317	0.00356264	0.00336912
GOTERM_BP	GO:0031532~actin cytoskeleton reorganization	21	0.000144864	-3.83904	FRY, ATP2C1, HCLS1, CDC42BPB, NTRK3, PLEK, PARVG, ANXA1, SIPA1L1, TRPV4, PRKCZ, BAIAP2, BCAS3, FLNA, CDC42BPA, SHC1, GPR65, HCK, RICTOR, MINK1, RAP2A	1966	69	16130	2.49701	0.0038628	0.00365297
GOTERM_BP	GO:0001938~positive regulation of endothelial cell proliferation	21	0.000144864	-3.83904	SEMA5A, VEGFA, MYDGF, TGFBR1, STAT5A, MTOR, EGR3, PLXNB3, VEGFB, PRKCA, NF1, ACVRL1, BMPR2, EGFL7, BMP2, HIF1A, RICTOR, PPP1R16B, HMGB2, CYBA, RPTOR	1966	69	16130	2.49701	0.0038628	0.00365297
GOTERM_BP	GO:0001649~osteoblast differentiation	43	0.000149569	-3.82516	ATP6AP1, HDAC4, FIGNL1, CDK6, SMAD3, GLI2, SMAD5, CD276, RORB, GPNMB, PHB, ID3, CBFB, FAM20C, TNC, BMP3, CEBPB, PDLIM7, BMPR2, BMP2, ACVR2A, ID1, CTHRC1, DDR2, ACHE, FBL, JUND, MYBBP1A, RPS15, CLIC1, NF1, SOX11, HSPE1, RIOX1, NPNT, CCN1, FASN, IGFBP5, ERH, PSMC2, IGFBP3, CEBPD, RPS11	1966	195	16130	1.80919	0.00396781	0.00375227
GOTERM_BP	GO:0031345~negative regulation of cell projection organization	36	0.000151712	-3.81898	SEMA5A, RAPGEF2, FGF13, RAP1GAP, NGFR, SEMA6B, STX1B, NGEF, GSK3B, IFRD1, SEMA4F, PTEN, TRPV4, RTN4, FKBP4, TBC1D30, LINGO1, ID1, INPP5J, SEMA4G, PLXNA3, PLK2, CEP97, APOE, TRPC5, SEMA3F, THY1, DGUOK, PLXNB3, CDK5R1, SPOCK1, DAB1, CIB1, RGMA, EVI5L, GDI1	1966	153	16130	1.93046	0.00398379	0.00376739
GOTERM_BP	GO:1902806~regulation of cell cycle G1/S phase transition	36	0.000151712	-3.81898	PSME1, GTSE1, PTPN6, CNOT9, NPM1, GPNMB, ANXA1, PTEN, DGKZ, TCIM, BAX, FBXW7, PLCB1, EZH2, CDC6, TP53, PHB2, PLK2, TCF3, FBXO31, TFDP1, PCNA, GADD45A, RPA2, PID1, SUSD2, MYO16, STXBP4, RPS27L, E2F7, UBA52, TERT, RBM38, SOX4, CHEK2, RPTOR	1966	153	16130	1.93046	0.00398379	0.00376739
GOTERM_BP	GO:0061001~regulation of dendritic spine morphogenesis	13	0.000156274	-3.80611	PPP1R9A, TIAM1, CUX2, SIPA1L1, NGEF, CDK5R1, PTEN, BAIAP2, SHANK3, LRP8, SRCIN1, KALRN, CAMK2B	1966	31	16130	3.44059	0.00408286	0.00386108
GOTERM_BP	GO:0032273~positive regulation of protein polymerization	29	0.000191681	-3.71742	RPS3, ARPC5, CYFIP1, ACTR3B, TPPP, MYO1C, BAIAP2, CDC42EP4, CORO1B, NCKAP1, PTK2B, ARPC1B, HCK, MAPT, PICK1, WAS, PFN1, MTOR, ARPC3, PRKCE, ABI2, NCK1, DCTN1, IQGAP2, CORO1A, WASF1, RICTOR, VASP, CDC42EP5	1966	114	16130	2.0871	0.00498275	0.00471208
GOTERM_BP	GO:0048639~positive regulation of developmental growth	37	0.000199361	-3.70036	SEMA5A, HAMP, UNC13A, WT1, SYT3, NTRK3, FGFR2, HLX, GSK3B, FN1, CACNA2D2, BMPR2, PPIB, RIMS1, SYT2, MAPT, PLCB1, CPNE5, TBX2, EFNA5, VEGFA, AKAP6, TRPC5, MTOR, MEGF8, L1CAM, ERBB4, NEDD4L, YAP1, SERP1, CDKL5, SPTBN4, TGFBR2, PRKN, CPNE9, RND2, GOLGA4	1966	161	16130	1.8855	0.00515646	0.00487636
GOTERM_CC	GO:0005829~cytosol	620	4.94393e-28	-27.3059	PI4KA, ARPC5, IKBKE, PLEK, LCP2, SMAD5, NCBP2, GSK3B, UBXN2A, ARHGEF9, PRC1, CDK4, DNAJC1, POLR3D, RAB11FIP3, PRMT5, ARHGAP39, CDC6, EIF3H, KPNA6, CISH, MAPKAPK3, SH2B1, PNO1, ARPC3, NUP37, BCL2L10, GMNN, AMBRA1, WWC1, ADPRM, LAMTOR5, NF1, NET1, RPSA, BTK, CORO1A, ARHGAP22, TNRC6C, ADI1, RPL19, RPL21, DNAJA1, FRMPD1, ADD1, HERC4, CDK6, RASGRF2, PLEKHG5, STX1B, NCF2, DTYMK, GNPDA1, MYC, NOTCH3, NI…	1947	3399	15514	1.45344	4.20234e-25	3.75739e-25
GOTERM_CC	GO:0044444~cytoplasmic part	1234	4.25151e-27	-26.3715	F2R, SYT3, PI4KA, IKBKE, LMAN2L, ST6GALNAC6, LCP2, SMAD5, NCBP2, UBXN2A, ARHGEF9, CDK4, DNAJC1, SHOC2, TNFSF13B, AIFM3, CDC6, EIF3H, KPNA6, CISH, ACP6, MAPKAPK3, FGD6, SH2B1, ARPC3, THBS3, BCL2L10, GMNN, PRELID1, WWC1, ADPRM, MMP14, TOMM20, SEPTIN2, RPL19, CLPP, TIMM9, FRMPD1, CHEK2, ADD1, AP006333.1, DGKH, CPEB1, CDK6, HSPA5, SLC35D1, NCF2, DTYMK, MYC, MT-CO1, NOTCH3, NISCH, ANXA11, SH3TC2, G0S2…	1947	8090	15514	1.21541	1.80689e-24	1.61557e-24
GOTERM_CC	GO:0005737~cytoplasm	1543	1.39017e-25	-24.8569	SYT3, NUP62, PI4KA, LMAN2L, ST6GALNAC6, SMAD5, NCBP2, ARHGEF9, CDK4, PALMD, DNAJC1, TNFSF13B, IQSEC2, CDC6, KPNA6, SH2B1, GMNN, PARVG, THBS3, PRELID1, WWC1, ADPRM, MMP14, TOMM20, SEPTIN2, RPL19, CLPP, ADD1, AP006333.1, HSPA5, SLC35D1, NCF2, DTYMK, NISCH, SHANK3, SH3TC2, CHCHD10, NCF4, BTBD6, NME1, MAP4K5, DENND11, PPTC7, APP, NMD3, SNX3, DOP1B, FGR, PTPRN, ATXN1, LRPAP1, RPL10, EIF3D, RREB1, ZDHH…	1947	10775	15514	1.14105	3.93882e-23	3.52176e-23
GOTERM_CC	GO:0022626~cytosolic ribosome	63	4.39451e-24	-23.3571	RPS8, RPS13, RPLP2, RPS7, RPL13A, RPL9, RPS21, RPS9, RPS16, RPL34, RPL13, RPL23, RPS15, RPL35, FAU, RPSA, RPS28, RPL12, RPS6, UBA52, SNU13, RPS18, RPL19, RPL29, RPS14, RPL21, RPS11, RPL35A, RPS3, RPL23A, RPL27, RPS12, RPL17, RPL37A, RPL36, RPL39, RPL22L1, RPS10, RPL6, RPL30, RPS2, RPS23, RPL18, RPL38, RPS19, RPL14, RPLP1, RPS4X, RPS25, RPS5, RPL4, RPL10A, RPS3A, RPL7, RPL24, RPS27L, RPL5, RPLP0, …	1947	125	15514	4.01595	9.33832e-22	8.34956e-22
GOTERM_CC	GO:0044391~ribosomal subunit	77	4.33851e-22	-21.3627	MRPL52, RPS8, RPS13, RPLP2, RPS7, RPL13A, RPL9, RPS21, RPS9, MRPL39, RPS16, RPL34, RPL13, RPL23, MRPL23, RPS15, RPL35, MRPL11, FAU, RPSA, RPS28, RPL12, RPS6, UBA52, SNU13, RPS18, MRPL32, RPL19, RPL29, RACK1, RPS14, RPL21, RPS11, RPL35A, RPS3, DAP3, MRPL13, MRPL35, RPL23A, RPL27, MRPL49, RPS12, RPL17, RPL37A, MRPL3, RPL36, RPL39, RPL22L1, RPS10, RPL6, RPL30, RPS2, RPS23, RPL18, RPL38, RPS19, MRPS6…	1947	189	15514	3.24629	7.37547e-20	6.59454e-20
GOTERM_CC	GO:0005925~focal adhesion	118	1.70241e-20	-19.7689	ARPC5, PI4KA, KRAS, RPS8, RPS13, ANXA1, TRPV4, RPL13A, RPS16, RRAS, ARPC1B, LPP, EHD3, ARPC3, PARVG, OPRM1, RPS15, CD99, MMP14, PIP5K1C, ARHGAP22, RPL19, SYNE2, CHP1, RPS14, RPS11, ADD1, AP006333.1, RPS3, RPL27, PDLIM1, HSPA5, CNN3, TNC, TWF1, CNN2, TES, ANXA5, NCKAP1, IRF2, RPL30, RPS2, HCK, RPL18, DDR2, FBLIM1, RPL38, RPS19, ACTG1, CAPN5, PFN1, RAC2, RPS5, L1CAM, RPL4, RPL10A, LPXN, WASF1, RPL5…	1947	391	15514	2.40471	2.41175e-18	2.15639e-18
GOTERM_CC	GO:0005840~ribosome	88	8.81143e-20	-19.055	CANX, MRPL52, RPS8, RPS13, RPLP2, RPS7, RPL13A, RPL9, RPS21, RPS9, MRPL39, RPS16, RPL34, RPL13, PRMT3, RPL23, MRPL23, TMA16, RPS15, RPL35, MRPL11, FAU, RPSA, RPS28, RPL12, RPS6, UBA52, SNU13, RPS18, MRPL32, RPL19, RPL29, RACK1, RPS14, RPL21, RPS11, RPL35A, RPS3, DAP3, MRPL13, MRPL35, RPL23A, RPL27, MRPL40, MRPL49, RPS12, RPL17, RPL37A, RPS6KL1, MRPL3, RPL36, RPL39, RPL22L1, RPS10, RPL6, RPL30, RP…	1947	253	15514	2.77153	1.06996e-17	9.56669e-18
GOTERM_CC	GO:0022625~cytosolic large ribosomal subunit	36	8.67354e-15	-14.0618	RPL35A, RPL23A, RPL27, RPL17, RPL37A, RPLP2, RPL36, RPL13A, RPL9, RPL22L1, RPL39, RPL6, RPL30, RPL18, RPL34, RPL38, RPL13, RPL14, RPL23, RPLP1, RPL4, RPL10A, RPL35, RPL12, RPL7, RPL24, SNU13, UBA52, RPL5, RPL19, RPLP0, RPL29, RPL10, RPL21, RPL11, RPL18A	1947	68	15514	4.21844	9.21564e-13	8.23987e-13
GOTERM_CC	GO:0030425~dendrite	119	1.84844e-14	-13.7332	CANX, LRRC4, FGF13, KIRREL3, GSK3B, DENND1A, GRIP1, BAIAP2, PALMD, LRP8, PCDH8, NCS1, AMIGO1, APOE, UHMK1, CACNA1A, SLC8A2, CHRM2, OPRM1, GOPC, NF1, CPLX2, KCNB2, BRINP1, HCN1, SNAP47, RPTOR, KCNA2, NEURL1, CPEB1, CNN3, SIPA1L1, MT-ND1, SHANK3, CYBB, RAB8A, DPYSL2, PLK2, CHRM3, ZMYND8, HTT, IGSF9B, APP, GRM2, CDK5R1, GPHN, GNAO1, CIB1, PDYN, SRCIN1, SLC8A1, RPLP0, CYBA, KCNC1, FRMPD4, SHANK2, PPP…	1947	466	15514	2.03479	1.74575e-12	1.56091e-12
GOTERM_CC	GO:0044445~cytosolic part	75	3.68527e-14	-13.4335	RPS8, RPS13, RPLP2, RPS7, RRM1, RPL13A, RPL9, RPS21, RPS9, RPS16, RPL34, RPL13, RPL23, RPS15, RPL35, FAU, RPSA, RPS28, RPL12, RPS6, UBA52, SNU13, RPS18, RPL19, RPL29, RPS14, RPL21, RPS11, SNAP47, RPL35A, RIPK3, RPS3, IKBKB, RPL23A, RPL27, RPS12, RPL17, RPL37A, GUCY1A2, RPL36, RPL39, RPL22L1, RPS10, RPL6, RPL30, RPS2, RPS23, RPL18, RPL38, RPS19, RPL14, RPLP1, ENO3, RPS4X, RPS25, GUCY1B1, HPS5, RPS…	1947	239	15514	2.50047	3.13248e-12	2.8008e-12
GOTERM_CC	GO:0014069~postsynaptic density	63	6.34245e-14	-13.1977	PPP1R9A, BCR, LIN7B, DLG4, CNKSR2, PKP4, MAPK8IP2, GRM3, GSK3B, RTN4, BAIAP2, LRP8, LZTS3, NCS1, GRIN2A, KCNAB2, GRIN2C, PPP1R9B, CABP1, SPTBN1, DLG3, GOPC, SPOCK1, DLG2, PCLO, DAB1, CAMK2A, KALRN, LYN, LRFN1, NEURL1, CPEB1, CNIH2, MT-ND2, CNN3, SIPA1L1, MAGI2, ARRB1, BMPR2, LRRC7, SHANK3, PTK2B, RAB8A, GRM5, MAPT, NSF, RUSC1, ADD3, CPEB3, STRN, PICK1, CACNA1C, SORCS3, IGSF9B, CDK5R1, CLSTN1, MYD…	1947	184	15514	2.72823	4.49257e-12	4.01689e-12
GOTERM_CC	GO:0099572~postsynaptic specialization	63	6.34245e-14	-13.1977	PPP1R9A, BCR, LIN7B, DLG4, CNKSR2, PKP4, MAPK8IP2, GRM3, GSK3B, RTN4, BAIAP2, LRP8, LZTS3, NCS1, GRIN2A, KCNAB2, GRIN2C, PPP1R9B, CABP1, SPTBN1, DLG3, GOPC, SPOCK1, DLG2, PCLO, DAB1, CAMK2A, KALRN, LYN, LRFN1, NEURL1, CPEB1, CNIH2, MT-ND2, CNN3, SIPA1L1, MAGI2, ARRB1, BMPR2, LRRC7, SHANK3, PTK2B, RAB8A, GRM5, MAPT, NSF, RUSC1, ADD3, CPEB3, STRN, PICK1, CACNA1C, SORCS3, IGSF9B, CDK5R1, CLSTN1, MYD…	1947	184	15514	2.72823	4.49257e-12	4.01689e-12
GOTERM_CC	GO:0097060~synaptic membrane	80	5.40891e-13	-12.2669	F2R, UNC13A, BCR, LRRC4, LIN7B, DLG4, CNKSR2, GRM3, CHRNA2, PTEN, DAG1, DMD, GRIP1, DENND1A, GABRA3, APBB1, PCDH8, GABRD, LZTS3, NCS1, CHRNB3, GRIN2A, KCTD16, GABRA4, SYNE1, GABRG2, GRIN2C, ZDHHC17, PPP1R9B, CABP1, LRRTM4, DLG3, CHRM2, KCNA1, GOPC, DLG2, ADGRL1, IQSEC3, SYNJ1, CAMK2A, NLGN2, LRRC4B, GRIK4, LRFN1, KCNA2, NEURL1, CPEB1, CNIH2, ANK3, SIPA1L1, ARRB1, SEMA4F, GRIN2B, LRRC7, LRRC4C, SH…	1947	276	15514	2.30961	3.53659e-11	3.16213e-11
GOTERM_CC	GO:0015934~large ribosomal subunit	46	1.31122e-12	-11.8823	RPL35A, MRPL13, MRPL52, MRPL35, RPL23A, RPL27, MRPL49, RPL17, RPL37A, RPLP2, MRPL3, RPL36, RPL13A, RPL9, RPL22L1, RPL39, MRPL39, RPL6, RPL30, RPL18, RPL34, RPL38, RPL13, RPL14, RPL23, MRPL23, RPLP1, RPL4, RPL10A, RPL35, MRPL11, MRPL47, RPL12, RPL7, RPL24, SNU13, UBA52, RPL5, MRPL32, RPL19, RPLP0, RPL29, RPL10, RPL21, RPL11, RPL18A	1947	118	15514	3.10623	7.96096e-11	7.11804e-11
GOTERM_CC	GO:0045211~postsynaptic membrane	66	2.17576e-12	-11.6624	F2R, BCR, LRRC4, LIN7B, DLG4, CNKSR2, GRM3, CHRNA2, PTEN, DAG1, DMD, GRIP1, GABRA3, APBB1, PCDH8, GABRD, LZTS3, NCS1, CHRNB3, GRIN2A, KCTD16, GABRA4, SYNE1, GABRG2, GRIN2C, CABP1, LRRTM4, DLG3, CHRM2, GOPC, DLG2, IQSEC3, NLGN2, GRIK4, LRFN1, NEURL1, CPEB1, CNIH2, ANK3, SIPA1L1, ARRB1, SEMA4F, GRIN2B, LRRC7, LRRC4C, SHANK3, RUSC1, CPEB3, CHRM3, GABRA1, STRN, PICK1, GABBR2, IGSF9B, GABBR1, CLSTN1, …	1947	212	15514	2.48065	1.23293e-10	1.10239e-10
GOTERM_CC	GO:0043232~intracellular non-membrane-bounded organelle	632	5.11035e-12	-11.2915	CAPG, RFC4, NUP62, CNKSR2, ARPC5, PKP4, ABTB1, GNAI3, TMX1, GSK3B, PRC1, CDK4, POLR3D, RAB11FIP3, ARHGAP39, CDC6, FGD6, PNO1, GRIN2C, ARPC3, NUP37, PARVG, AMBRA1, NF1, GOPC, RIOX1, RPSA, NSD3, CORO1A, SEPTIN2, RAB22A, EMG1, RPL19, RPL21, FRMPD1, CHEK2, ADD1, DPY30, AAAS, ACTL6A, CATIP, MRPL40, CPEB1, USP20, CDK6, MCM6, STX1B, SMARCA2, ATG2A, RRP9, NCF2, EFHC1, AKAP11, MYC, NOTCH3, TBC1D30, RPL39,…	1947	4026	15514	1.25084	2.6236e-10	2.34581e-10
GOTERM_CC	GO:0022627~cytosolic small ribosomal subunit	27	5.2472e-12	-11.2801	RPS3, RPS8, RPS13, RPS12, RPS7, RPS21, RPS9, RPS10, RPS16, RPS23, RPS2, RPS19, RPS4X, RPS25, RPS5, RPS15, RPSA, FAU, RPS28, RPS3A, RPS27L, RPS6, RPS18, RPS14, RPS17, EIF2D, RPS11	1947	48	15514	4.48209	2.6236e-10	2.34581e-10
GOTERM_CC	GO:0098590~plasma membrane region	189	1.10381e-11	-10.9571	F2R, LRRC4, EHD2, STXBP2, HYAL2, CNKSR2, PTPRJ, ANXA2, LCP2, PLEK, ANXA1, CHRNA2, TMEM231, TRPV4, DENND1A, GRIP1, LRP8, PCDH8, GABRD, LZTS3, NCS1, CHRNB3, KCTD16, EHD3, EFNA5, GABRA4, SYNE1, HMOX1, GRIN2C, SLC8A2, ZDHHC17, SPTBN1, WWC1, UNC5A, LRRTM4, AKR1A1, CHRM2, OPRM1, CNNM4, GOPC, DLG2, ADGRL1, PRKCZ, F2RL2, IQSEC3, SYNJ1, SLC16A10, AQP3, KCNJ10, SEPTIN2, NLGN2, PIP5K1C, LRRC4B, SLC23A2, SYN…	1947	936	15514	1.60895	5.21245e-10	4.66054e-10
GOTERM_CC	GO:0030529~intracellular ribonucleoprotein complex	164	2.21844e-11	-10.654	CANX, MRPL52, NUP62, RPS8, RPS13, GSK3B, RBMX2, RPL13A, RPS16, EIF3H, UHMK1, SF3A2, LSM3, PTBP2, RPS15, RPL35, MRPL11, ILF2, SRP9, RPSA, UBA52, EMG1, RPL19, RPS14, RPL21, RPS11, SNRPC, RPS3, PSMA2, MRPL35, DAP3, RPL23A, RPL27, MRPL40, CPEB1, MRPL49, SRA1, RRP9, PPIL1, PPIH, CPEB2, RPL17, CLOCK, RPL36, LGALS3, RPL39, SNRPG, RPL30, RPS2, SNRPD2, RPL18, RPL38, RPS19, BTBD6, MRPS6, RPL14, LARP1B, NDU…	1947	786	15514	1.66257	9.9246e-10	8.87376e-10
GOTERM_CC	GO:0015935~small ribosomal subunit	31	5.77094e-10	-9.23875	RPS3, DAP3, RPS8, RPS13, RPS12, RPS7, RPS21, RPS9, RPS10, RPS16, RPS23, RPS2, RPS19, MRPS6, MRPS33, RPS4X, RPS25, RPS5, RPS15, RPSA, FAU, RPS28, RPS3A, RPS27L, RPS6, RPS18, RPS14, RPS17, RACK1, EIF2D, RPS11	1947	72	15514	3.43073	2.45265e-08	2.19296e-08
GOTERM_CC	GO:0030424~axon	97	1.66424e-09	-8.77878	CANX, DNAJC5, MYH14, KIF13B, FGF13, KIRREL3, LRP8, NCS1, KLC1, AMIGO1, UHMK1, SPTBN1, CHRM2, SLC6A1, NF1, DLG2, ADGRL1, PRKCZ, CPLX2, SYNJ1, CORO1A, LRRC4B, HCN1, KCNA2, AAK1, FKBP4, ADAM22, HIF1A, DPYSL2, CHRM3, NAPA, DNM1, HTT, SLC1A2, RAB3A, APP, L1CAM, GRM2, KCNQ2, CDK5R1, CIB1, KIF5B, PDYN, TBC1D24, SRCIN1, PTPRN, IQGAP1, UNC13A, DLG4, RAP1GAP, STMN4, GRM3, STMN3, STXBP1, DAG1, ALCAM, APBB1,…	1947	418	15514	1.84907	6.7362e-08	6.02296e-08
GOTERM_CC	GO:0043025~neuronal cell body	96	4.07868e-09	-8.38948	CANX, PPP1R9A, MAP1S, RAPGEF2, CNKSR2, ACSL4, RAP1GAP, TTLL7, MAPK8IP2, GSK3B, MYO5A, ALCAM, ACVRL1, VTI1A, BAIAP2, DENND1A, RRM1, APBB1, ARHGEF7, LRP8, ENC1, CACNA1F, KLC1, AMIGO1, SLC31A1, TRPC5, APOE, TIAM1, CACNA1A, SLC8A2, PPP1R9B, UNC5A, PTBP2, DLG3, CHRM2, OPRM1, KCNA1, SPTBN2, CNTNAP2, PRKCZ, RPSA, SEZ6L2, CPLX2, DAB1, SPTBN4, GPM6A, ATP13A2, KCNB2, RACK1, NTSR1, BRINP1, AP006333.1, SNAP4…	1947	419	15514	1.82564	1.57585e-07	1.409e-07
GOTERM_CC	GO:0070062~extracellular exosome	434	4.44786e-07	-6.35185	CAPG, CNKSR2, PI4KA, ARPC5, CD276, GNAI3, ABHD14A, USP14, EIF3H, ARPC3, RPSA, CORO1A, SEPTIN2, RAB22A, EPX, DNAJA1, FRMPD1, HSPA5, IAH1, GNPDA1, CRIM1, TMED10, ANXA11, RPL30, SNRPD2, DPYSL2, DDR2, FUCA1, NME1, CPNE5, CUX2, APP, MPP6, SNX3, ATP6V1G1, GPRC5B, RAB23, DOP1B, FGR, VASP, AHCY, IGFBP3, GNA13, RREB1, SERPINB1, BCR, PTPN6, JADE2, PHB, FNBP1L, STXBP1, ALCAM, DAG1, ASPA, SLC25A5, SH3GL2, RP…	1947	2811	15514	1.23023	1.62113e-05	1.44948e-05
GOTERM_CC	GO:0030426~growth cone	41	4.57731e-07	-6.33939	MYH14, PPP1R9A, FGF13, EXOC8, STMN4, NGEF, STMN3, GSK3B, MYO5A, TRPV4, FKBP4, APBB1, SETX, PTK2B, INPP5J, DPYSL2, MAPT, PCDH9, KLC1, WHRN, TRPC5, TIAM1, THY1, ARPC3, PPP1R9B, APP, L1CAM, DLG3, PTBP2, CDK5R1, KIF21B, ADGRL1, BOC, CDKL5, GPM6A, CIB1, KIF5B, RASGRF1, MAPK8IP1, SHANK2, IQGAP1	1947	142	15514	2.30066	1.62113e-05	1.44948e-05
GOTERM_CC	GO:0034702~ion channel complex	67	4.86923e-07	-6.31254	DLG4, VWC2L, CACNA2D1, CHRNA2, CACNA2D2, GABRA3, GABRD, CHRNB3, CACNA1I, CACNB1, GRIN2A, SCN2B, SCN10A, ABHD6, CACNA1F, GABRA4, CLIC2, AMIGO1, NOS1, AKAP6, TRPC5, KCNAB2, CACNA1A, GABRG2, GRIN2C, CACNA1D, CACNA1E, KCNJ6, DLG3, SCN8A, KCNA1, DLG2, CNTNAP2, NOS1AP, STXBP5, KCNB2, CACNB2, CACNB3, GRIK4, KCNA2, CNIH2, KCNAB1, KCNG3, GRIN2B, OLFM3, PTK2B, KCNIP4, GABRA1, KCNN1, CACNA1C, DPP6, CACNA2D4…	1947	286	15514	1.86667	1.65554e-05	1.48025e-05
GOTERM_CC	GO:0043197~dendritic spine	34	6.09583e-07	-6.21497	CANX, LRRC4, PPP1R9A, NEURL1, DLG4, CNIH2, CNN3, SIPA1L1, GRM3, ARRB1, PTEN, PRKAR2B, BAIAP2, APBB1, SHANK3, PALMD, ARFGEF2, STRN, NOS1, ZMYND8, TIAM1, SLC8A2, PPP1R9B, APP, SRI, CDK5R1, ARHGAP44, GPM6A, SLC8A3, SLC8A1, NTSR1, NR1D1, SHANK2, FRMPD4	1947	108	15514	2.50849	1.99287e-05	1.78186e-05
GOTERM_CC	GO:0044459~plasma membrane part	408	8.54667e-07	-6.0682	F2R, CNKSR2, PLEK, PKP4, CD276, CADM3, GNAI3, LCP2, FGFR2, ADRA1B, KCNK3, CHRNB3, CACNA1I, KCTD16, GABRA4, GRIN2C, ZDHHC17, WWC1, UNC5A, SLC6A1, NF1, GOPC, MMP14, BTK, CORO1A, SEPTIN2, KCNB2, KCNH7, AP006333.1, CRHR1, CPEB1, KCNJ9, AAK1, NCF2, TMED10, SHANK3, TSPAN18, HCK, DDR2, NCF4, PLPP5, NME1, CHRM3, ADRB1, MPP3, CMKLR1, IGSF9B, APP, FADD, KCNQ2, AP2B1, CACNA2D3, TMEM150C, GNAO1, FGR, VASP, K…	1947	2635	15514	1.23378	2.69062e-05	2.40573e-05
GOTERM_CC	GO:0044309~neuron spine	34	9.69331e-07	-6.01353	CANX, LRRC4, PPP1R9A, NEURL1, DLG4, CNIH2, CNN3, SIPA1L1, GRM3, ARRB1, PTEN, PRKAR2B, BAIAP2, APBB1, SHANK3, PALMD, ARFGEF2, STRN, NOS1, ZMYND8, TIAM1, SLC8A2, PPP1R9B, APP, SRI, CDK5R1, ARHGAP44, GPM6A, SLC8A3, SLC8A1, NTSR1, NR1D1, SHANK2, FRMPD4	1947	110	15514	2.46288	2.94261e-05	2.63104e-05
GOTERM_CC	GO:0098797~plasma membrane protein complex	105	1.29153e-06	-5.88889	GNAI3, CACNA2D1, CHRNA2, CACNA2D2, CHRNB3, ITGB2, CACNA1I, SCN2B, SCN10A, CACNA1F, AMIGO1, TGFBR1, CACNA1A, GRIN2C, GNG5, CACNA1E, DLG2, SYNJ1, LYN, STXBP5, KCNB2, KCNA2, NCF2, SGCD, TMED10, ITGA9, CYBB, NCF4, EPS15L1, GNG12, NEO1, KCNN1, CACNA1C, GABBR2, CACNA2D4, FADD, KCNQ2, AP2B1, CACNA2D3, APC, GNAO1, ITGAE, GNA13, SHISA7, ATP1A1, CYBA, CD4, KCNC1, KCNT1, SHANK2, FKRP, DLG4, VWC2L, PTPN6, SG…	1947	527	15514	1.58758	3.78552e-05	3.3847e-05
GOTERM_CC	GO:0016023~cytoplasmic, membrane-bounded vesicle	203	1.55868e-06	-5.80724	CANX, CAPG, STXBP2, SYT3, CALU, PI4KA, LMAN2L, SLC17A6, GNAI3, FGFR2, DENND1A, GRIP1, STARD4, CXCR4, USP14, TEX261, PDIA6, EHD3, APOE, PCSK5, ZDHHC17, AMBRA1, PACS1, GOPC, MMP14, CORO1A, RAB22A, CHP1, AP006333.1, HSPA5, PLEKHG5, AAK1, CTNS, STX1B, NCF2, TMED10, ANXA11, SYT2, HCK, FNBP1, NCF4, TCIRG1, CNST, RAB9B, RAC2, HTT, VEGFB, APP, SNX3, GPRC5B, AP2B1, RAB23, RIN3, PTPRN, AHCY, GNA13, ATP1A1,…	1947	1183	15514	1.36732	4.41626e-05	3.94865e-05
GOTERM_CC	GO:0033267~axon part	53	2.78057e-06	-5.55587	DNAJC5, UNC13A, DLG4, KIF13B, STXBP1, DAG1, APBB1, PTPRN2, TIAM1, KCNAB2, SPTBN1, SRI, CHRM2, SCN8A, KCNA1, SPOCK1, DLG2, CNTNAP2, PRKCZ, SYNJ1, CPLX2, SV2A, SPTBN4, GPM6A, MAPK8IP1, NTSR1, KCNA2, BIN1, ANK3, AAK1, KCNAB1, FKBP4, HIF1A, DPYSL2, SYNGR1, DAB2IP, CHRM3, NAPA, DNM1, SLC1A2, RAB3A, APP, L1CAM, KCNQ2, PACSIN1, SYT7, BOC, KIF5B, PDYN, TBC1D24, KCNQ3, PTPRN, ELK1	1947	218	15514	1.93721	7.62413e-05	6.81687e-05
GOTERM_CC	GO:1902495~transmembrane transporter complex	71	2.87663e-06	-5.54112	DLG4, VWC2L, CACNA2D1, CHRNA2, CACNA2D2, GABRA3, GABRD, CHRNB3, CACNA1I, CACNB1, GRIN2A, ATP1B1, SCN2B, SCN10A, ABHD6, CACNA1F, GABRA4, CLIC2, AMIGO1, NOS1, AKAP6, TRPC5, KCNAB2, CACNA1A, GABRG2, GRIN2C, CACNA1D, CACNA1E, KCNJ6, DLG3, SCN8A, KCNA1, DLG2, CNTNAP2, NOS1AP, STXBP5, KCNB2, CACNB2, CACNB3, GRIK4, KCNA2, CNIH2, KCNAB1, KCNG3, MT-CYB, GRIN2B, OLFM3, PTK2B, KCNIP4, GABRA1, KCNN1, CACNA1C…	1947	324	15514	1.74611	7.64106e-05	6.832e-05
GOTERM_CC	GO:0030175~filopodium	29	5.83124e-06	-5.23424	OSBPL3, PPP1R9A, DEF6, FGF13, RAPH1, CD302, MYO5A, TWF1, DAG1, TRPV4, DMD, BAIAP2, UBE2K, APBB1, ENAH, MSN, PPP1R9B, APP, LCP1, ABI2, FGD4, IQGAP2, MYO1G, GPM6A, CIB1, SRCIN1, VASP, SYNE2, INPPL1	1947	93	15514	2.48469	0.000150199	0.000134295
GOTERM_CC	GO:0044304~main axon	22	6.32241e-06	-5.19912	KCNA2, DLG4, KCNAB2, TIAM1, KIF13B, DNM1, SLC1A2, ANK3, BIN1, SPTBN1, APP, KCNQ2, KCNAB1, SCN8A, SPOCK1, DLG2, KCNA1, DAG1, CNTNAP2, APBB1, SPTBN4, KCNQ3	1947	60	15514	2.92166	0.00015806	0.000141324
GOTERM_CC	GO:0048471~perinuclear region of cytoplasm	119	7.44897e-06	-5.1279	EHD2, HYAL2, ANXA2, PKP4, GSK3B, APLN, CDK4, VTI1A, ALG2, STING1, NCS1, TNFSF13B, NPC1, PSTPIP1, VAMP5, EHD3, CTSB, HMOX1, THBS3, AMBRA1, WWC1, PRKCZ, RAB4B, BTK, SEPTIN2, LYN, MAD2L1, HMGB2, DNAJA1, SNAP47, AP006333.1, SELE, NEURL1, USP20, PLEKHG5, RASGRP3, PRKCA, TWF1, FKBP4, CYBB, USP2, SEPTIN9, SLC30A7, NME1, PLVAP, PER2, APP, CDK5R1, LPXN, CYFIP2, CIB1, KIF5B, NDFIP1, AATK, PPP1R16B, CYBA, O…	1947	639	15514	1.4839	0.000180904	0.000161749
GOTERM_CC	GO:0005730~nucleolus	154	1.33135e-05	-4.87571	CAPG, FGF13, ANP32B, RPS13, ABTB1, PINX1, TMX1, CDK4, PAFAH1B2, RPL13A, POLR2H, XRN2, FBXW7, P3H4, CTSB, HMOX1, PNO1, SPTBN1, NF1, RPL35, RIOX1, ILF2, DDX24, WEE1, PIK3CB, SEPTIN2, EMG1, RPL19, RPS14, RPL21, RPS11, HMGB2, RPS3, RPL23A, MRPL40, RRP9, JAZF1, NCF2, NIFK, MYC, POLR2L, RPL36, ANAPC11, EXOSC8, EXOSC6, PGRMC1, RAB8A, RPS2, DNTTIP1, RPL18, RPS19, ADARB1, PER2, NIP7, DDX52, MIDN, NOP2, NM…	1947	882	15514	1.39127	0.000312561	0.000279466
GOTERM_CC	GO:0031410~cytoplasmic vesicle	212	1.36056e-05	-4.86628	CANX, CAPG, STXBP2, SYT3, CALU, PI4KA, LMAN2L, SLC17A6, GNAI3, FGFR2, DENND1A, GRIP1, STARD4, CXCR4, USP14, TEX261, PDIA6, EHD3, APOE, PCSK5, ZDHHC17, AMBRA1, PACS1, GOPC, MMP14, BTK, CORO1A, RAB22A, CHP1, AP006333.1, HSPA5, PLEKHG5, AAK1, CTNS, STX1B, NCF2, TMED10, ANXA11, SH3TC2, SYT2, HCK, FNBP1, NCF4, TCIRG1, CNST, RAB9B, RAC2, HTT, VEGFB, APP, SNX3, GPRC5B, AP2B1, RAB23, RIN3, PTPRN, AHCY, B…	1947	1284	15514	1.31561	0.000312561	0.000279466
GOTERM_CC	GO:0097708~intracellular vesicle	212	1.47947e-05	-4.82989	CANX, CAPG, STXBP2, SYT3, CALU, PI4KA, LMAN2L, SLC17A6, GNAI3, FGFR2, DENND1A, GRIP1, STARD4, CXCR4, USP14, TEX261, PDIA6, EHD3, APOE, PCSK5, ZDHHC17, AMBRA1, PACS1, GOPC, MMP14, BTK, CORO1A, RAB22A, CHP1, AP006333.1, HSPA5, PLEKHG5, AAK1, CTNS, STX1B, NCF2, TMED10, ANXA11, SH3TC2, SYT2, HCK, FNBP1, NCF4, TCIRG1, CNST, RAB9B, RAC2, HTT, VEGFB, APP, SNX3, GPRC5B, AP2B1, RAB23, RIN3, PTPRN, AHCY, B…	1947	1286	15514	1.31357	0.000330934	0.000295894
GOTERM_CC	GO:0044446~intracellular organelle part	1119	1.78446e-05	-4.74849	RFC4, SYT3, NUP62, PI4KA, IKBKE, LMAN2L, ST6GALNAC6, SMAD5, NCBP2, CDK4, RBMX2, ADRA1B, DNAJC1, SHOC2, MCM8, AIFM3, CDC6, KPNA6, MAPKAPK3, ARPC3, BCL2L10, GMNN, PRELID1, RIOX1, MMP14, ZEB1, TOMM20, SEPTIN2, EMG1, RPL19, CLPP, TIMM9, SNRPC, CHEK2, ADD1, AP006333.1, ACTL6A, DGKH, SUPT4H1, CPEB1, CDK6, HSPA5, SLC35D1, RRP9, DDB2, NCF2, DTYMK, MYC, MT-CO1, NOTCH3, TBC1D30, ANXA11, CHCHD10, DNTTIP1, S…	1947	8233	15514	1.083	0.00038892	0.000347741
GOTERM_CC	GO:0031256~leading edge membrane	36	2.45403e-05	-4.61012	RPS3, PLEKHA1, KCNA2, PTPRJ, PLEK, EEF1A1, TWF1, TRPV4, MYO1C, CSPG4, NCKAP1, TESC, NME1, TIAM1, GABRG2, SLC1A2, PPP1R9B, WWC1, SPTBN1, UNC5A, LCP1, OPRM1, ARHGAP44, APC, PDE4A, CNTNAP2, KSR1, PACSIN1, MYO1G, CDKL5, CIB1, PIP5K1C, FGR, VASP, SYNE2, KCNC1	1947	137	15514	2.09382	0.000521481	0.000466265
GOTERM_CC	GO:0045121~membrane raft	60	2.63417e-05	-4.57936	F2R, EHD2, HYAL2, KRAS, ANXA2, PRKAR1A, GNAI3, LCP2, LTB4R, DAG1, DMD, GRIP1, LAMTOR4, LRP8, CLIP3, ATP1B1, SERPINH1, NPC1, EFNA5, NOS1, AKAP6, TGFBR1, TRPC5, HMOX1, UNC5A, PECAM1, OPRM1, LAMTOR5, STOML3, PRKCZ, NOS1AP, BTK, LYN, CNTN1, NTSR1, ADCY1, RAP1B, IKBKB, SELE, RTN4RL1, CAV1, MYO1C, PRKAR2B, BMPR2, PTK2B, HCK, LAMTOR1, RANGRF, PLVAP, MAPK1, THY1, APP, FADD, GPRC5B, ZAP70, TGFBR2, GPC1, A…	1947	277	15514	1.72595	0.000546108	0.000488285
GOTERM_CC	GO:0034703~cation channel complex	42	3.55297e-05	-4.44941	KCNA2, DLG4, CACNA2D1, KCNAB1, KCNG3, CACNA2D2, KCNIP4, CACNA1I, CACNB1, SCN10A, SCN2B, CACNA1F, AMIGO1, KCNN1, NOS1, AKAP6, CACNA1C, TRPC5, DPP6, KCNAB2, CACNA1A, CACNA2D4, KCNQ2, CACNA1D, CACNA1E, KCNJ6, SCN8A, DLG2, KCNA1, CACNA2D3, RYR1, HCN4, CNTNAP2, NOS1AP, KCNQ5, KCNQ3, KCNA4, KCNB2, CACNB2, CACNB3, KCNC1, KCNT1	1947	173	15514	1.93447	0.000719053	0.000642918
GOTERM_CC	GO:0042734~presynaptic membrane	21	5.2948e-05	-4.27615	UNC13A, PICK1, KCNA2, ZDHHC17, GABBR1, GRM2, GRM3, KCNA1, DENND1A, ADGRL1, SYT7, APBB1, PCDH8, CAMK2A, NLGN2, RIMS1, LRRC4B, KCTD8, GRIN2A, KCTD16, GRIK4	1947	63	15514	2.65605	0.00104665	0.000935824
GOTERM_CC	GO:0048770~pigment granule	29	8.20683e-05	-4.08582	CANX, CAPG, DNAJC5, CALU, HSPA5, ANXA2, CTNS, GPNMB, CNP, MYO5A, TMED10, PPIB, ANXA11, PDIA3, SYNGR1, PDIA6, SGSM2, CTSB, RPN1, PDIA4, RAB27B, MMP14, FASN, SLC3A2, RAB32, AHCY, GNA13, ATP1A1, P4HB	1947	106	15514	2.17997	0.00158541	0.00141754
GOTERM_CC	GO:1990454~L-type voltage-gated calcium channel complex	6	0.000166134	-3.77954	CACNA1C, NOS1AP, CACNA2D1, CACNA1D, CACNB2, CACNB3	1947	6	15514	7.96816	0.00313809	0.00280582
GOTERM_CC	GO:0030659~cytoplasmic vesicle membrane	90	0.000191625	-3.71755	DNAJC5, STXBP2, SYT3, DLG4, SNX7, SLC17A6, ATP6V0E1, ANXA1, SGIP1, VTI1A, DENND1A, NECAP2, AFTPH, VMA21, TMED2, STING1, SVOP, TAOK2, SH3GL2, PTPRN2, CAMK2B, TMED3, VAMP5, GAD1, RAB27B, LMAN1, COPE, FZD2, SREBF1, ZDHHC17, TNK2, SRI, PECAM1, YWHAG, DOC2A, RAB13, SV2A, CORO1A, UBA52, CAMK2A, SEC13, RAB22A, DMXL2, STXBP5, RAB11FIP2, ABCC4, AP006333.1, DIPK2A, RHBG, CAV1, CNIH2, ECE2, SLC17A7, ARRB1, …	1947	491	15514	1.46056	0.00354089	0.00316597
GOTERM_CC	GO:0034709~methylosome	8	0.000215266	-3.66702	SNRPB, SNRPG, CLNS1A, SNRPD1, SNRPD2, ERH, PRMT5, SNRPE	1947	12	15514	5.3121	0.00379833	0.00339616
GOTERM_CC	GO:0005657~replication fork	20	0.000218558	-3.66043	BCL6, RFC4, RFC3, PCNA, MCM3, RFC2, RPA2, GINS2, TIPIN, MCM10, POLD1, ZMIZ2, RAD51B, UHRF1, PRIM2, PURA, GINS4, RPA3, TP53, POLA2	1947	64	15514	2.49005	0.00379833	0.00339616
GOTERM_CC	GO:0005891~voltage-gated calcium channel complex	15	0.000218963	-3.65963	NOS1, CACNA1C, CACNA1A, CACNA2D4, CACNA2D1, CACNA1D, CACNA1E, CACNA2D3, CACNA2D2, NOS1AP, CACNA1I, CACNB1, CACNB2, CACNA1F, CACNB3	1947	40	15514	2.98806	0.00379833	0.00339616
GOTERM_CC	GO:0031234~extrinsic component of cytoplasmic side of plasma membrane	27	0.000227867	-3.64232	CYTH1, DLG4, KRAS, GNAI3, GNG7, KCNAB1, ARRB1, PTK2B, SNX5, HCK, MCF2L, GNAZ, GNG12, RGS7, KCNAB2, TIAM1, GNG5, TNK2, BTK, GNAO1, ZAP70, FGR, LYN, GNA13, GNA12, ABL2, IQGAP1	1947	101	15514	2.1301	0.00385291	0.00344495
GOTERM_MF	GO:0019901~protein kinase binding	122	2.26516e-11	-10.6449	SHC3, HYAL2, PTPRJ, KIF13B, PLEK, MAPK8IP2, GSK3B, PPME1, PRC1, CKS1B, TRPV4, NEK6, STING1, NCS1, ITGB2, CCNY, DOCK4, WAS, PRKCZ, NBEA, CHEK2, RPTOR, RPS3, STX1B, HIF1A, RAB8A, DPYSL2, PPP1R12C, RPS19, ANGPT2, SOCS1, NME1, GAB2, ZBTB4, DNM1, CDK5R1, GPRC5B, APC, NCK1, CKS2, CIB1, KIF5B, SRCIN1, PITPNM3, FGR, PXN, ATP1A1, CD4, IQGAP1, DACT3, HSPB1, PPP1R9A, TOM1L2, SMAD3, PTPN6, PRKAR1A, EEF1A1, I…	1524	531	12075	1.8204	1.32739e-08	1.28888e-08
GOTERM_MF	GO:0031267~small GTPase binding	68	4.93325e-07	-6.30687	ROCK2, ULK1, TBC1D9, RAP1GAP, ANXA2, MICAL3, RUNDC1, MYO5A, ODF2, BICDL1, DENND1A, RAB11FIP3, GGA3, DOCK4, SGSM2, PKN1, TIAM1, FGD6, RUSC2, ABI2, NET1, FGD4, CDKL5, RHOH, DMXL2, STXBP5, RAB11FIP2, CDC42EP5, EVI5L, ATP6AP1, DENND1B, XPO5, CAV1, SRGAP3, CYFIP1, EXOC8, NGFR, RBSN, RASGRP3, NCF2, MYO1C, SORL1, CDC42EP4, TBC1D30, NCKAP1, UNC13D, RIMS1, RAB8A, DAAM2, RPH3A, RANGRF, NSF, FMNL1, PFN1, CD…	1524	291	12075	1.85148	0.000121767	0.000118235
GOTERM_MF	GO:0022836~gated channel activity	75	6.23381e-07	-6.20525	DLG4, CACNA2D1, CHRNA2, CACNA2D2, TMEM37, TRPV4, KCNK3, GABRA3, GABRD, KCNJ12, NCS1, CHRNB3, TMEM63C, CACNA1I, CACNB1, GRIN2A, SCN2B, SCN10A, CACNA1F, KCNK9, GABRA4, CLIC2, KCNAB2, CACNA1A, GABRG2, GRIN2C, CACNA1D, CACNA1E, KCNJ6, DLG3, OPRM1, SCN8A, KCNA1, JPH3, HVCN1, KCNJ10, KCNB2, CACNB2, KCNH7, HCN1, CACNB3, GRIK4, KCNA2, SLC17A7, KCNJ9, KCNAB1, KCNG3, AQP1, KCNE4, GRIN2B, TRPM3, CYBB, PTK2B…	1524	334	12075	1.77917	0.000121767	0.000118235
GOTERM_MF	GO:0019843~rRNA binding	23	3.17779e-06	-5.49787	RPL23, RPS3, RPLP1, RPL23A, RPS4X, RPS13, ERI1, RPS5, RPLP2, MRPL11, RPL12, RPL9, RPF1, RPS9, RPS18, EMG1, RPL5, RPL19, RPLP0, RPS14, MRPS6, RPS11, RPL11	1524	62	12075	2.93926	0.000465547	0.000452041
GOTERM_MF	GO:0017076~purine nucleotide binding	299	9.13031e-06	-5.03951	RFC4, MYH14, PI4KA, KRAS, IKBKE, GNAI3, FGFR2, RAB30, NAV3, GSK3B, CDK4, CDK15, NKIRAS2, NEK6, STK36, MCM8, ATL3, CDC6, EHD3, MAPK8, TGFBR1, UHMK1, NMRK2, MAPKAPK3, KSR2, ILF2, BTK, SEPTIN2, PKLR, RAB22A, PIP5K1C, DNAJA1, HCN1, CHEK2, DGKH, STK40, CDK6, HSPA5, MCM6, AAK1, PAK6, SMARCA2, TWF1, DTYMK, TUBB2B, HCK, SEPTIN9, DDR2, NME1, MAP4K5, HIPK2, RAB9B, PFN1, RPS6KA2, RAC2, DAPK1, CHD3, KIF21A, …	1524	1897	12075	1.24884	0.000880949	0.000855392
GOTERM_MF	GO:0032555~purine ribonucleotide binding	297	9.8499e-06	-5.00657	RFC4, MYH14, PI4KA, KRAS, IKBKE, GNAI3, FGFR2, RAB30, NAV3, GSK3B, CDK4, CDK15, NKIRAS2, NEK6, STK36, MCM8, ATL3, CDC6, EHD3, MAPK8, TGFBR1, UHMK1, NMRK2, MAPKAPK3, KSR2, ILF2, BTK, SEPTIN2, PKLR, RAB22A, PIP5K1C, DNAJA1, HCN1, CHEK2, DGKH, STK40, CDK6, HSPA5, MCM6, AAK1, PAK6, SMARCA2, TWF1, DTYMK, TUBB2B, HCK, SEPTIN9, DDR2, NME1, MAP4K5, HIPK2, RAB9B, RPS6KA2, RAC2, DAPK1, CHD3, KIF21A, RAB23,…	1524	1884	12075	1.24904	0.000880949	0.000855392
GOTERM_MF	GO:0005216~ion channel activity	86	1.14573e-05	-4.94092	DLG4, CACNA2D1, CHRNA2, CACNA2D2, TMEM37, TRPV4, DENND5B, KCNK3, GABRA3, GABRD, KCNJ12, PKD1L2, NCS1, CHRNB3, TMEM63C, CACNA1I, CACNB1, GRIN2A, SCN2B, SCN10A, CALHM6, CACNA1F, KCNK9, GABRA4, CLIC2, TRPC5, KCNAB2, CACNA1A, GABRG2, GRIN2C, TMCO1, CACNA1D, CACNA1E, KCNJ6, DLG3, OPRM1, SCN8A, KCNA1, JPH3, SLC24A2, HVCN1, GPM6A, KCNJ10, KCNB2, CACNB2, KCNH7, HCN1, CACNB3, GRIK4, KCNA2, SLC17A7, KCNJ9,…	1524	429	12075	1.58834	0.000880949	0.000855392
GOTERM_MF	GO:0044822~poly(A) RNA binding	200	1.20266e-05	-4.91986	CANX, RPS13, NCBP2, RBMX2, RPL13A, BZW1, PARP12, XRN2, DUSP11, EIF3H, UHMK1, PNO1, PTBP2, RPS15, ILF2, RPSA, CORO1A, EMG1, RPL19, RPS14, RPL21, RPS11, HMGB2, SNRPC, ADD1, RPS3, RPL23A, MRPL40, CPEB1, RRP9, CDC42EP4, LGALS3, ANXA11, SNRPG, RPL30, SNRPD2, FAM133B, STRBP, RPS19, NME1, ADARB2, ADARB1, LARP1B, PFN1, NIP7, NMD3, CHD3, LYAR, HMGB1, RPL10, EIF3D, DNAJC21, HSPB1, ROCK2, CLNS1A, STXBP1, YB…	1524	1196	12075	1.32495	0.000880949	0.000855392
GOTERM_MF	GO:0032553~ribonucleotide binding	298	1.51125e-05	-4.82066	RFC4, MYH14, PI4KA, KRAS, IKBKE, GNAI3, FGFR2, RAB30, NAV3, GSK3B, CDK4, CDK15, NKIRAS2, NEK6, STK36, MCM8, ATL3, CDC6, EHD3, MAPK8, TGFBR1, UHMK1, NMRK2, MAPKAPK3, KSR2, ILF2, BTK, SEPTIN2, PKLR, RAB22A, PIP5K1C, DNAJA1, HCN1, CHEK2, DGKH, STK40, CDK6, HSPA5, MCM6, AAK1, PAK6, SMARCA2, TWF1, DTYMK, TUBB2B, HCK, SEPTIN9, DDR2, NME1, MAP4K5, HIPK2, RAB9B, RPS6KA2, RAC2, DAPK1, CHD3, KIF21A, RAB23,…	1524	1900	12075	1.2427	0.000897984	0.000871934
GOTERM_MF	GO:0022838~substrate-specific channel activity	88	1.5324e-05	-4.81463	DLG4, CACNA2D1, CHRNA2, CACNA2D2, TMEM37, TRPV4, DENND5B, KCNK3, GABRA3, GABRD, KCNJ12, PKD1L2, NCS1, CHRNB3, TMEM63C, CACNA1I, CACNB1, GRIN2A, SCN2B, SCN10A, CALHM6, AQP7, CACNA1F, KCNK9, GABRA4, CLIC2, TRPC5, KCNAB2, CACNA1A, GABRG2, GRIN2C, TMCO1, CACNA1D, CACNA1E, KCNJ6, DLG3, OPRM1, SCN8A, KCNA1, JPH3, SLC24A2, HVCN1, GPM6A, KCNJ10, AQP3, KCNB2, CACNB2, KCNH7, HCN1, CACNB3, GRIK4, KCNA2, SLC…	1524	445	12075	1.56684	0.000897984	0.000871934
GOTERM_MF	GO:0032550~purine ribonucleoside binding	288	3.98264e-05	-4.39983	RFC4, MYH14, PI4KA, KRAS, IKBKE, GNAI3, FGFR2, RAB30, NAV3, GSK3B, CDK4, CDK15, NKIRAS2, NEK6, STK36, MCM8, ATL3, CDC6, EHD3, MAPK8, TGFBR1, UHMK1, NMRK2, MAPKAPK3, KSR2, ILF2, BTK, SEPTIN2, PKLR, RAB22A, PIP5K1C, DNAJA1, CHEK2, DGKH, STK40, CDK6, HSPA5, MCM6, AAK1, PAK6, SMARCA2, TWF1, DTYMK, TUBB2B, HCK, SEPTIN9, DDR2, NME1, MAP4K5, HIPK2, RAB9B, RPS6KA2, RAC2, DAPK1, CHD3, KIF21A, RAB23, GNAO1…	1524	1850	12075	1.23345	0.00212166	0.00206011
GOTERM_MF	GO:0098641~cadherin binding involved in cell-cell adhesion	61	6.16067e-05	-4.21037	CAPG, PI4KA, SPTAN1, ANXA2, ANXA1, FNBP1L, PPME1, RTN4, BAIAP2, TMOD3, BZW1, RPL34, EEF1G, LIMA1, RUVBL1, SPTBN1, SH3GLB1, SPTBN2, FASN, WASF2, SEPTIN2, RPL29, RACK1, ADD1, MB21D2, RPL23A, NUDC, SH3GLB2, PDLIM1, HSPA5, CNN3, PAK6, EIF3E, CNN2, TWF1, TES, NOTCH3, NIBAN2, MRTFB, CORO1B, RPL6, SNX5, RPS2, SEPTIN9, EPS15L1, RPL14, DAB2IP, EIF2S3, MPP7, PFN1, CKAP5, DNAJB1, CLIC1, FLNA, NCK1, RPL24, K…	1524	290	12075	1.66661	0.00300846	0.00292119
GOTERM_MF	GO:0004860~protein kinase inhibitor activity	25	8.98688e-05	-4.04639	RTN4RL1, LRRC4, HYAL2, PRKAR1A, NPM1, IBTK, PRKAR2B, LRRC4C, SOCS2, TESC, SOCS1, TRIB3, CISH, PRKAR1B, LRRTM4, YWHAG, NCK1, CIB1, LRRC4B, CHP1, MAPK8IP1, RACK1, AP006333.1, DCN, HSPB1	1524	85	12075	2.33036	0.00405101	0.00393349
GOTERM_MF	GO:0004672~protein kinase activity	115	0.000139028	-3.8569	LTBP1, IKBKE, FGFR2, GSK3B, MAP3K9, CDK4, CDK15, NEK6, CAMK1, STK36, MAPK8, TGFBR1, UHMK1, MAPKAPK3, KSR2, OBSCN, LRRK1, PRKCZ, BTK, WEE1, KALRN, LYN, CHEK2, STK40, MAPK10, CDK6, AAK1, PAK6, PRKCA, TWF1, FAM20C, CRIM1, CAMKV, SNRK, HCK, DDR2, CDK17, MAP4K5, PLK2, HIPK2, STAT5A, RPS6KA2, CDC42BPB, DAPK1, CDK5R1, EPHA6, FGR, AATK, GRK3, NLK, ABL2, STK10, ROCK2, BCR, ULK1, MAP3K10, ACVRL1, MARK4, TA…	1524	652	12075	1.3975	0.00581932	0.0056505
GOTERM_MF	GO:0030554~adenyl nucleotide binding	241	0.000153803	-3.81304	RFC4, MYH14, PI4KA, KRAS, IKBKE, FGFR2, NAV3, GSK3B, CDK4, CDK15, NEK6, STK36, MCM8, CDC6, EHD3, MAPK8, TGFBR1, UHMK1, NMRK2, MAPKAPK3, KSR2, ILF2, BTK, PKLR, PIP5K1C, DNAJA1, HCN1, CHEK2, DGKH, STK40, CDK6, HSPA5, MCM6, AAK1, PAK6, SMARCA2, TWF1, DTYMK, HCK, DDR2, NME1, MAP4K5, HIPK2, PFN1, RPS6KA2, DAPK1, CHD3, KIF21A, APAF1, FGR, AHCY, ATP1A1, LIG1, ROCK2, BCR, PANK1, MCM2, MAP3K10, PRKAR1A, T…	1524	1542	12075	1.23833	0.00600857	0.00583426
GOTERM_MF	GO:0032559~adenyl ribonucleotide binding	239	0.000180036	-3.74464	RFC4, MYH14, PI4KA, KRAS, IKBKE, FGFR2, NAV3, GSK3B, CDK4, CDK15, NEK6, STK36, MCM8, CDC6, EHD3, MAPK8, TGFBR1, UHMK1, NMRK2, MAPKAPK3, KSR2, ILF2, BTK, PKLR, PIP5K1C, DNAJA1, HCN1, CHEK2, DGKH, STK40, CDK6, HSPA5, MCM6, AAK1, PAK6, SMARCA2, TWF1, DTYMK, HCK, DDR2, NME1, MAP4K5, HIPK2, RPS6KA2, DAPK1, CHD3, KIF21A, APAF1, FGR, ATP1A1, LIG1, ROCK2, BCR, PANK1, MCM2, MAP3K10, PRKAR1A, TTLL7, ACVRL1…	1524	1531	12075	1.23687	0.00659381	0.00640252
GOTERM_MF	GO:0008324~cation transmembrane transporter activity	107	0.000431155	-3.36537	CACNA2D1, CHRNA2, CACNA2D2, TRPV4, DENND5B, KCNK3, KCNJ12, PKD1L2, NCS1, CHRNB3, TMEM63C, CACNA1I, CALHM6, SCN2B, SCN10A, CACNA1F, CACNA1A, GRIN2C, SLC8A2, ZDHHC17, TMCO1, CACNA1E, OPRM1, CNNM4, SLC6A1, JPH3, KCNJ10, ATP13A2, SLC23A2, KCNB2, KCNH7, HCN1, RHBG, KCNA2, KCNJ9, ATP6V1E1, MCOLN2, MT-CO1, KCNE4, TRPM3, SLC30A7, TCIRG1, KCNN1, CACNA1C, SLC1A2, CACNA2D4, KCNQ2, ATP6V1G1, CACNA2D3, RYR1, …	1524	616	12075	1.37628	0.0148622	0.014431
GOTERM_MF	GO:0005524~ATP binding	229	0.000761174	-3.11852	RFC4, MYH14, PI4KA, KRAS, IKBKE, FGFR2, NAV3, GSK3B, CDK4, CDK15, NEK6, STK36, MCM8, CDC6, EHD3, MAPK8, TGFBR1, UHMK1, NMRK2, MAPKAPK3, KSR2, ILF2, BTK, PKLR, PIP5K1C, DNAJA1, CHEK2, DGKH, STK40, CDK6, HSPA5, MCM6, AAK1, PAK6, SMARCA2, TWF1, DTYMK, HCK, DDR2, NME1, MAP4K5, HIPK2, RPS6KA2, DAPK1, CHD3, KIF21A, APAF1, FGR, ATP1A1, LIG1, ROCK2, BCR, PANK1, MCM2, MAP3K10, TTLL7, ACVRL1, UBE2T, SETX, …	1524	1495	12075	1.21366	0.0247804	0.0240615
GOTERM_MF	GO:0016917~GABA receptor activity	10	0.000839723	-3.07586	GABRA1, GABRA3, GABBR2, GABRD, GABRG2, GABRA5, GABRR1, GABBR1, GABRB2, GABRA4	1524	22	12075	3.60147	0.0258988	0.0251475
GOTERM_MF	GO:0098811~transcriptional repressor activity, RNA polymerase II activating transcription factor binding	16	0.00216171	-2.6652	KLF4, HIPK2, HYAL2, WBP2, MEF2A, SMARCA2, MRTFA, LMO2, CLOCK, SOX11, NCOA1, PRRX1, MRTFB, SOX4, PPARA, RERE	1524	54	12075	2.34762	0.0633381	0.0615006
GOTERM_MF	GO:0031625~ubiquitin protein ligase binding	53	0.00419679	-2.37708	UBE2C, SLC22A18, PER3, SMAD3, IKBKE, ABTB1, PRKAR1A, SMAD5, GSK3B, ASB4, UBE2T, GPR37, SLC25A5, STING1, CXCR4, FBXW7, MID1, TUBB, TNK2, AMBRA1, DLG3, TXNIP, KLHL11, ABI2, CKB, PRKN, LYN, CHEK2, DNAJA1, SHPRH, HM13, ACVR1B, HSPA5, NGFR, DTX1, ARRB1, PRKAR2B, UBE2K, HIF1A, USP2, BTBD6, TRIB3, ACTG1, PIAS1, TP53, HERC2, SMG5, RPA2, BTBD3, ATP6V0C, TRIM37, CCT2, NLK	1524	287	12075	1.46317	0.11711	0.113713
GOTERM_MF	GO:0005525~GTP binding	67	0.00504952	-2.29675	EHD2, KRAS, GNAI3, RAB30, EEF1A1, RHOF, RHOBTB2, ADSS2, RAB6B, NKIRAS2, RRAS, RAP2A, SEPTIN10, ATL3, RAB34, EHD3, TUBB, GLUD1, RAB27B, ARF3, AGAP1, LRRK1, RAB4B, RAB13, RHOH, REM2, SEPTIN2, RAB22A, ARHGAP5, GBP2, GNAL, RAP1B, SCG5, GNA12, TUBB6, GUCY1A2, FKBP4, TRIM23, TUBB2B, THG1L, PCK2, RAB8A, NRAS, SEPTIN9, RASL12, DIRAS1, NME1, GNAZ, EIF2S3, RAB9B, AGAP3, DNM1, RAC2, GUCY1B1, RAB3A, DAPK1, C…	1524	384	12075	1.38244	0.133697	0.129818
GOTERM_MF	GO:0032561~guanyl ribonucleotide binding	70	0.00524748	-2.28005	EHD2, RAPGEF2, KRAS, GNAI3, RAB30, EEF1A1, RHOF, RHOBTB2, ADSS2, RAB6B, NKIRAS2, STING1, RRAS, RAP2A, SEPTIN10, ATL3, RAB34, EHD3, TUBB, GLUD1, RAB27B, ARF3, AGAP1, LRRK1, RAB4B, RAB13, RHOH, REM2, SEPTIN2, RAB22A, ARHGAP5, GBP2, GNAL, RAP1B, SCG5, GNA12, TUBB6, GUCY1A2, FKBP4, TRIM23, TUBB2B, THG1L, PCK2, RAB8A, NRAS, SEPTIN9, RASL12, DIRAS1, NME1, GNAZ, EIF2S3, RAB9B, AGAP3, DNM1, RAC2, GUCY1B1…	1524	405	12075	1.36945	0.133697	0.129818
GOTERM_MF	GO:0019001~guanyl nucleotide binding	70	0.00561229	-2.25086	EHD2, RAPGEF2, KRAS, GNAI3, RAB30, EEF1A1, RHOF, RHOBTB2, ADSS2, RAB6B, NKIRAS2, STING1, RRAS, RAP2A, SEPTIN10, ATL3, RAB34, EHD3, TUBB, GLUD1, RAB27B, ARF3, AGAP1, LRRK1, RAB4B, RAB13, RHOH, REM2, SEPTIN2, RAB22A, ARHGAP5, GBP2, GNAL, RAP1B, SCG5, GNA12, TUBB6, GUCY1A2, FKBP4, TRIM23, TUBB2B, THG1L, PCK2, RAB8A, NRAS, SEPTIN9, RASL12, DIRAS1, NME1, GNAZ, EIF2S3, RAB9B, AGAP3, DNM1, RAC2, GUCY1B1…	1524	406	12075	1.36607	0.136093	0.132145
GOTERM_MF	GO:0001105~RNA polymerase II transcription coactivator activity	12	0.00580602	-2.23612	NCOA1, HIPK2, PRRX1, MRTFB, HYAL2, WBP2, MEF2A, SMARCA2, MRTFA, SOX4, SOX11, RERE	1524	38	12075	2.50207	0.136093	0.132145
GOTERM_MF	GO:0005096~GTPase activator activity	51	0.00612485	-2.2129	BCR, TBC1D9, RAPGEF2, RAP1GAP, RALGAPA1, GARNL3, RUNDC1, ARHGEF11, ARHGAP11A, ADAP2, DOCK4, ARHGAP39, SGSM2, RGS7, ARHGAP44, NF1, ABR, AGAP1, FAM13A, ARHGAP22, ARHGAP5, KALRN, STXBP5, CDC42EP5, TRIP10, EVI5L, SRGAP3, SIPA1, RASGRP3, SIPA1L1, ARRB1, RAP1GDS1, CDC42EP4, TBC1D30, PLCB1, CHN1, DAB2IP, AGAP3, THY1, ARHGAP15, RASA2, TBC1D9B, ELMOD1, MYO9A, GMIP, ARHGAP42, SGSM1, TBC1D24, RIN3, GDI1, IQ…	1524	279	12075	1.44833	0.137928	0.133926
GOTERM_MF	GO:0004890~GABA-A receptor activity	8	0.00635503	-2.19688	GABRA1, GABRA3, GABRD, GABRG2, GABRA5, GABRR1, GABRB2, GABRA4	1524	19	12075	3.3361	0.137928	0.133926
GOTERM_MF	GO:0005161~platelet-derived growth factor receptor binding	7	0.00724159	-2.14017	VEGFA, PTPRJ, PDGFRB, PDGFC, LYN, PTEN, PDGFD	1524	15	12075	3.69751	0.151556	0.14716
GOTERM_MF	GO:0004385~guanylate kinase activity	6	0.0116775	-1.93265	MPP3, DLG4, MAGI3, DLG3, MPP2, DLG2	1524	12	12075	3.96161	0.228455	0.221828
GOTERM_MF	GO:0035255~ionotropic glutamate receptor binding	8	0.0116957	-1.93197	CANX, SHANK3, DLG4, NETO1, DLG3, DLG2, NSF, SHANK2	1524	21	12075	3.01837	0.228455	0.221828
GOTERM_MF	GO:0051015~actin filament binding	27	0.0132316	-1.87839	TNNC2, MYH14, PPP1R9A, MAP1S, ARPC5, CYFIP1, BIN1, TRPV4, CORO1B, TLN2, ARPC1B, FMNL1, LIMA1, PICK1, SYNE1, ARPC3, PPP1R9B, LCP1, MYO16, FLNA, IQGAP2, CORO1A, SYNE2, CACNB2, ABL2, ADD1, SHROOM1	1524	132	12075	1.62066	0.250119	0.242863
GOTERM_MF	GO:0004675~transmembrane receptor protein serine/threonine kinase activity	7	0.0143442	-1.84332	BMPR2, TGFBR1, ACVR1B, LTBP1, ACVR2A, TGFBR2, ACVRL1	1524	17	12075	3.26251	0.262678	0.255057
GOTERM_MF	GO:0008017~microtubule binding	40	0.0157083	-1.80387	RPS3, MAP1S, KIF13B, FGF13, CAMSAP1, CNN3, MAP7D3, CCSAP, SGIP1, TPPP, PRC1, TRPV4, KIF3C, MARK4, CLIP3, DPYSL2, HOOK1, MAPT, MID1, MAPRE2, CCSER2, KATNA1, TIAM1, DNM1, CKAP5, REEP1, MAP6, KIF21B, CAMSAP2, APC, TPT1, KIF21A, MAPRE3, DCTN1, KIF5B, EML4, MTUS2, MAPRE1, CHP1, KLC3	1524	219	12075	1.44716	0.278941	0.270849
GOTERM_MF	GO:0031420~alkali metal ion binding	7	0.019268	-1.71516	HDAC4, PKLR, ATP1B1, KCNA4, SLC24A4, ATP1A1, SLC24A2	1524	18	12075	3.08126	0.313641	0.304542
GOTERM_MF	GO:0031690~adrenergic receptor binding	7	0.019268	-1.71516	ADRB1, RAPGEF2, DLG4, C1QBP, ARRDC3, MAGI2, ARRB1	1524	18	12075	3.08126	0.313641	0.304542
GOTERM_MF	GO:0017075~syntaxin-1 binding	7	0.019268	-1.71516	UNC13A, CPLX2, STXBP2, DAPK1, STXBP5, STXBP1, NSF	1524	18	12075	3.08126	0.313641	0.304542
GOTERM_MF	GO:0000287~magnesium ion binding	37	0.0223993	-1.64977	FIGNL1, MAST1, PTEN, NT5C1A, ADSS2, CDC42BPA, ITPK1, THG1L, NEK6, STK36, SNRK, ATP11C, NCS1, NUDT3, TESC, RPS6KA5, NME1, FDXACB1, ENO3, RPS6KA2, CDC42BPB, NUDT5, MAP3K8, XXYLT1, DCTPP1, SIK2, DIS3L2, WEE1, PPM1A, PKLR, PGM2, PPA1, ATP9A, NLK, ABL2, PSPH, RPS6KA4	1524	204	12075	1.43706	0.354757	0.344465
GOTERM_MF	GO:0015276~ligand-gated ion channel activity	28	0.0235895	-1.62728	DLG4, SLC17A7, KCNJ9, CHRNA2, AQP1, GRIN2B, GABRA3, GABRD, KCNJ12, PTK2B, CHRNB3, GRIN2A, GABRA4, GABRA1, GABRG2, GRIN2C, DLG3, KCNJ6, JPH3, RYR1, HCN4, KCNJ10, GABRA5, KCNQ5, GABRR1, HCN1, GABRB2, GRIK4	1524	145	12075	1.53	0.363776	0.353222
GOTERM_MF	GO:0004576~oligosaccharyl transferase activity	5	0.028245	-1.54906	DAD1, RPN1, DDOST, MAGT1, OSTC	1524	10	12075	3.96161	0.424399	0.412087
GOTERM_MF	GO:0004143~diacylglycerol kinase activity	5	0.0400473	-1.39743	DGKH, DGKB, DGKG, DGKE, DGKZ	1524	11	12075	3.60147	0.585337	0.568357
GOTERM_MF	GO:0070034~telomerase RNA binding	6	0.0419525	-1.37724	SNRPB, TERT, PINX1, SMG5, GAR1, NOP10	1524	16	12075	2.97121	0.585337	0.568357
GOTERM_MF	GO:0016307~phosphatidylinositol phosphate kinase activity	6	0.0419525	-1.37724	PIK3CG, PIP5KL1, PIK3CB, PIP4K2A, PIP5K1C, PIK3C2B	1524	16	12075	2.97121	0.585337	0.568357
GOTERM_MF	GO:0030551~cyclic nucleotide binding	10	0.0430663	-1.36586	RAPGEF2, STING1, PRKAR1A, CNP, PRKAR1B, HCN1, PDE4A, PRKAR2B, PDE6G, HCN4	1524	38	12075	2.08506	0.586904	0.569878
GOTERM_MF	GO:1901981~phosphatidylinositol phosphate binding	23	0.0444394	-1.35223	DAB2IP, PFN1, ANXA2, NPM1, SNX3, TWF1, ZFYVE28, DENND1A, SYT7, ADAP2, IQGAP2, CERT1, BTK, MYO1G, TECPR1, RPH3A, NCF4, PLCB1, SNX27, SNX20, GAB2, IQGAP1, FRMPD4	1524	120	12075	1.51862	0.591851	0.574682
GOTERM_MF	GO:0008066~glutamate receptor activity	8	0.0456487	-1.34057	GRIN2B, PTK2B, GRIN2C, GRM2, GRM3, GRIN2A, GRM5, GRIK4	1524	27	12075	2.34762	0.594447	0.577202
GOTERM_MF	GO:1990446~U1 snRNP binding	4	0.0473519	-1.32466	SNRPG, SNRPD1, SNRPD2, SNRPC	1524	7	12075	4.52756	0.603222	0.585723
GOTERM_MF	GO:0030515~snoRNA binding	8	0.0643196	-1.19166	WDR3, SNU13, NUDT5, RRP9, GAR1, UTP6, NOP10, BMS1	1524	29	12075	2.18572	0.801943	0.778678
GOTERM_MF	GO:0003689~DNA clamp loader activity	4	0.0688122	-1.16233	RFC4, RFC3, RFC2, DSCC1	1524	8	12075	3.96161	0.821846	0.798004
GOTERM_MF	GO:0001784~phosphotyrosine binding	5	0.0707638	-1.15019	MAPK1, PTPN3, PTPN6, FGR, SAMSN1	1524	13	12075	3.0474	0.821846	0.798004
GOTERM_MF	GO:0030552~cAMP binding	7	0.0726378	-1.13884	RAPGEF2, PRKAR1A, PRKAR1B, HCN1, PDE4A, PRKAR2B, HCN4	1524	24	12075	2.31094	0.821846	0.798004

## Sheet: 3dpl-LGG_shared_genes
Category	Term	Count	PValue	log10(Pvalue)	Genes	List.Total	Pop.Hits	Pop.Total	Fold.Enrichment	Benjamini	FDR
GOTERM_BP	GO:0072599~establishment of protein localization to endoplasmic reticulum	59	2.22918e-46	-45.6519	RPS8, RPS13, SEC61B, RPLP2, RPS7, RPL13A, RPS9, RPS16, RPL34, RPL13, RPL23, RPS24, RPL35, FAU, RPSA, RPS28, RPL12, RPS6, RPS18, RPL19, RPL29, RPS14, RPL21, RPS11, RPL35A, RPS3, RPL23A, RPL27, RPL37, RPS12, RPL17, RPL37A, SEC61A1, RPL39, RPS10, RPL6, RPL30, RPS2, RPS23, RPL18, RPS19, RPL14, RPLP1, RPS4X, RPS25, RPS5, RPL4, RPL10A, RPS3A, RPL7, RPL22, RPL24, RPL3, RPL5, RPLP0, RPS17, RPL10, RPL11, …	822	108	16130	10.7199	9.03264e-43	8.56006e-43
GOTERM_BP	GO:0006612~protein targeting to membrane	67	1.00921e-37	-36.996	MYADM, RPS8, RPS13, SEC61B, RPLP2, RPS7, RPL13A, RPS9, RPS16, RPL34, RPL13, RPL23, TRAM1, RPS24, RPL35, FAU, RPSA, RPS28, RPL12, RPS6, RPS18, RPL19, KCNB2, RPL29, RPS14, RPL21, RPS11, RPL35A, RPS3, RPL23A, RPL27, RPL37, RPS12, RPL17, RPL37A, SEC61A1, RPL39, RPS10, RPL6, RPL30, RPS2, RPS23, RPL18, RPS19, TESC, RPL14, RPLP1, RPS4X, GOLGA7B, RPS25, RPS5, RPL4, RPL10A, RPS3A, RPL7, RPL22, RPL24, RPL3…	822	190	16130	6.91964	2.04466e-34	1.93768e-34
GOTERM_BP	GO:0019083~viral transcription	60	4.51796e-32	-31.3451	RPS8, RPS13, RPLP2, RPS7, RPL13A, RPS9, RPS16, NOTCH1, RPL34, RPL13, REST, RPL23, RPS24, RPL35, FAU, RPSA, RPS28, RPL12, RPS6, RPS18, RPL19, RPL29, RPS14, RPL21, RPS11, RPL35A, RPS3, RPL23A, RPL27, RPL37, RPS12, RPL17, RPL37A, RPL39, RPS10, RPL6, RPL30, RPS2, RPS23, RPL18, RPS19, RPL14, RPLP1, RPS4X, PFN1, RPS25, RPS5, RPL4, RPL10A, RPS3A, RPL7, RPL22, RPL24, RPL3, RPL5, RPLP0, RPS17, RPL10, RPL1…	822	181	16130	6.50482	6.10226e-29	5.78299e-29
GOTERM_BP	GO:0019080~viral gene expression	61	1.90188e-31	-30.7208	RPS8, RPS13, RPLP2, RPS7, RPL13A, RPS9, RPS16, NOTCH1, RPL34, RPL13, REST, RPL23, RPS24, RPL35, FAU, RPSA, RPS28, RPL12, RPS6, RPS18, RPL19, RPL29, RPS14, RPL21, RPS11, EIF3F, RPL35A, RPS3, RPL23A, RPL27, RPL37, RPS12, RPL17, RPL37A, RPL39, RPS10, RPL6, RPL30, RPS2, RPS23, RPL18, RPS19, RPL14, RPLP1, RPS4X, PFN1, RPS25, RPS5, RPL4, RPL10A, RPS3A, RPL7, RPL22, RPL24, RPL3, RPL5, RPLP0, RPS17, RPL1…	822	192	16130	6.23435	1.92661e-28	1.82581e-28
GOTERM_BP	GO:1903047~mitotic cell cycle process	128	2.68401e-27	-26.5712	GTSE1, UBE2C, MCMBP, SMC4, EME1, CKS1B, CDK4, NSL1, MIS12, TACC3, FANCI, MCM8, POLE, RGCC, MELK, KIF15, SMC2, PRIM1, PSMB8, KIFC1, CENPF, EIF4E, CCND1, ERCC6L, WEE1, KIF11, SEPTIN2, MCM5, BMP7, CHEK2, RPS3, PSMA2, SNX18, CEP152, TOP2A, NDC80, SMC5, TTK, KIF20A, CCNB2, AURKB, CDCA8, RAD51B, LRP5, CHEK1, BIRC5, SPC24, RACGAP1, MYBL2, PLK2, NCAPD2, HMMR, NCAPD3, BORA, CAMK2D, CKS2, DHFR, RRM2, GPSM2…	822	890	16130	2.82217	2.17512e-24	2.06132e-24
GOTERM_BP	GO:0090150~establishment of protein localization to membrane	78	3.39804e-27	-26.4688	ROCK2, MYADM, RPS8, RPS13, SEC61B, VAMP3, PPP2R5A, RPLP2, RPS7, RPL13A, RPS9, RPS16, RPL34, ATP1B1, RPL13, RPL23, TRAM1, RPS24, RPL35, SH3GLB1, FAU, RPSA, RPS28, RPL12, RAB13, RPS6, RPS18, RPL19, KCNB2, RPL29, RACK1, RPS14, RPL21, CACNB2, RPS11, PDPK1, RPL35A, RPS3, RPL23A, RPL27, RPL37, RPS12, RPL17, RPL37A, SEC61A1, RPL39, RPS10, RPL6, RPL30, RPS2, RPS23, RPL18, BCL2L11, RPS19, TESC, TP53, RPL1…	822	368	16130	4.1592	2.29481e-24	2.17474e-24
GOTERM_BP	GO:0006364~rRNA processing	65	5.224e-26	-25.282	TSR2, RPS8, RPS13, RPLP2, RPS7, RPL13A, RPS9, RPS16, RPL34, RPL13, RPL23, RPS24, RPL35, FAU, RPSA, RPS28, RPL12, RPS6, SNU13, RPS18, RPL19, RPL29, RPS14, RPL21, RPS11, RPL35A, RPS3, RPL23A, RPL27, RPL37, RPS12, RPP25, RPL17, RPL37A, RPL39, RPS10, RPL6, RPL30, RPS2, RPS23, RPL18, RPS19, GAR1, RPL14, RPLP1, FBL, RPS4X, RPS25, NOP2, RPS5, RPL4, RPL10A, RPS3A, RPL7, RPL22, RPL24, RPL3, RPS27L, RPL5, …	822	269	16130	4.74159	3.02395e-23	2.86574e-23
GOTERM_BP	GO:0006401~RNA catabolic process	62	1.45087e-25	-24.8384	RPS8, RPS13, RPLP2, RPS7, NOCT, RPL13A, RPS9, RPS16, RPL34, RPL13, RPL23, RPS24, RPL35, EIF4E, FAU, RPSA, RPS28, RPL12, RPS6, RPS18, RPL19, RPL29, RPS14, RPL21, RPS11, RPL35A, RPS3, RPL23A, RPL27, RPL37, RNASEH2A, RPS12, EIF3E, RPL17, RPL37A, RPL39, ZFP36L2, RPS10, RPL6, RPL30, RPS2, RPS23, RPL18, RPS19, RPL14, RPLP1, RPS4X, RPS25, RPS5, RPL4, RPL10A, RPS3A, RPL7, RPL22, RPL24, RPL3, RPL5, RPLP0,…	822	249	16130	4.88602	7.34866e-23	6.96418e-23
GOTERM_BP	GO:0072657~protein localization to membrane	86	4.3031e-24	-23.3662	ROCK2, MYADM, FGF13, RPS8, RPS13, SEC61B, VAMP3, PPP2R5A, RPLP2, RPS7, STXBP1, RPL13A, RPS9, RPS16, RPL34, ATP1B1, RPL13, RPL23, APOE, TRAM1, RPS24, RPL35, SH3GLB1, FAU, RPSA, RPS28, RPL12, RAB13, RPS6, RPS18, RPL19, KCNB2, RPL29, RACK1, RPS14, RPL21, CACNB2, RPS11, CACNB3, PDPK1, RPL35A, RPS3, RPL23A, RPL27, RPL37, RPS12, RPL17, RPL37A, SEC61A1, SH3PXD2B, RPL39, RPS10, RPL6, RPL30, RPS2, RPS23, …	822	489	16130	3.45106	1.93735e-21	1.83599e-21
GOTERM_BP	GO:0007067~mitotic nuclear division	76	2.19309e-21	-20.6589	UBE2C, MCMBP, KIF14, SMC4, RB1, NSL1, MIS12, TACC3, HELLS, MIS18A, KIF4A, HAUS6, RGCC, BIRC7, SPC25, KIF15, SMC2, CCNG1, ASPM, KIFC1, DSCC1, CENPF, BUB1, ERCC6L, WEE1, KIF11, RPS6, SEPTIN2, TPX2, DLGAP5, BMP7, SGO1, CHEK2, RPS3, KIF23, SNX18, FBXO5, RCC1, NUSAP1, HAUS1, NDC80, SKA3, SMC5, TTK, CDK1, CCNB2, SNX33, AURKB, CDC20, CDCA8, PBK, FIGN, LRP5, AURKA, KNTC1, CHEK1, BIRC5, SPC24, RACGAP1, MY…	822	431	16130	3.46018	8.88642e-19	8.42148e-19
GOTERM_BP	GO:0034655~nucleobase-containing compound catabolic process	70	8.32896e-21	-20.0794	RPS8, RPS13, RPLP2, RPS7, NOCT, GDA, RPL13A, RPS9, RPS16, RPL34, RPL13, RPL23, MTAP, RPS24, ADPRM, RPL35, EIF4E, FAU, RPSA, RPS28, RPL12, RPS6, RPS18, RPL19, RPL29, RACK1, RPS14, RPL21, RPS11, HMGB2, RPL35A, RPS3, RPL23A, RPL27, DNASE2, RPL37, RNASEH2A, RPS12, EIF3E, RPL17, RPL37A, RPL39, ZFP36L2, RPS10, RPL6, RPL30, RPS2, RPS23, RPL18, RPS19, RPL14, RPLP1, RPS4X, RPS25, NUDT5, CECR2, RPS5, RPL4,…	822	380	16130	3.61474	3.06808e-18	2.90756e-18
GOTERM_BP	GO:0019058~viral life cycle	77	1.45343e-20	-19.8376	ROCK2, HYAL2, RPS8, RPS13, RPLP2, RPS7, HSBP1L1, RPL13A, PPIB, RPS9, CXCR4, RPS16, NOTCH1, RPL34, RPL13, REST, MVB12A, RPL23, APOE, RPS24, CD81, ITGAV, RPL35, FAU, RPSA, RPS28, RPL12, RPS6, RPS18, PRKN, RPL19, RPL29, P4HB, RPS14, RPL21, RPS11, EIF3F, RPL35A, RPS3, RPL23A, RPL27, RPL37, RPS12, TOP2A, TAP1, NECTIN1, RPL17, RPL37A, RPL39, RPS10, RPL6, RPL30, RPS2, RPS23, RPL18, RPS19, HSPA8, RPL14, …	822	455	16130	3.32079	4.90775e-18	4.65098e-18
GOTERM_BP	GO:0000280~nuclear division	88	4.31456e-20	-19.3651	UBE2C, MCMBP, KIF14, SMC4, EME1, RB1, NSL1, MIS12, TACC3, HELLS, MIS18A, PRMT5, KIF4A, HAUS6, RGCC, BIRC7, LFNG, SPC25, KIF15, SMC2, BRCA2, CCNG1, ASPM, KIFC1, DSCC1, CENPF, RAD51, BUB1, ERCC6L, WEE1, KIF11, RPS6, SEPTIN2, TPX2, DLGAP5, BMP7, SGO1, CHEK2, FANCD2, RPS3, KIF23, SNX18, FBXO5, RCC1, NUSAP1, HAUS1, TOP2A, NDC80, SKA3, SMC5, TTK, CDK1, CCNB2, SNX33, AURKB, CDC20, CDCA8, RAD51B, PBK, FI…	822	583	16130	2.96194	1.34482e-17	1.27446e-17
GOTERM_BP	GO:0044772~mitotic cell cycle phase transition	78	5.50296e-18	-17.2594	GTSE1, UBE2C, KIF14, DBF4, CKS1B, RB1, CDK4, CCNE2, TACC3, FANCI, MCM8, PRIM2, POLE, HAUS6, RGCC, MELK, PRIM1, MCM3, PSMB8, CENPF, EIF4E, BUB1, CCND1, WEE1, POLA1, RPS6, TPX2, DLGAP5, SOX4, MCM5, CHEK2, PSMA2, PSME1, CEP152, CDKN2C, FBXO5, RCC1, TYMS, HAUS1, NPM1, NDC80, TTK, CDK1, CCNB2, PSMB9, CDC20, ZFP36L2, RAD51B, ORC1, AURKA, KNTC1, CHEK1, BIRC5, TP53, PLK2, AJUBA, PCNA, FOXM1, ESPL1, HMMR,…	822	514	16130	2.97779	1.59271e-15	1.50938e-15
GOTERM_BP	GO:1902582~single-organism intracellular transport	92	3.32474e-17	-16.4782	F2R, MYADM, HYAL2, RPS8, RPS13, SEC61B, VAMP3, RPLP2, RPS7, RPL13A, RPS9, STAT3, RPS16, RPL34, ATP1B1, RPL13, KIF4A, ABCA1, RPL23, TRAM1, RPS24, CABP1, SRI, TXNIP, RPL35, FAU, RPSA, RPS28, RPL12, CERT1, RPS6, RPS18, PRKCD, RPL19, SMO, KCNB2, RPL29, BMP7, RPS14, RPL21, RPS11, RPL35A, RPS3, BCL6, KIF23, RPL23A, RPL27, RPL37, RPS12, TAP1, RPL17, RPL37A, CDK1, SEC61A1, RPL39, RPS10, RPL6, HIF1A, RBCK…	822	695	16130	2.59756	8.98122e-15	8.51132e-15
GOTERM_BP	GO:0044770~cell cycle phase transition	79	5.84135e-17	-16.2335	GTSE1, UBE2C, KIF14, DBF4, CKS1B, RB1, CDK4, CCNE2, TACC3, FANCI, MCM8, PRIM2, POLE, HAUS6, RGCC, MELK, PRIM1, MCM3, PSMB8, CENPF, SOX11, EIF4E, BUB1, CCND1, WEE1, POLA1, RPS6, TPX2, DLGAP5, SOX4, MCM5, CHEK2, PSMA2, PSME1, CEP152, CDKN2C, FBXO5, RCC1, TYMS, HAUS1, NPM1, NDC80, TTK, CDK1, CCNB2, PSMB9, CDC20, ZFP36L2, RAD51B, ORC1, AURKA, KNTC1, CHEK1, BIRC5, TP53, PLK2, AJUBA, PCNA, FOXM1, ESPL1…	822	547	16130	2.83402	1.41856e-14	1.34434e-14
GOTERM_BP	GO:0006412~translation	87	5.95152e-17	-16.2254	RPS8, RPS13, EEF1B2, RPLP2, RPS7, CDK4, RPL13A, RPS9, STAT3, SLC25A23, RPS16, RPL34, RPL13, EEF1G, EIF3H, RPL23, TARS1, MOV10, RPS24, DARS1, KARS1, RPL35, SOX11, EIF4E, FAU, RPSA, RPS28, RPL12, RPS6, SNU13, RPS18, RPL19, SOX4, RPL29, RACK1, RPS14, RPL21, RPS11, EIF3F, EIF5A2, RPL35A, RPS3, RPL23A, RPL27, CPEB1, RPL37, RPS12, NPM1, UCP2, EEF1D, EIF3E, RPL17, RPL37A, RPL39, RPL22L1, ZFP36L2, RPS10,…	822	641	16130	2.66332	1.41856e-14	1.34434e-14
GOTERM_BP	GO:0043043~peptide biosynthetic process	88	3.2924e-16	-15.4825	RPS8, RPS13, EEF1B2, RPLP2, RPS7, CDK4, RPL13A, NFE2L2, RPS9, STAT3, SLC25A23, RPS16, RPL34, RPL13, EEF1G, EIF3H, RPL23, TARS1, MOV10, RPS24, DARS1, KARS1, RPL35, SOX11, EIF4E, FAU, RPSA, RPS28, RPL12, RPS6, SNU13, RPS18, RPL19, SOX4, RPL29, RACK1, RPS14, RPL21, RPS11, EIF3F, EIF5A2, RPL35A, RPS3, RPL23A, RPL27, CPEB1, RPL37, RPS12, NPM1, UCP2, EEF1D, EIF3E, RPL17, RPL37A, RPL39, RPL22L1, ZFP36L2…	822	667	16130	2.58892	7.41157e-14	7.0238e-14
GOTERM_BP	GO:0033365~protein localization to organelle	106	6.39716e-16	-15.194	GTSE1, F2R, HYAL2, DISC1, RPS8, RPS13, MIS12, RPL13A, SIX4, RPS16, RPS24, CD81, RPL35, OBSCN, RPSA, WDR35, PRKCD, RPL19, RPS14, BMP7, RPL21, RPS11, RPS3, RPL23A, RPL27, RPL37, CNTLN, ESCO2, TTK, RPL17, SEC61A1, AURKB, RPL39, DCLK1, RPL30, RPS2, RPL18, BCL2L11, RPS19, HSPA8, RPL14, AP3B1, PEX5L, RPS5, RPL4, RPL10A, RPL22, KDELR2, NEDD1, RPL5, RCC2, RPLP0, RPL10, DACT3, RPL18A, SEC61B, RPLP2, RPS7,…	822	902	16130	2.30601	1.36428e-13	1.2929e-13
GOTERM_BP	GO:0006605~protein targeting	89	2.25583e-15	-14.6467	F2R, MYADM, HYAL2, RPS8, RPS13, SEC61B, RPLP2, RPS7, RPL13A, RPS9, STAT3, MIS18A, RPS16, RPL34, RPL13, RPL23, TRAM1, RPS24, CABP1, SRI, TXNIP, RPL35, SH3GLB1, FAU, RPSA, RPS28, RPL12, RPS6, RPS18, PRKN, PRKCD, RPL19, SMO, KCNB2, RPL29, BMP7, RPS14, RPL21, RPS11, RPL35A, RPS3, BCL6, RPL23A, RPL27, RPL37, RPS12, RPL17, RPL37A, CDK1, SEC61A1, RPL39, RPS10, RPL6, RBCK1, RPL30, RPS2, RPS23, RPL18, RPS…	822	701	16130	2.49135	4.57031e-13	4.3312e-13
GOTERM_BP	GO:0043604~amide biosynthetic process	90	1.45522e-14	-13.8371	RPS8, RPS13, EEF1B2, RPLP2, RPS7, CDK4, RPL13A, NFE2L2, RPS9, STAT3, SLC25A23, RPS16, RPL34, RPL13, EEF1G, EIF3H, RPL23, TARS1, MOV10, RPS24, DARS1, KARS1, RPL35, SOX11, EIF4E, FAU, RPSA, RPS28, RPL12, RPS6, SNU13, RPS18, PRKCD, RPL19, SOX4, RPL29, RACK1, RPS14, RPL21, RPS11, EIF3F, EIF5A2, RPL35A, RPS3, P2RX7, RPL23A, RPL27, CPEB1, RPL37, RPS12, NPM1, UCP2, EEF1D, EIF3E, RPL17, RPL37A, RPL39, RP…	822	736	16130	2.39954	2.80789e-12	2.66098e-12
GOTERM_BP	GO:0000819~sister chromatid segregation	44	3.28082e-14	-13.484	CENPI, KIF23, UBE2C, MCMBP, NUSAP1, KIF14, TOP2A, NDC80, SMC4, SMC5, TTK, RB1, AURKB, NSL1, CDC20, MIS12, TACC3, CDCA8, KNTC1, BIRC5, DDX11, SPC24, RACGAP1, KIF4A, SPC25, SMC2, CENPH, NCAPG, ESPL1, KIFC1, NCAPD2, DSCC1, CENPF, NCAPD3, KNL1, BUB1, ERCC6L, CENPK, RCC2, DLGAP5, MAPRE1, NCAPH, CEP55, SGO1	822	224	16130	3.85449	6.04268e-12	5.72653e-12
GOTERM_BP	GO:0006518~peptide metabolic process	95	5.71603e-14	-13.2429	RNPEP, RPS8, RPS13, EEF1B2, RPLP2, RPS7, CDK4, RPL13A, NFE2L2, RPS9, STAT3, SLC25A23, RPS16, RPL34, PROS1, RPL13, TRHDE, EEF1G, EIF3H, RPL23, APOE, TARS1, MOV10, RPS24, DARS1, KARS1, RPL35, SOX11, EIF4E, FAU, RPSA, RPS28, RPL12, RPS6, SNU13, RPS18, RPL19, SOX4, ERAP2, CPXM1, RPL29, RACK1, RPS14, RPL21, RPS11, EIF3F, EIF5A2, RPL35A, RPS3, RPL23A, RPL27, CPEB1, RPL37, RPS12, NPM1, UCP2, EEF1D, EIF3…	822	818	16130	2.27894	1.00702e-11	9.54328e-12
GOTERM_BP	GO:0072594~establishment of protein localization to organelle	83	6.41407e-14	-13.1929	F2R, HYAL2, RPS8, RPS13, SEC61B, RPLP2, RPS7, RPL13A, RPS9, STAT3, MIS18A, RPS16, RPL34, RPL13, RPL23, BRCA2, RPS24, CABP1, SRI, TXNIP, RPL35, SH3GLB1, FAU, RPSA, RPS28, RPL12, RPS6, RPS18, PRKN, PRKCD, RPL19, SMO, RPL29, BMP7, RPS14, RPL21, RPS11, RPL35A, RPS3, BCL6, RPL23A, RPL27, RPL37, RPS12, RPL17, RPL37A, CDK1, SEC61A1, RPL39, RPS10, RPL6, RBCK1, RPL30, RPS2, RPS23, RPL18, BCL2L11, RPS19, H…	822	666	16130	2.44549	1.08291e-11	1.02625e-11
GOTERM_BP	GO:0044265~cellular macromolecule catabolic process	106	1.27536e-13	-12.8944	GTSE1, UBE2C, DISC1, RPS8, RPS13, NOCT, FBXO36, ASB2, RPL13A, RPS16, UHRF1, DTL, MVB12A, APOE, PSMB8, RPS24, CD81, RNF19B, RPL35, EIF4E, RPSA, ATP13A2, RPL19, RPS14, KCTD5, RPL21, RPS11, HMGB2, CHEK2, RPS3, PSMA2, RPL23A, RPL27, RPL37, RPL17, AURKB, OPHN1, RPL39, RPL30, RPS2, RPL18, RPS19, BTBD6, PLK2, RPL14, RPS5, RPL4, RPL10A, RPL22, RPL5, RPLP0, RPL10, RPL18A, SEC61B, KIF14, RPLP2, RPS7, NFE2L…	822	976	16130	2.13117	2.06711e-11	1.95896e-11
GOTERM_BP	GO:0006260~DNA replication	49	3.67552e-13	-12.4347	EXO1, RFC4, MCMBP, MMS22L, GLI2, DBF4, EME1, CHAF1B, CCNE2, POLD1, GINS3, MCM8, PRIM2, POLE, SSRP1, DDX11, DTL, PRIM1, MCM3, BRCA2, E2F8, DSCC1, NASP, RAD51, POLA1, PRIMPOL, MCM5, CHEK2, RNASEH2A, TOP2A, NPM1, POLD2, BAZ1A, CDK1, PDGFRA, BARD1, ORC1, CHEK1, GINS4, PCNA, GINS2, MCM10, RRM2, POLE2, E2F7, MCM7, CDC45, MGME1, CDT1	822	290	16130	3.31559	5.72815e-11	5.42846e-11
GOTERM_BP	GO:0006886~intracellular protein transport	107	8.95277e-13	-12.048	GTSE1, F2R, MYADM, HYAL2, ANP32B, RPS8, RPS13, RPL13A, RPS16, TRAM1, RPS24, RPL35, RPSA, PRKCD, RPL19, KCNB2, RPS14, BMP7, RPL21, RPS11, RPS3, RPL23A, RPL27, SNX18, RPL37, TAP1, RPL17, SEC61A1, RPL39, BARD1, RPL30, RPS2, RPL18, RPS19, TESC, HSPA8, RPL14, AP3B1, NAPA, RAMP1, GOLGA7B, PEX5L, RPS5, RPL4, RPL10A, RPL22, CIB1, KDELR2, RPL5, RPLP0, RPL10, SSR1, DACT3, RPL18A, WLS, SEC61B, RPLP2, RPS7, …	822	1020	16130	2.05848	1.34358e-10	1.27328e-10
GOTERM_BP	GO:0015031~protein transport	162	3.73629e-12	-11.4276	GTSE1, F2R, MYADM, HYAL2, TFR2, ANP32B, RPS8, RPS13, LMAN2L, CD276, HADH, TRPV4, NECAP2, RPL13A, RPS16, TNFSF13B, NOTCH1, ITPR2, NOD2, RGCC, ABCA1, MVB12A, APOE, TRAM1, RPS24, CENPF, RPL35, RPSA, WDR35, ATP13A2, PRKCD, RPL19, STXBP5, KCNB2, RPS14, BMP7, RPL21, RPS11, RPS3, P2RX7, RPL23A, RPL27, SNX18, RPL37, TAP1, KIF20A, RPL17, SEC61A1, RPL39, BARD1, HIF1A, RPL30, RPS2, RPL18, LRP5, APBA3, BIRC5…	822	1860	16130	1.70909	5.40694e-10	5.12405e-10
GOTERM_BP	GO:0034660~ncRNA metabolic process	71	5.60393e-12	-11.2515	TSR2, RPS8, RPS13, RPLP2, RPS7, RPL13A, RPS9, SNAPC1, RPS16, RPL34, DDX11, RPL13, RNASEK, RPL23, TARS1, RPS24, DARS1, KARS1, RPL35, FAU, RPSA, RPS28, RPL12, RPS6, SNU13, RPS18, RPL19, RPL29, RPS14, RPL21, RPS11, RPL35A, RPS3, RPL23A, RPL27, RPL37, RPS12, RPP25, RPL17, RPL37A, RPL39, RPS10, RPL6, RPL30, RPS2, RPS23, RPL18, RPS19, GAR1, RPL14, RPLP1, FBL, RPS4X, RPS25, NOP2, RPS5, RPL4, RPL10A, RPS…	822	570	16130	2.44425	7.83005e-10	7.42038e-10
GOTERM_BP	GO:0098813~nuclear chromosome segregation	46	1.3663e-11	-10.8645	CENPI, KIF23, UBE2C, MCMBP, NUSAP1, KIF14, TOP2A, NDC80, SMC4, SMC5, TTK, EME1, RB1, AURKB, NSL1, CDC20, MIS12, TACC3, CDCA8, KNTC1, BIRC5, DDX11, SPC24, RACGAP1, KIF4A, SPC25, SMC2, CENPH, NCAPG, ESPL1, KIFC1, NCAPD2, DSCC1, CENPF, NCAPD3, KNL1, BUB1, ERCC6L, CENPK, RCC2, DLGAP5, MAPRE1, NCAPH, CEP55, SGO1, FANCD2	822	287	16130	3.14513	1.84541e-09	1.74886e-09
GOTERM_BP	GO:0000082~G1/S transition of mitotic cell cycle	39	5.12188e-11	-10.2906	GTSE1, CDKN2C, RCC1, FBXO5, TYMS, NPM1, DBF4, CDK1, RB1, CDK4, CCNE2, ORC1, MCM8, PRIM2, AURKA, POLE, TP53, RGCC, PLK2, PCNA, MCM3, PRIM1, MCM10, EIF4E, CCND1, CAMK2D, POLA1, DHFR, RPS27L, RRM2, RPS6, E2F7, POLE2, MCM7, SOX4, CDC45, MCM5, CHEK2, CDT1	822	224	16130	3.41648	6.69479e-09	6.34452e-09
GOTERM_BP	GO:0007346~regulation of mitotic cell cycle	62	8.568e-11	-10.0671	GTSE1, UBE2C, KIF14, EME1, CKS1B, RB1, CDK4, TACC3, FANCI, PRMT5, RGCC, BRCA2, PSMB8, CENPF, EIF4E, BUB1, CCND1, KIF11, RPS6, TPX2, DLGAP5, SOX4, BMP7, CHEK2, PSMA2, PSME1, FBXO5, RCC1, NUSAP1, TOP2A, NPM1, NDC80, SMC5, TTK, CDK1, MYC, PSMB9, CDC20, ZFP36L2, RAD51B, LRP5, AURKA, KNTC1, CHEK1, BIRC5, TP53, PLK2, PCNA, PTPN3, PKN2, ESPL1, BORA, ASCL1, CAMK2D, RPL24, CKS2, RPS27L, E2F7, RCC2, MKI67,…	822	491	16130	2.47784	1.08492e-08	1.02816e-08
GOTERM_BP	GO:0000070~mitotic sister chromatid segregation	28	2.50799e-09	-8.60067	KIF23, UBE2C, NUSAP1, KIF14, NDC80, SMC4, SMC5, TTK, RB1, AURKB, NSL1, MIS12, TACC3, CDCA8, RACGAP1, KIF4A, SMC2, NCAPG, ESPL1, KIFC1, NCAPD2, DSCC1, CENPF, NCAPD3, BUB1, DLGAP5, NCAPH, CEP55	822	142	16130	3.8693	3.07951e-07	2.91839e-07
GOTERM_BP	GO:0007062~sister chromatid cohesion	26	5.49544e-09	-8.26	CENPI, MCMBP, NDC80, SMC5, RB1, AURKB, NSL1, CDC20, MIS12, CDCA8, KNTC1, BIRC5, DDX11, SPC24, SPC25, CENPH, ESPL1, DSCC1, CENPF, KNL1, BUB1, ERCC6L, CENPK, RCC2, MAPRE1, SGO1	822	128	16130	3.9859	6.54927e-07	6.20661e-07
GOTERM_BP	GO:0006270~DNA replication initiation	14	7.28707e-09	-8.13745	MCM3, PRIM1, GINS2, MCM10, CCNE2, POLA1, ORC1, POLE2, PRIM2, MCM7, POLE, CDC45, MCM5, GINS4	822	35	16130	7.84915	8.43634e-07	7.99495e-07
GOTERM_BP	GO:0010564~regulation of cell cycle process	65	1.06188e-08	-7.97393	GTSE1, ROCK2, UBE2C, KIF14, RB1, CDK4, WDR76, TACC3, FANCI, DDX11, PRMT5, RGCC, BRCA2, E2F8, PSMB8, CENPF, SOX11, SH3GLB1, BUB1, CCND1, KIF11, TPX2, DLGAP5, SOX4, BMP7, CHEK2, PSMA2, PSME1, KIF23, FBXO5, RCC1, NUSAP1, BIN1, NPM1, NDC80, SMC5, TTK, CDK1, AURKB, PSMB9, CDC20, ZFP36L2, RAD51B, LRP5, AURKA, KNTC1, CHEK1, BIRC5, RACGAP1, TP53, PLK2, PCNA, RPS6KA2, PKN2, FOXM1, ESPL1, BORA, CAMK2D, RPS…	822	595	16130	2.14367	1.1952e-06	1.13267e-06
GOTERM_BP	GO:0000075~cell cycle checkpoint	35	1.82494e-08	-7.73875	GTSE1, TOP2A, NPM1, NDC80, TTK, EME1, CDK1, RB1, WDR76, AURKB, CCNE2, FANCI, AURKA, KNTC1, CHEK1, BIRC5, TP53, RGCC, DTL, PLK2, PCNA, CENPF, KNL1, SOX11, CCND1, BUB1, RPL24, RPS27L, RPS6, E2F7, SOX4, CCNA2, CDC45, CHEK2, CDT1	822	229	16130	2.99913	1.99855e-06	1.89399e-06
GOTERM_BP	GO:0016071~mRNA metabolic process	70	1.88714e-08	-7.7242	RPS8, RPS13, RPLP2, RPS7, NOCT, YBX1, RPL13A, RPS9, RPS16, RPL34, PRMT5, RPL13, RPL23, MOV10, RPS24, RPL35, EIF4E, FAU, RPSA, RPS28, RPL12, RPS6, SNU13, RPS18, RPL19, RPL29, RPS14, RPL21, RPS11, RPL35A, RPS3, RPL23A, RPL27, CPEB1, RPL37, RPS12, EIF3E, RPL17, RPL37A, RPL39, BARD1, ZFP36L2, SNRPG, RPS10, RPL6, RPL30, RPS2, RPS23, RPL18, RPS19, HSPA8, RPL14, RPLP1, RAVER1, RPS4X, RPS25, RPS5, RPL4, …	822	672	16130	2.04405	2.01228e-06	1.907e-06
GOTERM_BP	GO:0042255~ribosome assembly	17	3.19104e-08	-7.49607	RPL23A, NPM1, RPS5, RPSA, RPL12, RPS28, RPL24, RPL3, RPS27L, RPL6, RPS10, RPL5, RPS19, RPS14, RPS17, RPL10, RPL11	822	60	16130	5.55981	3.31541e-06	3.14194e-06
GOTERM_BP	GO:0000226~microtubule cytoskeleton organization	51	3.4607e-08	-7.46084	ROCK2, DISC1, FGF13, KIF14, MAP7D3, STMN3, TRPV4, TACC3, KIF4A, HAUS6, BIRC7, BRCA2, ASPM, KIFC1, WEE1, KIF11, TPX2, SGO1, CHEK2, RPS3, KIF23, CEP152, FBXO5, RCC1, NUSAP1, HAUS1, NPM1, NDC80, CNTLN, SKA3, KIF20A, TTK, CDK1, AURKB, FIGN, AURKA, CHEK1, BIRC5, RACGAP1, MYBL2, PLK2, KATNA1, DNAAF1, ESPL1, NUMA1, RSPH9, SASS6, FLNA, CIB1, GPSM2, MAPRE1	822	428	16130	2.33824	3.50569e-06	3.32227e-06
GOTERM_BP	GO:0035556~intracellular signal transduction	193	1.00061e-07	-6.99974	F2R, RFC4, EXO1, MYADM, DISC1, FGF13, ARHGEF9, STK36, CXCR4, NOTCH1, ITPR2, RHOV, PRMT5, LIMK1, RGCC, MELK, MCTP1, APOE, DUSP22, MAPKAPK3, PRKD3, PRKCD, CHEK2, RPS3, PSMA2, DGKH, HTR5A, IRAK4, RASGRF2, MYC, STAT4, AURKB, BARD1, BCL2L11, ADRB1, RPS6KA2, PKN2, PEX5L, VANGL2, CMKLR1, GSDME, NCK1, CAMK2D, DHCR24, KCNH4, CIB1, GNA13, ROCK2, KIF14, RB1, DVL2, ARHGAP11A, STAT3, DLG5, HELLS, ID1, GLIPR2,…	822	2657	16130	1.42537	9.88893e-06	9.37154e-06
GOTERM_BP	GO:0006259~DNA metabolic process	90	1.13692e-07	-6.94427	EXO1, RFC4, MCMBP, MMS22L, GLI2, DBF4, FANCC, EME1, CHAF1B, CCNE2, POLD1, HELLS, MIS18A, GINS3, FANCI, MCM8, PRIM2, UHRF1, POLE, SSRP1, DDX11, PRMT5, RGCC, DTL, NEIL3, PRIM1, MCM3, BRCA2, E2F8, DSCC1, CENPF, NASP, RAD51, EEPD1, POLA1, PRKCD, PRIMPOL, MCM5, CHEK2, HMGB2, FANCD2, STAT6, RPS3, BCL6, DNASE2, TYMS, RNASEH2A, TOP2A, ESCO2, NPM1, POLD2, ID3, SMC5, BAZ1A, CDK1, MYC, PDGFRA, AURKB, PARP9,…	822	995	16130	1.77493	1.09686e-05	1.03947e-05
GOTERM_BP	GO:0042273~ribosomal large subunit biogenesis	17	1.71478e-07	-6.76579	RPL35A, RPL23A, SDAD1, NOP2, RPL10A, RPL35, RPL12, RPL7, RPL24, RPL3, RPL6, SNU13, RPL5, FTSJ3, RPL10, RPL11, RPL14	822	67	16130	4.97894	1.61588e-05	1.53134e-05
GOTERM_BP	GO:0022616~DNA strand elongation	12	2.67879e-07	-6.57206	POLD1, RFC4, PCNA, PRIM1, POLA1, RNASEH2A, GINS3, POLD2, PRIM2, POLE, GINS2, GINS4	822	32	16130	7.35858	2.46692e-05	2.33785e-05
GOTERM_BP	GO:0007093~mitotic cell cycle checkpoint	26	4.64098e-07	-6.33339	GTSE1, TOP2A, NPM1, NDC80, TTK, EME1, CDK1, RB1, FANCI, AURKA, KNTC1, CHEK1, TP53, RGCC, PLK2, PCNA, CENPF, CCND1, BUB1, RPL24, RPS27L, RPS6, E2F7, SOX4, CCNA2, CHEK2	822	159	16130	3.20877	4.17894e-05	3.9603e-05
GOTERM_BP	GO:0051225~spindle assembly	19	5.18623e-07	-6.28515	RPS3, KIF23, RCC1, FBXO5, HAUS1, ASPM, KIFC1, AURKB, FLNA, KIF11, TPX2, AURKA, BIRC5, RACGAP1, CHEK2, KIF4A, MYBL2, HAUS6, BIRC7	822	90	16130	4.14261	4.56839e-05	4.32937e-05
GOTERM_BP	GO:0007088~regulation of mitotic nuclear division	24	6.00395e-07	-6.22156	UBE2C, RCC1, FBXO5, NUSAP1, NDC80, ESPL1, CENPF, SMC5, TTK, BORA, RB1, BUB1, TACC3, KIF11, LRP5, DLGAP5, AURKA, KNTC1, CHEK1, MKI67, BIRC5, BMP7, PRMT5, RGCC	822	140	16130	3.36392	5.17617e-05	4.90535e-05
GOTERM_BP	GO:0045787~positive regulation of cell cycle	41	6.3281e-07	-6.19873	GTSE1, ROCK2, KIF23, UBE2C, NUSAP1, KIF14, NPM1, NDC80, SMC5, CDK1, MYC, CKS1B, RB1, CDK4, AURKB, RAD51B, LRP5, BCL2L11, AURKA, BIRC5, DDX11, RACGAP1, TP53, RGCC, PLK2, PCNA, PKN2, BRCA2, E2F8, ESPL1, GDPD5, EIF4E, CCND1, ASCL1, CKS2, E2F7, RCC2, DLGAP5, SOX4, CDC45, CHEK2	822	339	16130	2.37327	5.34197e-05	5.06248e-05
GOTERM_BP	GO:0051783~regulation of nuclear division	26	8.42246e-07	-6.07456	UBE2C, RCC1, FBXO5, NUSAP1, NDC80, SMC5, TTK, RB1, CDC20, TACC3, LRP5, AURKA, KNTC1, CHEK1, BIRC5, PRMT5, RGCC, RPS6KA2, ESPL1, CENPF, BORA, BUB1, KIF11, DLGAP5, MKI67, BMP7	822	164	16130	3.11094	6.96486e-05	6.60046e-05
GOTERM_BP	GO:0097421~liver regeneration	11	9.14239e-07	-6.03894	CCND1, PCNA, PTPN3, TYMS, RPS24, RPS16, UCP2, RPL19, AURKA, PRMT5, MYC	822	29	16130	7.44316	7.40899e-05	7.02135e-05
GOTERM_BP	GO:0048513~animal organ development	215	1.00931e-06	-5.99598	DISC1, FGF13, RHO, EGR3, SMAD5, CD276, SOX3, TFEB, CDK4, TACC3, STK36, NOTCH1, POLE, ORAI1, PRMT5, RGCC, MELK, PHGDH, GNG5, MDK, GDPD5, EIF4E, MMP14, MFSD2A, RPL19, RPS14, HMGB2, STAT6, PSMA2, HTR5A, TOP2A, ESCO2, EFHC1, MYC, CCNB2, SH3PXD2B, BCL2L11, RPS19, HIVEP3, FBN2, AP3B1, ENO3, PTPN3, PFN1, RPS6KA2, MICAL2, VANGL2, GSDME, PGF, CAMK2D, ASCL1, DHCR24, NAB1, PRRX1, RPL22, GPSM2, CIB1, INPPL1,…	822	3129	16130	1.34833	8.01907e-05	7.59951e-05
GOTERM_BP	GO:0031100~organ regeneration	17	1.07498e-06	-5.9686	PCNA, PTPN3, TYMS, RPS24, UCP2, CDK1, MYC, PGF, CDK4, CCND1, RPS16, NOTCH1, RPL19, AURKA, MKI67, CCNA2, PRMT5	822	76	16130	4.38933	8.37658e-05	7.93831e-05
GOTERM_BP	GO:1901990~regulation of mitotic cell cycle phase transition	38	1.47164e-06	-5.8322	PSME1, PSMA2, GTSE1, UBE2C, FBXO5, KIF14, NPM1, NDC80, TTK, CDK1, RB1, CDK4, PSMB9, CDC20, ZFP36L2, RAD51B, FANCI, AURKA, KNTC1, BIRC5, TP53, RGCC, PLK2, PCNA, PSMB8, ESPL1, CENPF, CCND1, CAMK2D, BUB1, RPS27L, E2F7, RCC2, DLGAP5, SOX4, CCNA2, CDC45, CHEK2	822	312	16130	2.38997	0.000112511	0.000106625
GOTERM_BP	GO:0090068~positive regulation of cell cycle process	33	1.58203e-06	-5.80078	GTSE1, ROCK2, KIF23, UBE2C, NUSAP1, KIF14, NPM1, NDC80, SMC5, CDK1, RB1, CDK4, AURKB, RAD51B, LRP5, AURKA, BIRC5, DDX11, RACGAP1, TP53, RGCC, PLK2, PCNA, PKN2, E2F8, ESPL1, CCND1, E2F7, RCC2, DLGAP5, SOX4, CDC45, CHEK2	822	251	16130	2.5799	0.000118113	0.000111933
GOTERM_BP	GO:0009966~regulation of signal transduction	191	1.60321e-06	-5.79501	PRCP, RFC4, F2R, EXO1, MFNG, MNT, MYADM, HYAL2, DISC1, RHO, GPAT3, PAK2, ARHGAP31, ARHGEF9, TRPV4, SRPX, STK36, CXCR4, NOTCH1, RHOV, NOD2, PRMT5, CPNE1, ABCA1, MVB12A, APOE, TSKU, DUSP22, MAPKAPK3, PSMB8, ITGAV, CD81, GDPD5, OBSCN, MMP14, CCND1, PIK3CB, RASGRF1, SALL1, PRKCD, PIP5K1B, BMP7, HMGB2, CHEK2, ARHGAP17, FANCD2, PDPK1, RPS3, PSMA2, P2RX7, NPTN, BDNF, IRAK4, RASGRF2, TCF7L1, TTK, MYC, PD…	822	2728	16130	1.37389	0.000118113	0.000111933
GOTERM_BP	GO:1902850~microtubule cytoskeleton organization involved in mitosis	13	1.694e-06	-5.77109	KIF23, KIFC1, AURKB, FLNA, TACC3, KIF11, TPX2, BIRC5, RACGAP1, CHEK2, KIF4A, MYBL2, BIRC7	822	45	16130	5.66883	0.000122573	0.00011616
GOTERM_BP	GO:0007051~spindle organization	20	2.62214e-06	-5.58134	RPS3, KIF23, RCC1, FBXO5, HAUS1, ASPM, KIFC1, TTK, AURKB, FLNA, KIF11, TPX2, AURKA, BIRC5, RACGAP1, CHEK2, KIF4A, MYBL2, HAUS6, BIRC7	822	110	16130	3.56779	0.000186402	0.00017665
GOTERM_BP	GO:0007052~mitotic spindle organization	12	3.30096e-06	-5.48136	SPC25, KIF23, KIF11, RCC1, GPSM2, NDC80, AURKA, TTK, RACGAP1, KIF4A, AURKB, PLK2	822	40	16130	5.88686	0.000230612	0.000218546
GOTERM_BP	GO:1901987~regulation of cell cycle phase transition	39	3.37043e-06	-5.47231	PSME1, PSMA2, GTSE1, UBE2C, FBXO5, KIF14, NPM1, NDC80, TTK, CDK1, RB1, CDK4, PSMB9, CDC20, ZFP36L2, RAD51B, FANCI, AURKA, KNTC1, BIRC5, TP53, RGCC, PLK2, PCNA, PSMB8, ESPL1, CENPF, SOX11, CCND1, CAMK2D, BUB1, RPS27L, E2F7, RCC2, DLGAP5, SOX4, CCNA2, CDC45, CHEK2	822	336	16130	2.27765	0.000231474	0.000219364
GOTERM_BP	GO:0071897~DNA biosynthetic process	28	3.83111e-06	-5.41668	EXO1, RFC4, TYMS, POLD2, MYC, AURKB, POLD1, BARD1, RAD51B, PTK2B, PRIM2, POLE, TK1, GAR1, TP53, RGCC, DTL, PCNA, BRCA2, DSCC1, RAD51AP1, CENPF, RAD51, PIF1, POLA1, POLE2, PRIMPOL, PRKD2	822	201	16130	2.73353	0.000258728	0.000245191
GOTERM_BP	GO:0006915~apoptotic process	131	4.57501e-06	-5.33961	F2R, DAD1, MNT, HYAL2, ANP32B, EGR3, PAK2, ARHGEF9, CDK4, SIX4, SRPX, CXCR4, NOTCH1, NOD2, RGCC, MELK, APOE, DUSP22, NUPR1, ITGAV, CHL1, MDK, OBSCN, CORO1A, PRKCD, BMP7, HMGB2, CHEK2, PDPK1, RPS3, P2RX7, BDNF, RASGRF2, TOP2A, PAK6, MYC, AURKB, TFAP2A, STK17B, ANXA5, STK25, BARD1, HIF1A, BCL2L11, LRP5, CHEK1, BIRC5, PLK2, RPS6KA2, PKN2, GSDME, CAMK2D, NCK1, ASCL1, DHCR24, CIB1, HYOU1, GABRB2, KIF1…	822	1747	16130	1.47143	0.000303901	0.000288001
GOTERM_BP	GO:0042274~ribosomal small subunit biogenesis	15	6.6348e-06	-5.17817	TSR2, RPS8, RPS24, RPS5, RPS7, RPSA, RPS28, RPS27L, RPS6, RPS10, SNU13, RPS16, RPS19, RPS14, RPS17	822	68	16130	4.32857	0.000430756	0.000408219
GOTERM_BP	GO:0045930~negative regulation of mitotic cell cycle	29	6.69734e-06	-5.1741	GTSE1, TOP2A, NPM1, NDC80, TTK, EME1, CDK1, RB1, ZFP36L2, FANCI, AURKA, KNTC1, CHEK1, TP53, RGCC, PLK2, PCNA, PTPN3, CENPF, CCND1, BUB1, RPL24, RPS27L, RPS6, E2F7, SOX4, CCNA2, BMP7, CHEK2	822	219	16130	2.59846	0.000430756	0.000408219
GOTERM_BP	GO:0007399~nervous system development	155	7.15689e-06	-5.14528	DISC1, ACSL4, FGF13, ANP32B, EGR3, SOX3, PAK2, TSPAN2, GDA, TRPV4, BAIAP2, TACC3, GART, SIX4, STK36, CXCR4, NCS1, NOTCH1, LIMK1, PRMT5, CPNE1, DMRTA2, FEZF2, APOE, TSKU, PHGDH, GFAP, B3GNT2, CENPF, CHL1, MDK, GDPD5, EIF4E, MMP14, VCAN, MYCL, MFSD2A, WEE1, RASGRF1, SEPTIN2, SALL1, SRPX2, SERPINI1, PLOD3, BMP7, HMGB2, FANCD2, PTPRZ1, HTR5A, NPTN, KCNA2, BDNF, EFHC1, MYC, TFAP2A, OPHN1, STK25, HIF1A…	822	2170	16130	1.40163	0.000447413	0.000424004
GOTERM_BP	GO:1902531~regulation of intracellular signal transduction	128	7.17716e-06	-5.14405	RFC4, F2R, EXO1, MYADM, HYAL2, GPAT3, ARHGAP31, ARHGEF9, TRPV4, CXCR4, NOTCH1, RHOV, NOD2, PRMT5, CPNE1, ABCA1, APOE, DUSP22, MAPKAPK3, CD81, OBSCN, PIK3CB, RASGRF1, PRKCD, PIP5K1B, BMP7, CHEK2, ARHGAP17, PDPK1, RPS3, P2RX7, NPTN, IRAK4, RASGRF2, MYC, PDGFRA, AURKB, OPHN1, STK25, BARD1, HIF1A, BCL2L11, CHEK1, RACGAP1, PLK2, ADRB1, PEX5L, VANGL2, CMKLR1, GSDME, CAMK2D, NCK1, CIB1, C1QL4, HYOU1, WL…	822	1714	16130	1.46542	0.000447413	0.000424004
GOTERM_BP	GO:0016477~cell migration	95	8.93583e-06	-5.04886	STK10, PRCP, GTSE1, ROCK2, F2R, MPP1, MYADM, ETS1, HYAL2, DISC1, FGF13, EGR3, TRPV4, JAM2, NFE2L2, STAT3, SIX4, CXCR4, ID1, GLIPR2, NOTCH1, ATP1B1, PROS1, ADAM9, TNFRSF11A, PKN1, PSTPIP1, RGCC, FEZF2, APOE, ASPM, ITGAV, CHL1, HAS1, MDK, MMP14, VCAN, RAB13, PIK3CB, WASF2, FMNL3, CORO1A, SRPX2, PRKCD, SMO, RACK1, HMGB2, GNA12, FOXJ1, PDPK1, IRAK4, LOXL2, EFHC1, CNN2, CDK1, MYC, PDGFRA, OPHN1, MATK,…	822	1184	16130	1.57447	0.000548606	0.000519903
GOTERM_BP	GO:0090307~mitotic spindle assembly	12	9.08516e-06	-5.04167	FLNA, KIF23, KIF11, TPX2, KIFC1, BIRC5, RACGAP1, CHEK2, KIF4A, MYBL2, BIRC7, AURKB	822	44	16130	5.35169	0.000549449	0.000520702
GOTERM_BP	GO:0000910~cytokinesis	20	9.80416e-06	-5.00859	ROCK2, KIF23, SNX18, BRCA2, PKN2, NUSAP1, KIF14, E2F8, CECR2, ESPL1, KIF20A, SNX33, AURKB, RALB, RASA1, E2F7, CEP55, BIRC5, RACGAP1, KIF4A	822	120	16130	3.27048	0.000584213	0.000553647
GOTERM_BP	GO:0051960~regulation of nervous system development	68	1.08945e-05	-4.96279	DISC1, FGF13, KIF14, GLI2, SOX3, CTNNA1, DVL2, TRPV4, BAIAP2, NFE2L2, STAT3, SIX4, CXCR4, ID1, NOTCH1, NCS1, LIMK1, PRMT5, CPNE1, DMRTA2, REST, FEZF2, TRPC5, APOE, ASPM, RFX4, GFAP, GDPD5, SOX11, EIF4E, MYCL, SRPX2, PRKN, SMO, BMP7, HMGB2, TBX6, PTPRZ1, GPR161, BCL6, NPTN, BDNF, BIN1, NGEF, VIM, NECTIN1, CDK1, MYC, CDC20, STK25, DLL1, PTK2B, HIF1A, RIMS1, RTN4R, DVL3, CHN1, ASIC2, CPNE5, PLK2, VA…	822	769	16130	1.73518	0.000639776	0.000606303
GOTERM_BP	GO:0010948~negative regulation of cell cycle process	30	1.3791e-05	-4.8604	GTSE1, FBXO5, NPM1, NDC80, TTK, CDK1, RB1, CDK4, AURKB, ZFP36L2, FANCI, AURKA, CHEK1, TP53, RGCC, PLK2, PCNA, RPS6KA2, E2F8, ESPL1, CENPF, SOX11, CCND1, BUB1, RPS27L, E2F7, SOX4, CCNA2, BMP7, CHEK2	822	240	16130	2.45286	0.000798304	0.000756536
GOTERM_BP	GO:0045931~positive regulation of mitotic cell cycle	20	1.58839e-05	-4.79904	UBE2C, BRCA2, PKN2, NUSAP1, NDC80, ESPL1, SMC5, CDK1, RB1, CDK4, EIF4E, CCND1, RAD51B, LRP5, RCC2, DLGAP5, AURKA, BIRC5, CDC45, RGCC	822	124	16130	3.16498	0.000906502	0.000859074
GOTERM_BP	GO:0042981~regulation of apoptotic process	107	1.87277e-05	-4.72752	F2R, DAD1, MNT, HYAL2, ANP32B, EGR3, PAK2, ARHGEF9, CDK4, SIX4, SRPX, NOTCH1, NOD2, RGCC, MELK, APOE, NUPR1, ITGAV, CHL1, MDK, HS1BP3, OBSCN, CORO1A, PRKCD, BMP7, HMGB2, CHEK2, PDPK1, RPS3, P2RX7, BDNF, RASGRF2, TOP2A, MYC, AURKB, TFAP2A, STK17B, ANXA5, BARD1, HIF1A, BCL2L11, LRP5, BIRC5, PLK2, RPS6KA2, GSDME, CAMK2D, NCK1, ASCL1, DHCR24, CIB1, HYOU1, GABRB2, ETS1, KIF14, GLI2, CTNNA1, STXBP1, NF…	822	1400	16130	1.49975	0.00105395	0.000998809
GOTERM_BP	GO:0000086~G2/M transition of mitotic cell cycle	25	1.95996e-05	-4.70775	CEP152, HAUS1, CDK1, CCNB2, CDK4, RAD51B, FANCI, AURKA, CHEK1, BIRC5, HAUS6, MELK, AJUBA, FOXM1, HMMR, CNTRL, BORA, CCND1, WEE1, NEDD1, TPX2, RCC2, MAPRE1, CCNA2, CHEK2	822	183	16130	2.68072	0.00108791	0.00103099
GOTERM_BP	GO:0043067~regulation of programmed cell death	107	2.73446e-05	-4.56313	F2R, DAD1, MNT, HYAL2, ANP32B, EGR3, PAK2, ARHGEF9, CDK4, SIX4, SRPX, NOTCH1, NOD2, RGCC, MELK, APOE, NUPR1, ITGAV, CHL1, MDK, HS1BP3, OBSCN, CORO1A, PRKCD, BMP7, HMGB2, CHEK2, PDPK1, RPS3, P2RX7, BDNF, RASGRF2, TOP2A, MYC, AURKB, TFAP2A, STK17B, ANXA5, BARD1, HIF1A, BCL2L11, LRP5, BIRC5, PLK2, RPS6KA2, GSDME, CAMK2D, NCK1, ASCL1, DHCR24, CIB1, HYOU1, GABRB2, ETS1, KIF14, GLI2, CTNNA1, STXBP1, NF…	822	1413	16130	1.48595	0.0014973	0.00141896
GOTERM_BP	GO:0022008~neurogenesis	109	2.80336e-05	-4.55232	DISC1, ACSL4, FGF13, SOX3, PAK2, TSPAN2, TRPV4, BAIAP2, SIX4, CXCR4, NCS1, NOTCH1, LIMK1, PRMT5, CPNE1, DMRTA2, FEZF2, APOE, TSKU, PHGDH, GFAP, B3GNT2, CHL1, GDPD5, EIF4E, MMP14, VCAN, MYCL, WEE1, RASGRF1, SEPTIN2, SALL1, BMP7, HMGB2, PTPRZ1, NPTN, BDNF, MYC, OPHN1, STK25, HIF1A, DCLK1, BTBD6, RACGAP1, CPNE5, PLK2, NAPA, VANGL2, GSDME, NCK1, ASCL1, PRRX1, NAB1, DHFR, CIB1, CRABP2, GABRB2, MANF, G…	822	1447	16130	1.47816	0.00151456	0.00143532
GOTERM_BP	GO:0048468~cell development	140	2.84421e-05	-4.54604	MYADM, DISC1, ACSL4, FGF13, LOXL3, SMAD5, SOX3, PAK2, CBFB, TSPAN2, TRPV4, BAIAP2, SIX4, CXCR4, NCS1, NOTCH1, LIMK1, PRMT5, CPNE1, DMRTA2, RGCC, FEZF2, APOE, TSKU, PHGDH, ITGAV, GFAP, B3GNT2, CHL1, GDPD5, EIF4E, OBSCN, MYCL, MFSD2A, WEE1, RASGRF1, SEPTIN2, SALL1, PLOD3, BMP7, HMGB2, PTPRZ1, PDPK1, NPTN, BDNF, MYC, PDGFRA, OPHN1, STK25, HIF1A, DCLK1, LRP5, RPS19, OCA2, CPNE5, PLK2, RPS6KA2, VANGL2…	822	1968	16130	1.39594	0.00151642	0.00143708
GOTERM_BP	GO:0006396~RNA processing	75	4.01026e-05	-4.39683	TSR2, RPS8, RPS13, RPLP2, RPS7, NOCT, YBX1, RPL13A, RPS9, RPS16, RPL34, PRMT5, RPL13, RPL23, RPS24, IVNS1ABP, KARS1, RPL35, FAU, RPSA, RPS28, RPL12, RPS6, SNU13, RPS18, RPL19, RPL29, RPS14, RPL21, RPS11, RPL35A, RPS3, RPL23A, RPL27, CPEB1, RPL37, RPS12, RPP25, RPL17, RPL37A, RPL39, BARD1, SNRPG, RPS10, RPL6, RPL30, RPS2, RPS23, RPL18, RPS19, GAR1, HSPA8, RPL14, RPLP1, FBL, RAVER1, RPS4X, RPS25, N…	822	910	16130	1.61727	0.00211033	0.00199992
GOTERM_BP	GO:0044267~cellular protein metabolic process	302	4.37642e-05	-4.35888	F2R, DAD1, MYADM, DISC1, FGF13, RHO, RPS13, SMAD5, PAK2, CDK4, CDK15, PHF19, RPL13A, SLC25A23, STK36, CXCR4, UHRF1, PROS1, PRMT5, LIMK1, RGCC, MELK, EIF3H, APOE, DUSP22, MAPKAPK3, TARS1, PRKD3, B3GNT2, KLHL29, TFPI, EIF4E, MMP14, RPSA, MMP15, PRKCD, RPL19, RPS14, KCTD5, RPL21, RPS11, CHEK2, RPS3, PSMA2, RPL23A, CPEB1, IRAK4, RASGRF2, RPL37, TOP2A, ESCO2, PAK6, TWF1, MYC, AURKB, RPL39, BARD1, CDCA…	822	4900	16130	1.20941	0.00227349	0.00215454
GOTERM_BP	GO:0007423~sensory organ development	48	5.18338e-05	-4.28539	RHO, SLC17A7, ANP32B, GLI2, SOX3, LAMB2, VIM, NECTIN1, DVL2, PDGFRA, CDK4, CLIC5, TFAP2A, SH3PXD2B, OLFM3, DLL1, STAT3, COL4A1, SIX4, HIF1A, MEGF11, DVL3, NOTCH1, LRP5, BCL2L11, PPP1R13L, NAGLU, FBN2, NKD1, TSKU, TSHR, VANGL2, THY1, CECR2, PTK7, GSDME, SOX11, SPARC, ASCL1, MYCL, FRS2, PRRX1, RPL24, SALL1, LRTOMT, CCNA2, BMP7, GABRB2	822	507	16130	1.85779	0.00265862	0.00251952
GOTERM_BP	GO:0000028~ribosomal small subunit assembly	8	5.35142e-05	-4.27153	RPSA, RPS28, RPS27L, RPS10, RPS5, RPS19, RPS14, RPS17	822	21	16130	7.47538	0.0027105	0.00256868
GOTERM_BP	GO:0007076~mitotic chromosome condensation	7	5.74952e-05	-4.24037	SMC2, NCAPG, NUSAP1, NCAPD2, SMC4, NCAPH, NCAPD3	822	15	16130	9.15734	0.00287618	0.0027257
GOTERM_BP	GO:0006310~DNA recombination	30	7.04483e-05	-4.15213	BCL6, EXO1, RFC4, MMS22L, TOP2A, POLD2, SMC5, EME1, POLD1, BARD1, RAD51B, FIGN, MCM8, PRIM2, CHEK1, POLE, GINS4, PCNA, PRIM1, BRCA2, PSMC3IP, RAD51AP1, GINS2, RAD51, PIF1, POLA1, POLE2, CDC45, HMGB2, STAT6	822	262	16130	2.24689	0.00348118	0.00329904
GOTERM_BP	GO:0043549~regulation of kinase activity	66	7.81247e-05	-4.10721	F2R, UBE2C, HYAL2, FGF13, KIF14, PPP2R5A, PAK2, GRM1, CKS1B, RB1, DVL2, CDK4, CCNE2, LDB2, CXCR4, ADAM9, TNFRSF11A, NOD2, PKN1, RGCC, BIRC7, MAP3K21, MAP3K1, APOE, RBL1, DUSP22, MAPKAPK3, CCNG1, CD81, SH3GLB1, STK38, CCND1, RALB, PIK3CB, TPX2, PRKN, PRKCD, BMP7, RACK1, PDPK1, RPS3, P2RX7, CDKN2C, NPM1, CDK1, PDGFRA, RGS4, PTK2B, RTN4R, DVL3, LRP5, TESC, DIRAS1, RPLP1, AJUBA, VANGL2, THY1, MIDN, S…	822	788	16130	1.64354	0.00373293	0.00353763
GOTERM_BP	GO:0072359~circulatory system development	76	7.83068e-05	-4.1062	PRCP, ROCK2, ETS1, EGR3, ANP32B, GLI2, TGFBI, PLCD1, DVL2, NFE2L2, COL4A1, VEZF1, MAML1, ID1, NOTCH1, MMP2, REST, RGCC, APOE, GNG5, E2F8, ITGAV, XIRP2, SRI, SOX11, MMP14, CERT1, PIK3CB, WASF2, FMNL3, SALL1, SRPX2, RSPO3, SMO, SOX4, BMP7, FOXJ1, LOXL2, ID3, KCNAB1, CDK1, PDGFRA, RNF213, CALCRL, SH3PXD2B, DLL1, NOTCH2, RASA1, PTK2B, HIF1A, PSKH1, DVL3, LRP5, PPP1R13L, PCNA, RAMP1, MICAL2, RPS6KA2, …	822	945	16130	1.57814	0.00373293	0.00353763
GOTERM_BP	GO:0072358~cardiovascular system development	76	7.83068e-05	-4.1062	PRCP, ROCK2, ETS1, EGR3, ANP32B, GLI2, TGFBI, PLCD1, DVL2, NFE2L2, COL4A1, VEZF1, MAML1, ID1, NOTCH1, MMP2, REST, RGCC, APOE, GNG5, E2F8, ITGAV, XIRP2, SRI, SOX11, MMP14, CERT1, PIK3CB, WASF2, FMNL3, SALL1, SRPX2, RSPO3, SMO, SOX4, BMP7, FOXJ1, LOXL2, ID3, KCNAB1, CDK1, PDGFRA, RNF213, CALCRL, SH3PXD2B, DLL1, NOTCH2, RASA1, PTK2B, HIF1A, PSKH1, DVL3, LRP5, PPP1R13L, PCNA, RAMP1, MICAL2, RPS6KA2, …	822	945	16130	1.57814	0.00373293	0.00353763
GOTERM_BP	GO:1902749~regulation of cell cycle G2/M phase transition	13	7.93804e-05	-4.10029	GTSE1, KIF14, NPM1, CENPF, CDK1, CDK4, CAMK2D, CCND1, RAD51B, FANCI, RCC2, CCNA2, TP53	822	64	16130	3.9859	0.00374011	0.00354443
GOTERM_BP	GO:0044774~mitotic DNA integrity checkpoint	17	9.84155e-05	-4.00694	GTSE1, PCNA, TOP2A, NPM1, EME1, CDK1, CCND1, RPS27L, E2F7, FANCI, AURKA, SOX4, CCNA2, CHEK2, TP53, RGCC, PLK2	822	107	16130	3.11765	0.00458367	0.00434386
GOTERM_BP	GO:0030182~neuron differentiation	93	0.000100688	-3.99702	ACSL4, DISC1, MANF, FGF13, GLI2, SOX3, PAK2, LAMB2, STMN3, CTNNA1, TSPAN2, PBX3, STXBP1, RB1, TRPV4, BAIAP2, NFE2L2, STAT3, ID1, NOTCH1, NCS1, LIMK1, CPNE1, DMRTA2, REST, NAGLU, FEZF2, TRPC5, APOE, TSKU, PHGDH, ASPM, ETV4, B3GNT2, GFAP, CHL1, GDPD5, RND1, SOX11, EIF4E, RAB13, MYCL, WEE1, RASGRF1, SEPTIN2, SALL1, PRKN, SMO, SOX4, BMP7, SALL3, TBX6, PTPRZ1, BCL6, NPTN, BDNF, NGEF, ID3, VIM, NECTIN1…	822	1226	16130	1.48852	0.00463621	0.00439365
GOTERM_BP	GO:0019220~regulation of phosphate metabolic process	116	0.000102126	-3.99086	F2R, UBE2C, MYADM, HYAL2, FGF13, PAK2, CKS1B, CDK4, TRPV4, MRAP2, LDB2, SLC25A23, CXCR4, NOD2, PRMT5, RGCC, ABCA1, APOE, DUSP22, MAPKAPK3, CD81, PPP1R14B, CCND1, PIK3CB, SRPX2, PRKCD, BMP7, CHEK2, PDPK1, RPS3, P2RX7, NPTN, TTK, TWF1, GRM8, MYC, PDGFRA, STK25, BARD1, HIF1A, LRP5, TESC, ADRB1, RAMP1, VANGL2, MIDN, GRM2, CAMK2D, NCK1, CKS2, CIB1, EDNRA, C1QL4, ROCK2, KIF14, PPP2R5A, GRM1, RB1, DVL2,…	822	1610	16130	1.41382	0.00464962	0.00440636
GOTERM_BP	GO:0016310~phosphorylation	152	0.000107123	-3.97012	F2R, UBE2C, MYADM, HYAL2, RHO, FGF13, SMAD5, PAK2, CKS1B, CDK4, TRPV4, CDK15, LDB2, SLC25A23, STK36, CXCR4, NOD2, LIMK1, PRMT5, RGCC, MELK, APOE, DUSP22, MAPKAPK3, PRKD3, PSMB8, ITGAV, CD81, OBSCN, CCND1, WEE1, PIK3CB, RASGRF1, ATP13A2, PRKCD, PIP5K1B, BMP7, CHEK2, PDPK1, RPS3, PSMA2, DGKH, P2RX7, NPTN, IRAK4, RASGRF2, PAK6, DTYMK, TTK, TWF1, MYC, PDGFRA, AURKB, STK17B, STK25, HIF1A, DCLK1, LRP5,…	822	2229	16130	1.33812	0.00477058	0.00452098
GOTERM_BP	GO:1901988~negative regulation of cell cycle phase transition	22	0.000107736	-3.96764	GTSE1, PCNA, NDC80, NPM1, CENPF, TTK, CDK1, RB1, SOX11, CCND1, BUB1, ZFP36L2, RPS27L, E2F7, FANCI, AURKA, SOX4, CCNA2, CHEK2, TP53, RGCC, PLK2	822	166	16130	2.60062	0.00477058	0.00452098
GOTERM_BP	GO:1901991~negative regulation of mitotic cell cycle phase transition	21	0.000108315	-3.96531	GTSE1, PCNA, NDC80, NPM1, CENPF, TTK, CDK1, RB1, CCND1, BUB1, ZFP36L2, RPS27L, E2F7, FANCI, AURKA, SOX4, CCNA2, CHEK2, TP53, RGCC, PLK2	822	154	16130	2.67585	0.00477058	0.00452098
GOTERM_BP	GO:0023014~signal transduction by protein phosphorylation	71	0.00011581	-3.93625	STK10, F2R, HYAL2, FGF13, PAK2, GRM1, DVL2, TRPV4, CXCR4, GLIPR2, GRIN2A, ADAM9, PRMT5, TNFRSF19, TNFRSF11A, NOD2, PKN1, BIRC7, MAP3K21, MAP3K1, APOE, DUSP22, MAPKAPK3, PSMB8, CD81, ITGAV, STK38, DENND2B, PIK3CB, RASGRF1, PRKN, PRKCD, BMP7, WNK2, ATP6AP1, RPS3, PSMA2, PSME1, P2RX7, NPTN, IRAK4, RASGRF2, PAK6, CDK1, MYC, PDGFRA, PSMB9, STK25, SORBS3, ZFP36L2, RASA1, RGS4, PTK2B, ACVR2A, PBK, DVL3,…	822	877	16130	1.58862	0.00504585	0.00478185
GOTERM_BP	GO:0071103~DNA conformation change	31	0.000124752	-3.90395	CENPI, NUSAP1, ANP32B, TOP2A, NPM1, SMC4, CDK1, CHAF1B, HELLS, MIS18A, DDX11, GINS4, ASF1B, TP53, SMC2, CENPH, MCM3, NCAPG, NCAPD2, GINS2, NASP, NCAPD3, KNL1, RAD51, PIF1, CENPK, MCM7, NCAPH, CDC45, MCM5, HMGB2	822	284	16130	2.14193	0.00537761	0.00509625
GOTERM_BP	GO:0060548~negative regulation of cell death	72	0.000135649	-3.86758	F2R, DAD1, MNT, EGR3, KIF14, GLI2, PAK2, CTNNA1, STXBP1, NFE2L2, STAT3, SIX4, HELLS, ID1, NOTCH1, NOD2, BIRC7, APOE, VSTM2L, ITGAV, IVNS1ABP, CHL1, MDK, SOX11, TPT1, SH3GLB1, SLC46A2, CORO1A, RPS6, ATP13A2, PRKN, PRKCD, SMO, SOX4, BMP7, RACK1, HMGB2, PDPK1, BCL6, DDAH2, BDNF, NPM1, UCP2, PELI3, CDK1, MYC, AURKB, NIBAN2, TFAP2A, ANXA5, BARD1, DLL1, NOTCH2, RASA1, PTK2B, HIF1A, RBCK1, AURKA, BIRC5,…	822	897	16130	1.57508	0.00578577	0.00548306
GOTERM_BP	GO:0045786~negative regulation of cell cycle	44	0.000143956	-3.84177	GTSE1, UBE2C, ETS1, CDKN2C, FBXO5, TOP2A, NPM1, NDC80, TTK, EME1, CDK1, MYC, RB1, CDK4, AURKB, BARD1, ZFP36L2, NOTCH2, FANCI, AURKA, KNTC1, CHEK1, TP53, RGCC, PLK2, PCNA, PTPN3, RPS6KA2, NUPR1, E2F8, ESPL1, CENPF, SOX11, CCND1, BUB1, DHCR24, RPL24, RPS27L, RPS6, E2F7, SOX4, CCNA2, BMP7, CHEK2	822	470	16130	1.83703	0.00607616	0.00575826
GOTERM_BP	GO:0034645~cellular macromolecule biosynthetic process	304	0.000145875	-3.83602	F2R, RFC4, EXO1, DAD1, TFR2, RPS13, EGR3, SMAD5, SOX3, COMMD2, NOCT, TFEB, CDK4, PHF19, RPL13A, SLC25A23, STK36, SNAPC1, NOTCH1, MCM8, UHRF1, POLE, PRMT5, RGCC, EIF3H, APOE, DUSP22, TARS1, B3GNT2, MDK, EIF4E, RPSA, VCAN, RPL19, RPS14, RPL21, RPS11, HMGB2, CHEK2, STAT6, RPS3, RPL23A, CPEB1, RPL37, TOP2A, ESCO2, PAK6, ATAD2, MYC, STAT4, AURKB, RPL39, BARD1, SNRPG, RPL30, RPL18, RPS19, BIRC5, GINS4,…	822	5012	16130	1.19021	0.00609367	0.00577485
GOTERM_BP	GO:0006281~DNA repair	48	0.000150491	-3.82249	RPS3, EXO1, RFC4, MMS22L, RNASEH2A, ESCO2, NPM1, POLD2, FANCC, SMC5, EME1, CDK1, CHAF1B, POLD1, PARP9, BARD1, RAD51B, FIGN, FANCI, UHRF1, MCM8, CHEK1, POLE, SSRP1, DDX11, GINS4, NEIL3, TP53, DTL, PCNA, BRCA2, FOXM1, RAD51AP1, GINS2, RAD51, PIF1, EEPD1, POLA1, RPS27L, CIB1, POLE2, PARP4, PRIMPOL, CDC45, MGME1, CHEK2, HMGB2, FANCD2	822	530	16130	1.77717	0.0062034	0.00587884
GOTERM_BP	GO:0050767~regulation of neurogenesis	58	0.000151564	-3.8194	DISC1, FGF13, GLI2, SOX3, CTNNA1, TRPV4, BAIAP2, NFE2L2, STAT3, CXCR4, ID1, NOTCH1, NCS1, LIMK1, PRMT5, CPNE1, DMRTA2, REST, FEZF2, TRPC5, APOE, ASPM, GFAP, GDPD5, SOX11, EIF4E, MYCL, PRKN, SMO, BMP7, HMGB2, TBX6, PTPRZ1, BCL6, NPTN, BDNF, BIN1, NGEF, VIM, CDK1, MYC, CDC20, STK25, DLL1, PTK2B, HIF1A, RIMS1, RTN4R, CHN1, CPNE5, PLK2, THY1, PTK7, ASCL1, NCK1, PRRX1, CIB1, CRABP2	822	682	16130	1.66881	0.0062034	0.00587884
GOTERM_BP	GO:0045005~DNA-dependent DNA replication maintenance of fidelity	9	0.000153705	-3.81331	POLD1, RAD51, PCNA, BRCA2, MMS22L, PRIMPOL, POLE, DDX11, EME1	822	32	16130	5.51893	0.00622811	0.00590226
GOTERM_BP	GO:0044773~mitotic DNA damage checkpoint	16	0.000155338	-3.80872	GTSE1, PCNA, NPM1, EME1, CDK1, CCND1, RPS27L, E2F7, FANCI, AURKA, SOX4, CCNA2, CHEK2, TP53, RGCC, PLK2	822	100	16130	3.13966	0.00623199	0.00590594
GOTERM_BP	GO:0051348~negative regulation of transferase activity	36	0.000158075	-3.80114	PSME1, PSMA2, UBE2C, HYAL2, CDKN2C, FBXO5, NPM1, PPP2R5A, PAK2, CDK1, RB1, PSMB9, CDC20, RGS4, RTN4R, LRP5, TESC, LIMK1, PKN1, TP53, APOE, AJUBA, DUSP22, THY1, PSMB8, MIDN, STK38, NCK1, PIF1, DUSP2, CIB1, PRKN, PRKCD, BMP7, RACK1, PDPK1	822	357	16130	1.97878	0.0062796	0.00595105
GOTERM_BP	GO:0061640~cytoskeleton-dependent cytokinesis	10	0.000176489	-3.75328	KIF23, SNX18, RASA1, NUSAP1, CEP55, KIF20A, RACGAP1, SNX33, KIF4A, AURKB	822	41	16130	4.78607	0.00694305	0.00657979
GOTERM_BP	GO:0000027~ribosomal large subunit assembly	8	0.000185034	-3.73275	RPL12, RPL23A, RPL24, RPL3, RPL6, RPL5, RPL10, RPL11	822	25	16130	6.27932	0.0072092	0.00683202
GOTERM_BP	GO:0034654~nucleobase-containing compound biosynthetic process	268	0.00018869	-3.72425	F2R, RFC4, EXO1, TFR2, RPS13, EGR3, SMAD5, SOX3, COMMD2, NOCT, TFEB, MRAP2, PHF19, RPL13A, STK36, SNAPC1, NOTCH1, UHRF1, POLE, PRMT5, RGCC, APOE, DUSP22, MTAP, MDK, RPSA, RPL19, RPS14, RPL21, RPS11, HMGB2, CHEK2, STAT6, RPS3, RPL23A, RPL37, TOP2A, PAK6, DTYMK, ATAD2, GRM8, MYC, STAT4, AURKB, RPL39, BARD1, SNRPG, RPL30, RPL18, RPS19, BIRC5, HIVEP3, ASF1B, HSPA8, ADRB1, BHLHE40, PFN1, MICAL2, PKN2,…	822	4357	16130	1.20701	0.00728162	0.00690065
GOTERM_BP	GO:0000281~mitotic cytokinesis	9	0.000193924	-3.71237	KIF23, SNX18, RASA1, NUSAP1, CEP55, KIF20A, RACGAP1, SNX33, KIF4A	822	33	16130	5.35169	0.00730992	0.00692747
GOTERM_BP	GO:0002040~sprouting angiogenesis	13	0.000194332	-3.71146	EGR3, E2F8, EPHB4, LOXL2, PGF, RNF213, DLL1, CIB1, E2F7, PTK2B, NOTCH1, SRPX2, RSPO3	822	70	16130	3.64425	0.00730992	0.00692747
GOTERM_BP	GO:0043069~negative regulation of programmed cell death	67	0.000194835	-3.71033	F2R, DAD1, MNT, EGR3, KIF14, GLI2, PAK2, CTNNA1, STXBP1, NFE2L2, STAT3, SIX4, HELLS, ID1, NOTCH1, NOD2, BIRC7, APOE, VSTM2L, ITGAV, IVNS1ABP, CHL1, MDK, TPT1, SH3GLB1, SLC46A2, CORO1A, RPS6, PRKN, PRKCD, SMO, BMP7, HMGB2, PDPK1, BCL6, DDAH2, BDNF, NPM1, UCP2, PELI3, CDK1, MYC, AURKB, NIBAN2, TFAP2A, ANXA5, BARD1, DLL1, NOTCH2, RASA1, PTK2B, HIF1A, RBCK1, AURKA, BIRC5, ASIC2, TP53, PLK2, NACA, FLN…	822	829	16130	1.58593	0.00730992	0.00692747
GOTERM_BP	GO:0002315~marginal zone B cell differentiation	5	0.000206098	-3.68593	MFNG, DLL1, NOTCH2, PTK2B, LFNG	822	7	16130	14.0163	0.00766155	0.0072607
GOTERM_BP	GO:0043066~negative regulation of apoptotic process	66	0.000227038	-3.6439	F2R, DAD1, MNT, EGR3, KIF14, GLI2, PAK2, CTNNA1, STXBP1, NFE2L2, STAT3, SIX4, HELLS, ID1, NOTCH1, NOD2, BIRC7, APOE, VSTM2L, ITGAV, IVNS1ABP, CHL1, MDK, TPT1, SH3GLB1, SLC46A2, CORO1A, RPS6, PRKN, PRKCD, SMO, BMP7, HMGB2, PDPK1, BCL6, DDAH2, BDNF, NPM1, UCP2, PELI3, CDK1, MYC, AURKB, NIBAN2, TFAP2A, ANXA5, BARD1, DLL1, NOTCH2, RASA1, PTK2B, HIF1A, AURKA, BIRC5, ASIC2, TP53, PLK2, NACA, FLNA, ASCL…	822	818	16130	1.58326	0.00836326	0.0079257
GOTERM_BP	GO:0048666~neuron development	75	0.000255373	-3.59283	ACSL4, DISC1, MANF, FGF13, GLI2, SOX3, PAK2, LAMB2, STMN3, CTNNA1, TSPAN2, PBX3, STXBP1, RB1, TRPV4, BAIAP2, NFE2L2, ID1, NOTCH1, LIMK1, CPNE1, NAGLU, FEZF2, TRPC5, APOE, TSKU, PHGDH, ETV4, B3GNT2, GFAP, CHL1, GDPD5, RND1, RAB13, WEE1, RASGRF1, SEPTIN2, PRKN, BMP7, SALL3, TBX6, PTPRZ1, NPTN, BDNF, NGEF, VIM, NECTIN1, CLIC5, OPHN1, CDC20, STK25, OLFM3, PTK2B, RIMS1, RTN4R, DCLK1, AURKA, CHN1, CPNE…	822	965	16130	1.52509	0.00924905	0.00876514
GOTERM_BP	GO:0044819~mitotic G1/S transition checkpoint	13	0.00025565	-3.59235	GTSE1, PCNA, NPM1, CDK1, CCND1, RPS27L, E2F7, AURKA, SOX4, CHEK2, TP53, RGCC, PLK2	822	72	16130	3.54302	0.00924905	0.00876514
GOTERM_BP	GO:0010720~positive regulation of cell development	44	0.000260392	-3.58437	ATP6AP1, BCL6, NPTN, MYADM, BDNF, DISC1, BIN1, GLI2, MYC, BAIAP2, STK25, NFE2L2, UNC13D, PTK2B, HIF1A, RIMS1, CXCR4, GLIPR2, NOTCH1, AURKA, CPNE1, DMRTA2, LIMK1, PRMT5, CPNE5, RGCC, FEZF2, APOE, TRPC5, ASPM, GFAP, PTK7, GDPD5, S1PR2, SOX11, FLNA, NCK1, ASCL1, GPR68, CIB1, PRKN, SMO, BMP7, CRABP2	822	483	16130	1.78759	0.00933723	0.00884871
GOTERM_BP	GO:0051304~chromosome separation	13	0.000292017	-3.53459	UBE2C, TOP2A, NDC80, ESPL1, NCAPD2, CENPF, TTK, NCAPD3, EME1, RB1, BUB1, TACC3, DLGAP5	822	73	16130	3.49448	0.0103794	0.00983635
GOTERM_BP	GO:0001525~angiogenesis	39	0.000307153	-3.51265	PRCP, ROCK2, ETS1, EGR3, TGFBI, PLCD1, LOXL2, PDGFRA, RNF213, CALCRL, NFE2L2, DLL1, COL4A1, VEZF1, PTK2B, HIF1A, ID1, NOTCH1, LRP5, MMP2, RGCC, RAMP1, THY1, E2F8, EPHB4, ITGAV, PGF, MMP14, SPARC, PIK3CB, WASF2, FMNL3, CIB1, E2F7, EDNRA, SRPX2, RSPO3, GNA13, PRKD2	822	413	16130	1.85301	0.0108225	0.0102562
GOTERM_BP	GO:0051052~regulation of DNA metabolic process	36	0.000313892	-3.50322	BCL6, RPS3, RFC4, GLI2, TOP2A, ESCO2, NPM1, ID3, CDK1, MYC, PDGFRA, AURKB, PTK2B, FIGN, MIS18A, UHRF1, CHEK1, DDX11, PRMT5, TP53, RGCC, PCNA, PFN1, BRCA2, E2F8, FOXM1, DSCC1, RAD51AP1, RAD51, PIF1, E2F7, PRKCD, CHEK2, PRKD2, CDT1, STAT6	822	370	16130	1.90925	0.0109646	0.0103909
GOTERM_BP	GO:0043523~regulation of neuron apoptotic process	23	0.000340154	-3.46832	F2R, APOE, VSTM2L, BDNF, KIF14, NPM1, CHL1, MDK, STXBP1, TFAP2A, ASCL1, RASA1, CORO1A, SIX4, PTK2B, HIF1A, PRKN, BCL2L11, BIRC5, HYOU1, GABRB2, TP53, PDPK1	822	193	16130	2.33848	0.0117804	0.011164
GOTERM_BP	GO:0045840~positive regulation of mitotic nuclear division	10	0.000371953	-3.42951	UBE2C, NUSAP1, ESPL1, LRP5, DLGAP5, AURKA, SMC5, BIRC5, RB1, RGCC	822	45	16130	4.36064	0.0127725	0.0121042
GOTERM_BP	GO:0009792~embryo development ending in birth or egg hatching	50	0.000386491	-3.41286	DAD1, ACSL4, GLI2, PLCD1, TFEB, RPS7, DVL2, YBX1, SIX4, NOTCH1, LFNG, BRCA2, PHGDH, E2F8, NASP, SOX11, MMP14, CERT1, RSPO3, SMO, SOX4, BMP7, PLOD3, TBX6, GNA12, GPR161, MYC, PDGFRA, CCNB2, TFAP2A, DLL1, APBA2, RAD51B, HIF1A, ACVR2A, DVL3, BCL2L11, CHEK1, APBA3, GINS4, NKD1, PFN1, VANGL2, CECR2, PTK7, PRRX1, KIAA1217, E2F7, EDNRA, GNA13	822	583	16130	1.68292	0.0131602	0.0124716
GOTERM_BP	GO:0030036~actin cytoskeleton organization	48	0.000392151	-3.40655	BCL6, ROCK2, KIF23, MYADM, SDAD1, CNN3, ACTR3B, CTNNA1, CNN2, TWF1, PDGFRA, TRPV4, BAIAP2, OPHN1, SORBS3, SIX4, RASA1, PTK2B, ID1, RACGAP1, LIMK1, FMNL1, RGCC, LIMA1, PFN1, MICAL2, XIRP2, PTK7, S1PR2, RND1, OBSCN, FLNA, NCK1, ARFIP1, RAB13, ALDOA, IQGAP2, WASF2, TPM3, FMNL3, CORO1A, GPR65, PRKN, PRKCD, TRIP10, FOXJ1, PDPK1, INPPL1	822	553	16130	1.70325	0.0132416	0.0125488
GOTERM_BP	GO:0001667~ameboidal-type cell migration	32	0.0004508	-3.34602	PRCP, ROCK2, ETS1, HYAL2, EGR3, LOXL2, NFE2L2, ATOH8, PTK2B, HIF1A, ID1, GLIPR2, NOTCH1, LRP5, ADAM9, PKN1, RGCC, APOE, PFN1, PKN2, EPHB4, HAS1, SPARC, RAB13, SGPL1, WASF2, CIB1, SLC8A1, SRPX2, SMO, PRKD2, PDPK1	822	320	16130	1.96229	0.0150962	0.0143064
GOTERM_BP	GO:0072395~signal transduction involved in cell cycle checkpoint	12	0.000457881	-3.33925	GTSE1, PCNA, E2F7, NPM1, AURKA, SOX4, CDK1, CHEK2, TP53, RGCC, SOX11, PLK2	822	66	16130	3.56779	0.0152076	0.014412
GOTERM_BP	GO:0048534~hematopoietic or lymphoid organ development	62	0.000491184	-3.30876	MFNG, ETS1, HYAL2, EGR3, GLI2, SMAD5, CBFB, TSPAN2, RB1, NFE2L2, SIX4, NOTCH1, TNFRSF11A, PKN1, REST, LFNG, MELK, CAMK4, P4HTM, KCNAB2, BRCA2, MMP14, SLC46A2, RBM47, WASF2, RPS6, SNX10, SOX4, RPS14, HMGB2, FANCD2, PTPRZ1, FOXJ1, STAT6, ATP6AP1, BCL6, DNASE2, TOP2A, ESCO2, CCR9, CNN2, MYC, CCNB2, VCAM1, DLL1, ZFP36L2, NOTCH2, PTK2B, HIF1A, ACVR2A, BCL2L11, LRP5, RPS19, TESC, TMEM178A, AP3B1, TSHR,…	822	778	16130	1.56378	0.0161811	0.0153345
GOTERM_BP	GO:0000165~MAPK cascade	66	0.000502848	-3.29856	F2R, HYAL2, FGF13, GRM1, DVL2, TRPV4, CXCR4, GLIPR2, GRIN2A, ADAM9, PRMT5, TNFRSF19, TNFRSF11A, NOD2, PKN1, BIRC7, MAP3K21, MAP3K1, APOE, DUSP22, MAPKAPK3, PSMB8, CD81, ITGAV, STK38, DENND2B, PIK3CB, RASGRF1, PRKN, PRKCD, BMP7, WNK2, ATP6AP1, RPS3, PSMA2, PSME1, P2RX7, NPTN, IRAK4, RASGRF2, CDK1, MYC, PDGFRA, PSMB9, STK25, SORBS3, ZFP36L2, RASA1, RGS4, PTK2B, PBK, DVL3, DIRAS1, AJUBA, VANGL2, FOX…	822	841	16130	1.53996	0.0163906	0.015533
GOTERM_BP	GO:0006564~L-serine biosynthetic process	4	0.000505632	-3.29617	PHGDH, PSAT1, SHMT2, PSPH	822	4	16130	19.6229	0.0163906	0.015533
GOTERM_BP	GO:0022618~ribonucleoprotein complex assembly	24	0.000513009	-3.28987	RPL23A, NPM1, RPS5, EIF3E, NOCT, RPSA, RPL12, RPS28, RPL13A, RPL24, RPL3, SNRPG, RPS27L, RPL6, RPS10, RPL5, RPS19, RPS14, RPS17, PRMT5, RPL10, EIF3F, RPL11, EIF3H	822	212	16130	2.22146	0.0164977	0.0156346
GOTERM_BP	GO:0001822~kidney development	28	0.000532105	-3.274	HYAL2, ODC1, GLI2, SMAD5, ID3, LAMB2, MYC, NID1, PDGFRA, TFAP2A, ADAMTS16, DLL1, DLG5, SIX4, GCNT4, NOTCH1, BCL2L11, VANGL2, CENPF, PYGO1, PGF, SOX11, SGPL1, SALL1, SMO, SOX4, BMP7, FOXJ1	822	267	16130	2.05783	0.0169771	0.0160888
GOTERM_BP	GO:0051347~positive regulation of transferase activity	53	0.00057285	-3.24196	RFC4, F2R, UBE2C, FGF13, KIF14, PAK2, GRM1, CKS1B, DVL2, CXCR4, ADAM9, TNFRSF11A, NOD2, PKN1, RGCC, BIRC7, MAP3K21, MAP3K1, MAPKAPK3, PSMB8, CD81, DSCC1, SH3GLB1, CCND1, RALB, SERINC5, PIK3CB, TPX2, PRKCD, PDPK1, RPS3, PSMA2, PSME1, P2RX7, FBXO5, CDK1, MYC, PDGFRA, AURKB, PSMB9, CDC20, PTK2B, RPS2, DVL3, DIRAS1, RPLP1, AJUBA, VANGL2, S1PR2, GADD45G, FRS2, CKS2, CIB1	822	640	16130	1.62502	0.0181343	0.0171855
GOTERM_BP	GO:0072001~renal system development	29	0.000598759	-3.22275	HYAL2, ODC1, GLI2, SMAD5, ID3, LAMB2, MYC, NID1, PDGFRA, TFAP2A, ADAMTS16, DLL1, COL4A1, DLG5, SIX4, GCNT4, NOTCH1, BCL2L11, VANGL2, CENPF, PYGO1, PGF, SOX11, SGPL1, SALL1, SMO, SOX4, BMP7, FOXJ1	822	283	16130	2.01082	0.0188075	0.0178235
GOTERM_BP	GO:0010631~epithelial cell migration	25	0.000607268	-3.21662	PRCP, ROCK2, ETS1, EGR3, LOXL2, NFE2L2, ATOH8, PTK2B, HIF1A, ID1, GLIPR2, NOTCH1, ADAM9, PKN1, RGCC, APOE, PFN1, PKN2, EPHB4, SPARC, RAB13, CIB1, SRPX2, PRKD2, PDPK1	822	228	16130	2.15163	0.0189281	0.0179378
GOTERM_BP	GO:0008608~attachment of spindle microtubules to kinetochore	7	0.000630871	-3.20006	MIS12, NDC80, RCC2, KNL1, SGO1, RB1, AURKB	822	22	16130	6.24364	0.0195137	0.0184927
GOTERM_BP	GO:0043524~negative regulation of neuron apoptotic process	18	0.000645339	-3.19021	F2R, APOE, VSTM2L, BDNF, KIF14, CHL1, MDK, STXBP1, RASA1, CORO1A, SIX4, PTK2B, HIF1A, PRKN, BIRC5, HYOU1, GABRB2, PDPK1	822	138	16130	2.5595	0.0197091	0.0186779
GOTERM_BP	GO:1901215~negative regulation of neuron death	21	0.000646918	-3.18915	F2R, APOE, VSTM2L, BDNF, KIF14, CHL1, MDK, STXBP1, STAT3, RASA1, CORO1A, SIX4, PTK2B, HIF1A, ATP13A2, PRKN, BIRC5, HYOU1, RACK1, GABRB2, PDPK1	822	176	16130	2.34137	0.0197091	0.0186779
GOTERM_BP	GO:0051782~negative regulation of cell division	6	0.000660715	-3.17999	E2F8, E2F7, ASPM, TXNIP, MYC, AURKB	822	15	16130	7.84915	0.019845	0.0188067
GOTERM_BP	GO:1901214~regulation of neuron death	27	0.000661174	-3.17968	F2R, BDNF, KIF14, NPM1, STXBP1, TFAP2A, STAT3, SIX4, RASA1, PTK2B, HIF1A, BCL2L11, BIRC5, TP53, APOE, VSTM2L, CHL1, MDK, ASCL1, DHCR24, CORO1A, ATP13A2, PRKN, HYOU1, RACK1, GABRB2, PDPK1	822	257	16130	2.06155	0.019845	0.0188067
GOTERM_BP	GO:0032070~regulation of deoxyribonuclease activity	5	0.000683377	-3.16534	RPS3, PCNA, NPM1, PRKCD, DDX11	822	9	16130	10.9016	0.0203606	0.0192954
GOTERM_BP	GO:0051345~positive regulation of hydrolase activity	70	0.000696846	-3.15686	F2R, RSU1, ANP32B, SEC61B, ARHGAP31, ARHGEF9, DVL2, ARHGAP11A, STAT3, UHRF1, GRIN2A, ATP1B1, DDX11, SGSM2, REST, RIN2, MYO9B, TAX1BP3, OBSCN, MMP14, DENND2B, GPR65, RASGRF1, PRKCD, STXBP5, TRIP10, RACK1, HMGB2, RGL1, ARHGAP17, FOXJ1, PDPK1, RPS3, PSME1, SNX18, RASGRF2, RCC1, RIN1, NGEF, GM2A, MYC, PDGFRA, OPHN1, SRGAP1, RASA1, RGS4, PTK2B, RTN4R, DVL3, BCL2L11, RACGAP1, CHN1, ADRB1, PCNA, PFN1, T…	822	917	16130	1.49793	0.0206104	0.019532
GOTERM_BP	GO:0043583~ear development	23	0.000729087	-3.13722	TSHR, VANGL2, ANP32B, GLI2, CECR2, PTK7, GSDME, DVL2, TFAP2A, CLIC5, SPARC, MYCL, PRRX1, DLL1, SIX4, LRTOMT, SALL1, DVL3, NOTCH1, BCL2L11, CCNA2, GABRB2, NAGLU	822	204	16130	2.21238	0.0212537	0.0201417
GOTERM_BP	GO:0051402~neuron apoptotic process	23	0.000729087	-3.13722	F2R, APOE, VSTM2L, BDNF, KIF14, CHL1, MDK, RB1, STXBP1, TFAP2A, ASCL1, RASA1, CORO1A, SIX4, PTK2B, HIF1A, PRKN, BCL2L11, BIRC5, HYOU1, GABRB2, TP53, PDPK1	822	204	16130	2.21238	0.0212537	0.0201417
GOTERM_BP	GO:0048839~inner ear development	21	0.000746926	-3.12672	TSHR, VANGL2, ANP32B, GLI2, CECR2, PTK7, GSDME, DVL2, TFAP2A, CLIC5, SPARC, MYCL, PRRX1, DLL1, SIX4, LRTOMT, DVL3, NOTCH1, CCNA2, GABRB2, NAGLU	822	178	16130	2.31506	0.0216182	0.0204871
GOTERM_BP	GO:0043065~positive regulation of apoptotic process	48	0.000817907	-3.0873	BCL6, RPS3, P2RX7, F2R, HYAL2, RASGRF2, ANP32B, BIN1, TOP2A, PAK2, ID3, NGEF, CTNNA1, ARHGEF9, MYC, CDK4, TFAP2A, STK17B, BARD1, SRPX, RBCK1, NOTCH1, BCL2L11, GRIN2A, REST, TP53, RGCC, MELK, SERINC3, RPS6KA2, NUPR1, TXNIP, GSDME, SH3GLB1, OBSCN, GADD45G, ANO6, NCK1, ASCL1, CAMK2D, RPS27L, RPS6, PRKN, PRKCD, SOX4, BMP7, RACK1, CHEK2	822	572	16130	1.64667	0.0235047	0.0222749
GOTERM_BP	GO:0045665~negative regulation of neuron differentiation	22	0.000849293	-3.07094	FEZF2, TRPC5, APOE, FGF13, THY1, ASPM, SOX3, GFAP, NGEF, VIM, TRPV4, EIF4E, ASCL1, DLL1, CIB1, ID1, RTN4R, NOTCH1, BMP7, REST, TBX6, PLK2	822	193	16130	2.2368	0.0242348	0.0229668
GOTERM_BP	GO:0048732~gland development	38	0.000865771	-3.0626	ETS1, WLS, TYMS, GLI2, SOX3, UCP2, MYC, CCNB2, SIX4, HIF1A, RPS16, NOTCH1, LRP5, BCL2L11, AURKA, ORAI1, TNFRSF11A, PRMT5, HRH2, PCNA, PTPN3, DNAAF1, BRCA2, E2F8, ETV4, RPS24, MDK, SLC46A2, CCND1, ASCL1, FRS2, E2F7, SALL1, RPL19, SMO, RPLP0, BMP7, STAT6	822	421	16130	1.77119	0.0245322	0.0232487
GOTERM_BP	GO:0035239~tube morphogenesis	33	0.000898556	-3.04645	GLI2, RPS7, DVL2, MYC, PDGFRA, ADAMTS16, DLL1, ATOH8, COL4A1, DLG5, SIX4, HIF1A, DVL3, NOTCH1, LRP5, BCL2L11, PFN1, DNAAF1, MICAL2, VANGL2, CECR2, ETV4, PTK7, PGF, SOX11, MMP14, SALL1, EDNRA, SMO, SOX4, GNA13, BMP7, PRKD2	822	348	16130	1.86079	0.0252844	0.0239615
GOTERM_BP	GO:0045664~regulation of neuron differentiation	47	0.000908076	-3.04188	BCL6, NPTN, BDNF, FGF13, DISC1, BIN1, GLI2, SOX3, NGEF, VIM, TRPV4, BAIAP2, CDC20, STK25, NFE2L2, DLL1, PTK2B, RIMS1, ID1, RTN4R, NOTCH1, NCS1, CPNE1, LIMK1, REST, CHN1, CPNE5, PLK2, FEZF2, APOE, TRPC5, THY1, ASPM, GFAP, PTK7, GDPD5, SOX11, EIF4E, NCK1, ASCL1, MYCL, PRRX1, CIB1, PRKN, BMP7, CRABP2, TBX6	822	560	16130	1.64692	0.025376	0.0240483
GOTERM_BP	GO:0010942~positive regulation of cell death	50	0.00093781	-3.02789	F2R, HYAL2, ANP32B, PAK2, CTNNA1, ARHGEF9, CDK4, SRPX, NOTCH1, GRIN2A, REST, RGCC, MELK, APOE, SERINC3, NUPR1, TXNIP, SH3GLB1, OBSCN, RPS6, PRKN, PRKCD, SOX4, BMP7, RACK1, CHEK2, RPS3, BCL6, P2RX7, RASGRF2, BIN1, TOP2A, UCP2, NGEF, ID3, MYC, TFAP2A, STK17B, BARD1, RBCK1, BCL2L11, TP53, RPS6KA2, GSDME, GADD45G, ANO6, ASCL1, CAMK2D, NCK1, RPS27L	822	607	16130	1.61638	0.0259866	0.024627
GOTERM_BP	GO:0001655~urogenital system development	31	0.000942751	-3.0256	HYAL2, ODC1, GLI2, SMAD5, ID3, LAMB2, MYC, NID1, PDGFRA, TFAP2A, ADAMTS16, DLL1, COL4A1, DLG5, SIX4, GCNT4, HELLS, NOTCH1, BCL2L11, VANGL2, CENPF, PYGO1, PGF, SOX11, FRS2, SGPL1, SALL1, SMO, SOX4, BMP7, FOXJ1	822	320	16130	1.90097	0.0259866	0.024627
GOTERM_BP	GO:0045995~regulation of embryonic development	16	0.000949668	-3.02243	NKD1, MYADM, VANGL2, PTK7, CDK1, NOCT, DVL2, NFE2L2, DLL1, SIX4, DVL3, NOTCH1, BMP7, RACK1, LFNG, GPR161	822	118	16130	2.66073	0.0260004	0.02464
GOTERM_BP	GO:0043068~positive regulation of programmed cell death	48	0.000982257	-3.00777	BCL6, RPS3, P2RX7, F2R, HYAL2, RASGRF2, ANP32B, BIN1, TOP2A, PAK2, ID3, NGEF, CTNNA1, ARHGEF9, MYC, CDK4, TFAP2A, STK17B, BARD1, SRPX, RBCK1, NOTCH1, BCL2L11, GRIN2A, REST, TP53, RGCC, MELK, SERINC3, RPS6KA2, NUPR1, TXNIP, GSDME, SH3GLB1, OBSCN, GADD45G, ANO6, NCK1, ASCL1, CAMK2D, RPS27L, RPS6, PRKN, PRKCD, SOX4, BMP7, RACK1, CHEK2	822	577	16130	1.63241	0.0265524	0.0251632
GOTERM_BP	GO:0090596~sensory organ morphogenesis	26	0.000987252	-3.00557	GLI2, NECTIN1, DVL2, CLIC5, TFAP2A, OLFM3, DLL1, STAT3, SIX4, HIF1A, MEGF11, DVL3, LRP5, NAGLU, FBN2, NKD1, TSKU, TSHR, VANGL2, THY1, PTK7, SOX11, FRS2, PRRX1, SALL1, BMP7	822	250	16130	2.04078	0.0265524	0.0251632
GOTERM_BP	GO:0051961~negative regulation of nervous system development	27	0.00098949	-3.00459	FGF13, SOX3, NGEF, VIM, CTNNA1, TRPV4, DLL1, STAT3, ID1, RTN4R, NOTCH1, REST, PLK2, FEZF2, APOE, TRPC5, THY1, ASPM, RFX4, GFAP, SOX11, EIF4E, ASCL1, CIB1, BMP7, TBX6, GPR161	822	264	16130	2.00688	0.0265524	0.0251632
GOTERM_BP	GO:0045981~positive regulation of nucleotide metabolic process	17	0.0010097	-2.99581	P2RX7, VIPR2, ADRB1, APOE, RAMP1, TSHR, MYC, MRAP2, CALCRL, STAT3, GPR65, HIF1A, EDNRA, RACK1, MC4R, GPR161, ABCA1	822	131	16130	2.54648	0.0267657	0.0253654
GOTERM_BP	GO:2000145~regulation of cell motility	58	0.00101065	-2.9954	STK10, PRCP, GTSE1, ROCK2, F2R, MPP1, MYADM, ETS1, HYAL2, KIF14, CTNNA1, TRPV4, LDB2, NFE2L2, STAT3, CXCR4, GLIPR2, NOTCH1, ADAM9, PKN1, RGCC, APOE, CD81, ITGAV, HAS1, MMP14, CORO1A, SRPX2, RACK1, GNA12, PDPK1, CNN2, MYC, PDGFRA, SRGAP1, SINHCAF, ATOH8, PTK2B, HIF1A, NKD1, AJUBA, PFN1, PKN2, THY1, CMKLR1, ARHGEF39, PGF, ANO6, FLNA, SPARC, CAMK2D, NCK1, CIB1, SLC8A1, RCC2, MAPRE1, GNA13, PRKD2	822	736	16130	1.54637	0.0267657	0.0253654
GOTERM_BP	GO:0031175~neuron projection development	63	0.0010229	-2.99017	ACSL4, DISC1, MANF, FGF13, GLI2, PAK2, LAMB2, STMN3, CTNNA1, TSPAN2, STXBP1, RB1, TRPV4, BAIAP2, NFE2L2, ID1, NOTCH1, LIMK1, CPNE1, FEZF2, TRPC5, APOE, TSKU, PHGDH, ETV4, B3GNT2, GFAP, CHL1, GDPD5, RAB13, WEE1, RASGRF1, SEPTIN2, PRKN, BMP7, TBX6, PTPRZ1, NPTN, BDNF, NGEF, VIM, NECTIN1, OPHN1, CDC20, STK25, PTK2B, RIMS1, RTN4R, DCLK1, AURKA, CHN1, CPNE5, PLK2, VANGL2, THY1, PTK7, NCK1, PRRX1, BOC,…	822	817	16130	1.51315	0.0269142	0.0255061
GOTERM_BP	GO:0006977~DNA damage response, signal transduction by p53 class mediator resulting in cell cycle arrest	11	0.00107029	-2.9705	GTSE1, PCNA, E2F7, NPM1, AURKA, SOX4, CDK1, CHEK2, TP53, RGCC, PLK2	822	62	16130	3.48148	0.0279795	0.0265156
GOTERM_BP	GO:0060562~epithelial tube morphogenesis	30	0.00111792	-2.95159	GLI2, RPS7, DVL2, MYC, ADAMTS16, DLL1, COL4A1, DLG5, SIX4, HIF1A, DVL3, NOTCH1, LRP5, PFN1, DNAAF1, MICAL2, VANGL2, CECR2, ETV4, PTK7, PGF, SOX11, MMP14, SALL1, EDNRA, SMO, SOX4, GNA13, BMP7, PRKD2	822	309	16130	1.90513	0.0290372	0.027518
GOTERM_BP	GO:0002520~immune system development	63	0.00114175	-2.94243	EXO1, MFNG, ETS1, HYAL2, EGR3, GLI2, SMAD5, CBFB, TSPAN2, RB1, NFE2L2, SIX4, NOTCH1, TNFRSF11A, PKN1, REST, LFNG, MELK, CAMK4, P4HTM, KCNAB2, BRCA2, MMP14, SLC46A2, RBM47, WASF2, RPS6, SNX10, SOX4, RPS14, HMGB2, FANCD2, PTPRZ1, FOXJ1, STAT6, ATP6AP1, BCL6, DNASE2, TOP2A, ESCO2, CCR9, CNN2, MYC, CCNB2, VCAM1, DLL1, ZFP36L2, NOTCH2, PTK2B, HIF1A, ACVR2A, BCL2L11, LRP5, RPS19, TESC, TMEM178A, AP3B1,…	822	821	16130	1.50577	0.0293414	0.0278062
GOTERM_BP	GO:0071156~regulation of cell cycle arrest	15	0.00114411	-2.94153	GTSE1, PCNA, FOXM1, BIN1, NPM1, CDK1, CDK4, CCND1, E2F7, AURKA, SOX4, CHEK2, TP53, RGCC, PLK2	822	108	16130	2.7254	0.0293414	0.0278062
GOTERM_BP	GO:0007417~central nervous system development	68	0.00119107	-2.92406	ETS1, WLS, DISC1, FGF13, ANP32B, KIF14, GLI2, SOX3, LAMB2, TSPAN2, PBX3, TACC3, STAT3, COL4A1, GART, DLG5, STK36, CXCR4, ID1, NOTCH1, PRMT5, DMRTA2, NAGLU, FEZF2, TSKU, BRCA2, PHGDH, ASPM, RFX4, GFAP, CENPF, GDPD5, MDK, KCNA1, SOX11, VCAN, MFSD2A, SALL1, PRKN, SERPINI1, SMO, SOX4, BMP7, SALL3, FANCD2, PTPRZ1, FOXJ1, HTR5A, CDKN2C, SLC17A7, BIN1, ID3, VIM, EFHC1, KCNAB1, MYC, TFAP2A, DLL1, HIF1A, …	822	904	16130	1.47606	0.0302313	0.0286496
GOTERM_BP	GO:0072413~signal transduction involved in mitotic cell cycle checkpoint	11	0.00121533	-2.91531	GTSE1, PCNA, E2F7, NPM1, AURKA, SOX4, CDK1, CHEK2, TP53, RGCC, PLK2	822	63	16130	3.42622	0.0302313	0.0286496
GOTERM_BP	GO:0072431~signal transduction involved in mitotic G1 DNA damage checkpoint	11	0.00121533	-2.91531	GTSE1, PCNA, E2F7, NPM1, AURKA, SOX4, CDK1, CHEK2, TP53, RGCC, PLK2	822	63	16130	3.42622	0.0302313	0.0286496
GOTERM_BP	GO:0010032~meiotic chromosome condensation	4	0.00121612	-2.91502	SMC2, NCAPD2, SMC4, NCAPD3	822	5	16130	15.6983	0.0302313	0.0286496
GOTERM_BP	GO:0032077~positive regulation of deoxyribonuclease activity	4	0.00121612	-2.91502	RPS3, PCNA, PRKCD, DDX11	822	5	16130	15.6983	0.0302313	0.0286496
GOTERM_BP	GO:0051056~regulation of small GTPase mediated signal transduction	29	0.00139477	-2.8555	BCL6, F2R, RASGRF2, KIF14, NGEF, ARHGAP31, STMN3, ARHGEF9, ARHGAP11A, OPHN1, SRGAP1, NOTCH2, RASA1, RHOV, RACGAP1, CHN1, ABCA1, APOE, FOXM1, MYO9B, ARHGEF39, OBSCN, CAMK2D, ARHGAP42, GPR65, RASGRF1, TRIP10, ARHGAP19, ARHGAP17	822	299	16130	1.90322	0.0344611	0.0326581
GOTERM_BP	GO:0000077~DNA damage checkpoint	18	0.00141987	-2.84775	GTSE1, PCNA, NPM1, EME1, CDK1, CCND1, RPS27L, E2F7, FANCI, AURKA, CHEK1, SOX4, CCNA2, CHEK2, TP53, RGCC, DTL, PLK2	822	148	16130	2.38657	0.0348685	0.0330442
GOTERM_BP	GO:0010647~positive regulation of cell communication	106	0.00148212	-2.82912	F2R, MFNG, HYAL2, DISC1, TFR2, PAK2, TRPV4, SRPX, STK36, CXCR4, NOTCH1, NOD2, PRMT5, CPNE1, DUSP22, MAPKAPK3, PSMB8, GFAP, CD81, PIK3CB, RASGRF1, SALL1, PRKCD, BMP7, RPS3, PSMA2, P2RX7, NPTN, BDNF, IRAK4, TTK, PDGFRA, STK25, HIF1A, BCL2L11, SH3BP2, PLK2, ADRB1, VANGL2, GSDME, VSNL1, CAMK2D, NCK1, ASCL1, PRRX1, CIB1, SHANK2, WLS, GRM1, CTNNA1, DVL2, STAT3, GLIPR2, GRIN2A, ADAM9, TNFRSF11A, TNFRSF1…	822	1555	16130	1.33764	0.0361781	0.0342853
GOTERM_BP	GO:0007264~small GTPase mediated signal transduction	44	0.00150679	-2.82195	BCL6, ROCK2, F2R, RASGRF2, KIF14, NGEF, ARHGAP31, STMN3, ARHGEF9, RB1, NOTCH2, RASA1, RASL12, RHOV, LIMK1, DIRAS1, TP53, PLK2, ABCA1, RFXANK, APOE, RIN2, MAPKAPK3, VANGL2, FOXM1, MYO9B, TAX1BP3, ARHGEF39, RND1, RAB20, GRAP, OBSCN, CAMK2D, RAB13, DHCR24, ARHGAP42, RALB, WASF2, GPR65, RASGRF1, GNA13, CCNA2, RGL1, GNA12	822	527	16130	1.63834	0.0363677	0.0344649
GOTERM_BP	GO:2000179~positive regulation of neural precursor cell proliferation	9	0.00150877	-2.82138	ASCL1, DISC1, GNG5, HIF1A, GLI2, ASPM, NOTCH1, SMO, DMRTA2	822	44	16130	4.01377	0.0363677	0.0344649
GOTERM_BP	GO:0051054~positive regulation of DNA metabolic process	22	0.00151681	-2.81907	RPS3, RFC4, PCNA, PFN1, E2F8, FOXM1, GLI2, TOP2A, NPM1, DSCC1, CDK1, MYC, PDGFRA, AURKB, RAD51, E2F7, PTK2B, PRKCD, DDX11, PRKD2, RGCC, STAT6	822	202	16130	2.13714	0.0363677	0.0344649
GOTERM_BP	GO:0072401~signal transduction involved in DNA integrity checkpoint	11	0.00155352	-2.80868	GTSE1, PCNA, E2F7, NPM1, AURKA, SOX4, CDK1, CHEK2, TP53, RGCC, PLK2	822	65	16130	3.32079	0.036598	0.0346832
GOTERM_BP	GO:1901989~positive regulation of cell cycle phase transition	11	0.00155352	-2.80868	CCND1, UBE2C, RAD51B, ESPL1, NPM1, RCC2, DLGAP5, BIRC5, CDC45, RB1, CDK4	822	65	16130	3.32079	0.036598	0.0346832
GOTERM_BP	GO:0072422~signal transduction involved in DNA damage checkpoint	11	0.00155352	-2.80868	GTSE1, PCNA, E2F7, NPM1, AURKA, SOX4, CDK1, CHEK2, TP53, RGCC, PLK2	822	65	16130	3.32079	0.036598	0.0346832
GOTERM_BP	GO:1903046~meiotic cell cycle process	21	0.00156933	-2.80429	SMC2, BRCA2, RPS6KA2, FBXO5, ASPM, TOP2A, ESPL1, NCAPD2, SMC4, TTK, NCAPD3, EME1, RAD51, CKS2, RAD51B, BCL2L11, AURKA, MKI67, SGO1, FANCD2, LFNG	822	189	16130	2.18032	0.0367568	0.0348337
GOTERM_BP	GO:0050768~negative regulation of neurogenesis	25	0.00163325	-2.78695	FGF13, SOX3, NGEF, VIM, CTNNA1, TRPV4, DLL1, STAT3, ID1, RTN4R, NOTCH1, REST, PLK2, FEZF2, APOE, TRPC5, THY1, ASPM, GFAP, SOX11, EIF4E, ASCL1, CIB1, BMP7, TBX6	822	245	16130	2.00233	0.0380121	0.0360233
GOTERM_BP	GO:0001568~blood vessel development	47	0.00164928	-2.78271	PRCP, ROCK2, ETS1, EGR3, TGFBI, PLCD1, LOXL2, PDGFRA, RNF213, CALCRL, NFE2L2, DLL1, COL4A1, VEZF1, RASA1, PTK2B, HIF1A, ID1, NOTCH1, LRP5, MMP2, RGCC, APOE, RAMP1, THY1, E2F8, EPHB4, ITGAV, PTK7, PGF, MMP14, SPARC, PRRX1, SGPL1, PIK3CB, WASF2, FMNL3, CIB1, E2F7, EDNRA, SRPX2, RSPO3, SMO, SOX4, GNA13, BMP7, PRKD2	822	576	16130	1.60117	0.0380121	0.0360233
GOTERM_BP	GO:1902807~negative regulation of cell cycle G1/S phase transition	14	0.00165107	-2.78224	GTSE1, PCNA, NPM1, CDK1, RB1, CCND1, RPS27L, E2F7, AURKA, SOX4, CHEK2, TP53, RGCC, PLK2	822	100	16130	2.7472	0.0380121	0.0360233
GOTERM_BP	GO:0051493~regulation of cytoskeleton organization	37	0.00170921	-2.7672	RPS3, ROCK2, P2RX7, MYADM, FGF13, ACTR3B, NPM1, SKA3, STMN3, TWF1, PDGFRA, TRPV4, BAIAP2, SORBS3, RASA1, PTK2B, ID1, AURKA, CHEK1, LIMK1, RGCC, PLK2, LIMA1, PFN1, VANGL2, NCK1, ARFIP1, IQGAP2, WASF2, KIF11, CORO1A, CIB1, GPR65, PRKN, PRKCD, MAPRE1, RASSF7	822	422	16130	1.72049	0.0391283	0.0370811
GOTERM_BP	GO:0009967~positive regulation of signal transduction	98	0.00182849	-2.73791	F2R, MFNG, HYAL2, DISC1, PAK2, TRPV4, SRPX, STK36, CXCR4, NOTCH1, NOD2, PRMT5, CPNE1, DUSP22, MAPKAPK3, PSMB8, CD81, PIK3CB, RASGRF1, SALL1, PRKCD, BMP7, RPS3, PSMA2, P2RX7, NPTN, BDNF, IRAK4, TTK, PDGFRA, STK25, HIF1A, BCL2L11, SH3BP2, PLK2, ADRB1, VANGL2, GSDME, CAMK2D, NCK1, ASCL1, PRRX1, CIB1, WLS, GRM1, CTNNA1, DVL2, STAT3, GLIPR2, ADAM9, TNFRSF11A, TNFRSF19, PKN1, BIRC7, LFNG, MAP3K21, MAP3…	822	1428	16130	1.34667	0.0416239	0.0394461
GOTERM_BP	GO:0030097~hemopoiesis	57	0.00185483	-2.7317	MFNG, ETS1, HYAL2, EGR3, GLI2, SMAD5, CBFB, TSPAN2, RB1, NFE2L2, NOTCH1, TNFRSF11A, REST, LFNG, MELK, CAMK4, P4HTM, KCNAB2, BRCA2, MMP14, SLC46A2, RBM47, WASF2, RPS6, SNX10, SOX4, RPS14, HMGB2, FANCD2, PTPRZ1, FOXJ1, STAT6, ATP6AP1, BCL6, DNASE2, TOP2A, ESCO2, CCR9, CNN2, MYC, VCAM1, DLL1, ZFP36L2, NOTCH2, PTK2B, HIF1A, ACVR2A, RPS19, TESC, TMEM178A, AP3B1, TSHR, PYGO1, SGPL1, RPL22, GPR68, CIB1	822	739	16130	1.51354	0.0419875	0.0397907
GOTERM_BP	GO:0051785~positive regulation of nuclear division	10	0.00192955	-2.71454	UBE2C, NUSAP1, ESPL1, LRP5, DLGAP5, AURKA, SMC5, BIRC5, RB1, RGCC	822	56	16130	3.50408	0.0431964	0.0409364
GOTERM_BP	GO:0033047~regulation of mitotic sister chromatid segregation	10	0.00192955	-2.71454	BUB1, TACC3, UBE2C, NDC80, ESPL1, DLGAP5, CENPF, SMC5, TTK, RB1	822	56	16130	3.50408	0.0431964	0.0409364
GOTERM_BP	GO:0033045~regulation of sister chromatid segregation	11	0.00196427	-2.7068	BUB1, TACC3, UBE2C, NDC80, ESPL1, DLGAP5, CENPF, SMC5, TTK, DDX11, RB1	822	67	16130	3.22167	0.0435321	0.0412545
GOTERM_BP	GO:0007009~plasma membrane organization	27	0.00196603	-2.70641	ROCK2, P2RX7, MYADM, FGF13, VAMP3, PPP2R5A, SNX33, STXBP1, BAIAP2, CXCR4, ATP1B1, TESC, ZDHHC23, DYSF, RAMP1, GOLGA7B, SH3GLB1, ANO6, FLNA, RAB13, CIB1, PRKCD, KCNB2, RACK1, CACNB2, CACNB3, PDPK1	822	277	16130	1.9127	0.0435321	0.0412545
GOTERM_BP	GO:0072331~signal transduction by p53 class mediator	19	0.00200911	-2.697	GTSE1, PCNA, BRCA2, NUPR1, FOXM1, NPM1, ZNF385D, PDK2, CDK1, SH3GLB1, RPS27L, E2F7, PRKN, AURKA, SOX4, CHEK2, TP53, RGCC, PLK2	822	166	16130	2.24599	0.0441016	0.0417943
GOTERM_BP	GO:1902692~regulation of neuroblast proliferation	7	0.00201353	-2.69604	DISC1, HIF1A, ASPM, NOTCH1, SMO, CTNNA1, DMRTA2	822	27	16130	5.08741	0.0441016	0.0417943
GOTERM_BP	GO:0043408~regulation of MAPK cascade	53	0.00203482	-2.69147	F2R, HYAL2, GRM1, DVL2, TRPV4, CXCR4, ID1, GLIPR2, ADAM9, PRMT5, TNFRSF19, TNFRSF11A, NOD2, PKN1, BIRC7, MAP3K21, MAP3K1, APOE, DUSP22, MAPKAPK3, CD81, STK38, DENND2B, PIK3CB, PRKN, PRKCD, BMP7, WNK2, ATP6AP1, RPS3, P2RX7, NPTN, CDK1, MYC, PDGFRA, STK25, SORBS3, RGS4, PTK2B, PBK, DVL3, DIRAS1, AJUBA, VANGL2, FOXM1, S1PR2, GADD45G, CAMK2D, DUSP2, FRS2, CIB1, C1QL4, PRKD2	822	678	16130	1.53394	0.0443284	0.0420091
GOTERM_BP	GO:0030810~positive regulation of nucleotide biosynthetic process	14	0.00216186	-2.66517	VIPR2, ADRB1, APOE, RAMP1, TSHR, MYC, MRAP2, CALCRL, STAT3, GPR65, EDNRA, MC4R, GPR161, ABCA1	822	103	16130	2.66719	0.0468441	0.0443933
GOTERM_BP	GO:0030808~regulation of nucleotide biosynthetic process	17	0.00219499	-2.65857	VIPR2, ADRB1, APOE, RAMP1, TSHR, GRM2, GRM8, MYC, MRAP2, CALCRL, STAT3, GPR65, PTK2B, EDNRA, MC4R, GPR161, ABCA1	822	141	16130	2.36588	0.0473091	0.0448339
GOTERM_BP	GO:0030501~positive regulation of bone mineralization	8	0.00232709	-2.63319	FBN2, P2RX7, ACVR2A, CD276, SLC8A1, BMP7, TFAP2A, ANO6	822	37	16130	4.24278	0.0498909	0.0472806
GOTERM_BP	GO:0006269~DNA replication, synthesis of RNA primer	4	0.00234019	-2.63075	PRIM1, POLA1, PRIMPOL, PRIM2	822	6	16130	13.0819	0.0499076	0.0472964
GOTERM_BP	GO:0031297~replication fork processing	7	0.00245391	-2.61014	RAD51, PCNA, BRCA2, MMS22L, PRIMPOL, DDX11, EME1	822	28	16130	4.90572	0.052059	0.0493352
GOTERM_BP	GO:1901992~positive regulation of mitotic cell cycle phase transition	10	0.00247763	-2.60596	CCND1, UBE2C, RAD51B, ESPL1, RCC2, DLGAP5, BIRC5, CDC45, RB1, CDK4	822	58	16130	3.38325	0.0522884	0.0495527
GOTERM_BP	GO:0030334~regulation of cell migration	53	0.00261035	-2.5833	STK10, PRCP, GTSE1, ROCK2, F2R, MPP1, MYADM, ETS1, HYAL2, KIF14, TRPV4, LDB2, NFE2L2, STAT3, CXCR4, GLIPR2, NOTCH1, ADAM9, RGCC, APOE, ITGAV, HAS1, MMP14, CORO1A, SRPX2, RACK1, GNA12, PDPK1, CNN2, MYC, PDGFRA, SRGAP1, SINHCAF, ATOH8, PTK2B, HIF1A, AJUBA, PFN1, THY1, CMKLR1, ARHGEF39, PGF, ANO6, FLNA, SPARC, CAMK2D, NCK1, CIB1, SLC8A1, RCC2, MAPRE1, GNA13, PRKD2	822	685	16130	1.51827	0.0540032	0.0511778
GOTERM_BP	GO:0045937~positive regulation of phosphate metabolic process	75	0.00261139	-2.58313	ROCK2, F2R, FGF13, KIF14, PPP2R5A, PAK2, GRM1, CKS1B, DVL2, TRPV4, MRAP2, STAT3, CXCR4, GLIPR2, ADAM9, TNFRSF19, TNFRSF11A, NOD2, PKN1, RGCC, BIRC7, MAP3K21, ABCA1, MAP3K1, TRPC5, APOE, DUSP22, MAPKAPK3, CD81, SH3GLB1, CCND1, RALB, DENND2B, PIK3CB, GPR65, TPX2, PRKCD, BMP7, RACK1, CHEK2, MC4R, GPR161, PDPK1, ATP6AP1, RPS3, P2RX7, NPTN, TTK, CDK1, MYC, PDGFRA, CALCRL, STK25, SORBS3, PTK2B, HIF1A, …	822	1049	16130	1.40297	0.0540032	0.0511778
GOTERM_BP	GO:0010562~positive regulation of phosphorus metabolic process	75	0.00261139	-2.58313	ROCK2, F2R, FGF13, KIF14, PPP2R5A, PAK2, GRM1, CKS1B, DVL2, TRPV4, MRAP2, STAT3, CXCR4, GLIPR2, ADAM9, TNFRSF19, TNFRSF11A, NOD2, PKN1, RGCC, BIRC7, MAP3K21, ABCA1, MAP3K1, TRPC5, APOE, DUSP22, MAPKAPK3, CD81, SH3GLB1, CCND1, RALB, DENND2B, PIK3CB, GPR65, TPX2, PRKCD, BMP7, RACK1, CHEK2, MC4R, GPR161, PDPK1, ATP6AP1, RPS3, P2RX7, NPTN, TTK, CDK1, MYC, PDGFRA, CALCRL, STK25, SORBS3, PTK2B, HIF1A, …	822	1049	16130	1.40297	0.0540032	0.0511778
GOTERM_BP	GO:0050769~positive regulation of neurogenesis	34	0.0026122	-2.58299	BCL6, NPTN, BDNF, DISC1, BIN1, GLI2, MYC, BAIAP2, STK25, NFE2L2, PTK2B, HIF1A, RIMS1, CXCR4, NOTCH1, CPNE1, DMRTA2, LIMK1, PRMT5, CPNE5, FEZF2, APOE, TRPC5, ASPM, GFAP, PTK7, GDPD5, SOX11, NCK1, ASCL1, PRKN, SMO, BMP7, CRABP2	822	387	16130	1.72397	0.0540032	0.0511778
GOTERM_BP	GO:0030490~maturation of SSU-rRNA	9	0.00268569	-2.57094	RPSA, TSR2, RPS28, SNU13, RPS8, RPS24, RPS16, RPS19, RPS14	822	48	16130	3.67929	0.0552407	0.0523505
GOTERM_BP	GO:0006140~regulation of nucleotide metabolic process	22	0.00273937	-2.56235	P2RX7, VIPR2, ADRB1, APOE, RAMP1, TSHR, GRM2, GRM8, ME1, MYC, MRAP2, CALCRL, STAT3, SLC25A23, GPR65, PTK2B, HIF1A, EDNRA, RACK1, MC4R, GPR161, ABCA1	822	212	16130	2.03634	0.0557983	0.0528789
GOTERM_BP	GO:0008593~regulation of Notch signaling pathway	11	0.00274034	-2.5622	BCL6, ASCL1, MFNG, DLL1, STAT3, NOTCH1, GDPD5, NOD2, BMP7, LFNG, MMP14	822	70	16130	3.08359	0.0557983	0.0528789
GOTERM_BP	GO:0002052~positive regulation of neuroblast proliferation	6	0.00275931	-2.5592	DISC1, HIF1A, ASPM, NOTCH1, SMO, DMRTA2	822	20	16130	5.88686	0.0559035	0.0529787
GOTERM_CC	GO:0022626~cytosolic ribosome	60	4.98525e-42	-41.3023	RPS8, RPS13, RPLP2, RPS7, RPL13A, RPS9, RPS16, RPL34, RPL13, RPL23, RPS24, RPL35, FAU, RPSA, RPS28, RPL12, RPS6, SNU13, RPS18, RPL19, RPL29, RPS14, RPL21, RPS11, RPL35A, RPS3, RPL23A, RPL27, RPL37, RPS12, RPL17, RPL37A, RPL39, RPL22L1, RPS10, RPL6, RPL30, RPS2, RPS23, RPL18, RPS19, RPL14, RPLP1, RPS4X, RPS25, RPS5, RPL4, RPL10A, RPS3A, RPL7, RPL22, RPL24, RPL3, RPS27L, RPL5, RPLP0, RPS17, RPL10, …	820	125	15514	9.08137	3.12077e-39	2.88646e-39
GOTERM_CC	GO:0044391~ribosomal subunit	61	4.98656e-31	-30.3022	RPS8, RPS13, RPLP2, RPS7, RPL13A, RPS9, RPS16, RPL34, RPL13, RPL23, RPS24, RPL35, FAU, RPSA, RPS28, RPL12, RPS6, SNU13, RPS18, RPL19, RPL29, RACK1, RPS14, RPL21, RPS11, RPL35A, RPS3, RPL23A, RPL27, RPL37, RPS12, RPL17, RPL37A, RPL39, RPL22L1, RPS10, RPL6, RPL30, RPS2, RPS23, RPL18, RPS19, RPL14, RPLP1, RPS4X, RPS25, RPS5, RPL4, RPL10A, RPS3A, RPL7, RPL22, RPL24, RPL3, RPS27L, RPL5, RPLP0, RPS17, …	820	189	15514	6.1063	1.56079e-28	1.44361e-28
GOTERM_CC	GO:0044445~cytosolic part	64	1.95669e-27	-26.7085	RPS8, RPS13, RPLP2, RPS7, RPL13A, RPS9, RPS16, RPL34, RPL13, RPL23, HBE1, RPS24, RPL35, FAU, RPSA, RPS28, RPL12, RPS6, SNU13, RPS18, RPL19, RPL29, RPS14, RPL21, RPS11, RPL35A, RPS3, RPL23A, RPL27, RPL37, RPS12, RPL17, RPL37A, RPL39, RPL22L1, RPS10, RPL6, RPL30, RPS2, RPS23, RPL18, RPS19, RPL14, RPLP1, ENO3, RPS4X, RPS25, HPS5, RPS5, RPL4, RPL10A, RPS3A, RPL7, RPL22, RPL24, RPL3, RPS27L, RRM2, RPL…	820	239	15514	5.06631	4.08296e-25	3.77641e-25
GOTERM_CC	GO:0022625~cytosolic large ribosomal subunit	35	9.24645e-26	-25.034	RPL35A, RPL23A, RPL27, RPL37, RPL17, RPL37A, RPLP2, RPL13A, RPL22L1, RPL39, RPL6, RPL30, RPL18, RPL34, RPL13, RPL14, RPL23, RPLP1, RPL4, RPL10A, RPL35, RPL12, RPL7, RPL22, RPL24, RPL3, SNU13, RPL5, RPL19, RPLP0, RPL29, RPL10, RPL21, RPL11, RPL18A	820	68	15514	9.73798	1.44707e-23	1.33842e-23
GOTERM_CC	GO:0005840~ribosome	63	3.79035e-25	-24.4213	RPS8, RPS13, RPLP2, RPS7, RPL13A, RPS9, RPS16, RPL34, RPL13, RPL23, RPS24, RPL35, FAU, RPSA, RPS28, RPL12, RPS6, SNU13, RPS18, RPL19, RPL29, RACK1, RPS14, RPL21, RPS11, RPL35A, RPS3, RPL23A, RPL27, RPL37, RPS12, RPL17, RPL37A, RPL39, RPL22L1, RPS10, RPL6, RPL30, RPS2, RPS23, RPL18, RPS19, RPL14, RPLP1, RPS4X, RPS6KA2, RPS25, RPS5, RPL4, RPL10A, NCK1, RPS3A, RPL7, RPL22, RPL24, RPL3, RPS27L, RPL5,…	820	253	15514	4.71118	4.74552e-23	4.38923e-23
GOTERM_CC	GO:0005829~cytosol	305	9.33283e-25	-24.03	RPS13, SMAD5, PAK2, ARHGEF9, CDK4, NSL1, MIS12, RPL13A, NOTCH1, RHOV, PRMT5, LIMK1, PSTPIP1, RGCC, EIF3H, KIF15, HBE1, MAPKAPK3, TARS1, PHGDH, MTAP, GFAP, ADPRM, AKR1A1, EIF4E, BCO1, RPSA, NAT1, KIF11, CORO1A, PRKCD, RPL19, RPS14, KCTD5, RPL21, RPS11, STAT6, RPS3, PSMA2, RPL23A, IRAK4, CEP152, RASGRF2, RPL37, NDC80, DTYMK, MYC, SEC61A1, CCNB2, AURKB, RPL39, PARP9, CDCA8, SNRPG, RPL30, RPL18, BCL2…	820	3399	15514	1.69769	9.73725e-23	9.00618e-23
GOTERM_CC	GO:0005925~focal adhesion	72	1.6302e-20	-19.7878	RSU1, RPS8, RPS13, ARHGAP31, CTNNA1, RPLP2, RPS7, SCARF2, TRPV4, RPL13A, PPIB, RPS9, RPS16, LPP, LIMK1, ADAM9, RPL23, LIMA1, CD81, ITGAV, CD99, MMP14, RPL12, RPS18, RPL19, P4HB, RPS14, RPS11, GNA12, PDPK1, RPS3, KIF23, RPL27, CNN3, NPM1, VIM, CNN2, TWF1, RPL37A, ANXA5, SORBS3, IRF2, RPS10, RPL6, PTK2B, RPL30, RPS2, RPL18, RPS19, HSPA8, RPLP1, AJUBA, RPS4X, PFN1, THY1, RPS5, RPL4, PTK7, RPL10A, LP…	820	391	15514	3.4839	1.45787e-18	1.34841e-18
GOTERM_CC	GO:0043232~intracellular non-membrane-bounded organelle	330	2.32443e-20	-19.6337	RFC4, MYADM, DISC1, FGF13, RPS13, MAP7D3, NOCT, CDK4, NSL1, MIS12, TACC3, RPL13A, SNAPC1, UHRF1, POLE, PSTPIP1, RGCC, KIF15, TARS1, GFAP, EIF4E, RPSA, KIF11, CORO1A, SEPTIN2, RPL19, RPS14, RPL21, RPS11, HMGB2, CHEK2, STAT6, RPS3, PSMA2, RPL23A, CPEB1, CEP152, RPL37, TOP2A, CNTLN, NDC80, ESCO2, TWF1, EFHC1, MYC, CCNB2, AURKB, RPL39, ANXA11, SH3PXD2B, CDCA8, SNRPG, RPL30, CEP44, RPL18, BCL2L11, RPS…	820	4026	15514	1.55078	1.81886e-18	1.6823e-18
GOTERM_CC	GO:0022627~cytosolic small ribosomal subunit	25	1.44648e-18	-17.8397	RPS3, RPS8, RPS13, RPS12, RPS7, RPS9, RPS10, RPS16, RPS23, RPS2, RPS19, RPS4X, RPS25, RPS24, RPS5, RPSA, FAU, RPS28, RPS3A, RPS27L, RPS6, RPS18, RPS14, RPS17, RPS11	820	48	15514	9.85391	1.00611e-16	9.30567e-17
GOTERM_CC	GO:0015934~large ribosomal subunit	35	1.14155e-16	-15.9425	RPL35A, RPL23A, RPL27, RPL37, RPL17, RPL37A, RPLP2, RPL13A, RPL22L1, RPL39, RPL6, RPL30, RPL18, RPL34, RPL13, RPL14, RPL23, RPLP1, RPL4, RPL10A, RPL35, RPL12, RPL7, RPL22, RPL24, RPL3, SNU13, RPL5, RPL19, RPLP0, RPL29, RPL10, RPL21, RPL11, RPL18A	820	118	15514	5.61172	7.14608e-15	6.60955e-15
GOTERM_CC	GO:0044444~cytoplasmic part	534	1.04842e-14	-13.9795	PRCP, F2R, DISC1, RHO, LMAN2L, SMAD5, PAK2, ARHGEF9, CDK4, MRAP2, SLC25A23, TNFSF13B, HS3ST2, NOTCH1, PROS1, ITPR2, MGST3, PRMT5, ATL3, RGCC, EIF3H, KIF15, MAPKAPK3, TARS1, PHGDH, B3GNT2, GFAP, ADPRM, GDPD5, MMP14, BCO1, RPSA, MFSD2A, NAT1, CORO1A, SEPTIN2, PRKCD, RPL19, RPL21, CHEK2, DGKH, HTR5A, CPEB1, CEP152, RASGRF2, RPL37, NDC80, CNTLN, TAP1, ESCO2, GM2A, DTYMK, MYC, CCNB2, RPL39, ANXA11, CD…	820	8090	15514	1.24883	5.96647e-13	5.5185e-13
GOTERM_CC	GO:0015935~small ribosomal subunit	26	1.15725e-14	-13.9366	RPS3, RPS8, RPS13, RPS12, RPS7, RPS9, RPS10, RPS16, RPS23, RPS2, RPS19, RPS4X, RPS25, RPS24, RPS5, RPSA, FAU, RPS28, RPS3A, RPS27L, RPS6, RPS18, RPS14, RPS17, RACK1, RPS11	820	72	15514	6.83205	6.03699e-13	5.58373e-13
GOTERM_CC	GO:0005819~spindle	50	1.9062e-12	-11.7198	KIF14, MAP7D3, RB1, TACC3, DDX11, KIF4A, HAUS6, BIRC7, KIF15, ASPM, KIFC1, CENPF, KIF11, SEPTIN2, TPX2, DLGAP5, SGO1, RPS3, KIF23, FBXO5, NUSAP1, HAUS1, NPM1, SKA3, KIF20A, EFHC1, SNCG, TTK, CDK1, AURKB, CDC20, ANXA11, CDCA8, CEP44, AURKA, KNTC1, CKAP2L, BIRC5, RACGAP1, KATNA1, RPS6KA2, DNAAF1, ESPL1, BORA, NUMA1, GPSM2, NEDD1, PARP4, RCC2, MAPRE1	820	303	15514	3.12203	9.1791e-11	8.48993e-11
GOTERM_CC	GO:0005737~cytoplasm	654	6.9727e-12	-11.1566	PRCP, F2R, DISC1, RHO, LMAN2L, SMAD5, COMMD2, PAK2, ARHGEF9, TFEB, CDK4, MRAP2, TACC3, SLC25A23, TNFSF13B, HS3ST2, NOTCH1, PROS1, ITPR2, MGST3, LPP, PRMT5, ATL3, RGCC, EIF3H, KIF15, DUSP22, MAPKAPK3, TARS1, PRKD3, PHGDH, B3GNT2, GFAP, ADPRM, MDK, GDPD5, MMP14, BCO1, RPSA, MFSD2A, NAT1, CORO1A, SEPTIN2, NECAB1, PRKCD, RPL19, RPL21, CHEK2, DGKH, HTR5A, CPEB1, CEP152, RASGRF2, RPL37, NDC80, CNTLN, T…	820	10775	15514	1.14834	3.11779e-10	2.88371e-10
GOTERM_CC	GO:0005657~replication fork	21	4.86059e-11	-10.3133	BCL6, RFC4, PCNA, MCM3, PRIM1, MMS22L, POLD2, GINS2, MCM10, POLD1, PIF1, POLA1, RAD51B, POLE2, UHRF1, PRIM2, POLE, CHEK1, CDC45, GINS4, TP53	820	64	15514	6.20796	2.02849e-09	1.87619e-09
GOTERM_CC	GO:0030529~intracellular ribonucleoprotein complex	87	7.03343e-11	-10.1528	ROCK2, RPS8, RPS13, RPLP2, RPS7, NOCT, YBX1, RPL13A, RPS9, RPS16, RPL34, RPL13, EIF3H, RPL23, MOV10, RPS24, IVNS1ABP, RPL35, EIF4E, FAU, RPSA, RPS28, RPL12, RPS6, MSI1, MEX3A, SNU13, RPS18, RPL19, RPL29, RACK1, RPS14, RPL21, RPS11, EIF3F, RPL35A, RPS3, PSMA2, RPL23A, RPL27, CPEB1, RPL37, RPS12, NPM1, EIF3E, RPL17, RPL37A, RPL39, RPL22L1, ZFP36L2, SNRPG, RPS10, RPL6, RPL30, RPS2, RPS23, RPL18, RPS…	820	786	15514	2.09414	2.75183e-09	2.54522e-09
GOTERM_CC	GO:0005694~chromosome	98	8.54797e-11	-10.0681	RFC4, MCMBP, SMC4, EME1, CHAF1B, CDK4, NSL1, POLD1, MIS12, UHRF1, POLE, DTL, SMC2, PRIM1, CENPF, ERCC6L, SEPTIN2, SALL1, MCM5, HMGB2, CHEK2, FANCD2, STAT6, CENPI, TOP2A, ESCO2, NDC80, POLD2, SMC5, TTK, AURKB, CDCA8, RAD51B, CHEK1, BIRC5, SPC24, GINS4, ASF1B, MYBL2, PLK2, NCAPD2, RAD51AP1, NCAPD3, PIF1, POLE2, CENPK, RCC2, NCAPH, CDC45, MMS22L, PPP2R5A, RB1, NFE2L2, STAT3, HELLS, MIS18A, PRIM2, SS…	820	937	15514	1.97878	3.14766e-09	2.91134e-09
GOTERM_CC	GO:0044427~chromosomal part	89	1.74376e-10	-9.75851	RFC4, MCMBP, MMS22L, PPP2R5A, SMC4, EME1, CHAF1B, RB1, CDK4, NSL1, POLD1, MIS12, NFE2L2, STAT3, HELLS, MIS18A, PRIM2, UHRF1, POLE, DDX11, SPC25, SMC2, PRIM1, MCM3, BRCA2, DSCC1, CENPF, NASP, RAD51, BUB1, ERCC6L, POLA1, SEPTIN2, SALL1, MCM5, SGO1, CHEK2, HMGB2, STAT6, CENPI, BCL6, RCC1, SMARCD2, ESCO2, NDC80, POLD2, EIF3E, SKA3, SMC5, TTK, CDK1, AURKB, SINHCAF, CDCA8, RAD51B, ORC1, DVL3, AURKA, KN…	820	827	15514	2.03608	6.06441e-09	5.60909e-09
GOTERM_CC	GO:0031981~nuclear lumen	265	6.38115e-10	-9.1951	RFC4, EXO1, FGF13, RPS13, MAP7D3, SMAD5, SOX3, PAK2, NOCT, CDK4, PHF19, MIS12, RPL13A, SNAPC1, NOTCH1, MCM8, UHRF1, POLE, PRMT5, LIMK1, MAPKAPK3, PRKD3, RPSA, SEPTIN2, NECAB1, PRKCD, RPL19, OSBPL1A, RPS14, RPL21, RPS11, HMGB2, CHEK2, STAT6, RPS3, PSMA2, RPL23A, CPEB1, SNX18, CEP152, TOP2A, NDC80, ESCO2, ATAD2, MYC, STAT4, CCNB2, AURKB, PARP9, ANXA11, BARD1, CDCA8, SNRPG, RPL18, RPS19, BIRC5, NOP5…	820	3592	15514	1.39579	2.10242e-08	1.94457e-08
GOTERM_CC	GO:0000793~condensed chromosome	34	1.69652e-08	-7.77044	RCC1, TOP2A, NDC80, SMC4, SKA3, SMC5, AURKB, NSL1, MIS12, AURKA, KNTC1, CHEK1, BIRC5, DDX11, SPC24, SPC25, SMC2, CENPH, NCAPG, BRCA2, NCAPD2, CENPF, NCAPD3, KNL1, RAD51, BUB1, ERCC6L, SEPTIN2, CENPK, NCAPH, MKI67, SGO1, HMGB2, FANCD2	820	210	15514	3.06316	5.31009e-07	4.91141e-07
GOTERM_CC	GO:0044428~nuclear part	279	3.60992e-08	-7.4425	RFC4, EXO1, FGF13, RPS13, MAP7D3, SMAD5, SOX3, PAK2, NOCT, CDK4, PHF19, MIS12, RPL13A, SNAPC1, NOTCH1, MCM8, UHRF1, POLE, MGST3, PRMT5, LIMK1, MAPKAPK3, PRKD3, RPSA, SEPTIN2, NECAB1, PRKCD, RPL19, OSBPL1A, RPS14, RPL21, RPS11, HMGB2, CHEK2, STAT6, RPS3, PSMA2, DGKH, RPL23A, CPEB1, SNX18, CEP152, TOP2A, NDC80, ESCO2, ATAD2, MYC, STAT4, CCNB2, AURKB, PARP9, ANXA11, BARD1, CDCA8, SNRPG, RPL18, RPS19…	820	3981	15514	1.32593	1.0761e-06	9.95308e-07
GOTERM_CC	GO:0005654~nucleoplasm	221	3.99567e-08	-7.39841	RFC4, EXO1, RPS13, MAP7D3, SMAD5, SOX3, PAK2, NOCT, CDK4, PHF19, SNAPC1, NOTCH1, MCM8, POLE, PRMT5, LIMK1, MAPKAPK3, PRKD3, RPSA, NECAB1, PRKCD, OSBPL1A, RPS14, RPS11, HMGB2, CHEK2, STAT6, RPS3, PSMA2, CPEB1, SNX18, CEP152, TOP2A, ESCO2, ATAD2, MYC, STAT4, CCNB2, AURKB, PARP9, ANXA11, BARD1, CDCA8, SNRPG, RPS19, BIRC5, GINS4, ASF1B, HSPA8, RPS6KA2, PKN2, SH3BGRL2, RAD51AP1, CAMK2D, CIB1, NEDD1, P…	820	2996	15514	1.3956	1.13695e-06	1.05159e-06
GOTERM_CC	GO:0098687~chromosomal region	45	5.54471e-08	-7.25612	CENPI, ESCO2, PPP2R5A, NDC80, SKA3, SMC5, TTK, CDK1, AURKB, NSL1, POLD1, MIS12, CDCA8, ORC1, HELLS, MIS18A, AURKA, KNTC1, CHEK1, BIRC5, SPC24, GAR1, SPC25, CENPH, PCNA, MCM3, BRCA2, NCAPD2, DSCC1, CENPF, NCAPD3, KNL1, RAD51, PIF1, BUB1, ERCC6L, SEPTIN2, SALL1, CENPK, RCC2, MCM7, MKI67, MCM5, SGO1, CHEK2	820	346	15514	2.46063	1.50913e-06	1.39582e-06
GOTERM_CC	GO:0015630~microtubule cytoskeleton	100	8.70099e-08	-7.06043	GTSE1, DISC1, FGF13, MAP7D3, TRPV4, TACC3, RGCC, DTL, MVB12A, KIF15, KIFC1, CENPF, KARS1, WDR35, ERCC6L, KIF11, SEPTIN2, RPS3, CEP152, TOP2A, CNTLN, TTK, KIF20A, EFHC1, CCNB2, AURKB, TFAP2A, ANXA11, CDCA8, CEP44, BCL2L11, CHEK1, BIRC5, RACGAP1, PLK2, RPS6KA2, PKN2, BORA, SASS6, CIB1, GPSM2, NEDD1, SLC8A1, RCC2, PXN, CDC45, ROCK2, KIF14, RPS7, RB1, NFE2L2, ID1, DDX11, KIF4A, HAUS6, BIRC7, KCNAB2, …	820	1100	15514	1.71996	2.26951e-06	2.09911e-06
GOTERM_CC	GO:0070013~intracellular organelle lumen	295	1.8295e-07	-6.73767	RFC4, EXO1, FGF13, RPS13, MAP7D3, SMAD5, SOX3, PAK2, NOCT, CDK4, PHF19, MIS12, RPL13A, SNAPC1, NOTCH1, MCM8, UHRF1, POLE, PROS1, ECI1, PRMT5, LIMK1, MAPKAPK3, PRKD3, MMP14, RPSA, VCAN, SEPTIN2, NECAB1, PRKCD, RPL19, OSBPL1A, RPS14, RPL21, RPS11, HMGB2, CHEK2, STAT6, RPS3, PSMA2, RPL23A, CPEB1, SNX18, CEP152, TOP2A, NDC80, ESCO2, GM2A, DTYMK, ATAD2, MYC, STAT4, CCNB2, AURKB, PARP9, ANXA11, BARD1, …	820	4328	15514	1.28957	4.52907e-06	4.18903e-06
GOTERM_CC	GO:0043596~nuclear replication fork	14	1.88108e-07	-6.72559	PCNA, MCM3, PRIM1, MMS22L, POLD2, GINS2, MCM10, POLD1, POLA1, POLE2, PRIM2, POLE, CDC45, GINS4	820	43	15514	6.15984	4.52907e-06	4.18903e-06
GOTERM_CC	GO:0000775~chromosome, centromeric region	30	2.10342e-07	-6.67707	CENPI, ESCO2, PPP2R5A, NDC80, SKA3, TTK, AURKB, NSL1, MIS12, CDCA8, HELLS, MIS18A, AURKA, KNTC1, BIRC5, SPC24, SPC25, CENPH, NCAPD2, DSCC1, CENPF, NCAPD3, KNL1, BUB1, ERCC6L, SEPTIN2, CENPK, RCC2, MKI67, SGO1	820	189	15514	3.0031	4.87681e-06	4.51066e-06
GOTERM_CC	GO:0005730~nucleolus	82	6.47663e-07	-6.18865	FGF13, ANP32B, RPS13, SDAD1, EME1, RPS7, CDK4, E2F5, RPL13A, RPS9, VEZF1, SNAPC1, RPL34, SSRP1, DDX11, DTL, NFATC3, RPL23, CAMK4, SMC2, ABHD14B, ETV4, ITPR1, RPL35, RAD51, RPL12, PHTF1, WEE1, PIK3CB, POLA1, RPS6, SNU13, SEPTIN2, RPL19, HOMEZ, RPS14, RPL21, RPS11, HMGB2, FANCD2, RPS3, RPL23A, TYMS, NUSAP1, TOP2A, NPM1, EEF1D, MYC, RNF213, NIBAN2, CDCA8, RPS10, ORC1, RPS2, RPS23, RPL18, RPS19, SPC2…	820	882	15514	1.75896	1.43252e-05	1.32497e-05
GOTERM_CC	GO:0044446~intracellular organelle part	503	6.63628e-07	-6.17808	RFC4, DISC1, RHO, LMAN2L, SMAD5, SOX3, PAK2, CDK4, MRAP2, TACC3, SLC25A23, SNAPC1, HS3ST2, NOTCH1, MCM8, POLE, PROS1, ITPR2, MGST3, PRMT5, ATL3, RGCC, KIF15, MAPKAPK3, PRKD3, B3GNT2, GFAP, GDPD5, MMP14, RPSA, MFSD2A, CORO1A, SEPTIN2, NECAB1, PRKCD, RPL19, RPL21, CHEK2, DGKH, CPEB1, CEP152, RASGRF2, RPL37, NDC80, CNTLN, TAP1, ESCO2, EFHC1, GM2A, DTYMK, MYC, CCNB2, RPL39, ANXA11, SH3PXD2B, CDCA8, R…	820	8233	15514	1.1559	1.43252e-05	1.32497e-05
GOTERM_CC	GO:0005856~cytoskeleton	156	1.57895e-06	-5.80163	GTSE1, MPP1, MYADM, DISC1, SLC4A1, FGF13, MAP7D3, AFAP1L1, TRPV4, BAIAP2, TACC3, SEPTIN10, NOD2, PSTPIP1, RGCC, DTL, MVB12A, KIF15, TARS1, PLEKHH3, KIFC1, GFAP, CENPF, KARS1, WDR35, ERCC6L, KIF11, CORO1A, SEPTIN2, RPS3, CEP152, CNN3, RIN1, TOP2A, CNTLN, TTK, TWF1, KIF20A, EFHC1, CNN2, CCNB2, AURKB, TFAP2A, OPHN1, STK17B, VCAM1, ANXA11, SH3PXD2B, CDCA8, CEP44, BCL2L11, CHEK1, BIRC5, RACGAP1, PLK2,…	820	2054	15514	1.43692	3.29474e-05	3.04737e-05
GOTERM_CC	GO:0005813~centrosome	53	1.78307e-06	-5.74883	ROCK2, DISC1, MAP7D3, NFE2L2, ID1, DDX11, HAUS6, RGCC, DTL, MVB12A, KIF15, MCM3, BRCA2, CENPF, WDR35, ERCC6L, SNX10, DLGAP5, SGO1, KIF23, DDAH2, CEP152, HAUS1, TOP2A, NPM1, CNTLN, EFHC1, CDK1, CCNB2, AURKB, TFAP2A, CDC20, CEP44, AURKA, CHEK1, CKAP2L, BIRC5, PLK2, KATNA1, PCNA, NCAPG, PKN2, ESPL1, CCDC14, CNTRL, NUMA1, SASS6, CIB1, NEDD1, MAPRE1, CEP55, CDC45, MARCKS	820	496	15514	2.02164	3.5295e-05	3.26451e-05
GOTERM_CC	GO:0005815~microtubule organizing center	64	1.80422e-06	-5.74371	ROCK2, DISC1, MAP7D3, RPS7, TACC3, NFE2L2, ID1, DDX11, HAUS6, RGCC, DTL, MVB12A, KIF15, MCM3, BRCA2, KIFC1, CENPF, RAD51, WDR35, ERCC6L, SNX10, DLGAP5, SGO1, RASSF7, KIF23, DDAH2, CEP152, HAUS1, TOP2A, NPM1, CNTLN, RPP25, EFHC1, SNCG, CDK1, CCNB2, AURKB, CLIC5, TFAP2A, CDC20, PSKH1, FIGN, CEP44, AURKA, CHEK1, CKAP2L, BIRC5, PLK2, KATNA1, AJUBA, PCNA, NCAPG, PKN2, ESPL1, CCDC14, CNTRL, NUMA1, SASS…	820	647	15514	1.87148	3.5295e-05	3.26451e-05
GOTERM_CC	GO:0000796~condensin complex	6	2.32539e-06	-5.6335	SMC2, NCAPG, NCAPD2, SMC4, NCAPH, NCAPD3	820	6	15514	18.9195	4.4112e-05	4.08001e-05
GOTERM_CC	GO:0044430~cytoskeletal part	121	8.558e-06	-5.06763	GTSE1, MYADM, DISC1, FGF13, MAP7D3, AFAP1L1, TRPV4, TACC3, RGCC, DTL, MVB12A, KIF15, KIFC1, GFAP, CENPF, WDR35, ERCC6L, KIF11, CORO1A, SEPTIN2, RPS3, CEP152, TOP2A, CNTLN, TTK, KIF20A, EFHC1, CNN2, CCNB2, AURKB, TFAP2A, VCAM1, ANXA11, SH3PXD2B, CDCA8, CEP44, BCL2L11, CHEK1, BIRC5, RACGAP1, PLK2, RPS6KA2, PKN2, VANGL2, BORA, LPXN, RSPH9, SASS6, MYBPC2, CIB1, GPSM2, NEDD1, SLC8A1, RCC2, PXN, CDC45,…	820	1547	15514	1.47981	0.000157568	0.000145738
GOTERM_CC	GO:0000922~spindle pole	21	2.15064e-05	-4.66743	DNAAF1, HAUS1, ASPM, NPM1, CENPF, NUMA1, AURKB, CDC20, TACC3, KIF11, GPSM2, NEDD1, TPX2, CEP44, DLGAP5, AURKA, KNTC1, CKAP2L, DDX11, SGO1, KATNA1	820	133	15514	2.98729	0.000384657	0.000355777
GOTERM_CC	GO:0070062~extracellular exosome	195	2.30575e-05	-4.63719	CYRIB, PRCP, DAD1, MYADM, RPS13, CD276, CXCR4, PROS1, ECI1, MGST3, EIF3H, PLD3, APOE, TARS1, PHGDH, GNG5, MTAP, APOC1, B3GNT2, CHL1, AKR1A1, EIF4E, RPSA, CORO1A, SEPTIN2, PRKCD, OSBPL1A, RPS14, RPS11, RPS3, PSMA2, RPL23A, SNX18, CNTLN, GM2A, ATAD2, ANXA5, ANXA11, RPL30, RPS19, HSPA8, CPNE5, ENO3, PFN1, SH3BGRL2, RPL22, CIB1, GNA13, SLC2A3, PRPH, TGFBI, STXBP1, YBX1, PPIB, GLIPR2, RPL34, PXDN, SER…	820	2811	15514	1.31245	0.000400945	0.000370842
GOTERM_CC	GO:0000228~nuclear chromosome	53	4.17381e-05	-4.37947	MCMBP, MMS22L, EME1, CHAF1B, POLD1, MIS12, STAT3, PRIM2, UHRF1, POLE, DDX11, SMC2, PRIM1, MCM3, BRCA2, NASP, RAD51, BUB1, POLA1, MCM5, SGO1, HMGB2, STAT6, RCC1, SMARCD2, TOP2A, ESCO2, NDC80, POLD2, CDK1, AURKB, SINHCAF, ORC1, DVL3, AURKA, CHEK1, BIRC5, GAR1, ASF1B, GINS4, TP53, PCNA, CECR2, NCAPD2, RAD51AP1, GINS2, NCAPD3, MCM10, PIF1, POLE2, MCM7, CDC45, NR1D1	820	555	15514	1.80673	0.000706163	0.000653145
GOTERM_CC	GO:0044454~nuclear chromosome part	49	0.000113157	-3.94632	MCMBP, MMS22L, EME1, CHAF1B, POLD1, MIS12, STAT3, PRIM2, UHRF1, POLE, DDX11, PRIM1, MCM3, BRCA2, NASP, RAD51, BUB1, POLA1, MCM5, SGO1, HMGB2, STAT6, RCC1, SMARCD2, ESCO2, NDC80, POLD2, CDK1, AURKB, SINHCAF, ORC1, DVL3, AURKA, GAR1, ASF1B, GINS4, TP53, PCNA, CECR2, NCAPD2, RAD51AP1, GINS2, NCAPD3, MCM10, PIF1, POLE2, MCM7, CDC45, NR1D1	820	519	15514	1.78624	0.00186411	0.00172415
GOTERM_CC	GO:0030894~replisome	9	0.000120713	-3.91825	POLD1, PCNA, PRIM1, MCM3, POLA1, POLE2, POLD2, PRIM2, POLE	820	30	15514	5.67585	0.0019376	0.00179213
GOTERM_CC	GO:0000776~kinetochore	19	0.000197661	-3.70408	CENPI, SPC25, CENPH, NDC80, CENPF, SKA3, TTK, KNL1, AURKB, NSL1, BUB1, MIS12, ERCC6L, SEPTIN2, CENPK, KNTC1, BIRC5, SGO1, SPC24	820	132	15514	2.72326	0.0030934	0.00286115
GOTERM_CC	GO:0005876~spindle microtubule	12	0.000226468	-3.64499	KIF11, NUSAP1, PARP4, AURKA, KNTC1, SKA3, BIRC5, CDK1, NUMA1, KIF4A, BIRC7, AURKB	820	59	15514	3.84804	0.00345778	0.00319817
GOTERM_CC	GO:0099568~cytoplasmic region	32	0.000260144	-3.58479	MPP1, MYADM, WLS, SLC4A1, GM2A, KCNAB1, TRPV4, CLIC5, STXBP6, PTK2B, HIF1A, ITPR2, KIF4A, FMNL1, MELK, MYO10, AP3B1, PFN1, MYO9B, CABP1, NUMA1, FLNA, RALB, GPSM2, CORO1A, EXOC3L4, SEPTIN2, PXN, MAPRE1, TRIP10, MARCKS, AP3M1	820	299	15514	2.02483	0.00387738	0.00358626
GOTERM_CC	GO:0000777~condensed chromosome kinetochore	16	0.000320666	-3.49395	SPC25, CENPH, NDC80, CENPF, SKA3, KNL1, NSL1, BUB1, MIS12, ERCC6L, SEPTIN2, CENPK, KNTC1, BIRC5, SGO1, SPC24	820	103	15514	2.93895	0.00466831	0.00431781
GOTERM_CC	GO:0043601~nuclear replisome	8	0.000625438	-3.20382	POLD1, PRIM1, MCM3, POLA1, POLE2, POLD2, PRIM2, POLE	820	29	15514	5.21918	0.00889828	0.0082302
GOTERM_CC	GO:0072686~mitotic spindle	11	0.000948922	-3.02277	RPS3, KIF23, GPSM2, ASPM, ESPL1, RCC2, AURKA, EFHC1, RACGAP1, CDK1, NUMA1	820	59	15514	3.52737	0.0132006	0.0122095
GOTERM_CC	GO:0032133~chromosome passenger complex	4	0.00135287	-2.86875	CDCA8, AURKA, BIRC5, AURKB	820	5	15514	15.1356	0.0184107	0.0170285
GOTERM_CC	GO:0005938~cell cortex	26	0.00139653	-2.85495	MPP1, MYADM, SLC4A1, GM2A, TRPV4, CLIC5, STXBP6, PTK2B, ITPR2, FMNL1, MELK, MYO10, PFN1, MYO9B, CABP1, NUMA1, FLNA, RALB, GPSM2, CORO1A, EXOC3L4, SEPTIN2, PXN, MAPRE1, TRIP10, MARCKS	820	247	15514	1.99153	0.0186006	0.017204
GOTERM_CC	GO:0030315~T-tubule	9	0.00162858	-2.78819	CAMK2D, DYSF, KCNJ3, BIN1, SLC8A1, CACNA2D1, SRI, CACNB2, CACNB3	820	43	15514	3.9599	0.0212394	0.0196448
GOTERM_CC	GO:0000780~condensed nuclear chromosome, centromeric region	6	0.00253339	-2.5963	BUB1, MIS12, NDC80, AURKA, SGO1, AURKB	820	19	15514	5.97458	0.0323653	0.0299354
GOTERM_CC	GO:0005658~alpha DNA polymerase:primase complex	4	0.00259955	-2.5851	PRIM1, MCM3, POLA1, PRIM2	820	6	15514	12.613	0.0325464	0.0301028
GOTERM_MF	GO:0019843~rRNA binding	19	2.21573e-09	-8.65448	RPL23, RPS3, RPLP1, RPL23A, RPS4X, RPL37, RPS13, RPS5, RPLP2, RPL12, RPS9, RPL3, RPS18, RPL5, RPL19, RPLP0, RPS14, RPS11, RPL11	650	62	12075	5.69293	8.1539e-07	7.91017e-07
GOTERM_MF	GO:0019901~protein kinase binding	62	1.23086e-08	-7.90979	HYAL2, KIF14, PAK2, CKS1B, STXBP1, DVL2, TRPV4, CCNE2, STAT3, MAML1, NCS1, ADAM9, NOD2, PKN1, RGCC, MAP3K1, ITGAV, STK38, CCND1, RAB13, POLA1, KIF11, RPS6, RPS18, TPX2, PRKN, PRKCD, RACK1, CHEK2, CACNB3, PDPK1, RPS3, CEP152, CDKN2C, FBXO5, TOP2A, NPM1, CNTLN, KIF20A, PTK2B, HIF1A, AURKA, RPS19, RACGAP1, DIRAS1, TP53, PCNA, THY1, FOXM1, BORA, NCK1, TNIP2, DUSP2, FRS2, CKS2, CIB1, PXN, RCC2, CCNA2,…	650	531	12075	2.16906	2.26478e-06	2.19708e-06
GOTERM_MF	GO:0098641~cadherin binding involved in cell-cell adhesion	39	2.95924e-07	-6.52882	RPL23A, CNN3, PAK2, PAK6, EEF1D, EIF3E, CTNNA1, CNN2, TWF1, CCNB2, NIBAN2, BAIAP2, STXBP6, RPL6, SNX5, RPS2, RPL34, HSPA8, EEF1G, RPL14, PPP1R13L, LIMA1, MPP7, PFN1, PKN2, PLCB3, ESYT2, STK38, SH3GLB1, FLNA, NCK1, ARFIP1, ALDOA, RPL24, WASF2, SEPTIN2, MAPRE1, RPL29, RACK1	650	290	12075	2.49828	3.33903e-05	3.23923e-05
GOTERM_MF	GO:0044822~poly(A) RNA binding	105	3.62939e-07	-6.44017	RPS8, RPS13, NOCT, RPL13A, RPS16, EIF3H, RPS24, RPL35, EIF4E, RPSA, CORO1A, RPL19, RPS14, RPL21, RPS11, HMGB2, RPS3, RPL23A, RPL27, CPEB1, TOP2A, RPL17, ANXA11, SNRPG, RPL30, RPS2, RPS19, NOP53, HSPA8, RPL14, LARP1B, PFN1, PDIA4, PKN2, NOP2, RPS5, RPL4, RPL10A, RPL22, DHFR, RPL5, RCC2, FTSJ3, RPLP0, RPL10, RPL18A, ROCK2, MANF, SEC61B, CTNNA1, RPS7, STXBP1, YBX1, PPIB, RPS9, SERPINH1, SSRP1, RPL13…	650	1196	12075	1.63092	3.33903e-05	3.23923e-05
GOTERM_MF	GO:0005524~ATP binding	110	0.000450556	-3.34625	RFC4, UBE2C, ACSL4, ABCG4, SMC4, PAK2, CDK4, TRPV4, CDK15, GART, STK36, MCM8, NOD2, LIMK1, ABCA1, MELK, KIF15, SMC2, MAPKAPK3, TARS1, PRKD3, KIFC1, KARS1, OBSCN, ERCC6L, WEE1, PIK3CB, KIF11, ATP13A2, PRKCD, PIP5K1B, MCM5, CHEK2, ABCC4, PDPK1, DGKH, P2RX7, IRAK4, TOP2A, TAP1, PAK6, DTYMK, SMC5, TTK, TWF1, KIF20A, ATAD2, PDGFRA, AURKB, STK17B, STK25, RAD51B, DCLK1, CHEK1, TK1, HSPA8, PLK2, GALK1, R…	650	1495	12075	1.36686	0.0331609	0.0321697
GOTERM_MF	GO:0030554~adenyl nucleotide binding	112	0.000640686	-3.19335	RFC4, UBE2C, ACSL4, ABCG4, SMC4, PAK2, CDK4, TRPV4, CDK15, GART, STK36, MCM8, NOD2, LIMK1, ABCA1, MELK, KIF15, SMC2, MAPKAPK3, TARS1, PRKD3, KIFC1, KARS1, OBSCN, ERCC6L, WEE1, PIK3CB, KIF11, ATP13A2, PRKCD, PIP5K1B, MCM5, CHEK2, ABCC4, PDPK1, DGKH, P2RX7, IRAK4, TOP2A, TAP1, PAK6, DTYMK, SMC5, TTK, TWF1, KIF20A, ATAD2, PDGFRA, AURKB, STK17B, STK25, RAD51B, DCLK1, CHEK1, TK1, HSPA8, PLK2, GALK1, P…	650	1542	12075	1.3493	0.0379514	0.0368169
GOTERM_MF	GO:0032559~adenyl ribonucleotide binding	111	0.000721901	-3.14152	RFC4, UBE2C, ACSL4, ABCG4, SMC4, PAK2, CDK4, TRPV4, CDK15, GART, STK36, MCM8, NOD2, LIMK1, ABCA1, MELK, KIF15, SMC2, MAPKAPK3, TARS1, PRKD3, KIFC1, KARS1, OBSCN, ERCC6L, WEE1, PIK3CB, KIF11, ATP13A2, PRKCD, PIP5K1B, MCM5, CHEK2, ABCC4, PDPK1, DGKH, P2RX7, IRAK4, TOP2A, TAP1, PAK6, DTYMK, SMC5, TTK, TWF1, KIF20A, ATAD2, PDGFRA, AURKB, STK17B, STK25, RAD51B, DCLK1, CHEK1, TK1, HSPA8, PLK2, GALK1, R…	650	1531	12075	1.34686	0.0379514	0.0368169
GOTERM_MF	GO:0004672~protein kinase activity	55	0.000947121	-3.02359	STK10, ROCK2, PAK2, CDK4, CDK15, STK36, LIMK1, PKN1, PHKG1, MAP3K21, MELK, CAMK4, MAP3K1, MAPKAPK3, PRKD3, STK38, OBSCN, BUB1, CCND1, CERT1, WEE1, PRKCD, CHEK2, PDPK1, WNK2, NPTN, IRAK4, PAK6, TTK, TWF1, PDK2, CDK1, PDGFRA, CCNB2, AURKB, MATK, STK17B, STK25, PTK2B, ACVR2A, PSKH1, PBK, DCLK1, AURKA, CHEK1, PLK2, RPS6KA2, PKN2, EPHB4, PTK7, CNTRL, CAMK2D, KCNH4, EPHA6, PRKD2	650	652	12075	1.56707	0.0435676	0.0422653
GOTERM_MF	GO:0022836~gated channel activity	32	0.00211743	-2.67419	P2RX7, KCNA2, KCNJ3, SLC17A7, KCNJ9, CACNA2D1, KCNAB1, TMEM37, TRPV4, CLIC5, GLRA2, KCNJ12, PTK2B, NCS1, GRIN2A, ITPR2, TMEM38A, REST, ASIC2, KCNK9, GABRA1, KCNAB2, ITGAV, ITPR1, KCNA1, ANO6, KCNH4, TMC2, KCNB2, CACNB2, GABRB2, CACNB3	650	334	12075	1.77982	0.0865794	0.0839914
GOTERM_MF	GO:0032550~purine ribonucleoside binding	125	0.00422602	-2.37407	RFC4, UBE2C, ACSL4, ABCG4, SMC4, PAK2, CDK4, TRPV4, CDK15, GART, STK36, MCM8, RHOV, SEPTIN10, NOD2, LIMK1, ATL3, ABCA1, MELK, KIF15, SMC2, MAPKAPK3, TARS1, PRKD3, KIFC1, KARS1, OBSCN, ERCC6L, WEE1, PIK3CB, KIF11, SEPTIN2, ATP13A2, PRKCD, PIP5K1B, MCM5, CHEK2, ABCC4, PDPK1, DGKH, P2RX7, IRAK4, TOP2A, TAP1, PAK6, DTYMK, SMC5, TTK, TWF1, KIF20A, ATAD2, PDGFRA, AURKB, STK17B, STK25, RAD51B, DCLK1, CH…	650	1850	12075	1.2552	0.155518	0.150869
GOTERM_MF	GO:0005216~ion channel activity	37	0.00530221	-2.27554	P2RX7, KCNA2, KCNJ3, SLC17A7, KCNJ9, CACNA2D1, KCNAB1, MCOLN2, TMEM37, TRPV4, ASIC4, CLIC5, GLRA2, KCNJ12, PTK2B, NCS1, GRIN2A, ITPR2, ORAI1, TMEM38A, REST, GAR1, ASIC2, KCNK9, GABRA1, TRPC5, KCNAB2, ITGAV, ITPR1, KCNA1, ANO6, KCNH4, TMC2, KCNB2, CACNB2, GABRB2, CACNB3	650	429	12075	1.60221	0.167559	0.162551
GOTERM_MF	GO:0022838~substrate-specific channel activity	38	0.0054639	-2.2625	P2RX7, KCNA2, KCNJ3, SLC17A7, KCNJ9, CACNA2D1, KCNAB1, MCOLN2, TMEM37, TRPV4, ASIC4, CLIC5, GLRA2, KCNJ12, PTK2B, NCS1, GRIN2A, ITPR2, ORAI1, TMEM38A, REST, GAR1, AQP7, ASIC2, KCNK9, GABRA1, TRPC5, KCNAB2, ITGAV, ITPR1, KCNA1, ANO6, KCNH4, TMC2, KCNB2, CACNB2, GABRB2, CACNB3	650	445	12075	1.58634	0.167559	0.162551
GOTERM_MF	GO:0017076~purine nucleotide binding	126	0.00723435	-2.1406	RFC4, UBE2C, ACSL4, ABCG4, SMC4, PAK2, CDK4, TRPV4, CDK15, GART, STK36, MCM8, RHOV, SEPTIN10, NOD2, LIMK1, ATL3, ABCA1, MELK, KIF15, SMC2, MAPKAPK3, TARS1, PRKD3, KIFC1, KARS1, OBSCN, ERCC6L, WEE1, PIK3CB, KIF11, SEPTIN2, ATP13A2, PRKCD, PIP5K1B, MCM5, CHEK2, ABCC4, PDPK1, DGKH, P2RX7, IRAK4, TOP2A, TAP1, PAK6, DTYMK, SMC5, TTK, TWF1, KIF20A, ATAD2, PDGFRA, AURKB, STK17B, STK25, RAD51B, DCLK1, CH…	650	1897	12075	1.23389	0.202798	0.196736
GOTERM_MF	GO:0032555~purine ribonucleotide binding	125	0.00771514	-2.11266	RFC4, UBE2C, ACSL4, ABCG4, SMC4, PAK2, CDK4, TRPV4, CDK15, GART, STK36, MCM8, RHOV, SEPTIN10, NOD2, LIMK1, ATL3, ABCA1, MELK, KIF15, SMC2, MAPKAPK3, TARS1, PRKD3, KIFC1, KARS1, OBSCN, ERCC6L, WEE1, PIK3CB, KIF11, SEPTIN2, ATP13A2, PRKCD, PIP5K1B, MCM5, CHEK2, ABCC4, PDPK1, DGKH, P2RX7, IRAK4, TOP2A, TAP1, PAK6, DTYMK, SMC5, TTK, TWF1, KIF20A, ATAD2, PDGFRA, AURKB, STK17B, STK25, RAD51B, DCLK1, CH…	650	1884	12075	1.23255	0.202798	0.196736
GOTERM_MF	GO:0003697~single-stranded DNA binding	13	0.00844039	-2.07364	PRIM1, BRCA2, RAD51AP1, MCM10, YBX1, RAD51, RAD51B, PRIM2, MCM7, CDC45, DDX11, HMGB2, NEIL3	650	102	12075	2.36765	0.207071	0.200881
GOTERM_MF	GO:0032553~ribonucleotide binding	125	0.0100792	-1.99657	RFC4, UBE2C, ACSL4, ABCG4, SMC4, PAK2, CDK4, TRPV4, CDK15, GART, STK36, MCM8, RHOV, SEPTIN10, NOD2, LIMK1, ATL3, ABCA1, MELK, KIF15, SMC2, MAPKAPK3, TARS1, PRKD3, KIFC1, KARS1, OBSCN, ERCC6L, WEE1, PIK3CB, KIF11, SEPTIN2, ATP13A2, PRKCD, PIP5K1B, MCM5, CHEK2, ABCC4, PDPK1, DGKH, P2RX7, IRAK4, TOP2A, TAP1, PAK6, DTYMK, SMC5, TTK, TWF1, KIF20A, ATAD2, PDGFRA, AURKB, STK17B, STK25, RAD51B, DCLK1, CH…	650	1900	12075	1.22217	0.231821	0.224892
GOTERM_MF	GO:0016538~cyclin-dependent protein serine/threonine kinase regulator activity	6	0.0133109	-1.87579	CCND1, CKS2, CDKN2C, CDK4, CKS1B, CCNE2	650	27	12075	4.12821	0.288141	0.279528
GOTERM_MF	GO:0008017~microtubule binding	21	0.0143113	-1.84432	RPS3, KIF15, KIF23, FGF13, NUSAP1, KIF14, CNN3, MAP7D3, KIFC1, KIF20A, NUMA1, TPT1, TRPV4, KIF11, BCL2L11, RCC2, MAPRE1, BIRC5, RACGAP1, KIF4A, KATNA1	650	219	12075	1.78135	0.292587	0.283841
GOTERM_MF	GO:0004536~deoxyribonuclease activity	10	0.0202408	-1.69377	POLD1, RAD51, RPS3, EXO1, DNASE2, RAD51B, POLE, MGME1, EME1, NEIL3	650	76	12075	2.44433	0.392032	0.380314
GOTERM_MF	GO:0031267~small GTPase binding	25	0.0243946	-1.61271	ATP6AP1, ROCK2, RIN1, DVL2, STXBP6, SRGAP1, UNC13D, RIMS1, DVL3, BIRC5, PKN1, SGSM2, FMNL1, ABCA1, PFN1, PEX5L, MYO9B, FLNA, IQGAP2, FMNL3, CIB1, RIN3, RCC2, STXBP5, AP3M1	650	291	12075	1.59596	0.44886	0.435443
GOTERM_MF	GO:0034061~DNA polymerase activity	7	0.0263625	-1.57901	POLD1, POLA1, POLE2, POLD2, PRIMPOL, PRIM2, POLE	650	43	12075	3.02415	0.461972	0.448163
GOTERM_MF	GO:1901981~phosphatidylinositol phosphate binding	13	0.0276805	-1.55783	SNX18, PFN1, NPM1, PLCD1, TWF1, STXBP6, ARFIP1, IQGAP2, SH3PXD2B, CERT1, NCF4, RACGAP1, MYO10	650	120	12075	2.0125	0.463019	0.449179
GOTERM_MF	GO:0015929~hexosaminidase activity	4	0.0360897	-1.44262	HYAL2, NAGA, GM2A, NAGLU	650	14	12075	5.30769	0.577436	0.560175
GOTERM_MF	GO:0023026~MHC class II protein complex binding	4	0.0512962	-1.28992	ANXA11, CD81, ATP1B1, HSPA8	650	16	12075	4.64423	0.760626	0.73789
GOTERM_MF	GO:0051015~actin filament binding	13	0.051673	-1.28674	LIMA1, AJUBA, BIN1, CTNNA1, TRPV4, FLNA, IQGAP2, TPM3, CORO1A, CACNB2, MARCKS, FMNL1, MYO10	650	132	12075	1.82955	0.760626	0.73789
GOTERM_MF	GO:0008066~glutamate receptor activity	5	0.0543179	-1.26506	PTK2B, GRM2, GRIN2A, GRM1, GRM8	650	27	12075	3.44017	0.768808	0.745827
GOTERM_MF	GO:0008324~cation transmembrane transporter activity	43	0.0661113	-1.17972	ATP6AP1, P2RX7, KCNA2, KCNJ3, SLC17A7, KCNJ9, CACNA2D1, ATP6V0E1, KCNAB1, MCOLN2, TMEM37, TRPV4, ASIC4, SLC45A4, KCNJ12, NCS1, GRIN2A, ATP1B1, ITPR2, ORAI1, TMEM38A, REST, GAR1, ASIC2, KCNK9, SLC44A2, TRPC5, KCNAB2, ITGAV, ITPR1, KCNA1, ANO6, KCNH4, ATP13A2, SLC8A1, TMC2, MAGT1, KCNB2, SLC2A6, CACNB2, SLC12A4, CYB5A, CACNB3	650	616	12075	1.29677	0.901073	0.874139
GOTERM_MF	GO:0016462~pyrophosphatase activity	55	0.0714383	-1.14607	RFC4, KIF14, ABCG4, ATP6V0E1, TNNT3, HELLS, MCM8, ATP1B1, DDX11, ATL3, KIF4A, ABCA1, KIF15, MCM3, MOV10, GNG5, MYO9B, KIFC1, DSCC1, ADPRM, RND1, RAD51, RAB13, RALB, ERCC6L, KIF11, ABCD1, ATP13A2, GBP2, ABCC12, MCM5, ABCC4, GNA12, ATP6AP1, KIF23, TOP2A, TAP1, KIF20A, ATAD2, RNF213, ATL2, RAD51B, FIGN, DIRAS1, GINS4, HSPA8, MYO10, KATNA1, NUDT5, GINS2, PIF1, MCM7, GNA13, DNALI1, CDC45	650	824	12075	1.23996	0.938903	0.910838
GOTERM_MF	GO:0043566~structure-specific DNA binding	13	0.0835282	-1.07817	RPS3, BCL6, RCC1, SMARCD2, HMGN2, RAD51, PIF1, STAT3, RAD51B, NOTCH1, DDX11, HMGB2, NEIL3	650	143	12075	1.68881	1	0.972752
GOTERM_MF	GO:0015276~ligand-gated ion channel activity	13	0.0904044	-1.04381	GABRA1, P2RX7, KCNJ3, SLC17A7, KCNJ9, ITPR1, GLRA2, KCNJ12, PTK2B, GRIN2A, ITPR2, GABRB2, ASIC2	650	145	12075	1.66552	1	0.972752
GOTERM_MF	GO:0008528~G-protein coupled peptide receptor activity	12	0.0982494	-1.00767	ACKR4, F2R, RAMP1, TSHR, EDNRA, CXCR4, CMKLR1, CCR9, TACR3, MC4R, TACR2, CALCRL	650	132	12075	1.68881	1	0.972752

## Sheet: 3dpl-GBM_shared_genes
Category	Term	Count	PValue	log10(Pvalue)	Genes	List.Total	Pop.Hits	Pop.Total	Fold.Enrichment	Benjamini	FDR
GOTERM_BP	GO:0072599~establishment of protein localization to endoplasmic reticulum	63	4.16931e-40	-39.3799	RPS8, RPS13, SEC61B, RPLP2, RPS7, RPL13A, RPS21, RPS9, RPS16, RPL34, RPL13, RPL23, RPS15, SSR3, RPL35, FAU, RPSA, RPS28, RPL12, RPS6, UBA52, RPS18, RPL19, RPL29, RPS14, RPL21, RPS11, RPL35A, RPS3, RPL23A, RPL27, RPS12, RPL17, RPL37A, SEC61A1, RPL36, SEC61G, RPL39, RPS10, RPL6, RPL30, RPS2, RPS23, RPL18, RPL38, RPS19, RPL14, RPLP1, RPS4X, RPS25, RPS5, RPL4, RPL10A, RPS3A, PMM2, RPL7, RPL24, RPL5, …	1288	108	16130	7.30525	1.99919e-36	1.8345e-36
GOTERM_BP	GO:0006612~protein targeting to membrane	74	5.44305e-32	-31.2642	ANXA2, RPS8, RPS13, SEC61B, RPLP2, RPS7, RPL13A, RPS21, RPS9, ERBB2, RPS16, RPL34, RPL13, RPL23, NCF1, TRAM1, PACS1, RPS15, SSR3, RPL35, TRAM2, FAU, RPSA, RPS28, RPL12, RPS6, UBA52, RPS18, RPL19, KCNB2, RPL29, RPS14, RPL21, RPS11, RPL35A, RPS3, RPL23A, RPL27, RPS12, RPL17, RPL37A, SEC61A1, MYO1C, RPL36, RPL39, RPS10, RPL6, RPL30, RPS2, RPS23, RPL18, RPL38, RPS19, TESC, RPL14, RPLP1, RPS4X, GOLGA7…	1288	190	16130	4.87749	1.30497e-28	1.19747e-28
GOTERM_BP	GO:1903047~mitotic cell cycle process	171	2.75946e-28	-27.5592	GTSE1, UBE2C, ANXA1, SMC4, LZTS2, EME1, ODF2, PRC1, CKS1B, CDK4, NSL1, SPRY1, MIS12, TACC3, NEK6, FANCI, MCM8, POLE, PTTG1, CDC6, MELK, GFI1, KIF15, SMC2, ORC6, PRIM1, PSMB8, KIFC1, CENPF, CCND1, ERCC6L, WEE1, KIF11, SEPTIN2, UBA52, MAD2L1, MCM5, STIL, CHEK2, RPA3, RPS3, PSMA2, CEP152, TOP2A, MCM6, NDC80, GPNMB, CENPE, PSMB10, CCNB1, SMC5, TTK, KIF20A, CCNB2, AURKB, CDCA8, RAD51B, LRP5, CHEK1, BI…	1288	890	16130	2.40616	4.41054e-25	4.04721e-25
GOTERM_BP	GO:0019080~viral gene expression	64	2.01191e-23	-22.6964	RPS8, RPS13, TRIM62, RPLP2, RPS7, RPL13A, RPS21, RPS9, RPS16, RPL34, RPL13, REST, RPL23, RPS15, RPL35, FAU, RPSA, RPS28, RPL12, RPS6, UBA52, RPS18, RPL19, RPL29, RPS14, RPL21, RPS11, EIF3F, RPL35A, RPS3, RPL23A, RPL27, RPS12, RPL17, RPL37A, RPL36, RPL39, RPS10, RPL6, RPL30, RPS2, RPS23, RPL18, RPL38, EIF3B, RPS19, RPL14, RPLP1, RPS4X, PFN1, RPS25, RPS5, RPL4, RPL10A, RPS3A, RPL7, RPL24, MDFIC, RP…	1288	192	16130	4.17443	1.99516e-20	1.83081e-20
GOTERM_BP	GO:0019083~viral transcription	62	2.08046e-23	-22.6818	RPS8, RPS13, TRIM62, RPLP2, RPS7, RPL13A, RPS21, RPS9, RPS16, RPL34, RPL13, REST, RPL23, RPS15, RPL35, FAU, RPSA, RPS28, RPL12, RPS6, UBA52, RPS18, RPL19, RPL29, RPS14, RPL21, RPS11, RPL35A, RPS3, RPL23A, RPL27, RPS12, RPL17, RPL37A, RPL36, RPL39, RPS10, RPL6, RPL30, RPS2, RPS23, RPL18, RPL38, RPS19, RPL14, RPLP1, RPS4X, PFN1, RPS25, RPS5, RPL4, RPL10A, RPS3A, RPL7, RPL24, MDFIC, RPL5, RPLP0, RPS…	1288	181	16130	4.28975	1.99516e-20	1.83081e-20
GOTERM_BP	GO:0090150~establishment of protein localization to membrane	88	6.31243e-21	-20.1998	ROCK2, F11R, ANXA2, RPS8, RPS13, SEC61B, RPLP2, RPS7, RPL13A, RPS21, RPS9, ERBB2, RPS16, RPL34, ATP1B1, NPC1, RPL13, RPL23, MAPK8, NCF1, TRAM1, PACS1, RPS15, SSR3, RPL35, SH3GLB1, TRAM2, FAU, RPSA, RPS28, RPL12, RAB13, RPS6, UBA52, RPS18, RPL19, KCNB2, RPL29, RACK1, RPS14, RPL21, CACNB2, RPS11, PDPK1, RPL35A, RPS3, RPL23A, RPL27, RPS12, RPL17, RPL37A, SEC61A1, MYO1C, ITGA3, RPL36, RPL39, RPS10, R…	1288	368	16130	2.9947	4.44592e-18	4.07967e-18
GOTERM_BP	GO:0044772~mitotic cell cycle phase transition	108	6.49039e-21	-20.1877	GTSE1, UBE2C, ANXA1, ODF2, CKS1B, CDK4, TACC3, NEK6, FANCI, MCM8, POLE, CDC6, MELK, GFI1, ORC6, PRIM1, PSMB8, CENPF, CCND1, WEE1, UBA52, MAD2L1, MCM5, CHEK2, RPA3, PSMA2, CEP152, MCM6, NDC80, GPNMB, CENPE, PSMB10, CCNB1, TTK, CCNB2, RAD51B, CHEK1, BIRC5, PLK2, CDCA5, RPA2, HMMR, BORA, ANLN, CKS2, DHFR, RRM2, POLE2, NEDD1, TERT, RCC2, CDC45, CDT1, POLA2, MCM2, KIF14, PTPN6, DBF4, RB1, PSMB1, NEK2,…	1288	514	16130	2.63135	4.44592e-18	4.07967e-18
GOTERM_BP	GO:0044770~cell cycle phase transition	111	2.92091e-20	-19.5345	GTSE1, UBE2C, ANXA1, ODF2, CKS1B, CDK4, TACC3, NEK6, FANCI, MCM8, POLE, CDC6, MELK, GFI1, ORC6, PRIM1, PSMB8, CENPF, CCND1, WEE1, UBA52, MAD2L1, MCM5, CHEK2, RPA3, PSMA2, CEP152, MCM6, NDC80, GPNMB, CENPE, PSMB10, CCNB1, TTK, CCNB2, RAD51B, CHEK1, BIRC5, PLK2, CDCA5, RPA2, HMMR, BORA, ANLN, CKS2, DHFR, RRM2, POLE2, NEDD1, TERT, FAM83D, RCC2, CDC45, CDT1, POLA2, MCM2, KIF14, PTPN6, DBF4, RB1, PSMB…	1288	547	16130	2.54129	1.75072e-17	1.6065e-17
GOTERM_BP	GO:0072657~protein localization to membrane	103	4.73675e-20	-19.3245	EHD2, FERMT2, FGF13, ANXA2, RPS8, RPS13, RPL13A, P2RY1, ERBB2, RPS16, ITGB2, NPC1, MAPK8, APOE, TRAM1, PACS1, RPS15, SSR3, RPL35, TRAM2, RPSA, UBA52, RPL19, KCNB2, RPS14, RPL21, RPS11, PDPK1, RPS3, RPL23A, RPL27, RPL17, SEC61A1, RPL36, RPL39, SH3PXD2B, RPL30, RPS2, RPL18, BCL2L11, RPL38, RPS19, TESC, RPL14, RAMP1, GOLGA7B, RPS5, RPL4, RPL10A, CIB1, RPL5, RPLP0, RPL10, SSR1, RPL18A, ROCK2, F11R, M…	1288	489	16130	2.63783	2.52364e-17	2.31575e-17
GOTERM_BP	GO:0006364~rRNA processing	71	1.71622e-19	-18.7654	TSR2, RPS8, RPS13, RPLP2, RPS7, RPL13A, RPS21, RPS9, RPS16, RPL34, RPL13, WDR3, RPL23, PNO1, RPS15, RPL35, FAU, RPSA, RPS28, RPL12, RPS6, UBA52, SNU13, RPS18, RPL19, RPL29, RPS14, RPL21, NSA2, RPS11, RPL35A, RPS3, RPL23A, RPL27, RPS12, RRP9, RPP25, RPL17, RPL37A, RPL36, RPL39, RPS10, RPL6, RPL30, RPS2, RPS23, RPL18, RPL38, RPS19, GAR1, RPL14, RPLP1, FBL, RPS4X, RPS25, NOP2, RPS5, RPL4, RPL10A, EI…	1288	269	16130	3.3054	8.22929e-17	7.55138e-17
GOTERM_BP	GO:0035556~intracellular signal transduction	331	6.90039e-19	-18.1611	F2R, RFC4, EXO1, PTPRJ, RAB27A, DISC1, FGF13, IKBKE, PLEK, LCP2, CANT1, ARHGEF9, ASB4, WNT7A, IL15RA, NEK6, STK36, CXCR4, RHOV, PRMT5, MELK, CLIC2, MCTP1, MAPK8, APOE, DUSP22, MAPKAPK3, PRKD3, GRIN2C, IFIH1, NET1, BTK, FASLG, ARHGAP22, PRKCD, CDC42EP5, CHEK2, AP006333.1, RPS3, PSMA2, DGKH, BATF, SELE, ANGPT1, HTR5A, LPAR1, IRAK4, RASGRF2, SIRT3, MYC, STAT4, AURKB, BARD1, BCL2L11, PTK6, NOD1, MAP4…	1288	2657	16130	1.56011	3.00794e-16	2.76016e-16
GOTERM_BP	GO:0007067~mitotic nuclear division	91	7.37334e-18	-17.1323	UBE2C, KIF14, SMC4, LZTS2, PRC1, RB1, NSL1, MIS12, TACC3, NEK2, NEK6, HELLS, MIS18A, KIF4A, PTTG1, CDC6, SPC25, KIF15, SMC2, CCNG1, ASPM, PDGFRB, KIFC1, DSCC1, CENPF, CENPS, BUB1, ERCC6L, WEE1, KIF11, RPS6, SEPTIN2, TPX2, DLGAP5, MAD2L1, SGO1, CHEK2, RPS3, KIF23, FBXO5, RCC1, NUSAP1, HAUS1, NDC80, CENPE, NCAPG2, CCNB1, SKA3, SMC5, TTK, CDK1, CCNB2, SNX33, AURKB, CDC20, CENPX, ARHGEF2, CDCA8, CENP…	1288	431	16130	2.64413	2.94626e-15	2.70356e-15
GOTERM_BP	GO:0000280~nuclear division	109	3.2976e-17	-16.4818	UBE2C, SMC4, LZTS2, EME1, PRC1, NSL1, MIS12, TACC3, NEK6, PRMT5, PTTG1, CDC6, KIF15, SMC2, KIFC1, CENPF, ERCC6L, WEE1, KIF11, SEPTIN2, TRIP13, MAD2L1, CHEK2, MND1, FANCD2, RPS3, RAD54B, TOP2A, NDC80, CENPE, CCNB1, SMC5, TTK, CCNB2, AURKB, CDCA8, RAD51B, BCL2L11, LRP5, CHEK1, BIRC5, SPC24, RACGAP1, MYBL2, ZWILCH, RPS6KA2, CDCA5, NCAPD2, NCAPD3, BORA, ANLN, RAD54L, CKS2, FANCA, NEDD1, FAM83D, RCC2,…	1288	583	16130	2.3414	1.21631e-14	1.11611e-14
GOTERM_BP	GO:0016477~cell migration	177	4.90261e-17	-16.3096	GTSE1, PRCP, F2R, HYAL2, PTPRJ, DISC1, ARPC5, FGF13, EGR3, ANXA1, WNT7A, TRPV4, SIX4, P2RY1, MMP9, CXCR4, RRAS, ITGB2, PROS1, GPR183, PSTPIP1, GPR18, FEZF2, KLF4, APOE, HMOX1, LAMB1, ITGAV, CHL1, HAS1, MDK, MMP14, NET1, VCAN, CSF3R, PIK3CB, CORO1A, SRPX2, PRKCD, LYN, B4GALT1, HMGB2, PDPK1, SELE, ANGPT1, LPAR1, IRAK4, HSPA5, KDR, GPNMB, EFHC1, CNN2, MYC, PTAFR, VCAM1, PARP9, ANXA3, HIF1A, DCLK1, H…	1288	1184	16130	1.87215	1.67914e-14	1.54082e-14
GOTERM_BP	GO:0006401~RNA catabolic process	63	3.10921e-16	-15.5073	RPS8, RPS13, RPLP2, RPS7, RPL13A, RPS21, RPS9, GTPBP1, RPS16, RPL34, RPL13, RPL23, RPS15, RPL35, FAU, RPSA, RPS28, RPL12, RPS6, UBA52, RPS18, RPL19, RPL29, RPS14, RPL21, RPS11, RPL35A, RPS3, RPL23A, RPL27, RNASEH2A, RPS12, EIF3E, RPL17, RPL37A, RPL36, RPL39, ZFP36L2, RPS10, RPL6, ZFP36L1, RPL30, RPS2, RPS23, RPL18, RPL38, RPS19, RPL14, RPLP1, RPS4X, RPS25, RPS5, RPL4, RPL10A, RPS3A, RPL7, RPL24, …	1288	249	16130	3.16854	9.93912e-14	9.12036e-14
GOTERM_BP	GO:0048513~animal organ development	366	3.64033e-16	-15.4389	CMTM7, DISC1, FGF13, ARPC5, RHO, EGR3, PLEK, SMAD5, CD276, SOX3, TFEB, CDK4, WNT7A, TACC3, INSIG1, IL15RA, STK36, FOXL2, POLE, ORAI1, PRMT5, MELK, ACP6, GNG5, MDK, GDPD5, MMP14, CSF3R, MFSD2A, BTK, MYH11, FASLG, LOX, RPL19, RPS14, B4GALT1, HMGB2, STIL, PSMA2, BATF, ANGPT1, HTR5A, LPAR1, HSPA5, TOP2A, ESCO2, HLX, BNC2, PCDH12, EFHC1, MYC, CCNB2, SH3PXD2B, BATF3, BCL2L11, DDR2, RPS19, NME1, TGFB2, …	1288	3129	16130	1.46485	1.09096e-13	1.00109e-13
GOTERM_BP	GO:1902582~single-organism intracellular transport	120	5.80079e-16	-15.2365	F2R, HYAL2, ANXA2, RPS8, RPS13, ECT2, RPL13A, INSIG1, STING1, ERBB2, RPS16, ABCA1, HMOX1, TRAM1, PACS1, RPS15, SSR3, RPL35, TRAM2, RPSA, BTK, UBA52, PRKCD, RPL19, LYN, KCNB2, RPS14, RPL21, RPS11, RPS3, RPL23A, RPL27, ANGPT1, TONSL, TAP1, RPL17, SEC61A1, RPL36, RPL39, HIF1A, RPL30, RPS2, RPL18, RPL38, RPS19, TESC, RPL14, TGFB2, GOLGA7B, PEX5L, PRKAG2, RPS5, RPL4, RPL10A, CIB1, MDFIC, RPL5, FGR, RP…	1288	695	16130	2.1623	1.63616e-13	1.50138e-13
GOTERM_BP	GO:0019058~viral life cycle	90	1.08854e-15	-14.9632	ROCK2, F11R, ISG15, HYAL2, RPS8, RPS13, TRIM62, RPLP2, RPS7, RPL13A, PPIB, RPS21, RPS9, KPNA2, CXCR4, RPS16, RPL34, NPC1, RPL13, REST, MVB12A, CTSB, RPL23, APOE, CD81, ITGAV, RPS15, RPL35, FAU, RPSA, RPS28, RPL12, ITGB5, RPS6, UBA52, RPS18, PRKN, RPL19, RPL29, P4HB, RPS14, RPL21, RPS11, EIF3F, RPL35A, RPS3, RPL23A, RPL27, PPIA, RPS12, TOP2A, TAP1, MRC1, NECTIN1, RPL17, RPL37A, RPL36, RPL39, PTX3,…	1288	455	16130	2.47713	2.89975e-13	2.66087e-13
GOTERM_BP	GO:0000082~G1/S transition of mitotic cell cycle	56	2.47593e-14	-13.6063	GTSE1, MCM2, DBF4, ANXA1, RB1, CDK4, MCM8, PRIM2, POLE, CDC6, GFI1, ORC6, PRIM1, MCM3, GADD45A, MCM4, CCND1, SKP2, POLA1, RPS6, UBA52, SOX4, MCM5, CHEK2, RPA3, CDKN1A, CDKN2C, FBXO5, RCC1, TYMS, NPM1, MCM6, GPNMB, CCNB1, CDK1, ORC1, E2F1, AURKA, TP53, PLK2, IQGAP3, PCNA, CDCA5, LATS2, RPA2, MCM10, DHFR, RPS27L, RRM2, POLE2, E2F7, TERT, MCM7, CDC45, CDT1, POLA2	1288	224	16130	3.13082	5.93604e-12	5.44705e-12
GOTERM_BP	GO:0000819~sister chromatid segregation	56	2.47593e-14	-13.6063	UBE2C, KIF14, SMC4, PRC1, RB1, NSL1, MIS12, TACC3, NEK2, NEK6, DDX11, KIF4A, CDC6, SPC25, SMC2, KIFC1, DSCC1, CENPF, CENPS, BUB1, ERCC6L, DLGAP5, MAD2L1, SGO1, CENPI, KIF23, NUSAP1, TOP2A, NDC80, CENPE, CCNB1, SMC5, TTK, AURKB, CDC20, CENPL, CDCA8, CENPN, KNTC1, BIRC5, SPC24, RACGAP1, DSN1, CENPH, ZWILCH, NCAPG, CDCA5, NCAPD2, ESPL1, NCAPD3, KNL1, CENPK, RCC2, MAPRE1, NCAPH, CEP55	1288	224	16130	3.13082	5.93604e-12	5.44705e-12
GOTERM_BP	GO:0034655~nucleobase-containing compound catabolic process	77	4.46198e-14	-13.3505	RPS8, RPS13, RPLP2, RPS7, GDA, RPL13A, RPS21, RPS9, GTPBP1, FOXL2, RPS16, RPL34, RPL13, RPL23, DCTPP1, ADPRM, RPS15, RPL35, FAU, RPSA, RPS28, RPL12, PNP, RPS6, UBA52, RPS18, CASP3, RPL19, RPL29, RACK1, RPS14, RPL21, RPS11, HMGB2, RPL35A, RPS3, RPL23A, RPL27, DNASE2, RNASEH2A, RPS12, CNP, EIF3E, RPL17, RPL37A, RPL36, RPL39, ZFP36L2, RPS10, RPL6, ZFP36L1, RPL30, RPS2, RPS23, RPL18, RPL38, RPS19, RP…	1288	380	16130	2.53761	1.01882e-11	9.3489e-12
GOTERM_BP	GO:0033365~protein localization to organelle	138	6.58247e-14	-13.1816	GTSE1, F2R, HYAL2, DISC1, RPS8, RPS13, LZTS2, ECT2, MIS12, RPL13A, SIX4, STING1, RPS16, DDIT3, MAPK8, CD81, PACS1, RPS15, SSR3, RPL35, GPR26, OBSCN, TRAM2, RPSA, UBA52, PRKCD, RPL19, RPS14, RPL21, RPS11, STIL, RPS3, RPL23A, RPL27, ANGPT1, TONSL, HSPA5, CNTLN, ESCO2, NGFR, TTK, RPL17, SEC61A1, AURKB, RPL36, SEC61G, RPL39, DCLK1, RPL30, RPS2, RPL18, BCL2L11, RPL38, RPS19, RPL14, TGFB2, RAC2, PEX5L,…	1288	902	16130	1.91598	1.43468e-11	1.31649e-11
GOTERM_BP	GO:0009966~regulation of signal transduction	319	7.42074e-14	-13.1296	PRCP, F2R, RFC4, EXO1, PTPRJ, DISC1, RHO, IKBKE, PLEK, CANT1, ARHGEF9, WNT7A, NEK6, STK36, CXCR4, RHOV, PRMT5, CLIC2, MAPK8, APOE, DUSP22, MAPKAPK3, GDPD5, MMP14, NET1, FASLG, ARHGAP22, PRKCD, TRAIP, HMGB2, CHEK2, AP006333.1, RPS3, PSMA2, ANGPT1, LPAR1, BDNF, IRAK4, RASGRF2, HSPA5, SIRT3, MYC, AURKB, BARD1, G0S2, BCL2L11, PTK6, SH3BP2, BIRC5, NOD1, MAP4K5, TGFB2, FBN2, ADRB1, RAC2, PEX5L, VANGL2,…	1288	2728	16130	1.46442	1.54706e-11	1.41962e-11
GOTERM_BP	GO:0016310~phosphorylation	271	1.35e-13	-12.8697	F2R, PTPRJ, FGF13, RHO, IKBKE, LCP2, SMAD5, CDK4, WNT7A, CDK15, SLC25A23, NEK6, KHK, STK36, CXCR4, PRMT5, CDC6, MELK, MAPK8, APOE, NMRK2, DUSP22, MAPKAPK3, PRKD3, GRIN2C, EHD4, BTK, PRKCD, CDC42EP5, CHEK2, AP006333.1, RPS3, PSMA2, DGKH, ANGPT1, LPAR1, IRAK4, RASGRF2, HSPA5, PAK6, SIRT3, TWF1, DTYMK, MYC, AURKB, HCK, DDR2, PTK6, BIRC5, NOD1, NME1, MAP4K5, TGFB2, PLVAP, ENO3, RPS6KA2, RAC2, PKN2, V…	1288	2229	16130	1.52257	2.69718e-11	2.47499e-11
GOTERM_BP	GO:0023014~signal transduction by protein phosphorylation	133	3.91683e-13	-12.4071	F2R, HYAL2, PTPRJ, FGF13, WNT7A, ADRA1A, TRPV4, SPRY1, P2RY1, CXCR4, ERBB2, RRAS, GPR183, NOD2, PRMT5, KLF4, MAPK8, APOE, DUSP22, MAPKAPK3, GRIN2C, PSMB8, ITGAV, CD81, PIK3CB, RASGRF1, UBA52, PRKCD, LYN, CDC42EP5, RAP1B, RPS3, PSMA2, ANGPT1, LPAR1, NPTN, IRAK4, RASGRF2, KDR, NGFR, GPNMB, PSMB10, PAK6, SIRT3, MYC, STK25, NOD1, MAP4K5, TGFB2, PLVAP, VANGL2, MYD88, CCN1, KCNH4, CIB1, MDFIC, FAM83D, …	1288	877	16130	1.8992	7.51249e-11	6.89363e-11
GOTERM_BP	GO:0006260~DNA replication	63	4.82575e-13	-12.3164	EXO1, RFC4, POLN, PARP2, MCM2, MMS22L, GLI2, DBF4, EME1, POLD1, RRM1, GINS3, MCM8, PRIM2, POLE, SSRP1, DDX11, DTL, CDC6, ORC6, PRIM1, MCM3, BRCA2, E2F8, DSCC1, MCM4, CENPS, RAD51, POLA1, PRIMPOL, MCM5, CHEK2, RPA3, TONSL, RFC2, RNASEH2A, TOP2A, NPM1, MCM6, POLD2, BAZ1A, CDK1, CENPX, BARD1, ORC1, CHEK1, GINS4, RECQL4, PCNA, RPA2, GINS2, MCM10, RRM2, POLE2, CHAF1A, E2F7, MCM7, GINS1, CDC45, MGME1, …	1288	290	16130	2.72058	8.8998e-11	8.16665e-11
GOTERM_BP	GO:0006605~protein targeting	113	5.58019e-13	-12.2534	F2R, HYAL2, RAB27A, KIF13B, ANXA2, RPS8, RPS13, ECT2, RPL13A, STING1, ERBB2, RPS16, TRAM1, PACS1, RPS15, SSR3, RPL35, GPR26, TRAM2, RPSA, UBA52, PRKCD, RPL19, KCNB2, RPS14, RPL21, RPS11, RPS3, RPL23A, RPL27, ANGPT1, TONSL, RPL17, SEC61A1, RPL36, SEC61G, RPL39, RPL30, RPS2, RPL18, RPL38, RPS19, TESC, RPL14, TGFB2, GOLGA7B, RAC2, PEX5L, RPS5, RPL4, RPL10A, CIB1, MDFIC, RPL5, RPLP0, RPL10, SSR1, POL…	1288	701	16130	2.01873	9.91e-11	9.09364e-11
GOTERM_BP	GO:1902531~regulation of intracellular signal transduction	218	8.60449e-13	-12.0653	F2R, RFC4, EXO1, PTPRJ, IKBKE, PLEK, CANT1, ARHGEF9, WNT7A, NEK6, CXCR4, RHOV, PRMT5, CLIC2, APOE, DUSP22, MAPKAPK3, NET1, FASLG, ARHGAP22, PRKCD, CHEK2, AP006333.1, RPS3, ANGPT1, LPAR1, IRAK4, RASGRF2, SIRT3, MYC, AURKB, BARD1, BCL2L11, PTK6, NOD1, MAP4K5, TGFB2, ADRB1, RAC2, PEX5L, VANGL2, CMKLR1, FADD, GSDME, NCK1, CCN1, CIB1, FAM83D, FGR, CXCR3, IQGAP1, HSPB1, HPSE, KIF14, PTPN6, DVL2, ARHGAP…	1288	1714	16130	1.59281	1.47352e-10	1.35213e-10
GOTERM_BP	GO:0098813~nuclear chromosome segregation	62	9.79633e-13	-12.0089	UBE2C, KIF14, SMC4, EME1, PRC1, RB1, NSL1, MIS12, TACC3, NEK2, NEK6, DDX11, KIF4A, PTTG1, CDC6, SPC25, SMC2, KIFC1, DSCC1, CENPF, CENPS, BUB1, ERCC6L, TRIP13, DLGAP5, MAD2L1, SGO1, FANCD2, CENPI, KIF23, NUSAP1, TOP2A, NDC80, CENPE, CCNB1, SMC5, TTK, AURKB, CDC20, CENPX, CENPL, CDCA8, CENPN, KNTC1, BIRC5, SPC24, RACGAP1, DSN1, CENPH, ZWILCH, NCAPG, CDCA5, NCAPD2, ESPL1, NCAPD3, KNL1, FAM83D, CENPK…	1288	287	16130	2.70538	1.61977e-10	1.48634e-10
GOTERM_BP	GO:0019220~regulation of phosphate metabolic process	207	1.35236e-12	-11.8689	F2R, PTPRJ, FGF13, PLEK, LCP2, CDK4, WNT7A, MRAP2, SLC25A23, CXCR4, PRMT5, CDC6, APOE, DUSP22, MAPKAPK3, EHD4, PRKCD, CHEK2, AP006333.1, RPS3, ANGPT1, LPAR1, HSPA5, SIRT3, TWF1, GRM8, MYC, BARD1, DDR2, PTK6, NOD1, MAP4K5, TGFB2, ADRB1, RAC2, VANGL2, NCK1, CCN1, CIB1, FAM83D, FGR, CXCR3, IQGAP1, HSPB1, ROCK2, RXFP2, KIF14, PTPN6, INSM1, RB1, DVL2, ACVRL1, STAT3, ID1, GLIPR2, DUSP19, ADAM9, SFRP1, …	1288	1610	16130	1.61014	2.16153e-10	1.98347e-10
GOTERM_BP	GO:0048534~hematopoietic or lymphoid organ development	120	2.11429e-12	-11.6748	MFNG, ISG15, CMTM7, HYAL2, ANXA2, EGR3, PLEK, SMAD5, ANXA1, CBFB, CLCF1, IL15RA, SIX4, MMP9, ERBB2, RRAS, GPR183, GPR18, MELK, GFI1, KLF4, P4HTM, ACP6, RUNX3, MMP14, CSF3R, BTK, LYN, RPS14, HMGB2, FANCD2, PTPRZ1, BATF, ANGPT1, KDR, TOP2A, ESCO2, HLX, CCR9, CNN2, MYC, CCNB2, VCAM1, HIF1A, IRF1, BATF3, BCL2L11, LRP5, RPS19, TESC, NME1, TGFB2, TMEM178A, SPI1, C1QC, FADD, ANLN, CIB1, FANCA, NFE2L1, S…	1288	778	16130	1.93161	3.27034e-10	3.00093e-10
GOTERM_BP	GO:0072359~circulatory system development	138	2.3345e-12	-11.6318	PRCP, ANP32B, ANXA2, EGR3, COL4A2, ASB4, WNT7A, ADRA1A, ADM, ERBB2, RRAS, ITGB2, KLF4, DDIT3, APOE, HMOX1, E2F8, GNG5, ITGAV, XIRP2, MMP14, MYH11, FASLG, PIK3CB, LOX, ARHGAP22, SRPX2, B4GALT1, STIL, DIPK2A, ANGPT1, KDR, NGFR, GPNMB, CCNB1, SGCD, SH3PXD2B, CYBB, ANXA3, HIF1A, LRP5, ITGB3, STAB1, TGFB2, RAMP1, RPS6KA2, MICAL2, VANGL2, SPI1, FREM2, PGF, RYR1, SPARC, CCN1, PRRX1, YAP1, CIB1, TERT, ED…	1288	945	16130	1.8288	3.3921e-10	3.11267e-10
GOTERM_BP	GO:0072358~cardiovascular system development	138	2.3345e-12	-11.6318	PRCP, ANP32B, ANXA2, EGR3, COL4A2, ASB4, WNT7A, ADRA1A, ADM, ERBB2, RRAS, ITGB2, KLF4, DDIT3, APOE, HMOX1, E2F8, GNG5, ITGAV, XIRP2, MMP14, MYH11, FASLG, PIK3CB, LOX, ARHGAP22, SRPX2, B4GALT1, STIL, DIPK2A, ANGPT1, KDR, NGFR, GPNMB, CCNB1, SGCD, SH3PXD2B, CYBB, ANXA3, HIF1A, LRP5, ITGB3, STAB1, TGFB2, RAMP1, RPS6KA2, MICAL2, VANGL2, SPI1, FREM2, PGF, RYR1, SPARC, CCN1, PRRX1, YAP1, CIB1, TERT, ED…	1288	945	16130	1.8288	3.3921e-10	3.11267e-10
GOTERM_BP	GO:0072594~establishment of protein localization to organelle	107	3.1106e-12	-11.5072	F2R, HYAL2, RPS8, RPS13, ECT2, RPL13A, STING1, RPS16, DDIT3, MAPK8, PACS1, RPS15, SSR3, RPL35, GPR26, RPSA, UBA52, PRKCD, RPL19, RPS14, RPL21, RPS11, RPS3, RPL23A, RPL27, ANGPT1, TONSL, RPL17, SEC61A1, RPL36, SEC61G, RPL39, RPL30, RPS2, RPL18, BCL2L11, RPL38, RPS19, RPL14, TGFB2, RAC2, PEX5L, RPS5, RPL4, RPL10A, MDFIC, TERT, RPL5, RPLP0, RPL10, POLA2, DACT3, RPL18A, SMAD3, SEC61B, RPLP2, RPS7, RP…	1288	666	16130	2.012	4.38687e-10	4.02549e-10
GOTERM_BP	GO:0043043~peptide biosynthetic process	107	3.40144e-12	-11.4683	RPS8, RPS13, TRNAU1AP, IGF2BP2, NIBAN1, CDK4, RPL13A, SLC25A23, GTPBP1, ERBB2, RPS16, EEF1G, EIF3H, RPS15, KARS1, CNDP2, RPL35, RPSA, UBA52, RPL19, RPS14, RPL21, RPS11, UCP1, RPS3, RPL23A, RPL27, CPEB1, RPL17, RPL36, PTAFR, RPL39, RPL30, RPS2, RPL18, RPL38, RPS19, RPL14, GAPDH, RPS5, RPL4, RPL10A, NCK1, SERP1, MGST2, RPL5, RPLP0, RPL10, HSPB1, RPL18A, WT1, SLC25A43, SMAD3, EEF1B2, DIO2, RPLP2, RP…	1288	667	16130	2.00898	4.65998e-10	4.2761e-10
GOTERM_BP	GO:0006412~translation	104	3.56377e-12	-11.4481	RPS8, RPS13, TRNAU1AP, IGF2BP2, NIBAN1, CDK4, RPL13A, SLC25A23, GTPBP1, ERBB2, RPS16, EEF1G, EIF3H, RPS15, KARS1, RPL35, RPSA, UBA52, RPL19, RPS14, RPL21, RPS11, UCP1, RPS3, RPL23A, RPL27, CPEB1, RPL17, RPL36, PTAFR, RPL39, RPL30, RPS2, RPL18, RPL38, RPS19, RPL14, GAPDH, RPS5, RPL4, RPL10A, NCK1, SERP1, RPL5, RPLP0, RPL10, HSPB1, RPL18A, WT1, SLC25A43, SMAD3, EEF1B2, DIO2, RPLP2, RPS7, SLC25A20, …	1288	641	16130	2.03186	4.6951e-10	4.30833e-10
GOTERM_BP	GO:0030097~hemopoiesis	115	3.62292e-12	-11.4409	MFNG, ISG15, CMTM7, HYAL2, ANXA2, EGR3, PLEK, SMAD5, ANXA1, CBFB, CLCF1, IL15RA, MMP9, ERBB2, RRAS, GPR183, GPR18, MELK, GFI1, KLF4, P4HTM, ACP6, RUNX3, MMP14, CSF3R, BTK, LYN, RPS14, HMGB2, FANCD2, PTPRZ1, BATF, ANGPT1, KDR, TOP2A, ESCO2, HLX, CCR9, CNN2, MYC, VCAM1, HIF1A, IRF1, BATF3, RPS19, TESC, NME1, TGFB2, TMEM178A, SPI1, C1QC, FADD, ANLN, CIB1, FANCA, NFE2L1, SASH3, CD4, IRF7, ETS1, PTPN6…	1288	739	16130	1.94882	4.6951e-10	4.30833e-10
GOTERM_BP	GO:0007346~regulation of mitotic cell cycle	86	5.86625e-12	-11.2316	GTSE1, UBE2C, SMAD3, KIF14, PTPN6, ANXA1, EME1, CKS1B, RB1, CDK4, PSMB1, TACC3, NEK2, NEK6, FANCI, PRMT5, CDC6, BRCA2, GADD45A, PDGFRB, PSMB8, CENPF, BUB1, CCND1, KIF11, RPS6, UBA52, TPX2, DLGAP5, MAD2L1, SOX4, CHEK2, RPA3, CDKN1A, PSMA2, PSME1, FBXO5, RCC1, NUSAP1, TOP2A, NPM1, NDC80, GPNMB, CENPE, PSMB10, CCNB1, SMC5, TTK, CDK1, MYC, PSMB9, CDC20, ZFP36L2, RAD51B, USP2, ZFP36L1, PSMB3, LRP5, E2…	1288	491	16130	2.19349	7.40229e-10	6.79251e-10
GOTERM_BP	GO:0002520~immune system development	123	7.92088e-12	-11.1012	EXO1, MFNG, ISG15, CMTM7, HYAL2, ANXA2, EGR3, PLEK, SMAD5, ANXA1, CBFB, CLCF1, IL15RA, SIX4, MMP9, ERBB2, RRAS, GPR183, GPR18, MELK, GFI1, KLF4, P4HTM, ACP6, RUNX3, MMP14, CSF3R, BTK, LYN, RPS14, HMGB2, FANCD2, PTPRZ1, BATF, ANGPT1, KDR, TOP2A, ESCO2, HLX, CCR9, CNN2, MYC, CCNB2, VCAM1, HIF1A, IRF1, BATF3, BCL2L11, LRP5, RPS19, TESC, NME1, TGFB2, TMEM178A, SPI1, C1QC, FADD, ANLN, CIB1, FANCA, NFE…	1288	821	16130	1.87621	9.73862e-10	8.93638e-10
GOTERM_BP	GO:0000165~MAPK cascade	125	9.02156e-12	-11.0447	F2R, HYAL2, PTPRJ, FGF13, WNT7A, ADRA1A, TRPV4, SPRY1, P2RY1, CXCR4, ERBB2, RRAS, GPR183, NOD2, PRMT5, KLF4, MAPK8, APOE, DUSP22, MAPKAPK3, GRIN2C, PSMB8, ITGAV, CD81, PIK3CB, RASGRF1, UBA52, PRKCD, LYN, CDC42EP5, RAP1B, RPS3, PSMA2, ANGPT1, LPAR1, NPTN, IRAK4, RASGRF2, KDR, NGFR, GPNMB, PSMB10, SIRT3, MYC, STK25, NOD1, MAP4K5, TGFB2, PLVAP, VANGL2, MYD88, CCN1, CIB1, MDFIC, FAM83D, C1QL4, IQGAP1…	1288	841	16130	1.86137	1.08146e-09	9.92371e-10
GOTERM_BP	GO:0006270~DNA replication initiation	19	1.87231e-11	-10.7276	ORC6, MCM3, PRIM1, MCM2, MCM6, GINS2, MCM4, MCM10, POLA1, ORC1, POLE2, PRIM2, MCM7, POLE, CDC45, MCM5, GINS4, CDC6, POLA2	1288	35	16130	6.79836	2.18969e-09	2.00931e-09
GOTERM_BP	GO:0044265~cellular macromolecule catabolic process	138	2.46397e-11	-10.6084	GTSE1, UBE2C, ISG15, DISC1, ANXA2, RPS8, RPS13, ADAMTS7, CTSA, PCYOX1, ASB2, RPL13A, GTPBP1, FOXL2, RPS16, UHRF1, PTTG1, DTL, MVB12A, CTSB, DDIT3, APOE, PSMB8, USP43, CD81, RPS15, RPL35, RPSA, UBA52, ATP13A2, RPL19, MAD2L1, CLPP, RPS14, KCTD5, RPL21, RPS11, HMGB2, CHEK2, RPS3, PSMA2, RPL23A, RPL27, HSPA5, PSMB10, CCNB1, RPL17, AURKB, RPL36, RPL39, USP2, RPL30, RPS2, RPL18, RPL38, RPS19, BTBD6, TC…	1288	976	16130	1.77071	2.81303e-09	2.5813e-09
GOTERM_BP	GO:0006259~DNA metabolic process	139	4.86213e-11	-10.3132	RFC4, EXO1, ISG15, ANXA1, FANCC, EME1, CLCF1, POLD1, RRM1, FOXL2, FANCI, MCM8, UHRF1, POLE, PRMT5, PTTG1, DTL, NEIL3, CDC6, KLF4, ORC6, PRIM1, E2F8, USP43, CENPF, EEPD1, UBA52, TRIP13, PRKCD, MCM5, HMGB2, CHEK2, MND1, FANCD2, RPA3, BATF, RPS3, FIGNL1, RAD54B, TONSL, TOP2A, MCM6, ESCO2, POLD2, SMC5, MYC, AURKB, PARP9, ANXA3, BARD1, RAD51B, CHEK1, TK1, GINS4, NME1, RECQL4, PFN1, CDCA5, SPI1, PSMC3I…	1288	995	16130	1.74949	5.42184e-09	4.9752e-09
GOTERM_BP	GO:0006915~apoptotic process	214	5.62547e-11	-10.2498	F2R, DAD1, EGR3, IKBKE, ARHGEF9, CDK4, WNT7A, NEK6, FOXL2, CXCR4, MELK, MAPK8, APOE, DUSP22, CHL1, MDK, NET1, BTK, NGB, FASLG, CORO1A, PRKCD, MAD2L1, TRAIP, B4GALT1, HMGB2, STIL, CHEK2, RPS3, ANGPT1, LPAR1, BDNF, RASGRF2, HSPA5, TOP2A, PAK6, MYC, AURKB, ANXA5, BARD1, G0S2, HCK, BCL2L11, BIRC5, NOD1, TGFB2, RPS6KA2, PKN2, SPI1, FADD, DNASE2B, GSDME, NCK1, ASCL1, DHCR24, CCN1, APAF1, CIB1, TERT, CX…	1288	1747	16130	1.53405	6.13048e-09	5.62547e-09
GOTERM_BP	GO:0006518~peptide metabolic process	120	5.89545e-11	-10.2295	RNPEP, RPS8, RPS13, TRNAU1AP, IGF2BP2, NIBAN1, CDK4, RPL13A, SLC25A23, GTPBP1, ERBB2, RPS16, PROS1, EEF1G, EIF3H, CLIC2, APOE, RPS15, KARS1, CNDP2, RPL35, RPSA, UBA52, RPL19, CPXM1, RPS14, RPL21, RPS11, UCP1, RPS3, RPL23A, RPL27, CPEB1, RPL17, RPL36, PTAFR, RPL39, RPL30, RPS2, RPL18, RPL38, RPS19, RPL14, CTSZ, GAPDH, RPS5, RPL4, RPL10A, NCK1, SERP1, MGST2, RPL5, ANPEP, RPLP0, RPL10, HSPB1, RPL18A…	1288	818	16130	1.83716	6.28193e-09	5.76444e-09
GOTERM_BP	GO:2000145~regulation of cell motility	111	6.43912e-11	-10.1912	GTSE1, PRCP, F2R, HYAL2, PTPRJ, ANXA1, LAMA2, WNT7A, TRPV4, LDB2, MMP9, CXCR4, ERBB2, RRAS, GPR183, GPR18, KLF4, APOE, HMOX1, WAS, LAMB1, ITGAV, CD81, HAS1, MMP14, CORO1A, SRPX2, LYN, PDPK1, ANGPT1, LPAR1, HSPA5, KDR, GPNMB, CNN2, MYC, PTAFR, ANXA3, HIF1A, DDR2, ITGB3, TGFB2, PLVAP, PFN1, PKN2, RAC2, FERMT3, CMKLR1, FADD, PGF, SPARC, NCK1, MYD88, CCN1, CIB1, TERT, SLC8A1, FGR, CXCR3, RCC2, TNFAIP…	1288	736	16130	1.8887	6.71208e-09	6.15916e-09
GOTERM_BP	GO:0001944~vasculature development	97	6.59386e-11	-10.1809	PRCP, ANP32B, ANXA2, EGR3, COL4A2, ASB4, WNT7A, ADM, ERBB2, RRAS, ITGB2, KLF4, DDIT3, APOE, HMOX1, E2F8, ITGAV, MMP14, FASLG, PIK3CB, LOX, ARHGAP22, SRPX2, B4GALT1, ANGPT1, KDR, NGFR, GPNMB, CYBB, ANXA3, HIF1A, LRP5, ITGB3, STAB1, TGFB2, RAMP1, SPI1, PGF, SPARC, CCN1, PRRX1, YAP1, CIB1, TERT, EDNRA, ANPEP, CXCR3, GNA13, HSPB1, ROCK2, WT1, MYDGF, ETS1, HPSE, COL1A1, COL5A1, TGFBI, PLCD1, C3AR1, AC…	1288	610	16130	1.99141	6.72714e-09	6.17297e-09
GOTERM_BP	GO:0001525~angiogenesis	74	7.06896e-11	-10.1506	PRCP, ROCK2, MYDGF, ETS1, HPSE, EGR3, ANXA2, COL4A2, TGFBI, PLCD1, C3AR1, WNT7A, ACVRL1, ADM, NFE2L2, COL4A1, ID1, RRAS, ITGB2, MMP2, KLF4, HMOX1, E2F8, PDGFRB, ELK3, ITGAV, PECAM1, MMP14, PIK3CB, WASF2, FASLG, FMNL3, PTK2, ARHGAP22, SRPX2, RSPO3, ERAP1, B4GALT1, GPR4, PIK3CG, ANGPT1, KDR, NGFR, LOXL2, FN1, CALCRL, CYBB, ANXA3, PTK2B, HIF1A, LRP5, ITGB3, STAB1, TGFB2, RAMP1, THY1, SPI1, EPHB4, PG…	1288	413	16130	2.24388	7.0616e-09	6.47988e-09
GOTERM_BP	GO:0030334~regulation of cell migration	105	8.69575e-11	-10.0607	GTSE1, PRCP, F2R, HYAL2, PTPRJ, ANXA1, LAMA2, WNT7A, TRPV4, LDB2, MMP9, CXCR4, RRAS, GPR183, GPR18, KLF4, APOE, HMOX1, LAMB1, ITGAV, HAS1, MMP14, CORO1A, SRPX2, LYN, PDPK1, ANGPT1, LPAR1, HSPA5, KDR, GPNMB, CNN2, MYC, PTAFR, ANXA3, HIF1A, DDR2, ITGB3, TGFB2, PLVAP, PFN1, RAC2, FERMT3, CMKLR1, FADD, PGF, SPARC, NCK1, MYD88, CCN1, CIB1, TERT, SLC8A1, FGR, CXCR3, RCC2, TNFAIP6, GNA13, RREB1, IQGAP1,…	1288	685	16130	1.91963	8.50941e-09	7.80843e-09
GOTERM_BP	GO:0031399~regulation of protein modification process	205	9.43923e-11	-10.0251	F2R, PTPRJ, DISC1, FGF13, LCP2, CDK4, WNT7A, PHF19, CXCR4, PRMT5, CDC6, MAPK8, APOE, DUSP22, MAPKAPK3, EHD4, PRKCD, MAD2L1, CHEK2, AP006333.1, RPS3, PSMA2, ANGPT1, LPAR1, HSPA5, SIRT3, TWF1, MYC, DDR2, PTK6, NOD1, MAP4K5, TGFB2, RAC2, VANGL2, SPI1, NCK1, CCN1, CIB1, FAM83D, FGR, IQGAP1, HSPB1, ROCK2, KIF14, PTPN6, INSM1, RB1, DVL2, ACVRL1, PPIB, MYB, STAT3, ID1, GLIPR2, DUSP19, ADAM9, SFRP1, MAP3…	1288	1664	16130	1.54283	9.05223e-09	8.30653e-09
GOTERM_BP	GO:0043604~amide biosynthetic process	110	1.37671e-10	-9.86116	RPS8, RPS13, TRNAU1AP, IGF2BP2, NIBAN1, CDK4, RPL13A, SLC25A23, GTPBP1, ERBB2, RPS16, EEF1G, EIF3H, GAL3ST1, RPS15, KARS1, CNDP2, RPL35, RPSA, UBA52, PRKCD, RPL19, RPS14, RPL21, RPS11, UCP1, RPS3, RPL23A, RPL27, CPEB1, RPL17, RPL36, PTAFR, RPL39, RPL30, RPS2, RPL18, RPL38, RPS19, RPL14, GAPDH, RPS5, RPL4, RPL10A, NCK1, CCN1, SERP1, MGST2, RPL5, RPLP0, RPL10, HSPB1, RPL18A, WT1, SLC25A43, SMAD3, E…	1288	736	16130	1.87169	1.29438e-08	1.18775e-08
GOTERM_BP	GO:0051246~regulation of protein metabolic process	284	1.50545e-10	-9.82233	F2R, PTPRJ, DISC1, FGF13, LCP2, CD276, IGF2BP2, CDK4, WNT7A, PHF19, RPL13A, FOXL2, CXCR4, UHRF1, PROS1, PRMT5, CDC6, EIF3H, MAPK8, APOE, DUSP22, MAPKAPK3, GRIN2C, EHD4, TFPI, MMP14, SERPINB8, SUSD4, FASLG, PRKCD, MAD2L1, RPS14, CHEK2, AP006333.1, RPS3, PSMA2, ANGPT1, LPAR1, CPEB1, HSPA5, SIRT3, TWF1, MYC, BARD1, BCL2L11, DDR2, PTK6, BIRC5, BTBD6, NOD1, MAP4K5, TGFB2, PTPN3, RPS6KA2, RAC2, VANGL2,…	1288	2512	16130	1.41585	1.3882e-08	1.27384e-08
GOTERM_BP	GO:0001568~blood vessel development	92	1.72827e-10	-9.76239	PRCP, ROCK2, WT1, MYDGF, ETS1, HPSE, COL1A1, COL5A1, EGR3, ANXA2, COL4A2, TGFBI, PLCD1, C3AR1, ASB4, WNT7A, ACVRL1, ADM, NFE2L2, WNT7B, COL4A1, ID1, RRAS, ITGB2, MMP2, KLF4, DDIT3, APOE, HMOX1, E2F8, PDGFRB, ELK3, ITGAV, PECAM1, MMP14, PIK3CB, WASF2, FASLG, FMNL3, LOX, PTK2, ARHGAP22, SRPX2, RSPO3, ERAP1, SMO, SOX4, B4GALT1, GPR4, PIK3CG, ANGPT1, KDR, NGFR, LOXL2, FN1, CALCRL, CYBB, ANXA3, RASA1,…	1288	576	16130	2.00025	1.56359e-08	1.43479e-08
GOTERM_BP	GO:0043549~regulation of kinase activity	115	2.19576e-10	-9.65841	F2R, UBE2C, HYAL2, PTPRJ, FGF13, LCP2, ECT2, CKS1B, CDK4, SPRY1, LDB2, CXCR4, ERBB2, NOD2, CDC6, KLF4, APOE, DUSP22, MAPKAPK3, CD81, ADCY2, CCND1, PIK3CB, UBA52, PRKCD, LYN, AP006333.1, PDPK1, RPS3, ANGPT1, LPAR1, HSPA5, CENPE, DDR2, LRP5, PTK6, ITGB3, TESC, NOD1, SOCS1, MAP4K5, TGFB2, RAC2, VANGL2, MIDN, PRKAG2, NCK1, CCN1, CKS2, CIB1, MDFIC, FGR, LRTM1, CD4, IQGAP1, HSPB1, TRIB2, KIF14, PTPN6, …	1288	788	16130	1.82764	1.94976e-08	1.78914e-08
GOTERM_BP	GO:0000070~mitotic sister chromatid segregation	37	2.84992e-10	-9.54517	KIF23, UBE2C, NUSAP1, KIF14, NDC80, SMC4, CENPE, CCNB1, SMC5, TTK, PRC1, RB1, AURKB, NSL1, MIS12, TACC3, NEK2, CDCA8, NEK6, RACGAP1, KIF4A, DSN1, CDC6, SMC2, NCAPG, CDCA5, ESPL1, KIFC1, NCAPD2, DSCC1, CENPF, NCAPD3, BUB1, DLGAP5, NCAPH, MAD2L1, CEP55	1288	142	16130	3.26311	2.48462e-08	2.27994e-08
GOTERM_BP	GO:0022616~DNA strand elongation	17	4.34097e-10	-9.36241	RFC4, PCNA, PRIM1, PARP2, RNASEH2A, POLD2, GINS2, POLD1, POLA1, TERT, GINS3, PRIM2, GINS1, POLE, GINS4, POLA2, LIG1	1288	32	16130	6.653	3.65263e-08	3.35174e-08
GOTERM_BP	GO:0010564~regulation of cell cycle process	93	4.34202e-10	-9.36231	GTSE1, ROCK2, UBE2C, KIF14, PTPN6, ANXA1, ECT2, INSM1, RB1, CDK4, WDR76, PSMB1, TACC3, NEK2, NEK6, TCIM, FANCI, DDX11, PRMT5, CDC6, SFRP1, BRCA2, GADD45A, E2F8, PDGFRB, PSMB8, CENPF, SOX11, SH3GLB1, BUB1, CCND1, KIF11, UBA52, TPX2, DLGAP5, MAD2L1, SOX4, CHEK2, STIL, PLK4, CDKN1A, PSMA2, PSME1, KIF23, FBXO5, RCC1, NUSAP1, BIN1, NPM1, NDC80, GPNMB, CENPE, PSMB10, CCNB1, SMC5, TTK, CDK1, AURKB, PSMB…	1288	595	16130	1.95742	3.65263e-08	3.35174e-08
GOTERM_BP	GO:0032268~regulation of cellular protein metabolic process	266	5.17934e-10	-9.28573	F2R, PTPRJ, DISC1, FGF13, LCP2, IGF2BP2, CDK4, WNT7A, PHF19, RPL13A, FOXL2, CXCR4, UHRF1, PROS1, PRMT5, CDC6, EIF3H, MAPK8, APOE, DUSP22, MAPKAPK3, EHD4, TFPI, MMP14, SERPINB8, SUSD4, FASLG, PRKCD, MAD2L1, RPS14, CHEK2, AP006333.1, RPS3, PSMA2, ANGPT1, LPAR1, CPEB1, HSPA5, SIRT3, TWF1, MYC, BCL2L11, DDR2, PTK6, BIRC5, NOD1, MAP4K5, TGFB2, PTPN3, RAC2, VANGL2, SPI1, FADD, NCK1, DHCR24, CCN1, SERP1…	1288	2346	16130	1.41995	4.28189e-08	3.92916e-08
GOTERM_BP	GO:0009967~positive regulation of signal transduction	178	8.76445e-10	-9.05728	F2R, MFNG, HYAL2, PTPRJ, DISC1, IKBKE, ECT2, TRIM62, CANT1, CLCF1, WNT7A, ADRA1A, TRPV4, SRPX, NEK6, P2RY1, MMP9, STK36, CXCR4, ERBB2, PTGIR, GPR183, NOD2, PRMT5, CPNE1, GPR18, GFI1, DDIT3, MAPK8, HMOX1, DUSP22, MAPKAPK3, PSMB8, CD81, FASLG, PIK3CB, RASGRF1, UBA52, PRKCD, LYN, RAP1B, RPS3, PSMA2, ANGPT1, LPAR1, NPTN, BDNF, IRAK4, KDR, NGFR, GPNMB, PSMB10, TTK, STK25, G0S2, HIF1A, BCL2L11, PTK6, S…	1288	1428	16130	1.56103	7.12297e-08	6.5362e-08
GOTERM_BP	GO:0045937~positive regulation of phosphate metabolic process	140	9.70071e-10	-9.0132	F2R, FGF13, ANXA2, LCP2, PLEK, ECT2, NIBAN1, CKS1B, CLCF1, WNT7A, ADRA1A, TRPV4, MRAP2, ADM, P2RY1, MMP9, CXCR4, ERBB2, PTGIR, GPR183, NOD2, CDC6, ABCA1, APOE, DUSP22, MAPKAPK3, EHD4, CD81, ADCY2, CCND1, PIK3CB, UBA52, PRKCD, LYN, CHEK2, RAP1B, PDPK1, RPS3, ANGPT1, LPAR1, NPTN, HSPA5, KDR, NGFR, GPNMB, CENPE, CCNB1, TTK, MYC, PTAFR, STK25, HIF1A, DDR2, PTK6, ITGB3, NOD1, SOCS1, MAP4K5, TGFB2, ADR…	1288	1049	16130	1.67136	7.6254e-08	6.99723e-08
GOTERM_BP	GO:0010562~positive regulation of phosphorus metabolic process	140	9.70071e-10	-9.0132	F2R, FGF13, ANXA2, LCP2, PLEK, ECT2, NIBAN1, CKS1B, CLCF1, WNT7A, ADRA1A, TRPV4, MRAP2, ADM, P2RY1, MMP9, CXCR4, ERBB2, PTGIR, GPR183, NOD2, CDC6, ABCA1, APOE, DUSP22, MAPKAPK3, EHD4, CD81, ADCY2, CCND1, PIK3CB, UBA52, PRKCD, LYN, CHEK2, RAP1B, PDPK1, RPS3, ANGPT1, LPAR1, NPTN, HSPA5, KDR, NGFR, GPNMB, CENPE, CCNB1, TTK, MYC, PTAFR, STK25, HIF1A, DDR2, PTK6, ITGB3, NOD1, SOCS1, MAP4K5, TGFB2, ADR…	1288	1049	16130	1.67136	7.6254e-08	6.99723e-08
GOTERM_BP	GO:0006886~intracellular protein transport	137	1.01159e-09	-8.995	GTSE1, F2R, STX11, HYAL2, RAB27A, KIF13B, ANP32B, ANXA2, RPS8, RPS13, ECT2, CTSA, SEC24D, RPL13A, STING1, ERBB2, RPS16, TRAM1, PACS1, RPS15, SSR3, RPL35, GPR26, TRAM2, RPSA, UBA52, PRKCD, RPL19, KCNB2, RPS14, RPL21, RPS11, RPS3, RPL23A, RPL27, ANGPT1, TONSL, NGFR, TAP1, RPL17, SEC61A1, RPL36, SEC61G, RPL39, BARD1, RPL30, RPS2, RPL18, RPL38, RPS19, TESC, RPL14, TGFB2, NAPA, RAMP1, GOLGA7B, RAC2, P…	1288	1020	16130	1.68205	7.82348e-08	7.179e-08
GOTERM_BP	GO:0032270~positive regulation of cellular protein metabolic process	177	1.02827e-09	-8.98789	F2R, UBE2C, DISC1, FGF13, ANP32B, ANXA2, LCP2, ECT2, NIBAN1, CKS1B, CLCF1, CDK4, WNT7A, ADRA1A, TRPV4, PHF19, P2RY1, MMP9, FOXL2, CXCR4, ERBB2, FANCI, UHRF1, GPR183, NOD2, CDC6, KLF4, APOE, DUSP22, MAPKAPK3, NUPR1, PSMB8, EHD4, CD81, ADCY2, MMP14, CCND1, FASLG, PIK3CB, UBA52, PRKCD, LYN, MAD2L1, CHEK2, RAP1B, PDPK1, RPS3, PSMA2, ANGPT1, LPAR1, NPTN, HSPA5, KDR, NGFR, GPNMB, CENPE, PSMB10, CCNB1, …	1288	1420	16130	1.561	7.8263e-08	7.18159e-08
GOTERM_BP	GO:0010647~positive regulation of cell communication	190	1.07116e-09	-8.97015	F2R, MFNG, HYAL2, PTPRJ, DISC1, IKBKE, ECT2, TRIM62, CANT1, LAMA2, CLCF1, WNT7A, ADRA1A, TRPV4, SRPX, NEK6, P2RY1, MMP9, STK36, FOXL2, CXCR4, ERBB2, PTGIR, GPR183, NOD2, PRMT5, CPNE1, GPR18, GFI1, DDIT3, MAPK8, HMOX1, DUSP22, MAPKAPK3, PSMB8, CD81, FASLG, PIK3CB, RASGRF1, UBA52, PRKCD, LYN, RAP1B, RPS3, PSMA2, ANGPT1, LPAR1, NPTN, BDNF, IRAK4, KDR, NGFR, GPNMB, PSMB10, SIRT3, TTK, STK25, G0S2, PC…	1288	1555	16130	1.53018	8.02531e-08	7.3642e-08
GOTERM_BP	GO:0051347~positive regulation of transferase activity	96	2.00597e-09	-8.69768	RFC4, F2R, UBE2C, FGF13, KIF14, LCP2, ECT2, GRM1, CKS1B, DVL2, PSMB1, NEK2, WNT7B, CXCR4, ERBB2, DUSP19, ADAM9, NOD2, PKN1, CDC6, MAP3K21, KLF4, MAP3K1, MAPKAPK3, GADD45A, MAP3K8, PDGFRB, PSMB8, CD81, DSCC1, SH3GLB1, ADCY2, CCND1, RIPK1, PIK3CB, MAP3K14, UBA52, PTK2, TPX2, PRKCD, LYN, MAD2L1, CDKN1A, PDPK1, RIPK3, RPS3, PSMA2, PSME1, PIK3CG, ANGPT1, LPAR1, MALT1, FBXO5, RFC2, HSPA5, PIK3R5, CENPE…	1288	640	16130	1.87849	1.47979e-07	1.35788e-07
GOTERM_BP	GO:0044267~cellular protein metabolic process	487	2.14192e-09	-8.6692	F2R, DISC1, RHO, IKBKE, LCP2, SMAD5, CDK4, SLC25A23, GTPBP1, FOXL2, PROS1, PRMT5, CDC6, EIF3H, DUSP22, MAPKAPK3, PRKD3, GRIN2C, EHD4, MMP14, RPSA, BTK, PRKCD, RPL19, CLPP, TRAIP, B4GALT1, RPL21, CHEK2, AP006333.1, ANGPT1, CPEB1, RASGRF2, HSPA5, ESCO2, PAK6, SIRT3, MYC, RPL39, CDCA8, RPL30, HCK, RPL18, BCL2L11, DDR2, PTK6, BIRC5, BTBD6, MAP4K5, TGFB2, CHRM3, GOLGA7B, PKN2, VANGL2, SPI1, FADD, MMP1…	1288	4900	16130	1.24466	1.55613e-07	1.42794e-07
GOTERM_BP	GO:0051247~positive regulation of protein metabolic process	184	2.34639e-09	-8.6296	F2R, UBE2C, DISC1, FGF13, ANP32B, ANXA2, LCP2, CD276, ECT2, NIBAN1, CKS1B, CLCF1, CDK4, WNT7A, ADRA1A, TRPV4, PHF19, P2RY1, MMP9, FOXL2, CXCR4, ERBB2, FANCI, UHRF1, GPR183, NOD2, CDC6, KLF4, MAPK8, APOE, HMOX1, DUSP22, MAPKAPK3, NUPR1, PSMB8, EHD4, CD81, ADCY2, MMP14, CCND1, FASLG, PIK3CB, UBA52, PRKCD, LYN, MAD2L1, CHEK2, RAP1B, PDPK1, RPS3, PSMA2, ANGPT1, LPAR1, NPTN, HSPA5, KDR, NGFR, GPNMB, C…	1288	1508	16130	1.52804	1.67925e-07	1.54091e-07
GOTERM_BP	GO:1901987~regulation of cell cycle phase transition	61	2.41242e-09	-8.61755	GTSE1, UBE2C, KIF14, PTPN6, ANXA1, RB1, CDK4, PSMB1, NEK6, TCIM, FANCI, CDC6, GADD45A, PSMB8, CENPF, SOX11, BUB1, CCND1, UBA52, DLGAP5, MAD2L1, SOX4, CHEK2, CDKN1A, PSMA2, PSME1, FBXO5, NPM1, NDC80, GPNMB, CENPE, PSMB10, CCNB1, TTK, CDK1, PSMB9, CDC20, ZFP36L2, RAD51B, ZFP36L1, PSMB3, E2F1, AURKA, KNTC1, BIRC5, TP53, PLK2, PCNA, CDCA5, ESPL1, RPA2, ANLN, HSPA2, RPS27L, E2F7, FAM83D, TERT, RCC2, C…	1288	336	16130	2.27357	1.70111e-07	1.56098e-07
GOTERM_BP	GO:1901990~regulation of mitotic cell cycle phase transition	58	2.55605e-09	-8.59243	GTSE1, UBE2C, KIF14, PTPN6, ANXA1, RB1, CDK4, PSMB1, NEK6, FANCI, CDC6, GADD45A, PSMB8, CENPF, BUB1, CCND1, UBA52, DLGAP5, MAD2L1, SOX4, CHEK2, CDKN1A, PSMA2, PSME1, FBXO5, NPM1, NDC80, GPNMB, CENPE, PSMB10, CCNB1, TTK, CDK1, PSMB9, CDC20, ZFP36L2, RAD51B, ZFP36L1, PSMB3, E2F1, AURKA, KNTC1, BIRC5, TP53, PLK2, PCNA, CDCA5, ESPL1, RPA2, ANLN, HSPA2, RPS27L, E2F7, TERT, RCC2, CCNA2, CDC45, KCNH5	1288	312	16130	2.32805	1.77627e-07	1.62994e-07
GOTERM_BP	GO:0007062~sister chromatid cohesion	33	4.01508e-09	-8.39631	CENPI, NDC80, CENPE, SMC5, RB1, AURKB, NSL1, CDC20, MIS12, CENPL, CDCA8, CENPN, KNTC1, BIRC5, DDX11, SPC24, DSN1, SPC25, CENPH, ZWILCH, CDCA5, ESPL1, DSCC1, CENPF, CENPS, KNL1, BUB1, ERCC6L, CENPK, RCC2, MAPRE1, MAD2L1, SGO1	1288	128	16130	3.22866	2.75033e-07	2.52377e-07
GOTERM_BP	GO:1902533~positive regulation of intracellular signal transduction	123	8.09026e-09	-8.09204	F2R, PTPRJ, IKBKE, ECT2, TRIM62, CANT1, CLCF1, WNT7A, ADRA1A, TRPV4, NEK6, P2RY1, CXCR4, ERBB2, PTGIR, GPR183, NOD2, CPNE1, GPR18, DDIT3, HMOX1, DUSP22, MAPKAPK3, CD81, FASLG, PIK3CB, RASGRF1, UBA52, LYN, RAP1B, RPS3, ANGPT1, LPAR1, NPTN, IRAK4, KDR, NGFR, GPNMB, STK25, BCL2L11, PTK6, NOD1, SOCS1, MAP4K5, PLK2, TGFB2, ADRB1, VANGL2, FADD, GSDME, NCK1, MYD88, CIB1, MDFIC, FGR, CXCR3, CD4, IQGAP1, …	1288	915	16130	1.68346	5.46378e-07	5.01368e-07
GOTERM_BP	GO:0043408~regulation of MAPK cascade	98	9.26174e-09	-8.03331	F2R, HYAL2, PTPRJ, WNT7A, ADRA1A, TRPV4, SPRY1, P2RY1, CXCR4, ERBB2, RRAS, GPR183, NOD2, PRMT5, KLF4, APOE, DUSP22, MAPKAPK3, CD81, PIK3CB, UBA52, PRKCD, LYN, RAP1B, RPS3, ANGPT1, LPAR1, NPTN, KDR, NGFR, GPNMB, SIRT3, MYC, STK25, NOD1, MAP4K5, TGFB2, VANGL2, MYD88, CCN1, CIB1, MDFIC, FAM83D, C1QL4, IQGAP1, TRIB2, MYDGF, PTPN6, GRM1, DVL2, WNT7B, MAGI3, ID1, GLIPR2, DUSP19, ADAM9, TNFRSF19, PKN1, …	1288	678	16130	1.81015	6.16806e-07	5.65995e-07
GOTERM_BP	GO:0043067~regulation of programmed cell death	172	1.03717e-08	-7.98415	F2R, DAD1, MNT, HYAL2, ANP32B, EGR3, ANXA1, ECT2, ARHGEF9, CLCF1, CDK4, WNT7A, ADM, SIX4, SRPX, MMP9, FOXL2, NOD2, MELK, CTSB, KLF4, DDIT3, MAPK8, APOE, HMOX1, NUPR1, ITGAV, CHL1, MDK, HS1BP3, OBSCN, NET1, BTK, FASLG, CORO1A, UBA52, PRKCD, TXNDC5, LYN, MAD2L1, B4GALT1, HMGB2, STIL, CHEK2, PDPK1, RPS3, ANGPT1, LPAR1, FIGNL1, BDNF, RASGRF2, HSPA5, KDR, TOP2A, NGFR, MYC, AURKB, TFAP2A, STK17B, ANXA5…	1288	1413	16130	1.52442	6.81267e-07	6.25146e-07
GOTERM_BP	GO:0030335~positive regulation of cell migration	66	1.52396e-08	-7.81703	GTSE1, ROCK2, F2R, ETS1, COL1A1, SMAD3, C3AR1, INSM1, DOCK1, WNT7A, TRPV4, NFE2L2, MMP9, GLIPR2, ADAM9, SEMA3F, LAMB1, POSTN, PDGFRB, ITGAV, MMP14, CORO1A, PTK2, SRPX2, LYN, RACK1, ANGPT1, LPAR1, HSPA5, KDR, GPNMB, FN1, MYC, MYO1C, ITGA3, PTAFR, ANXA3, PTK2B, HIF1A, DDR2, ITGB3, TGFB2, PLVAP, KIT, PFN1, RAC2, FERMT3, CMKLR1, ARHGEF39, FADD, PGF, ANO6, PDGFD, SPARC, CCN1, CIB1, TERT, TGFBR2, SLC8A…	1288	395	16130	2.0925	9.87486e-07	9.0614e-07
[truncated: 219 more rows]

## Sheet: 14dpl-LGG_shared_genes
Category	Term	Count	PValue	log10(Pvalue)	Genes	List.Total	Pop.Hits	Pop.Total	Fold.Enrichment	Benjamini	FDR
[truncated: 277 more rows]

## Sheet: 14dpl-GBM_shared_genes
Category	Term	Count	PValue	log10(Pvalue)	Genes	List.Total	Pop.Hits	Pop.Total	Fold.Enrichment	Benjamini	FDR
[truncated: 288 more rows]
